# Supplementary material for: Lifestyles Shape the Cytochrome P450 Repertoire of the Bacterial Phylum Proteobacteria
Source: MDPI journal article supplement (doi:10.3390/ijms23105821), 2022-05-22
Supplement: s1 [file s1]

# Lifestyles Shape the Cytochrome P450 Repertoire of the Bacterial Phylum *Proteobacteria*

Siphesihle Msweli <sup>1</sup>, Andiswa Chonco <sup>1</sup>, Lihle Msweli <sup>1</sup>, Puleng Rosinah Syed <sup>2</sup>, Rajshekhar Karpoormath <sup>2</sup>, Wanping Chen <sup>3</sup>, Dominik Gront <sup>4</sup>, Bridget Valeria Zinhle Nkosi <sup>1</sup>, David R Nelson <sup>5,\*</sup> and Khajamohiddin Syed <sup>1,\*</sup>

<sup>1</sup> Department of Biochemistry and Microbiology, Faculty of Science and Agriculture, University of Zululand, KwaDlangezwa 3886, South Africa; siphesihlemsweli2001@gmail.com (S.M.); angelicaandyc@gmail.com (A.C.); lihle.msweli9991@gmail.com (L.M.); brilenhle@gmail.com (B.V.Z.N.)

<sup>2</sup> Department of Pharmaceutical Chemistry, College of Health Sciences, University of KwaZulu-Natal, Durban 4000, South Africa; prosinah@gmail.com (P.R.S.); Karpoormath@ukzn.ac.za (R.K.)

<sup>3</sup> Department of Molecular Microbiology and Genetics, University of Göttingen, 37077 Göttingen, Germany; chenwanping1@foxmail.com

<sup>4</sup> Biological and Chemical Research Center, Faculty of Chemistry, University of Warsaw, Pasteura 1, 02-093 Warsaw, Poland; dgront@gmail.com

<sup>5</sup> Department of Microbiology, Immunology and Biochemistry, University of Tennessee Health Science Center, Memphis, TN 38163, USA

\* Correspondence: drnelson1@gmail.com (D.R.N.); khajamohiddinsyed@gmail.com (K.S.); Tel.: +1-901-448-8303 (D.R.N.); +27-035-902-6857 (K.S.)

**Citation:** Msweli, S.; Chonco, A.; Msweli, L.; Syed, P.R.; Karpoormath, R.; Chen, W.; Gront, D.; Nkosi, B.V.Z.; Nelson, D.R. and Syed, K. Lifestyles Shape the Cytochrome P450 Repertoire of the Bacterial Phylum *Proteobacteria*. *Int. J. Mol. Sci.* **2022**, *23*, 5812. <https://doi.org/10.3390/ijms23105821>

Academic Editor: Patrick M. Dansette

Received: 30 March 2022

Accepted: 7 May 2022

Published: 22 May 2022

**Publisher's Note:** MDPI stays neutral with regard to jurisdictional claims in published maps and institutional affiliations.

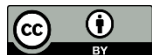

**Copyright:** © 2022 by the authors. Submitted for possible open access publication under the terms and conditions of the Creative Commons Attribution (CC BY) license (<https://creativecommons.org/licenses/by/4.0/>).

## Table of Contents

Table S1. Information on proteobacterial species and their respective genera was used in the study. Species abbreviations and the P450 count of different species were also presented in the table. Species information is presented as per their class. .... 3

Betaproteobacteria..... 3

Deltaproteobacteria..... 21

Epsilonproteobacteria..... 25

Table S2. Comparative analysis of P450 families and subfamilies in different classes of *Proteobacteria*. P450 family and subfamily data for *Alphaproteobacteria* and *Gammaproteobacteria* is retrieved from the published articles <sup>1,2</sup> and used for comparative analysis. .... 34

Table S3. P450 identified and annotated in this study is presented as per their class. A header follows each P450 sequence consisting of protein ID, database, P450 name, species name, species code, and an abbreviation for the class, such as BP for *Betaproteobacteria*, DP for *Deltaproteobacteria*, and EP for *Epsilonproteobacteria*. .... 54

Betaproteobacteria..... 54

Deltaproteobacteria..... 296

Epsilonproteobacteria..... 392

Table S4. Identification of P450s that are part of the secondary metabolite biosynthetic gene clusters (sm-BGCs) in alphaproteobacterial species. Reference cluster information was obtained by performing BLAST at the anti-SMASH database <sup>3</sup>, as indicated in the materials and methods section. The cluster type and most similar known cluster names available in the anti-SMASH database<sup>3</sup>, were listed in the table. .... 411

Betaproteobacteria..... 411

Deltaproteobacteria..... 417

Epsilonproteobacteria..... 422

Table S1. Information on proteobacterial species and their respective genera was used in the study. Species abbreviations and the P450 count of different species were also presented in the table. Species information is presented as per their class.

*Betaproteobacteria*

| Genus            | Number of species | Number of species having P450s | Species name                                           | Species codes | P450 count |
|------------------|-------------------|--------------------------------|--------------------------------------------------------|---------------|------------|
| <i>Neisseria</i> | 40                | 0                              | <i>Neisseria meningitidis</i> MC58 (serogroup B)       | nme           | 0          |
|                  |                   |                                | <i>Neisseria meningitidis</i> alpha710 (serogroup B)   | nmp           | 0          |
|                  |                   |                                | <i>Neisseria meningitidis</i> H44/76 (serogroup B)     | nmh           | 0          |
|                  |                   |                                | <i>Neisseria meningitidis</i> G2136 (serogroup B)      | nmd           | 0          |
|                  |                   |                                | <i>Neisseria meningitidis</i> M01-240149 (serogroup B) | nmm           | 0          |
|                  |                   |                                | <i>Neisseria meningitidis</i> M01-240355 (serogroup B) | nms           | 0          |
|                  |                   |                                | <i>Neisseria meningitidis</i> M04-240196 (serogroup B) | nmq           | 0          |
|                  |                   |                                | <i>Neisseria meningitidis</i> NZ-05/33 (serogroup B)   | nmz           | 0          |
|                  |                   |                                | <i>Neisseria meningitidis</i> Z2491 (serogroup A)      | nma           | 0          |
|                  |                   |                                | <i>Neisseria meningitidis</i> WUE 2594 (serogroup A)   | nmw           | 0          |
|                  |                   |                                | <i>Neisseria meningitidis</i> 510612 (serogroup A)     | nmx           | 0          |
|                  |                   |                                | <i>Neisseria meningitidis</i> FAM18 (serogroup C)      | nmc           | 0          |
|                  |                   |                                | <i>Neisseria meningitidis</i> 053442 (serogroup C)     | nmn           | 0          |
|                  |                   |                                | <i>Neisseria meningitidis</i> 8013 (serogroup C)       | nmt           | 0          |
|                  |                   |                                | <i>Neisseria meningitidis</i> alpha14 (cnl strain)     | nmi           | 0          |
|                  |                   |                                | <i>Neisseria gonorrhoeae</i> FA 1090                   | ngo           | 0          |
|                  |                   |                                | <i>Neisseria gonorrhoeae</i> NCCP11945                 | ngk           | 0          |
|                  |                   |                                | <i>Neisseria lactamica</i>                             | nla           | 0          |
|                  |                   |                                | <i>Neisseria elongata</i>                              | nel           | 0          |
|                  |                   |                                | <i>Neisseria weaveri</i>                               | nwe           | 0          |
|                  |                   |                                | <i>Neisseria mucosa</i> FDAARGOS_260                   | nsi           | 0          |

|                        |   |   |                                    |      |   |
|------------------------|---|---|------------------------------------|------|---|
|                        |   |   | <i>Neisseria mucosa</i> ATCC 19696 | nmj  | 0 |
|                        |   |   | <i>Neisseria chenwenguii</i>       | nei  | 0 |
|                        |   |   | <i>Neisseria</i> sp. KEM232        | nek  | 0 |
|                        |   |   | <i>Neisseria flavescens</i>        | nfv  | 0 |
|                        |   |   | <i>Neisseria subflava</i>          | nsf  | 0 |
|                        |   |   | <i>Neisseria zalophi</i>           | nzl  | 0 |
|                        |   |   | <i>Neisseria animalis</i>          | naq  | 0 |
|                        |   |   | <i>Neisseria brasiliensis</i>      | nbl  | 0 |
|                        |   |   | <i>Neisseria zoodegmatidis</i>     | nzo  | 0 |
|                        |   |   | <i>Neisseria canis</i>             | nci  | 0 |
|                        |   |   | <i>Neisseria cinerea</i>           | ncz  | 0 |
|                        |   |   | <i>Neisseria animaloris</i>        | nani | 0 |
|                        |   |   | <i>Neisseria bacilliformis</i>     | nbc  | 0 |
|                        |   |   | <i>Neisseria wadsworthii</i>       | nwd  | 0 |
|                        |   |   | <i>Neisseria shayegani</i>         | nsg  | 0 |
|                        |   |   | <i>Neisseria muscoli</i>           | nmus | 0 |
|                        |   |   | <i>Neisseria sicca</i>             | nsc  | 0 |
|                        |   |   | <i>Neisseria perflava</i>          | npf  | 0 |
|                        |   |   | <i>Neisseria dentiae</i>           | ndn  | 0 |
| <i>Snodgrassella</i>   | 1 | 0 | <i>Snodgrassella alvi</i>          | salv | 0 |
| <i>Kingella</i>        | 2 | 0 | <i>Kingella kingae</i>             | kki  | 0 |
|                        |   |   | <i>Kingella oralis</i>             | koa  | 0 |
| <i>Vitreoscilla</i>    | 2 | 2 | <i>Vitreoscilla filiformis</i>     | vff  | 2 |
|                        |   |   | <i>Vitreoscilla</i> sp. C1         | vit  | 1 |
| <i>Eikenella</i>       | 2 | 0 | <i>Eikenella corrodens</i>         | ecor | 0 |
|                        |   |   | <i>Eikenella exigua</i>            | eex  | 0 |
| <i>Simonsiella</i>     | 1 | 0 | <i>Simonsiella muelleri</i>        | smur | 0 |
| <i>Alysiella</i>       | 1 | 0 | <i>Alysiella filiformis</i>        | aff  | 0 |
| <i>Conchiformibius</i> | 1 | 0 | <i>Conchiformibius steedae</i>     | cste | 0 |

|                           |    |    |                                               |      |   |
|---------------------------|----|----|-----------------------------------------------|------|---|
| <i>Aquella</i>            | 1  | 0  | <i>Aquella oligotrophica</i>                  | nba  | 0 |
| <i>Paralysiella</i>       | 1  | 0  | <i>Paralysiella testudinis</i>                | ptes | 0 |
| <i>Chromobacterium</i>    | 8  | 7  | <i>Chromobacterium violaceum</i>              | cvi  | 1 |
|                           |    |    | <i>Chromobacterium vaccinii</i>               | cvc  | 1 |
|                           |    |    | <i>Chromobacterium</i> sp. ATCC 53434         | chro | 0 |
|                           |    |    | <i>Chromobacterium phragmitis</i> IIBBL 112-1 | chri | 2 |
|                           |    |    | <i>Chromobacterium phragmitis</i> IIBBL 274-1 | chrb | 1 |
|                           |    |    | <i>Chromobacterium rhizoryzae</i>             | crz  | 1 |
|                           |    |    | <i>Chromobacterium paludis</i>                | chrm | 2 |
|                           |    |    | <i>Chromobacterium haemolyticum</i>           | chae | 1 |
| <i>Iodobacter</i>         | 2  | 1  | <i>Iodobacter ciconiae</i>                    | iod  | 0 |
|                           |    |    | <i>Iodobacter fluviatilis</i>                 | ifl  | 1 |
| <i>Laribacter</i>         | 1  | 0  | <i>Laribacter hongkongensis</i>               | lhk  | 0 |
| <i>Pseudogulbenkiania</i> | 1  | 1  | <i>Pseudogulbenkiania</i> sp. NH8B            | pse  | 1 |
| <i>Jeongeupia</i>         | 1  | 0  | <i>Jeongeupia</i> sp. USM3                    | jeu  | 0 |
| <i>Aquaspirillum</i>      | 1  | 0  | <i>Aquaspirillum</i> sp. LM1                  | aql  | 0 |
| <i>Aquitalea</i>          | 2  | 1  | <i>Aquitalea magnusonii</i>                   | amah | 1 |
|                           |    |    | <i>Aquitalea</i> sp. USM4                     | aqs  | 0 |
| <i>Deefgea</i>            | 1  | 0  | <i>Deefgea</i> sp. D17                        | dee  | 0 |
| <i>Chitinibacter</i>      | 2  | 0  | <i>Chitinibacter bivalviorum</i>              | chiz | 0 |
|                           |    |    | <i>Chitinibacter fontanus</i>                 | cfon | 0 |
| <i>Vogesella</i>          | 1  | 0  | <i>Vogesella</i> sp. XCS3                     | vog  | 0 |
| <i>Ralstonia</i>          | 14 | 13 | <i>Ralstonia solanacearum</i> GMI1000         | rso  | 0 |
|                           |    |    | <i>Ralstonia solanacearum</i> CFBP2957        | rsc  | 1 |
|                           |    |    | <i>Ralstonia solanacearum</i> PSI07           | rsl  | 3 |
|                           |    |    | <i>Ralstonia solanacearum</i> Po82            | rsn  | 4 |
|                           |    |    | <i>Ralstonia solanacearum</i> CMR15           | rsm  | 3 |
|                           |    |    | <i>Ralstonia solanacearum</i> FQY_4           | rse  | 1 |
|                           |    |    | <i>Ralstonia solanacearum</i> UY031           | rsy  | 2 |

|                     |    |    |                                                     |      |   |
|---------------------|----|----|-----------------------------------------------------|------|---|
|                     |    |    | <i>Ralstonia pickettii</i> 12J                      | rpi  | 2 |
|                     |    |    | <i>Ralstonia pickettii</i> 12D                      | rpf  | 2 |
|                     |    |    | <i>Ralstonia pickettii</i> DTP0602                  | rpj  | 2 |
|                     |    |    | <i>Ralstonia mannitolilytica</i>                    | rmn  | 2 |
|                     |    |    | <i>Ralstonia insidiosa</i>                          | rin  | 3 |
|                     |    |    | <i>Ralstonia pseudosolanacearum</i>                 | rpu  | 1 |
|                     |    |    | <i>Ralstonia syzygii</i> subsp. <i>celebesensis</i> | rsg  | 2 |
| <i>Cupriavidus</i>  | 13 | 13 | <i>Cupriavidus necator</i> H16                      | reh  | 4 |
|                     |    |    | <i>Cupriavidus necator</i> N-1                      | cnc  | 7 |
|                     |    |    | <i>Cupriavidus necator</i> NH9                      | cuH  | 3 |
|                     |    |    | <i>Cupriavidus pinatubonensis</i> JMP134            | reu  | 2 |
|                     |    |    | <i>Cupriavidus metallidurans</i>                    | rme  | 5 |
|                     |    |    | <i>Cupriavidus taiwanensis</i>                      | cti  | 3 |
|                     |    |    | <i>Cupriavidus basilensis</i>                       | cbw  | 7 |
|                     |    |    | <i>Cupriavidus gilardii</i>                         | cgd  | 2 |
|                     |    |    | <i>Cupriavidus</i> sp. USMAHM13                     | ccup | 1 |
|                     |    |    | <i>Cupriavidus malaysiensis</i>                     | cup  | 1 |
|                     |    |    | <i>Cupriavidus</i> sp. USMAA2-4                     | cuu  | 2 |
|                     |    |    | <i>Cupriavidus pauculus</i>                         | cpau | 6 |
|                     |    |    | <i>Cupriavidus oxalaticus</i>                       | cox  | 4 |
| <i>Burkholderia</i> | 90 | 82 | <i>Burkholderia mallei</i> ATCC 23344               | bma  | 3 |
|                     |    |    | <i>Burkholderia mallei</i> SAVP1                    | bmv  | 3 |
|                     |    |    | <i>Burkholderia mallei</i> NCTC 10229               | bml  | 3 |
|                     |    |    | <i>Burkholderia mallei</i> NCTC 10247               | bmN  | 3 |
|                     |    |    | <i>Burkholderia mallei</i> 23344                    | bmal | 2 |
|                     |    |    | <i>Burkholderia mallei</i> 6                        | bmae | 1 |
|                     |    |    | <i>Burkholderia mallei</i> BMQ                      | bmaq | 2 |
|                     |    |    | <i>Burkholderia mallei</i> 2000031063               | bmai | 3 |
|                     |    |    | <i>Burkholderia mallei</i> FMH 23344                | bmaf | 2 |

|  |  |  |                                                       |      |   |
|--|--|--|-------------------------------------------------------|------|---|
|  |  |  | <i>Burkholderia mallei</i> NCTC 10247                 | bmaz | 2 |
|  |  |  | <i>Burkholderia mallei</i> 2002734299                 | bmab | 2 |
|  |  |  | <i>Burkholderia pseudomallei</i> K96243               | bps  | 2 |
|  |  |  | <i>Burkholderia pseudomallei</i> 1710b                | bpm  | 2 |
|  |  |  | <i>Burkholderia pseudomallei</i> 1106a                | bpl  | 3 |
|  |  |  | <i>Burkholderia pseudomallei</i> 668                  | bpd  | 2 |
|  |  |  | <i>Burkholderia pseudomallei</i> MSHR346              | bpr  | 0 |
|  |  |  | <i>Burkholderia pseudomallei</i> MSHR305              | bpse | 2 |
|  |  |  | <i>Burkholderia pseudomallei</i> MSHR511              | bpsm | 3 |
|  |  |  | <i>Burkholderia pseudomallei</i> MSHR146              | bpsu | 3 |
|  |  |  | <i>Burkholderia pseudomallei</i> MSHR520              | bpsd | 3 |
|  |  |  | <i>Burkholderia pseudomallei</i> 1026b                | bpz  | 3 |
|  |  |  | <i>Burkholderia pseudomallei</i> BPC006               | bpq  | 3 |
|  |  |  | <i>Burkholderia pseudomallei</i> NCTC 13179           | bpk  | 3 |
|  |  |  | <i>Burkholderia pseudomallei</i> HBPUB10134a          | bpsh | 2 |
|  |  |  | <i>Burkholderia pseudomallei</i> NAU35A-3             | bpsa | 2 |
|  |  |  | <i>Burkholderia pseudomallei</i> A79A                 | bpso | 2 |
|  |  |  | <i>Burkholderia pseudomallei</i> TSV202               | but  | 2 |
|  |  |  | <i>Burkholderia thailandensis</i> E264                | bte  | 4 |
|  |  |  | <i>Burkholderia thailandensis</i> 2002721723          | btq  | 4 |
|  |  |  | <i>Burkholderia thailandensis</i> E444                | btj  | 4 |
|  |  |  | <i>Burkholderia thailandensis</i> H0587               | btz  | 3 |
|  |  |  | <i>Burkholderia thailandensis</i> MSMB121             | btd  | 3 |
|  |  |  | <i>Burkholderia thailandensis</i> MSMB59              | btv  | 3 |
|  |  |  | <i>Burkholderia thailandensis</i> E254                | bthe | 3 |
|  |  |  | <i>Burkholderia thailandensis</i> USAMRU Malaysia #20 | bthm | 3 |
|  |  |  | <i>Burkholderia thailandensis</i> 2003015869          | btha | 4 |
|  |  |  | <i>Burkholderia thailandensis</i> 2002721643          | bthl | 3 |
|  |  |  | <i>Burkholderia oklahomensis</i> E0147                | bok  | 0 |

|  |  |                                                     |      |   |
|--|--|-----------------------------------------------------|------|---|
|  |  | <i>Burkholderia oklahomensis</i> C6786              | boc  | 2 |
|  |  | <i>Burkholderia mayonis</i>                         | buu  | 2 |
|  |  | <i>Burkholderia savannae</i>                        | bsav | 0 |
|  |  | <i>Burkholderia vietnamiensis</i> G4                | bvi  | 1 |
|  |  | <i>Burkholderia vietnamiensis</i> LMG 10929         | bve  | 1 |
|  |  | <i>Burkholderia lata</i>                            | bur  | 4 |
|  |  | <i>Burkholderia cenocepacia</i> AU 1054             | bcn  | 1 |
|  |  | <i>Burkholderia cenocepacia</i> HI2424              | bch  | 1 |
|  |  | <i>Burkholderia cenocepacia</i> MC0-3               | bcm  | 5 |
|  |  | <i>Burkholderia cenocepacia</i> J2315               | bcj  | 2 |
|  |  | <i>Burkholderia cenocepacia</i> DDS 22E-1           | bcen | 2 |
|  |  | <i>Burkholderia cenocepacia</i> DWS 37E-2           | bcew | 1 |
|  |  | <i>Burkholderia cenocepacia</i> H111                | bceo | 2 |
|  |  | <i>Burkholderia ambifaria</i> AMMD                  | bam  | 1 |
|  |  | <i>Burkholderia ambifaria</i> MC40-6                | bac  | 1 |
|  |  | <i>Burkholderia multivorans</i> ATCC 17616 (Tohoku) | bmj  | 3 |
|  |  | <i>Burkholderia multivorans</i> ATCC 17616 (JGI)    | bmu  | 4 |
|  |  | <i>Burkholderia multivorans</i> DDS 15A-1           | bmj  | 5 |
|  |  | <i>Burkholderia multivorans</i> ATCC BAA-247        | bmj  | 2 |
|  |  | <i>Burkholderia cepacia</i> GG4                     | bct  | 2 |
|  |  | <i>Burkholderia cepacia</i> DDS 7H-2                | bced | 2 |
|  |  | <i>Burkholderia cepacia</i> ATCC 25416              | bcep | 0 |
|  |  | <i>Burkholderia dolosa</i>                          | bdl  | 1 |
|  |  | <i>Burkholderia pyrrocinia</i>                      | bpyr | 2 |
|  |  | <i>Burkholderia contaminans</i>                     | bcon | 4 |
|  |  | <i>Burkholderia ubonensis</i>                       | bub  | 3 |
|  |  | <i>Burkholderia diffusa</i>                         | bdf  | 1 |
|  |  | <i>Burkholderia latens</i>                          | blat | 0 |
|  |  | <i>Burkholderia territorii</i>                      | btei | 2 |



|                         |    |    |                                                  |      |   |
|-------------------------|----|----|--------------------------------------------------|------|---|
|                         |    |    | <i>Burkholderia seminalis</i>                    | bsem | 1 |
|                         |    |    | <i>Burkholderia pseudomultivorans</i>            | bpsl | 1 |
|                         |    |    | <i>Burkholderia metallica</i>                    | bmec | 0 |
|                         |    |    | <i>Burkholderia stagnalis</i>                    | bstg | 1 |
|                         |    |    | <i>Burkholderia stabilis</i>                     | bstl | 1 |
|                         |    |    | <i>Burkholderia anthina</i>                      | bann | 2 |
|                         |    |    | <i>Burkholderia glumae</i> BGR1                  | bgl  | 1 |
|                         |    |    | <i>Burkholderia glumae</i> LMG 2196 = ATCC 33617 | bgu  | 1 |
|                         |    |    | <i>Burkholderia</i> sp. CCGE1001                 | bug  | 3 |
|                         |    |    | <i>Burkholderia</i> sp. CCGE1003                 | bgf  | 4 |
|                         |    |    | <i>Burkholderia gladioli</i> BSR3                | bgd  | 4 |
|                         |    |    | <i>Burkholderia gladioli</i> ATCC 10248          | bgo  | 3 |
|                         |    |    | <i>Burkholderia</i> sp. YI23                     | byi  | 7 |
|                         |    |    | <i>Burkholderia</i> sp. KJ006                    | buk  | 1 |
|                         |    |    | <i>Burkholderia</i> sp. RPE67                    | bue  | 7 |
|                         |    |    | <i>Burkholderia</i> sp. 2002721687               | bul  | 3 |
|                         |    |    | <i>Burkholderia</i> sp. HB1                      | buq  | 2 |
|                         |    |    | <i>Burkholderia plantarii</i> PG1                | bgp  | 2 |
|                         |    |    | <i>Burkholderia plantarii</i> ATCC 43733         | bpla | 3 |
|                         |    |    | <i>Burkholderia</i> sp. Bp5365                   | bud  | 3 |
|                         |    |    | <i>Burkholderia</i> sp. PAMC 26561               | bum  | 0 |
|                         |    |    | <i>Burkholderia</i> sp. PAMC 28687               | bui  | 0 |
|                         |    |    | <i>Burkholderia</i> sp. JP2-270                  | burk | 1 |
| <i>Paraburkholderia</i> | 24 | 23 | <i>Paraburkholderia xenovorans</i> LB400         | bxe  | 6 |
|                         |    |    | <i>Paraburkholderia xenovorans</i> LB400         | bxb  | 5 |
|                         |    |    | <i>Paraburkholderia phymatum</i>                 | bph  | 4 |
|                         |    |    | <i>Paraburkholderia atlantica</i> CCGE1002       | bge  | 2 |
|                         |    |    | <i>Paraburkholderia phenoliruptrix</i>           | bpx  | 3 |
|                         |    |    | <i>Paraburkholderia phytofirmans</i> PsJN        | bpy  | 2 |

|                         |    |   |                                              |      |   |
|-------------------------|----|---|----------------------------------------------|------|---|
|                         |    |   | <i>Paraburkholderia phytofirmans</i> OLGA172 | buz  | 0 |
|                         |    |   | <i>Paraburkholderia fungorum</i>             | bfn  | 6 |
|                         |    |   | <i>Paraburkholderia caribensis</i>           | bcai | 3 |
|                         |    |   | <i>Paraburkholderia spreintiae</i>           | pspw | 5 |
|                         |    |   | <i>Paraburkholderia</i> sp. SOS3             | para | 2 |
|                         |    |   | <i>Paraburkholderia aromaticivorans</i>      | parb | 1 |
|                         |    |   | <i>Paraburkholderia hospita</i>              | phs  | 7 |
|                         |    |   | <i>Paraburkholderia terrae</i>               | pter | 9 |
|                         |    |   | <i>Paraburkholderia graminis</i>             | pgp  | 2 |
|                         |    |   | <i>Paraburkholderia caledonica</i>           | pcj  | 4 |
|                         |    |   | <i>Paraburkholderia terricola</i>            | pts  | 3 |
|                         |    |   | <i>Paraburkholderia caffeinilytica</i>       | pcaf | 2 |
|                         |    |   | <i>Paraburkholderia megapolitana</i>         | pmeg | 5 |
|                         |    |   | <i>Paraburkholderia tropica</i>              | ptro | 4 |
|                         |    |   | <i>Paraburkholderia ginsengisoli</i>         | pgis | 2 |
|                         |    |   | <i>Paraburkholderia acidiphila</i>           | pacp | 5 |
|                         |    |   | <i>Paraburkholderia acidisoli</i>            | pacs | 2 |
|                         |    |   | <i>Paraburkholderia edwinii</i>              | pew  | 9 |
| <i>Mycetohabitans</i>   | 1  | 1 | <i>Mycetohabitans rhizoxinica</i>            | brh  | 1 |
| <i>Polynucleobacter</i> | 4  | 0 | <i>Polynucleobacter asymbioticus</i>         | pnu  | 0 |
|                         |    |   | <i>Polynucleobacter necessarius</i>          | pne  | 0 |
|                         |    |   | <i>Polynucleobacter duraquae</i>             | pdq  | 0 |
|                         |    |   | <i>Polynucleobacter paneuropaeus</i>         | poh  | 0 |
| <i>Pandoraea</i>        | 14 | 6 | <i>Pandoraea pnomenusa</i> 3kgm              | ppk  | 1 |
|                         |    |   | <i>Pandoraea pnomenusa</i> RB38              | ppno | 0 |
|                         |    |   | <i>Pandoraea pnomenusa</i> DSM 16536         | ppnm | 0 |
|                         |    |   | <i>Pandoraea pnomenusa</i>                   | prb  | 0 |
|                         |    |   | <i>Pandoraea pulmonicola</i>                 | ppul | 1 |
|                         |    |   | <i>Pandoraea sputorum</i>                    | pspu | 0 |

|                         |    |    |                                        |      |   |
|-------------------------|----|----|----------------------------------------|------|---|
|                         |    |    | <i>Pandoraea apista</i>                | papi | 1 |
|                         |    |    | <i>Pandoraea vervacti</i>              | pve  | 0 |
|                         |    |    | <i>Pandoraea oxalativorans</i>         | pox  | 0 |
|                         |    |    | <i>Pandoraea thiooxydans</i>           | ptx  | 0 |
|                         |    |    | <i>Pandoraea faecigallinarum</i>       | pfg  | 0 |
|                         |    |    | <i>Pandoraea norimbergensis</i>        | pnr  | 1 |
|                         |    |    | <i>Pandoraea</i> sp. XY-2              | pand | 1 |
|                         |    |    | <i>Pandoraea fibrosis</i>              | pfib | 2 |
| <i>Paucimonas</i>       | 1  | 0  | <i>Paucimonas lemoignei</i>            | plg  | 0 |
| <i>Ephemeroptercola</i> | 1  | 0  | <i>Ephemeroptercola cinctiostellae</i> | hyf  | 0 |
| <i>Lautropia</i>        | 1  | 0  | <i>Lautropia mirabilis</i>             | lmir | 0 |
| <i>Mycoavidus</i>       | 1  | 0  | <i>Mycoavidus cysteinexigens</i>       | mcys | 0 |
| <i>Caballeronia</i>     | 2  | 2  | <i>Caballeronia</i> sp. SBC2           | caba | 2 |
|                         |    |    | <i>Caballeronia insecticola</i>        | buo  | 2 |
| <i>Limnobacter</i>      | 1  | 1  | <i>Limnobacter</i> sp. SAORIC-580      | limn | 1 |
| <i>Chitinimonas</i>     | 1  | 1  | <i>Chitinimonas arctica</i>            | cari | 1 |
| <i>Vallotia</i>         | 3  | 0  | <i>Candidatus Vallotia tarda</i>       | vtr  | 0 |
|                         |    |    | <i>Candidatus Vallotia lariciata</i>   | vla  | 0 |
|                         |    |    | <i>Candidatus Vallotia cooleyia</i>    | vcv  | 0 |
| <i>Bordetella</i>       | 23 | 15 | <i>Bordetella pertussis</i> Tohama I   | bpe  | 1 |
|                         |    |    | <i>Bordetella pertussis</i> CS         | bpc  | 1 |
|                         |    |    | <i>Bordetella pertussis</i> 18323      | bper | 1 |
|                         |    |    | <i>Bordetella pertussis</i> B1917      | bpet | 1 |
|                         |    |    | <i>Bordetella pertussis</i> 137        | bpeu | 1 |
|                         |    |    | <i>Bordetella parapertussis</i> Bpp5   | bpar | 1 |
|                         |    |    | <i>Bordetella parapertussis</i> 12822  | bpa  | 1 |
|                         |    |    | <i>Bordetella bronchiseptica</i> 253   | bbh  | 1 |
|                         |    |    | <i>Bordetella bronchiseptica</i> RB50  | bbr  | 1 |
|                         |    |    | <i>Bordetella bronchiseptica</i> MO149 | bbm  | 1 |

|                      |    |   |                                                           |      |   |
|----------------------|----|---|-----------------------------------------------------------|------|---|
|                      |    |   | <i>Bordetella bronchiseptica</i> S798                     | bbx  | 1 |
|                      |    |   | <i>Bordetella petrii</i>                                  | bpt  | 1 |
|                      |    |   | <i>Bordetella avium</i>                                   | bav  | 0 |
|                      |    |   | <i>Bordetella holmesii</i> ATCC 51541                     | bho  | 0 |
|                      |    |   | <i>Bordetella holmesii</i> 44057                          | bhm  | 0 |
|                      |    |   | <i>Bordetella hinzii</i>                                  | bhz  | 1 |
|                      |    |   | <i>Bordetella trematum</i>                                | btrm | 1 |
|                      |    |   | <i>Bordetella bronchialis</i>                             | bbro | 0 |
|                      |    |   | <i>Bordetella flabilis</i>                                | bfz  | 0 |
|                      |    |   | <i>Bordetella pseudohinzii</i>                            | bpdz | 0 |
|                      |    |   | <i>Bordetella</i> sp. H567                                | boh  | 0 |
|                      |    |   | <i>Bordetella genomosp.</i> 13                            | bgm  | 0 |
|                      |    |   | <i>Bordetella</i> sp. J329                                | boj  | 1 |
| <i>Achromobacter</i> | 10 | 6 | <i>Achromobacter xylosoxidans</i> A8                      | axy  | 4 |
|                      |    |   | <i>Achromobacter xylosoxidans</i> NH44784-1996            | axo  | 1 |
|                      |    |   | <i>Achromobacter xylosoxidans</i> NBRC 15126 = ATCC 27061 | axn  | 1 |
|                      |    |   | <i>Achromobacter xylosoxidans</i> NCTC10807               | axx  | 0 |
|                      |    |   | <i>Achromobacter denitrificans</i>                        | adt  | 0 |
|                      |    |   | <i>Achromobacter insolitus</i>                            | ais  | 0 |
|                      |    |   | <i>Achromobacter spanius</i>                              | asw  | 0 |
|                      |    |   | <i>Achromobacter</i> sp. AONIH1                           | achr | 3 |
|                      |    |   | <i>Achromobacter</i> sp. B7                               | achb | 1 |
|                      |    |   | <i>Achromobacter deleyi</i>                               | ady  | 1 |
| <i>Taylorella</i>    | 5  | 0 | <i>Taylorella equigenitalis</i> MCE9                      | teq  | 0 |
|                      |    |   | <i>Taylorella equigenitalis</i> ATCC 35865                | tea  | 0 |
|                      |    |   | <i>Taylorella equigenitalis</i> 14/56                     | teg  | 0 |
|                      |    |   | <i>Taylorella asinigenitalis</i> MCE3                     | tas  | 0 |
|                      |    |   | <i>Taylorella asinigenitalis</i> 14/45                    | tat  | 0 |
| <i>Pusillimonas</i>  | 3  | 3 | <i>Pusillimonas</i> sp. T7-7                              | put  | 2 |

|                        |   |   |                                        |      |   |
|------------------------|---|---|----------------------------------------|------|---|
|                        |   |   | <i>Pusillimonas thiosulfatoxidans</i>  | pus  | 1 |
|                        |   |   | <i>Pusillimonas</i> sp. DMV24BSW_D     | pud  | 2 |
| <i>Advenella</i>       | 2 | 1 | <i>Advenella kashmirensis</i>          | aka  | 1 |
|                        |   |   | <i>Advenella mimigardefordensis</i>    | amim | 0 |
| <i>Castellaniella</i>  | 1 | 1 | <i>Castellaniella defragrans</i>       | cdn  | 1 |
| <i>Basilea</i>         | 1 | 0 | <i>Basilea psittacipulmonis</i>        | bpsi | 0 |
| <i>Alcaligenes</i>     | 4 | 3 | <i>Alcaligenes faecalis</i> ZD02       | afa  | 0 |
|                        |   |   | <i>Alcaligenes faecalis</i> JQ135      | afq  | 1 |
|                        |   |   | <i>Alcaligenes aquatilis</i>           | aaqu | 1 |
|                        |   |   | <i>Alcaligenes ammonioxydans</i>       | aamm | 1 |
| <i>Paenalcaligenes</i> | 1 | 0 | <i>Paenalcaligenes hominis</i>         | phn  | 0 |
| <i>Orrella</i>         | 2 | 2 | <i>Orrella dioscoreae</i>              | odi  | 1 |
|                        |   |   | <i>Orrella marina</i>                  | boz  | 1 |
| <i>Oligella</i>        | 2 | 1 | <i>Oligella urethralis</i>             | our  | 0 |
|                        |   |   | <i>Oligella ureolytica</i>             | oue  | 1 |
| <i>Pigmentiphaga</i>   | 2 | 1 | <i>Pigmentiphaga</i> sp. H8            | pig  | 3 |
|                        |   |   | <i>Pigmentiphaga aceris</i>            | pacr | 0 |
| <i>Kerstersia</i>      | 1 | 0 | <i>Kerstersia gyiorum</i>              | kgy  | 0 |
| <i>Paralcaligenes</i>  | 1 | 1 | <i>Paralcaligenes</i> sp. KSB-10       | park | 2 |
| <i>Rhodoferrax</i>     | 6 | 3 | <i>Rhodoferrax ferrireducens</i>       | rfr  | 2 |
|                        |   |   | <i>Rhodoferrax saidenbachensis</i>     | rsb  | 0 |
|                        |   |   | <i>Rhodoferrax antarcticus</i>         | rac  | 0 |
|                        |   |   | <i>Rhodoferrax koreense</i>            | rhy  | 0 |
|                        |   |   | <i>Rhodoferrax sediminis</i> CHu59-6-5 | rhf  | 3 |
|                        |   |   | <i>Rhodoferrax sediminis</i> Gr-4      | rhg  | 1 |
| <i>Polaromonas</i>     | 5 | 4 | <i>Polaromonas</i> sp. JS666           | pol  | 4 |
|                        |   |   | <i>Polaromonas naphthalenivorans</i>   | pna  | 1 |
|                        |   |   | <i>Polaromonas</i> sp. SP1             | pos  | 2 |
|                        |   |   | <i>Polaromonas</i> sp. Pch-P           | poo  | 2 |

|                          |    |   |                                     |      |   |
|--------------------------|----|---|-------------------------------------|------|---|
|                          |    |   | <i>Polaromonas vacuolata</i>        | pvac | 0 |
| <i>Acidovorax</i>        | 13 | 6 | <i>Acidovorax citrulli</i>          | aav  | 0 |
|                          |    |   | <i>Acidovorax</i> sp. JS42          | ajs  | 2 |
|                          |    |   | <i>Acidovorax ebreus</i>            | dia  | 1 |
|                          |    |   | <i>Acidovorax avenae</i>            | aaa  | 0 |
|                          |    |   | <i>Acidovorax</i> sp. KKS102        | ack  | 1 |
|                          |    |   | <i>Acidovorax</i> sp. RAC01         | acra | 1 |
|                          |    |   | <i>Acidovorax carolinensis</i> NA2  | acid | 0 |
|                          |    |   | <i>Acidovorax carolinensis</i> P4   | acip | 0 |
|                          |    |   | <i>Acidovorax carolinensis</i> NA3  | acin | 0 |
|                          |    |   | <i>Acidovorax carolinensis</i> P3   | acis | 0 |
|                          |    |   | <i>Acidovorax</i> sp. 1608163       | acio | 1 |
|                          |    |   | <i>Acidovorax monticola</i>         | amon | 0 |
|                          |    |   | <i>Acidovorax antarcticus</i>       | aant | 1 |
| <i>Verminephrobacter</i> | 1  | 0 | <i>Verminephrobacter eiseniae</i>   | vei  | 0 |
| <i>Delftia</i>           | 5  | 3 | <i>Delftia acidovorans</i>          | dac  | 1 |
|                          |    |   | <i>Delftia</i> sp. Cs1-4            | del  | 0 |
|                          |    |   | <i>Delftia tsuruhatensis</i>        | dtb  | 0 |
|                          |    |   | <i>Delftia</i> sp. HK171            | dhk  | 1 |
|                          |    |   | <i>Delftia lacustris</i>            | dla  | 1 |
| <i>Variovorax</i>        | 6  | 6 | <i>Variovorax paradoxus</i> S110    | vap  | 2 |
|                          |    |   | <i>Variovorax paradoxus</i> EPS     | vpe  | 2 |
|                          |    |   | <i>Variovorax paradoxus</i> B4      | vpd  | 3 |
|                          |    |   | <i>Variovorax</i> sp. PAMC 28711    | vaa  | 1 |
|                          |    |   | <i>Variovorax boronicumulans</i>    | vbo  | 1 |
|                          |    |   | <i>Variovorax</i> sp. PMC12         | vam  | 3 |
| <i>Comamonas</i>         | 7  | 5 | <i>Comamonas thiooxydans</i>        | ctt  | 1 |
|                          |    |   | <i>Comamonas testosteroni</i> TK102 | ctes | 3 |
|                          |    |   | <i>Comamonas kerstersii</i>         | cke  | 0 |

|                        |   |   |                                                 |      |   |
|------------------------|---|---|-------------------------------------------------|------|---|
|                        |   |   | <i>Comamonas serinivorans</i>                   | cser | 3 |
|                        |   |   | <i>Comamonas</i> sp. NLF-7-7                    | cof  | 1 |
|                        |   |   | <i>Comamonas aquatica</i>                       | caqt | 0 |
|                        |   |   | <i>Comamonas odontotermitis</i>                 | codo | 1 |
| <i>Alicyciphilus</i>   | 2 | 2 | <i>Alicyciphilus denitrificans</i> BC           | adn  | 1 |
|                        |   |   | <i>Alicyciphilus denitrificans</i> K601         | adk  | 1 |
| <i>Ramlibacter</i>     | 1 | 1 | <i>Ramlibacter tataouinensis</i>                | rta  | 2 |
| <i>Symbiobacter</i>    | 1 | 0 | <i>Candidatus Symbiobacter mobilis</i>          | cbx  | 0 |
| <i>Ottowia</i>         | 2 | 0 | <i>Ottowia</i> sp. oral taxon 894               | oto  | 0 |
|                        |   |   | <i>Ottowia oryzae</i>                           | otk  | 0 |
| <i>Limnohabitans</i>   | 2 | 2 | <i>Limnohabitans</i> sp. 103DPR2                | lim  | 1 |
|                        |   |   | <i>Limnohabitans</i> sp. 63ED37-2               | lih  | 2 |
| <i>Hydrogenophaga</i>  | 6 | 5 | <i>Hydrogenophaga</i> sp. RAC07                 | hyr  | 2 |
|                        |   |   | <i>Hydrogenophaga</i> sp. PBC                   | hyb  | 0 |
|                        |   |   | <i>Hydrogenophaga</i> sp. LPB0072               | hyl  | 1 |
|                        |   |   | <i>Hydrogenophaga</i> sp. PAMC20947             | hyc  | 1 |
|                        |   |   | <i>Hydrogenophaga pseudoflava</i>               | hpse | 2 |
|                        |   |   | <i>Hydrogenophaga</i> sp. BPS33                 | hyn  | 3 |
| <i>Diaphorobacter</i>  | 4 | 1 | <i>Diaphorobacter polyhydroxybutyrativorans</i> | dpy  | 0 |
|                        |   |   | <i>Diaphorobacter</i> sp. HDW4A                 | dih  | 0 |
|                        |   |   | <i>Diaphorobacter aerolatus</i>                 | daer | 0 |
|                        |   |   | <i>Diaphorobacter ruginosibacter</i>            | drg  | 2 |
| <i>Simplicispira</i>   | 1 | 1 | <i>Simplicispira suum</i>                       | simp | 1 |
| <i>Melaminivora</i>    | 3 | 0 | <i>Pulveribacter suum</i>                       | melm | 0 |
|                        |   |   | <i>Melaminivora</i> sp. SC2-9                   | mela | 0 |
|                        |   |   | <i>Melaminivora jejuensis</i>                   | mje  | 0 |
| <i>Serpentinomonas</i> | 2 | 2 | <i>Serpentinomonas raichei</i>                  | cbaa | 1 |
|                        |   |   | <i>Serpentinomonas mccroryi</i>                 | cbab | 1 |
| <i>Schlegelella</i>    | 2 | 2 | <i>Schlegelella thermodepolymerans</i>          | sthm | 3 |

|                          |    |   |                                               |      |   |
|--------------------------|----|---|-----------------------------------------------|------|---|
|                          |    |   | <i>Schlegelella brevitalea</i>                | pbh  | 2 |
| <i>Kinneretia</i>        | 1  | 1 | <i>Kinneretia</i> sp. DAIF2                   | kia  | 2 |
| <i>Methylibium</i>       | 2  | 1 | <i>Methylibium petroleiphilum</i>             | mpt  | 0 |
|                          |    |   | <i>Methylibium</i> sp. Pch-M                  | metp | 1 |
| <i>Herminiimonas</i>     | 1  | 0 | <i>Herminiimonas arsenicoxydans</i>           | har  | 0 |
| <i>Janthinobacterium</i> | 9  | 7 | <i>Janthinobacterium</i> sp. Marseille        | mms  | 0 |
|                          |    |   | <i>Janthinobacterium agaricidamnosum</i>      | jag  | 1 |
|                          |    |   | <i>Janthinobacterium</i> sp. B9-8             | jab  | 0 |
|                          |    |   | <i>Janthinobacterium</i> sp. 1_2014MBL_MicDiv | jaz  | 2 |
|                          |    |   | <i>Janthinobacterium</i> sp. LM6              | jal  | 1 |
|                          |    |   | <i>Janthinobacterium svalbardensis</i>        | jsv  | 1 |
|                          |    |   | <i>Janthinobacterium</i> sp. 17J80-10         | jaj  | 3 |
|                          |    |   | <i>Janthinobacterium tructae</i>              | jas  | 1 |
|                          |    |   | <i>Janthinobacterium lividum</i>              | jlz  | 1 |
| <i>Herbaspirillum</i>    | 7  | 5 | <i>Herbaspirillum seropedicae</i> SmR1        | hse  | 1 |
|                          |    |   | <i>Herbaspirillum seropedicae</i> Z67         | hsz  | 1 |
|                          |    |   | <i>Herbaspirillum hiltneri</i>                | hht  | 0 |
|                          |    |   | <i>Herbaspirillum rubrisubalbicans</i>        | hrb  | 1 |
|                          |    |   | <i>Herbaspirillum</i> sp. meg3                | hee  | 0 |
|                          |    |   | <i>Herbaspirillum huttiense</i>               | hhf  | 1 |
|                          |    |   | <i>Herbaspirillum frisingense</i>             | hfr  | 1 |
| <i>Zinderia</i>          | 1  | 0 | <i>Candidatus Zinderia insecticola</i>        | zin  | 0 |
| <i>Collimonas</i>        | 3  | 3 | <i>Collimonas fungivorans</i>                 | cfu  | 1 |
|                          |    |   | <i>Collimonas arenae</i>                      | care | 1 |
|                          |    |   | <i>Collimonas pratensis</i>                   | cpa  | 2 |
| <i>Massilia</i>          | 10 | 6 | <i>Massilia</i> sp. NR 4-1                    | mnr  | 0 |
|                          |    |   | <i>Massilia</i> sp. WG5                       | masw | 0 |
|                          |    |   | <i>Massilia violaceinigra</i>                 | mass | 0 |
|                          |    |   | <i>Massilia armeniaca</i>                     | masz | 2 |



|                           |   |   |                                                        |      |   |
|---------------------------|---|---|--------------------------------------------------------|------|---|
|                           |   |   | <i>Massilia oculi</i>                                  | mtim | 0 |
|                           |   |   | <i>Massilia</i> sp. YMA4                               | masy | 3 |
|                           |   |   | <i>Massilia albidiflava</i>                            | mali | 2 |
|                           |   |   | <i>Massilia umbonata</i>                               | mum  | 6 |
|                           |   |   | <i>Massilia flava</i>                                  | mfla | 2 |
|                           |   |   | <i>Massilia plicata</i>                                | mpli | 1 |
| <i>Duganella</i>          | 1 | 1 | <i>Duganella</i> sp. AF9R3                             | dug  | 2 |
| <i>Oxalobacter</i>        | 1 | 0 | <i>Oxalobacter formigenes</i>                          | ofa  | 0 |
| <i>Undibacterium</i>      | 2 | 2 | <i>Undibacterium parvum</i>                            | upv  | 2 |
|                           |   |   | <i>Undibacterium piscinae</i>                          | upi  | 1 |
| <i>Noviherbaspirillum</i> | 1 | 1 | <i>Noviherbaspirillum</i> sp. UKPF54                   | nok  | 1 |
| <i>Glaciimonas</i>        | 1 | 1 | <i>Glaciimonas</i> sp. PAMC28666                       | glc  | 1 |
| <i>Sutterella</i>         | 3 | 0 | <i>Sutterella megalosphaeroides</i>                    | sutt | 0 |
|                           |   |   | <i>Sutterella faecalis</i>                             | sutk | 0 |
|                           |   |   | <i>Sutterella wadsworthensis</i>                       | sws  | 0 |
| <i>Leptothrix</i>         | 1 | 1 | <i>Leptothrix cholodnii</i>                            | lch  | 1 |
| <i>Thiomonas</i>          | 2 | 1 | <i>Thiomonas intermedia</i>                            | tin  | 0 |
|                           |   |   | <i>Thiomonas arsenitoxydans</i>                        | thi  | 1 |
| <i>Rubrivivax</i>         | 2 | 1 | <i>Rubrivivax gelatinosus</i>                          | rge  | 1 |
|                           |   |   | <i>Rubrivivax benzoatilyticus</i>                      | rbn  | 0 |
| <i>Roseateles</i>         | 1 | 0 | <i>Roseateles depolymerans</i>                         | rdp  | 0 |
| <i>Paucibacter</i>        | 1 | 0 | <i>Paucibacter</i> sp. KCTC 42545                      | pkt  | 0 |
| <i>Mitsuaria</i>          | 1 | 0 | <i>Mitsuaria</i> sp. 7                                 | miu  | 0 |
| <i>Rhizobacter</i>        | 1 | 1 | <i>Rhizobacter gummiphilus</i>                         | rgu  | 1 |
| <i>Aquabacterium</i>      | 1 | 1 | <i>Aquabacterium olei</i>                              | aon  | 1 |
| <i>Sphaerotilus</i>       | 1 | 1 | <i>Sphaerotilus natans</i> subsp. <i>sulfidivorans</i> | snn  | 2 |
| <i>Xylophilus</i>         | 1 | 0 | <i>Xylophilus rhododendri</i>                          | xyk  | 0 |
| <i>Tepidimonas</i>        | 1 | 0 | <i>Tepidimonas taiwanensis</i>                         | ttw  | 0 |
| <i>Ideonella</i>          | 1 | 1 | <i>Ideonella dechloratans</i>                          | idc  | 1 |

|                                         |   |   |                                               |      |   |
|-----------------------------------------|---|---|-----------------------------------------------|------|---|
| <i>unclassified<br/>Burkholderiales</i> | 2 | 1 | <i>Burkholderiales bacterium</i> GJ-E10       | bbag | 1 |
|                                         |   |   | <i>Burkholderiales bacterium</i> YL45         | bbay | 0 |
| <i>Nitrosomonas</i>                     | 7 | 3 | <i>Nitrosomonas europaea</i>                  | neu  | 0 |
|                                         |   |   | <i>Nitrosomonas eutropha</i>                  | net  | 0 |
|                                         |   |   | <i>Nitrosomonas</i> sp. AL212                 | nit  | 1 |
|                                         |   |   | <i>Nitrosomonas</i> sp. Is79A3                | nii  | 1 |
|                                         |   |   | <i>Nitrosomonas communis</i>                  | nco  | 1 |
|                                         |   |   | <i>Nitrosomonas ureae</i>                     | nur  | 0 |
|                                         |   |   | <i>Nitrosomonas stercoris</i>                 | nst  | 0 |
| <i>Nitrospira</i>                       | 2 | 2 | <i>Nitrospira multiformis</i>                 | nmu  | 1 |
|                                         |   |   | <i>Nitrospira lacus</i>                       | nlc  | 1 |
| <i>Sulfuritalea</i>                     | 1 | 0 | <i>Sulfuritalea hydrogenivorans</i>           | shd  | 0 |
| <i>Methyloversatilis</i>                | 1 | 1 | <i>Methyloversatilis</i> sp. RAC08            | metr | 1 |
| <i>Denitratisoma</i>                    | 1 | 1 | <i>Denitratisoma oestradiolicum</i>           | doe  | 2 |
| <i>Thiobacillus</i>                     | 1 | 0 | <i>Thiobacillus denitrificans</i>             | tbd  | 0 |
| <i>Methylobacillus</i>                  | 1 | 1 | <i>Methylobacillus flagellatus</i>            | mfa  | 1 |
| <i>Methylothena</i>                     | 2 | 0 | <i>Methylothena mobilis</i>                   | mmb  | 0 |
|                                         |   |   | <i>Methylothena versatilis</i>                | meh  | 0 |
| <i>Methylovorus</i>                     | 2 | 0 | <i>Methylovorus glucosetrophus</i>            | mei  | 0 |
|                                         |   |   | <i>Methylovorus</i> sp. MP688                 | mep  | 0 |
| <i>Methylopumilus</i>                   | 2 | 1 | <i>Candidatus Methylopumilus turicensis</i>   | mbac | 1 |
|                                         |   |   | <i>Candidatus Methylopumilus planktonicus</i> | mbat | 0 |
| <i>Methylophilus</i>                    | 1 | 1 | <i>Methylophilus</i> sp. TWE2                 | meu  | 1 |
| <i>Methylophilus</i>                    | 1 | 1 | <i>Methylophilus palustris</i>                | mpau | 1 |
| <i>Sideroxydans</i>                     | 1 | 0 | <i>Sideroxydans lithotrophicus</i>            | slt  | 0 |
| <i>Gallionella</i>                      | 1 | 0 | <i>Gallionella capsiferiformans</i>           | gca  | 0 |
| <i>Ferriphaselus</i>                    | 1 | 0 | <i>Ferriphaselus amnicola</i>                 | fam  | 0 |
| <i>Nitrotoga</i>                        | 1 | 0 | <i>Candidatus Nitrotoga</i> sp. AM1P          | nim  | 0 |

|                                       |   |   |                                                      |      |   |
|---------------------------------------|---|---|------------------------------------------------------|------|---|
| <i>Ferrigenium</i>                    | 1 | 0 | <i>Ferrigenium kumadai</i>                           | fku  | 0 |
| <i>Sulfuricella</i>                   | 1 | 0 | <i>Sulfuricella denitrificans</i>                    | sdr  | 0 |
| <i>Sulfuriferula</i>                  | 3 | 0 | <i>Sulfuriferula</i> sp. AH1                         | sulf | 0 |
|                                       |   |   | <i>Sulfuriferula plumbiphila</i>                     | splb | 0 |
|                                       |   |   | <i>Sulfuriferula nivalis</i>                         | sniv | 0 |
| <i>Sulfurimicrobium</i>               | 1 | 0 | <i>Sulfurimicrobium lacus skT11</i>                  | slac | 0 |
| <i>Usitatibacter</i>                  | 2 | 0 | <i>Usitatibacter rugosus</i>                         | uru  | 0 |
|                                       |   |   | <i>Usitatibacter palustris</i>                       | upl  | 0 |
| <i>Azospira</i>                       | 3 | 0 | <i>Azospira oryzae</i>                               | dsu  | 0 |
|                                       |   |   | <i>Azospira restricta</i>                            | ares | 0 |
|                                       |   |   | <i>Azospira inquinata</i>                            | aiq  | 0 |
| <i>Rugosibacter</i>                   | 1 | 0 | <i>Rugosibacter aromaticivorans</i>                  | rbu  | 0 |
| <i>Oryzomicrobium</i>                 | 1 | 0 | <i>Oryzomicrobium terrae</i>                         | otr  | 0 |
| <i>Niveibacterium</i>                 | 1 | 0 | <i>Niveibacterium microcysteis</i>                   | niv  | 0 |
| <i>Aromatoleum</i>                    | 4 | 3 | <i>Aromatoleum aromaticum</i>                        | eba  | 2 |
|                                       |   |   | <i>Aromatoleum bremense</i>                          | abre | 0 |
|                                       |   |   | <i>Aromatoleum petrolei</i>                          | apet | 3 |
|                                       |   |   | <i>Aromatoleum pumilum</i>                           | atw  | 1 |
| unclassified<br><i>Rhodocyclaceae</i> | 1 | 0 | <i>Rhodocyclaceae</i> bacterium <i>Thauera</i> -like | rbh  | 0 |
| <i>Dechloromonas</i>                  | 2 | 0 | <i>Dechloromonas aromatica</i>                       | dar  | 0 |
|                                       |   |   | <i>Dechloromonas</i> sp. HYN0024                     | dey  | 0 |
| <i>Quatrionicoccus</i>                | 1 | 0 | <i>Quatrionicoccus australiensis</i>                 | qau  | 0 |
| <i>Ferribacterium</i>                 | 1 | 0 | <i>Ferribacterium limneticum</i>                     | fle  | 0 |
| <i>Azoarcus</i>                       | 7 | 5 | <i>Azoarcus olearius</i> BH72                        | azo  | 1 |
|                                       |   |   | <i>Azoarcus olearius</i> DQS4                        | aoa  | 1 |
|                                       |   |   | <i>Azoarcus</i> sp. KH32C                            | aza  | 0 |
|                                       |   |   | <i>Azoarcus</i> sp. CIB                              | azi  | 1 |
|                                       |   |   | <i>Azoarcus communis</i>                             | acom | 2 |

|                                  |   |   |                                                                                           |      |   |
|----------------------------------|---|---|-------------------------------------------------------------------------------------------|------|---|
|                                  |   |   | <i>Azoarcus</i> sp. DN11                                                                  | azd  | 3 |
|                                  |   |   | <i>Azoarcus</i> sp. DD4                                                                   | azr  | 0 |
| <i>Thauera</i>                   | 5 | 4 | <i>Thauera</i> sp. MZ1T                                                                   | tmz  | 1 |
|                                  |   |   | <i>Thauera humireducens</i>                                                               | thu  | 0 |
|                                  |   |   | <i>Thauera chlorobenzoica</i>                                                             | tcl  | 1 |
|                                  |   |   | <i>Thauera</i> sp. K11                                                                    | thk  | 2 |
|                                  |   |   | <i>Thauera aromatica</i>                                                                  | tak  | 1 |
| <i>Nitrogeniibacter</i>          | 1 | 0 | <i>Nitrogeniibacter mangrovi</i>                                                          | azq  | 0 |
| <i>unclassified Zoogloeaceae</i> | 1 | 0 | <i>Zoogloeaceae</i> bacteirum Par-f-2                                                     | zpa  | 0 |
| <i>Fluviibacter</i>              | 1 | 0 | <i>Fluviibacter phosphoraccumulans</i>                                                    | fpho | 0 |
| <i>Ferrovum</i>                  | 1 | 0 | <i>Ferrovum myxofaciens</i>                                                               | fmy  | 0 |
| <i>Accumulibacter</i>            | 1 | 0 | <i>Accumulibacter phosphatis</i>                                                          | app  | 0 |
| <i>Tremblaya</i>                 | 3 | 0 | <i>Candidatus Tremblaya princeps</i> PCIT                                                 | tpn  | 0 |
|                                  |   |   | <i>Candidatus Tremblaya princeps</i> PCVAL                                                | tpq  | 0 |
|                                  |   |   | <i>Candidatus Tremblaya phenacola</i>                                                     | tpj  | 0 |
| <i>Kinetoplastibacterium</i>     | 8 | 0 | <i>Candidatus Kinetoplastibacterium crithidii</i> (ex <i>Angomonas deanei</i> ATCC 30255) | kci  | 0 |
|                                  |   |   | <i>Candidatus Kinetoplastibacterium crithidii</i> TCC036E                                 | kct  | 0 |
|                                  |   |   | <i>Candidatus Kinetoplastibacterium blastocrithidii</i> (ex <i>Strigomonas culicis</i> )  | kbl  | 0 |
|                                  |   |   | <i>Candidatus Kinetoplastibacterium blastocrithidii</i> TCC012E                           | kbt  | 0 |
|                                  |   |   | <i>Candidatus Kinetoplastibacterium desouzaai</i>                                         | kde  | 0 |
|                                  |   |   | <i>Candidatus Kinetoplastibacterium galatii</i>                                           | kga  | 0 |
|                                  |   |   | <i>Candidatus Kinetoplastibacterium oncopeltii</i>                                        | kon  | 0 |
|                                  |   |   | <i>Candidatus Kinetoplastibacterium sorsogonicusi</i>                                     | kso  | 0 |
| <i>Profftella</i>                | 1 | 0 | <i>Candidatus Profftella armatura</i>                                                     | ssdc | 0 |
| <i>Nasuia</i>                    | 1 | 0 | <i>Candidatus Nasuia deltocephalinicola</i>                                               | ndl  | 0 |
| <i>Vidania</i>                   | 1 | 0 | <i>Candidatus Vidania fulgoroideae</i>                                                    | vfg  | 0 |
| <i>Desulfobacillus</i>           | 1 | 0 | <i>Candidatus Desulfobacillus denitrificans</i>                                           | ddz  | 0 |

|                                    |   |   |                                             |      |   |
|------------------------------------|---|---|---------------------------------------------|------|---|
| unclassified<br>Betaproteobacteria | 3 | 0 | <i>Beta proteobacterium</i> CB              | bprc | 0 |
|                                    |   |   | <i>Betaproteobacteria bacterium</i> UKL13-2 | beb  | 0 |
| 137                                |   |   | <i>Betaproteobacteria bacterium</i> GR16-43 | beba | 0 |

#### *Deltaproteobacteria*

| Genus                   | Number of species | Number of species having P450s | Species name                          | Species codes | Number of p450s |
|-------------------------|-------------------|--------------------------------|---------------------------------------|---------------|-----------------|
| <i>Geobacter</i>        | 7                 |                                | <i>Geobacter sulfurreducens</i> PCA   | gsu           | 0               |
|                         |                   |                                | <i>Geobacter sulfurreducens</i> KN400 | gsk           | 0               |
|                         |                   |                                | <i>Geobacter metallireducens</i>      | gme           | 0               |
|                         |                   |                                | <i>Geobacter</i> sp. M21              | gem           | 0               |
|                         |                   |                                | <i>Geobacter</i> sp. M18              | geb           | 0               |
|                         |                   |                                | <i>Geobacter pickeringii</i>          | gpi           | 0               |
|                         |                   |                                | <i>Geobacter anodireducens</i>        | gao           | 0               |
| <i>Geotalea</i>         | 2                 |                                | <i>Geobacter uraniireducens</i>       | gur           | 0               |
|                         |                   |                                | <i>Geobacter daltonii</i> FRC-32      | geo           | 0               |
| <i>Trichlorobacter</i>  | 1                 |                                | <i>Trichlorobacter lovleyi</i>        | glo           | 0               |
| <i>Citri fermentans</i> | 2                 |                                | <i>Citri fermentans bemidjiense</i>   | gbm           | 0               |
|                         |                   |                                | <i>Citri fermentans bremense</i>      | gbn           | 0               |
| <i>Geoalkalibacter</i>  | 1                 |                                | <i>Geoalkalibacter subterraneus</i>   | gsb           | 0               |

|                            |    |   |                                                             |      |   |
|----------------------------|----|---|-------------------------------------------------------------|------|---|
| <i>Geomonas</i>            | 3  |   | <i>Geomonas oryzae</i>                                      | ger  | 0 |
|                            |    |   | <i>Geomonas subterranea</i>                                 | gsub | 0 |
|                            |    |   | <i>Geomonas nitrogenifigens</i>                             | gnt  | 0 |
| <i>Syntrophotalea</i>      | 3  |   | <i>Pelobacter carbinolicus</i>                              | pca  | 0 |
|                            |    |   | <i>Syntrophotalea acetylenica</i>                           | pace | 0 |
|                            |    |   | <i>Syntrophotalea acetylenivorans</i>                       | pef  | 0 |
| <i>Pelobacter</i>          | 1  |   | <i>Pelobacter propionicus</i>                               | ppd  | 0 |
| <i>Desulfuromonas</i>      | 3  |   | <i>Desulfuromonas soudanensis</i>                           | des  | 0 |
|                            |    |   | <i>Desulfuromonas</i> sp. DDH964                            | deu  | 0 |
|                            |    |   | <i>Desulfuromonas versatilis</i>                            | dve  | 0 |
| <i>Desulfovibrio</i>       | 11 |   | <i>Desulfovibrio vulgaris</i> Hildenborough                 | dvu  | 0 |
|                            |    |   | <i>Desulfovibrio vulgaris</i> DP4                           | dvl  | 0 |
|                            |    |   | <i>Desulfovibrio vulgaris</i> Miyazaki F                    | dvm  | 0 |
|                            |    |   | <i>Desulfovibrio vulgaris</i> RCH1                          | dvg  | 0 |
|                            |    |   | <i>Desulfovibrio desulfuricans</i> ATCC 27774               | dds  | 0 |
|                            |    |   | <i>Desulfovibrio fairfieldensis</i>                         | dfi  | 0 |
|                            |    |   | <i>Desulfovibrio piger</i>                                  | dpg  | 0 |
|                            |    |   | <i>Desulfovibrio</i> sp. G11                                | def  | 0 |
|                            |    |   | <i>Candidatus Desulfovibrio trichonymphae</i>               | dtr  | 0 |
|                            |    |   | <i>Desulfovibrio ferrophilus</i>                            | dfl  | 0 |
|                            |    |   | <i>Desulfovibrio sulfodismutans</i>                         | dsd  | 0 |
| <i>Solidesulfovibrio</i>   | 2  |   | <i>Solidesulfovibrio magneticus</i>                         | dma  | 0 |
|                            |    |   | <i>Solidesulfovibrio carbinolicus</i>                       | dcb  | 0 |
| <i>Megalodesulfovibrio</i> | 1  |   | <i>Megalodesulfovibrio gigas</i>                            | dgg  | 0 |
| <i>Oleidesulfovibrio</i>   | 1  |   | <i>Oleidesulfovibrio alaskensis</i>                         | dde  | 0 |
| <i>Oceanidesulfovibrio</i> | 1  |   | <i>Oceanidesulfovibrio marinus</i>                          | dms  | 0 |
| <i>Maridesulfovibrio</i>   | 2  |   | <i>Maridesulfovibrio salexigens</i>                         | dsa  | 0 |
|                            |    |   | <i>Desulfovibrio hydrothermalis</i>                         | dhy  | 0 |
| <i>Desulfocurvibacter</i>  | 1  | 1 | <i>Desulfocurvibacter africanus</i> subsp. <i>africanus</i> | daf  | 1 |

|                            |   |  |                                                     |      |   |
|----------------------------|---|--|-----------------------------------------------------|------|---|
| <i>Pseudodesulfovibrio</i> | 6 |  | <i>Pseudodesulfovibrio aespoeensis</i>              | das  | 0 |
|                            |   |  | <i>Pseudodesulfovibrio piezophilus</i>              | dpi  | 0 |
|                            |   |  | <i>Pseudodesulfovibrio indicus</i>                  | dej  | 0 |
|                            |   |  | <i>Pseudodesulfovibrio profundus</i>                | pprf | 0 |
|                            |   |  | <i>Pseudodesulfovibrio cashew</i>                   | psel | 0 |
|                            |   |  | <i>Pseudodesulfovibrio mercurii</i>                 | ddn  | 0 |
| <i>Lawsonia</i>            | 2 |  | <i>Lawsonia intracellularis</i> PHE/MN1-00          | lip  | 0 |
|                            |   |  | <i>Lawsonia intracellularis</i> N343                | lir  | 0 |
| <i>Desulfolutivibrio</i>   | 1 |  | <i>Desulfolutivibrio sulfoxidireducens</i>          | dsx  | 0 |
| <i>Paradesulfovibrio</i>   | 1 |  | <i>Paradesulfovibrio bizertensis</i>                | pbiz | 0 |
| <i>Desulfomicrobium</i>    | 2 |  | <i>Desulfomicrobium baculatum</i>                   | dba  | 0 |
|                            |   |  | <i>Desulfomicrobium orale</i>                       | doa  | 0 |
| <i>Desulfohalobium</i>     | 1 |  | <i>Desulfohalobium retbaense</i>                    | drt  | 0 |
| <i>Desulfotalea</i>        | 1 |  | <i>Desulfotalea psychrophila</i>                    | dps  | 0 |
| <i>Desulfocapsa</i>        | 1 |  | <i>Desulfocapsa sulfexigens</i>                     | dsf  | 0 |
| <i>Desulfurivibrio</i>     | 1 |  | <i>Desulfurivibrio alkaliphilus</i>                 | dak  | 0 |
| <i>Desulfobulbus</i>       | 3 |  | <i>Desulfobulbus propionicus</i>                    | dpr  | 0 |
|                            |   |  | <i>Desulfobulbus oralis</i>                         | deo  | 0 |
|                            |   |  | <i>Desulfobulbus oligotrophicus</i>                 | dog  | 0 |
| <i>Desulfomarina</i>       | 1 |  | <i>Desulfomarina profundus</i>                      | dbk  | 0 |
| <i>Desulfococcus</i>       | 2 |  | <i>Desulfococcus oleovorans</i>                     | dol  | 0 |
|                            |   |  | <i>Desulfococcus multivorans</i>                    | dml  | 0 |
| <i>Desulfatibacillum</i>   | 1 |  | <i>Desulfatibacillum aliphaticivorans</i>           | dal  | 0 |
| <i>Desulforapulum</i>      | 1 |  | <i>Desulforapulum autotrophicum</i>                 | dat  | 0 |
| <i>Desulfobacula</i>       | 1 |  | <i>Desulfobacula toluolica</i>                      | dto  | 0 |
| <i>Desulfosarcina</i>      | 3 |  | <i>Desulfosarcina ovata</i> subsp. <i>sediminis</i> | dov  | 0 |
|                            |   |  | <i>Desulfosarcina widdelii</i>                      | dwd  | 0 |
|                            |   |  | <i>Desulfosarcina alkanivorans</i>                  | dalk | 0 |
| <i>Desulfonema</i>         | 2 |  | <i>Desulfonema limicola</i>                         | dli  | 0 |

|                         |   |   |                                            |      |    |
|-------------------------|---|---|--------------------------------------------|------|----|
|                         |   |   | <i>Desulfonema magnum</i>                  | dmm  | 0  |
| <i>Desulfoluna</i>      | 1 |   | <i>Desulfoluna</i> sp. ASN36               | dek  | 0  |
| <i>Anaeromyxobacter</i> | 4 |   | <i>Anaeromyxobacter dehalogenans</i> 2CP-C | ade  | 0  |
|                         |   |   | <i>Anaeromyxobacter dehalogenans</i> 2CP-1 | acp  | 0  |
|                         |   |   | <i>Anaeromyxobacter</i> sp. Fw109-5        | afw  | 0  |
|                         |   |   | <i>Anaeromyxobacter</i> sp. K              | ank  | 0  |
| <i>Myxococcus</i>       | 4 | 4 | <i>Myxococcus xanthus</i>                  | mxs  | 7  |
|                         |   |   | <i>Myxococcus stipitatus</i>               | msd  | 11 |
|                         |   |   | <i>Myxococcus hansupus</i>                 | mym  | 4  |
|                         |   |   | <i>Myxococcus fulvus</i>                   | mfb  | 2  |
| <i>Corallococcus</i>    | 3 | 4 | <i>Corallococcus coralloides</i>           | ccx  | 10 |
|                         |   |   | <i>Corallococcus macrosporus</i> HW-1      | mfu  | 2  |
|                         |   |   | <i>Corallococcus macrosporus</i> DSM 14697 | mmas | 1  |
| <i>Stigmatella</i>      | 1 | 1 | <i>Stigmatella aurantiaca</i>              | sur  | 17 |
| <i>Archangium</i>       | 2 | 2 | <i>Archangium gephyra</i>                  | age  | 56 |
|                         |   |   | <i>Archangium violaceum</i>                | avm  | 43 |
| <i>Melittangium</i>     | 1 | 1 | <i>Melittangium boletus</i>                | mbd  | 28 |
| <i>Cystobacter</i>      | 1 | 1 | <i>Cystobacter fuscus</i>                  | cfus | 42 |
| <i>Vulгатibacter</i>    | 1 |   | <i>Vulгатibacter incomptus</i>             | vin  | 0  |
| <i>Sorangium</i>        | 2 | 2 | <i>Sorangium cellulosum</i> So ce56        | scl  | 19 |
|                         |   |   | <i>Sorangium cellulosum</i> So0157-2       | scu  | 8  |
| <i>Chondromyces</i>     | 1 | 1 | <i>Chondromyces crocatus</i>               | ccro | 26 |
| <i>Sandaracinus</i>     | 1 | 1 | <i>Sandaracinus amylolyticus</i>           | samy | 6  |
| <i>Labilithrix</i>      | 1 | 1 | <i>Labilithrix luteola</i>                 | llu  | 5  |
| <i>Minicystis</i>       | 1 | 1 | <i>Minicystis rosea</i>                    | mrn  | 24 |
| <i>Haliangium</i>       | 1 | 1 | <i>Haliangium ochraceum</i>                | hoh  | 17 |
| <i>Syntrophus</i>       | 1 |   | <i>Syntrophus aciditrophicus</i>           | sat  | 0  |
| <i>Desulfobacca</i>     | 1 |   | <i>Desulfobacca acetoxidans</i>            | dao  | 0  |
| <i>Desulfomonile</i>    | 1 |   | <i>Desulfomonile tiedjei</i>               | dti  | 0  |



|                        |   |   |                                     |      |   |
|------------------------|---|---|-------------------------------------|------|---|
| <i>Syntrophobacter</i> | 1 |   | <i>Syntrophobacter fumaroxidans</i> | sfu  | 0 |
| <i>Desulfoglaeba</i>   | 1 |   | <i>Desulfoglaeba alkanexedens</i>   | dax  | 0 |
| <i>Desulfarculus</i>   | 1 |   | <i>Desulfarculus baarsii</i>        | dbr  | 0 |
| <i>Hipaea</i>          | 1 |   | <i>Hipaea maritima</i>              | hmr  | 0 |
| <i>Desulfurella</i>    | 1 |   | <i>Desulfurella acetivorans</i>     | dav  | 0 |
| <i>Bradymonas</i>      | 1 | 1 | <i>Bradymonas sediminis</i>         | bsed | 1 |
| <i>Persicimonas</i>    | 1 | 1 | <i>Persicimonas caeni</i>           | pcay | 3 |

*Epsilonproteobacteria*

| Genus               | Number of species | Number of species having P450s | Species name                      | Species code | Number of p450s |
|---------------------|-------------------|--------------------------------|-----------------------------------|--------------|-----------------|
| <i>Helicobacter</i> | 78                | 1                              | <i>Helicobacter pylori</i> 26695  | hpy          | 0               |
|                     |                   |                                | <i>Helicobacter pylori</i> 26695  | heo          | 0               |
|                     |                   |                                | <i>Helicobacter pylori</i> J99    | hpi          | 0               |
|                     |                   |                                | <i>Helicobacter pylori</i> HPAG1  | hpa          | 0               |
|                     |                   |                                | <i>Helicobacter pylori</i> Shi470 | hps          | 0               |
|                     |                   |                                | <i>Helicobacter pylori</i> Shi112 | hhp          | 0               |
|                     |                   |                                | <i>Helicobacter pylori</i> Shi169 | hhq          | 0               |
|                     |                   |                                | <i>Helicobacter pylori</i> Shi417 | hhr          | 0               |
|                     |                   |                                | <i>Helicobacter pylori</i> G27    | hpg          | 0               |

|  |  |  |                                          |      |   |
|--|--|--|------------------------------------------|------|---|
|  |  |  | <i>Helicobacter pylori</i> P12           | hpp  | 0 |
|  |  |  | <i>Helicobacter pylori</i> B38           | hpb  | 0 |
|  |  |  | <i>Helicobacter pylori</i> B8            | hpl  | 0 |
|  |  |  | <i>Helicobacter pylori</i> PeCan4        | hpc  | 0 |
|  |  |  | <i>Helicobacter pylori</i> PeCan18       | hca  | 0 |
|  |  |  | <i>Helicobacter pylori</i> SJM180        | hpm  | 0 |
|  |  |  | <i>Helicobacter pylori</i> ELS37         | hpe  | 0 |
|  |  |  | <i>Helicobacter pylori</i> 35A           | hpo  | 0 |
|  |  |  | <i>Helicobacter pylori</i> 908           | hpi  | 0 |
|  |  |  | <i>Helicobacter pylori</i> 2017          | hpq  | 0 |
|  |  |  | <i>Helicobacter pylori</i> 2018          | hpw  | 0 |
|  |  |  | <i>Helicobacter pylori</i> Cuz20         | hpu  | 0 |
|  |  |  | <i>Helicobacter pylori</i> F16           | hef  | 0 |
|  |  |  | <i>Helicobacter pylori</i> F30           | hpf  | 0 |
|  |  |  | <i>Helicobacter pylori</i> F32           | heq  | 0 |
|  |  |  | <i>Helicobacter pylori</i> F57           | hex  | 0 |
|  |  |  | <i>Helicobacter pylori</i> Sat464        | hpt  | 0 |
|  |  |  | <i>Helicobacter pylori</i> 52            | hpz  | 0 |
|  |  |  | <i>Helicobacter pylori</i> v225d         | hpu  | 0 |
|  |  |  | <i>Helicobacter pylori</i> 83            | hpx  | 0 |
|  |  |  | <i>Helicobacter pylori</i> SNT49         | hen  | 0 |
|  |  |  | <i>Helicobacter pylori</i> Lithuania75   | hph  | 0 |
|  |  |  | <i>Helicobacter pylori</i> Gambia94/24   | heg  | 0 |
|  |  |  | <i>Helicobacter pylori</i> India7        | hpn  | 0 |
|  |  |  | <i>Helicobacter pylori</i> Puno120       | hep  | 0 |
|  |  |  | <i>Helicobacter pylori</i> Puno135       | heu  | 0 |
|  |  |  | <i>Helicobacter pylori</i> SouthAfrica7  | hes  | 0 |
|  |  |  | <i>Helicobacter pylori</i> SouthAfrica20 | hpys | 0 |
|  |  |  | <i>Helicobacter pylori</i> HUP-B14       | hcn  | 0 |

|  |  |  |                                         |      |   |
|--|--|--|-----------------------------------------|------|---|
|  |  |  | <i>Helicobacter pylori</i> 51           | hpd  | 0 |
|  |  |  | <i>Helicobacter pylori</i> XZ274        | hey  | 0 |
|  |  |  | <i>Helicobacter pylori</i> Rif1         | her  | 0 |
|  |  |  | <i>Helicobacter pylori</i> Rif2         | hei  | 0 |
|  |  |  | <i>Helicobacter pylori</i> Aklavik117   | hpya | 0 |
|  |  |  | <i>Helicobacter pylori</i> Aklavik86    | hpyk | 0 |
|  |  |  | <i>Helicobacter pylori</i> OK113        | hpyo | 0 |
|  |  |  | <i>Helicobacter pylori</i> OK310        | hpyl | 0 |
|  |  |  | <i>Helicobacter pylori</i> oki102       | hpyb | 0 |
|  |  |  | <i>Helicobacter pylori</i> oki112       | hpyc | 0 |
|  |  |  | <i>Helicobacter pylori</i> oki128       | hpyd | 0 |
|  |  |  | <i>Helicobacter pylori</i> oki154       | hpye | 0 |
|  |  |  | <i>Helicobacter pylori</i> oki422       | hpyf | 0 |
|  |  |  | <i>Helicobacter pylori</i> oki673       | hpyg | 0 |
|  |  |  | <i>Helicobacter pylori</i> oki828       | hpyh | 0 |
|  |  |  | <i>Helicobacter pylori</i> oki898       | hpyj | 0 |
|  |  |  | <i>Helicobacter pylori</i> UM032        | hpyr | 0 |
|  |  |  | <i>Helicobacter pylori</i> UM037        | hpyi | 0 |
|  |  |  | <i>Helicobacter pylori</i> UM066        | hpyu | 0 |
|  |  |  | <i>Helicobacter pylori</i> UM299        | hpym | 0 |
|  |  |  | <i>Helicobacter pylori</i> UM298        | hem  | 0 |
|  |  |  | <i>Helicobacter pylori</i> BM012A       | heb  | 0 |
|  |  |  | <i>Helicobacter pylori</i> BM012S       | hez  | 0 |
|  |  |  | <i>Helicobacter hepaticus</i>           | hhe  | 0 |
|  |  |  | <i>Helicobacter acinonychis</i>         | hac  | 0 |
|  |  |  | <i>Helicobacter mustelae</i>            | hms  | 0 |
|  |  |  | <i>Helicobacter felis</i>               | hfe  | 0 |
|  |  |  | <i>Helicobacter bizzozeronii</i>        | hbi  | 0 |
|  |  |  | <i>Helicobacter cetorum</i> MIT 00-7128 | hce  | 0 |

|                      |    |    |                                                                           |      |   |
|----------------------|----|----|---------------------------------------------------------------------------|------|---|
|                      |    |    | <i>Helicobacter cetorum</i> MIT 99-5656                                   | hcm  | 0 |
|                      |    |    | <i>Helicobacter cinaedi</i> PAGU611                                       | hcp  | 0 |
|                      |    |    | <i>Helicobacter cinaedi</i> CCUG 18818 = ATCC BAA-847                     | hcb  | 0 |
|                      |    |    | <i>Helicobacter heilmannii</i>                                            | hhm  | 0 |
|                      |    |    | <i>Helicobacter typhlonius</i>                                            | hty  | 0 |
|                      |    |    | <i>Helicobacter bilis</i>                                                 | hbl  | 0 |
|                      |    |    | <i>Helicobacter apodemus</i>                                              | had  | 0 |
|                      |    |    | <i>Helicobacter enhydrae</i>                                              | het  | 0 |
|                      |    |    | <i>Helicobacter cholecystus</i>                                           | hcl  | 0 |
|                      |    |    | <i>Helicobacter winghamensis</i>                                          | hwi  | 1 |
|                      |    |    | <i>Helicobacter suis</i>                                                  | hsh  | 0 |
| <i>Wolinella</i>     | 1  | 1  | <i>Wolinella succinogenes</i>                                             | wsu  | 0 |
| <i>Sulfurimonas</i>  | 9  | 9  | <i>Sulfurimonas denitrificans</i>                                         | tdn  | 0 |
|                      |    |    | <i>Sulfurimonas autotrophica</i>                                          | sua  | 0 |
|                      |    |    | <i>Sulfurimonas xiamenensis</i>                                           | suln | 0 |
|                      |    |    | <i>Sulfurimonas lithotrophica</i>                                         | sulg | 0 |
|                      |    |    | <i>Sulfurimonas</i> sp. CVO                                               | sulc | 0 |
|                      |    |    | <i>Sulfurimonas paralvinellae</i>                                         | spal | 0 |
|                      |    |    | <i>Sulfurimonas sediminis</i>                                             | ssei | 0 |
|                      |    |    | <i>Candidatus Sulfurimonas baltica</i>                                    | sbal | 0 |
|                      |    |    | <i>Candidatus Sulfurimonas marisnigri</i>                                 | smas | 0 |
| <i>Sulfuricurvum</i> | 2  | 2  | <i>Sulfuricurvum kujiense</i>                                             | sku  | 0 |
|                      |    |    | <i>Candidatus Sulfuricurvum</i> sp. RIFRC-1                               | sulr | 0 |
| <i>Campylobacter</i> | 78 | 51 | <i>Campylobacter jejuni</i> subsp. <i>jejuni</i> NCTC 11168 = ATCC 700819 | cje  | 1 |
|                      |    |    | <i>Campylobacter jejuni</i> subsp. <i>jejuni</i> NCTC 11168-BN148         | cjb  | 1 |
|                      |    |    | <i>Campylobacter jejuni</i> subsp. <i>jejuni</i> 81-176                   | cjj  | 1 |
|                      |    |    | <i>Campylobacter jejuni</i> subsp. <i>jejuni</i> 81116                    | cju  | 1 |

|  |  |  |                                                                |      |   |
|--|--|--|----------------------------------------------------------------|------|---|
|  |  |  | <i>Campylobacter jejuni</i> subsp. <i>jejuni</i> ICDCCJ07001   | cjn  | 1 |
|  |  |  | <i>Campylobacter jejuni</i> subsp. <i>jejuni</i> IA3902        | cji  | 1 |
|  |  |  | <i>Campylobacter jejuni</i> subsp. <i>jejuni</i> M1            | cjm  | 1 |
|  |  |  | <i>Campylobacter jejuni</i> subsp. <i>jejuni</i> S3            | cjs  | 1 |
|  |  |  | <i>Campylobacter jejuni</i> subsp. <i>jejuni</i> PT14          | cjp  | 1 |
|  |  |  | <i>Campylobacter jejuni</i> subsp. <i>jejuni</i> 00-2426       | cjej | 1 |
|  |  |  | <i>Campylobacter jejuni</i> subsp. <i>jejuni</i> 00-2538       | cjeu | 1 |
|  |  |  | <i>Campylobacter jejuni</i> subsp. <i>jejuni</i> 00-2544       | cjen | 1 |
|  |  |  | <i>Campylobacter jejuni</i> subsp. <i>jejuni</i> 00-2425       | cjei | 1 |
|  |  |  | <i>Campylobacter jejuni</i> subsp. <i>jejuni</i> R14           | cjer | 1 |
|  |  |  | <i>Campylobacter jejuni</i> subsp. <i>jejuni</i> MTVDSCj20     | cjv  | 1 |
|  |  |  | <i>Campylobacter jejuni</i> subsp. <i>jejuni</i> YH001         | cjy  | 0 |
|  |  |  | <i>Campylobacter jejuni</i> subsp. <i>jejuni</i> 35925B2       | cjq  | 0 |
|  |  |  | <i>Campylobacter jejuni</i> subsp. <i>jejuni</i> 00-1597       | cjl  | 1 |
|  |  |  | <i>Campylobacter jejuni</i> subsp. <i>jejuni</i> 00-6200       | cjw  | 1 |
|  |  |  | <i>Campylobacter jejuni</i> RM1221                             | cjr  | 1 |
|  |  |  | <i>Campylobacter jejuni</i> subsp. <i>doylei</i> 269.97        | cjd  | 1 |
|  |  |  | <i>Campylobacter jejuni</i> 32488                              | cjz  | 1 |
|  |  |  | <i>Campylobacter jejuni</i> 4031                               | cjx  | 1 |
|  |  |  | <i>Campylobacter fetus</i> subsp. <i>fetus</i> 82-40           | cff  | 0 |
|  |  |  | <i>Campylobacter fetus</i> subsp. <i>fetus</i> 04/554          | cft  | 0 |
|  |  |  | <i>Campylobacter fetus</i> subsp. <i>venerealis</i> cfvi03/293 | cfv  | 0 |
|  |  |  | <i>Campylobacter fetus</i> subsp. <i>venerealis</i> 97/608     | cfx  | 0 |
|  |  |  | <i>Campylobacter fetus</i> subsp. <i>venerealis</i> 84-112     | cfz  | 0 |
|  |  |  | <i>Campylobacter fetus</i> subsp. <i>testudinum</i> 03-427     | camp | 0 |
|  |  |  | <i>Campylobacter fetus</i> subsp. <i>testudinum</i> pet-3      | cfp  | 0 |
|  |  |  | <i>Campylobacter curvus</i>                                    | ccv  | 0 |
|  |  |  | <i>Campylobacter hominis</i>                                   | cha  | 0 |
|  |  |  | <i>Campylobacter concisus</i> 13826                            | cco  | 0 |

|  |  |  |                                                            |      |   |
|--|--|--|------------------------------------------------------------|------|---|
|  |  |  | <i>Campylobacter concisus</i> ATCC 33237                   | ccoc | 0 |
|  |  |  | <i>Campylobacter lari</i> RM2100                           | cla  | 1 |
|  |  |  | <i>Campylobacter lari</i> RM16701                          | clr  | 1 |
|  |  |  | <i>Campylobacter lari</i> RM16712                          | clm  | 1 |
|  |  |  | <i>Campylobacter lari</i> CCUG 22395                       | clq  | 0 |
|  |  |  | <i>Campylobacter lari</i> NCTC 11845                       | cln  | 1 |
|  |  |  | <i>Campylobacter lari</i> subsp. <i>concheus</i> LMG 11760 | cll  | 1 |
|  |  |  | <i>Campylobacter coli</i> 76339                            | ccol | 1 |
|  |  |  | <i>Campylobacter coli</i> CVM N29710                       | ccc  | 1 |
|  |  |  | <i>Campylobacter coli</i> 15-537360                        | ccq  | 1 |
|  |  |  | <i>Campylobacter coli</i> RM1875                           | ccf  | 1 |
|  |  |  | <i>Campylobacter coli</i> RM4661                           | ccy  | 1 |
|  |  |  | <i>Campylobacter coli</i> RM5611                           | ccoi | 1 |
|  |  |  | <i>Campylobacter coli</i> FB1                              | ccof | 1 |
|  |  |  | <i>Campylobacter coli</i> OR12                             | ccoo | 1 |
|  |  |  | <i>Campylobacter iguaniorum</i>                            | caj  | 0 |
|  |  |  | <i>Campylobacter insulaenigrae</i>                         | cis  | 1 |
|  |  |  | <i>Campylobacter volucris</i>                              | cvo  | 1 |
|  |  |  | <i>Campylobacter peloridis</i>                             | cpel | 1 |
|  |  |  | <i>Campylobacter</i> sp. RM16704                           | camr | 1 |
|  |  |  | <i>Campylobacter subantarcticus</i> LMG 24374              | csm  | 1 |
|  |  |  | <i>Campylobacter subantarcticus</i> LMG 24377              | csf  | 1 |
|  |  |  | <i>Campylobacter gracilis</i>                              | cgra | 0 |
|  |  |  | <i>Campylobacter ureolyticus</i>                           | cure | 0 |
|  |  |  | <i>Campylobacter hyointestinalis</i>                       | chy  | 0 |
|  |  |  | <i>Campylobacter helveticus</i>                            | chv  | 1 |
|  |  |  | <i>Campylobacter sputorum</i>                              | cspf | 0 |
|  |  |  | <i>Campylobacter pinnipediorum</i>                         | cpin | 0 |
|  |  |  | <i>Campylobacter cuniculorum</i>                           | ccun | 1 |

|                         |    |    |                                        |      |   |
|-------------------------|----|----|----------------------------------------|------|---|
|                         |    |    | <i>Campylobacter lanienae</i>          | clx  | 1 |
|                         |    |    | <i>Campylobacter avium</i>             | cavi | 1 |
|                         |    |    | <i>Campylobacter hepaticus</i>         | chw  | 1 |
|                         |    |    | <i>Campylobacter</i> sp. RM12175       | camz | 1 |
|                         |    |    | <i>Campylobacter</i> sp. RM6137        | camy | 1 |
|                         |    |    | <i>Campylobacter ornithocola</i>       | coj  | 1 |
|                         |    |    | <i>Campylobacter upsaliensis</i>       | cux  | 1 |
|                         |    |    | <i>Campylobacter rectus</i>            | crx  | 0 |
|                         |    |    | <i>Campylobacter geochelonis</i>       | cgeo | 0 |
|                         |    |    | <i>Campylobacter blaseri</i>           | cbla | 0 |
|                         |    |    | <i>Campylobacter corcagiensis</i>      | ccor | 0 |
|                         |    |    | <i>Campylobacter armoricus</i>         | carm | 1 |
|                         |    |    | <i>Campylobacter mucosalis</i>         | cmuc | 0 |
|                         |    |    | <i>Campylobacter showae</i>            | csho | 0 |
|                         |    |    | <i>Candidatus Campylobacter infans</i> | cinf | 0 |
|                         |    |    | <i>Campylobacter novaezeelandiae</i>   | cnv  | 1 |
| <i>Sulfurospirillum</i> | 7  | 7  | <i>Sulfurospirillum deleyianum</i>     | sdl  | 0 |
|                         |    |    | <i>Sulfurospirillum barnesii</i>       | sba  | 0 |
|                         |    |    | <i>Sulfurospirillum multivorans</i>    | smul | 0 |
|                         |    |    | <i>Sulfurospirillum halorespirans</i>  | shal | 0 |
|                         |    |    | <i>Sulfurospirillum</i> sp. SL2-1      | suls | 0 |
|                         |    |    | <i>Sulfurospirillum</i> sp. JPD-1      | sulj | 0 |
|                         |    |    | <i>Sulfurospirillum</i> sp. ACSTCE     | sult | 0 |
| <i>Aliarcobacter</i>    | 11 | 11 | <i>Aliarcobacter butzleri</i> RM4018   | abu  | 0 |
|                         |    |    | <i>Aliarcobacter butzleri</i> ED-1     | abt  | 0 |
|                         |    |    | <i>Aliarcobacter butzleri</i> 7h1h     | abl  | 0 |
|                         |    |    | <i>Aliarcobacter skirrowii</i>         | ask  | 0 |
|                         |    |    | <i>Aliarcobacter trophiarum</i>        | atp  | 0 |
|                         |    |    | <i>Aliarcobacter cibarius</i>          | acib | 0 |

|                                    |   |   |                                      |      |   |
|------------------------------------|---|---|--------------------------------------|------|---|
|                                    |   |   | <i>Aliarcobacter cryaerophilus</i>   | acre | 0 |
|                                    |   |   | <i>Aliarcobacter lanthieri</i>       | alan | 0 |
|                                    |   |   | <i>Arcobacter porcinus</i>           | apoc | 0 |
|                                    |   |   | <i>Aliarcobacter faecis</i>          | afc  | 0 |
|                                    |   |   | <i>Aliarcobacter thereius</i>        | athr | 0 |
| <i>Arcobacter</i>                  | 7 | 7 | <i>Arcobacter nitrofigilis</i>       | ant  | 0 |
|                                    |   |   | <i>Arcobacter ellisii</i>            | aell | 0 |
|                                    |   |   | <i>Arcobacter aquimarinus</i>        | aaqi | 0 |
|                                    |   |   | <i>Arcobacter suis</i>               | asui | 0 |
|                                    |   |   | <i>Arcobacter cloacae</i>            | aclo | 0 |
|                                    |   |   | <i>Arcobacter venerupis</i>          | avp  | 0 |
|                                    |   |   | <i>Arcobacter defluvii</i>           | adz  | 0 |
| <i>Poseidonibacter</i>             | 2 | 2 | <i>Poseidonibacter lekithochrous</i> | alk  | 0 |
|                                    |   |   | <i>Poseidonibacter parvus</i>        | alp  | 0 |
| <i>Malaciobacter</i>               | 6 | 1 | <i>Malaciobacter halophilus</i>      | ahs  | 0 |
|                                    |   |   | <i>Malaciobacter mytili</i>          | amyt | 1 |
|                                    |   |   | <i>Malaciobacter marinus</i>         | amar | 0 |
|                                    |   |   | <i>Malaciobacter canalis</i>         | acaa | 0 |
|                                    |   |   | <i>Malaciobacter molluscorum</i>     | amol | 0 |
|                                    |   |   | <i>Malaciobacter pacificus</i>       | apai | 0 |
| <i>Halarcobacter</i>               | 3 | 3 | <i>Halarcobacter bivalviorum</i>     | hbv  | 0 |
|                                    |   |   | <i>Halarcobacter ebronensis</i>      | hebr | 0 |
|                                    |   |   | <i>Halarcobacter anaerophilus</i>    | aana | 0 |
| <i>Pseudoarcobacter</i>            | 1 | 1 | <i>Pseudoarcobacter acticola</i>     | paco | 0 |
| <i>unclassified<br/>Arcobacter</i> | 1 | 1 | <i>Arcobacter</i> sp. L              | arc  | 0 |
| <i>Hydrogenimonas</i>              | 1 | 1 | <i>Hydrogenimonas</i> sp. MAG        | hyo  | 0 |
| <i>Nitratifractor</i>              | 1 | 1 | <i>Nitratifractor salsuginis</i>     | nsa  | 0 |
| <i>Sulfurovum</i>                  | 3 | 3 | <i>Sulfurovum</i> sp. NBC37-1        | sun  | 0 |



|                      |   |   |                                    |      |   |
|----------------------|---|---|------------------------------------|------|---|
|                      |   |   | <i>Sulfurovum lithotrophicum</i>   | slh  | 0 |
|                      |   |   | <i>Sulfurovum indicum</i>          | sinu | 0 |
| <i>Nitratiruptor</i> | 1 | 1 | <i>Nitratiruptor</i> sp. SB155-2   | nis  | 0 |
| <i>Nautilia</i>      | 2 | 2 | <i>Nautilia profundicola</i>       | nam  | 0 |
|                      |   |   | <i>Nautilia</i> sp. PV-1           | nap  | 0 |
| <i>Caminibacter</i>  | 2 | 2 | <i>Caminibacter mediatlanticus</i> | cmed | 0 |
|                      |   |   | <i>Caminibacter pacificus</i>      | cpaf | 0 |

Table S2. Comparative analysis of P450 families and subfamilies in different classes of *Proteobacteria*. P450 family and subfamily data for *Alphaproteobacteria* and *Gammaproteobacteria* are retrieved from the published articles [1, 2] and used for comparative analysis.

| Family  | Subfamily | <i>Alphaproteobacteria</i> | <i>Betaproteobacteria</i> | <i>Gammaproteobacteria</i> | <i>Deltaproteobacteria</i> | <i>Epsilonproteobacteria</i> |
|---------|-----------|----------------------------|---------------------------|----------------------------|----------------------------|------------------------------|
| CYP101  | M         |                            |                           | 1                          |                            |                              |
|         | B         | 1                          |                           |                            |                            |                              |
|         | C         | 3                          |                           |                            |                            |                              |
|         | D         | 2                          |                           |                            |                            |                              |
|         | E         | 2                          |                           |                            |                            |                              |
|         | Q         | 1                          |                           |                            |                            |                              |
|         | R         | 1                          |                           |                            |                            |                              |
|         | F         |                            | 2                         |                            |                            |                              |
|         | N         |                            | 2                         |                            |                            |                              |
|         | P         |                            |                           |                            | 1                          |                              |
| CYP1007 | B         |                            |                           |                            | 1                          |                              |
|         | C         |                            |                           |                            | 2                          |                              |
|         | D         |                            |                           |                            | 1                          |                              |
|         | E         |                            |                           |                            | 1                          |                              |
|         | F         |                            |                           |                            | 1                          |                              |
|         | G         |                            |                           |                            | 1                          |                              |
| CYP1010 | A         | 1                          |                           |                            |                            |                              |
| CYP1011 | E         |                            |                           |                            | 3                          |                              |
|         | F         |                            |                           |                            | 1                          |                              |
| CYP1013 | A         |                            | 42                        |                            |                            |                              |
| CYP1017 | A         | 1                          |                           |                            |                            |                              |
| CYP102  | J         |                            | 5                         | 1                          | 1                          |                              |
|         | A         | 10                         | 6                         |                            |                            |                              |

|         |    |    |    |   |   |  |
|---------|----|----|----|---|---|--|
|         | E  |    | 14 |   |   |  |
|         | K  | 1  |    |   |   |  |
|         | AC | 1  |    |   |   |  |
|         | M  |    |    |   | 6 |  |
| CYP103  | A  | 4  |    |   |   |  |
| CYP1036 | B  | 1  |    |   |   |  |
|         | C  | 1  |    |   |   |  |
| CYP104  | A  | 13 |    |   |   |  |
| CYP1043 | C  |    |    | 1 |   |  |
|         | A  |    | 1  |   | 1 |  |
| CYP1049 | A  |    | 3  | 1 |   |  |
| CYP105  | BQ |    |    | 4 |   |  |
|         | BF | 3  |    |   |   |  |
|         | CX | 1  |    |   |   |  |
|         | B  |    | 1  |   |   |  |
|         | CV |    | 4  |   |   |  |
|         | CW |    | 4  |   |   |  |
|         | T  |    | 16 |   |   |  |
|         | AC |    |    |   | 1 |  |
|         | EK |    |    |   | 1 |  |
| CYP1061 | B  | 2  |    |   |   |  |
| CYP1068 | A  | 4  |    |   |   |  |
| CYP1069 | A  |    |    |   | 6 |  |
|         | B  |    |    |   | 1 |  |
|         | C  |    |    |   | 2 |  |
|         | D  |    |    |   | 1 |  |
|         | E  |    |    |   | 1 |  |
|         | F  |    |    |   | 1 |  |
|         | G  |    |    |   | 1 |  |

|         |    |   |    |    |   |  |
|---------|----|---|----|----|---|--|
|         | H  |   |    |    | 1 |  |
|         | J  |   |    |    | 2 |  |
| CYP107  | DJ |   |    | 3  |   |  |
|         | E  |   |    | 4  |   |  |
|         | HT |   |    | 1  |   |  |
|         | S  |   |    | 15 |   |  |
|         | AN | 8 |    |    |   |  |
|         | JE | 1 |    |    |   |  |
|         | DG |   | 12 |    |   |  |
|         | DN |   | 5  |    |   |  |
|         | DQ |   | 3  |    |   |  |
|         | NN |   | 1  |    |   |  |
|         | NP |   | 5  |    |   |  |
|         | NQ |   | 1  |    |   |  |
|         | NX |   | 1  |    |   |  |
|         | AM |   |    |    | 1 |  |
|         | CJ |   |    |    | 2 |  |
|         | DL |   |    |    | 7 |  |
|         | DP |   |    |    | 9 |  |
|         | EN |   |    |    | 2 |  |
|         | HU |   |    |    | 2 |  |
|         | HV |   |    |    | 4 |  |
|         | HW |   |    |    | 1 |  |
|         | HX |   |    |    | 3 |  |
|         | HY |   |    |    | 1 |  |
|         | HZ |   |    |    | 1 |  |
|         | JA |   |    |    | 1 |  |
| CYP1075 | A  | 1 |    |    |   |  |
| CYP1076 | A  | 1 |    |    |   |  |

|         |    |    |    |   |   |  |
|---------|----|----|----|---|---|--|
| CYP1077 | A  | 1  | 1  |   |   |  |
| CYP1078 | A  | 7  |    |   |   |  |
|         | C  | 1  |    |   |   |  |
| CYP108  | R  |    |    | 1 |   |  |
|         | A  | 2  |    |   |   |  |
|         | D  | 6  |    |   |   |  |
|         | G  | 18 |    |   |   |  |
|         | L  | 1  |    |   |   |  |
|         | P  | 2  |    |   |   |  |
|         | U  | 1  |    |   |   |  |
|         | V  | 1  |    |   |   |  |
|         | W  | 1  |    |   |   |  |
|         | X  | 5  |    |   |   |  |
|         | AB |    | 1  |   |   |  |
|         | E  |    | 2  |   |   |  |
|         | S  |    | 12 |   |   |  |
|         | Z  |    | 1  |   |   |  |
| CYP1081 | B  | 2  |    |   |   |  |
| CYP1082 | A  | 1  |    |   |   |  |
| CYP1083 | A  | 3  |    |   |   |  |
|         | C  | 2  |    |   |   |  |
| CYP1086 | B  | 1  |    |   |   |  |
| CYP1088 | B  | 2  |    |   |   |  |
| CYP1089 | A  | 1  |    |   |   |  |
| CYP109  | AK |    |    |   | 3 |  |
|         | C  |    |    |   | 5 |  |
|         | D  |    |    |   | 2 |  |
|         | N  |    |    |   | 4 |  |
|         | P  |    |    |   | 1 |  |

|         |    |    |    |   |   |  |
|---------|----|----|----|---|---|--|
|         | Q  |    |    |   | 4 |  |
|         | R  |    |    |   | 7 |  |
|         | S  |    |    |   | 1 |  |
| CYP1090 | C  | 2  |    |   |   |  |
| CYP1091 | A  | 3  |    |   |   |  |
| CYP1094 | A  | 3  |    |   |   |  |
|         | B  | 1  |    |   |   |  |
| CYP1097 | B  |    |    | 1 |   |  |
|         | A  |    | 16 |   |   |  |
|         | C  |    | 1  |   |   |  |
| CYP1098 | A  | 6  |    |   |   |  |
|         | B  |    | 8  |   |   |  |
|         | D  |    | 1  |   |   |  |
| CYP110  | J  |    | 1  |   | 2 |  |
|         | V  |    |    |   | 1 |  |
|         | AD |    |    |   | 1 |  |
|         | AU |    |    |   | 1 |  |
|         | AV |    |    |   | 1 |  |
|         | H  |    |    |   | 3 |  |
|         | R  |    |    |   | 5 |  |
|         | S  |    |    |   | 1 |  |
|         | T  |    |    |   | 1 |  |
|         | U  |    |    |   | 2 |  |
|         | W  |    |    |   | 1 |  |
| CYP1101 | A  | 29 |    |   |   |  |
| CYP1104 | B  |    | 1  | 3 |   |  |
|         | A  | 4  |    |   |   |  |
|         | C  | 3  |    |   |   |  |
|         | E  | 3  |    |   |   |  |

|         |   |    |    |   |  |  |
|---------|---|----|----|---|--|--|
| CYP1107 | A | 12 |    |   |  |  |
|         | B | 3  |    |   |  |  |
|         | C | 1  |    |   |  |  |
| CYP1108 | A |    | 1  |   |  |  |
| CYP111  | A | 1  |    | 1 |  |  |
|         | B | 1  |    |   |  |  |
| CYP1110 | A |    | 2  |   |  |  |
| CYP1111 | A | 5  | 2  |   |  |  |
|         | B | 1  |    |   |  |  |
|         | C | 1  |    |   |  |  |
| CYP1112 | A |    | 4  |   |  |  |
| CYP1116 | B | 3  |    |   |  |  |
| CYP1118 | B | 1  |    |   |  |  |
| CYP112  | A | 23 |    | 3 |  |  |
| CYP1135 | A | 1  |    |   |  |  |
|         | B |    | 1  |   |  |  |
| CYP1137 | A | 1  |    |   |  |  |
| CYP1138 | A |    | 3  | 1 |  |  |
|         | B | 2  |    |   |  |  |
| CYP114  | A | 22 |    | 4 |  |  |
| CYP1141 | A | 1  |    |   |  |  |
| CYP1142 | A |    |    | 1 |  |  |
| CYP1145 | A | 1  |    |   |  |  |
| CYP115  | A | 1  |    | 3 |  |  |
| CYP1155 | B | 1  |    |   |  |  |
|         | A |    | 1  |   |  |  |
| CYP1157 | C |    |    | 1 |  |  |
|         | D |    | 5  |   |  |  |
| CYP116  | B | 1  | 58 | 2 |  |  |

|         |   |    |   |   |   |  |
|---------|---|----|---|---|---|--|
|         | F |    | 1 |   |   |  |
| CYP1164 | A |    |   | 1 |   |  |
| CYP1165 | A |    |   | 1 |   |  |
|         | B |    |   | 1 |   |  |
| CYP117  | A | 22 |   | 3 |   |  |
|         | C |    | 4 |   |   |  |
|         | B |    |   |   | 1 |  |
|         | D |    |   |   | 1 |  |
|         | E |    |   |   | 4 |  |
| CYP1170 | A | 7  |   |   |   |  |
| CYP1171 | A | 1  |   |   |   |  |
| CYP1172 | A |    |   | 1 |   |  |
| CYP1173 | A | 1  |   |   |   |  |
| CYP1174 | A | 2  |   |   |   |  |
| CYP1175 | A | 1  |   |   |   |  |
| CYP1176 | B |    | 1 |   |   |  |
| CYP1179 | A |    |   | 1 |   |  |
|         | B |    | 4 |   |   |  |
| CYP1180 | A |    | 1 |   |   |  |
| CYP1181 | A | 1  |   |   |   |  |
| CYP1182 | A | 1  |   |   |   |  |
| CYP1183 | A |    | 1 |   |   |  |
| CYP1186 | A | 2  |   |   |   |  |
| CYP1187 | A | 1  |   |   |   |  |
| CYP1199 | A |    | 1 | 2 |   |  |
|         | C |    | 1 |   |   |  |
| CYP120  | F |    |   |   | 1 |  |
|         | G |    |   |   | 5 |  |
|         | H |    |   |   | 1 |  |



|         |   |   |    |   |   |  |
|---------|---|---|----|---|---|--|
| CYP1200 | B |   |    | 1 |   |  |
|         | A |   | 1  |   |   |  |
| CYP1201 | A |   |    | 1 |   |  |
|         | B |   |    | 1 |   |  |
| CYP1202 | A |   |    | 1 |   |  |
|         | B |   | 1  |   |   |  |
| CYP1204 | A | 2 |    |   |   |  |
| CYP1206 | B | 1 |    |   |   |  |
| CYP1220 | A |   | 13 |   |   |  |
|         | C |   |    |   | 1 |  |
| CYP1221 | B | 2 |    |   |   |  |
| CYP1224 | J |   |    |   | 3 |  |
| CYP1225 | A |   | 2  | 1 |   |  |
| CYP1229 | A | 1 |    | 1 |   |  |
|         | B | 2 |    |   |   |  |
|         | C | 1 |    |   |   |  |
| CYP1232 | F |   | 1  |   |   |  |
| CYP1234 | A |   |    | 5 |   |  |
|         | B |   |    | 1 |   |  |
| CYP1236 | A | 1 |    |   |   |  |
| CYP1246 | A | 2 | 1  |   |   |  |
| CYP1247 | A |   |    | 9 |   |  |
| CYP1248 | B |   |    |   | 2 |  |
| CYP125  | U |   | 1  |   |   |  |
|         | E |   |    |   | 2 |  |
|         | N |   |    |   | 1 |  |
| CYP125  | P | 1 |    |   |   |  |
| CYP1250 | A | 1 |    |   |   |  |
| CYP1258 | A | 1 |    |   |   |  |

|         |   |    |    |    |   |  |
|---------|---|----|----|----|---|--|
|         | B |    | 1  |    |   |  |
| CYP126  | C |    |    | 4  | 1 |  |
|         | B |    |    |    | 2 |  |
| CYP1261 | B |    |    | 1  |   |  |
| CYP1263 | B |    | 1  |    |   |  |
|         | C |    |    |    | 1 |  |
| CYP127  | A | 18 |    |    |   |  |
|         | C | 1  |    |    |   |  |
| CYP1275 | B | 1  |    |    |   |  |
| CYP1278 | A |    |    | 1  |   |  |
| CYP1281 | A | 1  |    |    |   |  |
| CYP1284 | B |    |    |    | 7 |  |
| CYP1286 | A |    |    |    | 2 |  |
|         | B |    |    |    | 1 |  |
| CYP1291 | B | 3  |    |    |   |  |
|         | C | 2  |    |    |   |  |
| CYP1295 | B |    | 1  |    |   |  |
| CYP1298 | A |    |    |    | 1 |  |
| CYP1302 | A | 2  |    |    |   |  |
| CYP1311 | A | 2  |    | 1  |   |  |
| CYP1312 | A | 1  |    |    |   |  |
| CYP1315 | B |    |    |    | 1 |  |
| CYP1318 | A |    | 1  |    |   |  |
| CYP1319 | A |    | 3  |    |   |  |
| CYP1326 | B | 2  |    |    |   |  |
| CYP1329 | A |    |    |    | 2 |  |
|         | C |    |    |    | 1 |  |
| CYP133  | B |    | 10 | 22 |   |  |
|         | C |    | 14 |    |   |  |

|         |   |   |   |   |   |  |
|---------|---|---|---|---|---|--|
|         | D |   |   | 1 |   |  |
|         | E |   | 4 |   |   |  |
|         | F | 1 |   |   |   |  |
|         | J |   | 1 |   |   |  |
| CYP1330 | A | 1 |   |   |   |  |
| CYP1335 | A |   |   |   | 2 |  |
| CYP1337 | A | 1 |   |   |   |  |
| CYP134  | B |   |   | 2 |   |  |
| CYP1347 | B |   |   |   | 6 |  |
|         | C |   |   |   | 1 |  |
|         | E |   |   |   | 1 |  |
| CYP1349 | A | 1 |   |   |   |  |
| CYP1350 | A | 1 |   |   |   |  |
| CYP1352 | B |   |   |   | 1 |  |
| CYP1355 | B |   | 4 |   |   |  |
| CYP136  | F |   |   | 2 |   |  |
| CYP1366 | A |   |   |   | 1 |  |
| CYP1371 | B | 1 |   |   |   |  |
| CYP1373 | B |   |   |   | 2 |  |
|         | C |   |   |   | 2 |  |
|         | D |   |   |   | 1 |  |
| CYP1376 | B | 1 |   |   |   |  |
|         | C | 1 |   |   |   |  |
| CYP1384 | A | 1 |   |   |   |  |
| CYP1387 | A |   |   |   | 1 |  |
|         | B |   |   |   | 1 |  |
| CYP1396 | A | 1 |   |   |   |  |
| CYP1405 | B | 1 |   |   |   |  |
| CYP1406 | B | 2 |   |   |   |  |

|         |   |    |   |   |   |  |
|---------|---|----|---|---|---|--|
|         | C | 1  |   |   |   |  |
| CYP1413 | A |    |   | 3 |   |  |
|         | B |    |   | 1 |   |  |
| CYP1414 | A |    |   | 2 |   |  |
|         | B |    |   | 1 |   |  |
| CYP1415 | A |    |   | 3 |   |  |
| CYP1448 | B |    |   |   | 1 |  |
| CYP1460 | C | 1  |   |   |   |  |
| CYP1464 | A |    | 4 | 2 |   |  |
| CYP1465 | A |    |   | 4 |   |  |
| CYP1466 | A |    |   | 1 |   |  |
| CYP1467 | A |    |   | 1 |   |  |
| CYP1468 | A |    |   | 1 |   |  |
| CYP1469 | A |    |   | 2 |   |  |
| CYP147  | D | 16 |   |   |   |  |
|         | A |    |   |   | 1 |  |
|         | L |    |   |   | 1 |  |
| CYP1470 | A |    |   | 3 |   |  |
| CYP1471 | A |    |   | 1 |   |  |
| CYP1472 | A |    |   | 1 |   |  |
| CYP1473 | A |    |   | 1 |   |  |
| CYP1474 | A |    |   | 3 |   |  |
|         | B |    |   | 2 |   |  |
|         | C |    |   | 2 |   |  |
| CYP1475 | A |    |   | 1 |   |  |
| CYP1476 | A |    |   | 1 |   |  |
| CYP1477 | A |    |   | 1 |   |  |
| CYP1478 | A |    |   | 1 |   |  |
| CYP1479 | A |    |   | 1 |   |  |

|         |   |  |    |   |   |  |
|---------|---|--|----|---|---|--|
| CYP1480 | A |  |    | 1 |   |  |
| CYP1481 | A |  | 1  | 2 |   |  |
| CYP1482 | A |  |    | 1 |   |  |
| CYP1483 | A |  |    | 1 |   |  |
| CYP1484 | A |  | 1  |   |   |  |
| CYP1485 | A |  | 6  |   |   |  |
| CYP1486 | A |  | 3  |   |   |  |
|         | B |  |    |   | 2 |  |
| CYP1487 | A |  | 2  |   |   |  |
| CYP1488 | A |  | 36 |   |   |  |
| CYP1489 | A |  |    |   | 2 |  |
| CYP1490 | A |  |    |   | 1 |  |
| CYP1491 | A |  |    |   | 1 |  |
| CYP1492 | A |  |    |   | 3 |  |
| CYP1493 | A |  |    |   | 1 |  |
| CYP1494 | A |  |    |   | 1 |  |
| CYP1495 | A |  |    |   | 1 |  |
| CYP1496 | A |  |    |   | 1 |  |
|         | B |  |    |   | 1 |  |
| CYP1497 | A |  |    |   | 1 |  |
| CYP1498 | A |  |    |   | 1 |  |
| CYP1499 | A |  |    |   | 1 |  |
| CYP1500 | A |  |    |   | 1 |  |
| CYP1501 | A |  |    |   | 1 |  |
| CYP1502 | A |  |    |   | 1 |  |
| CYP1503 | A |  |    |   | 1 |  |
| CYP1504 | A |  |    |   | 1 |  |
| CYP1506 | A |  |    |   | 5 |  |
| CYP151  | A |  | 1  | 2 |   |  |

|         |    |    |   |    |    |  |
|---------|----|----|---|----|----|--|
|         | C  | 2  |   |    |    |  |
| CYP1515 | A  | 2  |   |    |    |  |
| CYP152  | G  |    |   | 3  |    |  |
|         | R  |    |   | 2  |    |  |
|         | W  |    |   | 2  |    |  |
|         | X  |    |   | 1  |    |  |
|         | Y  |    |   | 1  |    |  |
|         | B  | 4  | 3 |    |    |  |
|         | C  | 3  |   |    |    |  |
|         | E  | 2  | 1 |    | 2  |  |
|         | P  | 1  |   |    |    |  |
|         | AA | 1  |   |    |    |  |
|         | AB | 2  |   |    |    |  |
|         | AR |    | 3 |    |    |  |
|         | S  |    | 2 |    |    |  |
|         | Z  |    |   |    | 1  |  |
| CYP153  | A  | 44 | 5 | 16 |    |  |
|         | C  | 2  |   |    |    |  |
|         | D  | 14 |   |    |    |  |
|         | E  |    |   | 3  |    |  |
| CYP155  | J  | 3  |   |    |    |  |
|         | K  | 1  |   |    |    |  |
|         | H  |    |   |    | 1  |  |
| CYP159  | B  |    |   | 4  |    |  |
|         | A  |    |   |    | 1  |  |
| CYP1591 | A  | 1  |   |    |    |  |
| CYP1597 | A  | 1  |   |    |    |  |
| CYP163  | K  |    |   | 1  |    |  |
| CYP167  | B  |    |   |    | 11 |  |

|         |   |    |   |    |   |    |
|---------|---|----|---|----|---|----|
|         | A |    |   |    | 1 |    |
|         | C |    |   |    | 1 |    |
|         | D |    |   |    | 1 |    |
|         | E |    |   |    | 2 |    |
| CYP168  | A |    |   | 18 |   |    |
|         | B |    |   | 1  |   |    |
|         | C |    |   | 1  |   |    |
| CYP1686 | A |    | 1 |    |   |    |
| CYP169  | A |    | 1 | 13 |   |    |
| CYP172  | B |    |   | 1  |   |    |
|         | A |    |   |    |   | 52 |
| CYP173  | A | 45 |   |    |   |    |
|         | B | 8  |   |    |   |    |
|         | C | 3  |   |    |   |    |
|         | G | 1  |   |    |   |    |
|         | H | 1  |   |    |   |    |
|         | J | 2  |   |    |   |    |
| CYP1732 | A | 3  |   |    |   |    |
| CYP1733 | A | 1  |   |    |   |    |
|         | B | 1  |   |    |   |    |
| CYP1734 | A | 1  |   |    |   |    |
| CYP1735 | A | 1  |   |    |   |    |
| CYP1736 | A | 1  |   |    |   |    |
| CYP1737 | A | 2  |   |    |   |    |
| CYP1738 | A | 1  |   |    |   |    |
| CYP1739 | A | 2  |   |    |   |    |
| CYP1740 | A | 1  |   |    |   |    |
| CYP1741 | A | 1  |   |    |   |    |
| CYP1742 | A | 1  |   |    |   |    |

|         |    |    |    |   |   |  |
|---------|----|----|----|---|---|--|
| CYP1743 | A  | 1  |    |   |   |  |
| CYP1744 | A  | 1  |    |   |   |  |
| CYP1745 | A  | 1  |    |   |   |  |
| CYP1746 | A  | 1  |    |   |   |  |
| CYP1747 | A  | 1  |    |   |   |  |
| CYP1748 | A  | 1  |    |   |   |  |
| CYP1749 | A  | 1  |    |   |   |  |
|         | B  | 1  |    |   |   |  |
| CYP1750 | A  | 1  |    |   |   |  |
| CYP1751 | A  | 1  |    |   |   |  |
| CYP1752 | A  | 4  |    |   |   |  |
| CYP1753 | A  | 1  |    |   |   |  |
| CYP1754 | A  | 1  |    |   |   |  |
| CYP1755 | A  | 1  |    |   |   |  |
| CYP177  | E  |    |    | 2 |   |  |
| CYP1779 | A  |    |    | 1 |   |  |
| CYP180  | D  | 1  |    |   |   |  |
| CYP183  | AG |    | 1  |   |   |  |
|         | AH |    |    |   | 2 |  |
|         | BE |    |    |   | 1 |  |
| CYP1833 | B  |    |    |   | 1 |  |
| CYP186  | K  | 7  |    |   |   |  |
| CYP191  | B  | 1  |    |   |   |  |
| CYP192  | A  | 3  |    |   |   |  |
| CYP193  | A  | 17 |    |   |   |  |
| CYP194  | A  | 10 |    |   |   |  |
|         | C  |    | 2  |   |   |  |
| CYP195  | A  | 18 | 29 |   |   |  |
|         | D  | 1  |    |   |   |  |



|         |    |    |   |   |   |  |
|---------|----|----|---|---|---|--|
|         | E  | 2  |   |   |   |  |
|         | C  |    | 1 |   |   |  |
| CYP196  | A  | 34 |   |   |   |  |
|         | B  | 2  |   |   |   |  |
|         | C  | 1  |   |   |   |  |
| CYP1962 | A  |    | 1 |   |   |  |
| CYP197  | R  | 2  |   |   |   |  |
|         | AA |    |   |   | 2 |  |
|         | AB |    |   |   | 2 |  |
|         | F  |    |   |   | 4 |  |
|         | G  |    |   |   | 1 |  |
|         | H  |    |   |   | 1 |  |
|         | J  |    |   |   | 1 |  |
|         | K  |    |   |   | 1 |  |
| CYP198  | A  |    |   | 3 |   |  |
| CYP1982 | B  |    | 3 |   |   |  |
| CYP199  | A  | 11 | 2 |   |   |  |
|         | B  | 1  |   |   |   |  |
|         | J  | 1  |   |   |   |  |
|         | K  | 1  |   |   |   |  |
|         | L  | 1  |   |   |   |  |
|         | M  | 1  |   |   |   |  |
|         | H  |    | 1 |   |   |  |
|         | V  |    | 2 |   |   |  |
| CYP200  | A  | 5  |   |   |   |  |
|         | B  | 2  |   |   |   |  |
|         | C  | 1  |   |   |   |  |
| CYP201  | A  | 25 |   |   |   |  |
|         | B  | 3  |   |   |   |  |

|         |   |    |    |   |   |  |
|---------|---|----|----|---|---|--|
|         | C | 3  |    |   |   |  |
|         | E |    | 1  |   |   |  |
| CYP202  | A | 46 |    |   |   |  |
|         | B | 24 |    |   |   |  |
| CYP203  | A | 12 | 6  |   |   |  |
|         | B | 1  |    |   |   |  |
| CYP204  | A | 2  |    |   |   |  |
| CYP206  | A | 9  |    |   |   |  |
|         | B | 1  |    |   |   |  |
|         | C | 3  |    |   |   |  |
|         | D | 6  |    |   |   |  |
| CYP209  | A |    |    |   | 1 |  |
| CYP210  | A |    |    |   | 1 |  |
|         | B |    |    |   | 1 |  |
| CYP212  | A |    | 34 |   |   |  |
|         | B |    | 6  |   |   |  |
|         | E |    | 1  |   |   |  |
| CYP2140 | A | 1  |    |   |   |  |
| CYP2159 | A |    | 1  |   |   |  |
| CYP219  | A | 2  |    |   |   |  |
| CYP220  | A |    | 2  |   |   |  |
| CYP221  | A |    |    | 2 |   |  |
| CYP223  | A | 2  |    |   |   |  |
|         | E | 1  |    |   |   |  |
| CYP224  | A | 1  |    |   |   |  |
| CYP2242 | A |    |    | 1 |   |  |
| CYP225  | A | 7  | 1  |   |   |  |
| CYP226  | A |    | 18 | 5 |   |  |
|         | C | 1  |    |   |   |  |

|         |   |   |    |   |   |  |
|---------|---|---|----|---|---|--|
|         | D | 1 |    |   |   |  |
| CYP229  | A |   |    | 7 |   |  |
|         | D |   | 1  | 7 |   |  |
|         | E |   |    | 4 |   |  |
|         | B |   | 4  |   |   |  |
|         | F |   | 39 |   |   |  |
|         | G |   | 1  |   |   |  |
|         | L |   | 4  |   |   |  |
|         | M |   | 4  |   |   |  |
|         | N |   | 1  |   |   |  |
|         | P |   | 1  |   |   |  |
|         | H |   |    |   | 1 |  |
| CYP2308 | A |   | 1  |   |   |  |
| CYP2334 | A | 2 |    |   |   |  |
| CYP234  | A |   |    | 1 |   |  |
| CYP2353 | A |   | 1  |   |   |  |
|         | B |   | 2  |   |   |  |
| CYP236  | A |   |    | 3 |   |  |
| CYP238  | A |   |    | 1 |   |  |
| CYP240  | A |   | 15 |   |   |  |
| CYP242  | A |   |    |   | 4 |  |
|         | B |   |    |   | 1 |  |
|         | C |   |    |   | 1 |  |
| CYP251  | V |   |    |   | 2 |  |
| CYP2528 | A |   |    |   | 1 |  |
| CYP253  | D |   |    |   | 5 |  |
|         | G |   |    |   | 6 |  |
|         | H |   |    |   | 2 |  |
|         | J |   |    |   | 1 |  |

|         |   |  |   |   |    |  |
|---------|---|--|---|---|----|--|
|         | K |  |   |   | 1  |  |
|         | L |  |   |   | 1  |  |
|         | M |  |   |   | 1  |  |
|         | S |  |   |   | 1  |  |
| CYP259  | A |  |   |   | 1  |  |
| CYP260  | A |  |   |   | 1  |  |
|         | B |  |   |   | 1  |  |
| CYP261  | D |  | 1 | 1 |    |  |
|         | A |  |   |   | 1  |  |
| CYP262  | B |  |   |   | 2  |  |
|         | A |  |   |   | 1  |  |
|         | C |  |   |   | 1  |  |
|         | D |  |   |   | 1  |  |
|         | F |  |   |   | 1  |  |
| CYP2624 | B |  |   |   | 1  |  |
| CYP263  | A |  |   |   | 3  |  |
| CYP264  | A |  |   |   | 6  |  |
|         | B |  |   |   | 1  |  |
|         | C |  |   |   | 1  |  |
|         | D |  |   |   | 14 |  |
|         | E |  |   |   | 2  |  |
|         | F |  |   |   | 1  |  |
|         | G |  |   |   | 1  |  |
|         | H |  |   |   | 1  |  |
|         | J |  |   |   | 3  |  |
|         | K |  |   |   | 3  |  |
|         | L |  |   |   | 1  |  |
| CYP265  | A |  |   |   | 1  |  |
| CYP266  | A |  | 1 |   | 1  |  |

|            |            |            |            |            |            |           |
|------------|------------|------------|------------|------------|------------|-----------|
|            | B          |            |            |            | 1          |           |
| CYP267     | C          |            | 1          |            |            |           |
|            | A          |            |            |            | 4          |           |
| CYP2724    | A          |            |            |            |            | 1         |
| CYP2730    | A          |            | 1          |            |            |           |
| CYP2733    | B          |            | 1          |            |            |           |
| CYP2742    | A          |            | 1          |            |            |           |
| CYP2743    | A          |            | 1          |            |            |           |
| CYP278     | A          | 1          |            |            |            |           |
|            | C          | 1          |            |            |            |           |
| CYP286     | C          | 1          |            |            |            |           |
| CYP288     | B          | 2          |            |            |            |           |
| CYP289     | A          | 33         | 14         | 6          |            |           |
|            | D          |            |            | 1          |            |           |
|            | E          |            | 1          |            |            |           |
|            | F          |            | 1          |            |            |           |
| CYP290     | A          | 5          |            |            |            |           |
|            | B          | 1          |            |            |            |           |
| CYP51      | B          |            |            | 2          | 2          |           |
| <b>292</b> | <b>564</b> | <b>873</b> | <b>603</b> | <b>277</b> | <b>333</b> | <b>53</b> |

Table S3. P450 identified and annotated in this study is presented as per their class. A header follows each P450 sequence consisting of protein ID, database, P450 name, species name, species code, and an abbreviation for the class, such as BP for *Betaproteobacteria*, DP for *Deltaproteobacteria*, and EP for *Epsilonproteobacteria*.

*Betaproteobacteria*

>VITFI\_CDS3214|KEGG|CYP1098B3|[Vitreoscilla filiformis]vff|BP

MSRFCPPYPRPVSDKTPAWRMFFSKRRSWLDGLYERSYHMKMGVHFPGVDLYMVNDPAL  
VREVMNADRFPKHLEMLGEALRPLLGDSIFTTNGEVWQRQRDLMDPSFEAARVKLVFGRM  
RDAAQAMVERLRQVPEGAVYDLEVEMTHVAADIILRTILSKSLDSEGARLIFDAFARYQD  
MAPRLMLPAFFGLRWLRPWWQIRRSRAAEDIRKLIVQLIRPRYDAYQTALASGNTEGVE  
TGGDILATLLRVRNAETGQGFTFDELVDQVAMLFLAGHETSASALSWSLHLLANAPDVQE  
RLHQESLDKLGAVGTDPSGLKDLELSRNVFRESLRLFPFVGFLVRASETGCPLGDKTVKP  
GGSMISPWLIQRHRQFWARPDEFDPDRYTHTEDTTPMTTRESLRKAYLPFGMGPRVCIG  
AAFALQEATLILSTLARHFRFEPVPGHRPEPVGRLLTLRAENGIPLKVFARDR

>VITFI\_CDS3233|KEGG|CYP203A11|[Vitreoscilla filiformis]vff|BP

MFSFDPYSPAVDADPFPPYQRLRDEFPCFWSPEAQMWVLSRYSDIVTALNDWQTYSSASGNLMTELPGRAGATLGSSDPPRHDRLRALVQHAFMKR  
NLLALETPIREVARDVFGTLKGVSEFDFKEVSSKFTVKVLMAALGLPMGDEALVPEQEVRDNAVLMVQSDARTRTKGPEHIAAYNWMQDYAAKVIA  
LRRAEPRDDLISHFAQAEIDGDKLDEREVLLTTTTLIMAGVESMGGFMMMFahnLATFADARRAVVANPALLPDAIEESLRFNTSAQRFRRLMKD  
VSLHGQTMKQGDFVCLAYGSGNRDERQFPNPEVYDITRKPRGHLGFGGGVHACLGTAIARMAVKIAFEFHRVVPDYRRVADQLAWMPSSSTFRSPL  
VLLLKAQ

>ADP71\_22770|KEGG|CYP151A16|[Vitreoscilla sp.]vit|BP

MDNSLIVEVPFLNFADPSFSIRSDAVKQAQDVSWYAKTPYGLAILRYDEVNALVRDQRLR  
QGSYAWPKHCNATGAFADWWTRMLLSKEGPNHSRLRRLANPAFSPKLVRLMQPVFFQLAN  
DLINQFIDQKCEFGVDFAAPYATQVICLLGIPLSEAKRLAELAVDMGVALGVTYERDQ  
NLVNGATDEMFEYCYEAVRRLKEEGLGDNFLSMLVKANENQADLSDEELFDMMLAIFGG  
IDTTRNQLSLAMDTFVQNPAQWQILGEQPDLAANAVEEIMRFRPTVTWVTREALEDFEFQ

GVFIKQGTTVHLISQAADNDPRAFGDVAFDITQKRKAHFGFGAGAHHCIGHFIARGDMKE  
ALALLAQRLHNVQYAAEPSYMPDSGNTGLNHLHIRFDAVKG

>CV\_2656|KEGG|CYP212A1|[Chromobacterium violaceum]cvi|BP  
MKTTPQSSCPFHAVGRPPTPPRSSAGRWPPGPESGLTGWGLLKLMSRDLMGTLAGWQREFGDLVHVRTWPEHQVIVSDPQLARELLVNQADALQRW  
ERALTVYRRVHGHSVLIAEGQVWREKRQALQPDFTRKSVQAFSPSIVEAARRAFEQWPARRAAWPIESELTSTMEVILRMMFSSGVGSEAQQAAEE  
AVHTLMVASTEELWRPASLPDWVPWQRKRRRARLLMNGLIERHLQARLAMPQDAWPEDLLSRLRLHLQQPQSWPLQAVRDECKTAFLAGHETVAT  
SLTWWAWCMASHPEIQERAREEALAALSGGGQADPAALQYVSQTLLETMRLYPAVPLLSRRALKPVTLDWTFPAKTVFMVPMQLMQHDERWFPE  
PRSYRPERFGPDARPQQGAYLPFGGGPRVCLGQHLAMAEMALVAAQQLLRYRLSAPEGAEPPRPVFHVSQRPSQPLTLGIARI

>BKX93\_03785|KEGG|CYP212A8|[Chromobacterium vaccinii]cvc|BP  
MKTTPQSSCPFHAGGHPPASPKPSSGSWPPGPEAGLTGWGLLTQLSRDLMGTLAGWQREFGDLVHVRTWPEHQVIVSDPHLARELLVNQADSLRRW  
ERALSIVYGRVHGHSVLIAEGEAWREKRQALQPDFTRKSVQAFSPSIEAAARRAFEQWPDRDAPWPIESELTSTMEVILRMMFSSGVGSEAREAAE  
AVHTLMVASTEELWRPASLPDWVPWQRKRRRARLLMNGLIERHLQARLRLPADAWPEDLLSRLRLHLQQPKSWPLQAVRDECKTAFLAGHETVAA  
SLSWWAWCMASHPDIEKARAEALAAWPGEESADADLSALQYVSQTLLETMRLHPAVPLLSRRRAVKPVTLDWTFPAKTVFMVPMQLMQHDERWF  
PEPLSYRPERFDPDARPQQGAYLPFGGGPRVCLGQHLAVAEMTLVAAQQLLRYRLSAPAGMAPRAVFHVSQRPSAPLALDIARI

>DK842\_20225|KEGG|CYP212A20|[Chromobacterium phragmitis]chri|BP

MKTTSSSSCPFRPGGPASQPNPQAGAWPPGPKPGLMGWRLLSRMSRDLMGTLADWQREFG  
DLVHVRTWPEHQIIVCHPQWARELLVSQADALQRWERALFVYGRVHGHSVLIAEGEAWHQ  
KRQALQPDFTRKSVQAFSPSIIDAGKQAFKWPERRDDAWPIERELTSLTMEVILRMMFSS  
GVGEEAQQAEDEVHTLMVASTDELWRPFSLPDWMPWQRKRRRARLVMGELIERHLQARLA  
VPPDAWPEDLLSRLRLHLHLEQPEEWPLQAVRDECKTAFLAGHETIAASLGWWSWSMASHP  
DIQQRAREEAIAAWPGDEHGEMDLSALQFVSQTLLESMLYPVAVPLLSRRRAIKPVAIGD  
WTFPARTVFMVPMQLMQHDERWFPEPRRYRPERFAPEAGRPQLGSYLPFGGGPRVCLGQH  
LAMAEMTLVAAQQLRRFRLSIPAGAQPVRPVFHVSRPDKPLTLAIARL

>DK842\_05860|KEGG|CYP261D1|[Chromobacterium phragmitis]chri|BP

MFATRGPGRGYMDGLICGRTDRTREFRFFIVWKEVLTEKDAWSETEAVAHRLSTRSETKAIVLLDQMQRNNMKRFNDLPAPPSLPFLGNAHQLDKK  
GLHLTLEKWAREYRQEPFRFQLGPLKFIVLSRPEDVRCVLKERPTQFRMRREMSKIFDEVGFSSVFTKEGEAWRRQRRMMQPAFTKHTLVFPVQI  
ARKALQLRDRLOKSNGEPLAIRHDFRRFTVDVGCLLVFGVDLNNLADDDNHVLHTFHNVVHTMNKRLRSLVPYWRLVKMPVDRRFDGSIQELRDMV  
TGIAHDVRRARMKRGEDLGEHCILHTMLAASEGDDATLTDDDEL FANMMILVLGSEGSTAAMLSWICFYLSQDEVLQQRLREELCDFDLETVDYDAIE  
SLPLTEAVIEETFIRSTVPALVLEALEDTEVGELHVDRGTRVFALTRVNGIMDTARDMVFDPRRWLNEDGSLASLKDARQTQFPFGYGPRVCPGA  
PLSNIELKLAIAMLVKHFKLEIVDGEAVEEVFMASAVPDNFRVKAIPLPKRPRESGSLVFGREEEREDARSPA

>DK843\_03200|KEGG|CYP212A20|[Chromobacterium phragmitis]chrB|BP  
MKTTSSSCPFRPGQPASQPNPQAGAWPPGPKPGLMGWRLLSRMSRDLMGTLADWQREFGDLVHVRTWPEHQIIVCHPQWARELLVSQADALQWE  
RALFVYGRVHGHSVLIAEGEAWHQKRQALQPDFTRKSVQAFSPSIIDAGKQAFKWPERRDDAWPIERELTSLTMEVILRMMFSSGVGEEAQQAEDA  
VHTLMVASTDELWRPFSLPDWMPWQRKRRLRLVMGELIERHLQACLAVPDPAWPEDLLSRLRLHLEQPEEWPLQAVRDECKTAFLAGHETIAAS  
LGWWSWSMASHPDIQQRAREEAIAAWPGDEHGEMDLSALQFVSQTLLESMLRYPVAVPLLSRRAIKPVAIGDWTFFPARTVFMVPMQLMQHDERWFP  
EPRRYRPERFAPEAGRPQQGSYLPFGGGPRVCLGQHLAMAEMTLVAAQLLRRFRLSIPAGAQPFRPVFHVSRQRPDKPLALAIARL

>D1345\_00555|KEGG|CYP2353B2|[Chromobacterium rhizoryzae]crz|BP  
MSAWPLDPLAAVVHAHPYPYRDLAQRQPLYFDAGLGLWVAAGHAQAAALASATCRVRPVEQPAPSQLGDGGLARTFCLWARMSEAPRHPALKAA  
LNRALATVAGAEAGGLAESLARDWLAREPLNGGLLDRMAQGLPVLTLAGLLGLPMEDAPGLVAEEAAGLARALAADADAEALESGERALEALQARVA  
KALPRSGGLLAVLRREWMEEEEALTANVIGLLFQSLDAGAGLFAAAVWHQAQGRPLAAGAAADWAWLALHDPVLHNTRRFVARDWHHGGQTPVAGA  
SLLVVLAAAALDPAGPGEGLMFGAGRHACPGQALALEIARGGLAALAAMRPDWKTLTAAARFRRLPNARVRIYDEEGSAE

>FYK34\_06710|KEGG|CYP212A21|[Chromobacterium paludis]chrM|BP  
MKTPTHSSCPLHADTKASTTANPGTSAWPPGPKAGLTGLRLVARMSRDLPGALAEWQSEFGDLVHVRTWPEHQVAVVSEPRLVRELLVSQAGALVRW  
QRARRIFSRIHGHSVLTAEGEAWRNKRQALQADFTQAAQAFSPAILAATEQALSAPWPEQDDRWPPIERALTSLTMDVIMRMLFSNGIGEDARTEQ  
AAHALMVASNAEFYQPFSLPDWMPWQRGRQARQVLERLIEDHLQTRLRLAREAWPEDLLSRLRLHLLQPPQAWPLQAVRDECKTTFLAGHETVAA  
TLTWWAWCMASHPEAQAAARAARQFAPEQAMGQAGAPWRYLVQTLQETLRLHPAAPILISRRALQPVTLGDWRLPAGTMYLVPVLLMHHDARWFP  
QPRSFRRPERFAPEAARPLGAYLPFGSGPRVCLGQHLAMSEMTLIAAQLLRRYELSVPEGQAAPEPAFYITRRPREPLRLRIRRR

>FYK34\_16325|KEGG|CYP2353A8|[Chromobacterium paludis]chrM|BP  
MNAWPEHALAAASHRDPYPYLELARQGWARDQRLGLWLAASHAAASAVLACPACRVRPLDEPAPAALAGLALGETFGCWLRMSEAPIHAPLRAAV  
AASLAAQEDERAQRRARDLARGFLAGAAPD GARLDALVDFLPAATLASLLGWPERSLLGWPERSLGLSGQVAAWCRAVAADAGAAEREAGEAACL



ALHAELAALADAGWLARWRQEFGE LGEDALRANLLGVLFQSRDAGAGLLAAGISWRCEGPWDWRAAAEWRRRLRADPVLHHTRRFVAEDATLAGQP  
LKAGDQVLVLLAAAARDPAGPGESMDFGRGRHGCPGERLALAIARGALAALEEIGPDWRALGGGLVFRGPPNVRMRRFGAGDGR

>CH06BL\_01070|KEGG|CYP2353B5|[Chromobacterium haemolyticum] chae|BP

MSAWPLDPLAAVVHAHPYPYRDLAQRRPLYFDAGLGLWVAAGHAAAQAVLASAACRVRP  
LEQPAPPLLGDGGLARTFCLWARMSEAPSHPALKAALNRALATVAGAEAGRLAESLARDW  
LAREPLSGLLDRMAQGLPVLTLAGLLGLEVEDEPALVAEVAALAQALAADADAETLARG  
EQALAAALQVRVAEALPRSDGLLAE LRREWTV EEAALTANVIGLLFQSLDAGAGLFAAAVW  
HQAQGRPLAAGAAADWAWLALHDPVLHNTRRFVARDWHHGGQTPAGASLLVVLAAAALD  
PAGPGEGLMFGAGR HACPGQALALEIARGGLAALAAMRPDWKTLTAAARFRRLPNARVRI  
YDEEGSAE

>C1H71\_18930|KEGG|CYP107NX1|[Iodobacter fluviatilis] ifl|BP

MITTKPLSFYDPAFYQNPYASFQRLMEKGEIHYVKFPSGVCGLVTGYDAAMKTLTHPNI  
GKNHKLGNNAHWRS LASIMPEPQH TTLSHLLHQDPPRHTALRALIMEAFSASRIDRFRE  
IALIAQRLLEPLQRAGECDLIADFASQLPLLVLSEVIGLSDKHRIQFKPVWCKVVQPVGP  
NDVGRAAYIGLLTELQSYIDTVIVESRGGDS DRLIVQLIAAYDGKKISRDELTSVLFQLL  
VAGQEPMTNQIGNAMLALLQHPEQLKQIREDSTRIDRAMTELLRYDGAFALSTWRFFTET  
TQWLGATVFAGDSVIVGLNAANHDSAQFGCPHKLDFAREPNKPLSFGYDHHYCPASALAR  
LELEVSIQAILEYLPNIQLACTDRELWINAVLARGLLALPVRYTLGASRS

>NH8B\_0727|KEGG|CYP289A13|[Pseudogulbenkiania sp.]pse|BP

MNTKQTPPRDAGAQRPSPDWDARAPAVLQDQIRAYDDMRHRCPVAYSEYLNWSLFRHDDV  
MQALTDPKTFSNAVSSYPSIPNGMDPPEHTAYRMLIDPYFAPEAMARFEPVCRRIAVDLV  
RELPSAGEVELMGQFAEDFALQIQCAFMGWPVALHDPLRRWTHRNRAATLAADRAAMAAV  
ALEFDGYIRAQLDARRAAGDQAPDDVTRRLGETLQGRTLSDAEIVCIVRNWTVGELSTI

SSCVGILTQYLAERAELQQRLRQQPELLPAAIDEILRIHAPLIANRRIATRDVEIGGCQL  
KAGDRVTLIWASANRDETVFGDADEFRLDRDPADNLLYGAGIHVCPGAPLARLELKIVME  
ALLSQTERIGTVAGKTPVRASYPASGYASLPLWIERAAGPAPQA

>DLM\_1347|KEGG|CYP1200A5|[Aquitalea magnusonii]amah|BP  
MNAPVSALAPVWVGDI PQLDAAAVYHATSPANGMARIILPSGHVAYHLTRYHEVLQVLT DARFVRRPCNTEDGPSFLPTITPNELLLNNDGASHAR  
LRKVVAKDFSAAGVATLRD TVIQATHARLDALSSQTGVIDLLDLVLECI PAEVDCHLLGIPLADRSYYRPLTHTVQIADPRDVPPELLRQFWLVYDY  
LMDLVTGRRTTAPHGLIRRFVAARHESVPPLNDEELVGILLGILIGGDQNILTVLCKVVYTLLAAPALWQSLRAQPATLPAMVEELLRLIPLGTTS  
TFPRIASEGVHGSFGFIPAGSVVYADVFAANRDP AVFADPLRIDPQRNASKHLQFGYGMHHC MGAAALARMEITTVLEILLQRM PDLQLAQPAASVP  
WTHGTILRRPASLPVCGLTLR

>RCFBP\_20388|KEGG|CYP1179B1|[Ralstonia solanacearum]rsc|BP

MSEIENMETLNLSSSDIEPHRYRLYE AHRQNA PALWYPSANSWLIFRHGDAASLARSPLV  
RTDYLVREKISDAMLEADPALREIVATISRWMIYNEAPIHGRLRTFMSRTFDRGYIERVR  
GRIASILAPRIEALKGRTEFDFVEALAH PVP AEILAAMLGLDEIDIVDFLRWSDAIADFM  
QDFVISPVPNRQIARATAEQ LLEMKAALREAI AVRRRQPKEDLLTDLACATGDDGSTITE  
EELMLQLIHLIFGGHKIPQFVLANTLHL LFKNPQYMLHGEEATFDKVS KLVD ESMRVESP  
IQFITRHAVDDFELNGQRIKKGDSIYLM LGSANRDPEVYSDPDTFQPYAPKRKGIHYGTG  
PHVCIGAALAGVTIAEILCSFLQATRSVEALYDL DHPEWTRNDTFHGVARMPVKA EYR

>RPSI07\_mp0406|KEGG|CYP1464A2|[Ralstonia solanacearum]rsl|BP  
MGDMQDTAAVAERDTVAGQQRD RATVDLLEVAR DGKPASVARPVAGNLAMKDGFPVMPGK  
VPLLGHVHRISQDALGELRKAEACGPMFWTYFGARLPVLQILDEEGLAILQNKYTDNSF  
LREQMPVITGAAMNAFDGPRHRNARHASSA AFSP TGLTRAQVGQFVVESIEQRLKRWTRE  
SKLAI F PETKDIALEVVFRI LGIKTHELAQWRRQYEEFFLGMIPLKINLPGFPAWRCRKA  
RGWLEARVAQIVATARADDDHDSL VGAMIFGRDDNGNGMSEVELVHNILGLGFAGSETTA  
SVMAWSALMLAQHPDVWRQLCRQVAGMDSVPSTQEELVRQAPLAE AIFRETMRLYPPAPF  
EMRKVHTEFEMMGHKIPAGVMVGVSLLHVS RNPERYPDPDSWKPERWLGVDRALTPVETC  
GFGGGPHACLGRHVAALEITL FITMLARELGPKGIVPRLAGKLPAPAYLPFLRPSNKAFL

DMTGR

>RPSI07\_mp0607|KEGG|CYP133B5|[Ralstonia solanacearum]rsl|BP

MKLADLKLADLSTPSFLENPYPLYETLREQGPFVIRIGPNGLMTGRYSIVDALLHNRQMGK  
NYMDSIRLRYGDKGPDMPFLFQGFSRMFLLINPPAHTRLRLSLMMQAFNARQIESMRELATA  
TAHQLIDGFEQKQSADLVAEFAFPLPVRIICRMLDVDIDDPALGVAASKLAKVFDPA  
SADELVKTSAAEYELAQYFTKVIEARRAQPGTDLISMLLRVEEDGQKLTHDEIVSNVILL  
FIAGHETTSNMIGNALIALHRNPRQLDLLKRDPSRMPNAVLECLRYDGSVQVTIRAAMED  
VEVEGEVVPRGTTVFLMLGAANRDPAQFTDPDQLDIGRQQGRPQTFGAGIIHHCLGYRLAL  
IELESALNALFERLPHLRLTNLDQLSWNQRGNLRGVNALMAAW

>RPSI07\_mp1116|KEGG|CYP229F11|[Ralstonia solanacearum]rsl|BP

MDIALDRPADPLQAVTHTDPAPYYTGLAAARPFHYDAALGWWIAAGAEAVGAVLGSLACT  
VRPADEPVPRHIASSPTGLFFSRLVRQTDGPGHAECKATVMAALGRLDLSAVAARAHRLA  
YMALPDATALGPALADAMHLRIPLATMTHALLGDDADAAACQORDIATYLAALSPGAPPAA  
IHHAQTAVARLSERVAAAPLAHADETIVANLAGLLAQTHDACAGLLGNAIVTLARQPGL  
AAHLRSHPHAIDPFLYEVLRLDAPVQNTRRFVSRDTTLCGESLRAGDRILVLLAAANVDT  
AANPDPLRFDLARVRRRVWTFGAGAHRCPAESLAVAVARETVQHLLSLPGIARWLAGAGE  
VRYQASPNARIPVFSPSHQEAP

>RSPO\_c02265|KEGG|CYP1179B1|[Ralstonia solanacearum]rsn|BP

MSEIENMETLNLSSSEIEPHRYRLYEHRQNAPALWYPAANSWLIFRHGDAASLARSPLVRTDYLVREKISDAMLEADPALREIVATISRWMIYNE  
APIHGRLRTFMSRTFDRGYIERVRGRIASILAPRIEALKGRTEFDFVEALAHVPAPAEILAAMLGLDEIDIVDFLRWSDAIADFMQDFVISPVPNRQ  
IAQATAEQLLEMKAALREAIAVRRRLPKEDLLTDLACATGDDGSTITEEELMLQLIHLIFGGHKIPQFVLANTLHLLFKNPQYMLHGEEATFDKVS  
KLVDESMRVESPIQFITRHAVDDEFELNGQTIKKGDSIYMLGSANRDPEVYSDPDTFQPYAPKRKGIHYGTGPHVCIGAALAGVTIAEILCSFLQA  
TRSVEALYDLDPWTRNDTFHGVARMPVKAEYR

>RSPO\_m00920|KEGG|CYP229F10|[Ralstonia solanacearum]rsn|BP  
MARDRGGGAFENEPSYALRTAMDIALDLPADPLQAVTHAGPAHYTALAAARPFHYDAALGWIIAASAAAVDAVLGHTACTVRPADEPVPRHLAAS  
PAGVFFGRLVRQIDGPDHGARRAAVLTALGRLDVSSVSAHAHRLAKMALPDATALGPALADAMHLRIPLATLAHALLGDDADAAACRQDIAAYLAA  
LSPEAPAAAIHRADTAVARLSERFATAPLAAHADEALVANLAGLLAQTHDACAGLLGNVVALARRPGLAGHLRTHPHAIDPFPLYEVLRLDAPVPM  
TRRFVSRDITLTCGESLRAGDRILVLLAAANVDASANPDPLRFDLARAPRRVWTFGAGAHRCPEGALAVAIARETVRHLLNLPGLIDRWLAGVAMVRY  
QASPNARIPVSAPSHQEAP

>RSPO\_m01039|KEGG|CYP133B5|[Ralstonia solanacearum]rsn|BP  
MKLADLSTPSFLENPYPLYETLRAQGPVFRIGPNALMTGRYSIVDALLHNRQMGKNYMDSIRLRYGEEGPKMPLFQGFSRMFLLINPPAHTRLRSM  
MMQAFNARQIESMRELATVTAHQILIDAFEQKRSADLVAEFAFPLPVRIICQMLDIDVDDAMVLGAAASKLAKVFDPAAPMSAGELVETSAAYEELAQ  
YFTKVIEARRAQSGTDLISMLLRVEEDGHKLTHDEIVSNVILLFMAGHETTSNMIGNALIALHRNPQQDLRLRDPSPRMPNAVLECLRYDGSVQVT  
IRAAMEDVEVEGEVVPRTTVFLMLGAANRDPDQFTEPDRLDIGRQDGRQLQTFGAGIIHCLGYRLALIELETALSALFTRLPLRLTNLDQLGWNQ  
RGNLRGVNALMAAW

>RSPO\_m01214|KEGG|CYP1464A2|[Ralstonia solanacearum]rsn|BP  
MTANMMSDQQETATVAQSDTAQRQSRATPPEVARAGEPARVARPVADNLTMKDGFPIMPG  
KAPLLGHVHKISQDALGELRRAEAAACGPMFWTYFGTKLPVLQIMDEAGLAILQNKYTDNS  
FLREQMPVITGEAMNAFDGPRHRNARHASSAASFPTGLTRAQVGQFVVDTIEQRLKRWTR  
ESKLAIFFPETKEIALEVVFRILGIETHELAQWRHQYEEFFLGMIPLKIDLPGFPAWRCRK  
ARRWLEARVARIVATARANGDHDSLVGAMIFGRDDNGNGMSEVELVHNLGLGFAGSETT  
ASVMAWSALMLSQHPEIWRQLCQQVAGLHSMPLTHEELVSQVPLAEAIFRETMRLYPPAP  
FEMRKVHTEFDMMGHRVPAGAMVGVSLHVSERNPERYPDPDNWRPERWLIDRALTPVET  
CQFGGGPHACLGRHVAALEITLFIAMLAELGPKGITPRLAGKLPPPAYLPFLRPSNKAF  
LDLTGR

>CMR15\_20043|KEGG|CYP212A14|[Ralstonia solanacearum]rsm|BP  
MSRDLLGSLAAWQREFGDVVHLHFWPEHEIVVTDPALARELLVSHHDALVRWERGIRVFAQVHGHSVLIAEGEAWRGKRHALQPSFSPKAVQAFVP  
TIAAATSRALLQWPRQDVRWPIENAITSLTMDVITRMMFSSEIGEEARAAEKAIRVVSAAADAIFYWPASAPDWMPWKRAKRRALAEHLGLIDRHV  
QTRLAQPHVWPDDLRLQLHQEEASAWPLHAVRDECMTAFLAGHETTAALTTWWAWCMACNPAAQTARKEVQAVLQGRTPDADMLASLPYLT  
QTIKETLRLYPAAVPLISRATRISIALGPWQFPARTMFLVPVQLMHHDPRWFPQPLSFRPERFAQDAPEIPRGAYAPFGAGPRVCLGQHLAMSEMT  
VIAAMVLQRFSLSPDGMQAPRPVVRVTLRPDQPMHLAIAPI

>CMR15\_mp10680|KEGG|CYP133B5|[Ralstonia solanacearum]rsm|BP

MKLADLSTPSFLANPYPLYETLRAQGPFVVRIGPNALMTGHYSIVDALLHNRQMGKSYMDS  
IRLRYGEDGPNMPLFQGFSRMFLMLNPPMHTRLRGLMMQVFNARQIEAMREVATATAHQL  
IDAFQKPSADLVAEFAFPLPVRIICQMMDLDDIDDAMALGVGVSKLAKVFDPAAPMSADEL  
VETSAAYEELAQYFTKVIEARRAQPGTDLISMLMRAEENGETLTHDEIVSNVILLFIAGH  
ETTSNMIGNSLIALHRNPQQLDLLKRDPSRMPNAVMECLRYDGSVQVTIRAAMEDVEVEG  
EVLPRGTTVFLMLGAANRDPAQFTDPDQLDIGRQQGRLQTFGAGIHHCLGYRLALIELEA  
ALGALFERLPNLRLTNLDQLSWNQRGNLRGVNTLMAAW

>CMR15\_mp10892|KEGG|CYP1179B1|[Ralstonia solanacearum]rsm|BP

METLNLSSADIEPVRYKLYESRRQNTPALWYPEANSWLVRHQDVASLARSMPMVRTDYLV  
REKISDAMLDADPSLREIVATISRWMVYNEAPIHGRLRTFMNRTFDRGYIERVRDRIASI  
LAPRIEALKGREEFDFVETLAHPVPAEILAAMLGLDEIEIVDFLRWSDAIADFMQDFVIS  
PVPNRVIAQATAKQLLEMKAALREAIAVRRRQPKEDLLTDLACAAGDGGDAITEEELMLQ  
LIHLIFGGHKIPQFVLANTLHLLFKNPQYL VHGEATFDKISKIVDESMRVESPIQFITR  
HAVDDFMLHGERIKKGQSIYMLGGSANRDAEVFGDPDTFQPDAPKRKGIHYGTGPHVCIG  
AALAGVTIANILCQFLQATRSVEPLYDLNNPEWTRNDTFHGVARMPKVTYR

>F504\_4509|KEGG|CYP133B5|[Ralstonia solanacearum]rse|BP

MKLADLSTPSFLENPYPLYETLRSQGPVVRIGPNALMTGHYSIVDALLHNRQMGKSYMES  
IRLRYGDEGPNMPLFQGFSRMFLMLNPPMHTRLRGLMMQVFNARQIESMREVATATAHQL  
IDDFEQKPSADLVAEFAFPLPVRIICQMMDLDDIDDAMALGVGVSKLAKVFDPAAPMSADAL  
VETSAAYEELAQYFTKVIEARRAQPGTDLISMLMRAEENGETLTHDEIVSNVILLFIAGH  
ETTSNMIGNALIALHRNPQQLDLLKREPSRMPNAVLECLRYDGSVQVTIRAALEDVEVEG  
EVLPRGTTVFLMLGAANRDPAQFTDPDQLDIGRQQGRLQTFGAGIHHCLGYRLALIELES  
ALGALFERLPNLRLTNLDQLSWNQRGNLRGVNALMAAW

>RSUY\_15200|KEGG|CYP1179B1|[*Ralstonia solanacearum*]rsy|BP

MSEIENMETLNLSSSEIEPHRYRLYEHRQNAPALWYPAANSWLIFRHSDAASLARSPLV  
RTDYLVRKISDAMLEADPALREIVATISRWMIYNEAPIHGRLRTFMSRTFDRGYIERVR  
GRIASILAPRIEALKGRTEFDFVEALAHVPVPAEILAAMLGLDEIDIVDFLRWSDAIADFM  
QDFVISPVPNRQIARATAAQ LLEMKAALREAIARRRRQPKEDLLTDLACATGDDGSTITE  
EELMLQLIHLIFGGHKIPQFVLANTLHLLFKNPQYMLHGEEATFDKVS KLVD ESMRVESP  
IQFITRHAVDDFELNGQTIKKGDSIYLM LGSANRDPEVYSDPDTFQPYAPKRKGIHYGTG  
PHVCIGAALAGVTIAEILCSFLQATRSVEALYDLDHPEWTRNDTFHGVARMPVKAEYR

>RSUY\_42850|KEGG|CYP229F10|[*Ralstonia solanacearum*]rsy|BP

MDIALDLPADPLQAITHADPAPYYAALAAARPFHYDAALGWWIAASAAAVDAVLGHTACT  
VRPADEPVPRHLAASPTGVFFGRLVRQIDGPDHSARRATILTALGRLDVSSVAAQAHRLA  
KMALPDATAALDPALADAMHLRIPLETLAHALLGDDADAAACRQDIAAYLAALSPDAPAGA  
IHRADTAVACLSARFATAPLAHADEALVANLAGLLVQTHDACAGLLGNVVALARRPGL  
AGHLHTRPHAIDPFLYEVLRLDAPVQNTRRFVSRDTALCGESLRAGDRILVLLAAANVDA  
SANPDPLRFDLARAPRRVWTFGAGAHRCPGESLAVAIARETVQHLLNLP GIDRWLAGVAM  
VRYQASPNARIPVFAPSHQEAP

>Rpic\_4258|KEGG|CYP102E4|[*Ralstonia pickettii*]rpi|BP

MRSASELPANASPAAAEPI PQPKGLPWLGNLLQLPKDRLAQTLLET SRQFPQGLYQLDFA  
GRRVPFVYSADLVAELCDETRFRKLIGPPLSFLRAGAGDGLFTAHQDEPNWGKAHRILLP  
AFSQRAMKGYFDVMLDVANALADKWARQGPADADIPVADDMTRLTLDTISLAGFGYRFDSF  
NTPELHPFLAAMVGVLSEAMGKLTRLPLKDRFMREHHRRFEHDVAAMHQLVDEVIRARRQ  
AKDGGIGASDLLGLMLNARDPLSDQPLDDTNIRFQVITFLIAGHETTSGLLT FALYMLLR  
HPAVLAQAYAEVDRVLP GDTVPQYAHLAQLDVIERVLKETLRLWPTAPSGVAPYEDTRI  
GGRYAIRKDQRVVTVLLALHRDPAVWDRPEAFDIDRFLPENEAKLHPHAYKPFNGERAC  
IGRQFALTEAKLALAVILQRFALSDPYDYGFHIKETLTLKPDGFRLLRARLRHARERLSVA  
TPSRTEAVTQDDAEGALAGGGEPMHVLYGGS LGTCQDIAEQLAATASRAGFDAKVAPLDT

IADALPQRGTLVVVAATYNGRAPDSARTLEARLDAADALTRQATGLRYAVLGCGNSQWPA  
FQAFPKRVEAMLAAAGAHAIVPRGEADGNAGFDAAVDAWTRSLWSALGARQTHADGPSVR  
VDYVAPDALRAAMLPPAARAMTVLANEELVSDATGLWDFTREAPRGPTRHLTVQLPDDVT  
YATGDHLAVYPRNADDRVDAAIARLALADALVTLTARHAHVRLPLNQPVSVRQLLRDF  
VELQDTATVRDITALHAATRCPFTRGQLAVWLEGDDAAERFDQDIQAPHVSVLDLLIRLP  
AIELTLEAFLARLGPMRPRFYSSARVSPGVAALTVGTVSGPAWSGVGTYRGTSNYL  
MTLRAGAEIAAAVRTPNPPFAPDVAHKPMVLIGAGTGIAPFRGFLEERAAQQAAGEAVA  
TSLLCFGCRHPEHDFLYRDTLRAWEDAGLVRVFPAYSCVAEHPHRFVQHALWDAREAVWA  
AFDAGATLYVCGDGRAMAPAVRDTLIRMHQARYGSDLATASGWLTAQMQSGRYRQDVFN

>Rpic\_4262|KEGG|CYP229F16|[*Ralstonia pickettii*]rpi|BP  
MTALDTAPPADVLAIVHADPAPYYAELAATRPFFFDATLGWVVAASAEAVDAVLGSRAC  
RVRPADEFPVKAVAATPTGAFFGRLVRQIDGPDHSTRKAKVMAALGRLDVSALAGQALRH  
ARTALPDAASLDAALDADAHFRVPLATMAQTLLGDHADAPACQADIAAYLAALGPGASAG  
VVAQADAAVGRLLQQRFADSPFAGGGDDSDADIANLAALLAQTYDACAGLLGNCIVALS  
AGLTARLRAQPLAIEPFVREVLRRDAPVQNTRRFVAHDIALLGQPLRAGDKVLVLAAN  
VDGTTNPDLRFDSRDTAPRLWTFGGGTHRCPADALATAIARETVRHLLSLPDVDRWLAG  
LGEVAYRPSPNARIPRFQA

>Rpic12D\_4368|KEGG|CYP102E4|[*Ralstonia pickettii*]rpf|BP  
MRSASELPANASPAEAEPQPQPKGLPWLGNLLQLPKDRLAQTLLETSRQFPQGLYQLDFAGRRVPFVYSADLVAELCDETRFRKLIGPPLSFLRAG  
AGDGLFTHAQDEPNWGKAHRILLPAFSQRAMKGYFDVMLDVANALADKWARQGPADIPVADDMTRLTLDTISLAGFGYRFDSENTPELHPFLAAM  
VGVLSSEAMGKLTRLPLKDRFMREHHRFEHDVAAMHQLVDEVIRARRQAKDGGIGASDLLGLMLNARDPLSDQPLDDTNIRFQVITFLIAGHETTS  
GLLTFALYMLLRHPAVLAQAYAEVDRVLPGDTVQYAHLAQLDVIERVLKETLRLWPTAPSFVAPYEDTRIGGRYAIRKDQRVTVLLALHRDPA  
VWDRPEAFDIDRFLPENEAKLHPHAYKPFNGERACIGRQFALTEAKLALAVILQRFALSDPYDYGFIKETLTLKPDGFRRLRARLRHARERLSVA  
TPSRTEAVTQDDAEGALAGGGEPMHVLYGGS LGTCQDIAEQLAATASRAGFDAKVAPLDTIADALPQRGTLVVVAATYNGRAPDSARTLEARLDA  
DALTRQATGLRYAVLGCGNSQWPAFQAFPKRVEAMLAAAGAHAIVPRGEADGNAGFDAAVDAWTRSLWSALGARQTHADGPSVRVDYVAPDALRAA  
MLPPAARAMTVLANEELVSDATGLWDFTREAPRGPTRHLTVQLPDDVTYATGDHLAVYPRNADDRVDAAIARLALADALVTLTARHAHVRLPLN  
QPVSVRQLLRDFVELQDTATVRDITALHAATRCPFTRGQLAVWLEGDDAAERFDQDIQAPHVSVLDLLIRLP  
AIELTLEAFLARLGPMRPRFYSSARVSPGVAALTVGTVSGPAWSGVGTYRGTSNYLMTLRAGAEIAAAVRTPNPPFAPDVAHKPMVLIGAGTGIAPFRGFLEERAAQQAAGEAVA  
TSLLCFGCRHPEHDFLYRDTLRAWEDAGLVRVFPAYSCVAEHPHRFVQHALWDAREAVWAAFDAGATLYVCGDGRAMAPAVRDTLIRMHQARYGSD  
LATASGWLTAQMQSGRYRQDVFN

>Rpic12D\_4372|KEGG|CYP229F16|[*Ralstonia pickettii*]rpf|BP  
MTALDTAPPADVLAIVHADPAPYYAELAATRPFFFDATLGWVVAASAEAVDAVLGSRACRVPADEPVPKAVAATPTGAFFGRLVLRQIDGPDHST  
RKAKVMAALGRLDVSALAGQALRHARTALPDAASLDAALDADAHFRVPLATMAQTLLGDHADAPACQADIAAYLAALGPGASAGVVAQADA AVGRL  
QQRFADSPFAGGDDSDADIANLAALLAQTYDACAGLLGNCIVALSRHAGLTARLRAQPLAIEPFVREVLRDAPVQNTRRFVAHDIALLGQPLRA  
GDKVLVVLAAANVDGTTNPDPLRFDSDRTPARLWTFGGGTHRCPADALATAIARETVRHLLSLPDVDRWLAGLGEVAYRPSPNARI PRFQA

>N234\_33520|KEGG|CYP229F9|[*Ralstonia pickettii*]rpj|BP  
MLTATLPDTGIDPLSAVIHPDPYPYYRELAARRPFFRDERLGLWVAAGPREVAAVLAHPDCRVRRPPAQPVPPALAGTAAGDLFGRLIRMNDGAAHA  
PLKQILMPMLAGIDPAAAAALRAAMATVIDAGAATGTPGERVNRWLFTLPVTVADLLGLPVAEGDGATAVAQRVAFAAAQSPLADAHTVRAGAE  
AAQWLGAWLADTTPGDGPLPALHQAHAAGIDAQAVAANTIGLLVQACEATAALAGNTLLRLGRGASDLALQAVVARVAQDDPPVQNTRRFLAADA  
QLCGHAVKAGDAVLVLLAAASCSGLAGGARPWTFGHGRHACPGERLAQALAAATVAALLERGADPAALAQAFRYRPSLNARMPHFL

>N234\_37805|KEGG|CYP108S1|[*Ralstonia pickettii*]rpj|BP  
MNHTDFDLPGDVAQVLVDPSAYADPARLHAAYTWARENNPLGRAVNDGDFPFVWVTKHADVTAISRDNHNFHNGDYSVVCRPKASIDHVIATTGRP  
NIVKALVHVDGDEHKGLRALTQSWFMPNSILKLDERIRGLARQIVDKLQQSDGNTIDFAKDIALHYPLHVIMDILGVPPPEDEPRMLLLTQELFGGE  
DPELKRAKQEASANDGALAKNLMVAVADFRDYFENVTAERRVNPNDVATLLANAVVNGEPISEVSRLGYVVIATAGHDTTSSSSAVAMWALSQY  
PELLPRLQADSSLIPQFIDEAVRIASPVRRHFMRTATADTEIRGRTIRKGDWLMLCYGSANRDEEVFDRPFDFSIDRKPNRHLAGFGGAHVCLGQHL  
AKMEMRILFEEMI PRLRRVEAAGEMEMIASCFVGGPKHLPVRCVMQ

>TK49\_21945|KEGG|CYP102E4|[*Ralstonia mannitolilytica*]rmn|BP  
MRSASELPANVSAMVDPKAEPQPQKGLPWLGNLLQLPKDRLAQTLLET SRHFPPQGLYQLDFAGRRVPFVYAADLVAELSDETRFRKLIGPPLSFL  
RAGAGDGLFTAHHDEPNWGKAHRILLPAFSQRAMKGYFDMLEVANALADKWARQGPEADIAVADDMTRLTLDTISLAGFGYRFDSFNTPELHPFL  
AAMVGVLSEAMGKLTRLPLKDRFMREHHRRFAQDVAAMHALVDEVIRARRHAPDGAAAASDLLGLMLNARDPVTDEPLDDTNIRFQVITFLIAGHE  
TTSGLLTFALYMLLRNPAVLAQAYAEVDRVLPGDTVPPQYAHLARLDVLERVLKETLRLWPTAPSFAPYEDTRIGGRYVIRKDQRVVTLLLGLHR  
DPAVWARPEVFDIDRFLPENEARLHPHAYKPFNGERACIGRQFALTEAKLALAVILQRFALSDPYDYGFRIKETLTLKPDGFRLRARRRNAHERL  
SVAMPARVDAKQPDAAEALAGGGEPMHVLYGGSLGTCQDIAEQLAATASRAGFDAKVAPLDTIADALPQHGT LIVVAATYNGRAPDSARTLEARL  
DASGARVPQASALRYAVLGCNSQWPFAFQAFPKRVEAMLAASGAQAI VPRGEADGNAGFDAAVDAWIRGLWSALGAREHAEGASVSVRYVAPDAV  
RAATLPPTARPVTVLGNDELVS DPTGLWDF TQEAPRGPTRHITVRLPDGETYATGDHLAVYPRNADDRVDAATARLGLEADALVTLTARHAHVRL  
PLEQPVSVRQLLRDFVELQDTATVRDIAALHAATRCPVTRGQLAVWLEGDEAARRFDQDVQAAHVSVDLLIRFP AIELSLEAFLARLGAMRPRFY  
SIASSARVSPQVSLTVGMVSGPAWSGAGMYRG TASNYLMQLRPGA EIAAAVRTPNPPFAPEADASTPMVLIGAGTG IAPFRGFLEERAARQAAGH  
AVATSLLCFGCRHPEHDFLYRDTLRAWQDAGVVRVFPAYSCVPGHPHRFVQHALWDARDAVWAAFDAGATLYVCGDGRAMAPAVRDTLIRMHQARH  
GSDLATASDWLAAQMQAGRYRQDVFN



>TK49\_21965|KEGG|CYP229F17|[*Ralstonia mannitolilytica*]rmn|BP  
MDIAIAPPIDALQAVTHADPAPYYAQLAATRAFFFDAAALGWWVAASAKAVDTVLGSDACR  
VRPADEPVPNAVAASPAGAFFGRLVRQIDGPEHGMRKAIVMAVLGKLDTSALAARARRQA  
YAALPDTAQLDAALAGDAHFRVPLATMAQTLLGDAADAPACHADIAAYLAALGPAPDAAS  
VAQADAAVRRLHGRFEGSPLVAGNDDAEVDNLAALLAQTYDACAGLLGNCIVALSRHAAL  
RTRLRAQPGAVEPFVREVLRHDAVPVQNTRRFVQRDVQLLGQHVQAGQRILVLLAAANVDA  
AVNPAPLRFDIDRPAPRLWTFGAGVHRCPAETLATIIARETVRHLLGLPGIDRWLGNLGE  
VTYRASPNARIPVFSA

>ACS15\_2481|KEGG|CYP212A11|[*Ralstonia insidiosa*]rin|BP

MSRDLLGTLAAWQREFGDVVHLRFWPEHEIVVSDPSLVRELLVTHHDALVRWERGMHVFA  
QLHGHSVLIAGEAWRGKRHAMQPNFSPKAVQAFVPTISAATEKALAQWPKHDVRWPIES  
AITSLAMDVITRMMFSSEIGEEARIAEQAIRVVSAANAIFYWPASAPDWVPWKRAKRA  
LAALHGLIDHHLQARLAQPQDAWPDDLRLRLRLHRDAPTAWPLHAVRDECMTAFLAGHE  
TTAATLIWWAWCMASNPAAQALARREVQQTLOGHAPSPDTLASLPYLTQTIKETRLRYP  
APVLVSRRSTRPITLGTWQLPARTMFLIPVQVMHHDPRWFPEPLAFRPERFALDALELPR  
ARGAYLPFGTGPRVCLGQHLAMSEMTVIAAMLLQRFTLSPVDPNMQPPRPVMNVTLRPDQQ  
LHLAITPA

>ACS15\_4201|KEGG|CYP102E4|[*Ralstonia insidiosa*]rin|BP

MRSASELPSNASSAAAEPIQPKGLPWLGNLLQLPKDRVAQTFLEISRQFPQGLYQLDFVGRCVPFVYSADLVAELCDETRFRKLIGPPLSFLRAG  
AGDGLFTAHQDEPNWGKAHRILLPAFSQRAMKGYFDVMLEVASALADKWTRQGPDADISVADDMTRLTLDTISLAGFGYRFDSFKTPALHPFLEAM  
AGVLSEAMGKLTRLPFKDRFMHEHRRFERDVAAMHQLVDEVIRKRRHAQDGGTGASDLLGLMLNARDPVTDLPLDDTNIRFQVITFLIAGHETTS  
GLLTFALYMLLRHPAVLAQAYAEVDRIILPGDTPQYAHLAQLDVIERVLKETLRLWPTAPSFGVAPYEDTRIGGRYAIRKDQRVVTLLMALHRDPA  
VWDRPEVFDIDRFLPENEARIHPHAYKPFNGERACIGRQFALTEAKLALAVILQRFALSDPHDYAFHIKETLTLKPDGFRRLRARLRNARERLLVS  
VPSQADLTVDAQTQTTLAGGGEPMHVLYGGS LGTCQDIAEQIAATASRAGFAAKVAPLDAIADALPQQGTLLVVVAATYNGRAPDSARTLEGRLDSA  
DALVRLAPGLRYAVLGCNSQWPAFQAFPKRVDAMLAAGAQAQAVVPRGEADGNGGFDTAVDATWTRSLWAALGARQVQADAAAVSVQYLAPDAVRAT  
VLPAAARSMTVLANEELVCDPTGLWDFTREAPRGPTRHLTVRLPQGVTYATGDHLAVYPRNADDRVEAAIARLGLEGEALVTTLTAQHAAHVRHLPLN  
QPVTVRQLLRDFVELQDTATARDITALHAITRCPFTRS QLAVWIDGEEAAQRFQDIQAAHVSVDLLIRFPAIELTLEGFLARLGAMRPRFYSSIA  
SSARVSPDVAALTVGTVSGPAWSGVGTYRG TASNYLTQLPAGAEIAATVTRTPNPPFAPDVDASKPMVLICAGTGIAPFRGFLEERAAQQAAGEAVA  
TSLLCFGCRHPEHDFLYRDALRAWEDAGVVQVLPAYSCVDSHPHRFVQHALWDPREAVWAAFDAGATLYVCGDGRAMAPAVRDTLIRMHQARYGSD  
LATASDWLTEQMOSGRYRQDVFN

>ACS15\_4205|KEGG|CYP229F6|[*Ralstonia insidiosa*]rin|BP

MNITSAPPADPLQAIVHADPTPYAELAATRPFFFDAALGWWVAASADAVEAVLCSSACR  
VRPAEEPVPKAVAASPTGTFFGRLVRQIDGPDHAARKATVMAALGRLDVAALANRAHQQA  
HAALPDATALDAVLSTDAHFRVPLATIAQTLLADQADTHACQNDITAYLAALGPHADASV  
VERADAAVGRLQQRFADSPFATSDDDADISNLAALLAQTYDACAGLLGNSIVTLARHPPEL  
VERLHAAPEAIEPFVREVLRLDAPVQNTRRFVAQDTELLGQPMRAGDRILVLLAAANVDA  
AANPNPLRFDVDRAQPRLWTFGGGAHRCPAETLAVVIARETVQHLLRLPGIARWLANLGE  
ITYRPSPNARIIPVFQA

>CDC45\_21165|KEGG|CYP133B5|[*Ralstonia pseudosolanacearum*]rpu|BP

MKLADLSTPSFLENPYPLYETLRSQGPFVRIGPNALMTGHYSIVDALLHNRQMGKSYMESIRLRYGDEGPNMPLFQGFSRMFLMLNPPMHTRLRGL  
MMQVFNARQIESMREVATATAHQ LIDDFEQKPSADLVAEFAFPLPVRIICQMMDL DIDDAMALGVGVSKLAKVFD PAPMSADALVETSAAYEELAQ  
YFTKVIEARRAQPGTDLISMLMRAEENGETLTHDEIVSNVILLFIAGHETTSNMIGNALIALHRNPQQLDLLKREPSRMPNAVLECLRYDGSVQVT  
IRAALEDVEVEGEVLPRGTTVFLMLGAANRDPAQFTDPDQLDIGRQQGRLQTFGAGIHHCLGYRLALIELESALGALFERLPNLRLTNLDQLSWNQ  
RGNLRGVNALMAAW

>JK151\_04820|KEGG|CYP133B5|[*Ralstonia syzygii* subsp. *Celebesensis*]rsg|BP

MKLADLSTPSFLENPYPLYETLREQGPFVRIGPNGLMTGRYSIVDALLHNRQMGKNYMDS  
IRLRYGDKGPDMPFLFQGFSRMFL LINPPAHTRLRLSLMMQAFNARQIESMRELATATAHQ L  
IDGFEQKQSADLVAEFAFPLPVRIICRMLDVDIDDAPALGVAASKLAKVFD PAPMSADEL  
VKTSAAYEELAQYFTKVIEARRAQPGTDLISMLLRVEEDGQKLTHDEIVSNVILLFIAGH  
ETTSNMIGNALIALHRNPRQLDLLKRDPSRMPNAVLECLRYDGSVQVTIRAAMEDVEVEG  
EVVPRGTTVFLMLGAANRDPAQFTDPDQLDIGRQQGRPQTFGAGIHHCLGYRLALIELES  
ALNALFERLPHLRLTNLDQLSWNQ RGNLRGVNALMAAW

>JK151\_14030|KEGG|CYP1464A2|[*Ralstonia syzygii* subsp. *Celebesensis*]rsg|BP

MGDMQDTAAVAERDTVAGQQRN RATVDPLEVAR DGK PASVARPVAGNLAMKDGFPVMPGK  
VPLLGHVHRISQDALGELRKAEAA CGPMFWTYFGARLPVLQILDEEGLAILQNKYTDNSF

LREQMPVITGAAMNAFDGPRHRNARHASSAAFSPTGLTRAQVGQFVVESIEQRLKRWTRE  
SKLAIFFPKTKDIALEVVFRIKGIKTHELAQWRRQYEEFFLGMIPLKINLPGFPAWRCRKA  
RGWLEARVAQIVATARADDDHDSL VGAMIFGRDDNGNGMSEVELVHNILGLGFAGSETTA  
SVMAWSALMLAQHPDVWRQLCRQVAGMDSVPSTQEELVRQAPLAEAI FRETMRLYPPAPF  
EMRKVHTEFEMMGHKIPAGVMVGVSLLHVS RNPERYPDPDSWKPERWLGVDRALTPVETC  
GFGGGPHACLGRHVAALEITL FITMLARELGPKGIVPRLAGKLPAPAYLPFLRPSNKAFL  
DMTGR

>H16\_B1009|KEGG|CYP102E2|[Cupriavidus necator]reh|BP  
MPPPIELSSPDQASDAPHQAPARSMHAPIPEPIPRDPGWPLVGNLLQITPGALGQHLLAR  
SRHHDGIFELNFAGRRVPFVTSVALASELCDAAQFRKYIGPPVSYLRGMAGDGLFTARSD  
EANWGKAHRILMPAFSQRAMKGYFDVMLRVANRLVDKWDQQGPDADI AVADDMTRLTLDT  
IALSGFGYDFESFASTELHPFIEAMVGALEEAMSKLTRFALQDRFMHAAHQKFDQDTRFM  
RDLVDDVIRRRRAGDAAERPGGTANDLLGLMLEARDPDTDQRLDDENIRNQVITFLIAGH  
ETTSGLLTFALYELLRNPGVMAQAYAEVDAVLPGDAAPVYADLARLPVLDRVLKETLRLW  
PTAPAFAVAPFEDTLLGGRYLIRKDRRLSVVLTALHRDPK VWADPERFDIDRFLPEQEAK  
LPRHAYMPFGNGERACIGRQFALTEAKLALALMLRN FQFTDAHDYQFRIKETLTIKPDGF  
TVRRARRRRPHERIAAAPLAGTAQAPRAGPDVQGRGRTLAVLCGSSLGTARELAEQVHAGA  
LAAGFDATLRDLDDVADALPTTGLAVIIAATYNGRAPDSARRLEALLDSGAASGYRAEAL  
SVAVLGCGNSQWPTYQAFPRRVYEFFTNAGASPLLPRGEADGNGDFDQ AVERWLALLWQA  
LQAGDGVGGPAHGTPPVRVQVKDVAEIRASTLPANTEAFTVLANTELVNDPSGLWDFSHE  
APRTSTRDIRLRLPDGVRYATGDHLAVYPQNQPGMVAA L CERIGIDPD AIVTLSASGGAA  
RGLPLGEALS VRQLLTHFVELQDVVSRHTLRLLSQSSRCPVTRQALRQLASDDAGSGYAA  
QVAPRRLGLADVLD RFPAIEVDLAGLLACTVPMRPRFY SIASSPLVSPGVATITVGTVWS  
PALSGRGLFRGVASTWLQGLAPGAMVAGAIRTPNPTFAPAADPATPMILIGPGTGIAPFR  
GFLEERAAQQAAGQP VAPVQLYYGCRHPAHDWLYRNNVERWQAQGVVQVHLACSVVDGEP  
RYVQDLLWQRRADVWARLNQGAI IYVCGDGRHMAPAVRQVLIQIGAEQGGMTPEAASDWL  
ADLVSAGRYRQDVFN

>H16\_B1279|KEGG|CYP116B137|[Cupriavidus necator]reh|BP

MANPSPSAARSGCPIDHSALTAPNGCPVSHNAAQFDPFGDGYQQDPPEYVRWSREQEPVF  
YSPRLGYWVTRYEDIKAI FRDNLTFSPSIALEKITPTGDEANAVLASYGAMNRTL VNE  
DEPAHMPRRRALMAPFTPAELAHHEPLVRRLAREYVDRFIDDGRADLVDQMLWEVPLTVA  
LHFLGVPEEDMDLLRQYSIAHTVNTWGRPKPEEQVAVAHAVGNFWQLAGRILDKMREDPS  
GPGWMQYGLRKQKELPDVVTDSYLHSM MMAGIVAAHETTANASANA I K L L L Q H P D A W R E I  
CDDPSLIPNAVEECLRHNGSVAAWRRLVTRDAEVGGIRLPAGSKLLIVTSSANHDERHFA  
DADLFDIRRDNASEQLTFGYGSHQCMGKNLARMEMQVFLEELTRRLPHMRLAEQTFTYVP  
NTSFRGPEHLLVEWDPAQNPERRD PALLEVHQPV RIGEPSAHTIARTVVVERVTPAADGV  
VRLRLAAPDGKPLPRWAPGSHIDVECGDTGLSRQYSLCGDPDDTGALEIAVL RDPDSRGG  
SAWVHGSVQAGDRLRIRGPRNHFRFDEGCGR AIF IAGGIGITPVSAMARRARALGIDYEF  
HYCGRSRQAMAM LDELQALHGARLHVHASDEGQRA DFGKLLARPDPRTQIYACGPQRM LD  
ALAESCAAWPEDALRVEHFVSKLGTLDASKELPFSVELKD SGLVMEVPAGQTL LSALRGA  
NIDVQSDCEEGLCGSCEVRVLAGQVDHRDVVLTRSEREANQRMMACCSRACGGGRLVLEL

>H16\_B1743|KEGG|CYP194C2|[Cupriavidus necator]reh|BP  
MTDTNQHALLHDGYDLLSDHYVQEAHALWRDIRSSGCPVAHSEKWGGSWLPTTYDDIHHVAQNPAVFSSRAAEIAGEVPPQGSGLVLPPLTSDPPD  
HKIHRDLLEPYFTPARVAAIEPYAQSLARDLARRVAVKGEADLGEDYSKPFVLSLLTRFLDVPDDRQERFMDWAI RVLKYGPF DQELRKAAFDEAF  
ADLEQLLKEREQDPGEDLVSHIALATIDGKPI SRKHRIGSLLLAVLAGADTTWNALNASLNHLADHPADRATLINEPGLLRTTAVEELLRFYAPLS  
IARVTTEEEVELKGRCIGAGERVILAYPAANRDP AVFENPDEVQLDRKRN RHLTFGVGVHRC LGS H LARMEMRVAIEEWLKAIPNFERISGAVKWSA  
GNARGPENVRIRVV

>H16\_B2406|KEGG|CYP229F14|[Cupriavidus necator]reh|BP  
MPD TDIDPLSAVTHPDYPYRELAASQPFFRDDR LGLWVAAGPQEVADVLAHSDCRVRPPAQVPPALAGTAAGELFGRLVRMNDGAAHAPLKAL  
LMPMLAGIDPAAAAQRATVLA AVLDAGEASWAAMSGECINRWLFTLPVVTVADLLGLPVANEGSSAAEAAQRVA AFAGAQSPLADAPAVRAGAEAA  
QWLGHWLADAADGAGPLPALRQAARAAGIDAQAVAANIIGLLVQACEATAALAGNTLLRLGRD TTQSGLPLDAVVARVAREDP PVQNTRRFLAADA  
QLCGHAVKAGDAVLVLLAAASCSGAAASERPWTFGHGRHACPGDRLAQALAAATVAALRARGADPAALAQAFRYRPSLNARI PHFL

>CNE\_2c09660|KEGG|CYP102E2|[Cupriavidus necator]cnc|BP  
MPPPIELSSPDQASDAPHSPARPMHAPNPEPIPRDPGWPLVGNLLQITPGALGQHLLAR  
SRHHDGIFELNFAGRRVPFVTSVALASELCDAARFRKYIGPPLSYLRGMAGDGLFTARSD  
EANWGKAHRILMPAFSQRAMKGYFDVMLRVANRLVDKWDRQGP DADI AVADDMTRLTLDT  
IALSGFGYDFESFASANLHPFIEAMVGALEEAMSKLTRFALQDRFMHAAHQKFDQDTRFM  
RDLVDDVIRRRRAGNAAQRRGGTANDLLGLMLEARDPD TDQRLDDENIRNQVITFLIAGH

ETTSGLLTFALYELLRNPGVMAQAYAEVDAVLPGDAAPVYADLARLPVLDRVLKETLRLW  
PTAPAFAVAPFEDTLLGGRYLIRKDRRLSVVLTALHRDPKVVADPERFDIDRFLPEQEAK  
LPRHAYMPFGNGERACIGRQFALTEAKLALALMLRNFQFTDAHDYQFRIKETLTIKPDGF  
TVRARRRRPHERIAAAPVAGTAQAPQAGPDVQGGGRPLAVLCGSSLGTARELAEQVHAGA  
LAAGFDATLRDLDDVADALPTTGLAVIIAATYNGRAPDSARRLEALLDSGAASGYRAEGL  
SVAVLGCGNSQWPTYQAFPRRVYEFFTNAGASPLLPRGEADGNGDFDQAAERWLASLWQA  
LQAGDSVGGPAHGTPPVRVQMRDVAEIRASTLPANTQGFTVLANTELVNDPSGLWDFSRE  
APRTSTRDIRLRLPAGVRYATGDHLAVYPQNQPGMVAALCERIGIDPDIAIVTSLASGGAA  
RGLPLGEALSVRQLLTHFVELQDVVSRQTLRLLSQSSRCPVTRQALQQLASDDAESGYAA  
QVAPRRLGLADVLDLRFPAIELDLAGLLACTVPMRPRFYSIASSPLVSPDVATITVGTVWS  
AALSGRGLFRGVASAWLQGLAPGAMVAGAIRTPNPAFAPAADPATPMILIGPGTGIAPFR  
GFLEERAAQQAAGQPVPVQLYYGCRHPAHDWLYRDDVARWQAQGVVQVHLACSVVDGEP  
RYVQDLLWQRRADVWARLNQGAIVYVCGDGRHMAPAVRQVLIQIGAEQGGMTPEAASDWL  
AELVSTGRYRQDVFN

>CNE\_2c12500|KEGG|CYP116B156|[Cupriavidus necator]cnc|BP

MAKPSPSAARSGCPIDHSALTAPNGCPVSHNAAQFDPFGDGYQQDPPEYVRWSREQEPVF  
YSPSLGYWVTRYQDIKAIFRDNLTFSPSIALEKITPTGDEANAVLASYGAMNRTLNE  
DEPAHMPRRRALMAPFTPAELAHHEPLVRRLAREYVDRFIDDGRADLVDQMLWEVPLTVA  
LHFLGVPEEDMDLLRQYSIAHTVNTWGRPKPEEQVAVAHAVGNFWQLAGRILDKMREDPS  
GPGWMQYGLRKQKDLPEVVTD SYLHSM MMAGIVA AHETTANASANA I K L L L Q H P D A W R E I  
CDDPSLIPNAVEECLRHNGSVAAWRRRLVTRDAEVGGIRLPAGSKLLIVTSSANHDERHFA  
DADLFDIRRDNASEQLTFGYGSHQCMGKNLARMEMQVFLEELTRRLPHMRLAGQTFTYVP  
NTSFRGPEHLLVEWDPAQNPERRD PALLSVHQPV RIGEPSAHTIARTV VVECVTPAADGV  
VRLRLAAPDGKPLPRWAPGSHIDVECGDTGLSRQYSLCGDPDDAAALEIAVL RDPDSRGG  
SAWVHGSVQAGDRLRIRGPRNHFRFDEGCKRAIFIAGGIGITPV SAMARRARALGTDYEF  
HYCGRSRQAMAMLDELQALHGARLQVHASDEGHRADFGKLLAQPDPR TQIYACGPQRM LD  
ALAECCA AWPEDALRVEHFVSKLGTLDASKEQPFTVELKDSGLVMEVPAGQTLLSALRGA  
NIDVQSDCEEGLCGSCEVRVL AGQVDHRDVVLTRSEREANQRMMACCSRACGGGRLVLEL

>CNE\_2c23570|KEGG|CYP229F9|[Cupriavidus necator]cnc|BP

MKRSPPRTRQTGSTSSPQRAAMQTATLPDTGIDPLRAVTDPPDPYPYYRELATRQPFYRDD  
RLGLWVAAGPREVAAVLAHPDCRVRPPAQPVPPALAGTAAGDLFGRLIRMNDGAAHAPLK  
QILMPMLAGLDAAATARRAAAMATMIDAGAAAGTSGERVNRWLFTLPVVTVADLLGLPIA  
EGGKAAEVAQRVAFAAAQSQLADAHTVRAGADAAQWLGAWLAGATPGDGPLPALHQAAH  
AAGIDAQAVAANIIGLLVQACEATAALAGNTLLRLGRDTPQSELPLDAVVARVAREDPPV  
QNTRRFLAADAQLCGHAVKAGDAVLVLLAAASCSGAAAGERPWTFGHGRHACPGDRVAQA  
LAAATVAALRARGADPAALAQAQAFRYRPSLNARIPHFL

>CNE\_BB1p04290|KEGG|CYP1077A2|[Cupriavidus necator]cnc|BP

MDLHDNSPAKATLSFDPAGSGHDAWSENFATSRKECPVFWSEAHGGYWTVANHESATRVA  
RDWQTFSSQKSWDPATGHHEGNAVIPSIPGPAFIPVETDPPLWKRYRLLLNPFFAPKAAE  
RFRPIAEEIATALMDRVIEKGSFDIVKDFSNPVPALTTLRILGIPFDADNWERFADPFHK  
LAYARELPEFPEVLANLEWIRGKLADLADACHQHPGDGLFSTLCHAEAE GASLSKQELVD  
IGMMLLVGGVGTTNALFANTMIYLDKHRAILERLVSNPDMLPIAIEEFVRFFSPVSGQAR  
LVKCPVDVGSQHMRPGEPLLLALSSANRDESVFRNPDEVMVDRMPNPHIGFGGGNHRCLG  
SFFAREMFTAMFREMTKRMPDYAVDHDRASTRYPCVASVNGWISAPARFTPGKKVGSVAVKL

>CNE\_BB1p08730|KEGG|CYP108S1|[Cupriavidus necator]cnc|BP

MNHNDFDLPGDVASVLVDPRAYADPVRLHAAYTWARENNPLGRAVNDGFDPPFWVTKHADVT  
AISRDHNLFHNGDYSVVCRPKAMIDHVIATTGSP  
NVVRALVHVDGDEHKGLRGLTQSWFMPNSILKLDERIRALARQIVDKLQKSDGNTIDFAKDIALHYPLHVIMDILGVPPED  
EARMMLTQELFGGE  
DPELKRAKQEQNPNANVSAQSMMAVVADFKDYFERVTADRRVNPRNDVATLLANAVVNGEPISEVSRLGYV  
IATAGHDTTSSSSAVAMWALSQF  
PELLPRLQADPSLISQFIDEAVRFASPVRRHFMRTATADTEIRGRKIRKGDWMLCYGSANRDEEVFEKPFDFNIDRKPNRHLA  
FGFGAHVCLGQHL  
AKMEMRILFEEMI PRLKRVEPAGQMELIASTFVGGPKHLPVRCVMQ

>CNE\_BB1p09050|KEGG|CYP107DG4|[Cupriavidus necator]cnc|BP

MNTATLSVRANPGPDTAIELRDPCCPILDAAFLRNPYPAYHRLRAAGPIHWSEEFFGGAW  
LLTRHEDVEAVLRDPLY SARRTGGWVMRGSEDERQALCPFQRLFSRAMLFLDAPDHMLRLR  
QALNAGFRPAALRAFAGTIEQMATGLMDRLEGTEQFDFMEGIAKPLPAMVIASLLGADAG  
DQPDFLAWSEDLAAFIGSPAPDQGLKRRQAASLLKMSAAFEALLARRRAQHATRPQTEQT  
DLIGHLLHAEAEGRIEAGPELLAQCAMLLFAGHETTRNLLGNGLHALLSHPEQWQRLRQS

PELLPNALRELLRYESPVQYTGRRVTTDMVLNGRRMQRGDLVVPLIGAANRDPARYRNP  
ELDITRREGSHLSFGHGPHVCIGAALTMEAEIAFRALLTRWPGLELVESEPHWNSNPVY  
RGLASLQVRHLS

>CNE\_BB1p09240|KEGG|CYP108S6|[Cupriavidus necator]cnc|BP  
MQTVFATTRNPGRKTKIYSGDTMKLDEFTLPAHIAETVVDPKAHADLDRLHAAYTWARAN  
NPLGCAEVEGYDPFWVVTKHADVALIGRDNQTFHSADRSVTCLPKEALDHIKSTTGNAEL  
IKSLVRLDDPEHKKLRALTMAWFMPNSILKLDERMALAKSTVDKMAAQSGGVVDFANDV  
AVHYPLHVIMDILGVPPPEDEPRMLMLTQQVLVGSDDPELGRDKGAAKGSKEKMDSRREVVA  
DFAQYFNGITADRRANPRNDVASLLANAVIDGEPLSDTLRLGYYILIATAGHDTTSSSTA  
TAMWQLSQSPELLSRLKADPSLISGFVDEAVRFISPVRHFMRTATTDVDLRGRRIRKGDW  
LMLCYASANRDEEVFDDPFVFNIDRKPNRH LGFGFGPHVCLGQHLAKMEMRILFEAMIPR  
LQWVEPAGEMNLVESNLVTGPKRLPVRYEMN

>BJN34\_26235|KEGG|CYP102E2|[Cupriavidus necator]cuh|BP

MPPPIELSSTEQAADTPSPSPAGTAREPIPVDPGLPLVGNLLQIKPGALGQHLLARSRHH  
DGIFELNFAGRRVPFVTSVALASEVCDATRFKRKYIGPPLSYLRGMAGDGLFTAHSDEANW  
GKAHRILMPAFSQRAMKGYFDVMLRVANRLVDKWDRQGPADIAVADDMTRLTLDTIALS  
GFGYDFESFARADLHPFIEAMVGALEEAMGKLTRFALQDRFMHAAHRKFDEDTRFMRDLV  
DDVIRRRRADGAAGPGHGTKNDDLGLMLEARDPDTQRLDDENIRNQVITFLIAGHETTS  
GLLTFALYELLRNPGVMAQAYA EVDVLPGDAAPIYADLARLPVLDRLVLETLRLWPTAP  
AFVAVPFEDTLLGGRYLIRKDRMSVVLTA LHRDPKVWADPERFDIDRFLPEREAQLPRH  
AYMPFGNGERACIGRQFALTEAKLALALMLRNFQFTDAH DYQFRIKETLTIKPDGLTVRA  
RRRRPHERIAAAQATATTQAVQAGPEVLGGGRPLAVLCGSSLGTARELAEQVHAGAVAAG  
FDATLRDLDEVADALPATGLAVIIAATYNGRAPDSARRFEALLDSGAASGYRAQGLRVAV  
LGCGNSQWPTYQAFPRRVYDFFTQAGATPLLPRGEADGNGDFDQAAERWLALLWQALQAG  
DGADGPAHGTPAIRVQVKDVAEIRASTLPANTQGFTVLANAELVNDPTGLWDFAREAPRT  
STRDIRLRLPEGVRYATGDHLAVYPQNQPEIVTALCERIDIDPD AIVTLSAPGGTARGLP  
LGEALSARQLLTHFVELQDVVSRQTLRLLSQHSRCPVTRQALQQLASDEAETGYAAQVAS  
RRLGLADVLD RFP AIELDLAGLLACAVPMRPRFYSIASSPLVSPDVATITVGMVWSPALS  
GRGLFRGVASTWLQGLAPGAMVAGTIRTPNPAFAPAADPATPMILIGPGTGIAPFRGFLE  
ERAAQQAAGQAVAPVQLYYGCRHPLHDWLYRDDVERWRAQGVAQLHLACSVVDGEPRYVQ

DLLWQRRADVWTRLGEGAIVYVCGDGRHMAPAVRQVLLQIGAEQGGMTPEAASDWLAELV  
STGRYRQDVFN

>BJN34\_28050|KEGG|CYP116B155|[Cupriavidus necator]cuh|BP  
MANPSPGTARGCPIDHSAFTAPNGCPVSHNAAEFDPFGDGYQQDPPEYVRWSREQEPVFY  
SPKLGYWVTRYDDIKAIFRDNLTFSPSIALEKITPTGDEANAVLASYGAMNRTLNVNED  
EPAHMPRRRALMAPFTPAELAHHEPLVRRLAREYVDRFIDDGRADLVDQMLWEVPLTVAL  
HFLGVPEEDMDLLRQYSIAHTVNTWGRPKPEEQVAVAHAVGNFWQLAGRILDKMREEPSG  
PGWMQYGLRKQKDLPEVVTD SYLHSMMA GIVAAHETTANASANA I K L L L Q H P D A W R E I C  
EDPSLI P N A V E E C L R H N G S V A A W R R L V T R D A E V G G I R L P A G S K L L I V T S S A N H D E R H F A D  
ADLFDIRDNASEQLTFGYGSHQCMGKNLARMEMQVFLEELTRRLPHMRLAQQTFTYVPN  
TSFRGPEHLLVEWDPAQNPERREPALLDVHQPVRI GEP SAHTIARAVVVERVTPAADGVV  
RLRLAAPDGKPLPRWAPGSHIDVECGDTGLSRQYSLCGDPDDAGALEIAVLHDPDSRGG  
AWVHGSVNAGDRLRIRGPRNHFRFDEGCGR A I F I A G G I G I T P V S A M A R R A R A L G I D Y E F H  
YCGRSRQAMAMLDELQALHGARLHVHASDEGRRADFGKLLAQPDPR T Q I Y A C G P Q R M L D A  
LTDCCA A W P E D A L R V E H F V S K L G T L D A S K E Q P F T V E L K D S G L V M E V P A G Q T L L S A L R G A N  
IDVQSDCEEGLCGSCEVRVLAGQVDHRDVVLTRSEREANQRMMACCSRACGGGRLVLEL

>BJN34\_31475|KEGG|CYP108S1|[Cupriavidus necator]cuh|BP  
MNHTDLDLPGDVAKVLVDPRAYADPARLHAAYAWARANNPLGRAVNDGFDPFVVTKHAD  
VTAISRDNLFHNGDYSVVC R P K A S I D H V I A T T G R P N I V K A L V H V D G D E H K G L R A L T Q S W  
FMPNSILKLDERIRGLARQTVDKLQQSDGSTIDFAKDIALHYPLHVIMDILGVPPEDESR  
MLLLTQELFGGEDPELKRAKQEK S A D D G A M A K S L M A V V A D F R D Y F E K V T A E R R V N P R N D V  
ATLLANAVVNGEPISEISRLGYYVIIATAGHDTTSSSSAVAMWALSQYPELLPRLQADPS  
LIPQFIDEAVRIASPV RH F M R T A T A D T E I R G R K I R K G D W L M L C Y G S A N R D E E V F D Q P F D F  
NIDRKPNRHLAFGFGAHVCLGQHLAKMEMRILFEELIPRLQRVEPAGEMEMIASCFVGGP  
KHLPVRCVM

>Reut\_B5115|KEGG|CYP229F13|[Cupriavidus pinatubonensis]reu|BP  
MMPADPREAVTAPDPYPYRALAT R Q P F G F D E R L G L W V A A G R A E V A A V L A H P D C R V R P L S  
QPVP TALAGTAAGELFGRLIRMNDGAAHAPLKAILMRLMASMDAATAKTR S A G L A G V L D L  
VPDMAPLNGATINRWLFTLPVVTVADLLGLPV R A G A D A M A V A A R V A A Y A A A Q S P L A T A G D  
VEAGADAARWL G Q W L K M P A G R P C P A E D L G L L P A L R Q A A H A D D I A P E V V A A N V I G L M V Q A C



EATAGLAGNMLVRLGRSSPTTRGLDELAVRVAIDDPVQNTTRFLAADARVCGVPVRAGD  
AVLVLLAAASCAAPVEAGARPWTFGAGRHACPGDALARALAAATVDALLARGAQPTALAQ  
AFRYRPSHNARIPHFL

>Reut\_B5278|KEGG|CYP116B160|[Cupriavidus pinatubonensis]reu|BP

MTAATPETTTQKCPFSHGAQPAAAAPNGCPVSAEAAAFDPFGDGYQQDPPEYVRWSREQE  
PVFYSPQLGYWVTRYDDIKAIFRDNLTFSPAIALEKITPTGPEANAVLASYGAMNRTL  
VNEDEPAHMPRRRALMEPFTPEQLKHHEPLVRKLAREYVDRFIDDGKADLVDQMLWEVPL  
TVALHFLGVPEEDMDLLRQYSIAHTVNTWGRPKPEEQVAVAHAVGNFWQLAGRILDKMRA  
DPSAPGWMQYGIQKQKELPEVVTDSYLHSMMAAGIVAAHETTANASANAIAIKLLLQHPDVW  
REICEDPALIPNAVEECLRHNGSVAAWRRVTRDTEVGGIPIAAGSKLLIVTSSANHDEA  
HFADADLFDIRRENAADQLTFGYGSHQCMGKNLARMEMQIFLEELTRRLPHMRLAQQSFT  
YLPNTSFRGPEHLWVEWDPAQNPERTQPSLLAQQTTPVRIGEPSGQAISRPVVVQSVTQAA  
DGIVRLRLASPDGKAMPRWSPGSHIDVDCGETGLSRQYSLCGDPAETGVLEIAVLREPES  
RGGSAWIHDHVKPGDRLKIRGPRNHFRMDEGCRKAIFIAGGIGITPVSAMARRALALGID  
YEIHYSGRTRTGMAMIDELRALHGERLHLYIKEEGGRNDLDALLARTDRNAQIYACGP  
MVEALEQACTGWPDDALRVEHFATTLGLTDPskeQPFEVELKDSGLTVTVPADQTLLTTL  
RCAGIDIQSDCEEGLCGSCEVRVLSGSVDHRDVVLTRGEREANTKMMTCCSRALPGSRLI  
LEL

>Rmet\_3467|KEGG|CYP102E1|[Cupriavidus metallidurans]rme|BP  
MSTATPAAALEPIPRDPGWPIFGNLFQITPGEVQGHELLARSRHHDGIFELDFAGKRVPFV  
SSVALASELCDATRFRKIIGPPLSYLRDMAGDGLFTAHSDEPNWGCAHRILMPAFSQRAM  
KAYFDVMLRVANRLVDKWRQGPADIAVADDMTRLTLDTIALAGFGYDFASFASDELDP  
FVMAMVGALGEAMQKLTRLPIQDRFMGRAHRQAAEDIAYMRNLVDDVIRQRRVSPTS  
GMDLLNLMLEARDPETDRRLDDANIRNQVITFLIAGHETTSGLLTFALYELLRNPGVLAQAYA  
EVDTVLPGDALPVYADLARMVLDRLVKETLRLWPTAPAFAPFDDVVLGGRYRLRKDR  
RISVLTALHRDPKVWANPERFDIDRFLPENEAKLPAHAYMPFGQGERACIGRQFALTEA  
KLALALMLRNFAFQDPHDYQFRLKETLTIKPDQFVLRVRRRRPHERFVTRQASQAVADAA  
QTDVRGHGQAMTVLCASSLGTARELAEQIHAGAIAGFDAKLADLDDAVGVLPTSGLVVV  
VAATYNGRAPDSARKFEAMLDADDASGYRANGMRLALLGCGNSQWATYQAFPRRVFDFFI  
TAGAVPLLPRGEADGNGDFDQAAERWLAQLWQALQADGAGTGGLGVDVQVRSMAAIRAET

LPAGTQAFTVLSNDELVGDPISGLWDFSIEAPRTSTRDIRLQLPPGITYRTGDHIAVWPQN  
DAQLVSELCEERLDLDPDAQATISAPHGMRGLPIDQALPVRQLLTHFIELQDVVSRQTLR  
ALAQATRCPFQTKQSIEQLASDDAEHGYATKVVARRLGILDVLVEHPAIALTLQELLACTV  
PMRPRLYSIASSPLVSPDVATLLVGTVCAPALSGRGQFRGVASTWLQHLPPGARVSASIR  
TPNPPFAPDPDPAAPMLLIGPGTGIAPFRGFLEERLRKMAGNAVTPAQLYFGCRHPQHD  
WLYREDIERWAGQGVVEVHPAYSVVPDAPRYVQDLLWQRREQVWAQVRDGATIIYVCGDGR  
RMAPAVRQTLIEIGMAQGGMTDKAASDWFGGLVAQGRYRQDVFN

>Rmet\_3820|KEGG|CYP229F12|[Cupriavidus metallidurans]rme|BP  
MPPNASLAPADPIAAVTHADPYPYRDLASTRPFYFDPALKLWVAASAAVAEVLDHADG  
RVRPAAQPVPPSLAGSAAAGDLFGRILRMNDGVAAHAPLKAIVARQMAALDLSDARSARAL  
AAALPRVDHDDAHEANRWMFTLPVLAIAADLLGLPLERDTDGHVSTRVAGFVATFAAAMSP  
LASPADVEAGVAAAQWLTRLAQTAEDRETADIGVLAALAAQAGGDSKMDPATLTANAIGLM  
IQSCEATAGLIGNTLVYLGRSDWQGADIGASVDRVARIDPPVQNTRRFMAADAMLCGQQV  
KEGDAVLVLLAAAHAHDPSSAAEERAWTFGAGRHCPCGDALARVLATCTVDALLARDVHPD  
RLAAGVRYRPSVNARIPSFSSNN

>Rmet\_3868|KEGG|CYP212A2|[Cupriavidus metallidurans]rme|BP

MTTESQAQCPFQTAKSPPPAGSPLPHPYGTWPPGPAAGLTGWHLLRRMSRDLLGTLGEWQ  
QTYGDVVHLRMWPEHAVVVTDPQLVRELLVTHHDSLIRWERGTRVFSRVHGHSVLTAEGD  
AWSRKRQALQPGFMPKAVHGFVPGIVEIVDKGLATWPTRVADWPVESALTSLTMDVIVRM  
MFSDEIGEDARVAECAVRAISEAANADFYWPASLPDWVPWKRARRRALHTLRDLIERHLQ  
ARLRMRTDTWPDDLLSRLCLHRDDATAWPLQAVRDECMTTFLAGHETTAATLTWWAWCM  
ASNPSAQDAARAEVTHVLRGQAPTADSRQALRQVVQTITESMRLYPVAPVLISRAVRPI  
TLGPWRLPARTLFMLPLQLMHHDPRFLFPEPERFQPDREFSTGSPQAPRGAYMPFGTGPRVC  
LGQHLATAEMTVIAAMLLQRYKLSVPEGAHPRPLLNVTLRPDQPLWLAVTPI

>Rmet\_4932|KEGG|CYP116B1|[Cupriavidus metallidurans]rme|BP

MPQTNAPASSGSCPIDHSALRAPNGCPISHQAAAFDPFEDGYQQDPPEYVRWSRAQEPVF  
YSPKLGYWVTRYDDIKAIFRDNITFSPSIALEKITPTGEAANAVLASYGAMNRTLNE

DEPAHMPRRRALMEPFTPAELAHHEPMVRKLTREYVDRFIDTGRADLVDEMLWEVPLTVA  
LHFLGVPEEDMDLLRQYSIAHTVNTWGRPKPEEQVAVAHAVGNFWQLAGRILDKMREDPS  
GPGWMQYGLRKQRELPEVVTDSYLHSMMA GIVAAHETTANASANA I K L L L Q H P D V W R E I  
CEDPALIPNAVEECLRHNGSVAAWRRLVTRDTEVGGMSLAAGSKLLIVTSSANHDEHHFA  
DADLFDIHRDNASDQLTFGYGSHQCMGKNLARMEMQIFLEELTSRLPHMRLAGQRFTYVP  
NTSFRGPEHLWVEWDPARNPERTDPTVLAPRDAVRIGEPTGGTTGRTLIVERVETAAQGV  
SRIRLVSPDGRALPRWSPGSHIDIECGHTGISRQYSLCGDPADTSAFEIAVLREPESRGG  
SAWIHASLRAGDKLKVRGPRNHFRLDETCRRAIFIAGGIGVTPVSAMARRAKELGVDYTF  
HYCGRSRASMAMIDELRALHGDRVRIHAADEGQRADLAQVLGAPDANTQIYACGPARMIE  
ALEALCATWPEDSLRVEHFSSKLGTLDPSREQPFAVELKDSGLTLEVPPDQTLLATLRAA  
NIDVQSDCEEGLCGSCEVRVLAGEIDHRDVVLTRGERDANNRMMACCSRAAKGGKIVLGL

>Rmet\_5516|KEGG|CYP108E1|[Cupriavidus metallidurans]rme|BP  
MTIASDFDTELASHEIYSDPERMHMFETLRREDPVHWTAPGHPPFWAVTKQADVIEVG  
KHPDVFIASPKSFLMNDVEQRVRIETAATGGKLVRTMIHMDDPDHKKYRGLTQSYFMPA  
NIKRLESVIQERARALVGR LIEKGTSEFCSEIAVWYPLQIVMTLLDVP ESEHPYLLKLTQ  
QFLAPKDPTLRRDGPDERGKGAVAK EYFAYFGKMLAERRAAPLKEDLGSLIAHATVDGEP  
LPLMEAVSYYVILATAGHDTTSSSMCSGLYLLTQPGELDRRLRARPELMPSAIEEMFRHG  
SPVKHFVRTATRDFELRGKKIQAGDEVALMYHSASFDEEVFDEPRSFRI DRGPNKHVAFG  
FGIHACLGQNLARASMR TFFTELLARTESIEVVGKAEFIASNQVGGMKTLNIRVTPSKQS  
TTDRIEVAA

>RALTA\_B1182|KEGG|CYP116B170|[Cupriavidus taiwanensis]cti|BP

MTTPSPGAARGCPIDHSMLTAPNGCPVSHNAAQFDPFGDGYQQDPPEYVRWSREQEPV FY  
SPQLGYWVTRYDDIKAI FRDNLTFSPSIALEKITPTGDEANAVLAS YGYAMNRTL VNED  
EPAHMPRRRALMAPFTPAELAHHEPLVRRLTREYVDRFIDDGRADLV DQMLWEVPLTV AL  
HFLGVPEEDMDLLRQYSIAHTVNTWGRPKPEEQVAVAHAVGNFWQLAGRILDKMREDPSG  
PGWMQYGLRKQKELPEVVTDSYLHSMMA GIVAAHETTANASANA I K L L L Q H P D A W R E L C  
EDPALIPNAVEECLRHNGSVAAWRRLVTRDAEVGGIRLPAGSKLLIVTSSANHDERHFAD  
ADLFDIRDNASEQLTFGYGSHQCMGKNLARMEMQVFLEELTRRLPHMRLAEQTFTYVPN  
TSFRGPEHLLVEWDPAQNPERRD PALLAVRQPVRIGEPSAHTIARTVVVERATPAADGVL

RLRLAAPDGKPLPRWAPGSHIDVECGDTGLSRQYSLCGDPDDAAALEIAVLRDPASRGG  
AWVHDHVRAGDRLRIRGPRNHFRFDEQCRRAIFIAGGIGITPVSAMARRARALGIDYTFH  
YCGRSRQAMAMLDELQALHGARLHVHASNEGRRANFGKLLGQPDADTQIYACGPQRLLDA  
LAECMAWPADALRVEHFVSRLGSLDASKEQAFTVELKDSGLVLEVPAGQTLLGALRGAN  
IDVQSDCEEGLCGSCEVRVLAGQVDHRDVVLTRAERDANHRMMACCSRACGGGRLVLEL

>RALTA\_B2169|KEGG|CYP229F15|[Cupriavidus taiwanensis]cti|BP

MPETITDPFADIDPFSAVTHPDYPYRELAATRPFREQRLGLWIAAGSSEVAAVLAHP  
DCRVRPPAQPVPPALAGTAAGDLFGRLIRMNDGAAHAPLKALMPMLAAVAPGVAAQKAA  
AMAOVLDAEGAHVAMPAASVNRWLFALPVVTVAAVLGLPVARDHGTAVEVAQQVAAFAA  
AQSPADADTVRAGAEAAARWLGTWLASSLASSVAADGPLSALQHAAQAAGIDAQAVAANI  
IGLLVQACEATAGLAGNTLLWLGRNPSASGMPLQGVARVAQDDPPVQNTRRFLAADTQL  
CGHAVKAGDTVLVLLAAASTSGLADDARAWTFGQGRHACPGDRLAQALAGATVAALCARG  
ADPAALARAFRYRPSQNARIPHFL

>pRALTA\_0449|KEGG|CYP108S3|[Cupriavidus taiwanensis]cti|BP  
MFILAPITTTSNFDLPDDIAKLLVDPKTYSDRELLHSVYTWARANNPFGRAVIEGFDPFW  
VATKYADVSAISRDSLSFRNGDYSVVCRPKAAIDYIISVTGSPHIVKALVQFDGDEHKKM  
RALAQSWFMPDSLNLDERIRRLARCCVDKLAHYEGEVIDFSRNIALYYPLHVIMDILGI  
PSEDEAKMLVLTQELFGGEDPELNRGKAEVASGKDVLAKNLLAVVEDFRHYFDKLTSDKR  
TSPRNDMATLLSNAVVNGEPISDANRLGYIIIIATAGHDTTSSSSAIAMWALSQFPDLLP  
RLQADAALIPQFVDEAVRFASPVSHFMRTASADTEIRGRTVHKGDWIMLCYGSANRDEDV  
FDKPFESIDRKEVHHLAFGTGPHICLGQHLAKMEMRILFEEMIPLRERVESAGELEMVA  
SSFVGGPKHLPLRCFMR

>RR42\_m2044|KEGG|CYP107DG5|[Cupriavidus basilensis]cbw|BP

MSAPARLATFARLGMHAQMEAEAQTEAVIEKPASCRPFVDATFLHDPYPLYRELREAGPI  
HWSEEFFGGAWLLTRHDDVEAVLRDPLYSARRTGGWVMRGNEESRQTLCPFQRLFSRAML  
FLDAPDHTRLRQVLNAGFRPSTLRASAGAIEHMOVAGLMSGIDEAGPFDPMERIARPLPAM  
VIARLLGMDAADQPEFLAWSEDLAAFIGAPDPDQGLKRQAQVSLLKLSAAFEAMLARRRE  
QGATVLDAAAGDDLIGHLLRAEASGEVESGAELLAQCAMLLFAGHETTRNLLGNGLYALLS

HPDQWRRLQRAPELLPNALRELLRYESPVQYTGRRVTTDVVLHGRRLRRGELVVPLIGAA  
NRDPARYSNPDSLDIRREGSHLSFGHGPHFCIGAALTLMEEIVFRALSARWPELALLD  
ASPHWNGNPVYRGLASLQIRCLP

>RR42\_m3629|KEGG|CYP116B151|[Cupriavidus basilensis]cbw|BP

MANATPNPHASGCPVDHRLTLTAQRSPTGCPVSPGAASFDPFEDGYQQDPPEYVRWAREQE  
PVFYSPKLGYWVVTRYDDIKAIFRDNLTFSPSIALEKITPTGPQANAVLASYGAMNRTL  
VNEDEPAHMPRRRVLMAFFTPEELKHHEPMPVRKLAREYVDRFVDDGRADLVDQMLWEVPL  
TVALHFLGVPEEDMDLLRKYSIAHTVNTWGRPRPEEQVEVAHAVGNFWQLAGKILDKMRQ  
DPSGPGWMRYGIRKQVEYPEIVTDSYLHSMMAAGIVAAHETTANATANAMKLLLQHPRAW  
QEICEDPGLIPNAVEECLRHNGSVAAWRRLATRDVQVGGVDIPAGAKLLIVTSSANHDER  
HFADADLFDIRRENASDQLTFGYGSHQCMGKNLARMEMQVFLEELTRRLPHMRLAEQSFS  
YVPNTSFRGPEHMMWVEWDPKQNPERRANPALLEVQVPVRIGEPLGHASRPVVVASATRAA  
EGIVRLRLVSPDGKPMPRWAPGAHIDVECGGTGLSRQYSLCGDPDDNSALEIAVLREAQG  
RGGSAAVHDSAKAGDRLKIRGPRNHFRLEAAGRLILIAGGIGITPVSAMARRAKALGMD  
YALHYSGRSRASMLLDELIALHGDRHLVYVKDEGRNRNDFASLLGQPQADTQIYACGP  
MLAALQQQCAGWPGDALRIEHFESTLATLDPGQEQAFEAECLKDSGIVVAVAPGQTLAAL  
RAANIDMQSDCEEGLCGSCEVRVLAGEIDHRDVVLTRAEREANTKMMACCSRAKCQRIVL  
EL

>RR42\_m4058|KEGG|CYP102E3|[Cupriavidus basilensis]cbw|BP

MQRASTPASAAPAATSATIPAAQPARSLEPIPRDPGWPLVGNLLQVTPGKVGQHLLARSR  
AFDGFIFELDFAGRRVAFVSDAALVGELSDGQHFRKIVGPPLSYLRDLAGDGLFTAHAE  
NWGRAHRIIMPAFSQRAMKGYFDVMLRVANRLVDKWRQGADTDIPIADDMTRLTLDTIA  
LSGFGYDFDSFSREQLHPFIDAMVGALEEAMGKLTRFALQDKFMHKAHRKFADDIQYMR  
LVDDVVRQRRAAAGNHAGQPPAHDLLNLMLEARDPETDQRLDDVNIQNQVITFLIAGHET  
TSGLLTFFALYELLRHGVLQAQYAEVDAVLPGDAQPVYADLAKLQVIDRVLKETLRLWPT  
APAFAVAPLEDTVIGGRYLIRKDRRVSVVLTALHRDPKVVADPETFDIDRFLPENEARIH  
PHAYKPFNGERACIGRQFALTEAKLALMLRNQFSDPHDYQFRIKETLTLKPDAFTL  
RARRRRRAHERIAAAPAPGAASVQSQPPAVRGNGQPLAVLCGSSLGTARELAEQIHAGALA

AGFAATLRDLDEAVGALPTDGLAVIVAATYNGRAPDSARRFEAMLDSGDAGGYRAQGLRF  
ALLGCGNSQWATYQAFPKRLHDFSAAGAAPLLARGEADGNGDFDQAAESWLAALWQSLQ  
ALRVEQGAAPDAAGASQIEVRLRDIATIRASTLPPSAQAFTVLANTELVNDPAGLWDFAL  
EAPRTATRDIQLRLPEGASYATGDHLAVYPRNHPATVRDLCERLDLDPDAMVTLSPAAPGC  
AARGPLPLDEALPLRELLTHFIELQDVVSRQTLRTLLQYTRCPFTRAALERLGSDHAQEGY  
AARVASQRLGLVDVLVSHPAIALTLPGLLACTVPMRPRFYSIASSPLVSPDVATITVGTV  
WSPALSGRGMFRGVASTWLQGLAPGAVVAAAIRTPNPAFAPDPDPARPMILVGPGTGIAF  
FRGFLEERAAQKAAGRAVAASQFYYGCRHPGHDWLYRDDVARWQAEGVVQAHAAYSTTPA  
ADQRYVQHLLWRDRQAIWAMLQDGATIYVCGDGRQMAPAVRRTLIEIAAQGGMSEAAAS  
DWLAGMVAQGGRYRQDVFN

>RR42\_s0745|KEGG|CYP116F1|[Cupriavidus basilensis]cbw|BP

MSENKAQVSRCPFSAAAKNFDPFDPFLEQPFSTLKEKRESEPVFFDEKLGWVVTMRDD  
AKAILRNQKDFSADIVLDPVPLYQSTIENFMRSFGFHGGGSLVNDVNPEHDERRKWLAK  
SLTPQRVKELEPFVREAVVKCIDGFVKDGEVDLVKMLGNQVPAVLLNFLAIPQEDLERV  
KAWAEPTILFSWGHPTESDQNHMADMLGEFWHYCKAHIAKLRDNLGDDVVSEAIRGQQEK  
SLWTDDELTRMVLNFTFAGHDTTNAANMFETLMKHRESWDDLCRNPALIPNAVEECIR  
FAPSVISHRRRAVNNITIGSAEIQANDKILIYFAAANRDDATFANGDTFDIHRDGPNRHV  
TFGFGWHACYGAPLARLELRIMLEEMTKRLPHIHLKPHQRFEYAPLNTTMRGPSHVYVQW  
NPALNPLPLDRPSN

>RR42\_s1885|KEGG|CYP105CW1|[Cupriavidus basilensis]cbw|BP

MHAGGDSGIPDFPPERVDPLSPPPVYFQMQQGSGLGQARLWDGKIAWLITRYDDVRSVLS  
DPRFSSDITNPGYPTVSAAMKVARGSNRTFITMDAPKHAEHRRMLTGEFSIRKIEALRPR  
IQAIVDKLLDDFATKPQPSDLVSAFTLATPALAISELLGVPYEDHDFQELAMVLTSSSA  
TLEEAIANHELCEVYLKGLVAKRSENPGEDILSRILVNHVRKGDITETDVVSLARLLLI  
AGHETTANTTAMGVFLLLQRPDIWNELRQDTSLPVNAVEEILRYLDVTHSGKRRVATEDI  
VVNGQMIQAGDPVVVLSVSANRDSKSFEDPNVFDLRRDSRTQVSFGYGPHQCIGQPLARL  
EMQIMFTALLERFPNLELAVPVESLEFKGDSL MYGVKELPVRW

>RR42\_s1901|KEGG|CYP105CW2|[Cupriavidus basilensis]cbw|BP

MTESPAPTPSSNPSSAVEGRCPFDAAANEPKSACPFHAEGDSGGIPDFPPKRVDPLAPPP  
VFFQMQQKGELAQQKLDGKIAWLVTTRYDDVRAVLSDSRFSSDVSHPGFPSSSAVKVVR  
SSNRTFITMDEPKHSEQRRMLTSEFTIRKIENLRPRLQAIVDKLLEDFAMGPQPSDLVSA  
FTLATPALAISELLGVYDDHDFEQEQAMIMTSSTATREEASAANQALCEYLRELVAKRS  
ESPGEDILSRLIVNHVRKGDITETDVVSLGRLLLLIAGHETTANTTSMGVLFLLQRPDIWE  
ELRQNPSLVPNAVEEMLRFLDVIQSGTRRVALEDVVVNGQLIRAGDPVVVLSISANRDQE  
QFKDPHVFDLRRDARTQIAFGYGPHQCMGQVLARVEMQIMFTALLKRLPNLRLAVPIESL  
AFKSDSLMYGVRALPVSW

>RR42\_s3363|KEGG|CYP1263B1|[Cupriavidus basilensis]cbw|BP

MPLPTAMPMPDPLCAVTHPDPAFYRILAAQRPFYRDEALGLWVASGAAEVQAVLAHPA  
CRVRPPAQAVPPALAGSPAGTLFGGLIRMNDGDWHAPLKGVLRKRMACLALAGMGARVLA  
LAQDLPFDAVRPGAAVNHWMFTLPVLAVADALGLPMTGKPSVAGQVVAFAFARAMSPLATAQ  
EIAAGSEAATWLQAWMRASLSSAPPLDALVHEALAAGVAREIIAANAIGLLIQACEATAG  
LVGNMLLCLGRDTSHGRRPALDCVAARVLREDPPVQNTRRFLAADVRLCGAQLQAGDTV  
LVVLAAASLGQREAATPAPWTFGRGHHACPGDALASTVAQAVVAALLARGADPASLAHAF  
RYRPSVNARIPLYFL

>CR3\_4046|KEGG|CYP116B11|[Cupriavidus gilardii]cgd|BP

MSERTEPARAQGCPFHVQPHGQANASADAVATPLSPTGCPVSARAADFDPFEDGYQQDPP  
DYVRWAREQEPVFYSPRLGYWVTRYDDIKAIFRDNLTFSPSIALEKITPTGDEANAVLA  
SYGYAMNRTLNVNEDEPAHMPRRRVLMPEFTPEQLQHHEPMVRRLTREYVDRFIDDGKADL  
VDQILWEVPLTVALHFLGVPEEDMDLLRKYSIAHTVNTWGRPKPEEQVEVAHAVGNFWQL  
AGRILDKMRQDPSGPGWMQYGIRKQKEYPDVVTDSYLHSMMAAGIVAAHETTANASANA  
KLLLQHPDAWRELCEDSLIPNAVEECLRHNGSVAAWRRLATRDVQIGGVDPAGAKLLI  
VTSSANHDERHFADADLFDIRANASDQLTFGYGAHQCMGKNLARMEMQIFLEEFTRRLP  
HMRLEQKFTYVPNTSFRGPEHLWVEWDPSQNPERRNPALLQVRTPVIRIGEPSSHAINRT  
VVVESVTRVADDIVRLRLVSPDGKPLPRWSPGSHIDVECGDTGMSRQYSLCGDPADSRAF  
EIAVLREADSRGGSAAWIHRELKAGDRLRIRGPRNHFRLLDESARRLILIAGGIGITPISAM

ARRAKELGIDYQLHYCGRGRASMLLDELAALHGDRHLHVKDEGARADLGALLGQPD  
AE  
TQIYACGPARMLDALAACCASWPQDALRVEHFTSTLGALDPSKEQAFEAELKDSGII  
VTV  
RADQTLAALRAANIDVQSDCEEGLCGSCEVRVLAGEIDHRDVVLTRAEREANGK  
MMSCC  
SRARCGRIVLEL

>CR3\_4532|KEGG|CYP229D7|[Cupriavidus gilardii]cgd|BP

MTHRAPHYRYRELARQQPFHRDAMLMLWVAAGPAEVAAVLSHPACRVRPPGQPVPP  
PLAQ  
SPAGTLFARLIRMNDGQRHAPLKAVLQRQLATLDPEDVRAAASASARLLPVTDDHA  
ATAN  
RWTGALPVIAIAHLLGFTAVDDVTGCRIATQIASFAAAMSPLAGPAEIEAGIEAA  
ASLQ  
TLPLRADTPWAKALCAEARAAGVDDDAIAANLLGLMVQSCEATAGLIGNTLLWL  
AHDA  
AAA  
ADDLPPTTVATVLRADPPIHNTRRFMAEDARVCGVPLRRGDGILVLLAAAAAA  
ASEVRIDN  
VSASVNTPGKRGERPWTFGHGAHRCPGDALAAALAEATVAALLARGIEPAVLAQ  
AYRYP  
SLNARIPHFL

>BKK81\_01125|KEGG|CYP102E5|[Cupriavidus sp.]ccup|BP

MTQAATSSSQAPVAGRPAASLQPIPRDPGWPLVGNILQIKPGAFQAHLMARARA  
HEGIFE  
LDFAGRRVPFVTSAAALAAELADAARFRKFIGPPLSFLRDVAGDGLFTAHTDEAN  
WGRAHR  
ILMPAFSQRAMKGYFDVMLRVAMRLVDKWDRQGPADIAVSDDMTRLTLDTIALSG  
FGYD  
FDSFASQQLHPFIDAMVGALEEAMGKLTRFPLQDRFMHAAHRKFAEDTRFMREL  
VDDVIR  
QRRQSPTPARDLLNLMLEARDPETDQRLDDVNIRNQVITFLIAGHETTSGLLT  
FALYELM  
RHPGVLAQAYAEVDAVLPGDAPPAYADLARLQVLDRVLKETLRLWPTAPAFSVAP  
FEDTV  
IGGRYRIHKDRRVAVVLTALHRDPAVWDDPERFDIDRFLPENEARIHPHAYKPF  
GNGERA  
CIGRQFALTEAKLALALMLRHFQLHDPHDYQFRIKETLTLKPDHFLLRARRRR  
PHERIVV  
AAPASGAVTAAARPVVAAGGETLAVLCASSLGTARELAEQVQAGALAAGYEATL  
HDLDD  
ALGKLPTQGLAVIVAATYNGRAPDNARRFEAMLDAAAGDAPGDWRAGGLRYAVL  
GCGNSQW  
ATYQAFPKRLDTFFAAAGARPLLARGEADGNADFQAAEQWLAALWSALAQQQ  
PHAPGPA  
PGAEGAPPLAVEVALRGIDEIRASVLPSNTQPFVLANRELVS DPAGLWDFAVEAP  
RTST  
RDIRLRLPEGARYAAGDHLAVYPQNRPALVHDL CERLDDPEAVVTL SAPRAGA  
ARGLPL  
GQPLPLRALLTHFVELQDVVSRQTLRLLAQRT RCPFT RQSLERLGSDDA AQGYAA  
QVAAH  
RLGLPDLLARFPAIELDLAGLLACVVPMPRPRFY SIASSPLVSPDVATLT VGT  
VLAPALSG  
RGQFRGVASNWLQGLAPGATVAAAIRTPNPPFAPEADPAQAMILIGPGTGIA  
PFRGFLEE



RAAQQAAGQAVAPVELYFGCRHPQHDWLYRDEMLAWQAQGVARLHVAHSATGAPARFVQD  
LLWQQRAELWRQLSAGAVAYLCGDGRQMAPAVRKTLMEDIAVAEGGLDGDAAAWFAGLVA  
EGRYRQDVFN

>BKK80\_00460|KEGG|CYP102E5|[Cupriavidus malaysiensis]cup|BP

MTQAATSSSSQAPVAGRPAASLQPIPRDPGWPLVGNILQIKPGAFAQHLMARARAHEGIFE  
LDFAGRRVPFVTSAALAAELADAARFRKFIGPPLSFLRDVAGDGLFTAHTDEANWGRAHR  
ILMPAFSQRAMKGYFDVMLRVAMRLVDKWDRQGPADIAVSDDMTRLTDLTIALSGFGYD  
FDSFASQQ LH PFIDAMVGALEEAMGKLTRFPLQDRFMHAAHRKFAEDTRFMRELVDDVIR  
QRRQSPTPARDLLNLMLEARDPETDQRLDDVNIRNQVITFLIAGHETTSGLLTFALYELM  
RHPGVLAQAYAEVDAVLPGDAPPAYADLARLQVLDRLVKETLRLWPTAPAFSVAPFEDTV  
IGGRYRIHKDRRVAVVLTALHRDPAVWDDPERFDIDRFLPENEARIHPHAYKPFNGGERA  
CIGRQFALTEAKLALALMLRHFQLHDPHDYQFRIKETLTLKPDHFLLRARRRRPHERIVV  
AAPASGAVTAAAARPVVAAGGETLAVLCASSLGTARELAEQVQAGALAAGYEATLHDLDD  
ALGKLPTQGLAVIVAATYNGRAPDNARRFEAM LDAAGDAPGDWRAGGLRYAVLGCNSQW  
ATYQAFPKRLDTFFAAAGARPLLARGEADGNADFQAAEQWLAALWSALAQQQPHAPGPA  
PGAEGAPPLAVEVALRGIDEIRASVLPSNTQPF TVLANRELVS DPAGLWDFAVEAPRTST  
RDIRLRLPEGARYAAGDHLAVYPQNRPALVHDL CERLDDL DPEAVVTLSAPRAGAARGLPL  
GQPLPLRALLTHFVELQDVVSRQTLRLLAQRT RCPFTRQSLERLGSDDAQQGYAAQVA AH  
RLGLPDLLARFPAIELDLAGLLACVVPMPRPFYSIASSPLVSPDVATLTVGTVLAPALSG  
RGQFRGVASNWLQGLAPGATVAAAIRTPNPPFAPEADPAQAMILIGPGTGIAPFRGFLEE  
RAAQQAAGQAVAPVELYFGCRHPQHDWLYRDEMLAWQAQGVARLHVAHSATGAPARFVQD  
LLWQQRAELWRQLSAGAVVYLCGDGRQMAPAVRKTLMEDIAVAEGGLDGDAAAWFAGLVA  
EGRYRQDVFN

>BKK79\_11700|KEGG|CYP102E5|[Cupriavidus sp.]cuu|BP

MTQAATSSSSQAPVAGRPAASLQPIPRDPGWPLVGNILQIKPGAFAQHLMARARAHEGIFE  
LDFAGRRVPFVTSAALAAELADAARFRKFIGPPLSFLRDVAGDGLFTAHTDEANWGRAHR  
ILMPAFSQRAMKGYFDVMLRVAMRLVDKWDRQGPADIAVSDDMTRLTDLTIALSGFGYD  
FDSFASQQ LH PFIDAMVGALEEAMGKLTRFPLQDRFMHAAHRKFAEDTRFMRELVDDVIR

QRRQSPTPARDLLNLMLEARDPETDQRLDDVNIRNQVITFLIAGHETTSGLLTFALYELM  
RHPGVLAQAYAEVDAVLPGDAPPAYADLARLQVLDRVLKETLRLWPTAPAFSVAPFEDTV  
IGGRYRIHKDRRVAVVLTALHRDPAVWDDPERFDIDRFLPENEARIHPHAYKPFNGGERA  
CIGRQFALTEAKLALALMLRHFQLHDPHDYQFRIKETLTLKPDHFLLRARRRRPHERIVV  
AAPASGAVTAAARPVVAAGGETLAVLCASSLGTARELAEQVQAGALAAGYEATLHDLDD  
ALGKLPTQGLAVIVAATYNGRAPDNARRFEAMLDAAAGDAPGDWRAGGLRYAVLGCGNSQW  
ATYQAFPKRLDTFFAAAGARPLLARGEADGNADFDQAAEQWLAALWSALAQQQPHAPGPA  
PGAEGAPPLAVEVALRGIDEIRASVLPSTQPFQTVLANRELVS DPAGLWDFAVEPPRTST  
RDIRLRLPEGARYAAGDHLAVYPQNRPALVHDL CERLDDL DPEAVVTL SAPRAGAARGLPL  
GQPLPLRALLTHFVELQDVVSRQTLRLLAQRTCPFTTRQSLERLGSDDAAGYAAQVAAH  
RLGLPDLARFPAIELDLAGLLACVVPMPRPFYSIASSPLVSPDVATLTVGTVLAPALSG  
RGQFRGVASNWLQGLAPGATVAAAIRTPNPPFAPEADPAQAMILIGPGTGIAPFRGFLEE  
RAAQQAAGQAVAPVELYFGCRHPQHDWLYRDEMLAWQAQGVARLHVAHSATGAPARFVQD  
LLWQQRAELWRQLSAGAVAYLCGDGRQMAPAVRKTLM DIAVAEGGLDGD AASAWFAGLVA  
EGRYRQDVFN

>BKK79\_19265|KEGG|CYP212A18|[Cupriavidus sp.]cuu|BP

MPTRLPSSCPVHASAPSRPAS PAPQDAWPPGPAPGLTGWGLLRHMSRDLLGALAGWKQAH  
GDIVHLAIWPEHQVIVSDPELARELLVARHADLVRWERAMHVFSGLQGRSVLIVEGEAWH  
GKRTALQPAFAPRPVQSLVPTIVAACDKALAQWPTRAPAWPVESALTGLAMDIIMQTLFS  
SGIGDDARLAEHAVHAALVAADKEFYWPASWPDWMPWKRRKRNAVAALRALVERHLLARL  
RLPQDAWPDDLTLRLGLHRQDATAWPLQAVRDECMTAFLAGHETSAATLAWWAWCMAAN  
PAAQATARAEVERVLQGRAPGADTLPLGLTYLTQTVKETLRLYPTAPVLISRRSKRALTLG  
PWTFFPERTLFMLPVQLMHHDARWFDEPLAFRPERFAAGAPDFPRGAYLPFGAGPRVCLGQ  
HLAMAEELTVVAAMVLQRFSLSLPPDAEQLDTVLHITLRPAQPMRLGIAPAAATAPAAAAR  
PTVRG

>EHF44\_06115|KEGG|CYP102E1|[Cupriavidus pauculus]cpau|BP

MPPAMSSVPAPDALEPIPRDPGWPIVGNLFQITPGEVGQHLLARSRRHHQGIFELDFAGRR  
VPFVSSVALAAEVCDPARFRKIIIGPPLSYLRDMAGDGLFTAHSDEPNWGC AHRILMPAFS

GRAMKGYFDVMLRVANRLVDKWDRNGPDADIAVADDMTRLTLDLTIALAGFGYDFRSFASD  
APDPFIVAMVGALEEAMRKLTRLPIQDRFMGRAHRRFADDVATMRNLVDDVIRQRRATPR  
PGMDLLNLMLEARDPETDRQLDDANIRNQVITFLIAGHETTSGLLTFTLYELLRNPAVLA  
QAYAEVDAVLPGDAPPVHADLARMPLVDRVLKETLRLWPTAPAFAVAPFEDVVLGGRYRL  
RQNRRISSVLTALHRDPAVWDNPERFDIDRFLPEHEAKLPAHAYLPFGHGERACIGRQFA  
LTEAKLALALMLRNFAFHDPYDYQFRLKETLTIKPDNLVLRARRRRPHERIAAPAATPAV  
TDAAQADVRGHGQPMAVLCASSLTARELAEQIHGGAVAAGFDATLADLDDVADALPTSG  
LLVVVAATYNGHAPDSGRRFEAMLDAGGADGYRADGLRLALLGCGNSQWATYQAFPRRVF  
DVFTQAGAVPLLPRGEADGNGDFDQAAERWLAALWQALQADGAGAGGIGVDVDVRSVAAI  
RADTLPAGTRTFTVLANEELVGDPAGLWDFAVEPPRTSTRAIRLQLPPGMTYETGDHVAV  
WPRNADALVDDL CARLDLDADAMVTLSAPHGTGRGLPIGQPLPLRQLLTHFVELQDVVSR  
QTLRALAQATRCPATRAALERLASDDEADGYATQVAARRNLCDVLAHPAVTPTLPQLL  
ACTVPMRPRFYSSIASSPRVSPDVATLLVGT VWAPALSGRGQFRGVASTWLQGLAPGATVS  
ASIRTPNPPFAPLADPSAPMLLVGPGTGIAPFRGFLEERAAEQAGQRVTPVQLYFGCRH  
PRHDWLFHDEIARWAAAGVAEVHTAYSVVPGAARYVQDLLWQRRAQVWTQLQAGATVYVC  
GDGRRMAPAVRQTLIDIGADQGMAPEGASDWFAALVRQGGRYRQDVFN

>EHF44\_13900|KEGG|CYP105CW2|[Cupriavidus pauculus]cpau|BP

MTESPAPTPSSNPSSAVEGRCPFDAANEPKSACPFHAEGDSGGIPDFPPKRVDPLAPPP  
VFFQMQQKGELAQQGKLWDGKIAWLVTTRYDDVRAVLSDSRFSSDVSHPGFPSSSAVKVVR  
SSNRTFITMDEPKHSEQRRMLTSEFTIRKIEENLRPLQAIVDKLLED FAMGPQPSDLVSA  
FTLATPALAISELLGV PYDDHDFEQEQAMIMTSSTATREEASAANQALCEYLRELVAKRS  
ESPGEDILSRLIVNHVRKGDITETDVVSLGRLLLLIAGHETTANTTSMGVLFLLQRPDIWE  
ELRQNPSLVPNAVEEMLRFLDVIQSGTRRVALEDVVVNGQLIRAGDPVVVLSISANRDQE  
QFKDPHVFDLRRDARTQIAFGYGPHQCMGQV LARVEMQIMFTALLKRLPNLRLAVPIESL  
AFKSDSLMYGVRALPVSW

>EHF44\_13985|KEGG|CYP105CW1|[Cupriavidus pauculus]cpau|BP

MHAGGDSGIPDFPPERVDPLSPPPVYFQMQQGSGLGQARLWDGKIAWLITRYDDVRSVLS  
DPRFSSDITNPGYPTVSAAMKVARGSNRTFITMDAPKHAEHRRMLTGEFSIRKIEALRPR

IQAIVDKLLDDFATKPQPSDLVSAFTLATPALAISELLGVPYEDHDFQELAMVLTSSSA  
TLEEAI AANHELCEVYLKGLVAKRSENPGE DILSR LIVNHVRKGDITETDVVSLARLLLI  
AGHETTANTTAMGVLFL LQRPDIWNELRQDTS LVPNAVEEILRYLDVTHSGKRRVATEDI  
VVNGQMIQAGDPVVVLSVSANRDSSKFEDPNVFDLRDRSRTQVSFGYGPHQCIGQPLARL  
EMQIMFTALLERFPNLELAVPVESLEFKGDSL MYGVKELPVRW

>EHF44\_20660|KEGG|CYP229F18|[Cupriavidus pauculus]cpau|BP

MQPADPVA AVTHPD PYPYRALARTRPFHFDQGLKLWVAAGAEVA AVLAHPDARVRPPG  
QPVP PALAGGPAGDLFGRLVRMNDGPAHAALKPAILRGLAGLDLGLVRVRAHALAAALPR  
LGTDDAHEAMQWMFTLPVLT VADLLGLPLARDADGHVLTTRIAGFVTTFAAAMSPLASPAD  
VAAGAAAAQWLTRCVADQADHADPAPPDGLLPTLWRDAAHVEPAARVANAVGLMIQACEA  
TAGLIGNTLVHLGRDAAGRPVEDFDAIDATVGRVADLDPPVQNTRRFLAADAVVCGQPLR  
AGDAVLVLLAAAAHDPSAPSGGRPWTFGAGRHGCPGDALARVLA ACTVQALLARGVQPAR  
LAAGVRYRPSVNARIPQFTSQP

>EHF44\_24585|KEGG|CYP116B300|[Cupriavidus pauculus]cpau|BP

MTQPTPPAPRAGCPIDHTALRAPNGCPVSHNAAAFDPFEDGYQQDPPDYVRWSREQEPVF  
YSPRLGYWVTRYDDIKAI FRDNLTFSPAIALEKITPTGDAANAVLASYG YAMNRTL VNE  
DEPAHMPRRRALMEPFTPAELMHHEPLVRRLAREYVDRFIDDGRADLVDQMLWEVPLTVA  
LHFLGVPEEDMDLLRQYSIAHTVNTWGRPRPEEQVAVAHAVGNFWQLAGRILDKMRADPS  
GPGWMQYGIRKQQELPDVVTDSYLHSM MMAGIVAAHETTANASANA I KLLLQHPDVWREI  
CDDPALIPNAVEECLRHNGSVAAWRRVVTQDTEVGGIPLAAGSKLLIMTASANHDERHFA  
DADLFDIHRDNASDQLTFGYGAHQCMGKNLARMEMQVFLEELTSRLPHRLAEQTFTYVP  
NTSFRGPEHLWVEWDPARNPERTNPAVLAPRDAVRIGEPTGNIGRTL VVASVTPAAQDVL  
RIRLVAPDGRPLPRWSPGSHIDVECGSTGISRQYSLCGDPADAGAFEIAVLREAESRGS  
AWIHASLRAGNRLKVRGPRNHFR LDEGCRRALFIAGGIGITPVSAMARRARELGIDYAIH  
YCGRSRAAMAMLDELAALHGSRLHIHARDEGSRADLAAIVGAPDGITQVYACGPARMIEG  
LEAACAAWPPDTLRVEHFSSQLGTL DPSKEQPFTVELKD SGLTLEVPADQTL LTALRCAN  
IDVQSDCEEGLCGSCEVRVL AGDIDHRDVVLTRTEREANDRMMSCCSRAKTGGRIVLAL

>EHF44\_26030|KEGG|CYP133C12|[Cupriavidus pauculus]cpau|BP

MKFESFATPAFFENPYPLYEQIRAAGPLLPLGPNVWVTGRFHVIDALLRDRRMGKTYLQS  
VQARYGEAATQAPVFQAI SRTFLMINPPAHTRLRALLMQAFNRRQVEGLARIVDTTTRSL  
LDRVGHRTFEFDVVADFALPLPVEIICRLLDIPVEDGVRLGSAASRMATALDLAPLDERQL  
ADANDAALTLEAYFRDVVARRRTQPGDDLISSLIGVEQDGATLTEAEIISNVILLFVAGH  
ETTSNMIGNTLIGLFRAPEALQQLKAGLSDPAMVSRAVAECLRHGAVQM VVRTAFEDIA  
LDDVVVPRGSIVFMLLGAANRDP AVFPQPDQLDL SRADAPSLSFGGGIHYCLGARLATLE  
LESAITGLLTRFPNLQPVDLAGLSWHRNRLRGVQALPVRTGA

>E0W60\_00125|KEGG|CYP1098D1|[Cupriavidus oxalaticus]cox|BP

MNFQPPYPKPHTRKSSFLRLRGWNSWIDVLFERSYSMKMGKISQPGMDIFMVNDADWV  
RKILGDTHEYPKHKLMHRMLEPLLGT SIFTTNGKVWERQRR LVEPAFAQARLKL VFSLMA  
DSVAGMTRRLDAVADGRSYEVDGEMTYVTADIIFRTILSENLEESA AKEIYDAFLEFQHH  
AQRAMILMIYRLPPVISAWRSKRAAKKIRVILSEIIARRLAERDSGQGS AKQDILAGMMD  
AVDPVNGDRFTYEELVDQVCMLFLAGHETSASALTWALYLISQCPHLQDKMLAEIQEAVG  
DRDFELSDIKSLPAVG NVFRETLRLYPPVGFFVREAAQSQCIRDKSVKEGSPILISPWLL  
HRHRTLWERPDEFDPDRFDTQAGKESSK CAYIPFSKGP RVCIGAAYATQEAVLILASIVR  
RYRVEADPGHVPKVVG RVTIRSGNGVRVRLHRR

>E0W60\_00515|KEGG|CYP116B161|[Cupriavidus oxalaticus]cox|BP

MAIPSPDTARGGCPVDHSAFTAPNGCPVSHKAAEFDPFGDGYQQDPPEYVRWSREQEPVF  
YSPKLG YWVTRYDDIKAI FRDNITFSPSIALEKITPTGDEANAVLASYG YAMNRTL VNE  
DEPAHMPRRRALMDPFTPAELAHHEPMVRR LAREYVDQFIDDGRADLVDQMLWEVPLAVA  
LHFLGVPEEDMDLLRQYSIAHTVNTWGRPRPDEQVAVAHAVGNFWQLAGRILDKMREDPS  
GPGWMQYGLRKQKALPEVVTDSYLHSM MMAGIVA AHETTANASANA I KLLQHPDTWREI  
CEDPSLIPNAVEECLRHNGSVAAWRR LVT RDTEVGGISLATGSKLLIVTSSANHDERHFA  
DADLFDIRRD NASEQLTFGYGSHQCMGKNLARMEMQIFLEELTRRLPHMRLAEQSFTYVP  
NTSFRGPEHLLVEWDPAQNPERRDPALLAQRQPV RIGEPSAHTSARTV VVESIAPAAAGV  
VRLRLAAPDGKPLPRWAPGSHIDVECGDTGLSRQYSLCGDPDDAAALEIAVLREPDSRGG  
SAWVHGSVTAGDRLRIRGPRNHFRFDEGCARAI F IAGGIGITPV SAMARRARQLGIDYEI  
HYCGRSRGSMAMLDALQALHGARLHVYAGDEGRRADFAAMLATPQPRTHVYACGPQRLLD

ALADACAAWPEDALRVEHFVSRLGTLDSKEQPFTVELKDSSGLVMEVPAGQTLLAALRGA  
NIDVQSDCEEGLCGSCEVRVLQVDRDVLTRTERDANDRMMACCSRAAGGCRLVLEL

>E0W60\_05550|KEGG|CYP229F19|[Cupriavidus oxalaticus]cox|BP

MLPAAESHANDANHALDPLSAVTHPDYPYRELATHRPFFRDQRLGLWVAAGAREVATV  
LSHPDCRVRPPAQPVPPALAGTAAGDLFGRLIRMNDGAAHAPLKDLLMPLLAIDPAAAA  
RRAAALAEELMDAGTAWSAERINGVLSTLPVVTLADLLGLPVAVDRATAAAVAAHVAAFAA  
AQSPADANAVQAGAVAAQWLGNWLANAVPAAGPLPSLQQAACAAGIDAQAVAANTIGLL  
VQACEATAALAGNSLLHLGRGKALPGISPDQLVTEVAVSDPPVQNTRRFLAADATLCGHD  
VKAGDVVLVLLAAASCGGMADGERPWTFGHGRHACPGDRLAQALAGATVTALLARGAAPA  
VLARAFRYRPSLNARIPHFC

>E0W60\_09205|KEGG|CYP102E6|[Cupriavidus oxalaticus]cox|BP

MPQPTVSPGTEALAQPAHPAAPTAEPIPRDPGWPLVGNLLQIKPGTVGQHLLARSRHHD  
GIFELDFAGRCVPFVTSVALAAEVCDAAFRKYIGPPLSYLRGMAGDGLFTAHTDEANWG  
KAHRILMPAFSQRAMKGYFEVMLRVANRLVDKWDQRQGPADIAVADDMTRLTLDTIALSG  
FGYDFDSFASAQLHPFIEAMVGALGEAMSRLTRLGLQDRFMHAAHRKFDEDTFRMRELVD  
DVIRRRRAADEGGRQGTAMDLLGLMLEARDPDTDQRLDDENIRNQVITFLIAGHETTSGL  
LTFALYELLRNPGVMAQAYAEVDAVLPGDAAPVYADLARLPVLDRLVLRWPTAPAF  
AVAPYADTLLGGRYLIRKDRRVSVLTALHRDPRVWADPERFDIDRFLPDNEARLPRHAY  
MPFGNGERACIGRQFALTEAKLALALMLRNQFQTDADHYQFRIKETLTIKPDGFTVRARR  
RRPHERIVGMPVAGAEQAPPAGAEVRGAGRALAVLCGSSSLGTARELAEQVHAGALAAGFD  
ATLRDLDEIADALPASGLAVIVAATYNGRAPDSARRFEDLLNSGAARDYRAPDLRVAVLG  
CGNSQWPTYQAFPRRVFEFFASAGATPLLPRGEADGNGDFDQAAERWLALLWQALQGGDA  
ASALPQVPVAVQVQLRGVAEIRATTLPNAQGFTVLSNTELVNDPDGLWDFAREAPRTSTR  
DIRLRLPEGVRYHTGDHLAVYPQNQPETVTAICERIDVDPDAIVTLSAAPGAARGLPVGE  
ALSARQLLTHFVELQDVVSRQTLRSLAQATPCPFTRQSLQQLASDDEAGYAAQLVQRRL  
GLGDILDRFPAIGLDLAGLLACTVPMRPRFYSIASSPLVSPDVATITVGTVCAPALSGRG

LFRGVASTWLQGLAPGAVVAGVIRTPHPPFAPEAPDVPMILVGPGTGIAPFRGFLEERAA  
QQAAGEAVRPVQLYYGCRHPAHDWLYRDDVARWQEQQVAEVHAAYSVVDGAPCFVQDLLW  
QRQADVWAQLNAGAVFYVCGDGRHMAPAVRQTLIRIAAEQGGMTEAAASDWLAALVAAGR  
YRQDVFN

>BMAA0023|KEGG|CYP1488A1|[Burkholderia mallei]bma|BP

MNGLPLSLPRVDSTDSLAFADPLAFLARARAQCGDVFVLREHGPIFSRASDCSGVIAVFGE  
HRLRQVLTETDTFALPMSAAKMALPKNLVNLNRGLHSMREPEHGRHKRLLTGTANRALF  
DAHRSGMQTDLSRFCEMLNGDGRISVVSRMRELTAKLASRLFLGPQCEEDAEFLTLLSAY  
FTLRREASSPNAHDPLQYRDALIGAGRQLDRALRARIRRYRKAPAGECAGLLQRLATAGQ  
PGSPALSEDEIVGHANVMFVSSTEPVAISLAWLLLVLSQLPDLRRALRAESAARASSPAS  
PYDAPLLERVINETLRLLTNPALMVRATTQAVSLQGVALPARCEIVVCPFLVHREANAF  
RPHAFLPSRWETARPSPYEYFPFGAGGHFCAGRNLALESLIGEVLTLLSRFDFVLDIEQF  
IDWRIHIMLMPKGDPTLTATHPVDERDTPSPKWRGPVAELFHFAPGLS

>BMAA1669|KEGG|CYP116B23|[Burkholderia mallei]bma|BP

MTTHSASTPPALPAAQCPFRPVSDDAAHAPAGCPASAGAAAFDPFDDAYQQDPPEYVRWA  
REREPVFYSPKLGWVARYDDIKTIFRDNRTFSPSIALEKITPTGPDANAALASYGYAM  
GRTLVDNEDEPTHMARRRLLEPFTPDALRAHEPMVRRLAREYVDRFVDDGRADLVDQMLW  
EVPLTVALHFLGVPEADMDTLRAYSIAHTVNTWGRPRPDEQVAVAHAVGQFWQYAGKVLE  
QMREDPSGPGWMQFGIRMQREHPDIVTDSYLHSMMMAGIVAAHETTANATANALKLLEH  
PRAWRELCDPALIPNAVDECLRHSGSIVAWRRIATRDTVGGVAIPAGAKLLIVTSSAN  
RDERRFADPDLFDIHRDNPADHLTFGYGSHQCMGKHLARMEMQIFIDELSRRLPHMRLAE  
QRFTYVPNTSFRGPEHLWVEWEPAENPQRRGHGARRCALAVRIGESNARRAGRALRVDSV  
MPVAERVLRLVRLVAPDGAPLPRWSAGAHIDVECGDTGLSRQYSLCGDPAERGVEIAVLR  
EPASRGGSAAWMHERLRPGMRVKIRGPRNHFRDLGHAARAILIAGGIGITPIGAIAREARA  
RGIDYALHYCGRSRRTMAFVDELAALHGERLRLHVSDEGTRHDFSALDVAAGTQVYACGP  
ARMLDALAACAAHWPAAHALRVEHFAAAAPRVDPRTDQPFLEVELKDSGLTLTPANRTLLA  
TLRAANVDVQSDCEEGLCGSCEVRVLAGEVDHRDSVLSADERALNTRMMACCSRARHGRL  
VLEL

>BMAA2088|KEGG|CYP1013A3|[Burkholderia mallei]bma|BP

MSKHRQAPGPRGGLVMGNLAAYKRNPITMLRLHQQYGDVARNRLGPFVTHALAHDPDHIQ  
YVLQENHRNYVRGRFYDNFKMFFGDGLLTDDGEFWRRHRRVVQPLFHKKQVDAHTAAVGD  
AALALAYRWSALPPGKALDVVEEMMHLSLRMLGLMVFNNTDVSSHAEAAGPAVRFGIEAMM  
PQGNLNDFI PRWAPTRFNRRIAHARRAIDTIVAKIIADHREARCEPSDVISLLLNARDPD  
TGAPMTQQEVHDEVMTVFLAGHETTGAGLAWALYALAQHPAVLRQLRDELDARLGGRAPT  
VQDFEQLPYLSQVVDEVLRVYPPIWGFTRDLDVEDDEIGGYRIPARSSVFMSPYVTHRHPA  
FWRNPDAFDPENFASDAPARHRFVYFPFGGGMKRCIGFQTALLQMRVLVAVVAQHFDLNA  
LPGHPIELGATISLRPVHGIRLIVKPRERQQSHLARVREHESARALRPLGDTATTAGAAC  
PMTAAREPGASAAALA AVEAGALDAHRGGAAAAAAGEPCPPRDPAEAAPLPLAAAPAPA  
SPAVDADASARGVPAWRFTWRPVPVDPVPDEPSPALSGRRIALVNNGRGGTAERVA AALAR  
TCAKVSVFAPAASADHAEAARV FVNEAGPLDGI VDLGLEAPFALDDAGAW EAPMRRTVEL  
LKACYGDWAAEDDTSRLFYVALTWMDGQMGYGETAGAQPLGGLWAGLAKTLPQELPNCNV  
RVLDIAPDETGRVDRLVVNELYRWGLFEVGYRGGVRYTLHAKRNELPPHAVDARTTLGAG  
DTVLFSGGARGIGLLCARSLAERHGCTVIVTGRET PPDGGEPMALDEPGFKHYGLEQLR  
AATPEHPPKAI RAALQRLKRRRELRTALDEMAALGLPVHYRVCDVTDRAAVRALCDELGD  
SLRMVIHNAGVDRPVRLIQKRAEDFADTVRTKVLGFANLCDAVRARPRLVQFCNVGSLTG  
RWGGMTGETDYAAANEALARLGLWAARHAFSPACGVKTLVWPTWEGVGMITNFAVTQRYV  
SPMNVDEGVRHWLRELAAPGSGEVMFMGAVGRAPTPMQIKGFVPIRELPNIGELVTRRHH  
VGEPVRFRPFKR FESRYAIDPAVAPYAHAFR FNGRAVL PASLVLEHACAVGDWVMPPTGE  
PRELSEMTNVVLRLDALPDVPAGGAPVELASEAAGYMIGDVWCVDVRCSDARTQAELLSM  
TLVYRPQPEQIGAAFARAPDTTPEPAPLTSAPHAAWN GELLPAGDWSVPDDASAGIVRIG  
RVPSAAVLSLWALPFPLELRLPVNHVEHVLRVLLAEWGAARADAPAVWRIGGAKLARLPA  
ASADGVVEYAAGRFAVL DARGYVLLRIDDARVDGEPAQAALPETGALADPLTA

>BMAAVP1\_1115|KEGG|CYP1013A3|[Burkholderia mallei]bmv|BP

MSKHRQAPGPRGGLVMGNLAAYKRNPITMLRLHQQYGDVARNRLGPFVTHALAHDPDHIQ  
YVLQENHRNYVRGRFYDNFKMFFGDGLLTDDGEFWRRHRRVVQPLFHKKQVDAHTAAVGD  
AALALAYRWSALPPGKALDVVEEMMHLSLRMLGLMVFNNTDVSSHAEAAGPAVRFGIEAMM  
PQGNLNDFI PRWAPTRFNRRIAHARRAIDTIVAKIIADHREARCEPSDVISLLLNARDPD



TGAPMTQQEVHDEVMTVFLAGHETTGAGLAWALYALAQHPAVLRQLRDELDARLGGRAPT  
VQDFEQLPYLSQVVDEVLRVYPPIWGFTDRDLVEDDEIGGYRIPARSSVFMSPYVTHRHPA  
FWRNPDAFDPENFASDAPARHRFVYFPFGGGMKRCIGFQTALLQMRVLVAVVAQHFDLNA  
LPGHPIELGATISLRPVHGIRLIVKPRERQQSHLARVREHESARALRPLGDTATTAGAAC  
PMTAAREPGASAAALA AVEAGALDAHRGGAAAAAAGEPCPPRDPAEAAPLPLAAAPAPA  
SPAVDADASARGVPAWRFTWRPVVPDVPDEPSPALSGRRIALVNGRGGTAERVA AALAR  
TCAKVSVFAPAASADHAEAARVVFVNEAGPLDGIVDLGLEAPFALDDAGAW EAPMRRTVEL  
LKACYGDWAAEDDTSRLFYVALTWMDGQMGYGETAGAQPLGGLWAGLAKTLPQELPNCNV  
RVLDIAPDETGRVDRLVVNELYRWGLFEVGYRGGVRYTLHAKRNELPPHAVDARTTLGAG  
DTVLFSGGARGIGLLCARSLAERHGCTVIVTGRETTPDGGEPMALDEPGFKHYGLEQLR  
AATPEHPPKAI RAALQRLKRRRELRTALDEMAALGLPVHYRVCDVTDRAAVRALCDELGD  
SLRMVIHNAGVDRPVRLIQKRAEDFADTVRTKVLGFANLCDAVRARPRLVQFCNVGSLTG  
RWGGMTGETDYAAANEALARLGLWAARHAFSPACGVKTLVWPTWEGVGMITNFAVTQRYV  
SPMNVDEGVRHWLRELAAPGSGEVMFMGAVGRAPTPMQIKGFVPIRELPNIGELVTRRHH  
VGEPVRFRFPKRFESRYAIDPAVAPYAHAFRFNGRAVL PASLVLEHACAVGDWVMPPTGE  
PRELSEMTNVVLRLDALPDVPAGGAPVELASEAAGYMIGDVWCVDVRCSDARTQAELLSM  
TLVYRPQPEQIGAAFARAPDTTPEPAPLTSAPHAAWN GELLPAGDWSVPDDASAGIVRIG  
RVPSAAVLSLWALPFPLELRLPVNHVEHVLRVLLAEWGAA RADAPAVWRIGGAKLARLPA  
ASADGVVEYAAGRFAVL DARGYVLLRIDDARVDGEPAQAALSETGALADPLTA

>BMASAVP1\_1176|KEGG|CYP1488A1|[Burkholderia mallei]bmv|BP

MNGLPLSLPRVDSTDSL FADPLAFLARARAQCGDV FVLREHGPIFSRASDCSGVIAVFGE  
HRLRQVLTETDTFALPMSAAAKMALPKNLVNLNRGLHSMREPEHGRHKRLLTGTANRALF  
DAHRSGMQTDLSRFCEMLNGDGRISVVS RMRELTAKLASRLFLGPQCEEDAE LTFLLSAY  
FTLRREASSPNAHDPLQYRDALIGAGRQLDRALRARIRRYRKAPAGECAGLLQRLATAGQ  
PGSPALSEDEIVGHANVMFVSSTEPVAISLAWLLLVLSQLPDLRRALRAESAARASSPAS  
PYDAPLLERVINETLRL LTPNALMVRATTQAVSLQGVALPARCEIVVCPFLVHREANAFA  
RPHAFLPSRWETARPSPYEYFPFGAGGHFCAGRNLA LSLIGEV LSTLLSRFDFVLDIEQF  
IDWRIHIMLMPKGDPTLT AHPVDERRDTPSPKWRGPVAELFHFAPGLS

>BMASAVP1\_1707|KEGG|CYP116B23|[Burkholderia mallei]bmv|BP

MTTHSASTPPALPAAQCPFRPVSDDAAAHPAGCPASAGAAAFDPFDDAYQQDPPEYVRWA  
REREPVFYSPKLGYWVVARYDDIKTI FRDNRTFSPSIALEKITPTGPDANAALASYGYAM  
GRTL VNEDEPTHMARRRL LIEPFTP DALRAHEPMVRR LAREYVDRFVDDGRADLVDQMLW  
EVPLTVALHFLGVPEADMDTL RAYSIAHTVNTWGRPRPDEQVAVAHAVGQFWQYAGKVLE  
QMREDPSGPGWMQFGIRMQREHPDIVTDSYLHSM MMAGIVAAHETTANATANALKL LLEH  
PRAWRELCDDPALIPNAVDECLRHSGSIVAWRRIATR DATVGGVAIPAGAKLLIVTSSAN  
RDERRFADPDLFDIHRDNPADHLTFGYGSHQCMGKHLARMEMQIFIDELSRRLPHMRLAE  
QRFTYVPNTSFRGPEHLWVEWEPAENPQRRGHGARRCALAVRIGESNARRAGRALRVDSV  
MPVAERVLRLVRLVAPDGAPLPRWSAGAHIDVECGDTGLSRQYSLCGDPAERGVYEIAVLR  
EPASRGGSAWMHRLRPGMRVKIRGPRNHFRLDGHAARAILIAGGIGITPIGAIAREARA  
RGIDYALHYCGRSRRTMAFVDELAALHGERLRLHVSDEGTRHDFSALDVAAGTQVYACGP  
ARMLDALAACAAHWPAAHALRVEHF AAAAPRVDPRTDQPFLEVELKDSGLTLTVPANRTLLA  
TLRAANVDVQSDCEEGLCGSCEVRVLAGEVDHRDSVLSADERALNTRMMACCSRARHGRL  
VLEL

>BMA10229\_1393|KEGG|CYP1013A3|[Burkholderia mallei]bml|BP

MSKHRQAPGPRGGLVMGNLAAYKRNPITM LLRLHQQYGDVARNRLGPFVTHALAHDPDHIQ  
YVLQENHRNYVRGRFYDNFKMFFGDGLLT DGEFWRRHRRVVQPLFHKKQVDAHTAAVGD  
AALALAYRWSALPPGKALDVVEEMHLSLRMLGLMVFN TDVSSHAEAAAGPAVRFGIEAMM  
PQGNLNDFI PRWAPTRFNRRIAHARRAIDTIVAKI IADHREARCEPSDVISL LLNARDPD  
TGAPMTQQEVHDEVMTVFLAGHETT GAGLAWALYALAQH PAVLRQLRDELDARLGGRAPT  
VQDFEQLPYLSQVVDEVLRVYPPIWGFTRDLVEDDE IGGYRIPARSSVFMSPYVTHRHPA  
FWRNPDAFDPENFASDAPARHRFVYFPFGGGM RKCIGFQTALLQMRVLVAVVAQHFDLNA  
LPGHPIELGATISLRPVHGIRLIVKPRERQQSHLARVREHESARALRPLGDTATTAGAAC  
PMTAAREPGASAAALAAVEAGALDAHRGGAAAAAAGEPCPPRDPAEAAPLPLAAAPAPA  
SPAVDADASARGVPAWRFTWRPVPVDPVPDEP SPALSGRRIALVNGRGGTAERVAAALAR

TCAKVSVFAPAASADHAEAAARVVFVNEAGPLDGIVDLGLLEAPFALDDAGAWAEPMRRTVEL  
LKACYGDWAAEDDTSRLFYVALTWMDGQMGYGETAGAQLGGLWAGLAKTLPQELPNCNV  
RVLDIAPDETGRVDRLVVNELYRWGLFEVGYRGGVRYTLHAKRNELPPHAVDARTTLGAG  
DTVLFSGGARGIGLLCARSLAERHGCTVIVTGRETTPDGGEPWMALDEPGFKHYGLEQLR  
AATPEHPPKAIRAAALQRLKRRRELRTALDEMAALGLPVHYRVCDVTDRAAVRALCDELGD  
SLRMVIHNAAGVDRPVRLIQKRAEDFADTVRTKVLGFANLCDAVRARPRLVQFCNVGSLTG  
RWGGMTGETDYAAANEALARLGLWAARHAFSPACGVKTLVWPTWEGVGMITNFAVTQRYV  
SPMNVDEGVRHWLRELAAPGSGEVMFMGAVGRAPTPMQIKGFVPIRELPNIGELVTRRH  
VGEPVRFRPFKRFESRYAIDPAVAPYAHAFRFRNGRAVLPAASLVLEHACAVGDWVMPPTGE  
PRELSEMTNVVLRLDALPDVPAGGAPVELASEAAGYMIGDVWCVDVRCSDARTQAELLSM  
TLVYRPQPEQIGAAFARAPDTTPEPAPLTSAPHAAWNCELLPAGDWSVPDDASAGIVRIG  
RVPSAAVLSLWALPFPLELRLPVNHVEHVLRVLLAEWGAARADAPAVWRIGGAKLARLPA  
ASADGVVEYAAGRFAVLDAARGYVLLRIDDARVDGEPAQAALPETGALADPLTA

>BMA10229\_1455|KEGG|CYP1488A1|[Burkholderia mallei]bml|BP

MLREHGPIFSRASDCSGVIAVFGEHRLRQVLTETDTFALPMSAAKMALPKNLVNLRGL  
HSMREPEHGRHKRLLTGTANRALFDAHRSGMQTDLRSRCEMLNGDGRISSVSRMRELTAK  
LASRLFLGPQCEEDAELTFLLSAYFTLRREASSPNAHDPLQYRDALIGAGRQLDRALRAR  
IRRYRKAPAGECAGLLQRLATAGQPGSPALSEDEIVGHANVMFVSSTEPVAISLAWLLLV  
LSQLPDLRRALRAESAARASSPASPYDAPLLERVINETLRLLTPNALMVRATTQAVSLQG  
VALPARCEIVVCPFLVHREANAFARPHAFLPSRWETARPSPYEYFPFGAGGHFCAGRNL  
LSLIGEVLTLLSRFDFVLDIEQFIDWRIHIMLMPKGDPTLTAHPVDERDTPSPKWRGP  
VAELFHFAPGLS

>BMA10229\_1913|KEGG|CYP116B23|[Burkholderia mallei]bml|BP

MTTHSASTPPALPAAQCPFRPVSDDAAHAPAGCPASAGAAAFDPFDDAYQQDPPEYVRWA  
REREPVFYSPKLGWVVARYDDIKTIFRDNRTFSPSIALEKITPTGPDANAALASYGYAM  
GRTLVDNEDEPTHMARRRLLEPFTPDALRAHEPMVRRRLAREYVDRFVDDGRADLVDQMLW  
EVPLTVALHFLGVPEADMDTLRAYSIAHTVNTWGRPRPDEQVAVAHAVGQFWQYAGKVLE  
QMREDPSGPGWMQFGIRMQREHPDIVTDSYLHSMMAAGIVAAHETTANATANALKLLLEH

PRAWRELCDDPALIPNAVDECLRHSGSIVAWRRIATRDATVGGVAIPAGAKLLIVTSSAN  
RDERRFADPDLFDIHRDNPADHLTFGYGSHQCMGKHLARMEMQIFIDELSRRLPHMRLAE  
QRFTYVPNTSFRGPEHLWVEWEPAENPQRRGHGARRCALAVRIGESNARRAGRALRVDSV  
MPVAERVLRLVAPDGAPLPRWSAGAHIDVECGDTGLSRQYSLCGDPAERGVYEIAVLR  
EPASRGGSAAWMHERLRPGMRVKIRGPRNHFRLDGHAARAILIAGGIGITPIGAIAREARA  
RGIDYALHYCGRSRRTMAFVDELAALHGERLRLHVSDEGTRHDFSALDVAAGTQVYACGP  
ARMLDALAACAAHWPAAHALRVEHFAAAAAPRVDPRTDQPFLEVELKDSGLTLTVPANRTLLA  
TLRAANVDVQSDCEEGLCGSCEVRVLAGEVDHRDSVLSADERALNTRMMACCSRARHGRL  
VLEL

>BMA10247\_A0029|KEGG|CYP1488A1|[Burkholderia mallei]bmn|BP

MNGLPLSLPRVDSTDSL FADPLAFLARARAQCGDV FVLREHGPIFSRASDCSGVIAVFGE  
HRLRQVLTETDTFALPMSAAKMALPKNLVNLNRGLHSMREPEHGRHKRLLTGTANRALF  
DAHRSGMQTDLSRFCEMLNGDGRISVVS RMRELTAKLASRLFLGPQCEEDAELTFLLSAY  
FTLRREASSPNAHDPLQYRDALIGAGRQLDRALRARIRRYRKAPAGECAGLLQRLATAGQ  
PGSPALSEDEIVGHANVMFVSSTEPVAISLAWLLLVLSQLPDLRRALRAESAARASSPAS  
PYDAPLLERVINETLRLLLTPNALMVRATTQAVSLQGVALPARCEIVVCPFLVHREANAF  
RPHAFLPSRWETARPSPEYFFPGAGGHFCAGRNLALSLIGEV LSTLLSRFDFVLDIEQF  
IDWRIHIMLMPKGDPTLT AHPVDERRDTPSPKWRGPVAELFHFAPGLS

>BMA10247\_A0588|KEGG|CYP116B23|[Burkholderia mallei]bmn|BP

MTTHSASTPPALPAAQC PFRPVSDDAAAH PAGCPASAGAAAFDPFDDAYQQDPPEYVRWA  
REREPVFYSPKLG YWV VARYDDIKTI FRDNRTFSPSIALEKITPTGPDANAALASYGYAM  
GRTL VNEDEPT HMARRRL LIEPFTPDALRAHEPMVRRLAREYVDRFVDDGRADLVDQMLW  
EVPLTVALHFLGVPEADMDTL RAYSIAHTVNTWGRPRPDEQVAVAHAVGQFWQYAGK VLE  
QMREDPSGPGWMQFGIRMQREHPDIVTDSYLHSM MMAGIVA AHETTANATANALKLLLEH  
PRAWRELCDDPALIPNAVDECLRHSGSIVAWRRIATRDATVGGVAIPAGAKLLIVTSSAN  
RDERRFADPDLFDIHRDNPADHLTFGYGSHQCMGKHLARMEMQIFIDELSRRLPHMRLAE  
QRFTYVPNTSFRGPEHLWVEWEPAENPQRRGHGARRCALAVRIGESNARRAGRALRVDSV  
MPVAERVLRLVAPDGAPLPRWSAGAHIDVECGDTGLSRQYSLCGDPAERGVYEIAVLR  
EPASRGGSAAWMHERLRPGMRVKIRGPRNHFRLDGHAARAILIAGGIGITPIGAIAREARA

RGIDYALHYCGRSRRTMAFVDELAALHGERLRLHVSDEGTRHDFSALDVAAGTQVYACGP  
ARMLDALAACAAHWPAAHALRVEHFAAAAAPRVDPRTDQPFLEVELKDSGLTLTPANRTLLA  
TLRAANVDVQSDCEEGLCGSCEVRVLAGEVDHRDSVLSADERALNTRMMACCSRARHGRL  
VLEL

>BMA10247\_A2379|KEGG|CYP1013A3|[Burkholderia mallei]bmn|BP  
MSKHRQAPGPRGGLVMGNLAAYKRNPITMLLRLHQQYGDVARNRLGPFVTHALAHDPDHIQ  
YVLQENHRNYVRGRFYDNFKMFFGDGLLTDDGEFWRRHRRVVQPLFHKKQVDAHTAAVGD  
AALALAYRWSALPPGKALDVVEEMMHLSLRMLGLMVFNNTDVSSHAEAAGPAVRFGIEAMM  
PQGNLNDFI PRWAPTRFNRRIAHARRAIDTIVAKIIADHREARCEPSDVISLLLNARDPD  
TGAPMTQQEVHDEVMTVFLAGHETTGAGLAWALYALAQHPAVLRQLRDELDARLGGRAPT  
VQDFEQLPYLSQVVDEVLRVYPPIWGFTRDLVEDDEIGGYRIPARSSVFMSPYVTHRHPA  
FWRNPDAFDPENFASDAPARHRFVYFPFGGGMKRCIGFQTALLQMRVLVAVVAQHFDLNA  
LPGHPIELGATISLRPVHGIRLIVKPRERQQSHLARVREHESARALRPLGDTATTAGAAC  
PMTAAREPGASAAALA AVEAGALDAAHRGGAAAAAAGEPCPPRPAAEAAPLPLAAAPAPA  
SPAVDADASARGVPAWRFTWRPVPVDPVPDEPSPALSGRRIALVNGRGGTAERVA AALAR  
TCAKVSVFAPAASADHAEAARVFN EAGPLDGI VDLGLEAPFALDDAGAW EAPMRRTVEL  
LKACYGDWAAEDDTSRLFYVALTWMDGQMGYGETAGAQPLGGLWAGLAKTLPQELPNCNV  
RVLDIAPDETGRVDRLVVNELYRWGLFEVGYRGGVRYTLHAKRNELPPHAVDARTTLGAG  
DTVLFSGGARGIGLLCARSLAERHGCTVIVTGRET PPDGGEPWMALDEPGFKHYGLEQLR  
AATPEHPPKAIRAAALQRLKRRRELRTALDEMAALGLPVHYRVCDVTDRAAVRALCDELGD  
SLRMVIHNAGVDRPVRLIQKRAEDFADTVRTKVLGFANLCDAVRARPRLVQFCNVGSLTG  
RWGGMTGETDYAAANEALARLGLWAARHAFSPACGVKTLVWPTWEGVGMITNFAVTQRYV  
SPMNVDEGVRHWLRELAAPGSGEVMFMGAVGRAPTPMQIKGFVPIRELPNIGELVTRRHH  
VGEPVRF RPFKR FESRYAIDPAVAPYAHAFRFNGRAVL PASLVLEHACAVGDWVMPPTGE  
PRELSEMTNVVLRLDALPDVPAGGAPVELASEAAGYMIGDVWCVDVRCSDARTQAELLSM  
TLVYRPQPEQIGAAFARAPDTTPEPAPLTSAPHAAWN GELLPAGDWSVPDDASAGIVRIG  
RVPSAAVLSLWALPFPLELRLPVNHVEHVLRVLLAEWGAARADAPAVWRIGGAKLARLPA  
ASADGVVEYAAGRFAVL DARGYVLLRIDDARVDGEPAQAALPETGALADPLTA

>DM55\_3675|KEGG|CYP1488A1|[Burkholderia mallei]bmal|BP

MNGLPLSLPRVDSTDSL FADPLAFLARARAQCGDV FVLREHGPIFSRASDCSGVIAVFGE

HRLRQVLTETDTFALPMSAAKMALPKNLVNLRGLHSMREPEHGRHKRLLTGTANRALF  
DAHRSGMQTDLSRFEMLNGDGRISVVSRMRELTAKLASRLFLGPQCEEDAELTFLLSAY  
FTLRREASSPNAHDPLQYRDALIGAGRQLDRALRARIRRYRKAPAGECAGLLQRLATAGQ  
PGSPALSEDEIVGHANVMFVSSTEPVAISLAWLLLVLSQLPDLRRALRAESAARASSPAS  
PYDAPLLERVINETLRLLTPNALMVRATTQAVSLQGVALPARCEIVVCPFLVHREANAF  
RPHAFLPSRWETARPSPYEYFPPFGAGGHFCAGRNLALSLIGEVLTLLSRFDFVLDIEQF  
IDWRIHIMLMPKGDPTLT AHPVDERRDTPSPKWRGPVAELFHFAPGLS

>DM78\_4548|KEGG|CYP1488A1|[Burkholderia mallei]bmae|BP

MNGLPLSLPRVDSTDSL FADPLAFLARARAQCGDV FVLREHGPIFSRASDCSGVIAVFGE  
HRLRQVLTETDTFALPMSAAKMALPKNLVNLRGLHSMREPEHGRHKRLLTGTANRALF  
DAHRSGMQTDLSRFEMLNGDGRISVVSRMRELTAKLASRLFLGPQCEEDAELTFLLSAY  
FTLRREASSPNAHDPLQYRDALIGAGRQLDRALRARIRRYRKAPAGECAGLLQRLATAGQ  
PGSPALSEDEIVGHANVMFVSSTEPVAISLAWLLLVLSQLPDLRRALRAESAARASSPAS  
PYDAPLLERVINETLRLLTPNALMVRATTQAVSLQGVALPARCEIVVCPFLVHREANAF  
RPHAFLPSRWETARPSPYEYFPPFGAGGHFCAGRNLALSLIGEVLTLLSRFDFVLDIEQF  
IDWRIHIMLMPKGDPTLT AHPVDERRDTPSPKWRGPVAELFHFAPGLS

>DM76\_4371|KEGG|CYP1488A1|[Burkholderia mallei]bmaq|BP

MNGLPLSLPRVDSTDSL FADPLAFLARARAQCGDV FVLREHGPIFSRASDCSGVIAVFGE  
HRLRQVLTETDTFALPMSAAKMALPKNLVNLRGLHSMREPEHGRHKRLLTGTANRALF  
DAHRSGMQTDLSRFEMLNGDGRISVVSRMRELTAKLASRLFLGPQCEEDAELTFLLSAY  
FTLRREASSPNAHDPLQYRDALIGAGRQLDRALRARIRRYRKAPAGECAGLLQRLATAGQ  
PGSPALSEDEIVGHANVMFVSSTEPVAISLAWLLLVLSQLPDLRRALRAESAARASSPAS  
PYDAPLLERVINETLRLLTPNALMVRATTQAVSLQGVALPARCEIVVCPFLVHREANAF  
RPHAFLPSRWETARPSPYEYFPPFGAGGHFCAGRNLALSLIGEVLTLLSRFDFVLDIEQF  
IDWRIHIMLMPKGDPTLT AHPVDERRDTPSPKWRGPVAELFHFAPGLS

>AIO61053.1|NBI|CYP1013A3|[Burkholderia mallei]bmaq|BP

MSKHRQAPGPRGGLVMGNLAAYKRN PITMLRLHQYGDVARNRLGP FVTHALAHDPDHIQ  
YVLQENHRNYVRGRFYDNFKMFFGDGLLT DGEFWRRHRRVVQPLFHKKQVDAHTAAVGD

AALALAYRWSALPPGKALDVVEEMHLSLRMLGLMVFNTDVSSHAEAAGPAVRFGIEAMM  
PQGNLNDFI PRWAPTRFNRRIAHARRAIDTIVAKI IADHREARCEPSDVISL LLLNARDPD  
TGAPMTQQEVHDEVMTVFLAGHETTGAGLAWALYALAQH PAVLRQLRDELDARLGGRAPT  
VQDFEQLPYLSQVVDEVLRVYPP I WGFTRDLVEDDEIGGYRIPARSSVFMSPYVTHRHPA  
FWRNPDAFDPENFASDAPARHRFVYFPFGGMRKCIGFQTALLQMRVLVAVVAQHFDLNA  
LPGHPIELGATISLRPVHGIRLIVKPRERQQSHLARVREHESARALRPLGDTATTAGAAC  
PMTAAREPGASAAAALAAVEAGALDAAHRGGAAAAAAGEPCPPRPDAEAAPLPLAAAPAPA  
SPAVDADASARGVPAWRFTWRPVPVDPVPDEPSPALSGRRIALVNGRGGTAERVAALAR  
TCAKVS VFAPAASADHAEAARVVFVNEAGPLDGIVDLGLEAPFALDDAGAW EAPMRRTVEL  
LKACYGDWAAEDDTSRLFYVALTWMDGQMGYGETAGAQLGGLWAGLAKTLPQELPNCNV  
RVLDIAPDETGRVDRLVVNELYRWGLFEVGYRGGVRYTLHAKRNELPPHAVDARTTLGAG  
DTVLFSGGARGIGLLCARSLAERHGCTVIVTGRET PPDGGE PWMALDEPGFKHYGLEQLR  
AATPEHPPKAIRAA LQRLKRRRELRTALDEMAALGLPVHYRVCDVTDRAAVRALCDELGD  
SLRMVIHNAGVDRPVRLIQKRAEDFADTVRTKVLGFANLCDAVRARPRLVQFCNVGSLTG  
RWGGMTGETDYAAANEALARLGLWAARHAFSPACGVKTLVWPTWEGVGMITNFAVTQRYV  
SPMNVDEGVRHWLRELAAPGSGEVMFMGAVGRAPTPMQIKGFVPIRELPNIGELVTRRHH  
VGEPVRFRFPKRFESRYAIDPAVAPYAHAFRFNGRAVL PASLVLEHACAVGDWVMPPTGE  
PRELSEMTNVVLRLDALPDVPAGGAPVELASEAAGYMIGDVWCVDVRCSDARTQAELLSM  
TLVYRPQPEQIGAAFARAPDTTPEPAPLTSAPHAAWN GELLPAGDWSVPDDASAGIVRIG  
RVPSAAVLSLWALPFPLELRLPVNHVEHVLRVLLAEWGAARADAPAVWRIGGAKLARLPA  
ASADGVVEYAAGRFAVL DARGYVLLRIDDARVDGEPAQAALPETGALADPLTA

>DM57\_05130|KEGG|CYP1488A1|[Burkholderia mallei]bmai|BP

MNGLPLSLPRVDSTDSL FADPLAFLARARAQCGDV FVLREHGPIFSRASDCSGVIAVFGE  
HRLRQVLTTETDTFALPMSAAKMALPKNLVNLNRGLHSMREPEHGRHKRLLTGTANRALF  
DAHRSGMQTDLSRFCEMLNGDGRI SVVSRMRELTAKLASRLFLGPQCEEDAE LTFLLSAY  
FTLRREASSPNAHDPLQYRDALIGAGRQLDRALRARI RYRKAPAGECAGLLQRLATAGQ  
PGSPALSEDEIVGHANVMFVSSTEPVAISLAWLLLVLSQLPDLRRALRAESAARASSPAS

PYDAPLLERVINETLRLLLTPNALMVRATTQAVSLQGVALPARCEIVVCPFLVHREANAFARPHAFLPSRWETARPSPYEYFPPFGAGGHFCAGRNLALESLIGEVLSLTSRFDVLDIEQFIDWRIHIMLMPKGDPTLTAHPVDERRDTPSPKWRGPVAELFHFAPGLS

>DM57\_07635|KEGG|CYP116B23|[Burkholderia mallei]bmai|BP

MTTHSASTPPALPAAQCPFRPVSDDAAAHAPAGCPASAGAAAFDPFDDAYQQDPPEYVRWAREREPVFYSPKLGYWVVARYDDIKTIFRDNRTFSPSIALEKITPTGPDANAALASYGYAMGRTLVDNEDEPTHMARRRLLEPFTPDALRAHEPMVRRRLAREYVDRFVDDGRADLVDQMLWEVPLTVALHFLGVPEADMDTLRAYSIAHTVNTWGRPRPDEQVAVAHAVGQFWQYAGKVLEQMREDPSGPGWMQFGIRMQREHPDIVTDSYLHSMMMAGIVAAHETTANATANALKLLEHPRAWRELCDPALIPNAVDECLRHSGSIVAWRRIATRDTVGGVAIPAGAKLLIVTSSANRDERRFADPDLFDIHRDNPADHLTFGYGSHQCMGKHLARMEMQIFIDELSRRLPHMRLAEQRFTYVPNTSFRGPEHLWVEWEPAENPQRRGHGARRCALAVRIGESNARRAGRALRVDSVMPVAERVLRLVRLVAPDGAPLPRWSAGAHIDVECGDTGLSRQYSLCGDPAERGVEIIVLR EPASRGGSAAWMHERLRPGMRVKIRGPRNHFRDLGHAARAILIAGGIGITPIGAIAREARARGIDYALHYCGRSRRTMAFVDELAALHGERLRLHVSDEGTRHDFSALDVAAGTQVYACGPARMLDALAACAAHWPAAHALRVEHFAAAAPRVDPRTDQPFLEVELKDSGLTLTVPANRTLLATLRAANVDVQSDCEEGLCGSCEVRVLAGEVDHRDSVLSADERALNTRMMACCSRARHGRLVLEL

>DM57\_14575|KEGG|CYP1013A3|[Burkholderia mallei]bmai|BP

MSKHRQAPGPRGGLVIGNLAAYKRNPIITMLRLHQQYGDVARNRLGPFVTHALAHDPDHIQYVLQENHRNYVRGRFYDNFKMFFGDGLLTDDGEFWRRHRRVVQPLFHKKQVDAHTAAVGD AALALAYRWSALPPGKALDVVEEMMHLSLRMLGLMVFNNTDVSSHAEAAAGPAVRFGIEAMPQGNLNDFI PRWAPTRFNRRIAHARRAIDTIVAKIIADHREARCEPSDVISLLLNARDPD TGAPMTQQEVHDEVMTVFLAGHETTGA GLAWALYALAQHPAVLRQLRDELDARLGGRAPT VQDFEQLPYLSQVVDEVLRVYPPIWGFTRD LVEDDEIGGYRIPARSSVFMSPYVTHRHPA FWRNPDAFDPENFASDAPARHRFVYFPPFGGMRKCIGFQTALLQMRVLVAVVAQHFDLNA L PGHPIELGATISLRPVHGIRLIVKPRERQQSHLARVREHESARALRPLGDTATTAGAAC PMTAAREPGASAAALAAVEAGALDAAHRGGAAAAAAGEPCPPRDPAEAAPLPLAAAPAPA



SPAVDADASARGVPAWRFTWRPVPVDPVPDEPSPALSGRRIALVNGRGGTAERVAALAR  
TCAKVSVFAPAASADHAEARVVFVNEAGPLDGIVDLGLEAPFALDDAGAWEAPMRRTVEL  
LKACYGDWAAEDDTSRLFYVALTWMDGQMGYGETAGAQPLGGLWAGLAKTLPQELPNCNV  
RVLDIAPDETGRVDRLVVNELYRWGLFEVGYRGGVRYTLHAKRNELPPHAVDARTTLGAG  
DTVLFSSGGARGIGLLCARSLAERHGCTVIVTGRETTPDGGEPPMALDEPGFKHYGLEQLR  
AATPEHPPKAIRAAALQRLKRRRELRTALDEMAALGLPVHYRVCDVTDRAAVRALCDELGD  
SLRMVIHNAGVDRPVRLIQKRAEDFADTVRTKVLGFANLCDAVRARPRLVQFCNVGSLTG  
RWGGMTGETDYAAAANEALARLGLWAARHAFSPACGVKTLVWPTWEGVGMITNFAVTQRYV  
SPMNVDEGVRHWLRELAAPGSGEVMFMGAVGRAPTQMQUIKGFVPIRELPNIGELVTRRHH  
VGEPVRFRPFKRFESRYAIDPAVAPYAHAFRFNGRAVLPAASLVLEHACAVGDWVMPPTGE  
PRELSEMTNVVLRLDALPDVPAGGAPVELASEAAGYMIGDVWCVDVRCSDARTQAELLSM  
TLVYRPQPEQIGAAFARAPDTPPEPAPLTSAPHAAWNCELLPAGDWSVPDDASAGIVRIG  
RVPSAAVLSLWALPFPLELRLPVNHVEHVLRLVLLAEWGAARADAPAVWRIGGAKLARLPA  
ASADGVVEYAAGRFAVLDAARGYVLLRIDDARVDGEPAQAALPETGALADPLTA

>DM51\_3802|KEGG|CYP1488A1|[Burkholderia mallei]bmaf|BP

MNGLPLSLPRVDSTDSLFAFLARARAQCGDVFLREHGPIFSRASDCSGVIAVFGE  
HRLRQVLTTETDTFALPMSAAAKMALPKNLVNLNRGLHSMREPEHGRHKRLTGTANRALF  
DAHRSGMQTDLSRFCEMLNGDGRISVVSARMRELTAKLASRLFLGPQCEEDAELTFLLSAY  
FTLRREASSPNAHDPLQYRDALIGAGRQLDRALRARIRRYRKAPAGECAGLLQRLATAGQ  
PGSPALSEDEIVGHANVMFVSSTEPVAISLAWLLLVLSQLPDLRRALRAESAARASSPAS  
PYDAPLLERVINETLRLLTNALMVRATTQAVSLQGVALPARCEIVVCPFLVHREANAF  
RPHAFLPSRWETARPSPYEYFPFGAGGHFCAGRNLALSLIGEVLTLLSRFDFVLDIEQF  
IDWRIHIMLPKGDPTLTAHPVDERRDTPSPKWRGPVAELFHFAPGLS

>AIP73255.1|NCBI|CYP1013A3|[Burkholderia mallei]bmaf|BP

MSKHRQAPGPRGGLVMGNLAAYKRNPITMLRLHQYGDVARNRLGPFVTHALAHDPDHIQ  
YVLQENHRNYVRGRFYDNFKMFFGDGLLTDDGEFWRRHRRVVQPLFHKKQVDAHTAAVGD  
AALALAYRWSALPPGKALDVVEEMHLSLRMLGLMVFNNTDVSSHAEAAGPAVRFGIEAMM  
PQGNLNDFI PRWAPTRFNRRIAHARRAIDTIVAKIIADHREARCEPSDVISLNLNARDPD

TGAPMTQQEVHDEVMTVFLAGHETTGAGLAWALYALAQHPAVLRQLRDELDARLGGRAPT  
VQDFEQLPYLSQVVDEVLRVYPPIWGFTRDLDVEDDEIGGYRIPARSSVFMSPYVTHRHPA  
FWRNPDAFDPENFASDAPARHRFVYFPFGGGMKRCIGFQTALLQMRVLVAVVAQHFDLNA  
LPGHPIELGATISLRPVHGIRLIVKPRERQQSHLARVREHESARALRPLGDTATTAGAAC  
PMTAAREPGASAAALAAVEAGALDAAHRGGAAAAAAGEPCPPRDPAEAAPLPLAAAPAPA  
SPAVDADASARGVPAWRFTWRPVPVDPVPDEPSPALSGRRIALVNGRGGTAERVAAALAR  
TCAKVSVFAPAASADHAEAARVVFVNEAGPLDGIVDLGLEAPFALDDAGAWAEPMRRTVEL  
LKACYGDWAAEDDTSRLFYVALTWMDGQMGYGETAGAQPLGGLWAGLAKTLPQELPNCNV  
RVLDIAPDETGRVDRLLVVELYRWGLFEVGYRGGVRYTLHAKRNELPPHAVDARTTLGAG  
DTVLFSGGARGIGLLCARSLAERHGCTVIVTGRETTPDGGEPPMALDEPGFKHYGLEQLR  
AATPEHPPKAI RAALQRLKRRRELRTALDEMAALGLPVHYRVCDVTDRAAVRALCDELGD  
SLRMVIHNAGVDRPVRLIQKRAEDFADTVRTKVLGFANLCDAVRARPRLVQFCNVGSLTG  
RWGGMTGETDYAAANEALARLGLWAARHAFSPACGVKTLVWPTWEGVGMITNFAVTQRYV  
SPMNVDEGVRHWLRELAAPGSGEVMFMGAVGRAPTPMQIKGFVPIRELPNIGELVTRRHH  
VGEPVRFRFPKRFESRYAIDPAVAPYAHAFRFNGRAVLPA SLVLEHACAVGDWVMPPTGE  
PRELSEMTNVVLRLDALPDVPAGGAPVELASEAAGYMIGDVWCVDVRCSDARTQAELLSM  
TLVYRPQPEQIGAAFARAPDTTPEPAPLTSAPHAAWNCELLPAGDWSVPDDASAGIVRIG  
RVPSAAVLSLWALPFPLELRLPVNHVEHVLRVLLAEWGAARADAPAVWRIGGAKLARLPA  
ASADGVVEYAAGRFAVL DARGYVLLRIDDARVDGEPAQAALPETGALADPLTA

>BM44\_3635|KEGG|CYP1488A1|[Burkholderia mallei]bmaz|BP

MNGLPLSLPRVDSTDSL FADPLAFLARARAQCGDVFLREHGPIFSRASDCSGVIAVFGE  
HRLRQVLTETDTFALPMSAAAKMALPKNLVNLNRGLHSMREPEHGRHKRLLTGTANRALF  
DAHRSGMQTDLSR FCEMLNGDGRISVVS RMREL TAKLASRLFLGPQCEEDAELTFLLSAY  
FTLRREASSPNAHDPLQYRDALIGAGRQLDRALRARIRRYRKAPAGECAGLLQRLATAGQ  
PGSPALSEDEIVGHANVMFVSSTEPVAISLAWLLLVLSQLPDLRRALRAESAARASSPAS  
PYDAPLLERVINETLRL LTPNALMVRATTQAVSLQGVALPARCEIVVCPFLVHREANAFA  
RPHAFLPSRWETARPSPYEYFPFGAGGHFCAGRNLALSLIGEV LSTLLSRFDFVLDIEQF  
IDWRIHIMLMPKGDPTLT AHPVDERRDTPSPKWRGPVAELFHFAPGLS

>ABM99991.2|NCBI|CYP1013A3|[Burkholderia mallei]bmaz|BP

MSKHRQAPGPRGGLVMGNLAAYKRNPITMLLR LHQQYGDVARNRLGPFVTHALAHDPDHIQ  
YVLQENHRNYVRGRFYDNFKMFFGDGLLTDDGEFWRRHRRVVQPLFHKKQVDAHTAAVGD  
AALALAYRWSALPPGKALDVVEEMHLSLRMLGLMVFN TDVSSHAEAAGPAVRFGIEAMM  
PQGNLNDFI PRWAPTRFNRRIAHARRAIDTIVAKI IADHREARCEPSDVISL LLLNARDPD  
TGAPMTQQEVHDEVMTVFLAGHETT GAGLAWALYALAQH PAVLRQLRDELDARLGGRAPT  
VQDFEQLPYLSQVVDEVLRVYPPIWGFTRDLVEDDEIGGYRIPARSSVFMSPYVTHRHPA  
FWRNPDAFDPENFASDAPARHRFVYFPFGGGMKRCIGFQTALLQMRVLVAVVAQHFDLNA  
LPGHPIELGATISLRPVHGIRLIVKPRERQQSHLARVREHESARALRPLGDTATTAGAAC  
PMTAAREPGASAAALAAVEAGALDAAHRGGAAAAAAGEPCPPRDPAEAAPLPLAAAPAPA  
SPAVDADASARGVPAWRFTWRPVVPVDPVDEPSPALSGRRIALVNGRGGTAERVAAALAR  
TCAKVSVFAPAASADHAEAARV FVNEAGPLDGI VDLGLEAPFALDDAGAW EAPMRRTVEL  
LKACYGDWAAEDDTSRLFYVALTWMDGQMGYGETAG AQPLGGLWAGLAKTLPQELPNCNV  
RVLDIAPDETGRVDRLVVNELYRWGLFEVGYRGGVRYTLHAKRNELPPHAVDARTTLGAG  
DTVLFSGGARGIGLLCARSLAERHGCTVIVTGRET PPDGGE PWMALDEPGFKHYGLEQLR  
AATPEHPPKAIRAA LQRLKRRRELRTALDEMAALGLPVHYRVCDVTDRAAVRALCDELGD  
SLRMVIHNAGVDRPVRLIQKRAEDFADTVRTKVLGFANLCDAVRARPRLVQFCNVGSLTG  
RWGGMTGETDYAAANEALARLGLWAARHAFSPACGVKTLVWPTWEGVGMITNFAVTQRYV  
SPMNVDEGVRHWLRELAAPGSGEVMFMGAVGRAPT PMQIKGFVPIRELPNIGELVTRRH  
VGEPVRFRPFKRFE SRYAIDPAVAPYAHAFRFNGRAVL PASLVLEHACAVGDWVMPPTGE  
PRELSEMTNVVLRLDALPDVPAGGAPVELASEAAGYMIGDVWCVDVRCSDARTQAELLSM  
TLVYRPQPEQIGAAFARAPD TTPEPAPLTSAPHAAWN GELLPAGDWSVPDDASAGIVRIG  
RVPSAAVLSLWALPFPLELR LPVNHVEHVLRVLLAEWGAARADAPAVWRIGGAKLARLPA  
ASADGVVEYAAGRFAVL DARGYVLLRIDDARVDGEPAQAALPETGALADPLTA

>BM45\_4412|KEGG|CYP1488A1|[Burkholderia mallei]bmab|BP

MNGLPLSLPRVDSTDSL FADPLAFLARARAQCGDV FVLREHGPIFSRASDCSGVIAVFGE  
HRLRQVLTETDTFALPMSAAAKMALPKNLVNLNRGLHSMREPEHGRHKRLLTGTANRALF

DAHRSGMQTDLSRFCEMLNGDGRISVVSARMRELTAKLASRLFLGPQCEEDAELTFLLSAY  
FTLRREASSPNAHDPLQYRDALIGAGRQLDRALRARIRRYRKAPAGECAGLLQRLATAGQ  
PGSPALSEDEIVGHANVMFVSSTEPVAISLAWLLLVLSQLPDLRRALRAESAARASSPAS  
PYDAPLLERVINETLRLTPNALMVRATTQAVSLQGVALPARCEIVVCPFLVHREANAF  
RPHAFLPSRWETARPSPYEYFPFGAGGHFCAGRNLALSLIGEVLTLLSRFDFVLDIEQF  
IDWRIHIMLMPKGDPTLTAHPVDERRDTPSPKWRGPVAELFHFAPGLS

> AJX04323.1 | NCBI | CYP1013A3 | [Burkholderia mallei]bmab | BP

MSKHRQAPGPRGGLVMGNLAAYKRNPITMLLRHQQYGDVARNRLGPFVTHALAHDPDHIQ  
YVLQENHRNYVRGRFYDNFKMFFGDGLLTDDGEFWRRHRRVVQPLFHHKQVDAHTAAVGD  
AALALAYRWSALPPGKALDVVEEMHLSLRMLGLMVFNNTDVSSHAEAAGPAVRFGIEAMM  
PQGNLNDFI PRWAPTRFNRRIAHARRAIDTIVAKIIADHREARCEPSDVISLLLNARDPD  
TGAPMTQQEVHDEVMTVFLAGHETTGAGLAWALYALAQHPAVLRQLRDELDARLGGRAPT  
VQDFEQLPYLSQVVDEVLRVYPPIWGFTRDLVEDDEIGGYRIPARSSVFMSPYVTHRHPA  
FWRNPDAFDPENFASDAPARHRFVYFPFGGMRKCIGFQTALLQMRVLVAVVAQHFDLNA  
LPGHPIELGATISLRPVHGIRLIVKPRERQQSHLARVREHESARALRPLGDTATTAGAAC  
PMTAAREPGASAAAALAAVEAGALDAAHRGGAAAAAAGEPCPPRDPAEAAPLPLAAAPAPA  
SPAVDADASARGVPAWRFTWRPVDPVDPDEPSPALSGRRIALVNGRGGTAERVAALAR  
TCAKVSVFAPAASADHAEAARVVFVNEAGPLDGI VDLGLEAPFALDDAGAWAEPMRRTVEL  
LKACYGDWAAEDDTSRLFYVALTWMDGQMGYGETAGAQPLGGLWAGLAKTL PQELPNCNV  
RVLDIAPDETGRVDRLLVVELYRWGLFEVGYRGGVRYTLHAKRNELPPHAVDARTTLGAG  
DTVLFSGGARGIGLLCARSLAERHGCTVIVTGRET PPDGGEPPMALDEPGFKHYGLEQLR  
AATPEHPPKAI RAALQRLKRRRELRTALDEMAALGLPVHYRVCDVTDRAAVRALCDELGD  
SLRMVIHNAGVDRPVRLIQKRAEDFADTVRTKVLGFANLCDAVRARPRLVQFCNVGSLTG  
RWGGMTGETDYAAAANEALARLGLWAARHAFSPACGVKTLVWPTWEGVGMITNFAVTQRYV  
SPMNVDEGVRHWLRELAAPGSGEVMFMGAVGRAPTPMQIKGFVPIRELPNIGELVTRRHH  
VGEPVRFRFPKRFESRYAIDPAVAPYAHAFRFNGRAVL PASLVLEHACAVGDWVMPPTGE  
PRELSEMTNVVLRLDALPDVPAGGAPVELASEAAGYMIGDVWCVDVRCSDARTQAELLSM

TLVYRPQPEQIGAAFARAPDTTPEPAPLTSAPHAAWNCELLPAGDWSVPDDASAGIVRIG  
RVPSAAVLSLWALPFPLELRLPVNHVEHVLRVLLAEWGAARADAPAVWRIGGAKLARLPA  
ASADGVVEYAAGRFAVLDDARGYVLLRIDDARVDGEPAQAALPETGALADPLTA

>BPSS1654|KEGG|CYP116B23|[Burkholderia pseudomallei]bps|BP

MTTHSASTPPALPAAQCPFRPVSDDAAHPARCPASAGAAAFDPFDDAYQQDPPEYVRWA  
REREPVFYSPKLGWVVARYYDDIKTIFRDNRTFSPSIALEKITPTGPDANAALASYGYAM  
GRTLVDNEDEPTHMARRRLLEPFTPDALRAHEPMVRLAREYVDRFVDDGRADLVDQMLW  
EVPLTVALHFLGVPEADMDTLRAYSIAHTVNTWGRPRPDEQVAVAHAVGQFWQYAGKVLG  
KMREDPSGPGWMQFGIRMQREHPDIVTDSYLHSMMAAGIVAAHETTANATANALKLLEH  
PRAWRELCDDPALIPNAVDECLRHSGSIVAWRRIATRDTVGGVAIPAGAKLLIVTSSAN  
RDERRFADPDLFDIHRDNPADHLTFGYGSHQCMGKHLARMEMQIFIDELSRRLPHMRLAE  
QRFTYVPNTSFRGPEHLWVEWAPAENPQRRGHGARRCALAVRIGESNARRAGRALRVDSV  
MPVAERVLRLVRLVAPDGAPLPRWSAGAHIDVECGDTGLSRQYSLCGDPAERGVYEIAVLR  
EPASRGGSAAWLHERLRPGMRVKIRGPRNHFRDLGHAARAILIAGGIGVTPIGAIAREARA  
RGIDYALHYCGRSRRTMAFVDELAALHGERLRLHVSDEGTRHDFSALDVAAGTQVYACGP  
ARMLDALAACAAHWPAAHALRVEHFAAAAPRVDPRTDQPFLEVELKDSGLTLTPANRTLLA  
TLRAANVDVQSDCEEGLCGSCEVRVLAGEVDHRDSVLSADERALNTRMMACCSRARRGRL  
VLEL

>BPSS2327|KEGG|CYP1013A3|[Burkholderia pseudomallei]bps|BP

MSKHRQAPGPRGGLVMGNLAAYKRNPITMLLRLHQYGDVARNRLGPFVTHALAHDPDHIQ  
YVLQENHRNYVRGRFYDNFKMFFGDGLLTDDGEFWRRHRRVVQPLFHKKQVDAHTAAVGD

AALALAHRSALPPGKALDVVEEMHLSLRMLGLMVFNTDVSSHAEAVGPAVRFGIEAMM  
PQGNLNDFI PRWAPTRFNRRIAHARRAIDTIVAKI IADHREARCEPSDVISL LLLNARDPD  
TGAPMTQQEVHDEVMTVFLAGHETT GAGLAWALYALAQH PAVLRQLRDELDARLGGRAPT  
VQDFEQLPYLSQVVDEVLRVYPP I WGFTRDLVEDDE IGGYRIPARSSVFMSPYVTHRHPA  
FWRNPDAFDPENFASDAPARHRFVYFPFGGMRKCIGFQTALLQMRVLVAVVAQHFDLNA  
LPGHPIELGATISLRPVHGIRLIVKPRERQQSHLARVREHESARALRPLGDTATTAGAAC  
PMTAAREPGASAAALAAVEAGALDAAHRGGAAAAAAGEPCPPRPDAEAAPLPLAASPAPA  
SPAVDADASARGVPAWRFTWRPVVPVDPVPDEPSPALSGRRIALVNGRGGTAERVAALAR  
TCAKVSVFAPAASADHAEAARVFN EAGPLDGI VDLGLEAPFALDDAGAW EAPMRRTVEL  
LKACYGDWAAEDDTSRLFYVALTWMDGQMGYGETAGAQLGGLWAGLAKTLPQELPNCNV  
RVLDIAPDETGRVDRLVVNELYRWGLFEVGYRGGVRYTLHAKRNELPPHAVDARTTLGAG  
DTVLFSGGARGIGLLCARALAERHGCTVIVTGRET PPDGGE PWMALDEPGFKHYGLEQLR  
AATPEHPPKAI RAALQRLKRRRELKTALDEMAALGLPVHYRVCDVTDRAAVRALCDELGD  
SLRMVIHNAGVDRPVRLIQKRAEDFADTVRTKVLGFANLCDAVRARPRLVQFCNVGSLTG  
RWGGMTGETDYAAANEALARLGLWAARHAFSPACGVKTLVWPTWEGVGMITNFAVTQRYV  
SPMNVDEGVRHWLRELATPGSGEVMFMGAVGRAPT PVQIKGFVPIREL PNIGELVTRRHH  
VGEPVRF RPFKR FESRYAIDPAVAPYAHAFRFNGRAVL PASLVLEHACAVGDWVMPPTGE  
PRELSEMTNVVLRLDALPDVPAGGAPVELASEAAGYMIGDVWCVDVRCSDARTQAELLSM  
TLVYRPQPEQIGAAFARAPDTTPEPAPLTSAPHAAWN GELLPAGDWSVPDDASAGIVRIG  
RVPPAAVLSLWALPFPLELRLPVNHVEHVLRVLLAEWGAARADAPAVWRIGGAKLARLPA  
ASADGVVEYAAGRFAVL DARGYVLLRIDDARVDGEPAQAALPETGALADPLTA

>BURPS1710b\_A0717|KEGG|CYP116B23|[Burkholderia pseudomallei]bpm|BP

MTTHSASTPPALPAAQCPFRPVSDDAAAH PARCPASAGAAAFDPFDDAYQQDPPEYVRWA  
REREPVFYSPKLG YWV VARYDDIKTIFRDNRTFSPSIALEKITPTGPDANAALASYGYAM  
GRTL VNEDEPAHMARRRL LIEPFTPDALRAHEPMVRR LAREYVDRFVDDGRADLVDQMLW  
EVPLTVALHFLGVPEADMDTL RAYSIAHTVNTWGRPRPDEQVAVAHAVGQFWQYAGKVLE  
KMREDPSGPGWMQFGIRMQREHPDIVTDSYLHSM MMAGIVA AHETTANATANALKLLLEH  
PRAWRELCD DPALIPNAVDECLRHSGSIVAWRRIATR DATVGGVAIPAGAKLLIVTSSAN  
RDERRFADPDLFDIHRDNPADHLTFGYGSHQCMGKHLARMEMQIFIDELSRRLPHMRLAE  
QRFTYVPNTSFRGPEHLWVEWAPAENPQRRGHGARRCALAVRIDESNARRAGRALRVDSV  
MPVAERVLRLVAPDGAPLPRWSAGAHIDVECGDTGLSRQYSLCGDPAERGVYEIAVLR

EPASRGGSAWLHERLRPGMRVKIRGPRNHFRLDGHAARAILIAGGIGITPIGAIAREARA  
RGIDYALHYCGRSRRTMAFVDELAALHGERLRLHVSDEGTRHDFSALDVAAGTQVYACGP  
ARMLDALAACAAHWPAAHALRVEHFAAAAPRVDPRTDQPFLEVELKDSGLTTLVPANRTLLA  
TLRAANVDVQSDCEEGLCGSCEVRVLAGEVDHRDSVLSADERALNTRMMACCSRARHGRL  
VLEL

>BURPS1710b\_A1475|KEGG|CYP1013A3|[Burkholderia pseudomallei]bpm|BP

MSKHRQAPGPRGGLVMGNLAAYKRNPITMLLRLHQQYGDVARNRLGPFVTHALAHDPDHIQ  
YVLQENHRNYVRGRFYDNFKMFFGDGLLTDDGEFWRRHRRVVQPLFHKKQVDAHTAAVGD  
AALALAHWSALPPGKALDVVEEMHLSLRMLGLMVFNDDVSSHAEAAGPAVRFGIEAMM  
PQGNLNDFI PRWAPTRFNRRIAHARRAIDTIVAKIIADHREARCEPSDVISLNLNARDPD  
TGAPMTQQEVHDEVMTVFLAGHETTGAGLAWALYALAQHPAVLRQLRDELDARLGGRAPT  
VQDFEQLPYLSQVVDEVLRVYPPIWGFTRDLVEDDEIGGYRIPARSSVFMSPYVTHRHPA  
FWRNPDAFDPENFASDAPARHRFVYFPFGGGMKRCIGFQTALLQMRVLVAVVAQHFDLNA  
LPGHPIELGATISLRPVHGIRLIVKPRERQQSHLARVREHESARALRPLGDTATTAGAAC  
PMTAAREPGASAAALAAVEAGALDAAHRGGAAAAAAGEPCPPRDPAEAAPLPLAAAPAPA  
SPAVDADASARGVPAWRFTWRPVPVDPVPDEPSPALSGRRIALVNGRGGTAERVAAALAR  
TCAKVSVFAPAASADHAEAARVFNVEAGPLDGI VDLGLEAPFALDDAGAWAEMRRTVEL  
LKACYGDWAAEDDTSRLFYVALTWMDGQMGYGETAGAQLGGLWAGLAKTLPQELPNCNV  
RVLDIAPDETGRVDRLVVNELYRWGLFEVGYRGGVRYTLHAKRNELPPHAVDARTTLGAG  
DTVLFSGGARGIGLLCARALAERHGCTVIVTGRETTPDGGEPPMALDEPGFKHYGLEQLR  
AATPEHPPKAIRAAALQRLKRRRELKTALDEMAALGLPVHYRVCDVTDRAAVRALCDELGD  
SLRMVIHNAAGVDRPVRLIQKRAEDFADTVRTKVLGFANLCAVRAQPRLVQFCNVGSLTG  
RWGGMTGETDYAAANEALARLGLWAARHAFSPACGVKTLVWPTWEGVGMITNFAVTQRYV  
SPMNVDEGVRHWLRELATPGSGEVMFMGAVGRAPTVPVQIKGFVPIRELPNIGELVTRRH  
VGEPVRFRFPKRFESRYAIDPAVAPYAHAFRFRNGRAVLPA SLVLEHACAVGDWVMPPTGE  
PRELSEMTNVVLRLDALPDVPAGGAPVELASEAAGYMIGDVWCVDVRCSDARTQAELLSM  
TLVYRPQPEQIGAAFARAPDTPPEAPLTSAPHAAWNCELLPAGDWSVPDDASAGIVRIG  
RVPPAAVLSLWALPFPLELRPVLNHVEHVLRVLLAEWGAARADAPAVWRIGGAKLARLPA  
ASADGVVEYAAAGRAVL DARGYVLLRIDDARVDGEPAQAALPETGALADPLTA

>BURPS1106A\_A0029|KEGG|CYP1488A1|[Burkholderia pseudomallei]bpl|BP

MNGLPLSLPRVDSTDSL FADPLAFLARARAQCGDV FVLREHGPIFSRASDCSGVIAVFGE  
HRLRQVLTETDTFALPMSAAAKMALPKNLVNLNRGLHSMREPEHGRHKRLLTGTANRALF  
DAHRSGMQTDLSRFCEMLNGDGRISVVSRMRELTAKLASRLFLGPQCEEDAELTFLLSAY  
FTLRREASSPNAHDPLQYRDALIGAGRQLDRALRARIRRYRKAPAGECAGLLQRLATAGQ  
PGSPALSEDEIVGHANVMFVSSSTEPVAISLAWLLLVLSQLPDLRRALRAESAARASSPAS  
PYDAPLLERVINETLRLLT PNALMVRATTQAVSLQGVALPARCEIVVCPFLVHREANAF  
RPHAFLPSRWETARPSPYEYFPFGAGGHFCAGRNLA SLIGEV LSTLLSRFDFVLDIEQF  
IDWRIHIMLMPKGDPTLT AHPVDERRDTPSPKWRGPVAELFH FAPGLS

>BURPS1106A\_A2242|KEGG|CYP116B23|[Burkholderia pseudomallei]bpl|BP

MTTHSASTPPALPAAQCPFRPVSDDAAAH PAGCPASAGAAAFDPFDDAYQQDPPEYVRWA  
REREPVFYSPKLG YWV VARYDDIKTIFRDNRTFSPSIALEKITPTGPDANAALASYGYAM  
GRTL VNEDEPAHMARRRL LIEPFTPDALRAHEPMVRRLAREYVDRFVDDGRADLVDQMLW  
EVPLTVALHFLGVPEADMDTL RAYSIAHTVNTWGRPRPDEQVAVAHAVGQFWQYAGKVLE  
QMREDPSGPGWMQFGIRMQREHPDIVTDSYLHSM MMAGIVAAHETTANATANALKLLLEH  
PRAWRELCDDPALIPNAVDECLRHSGSIVAWRRIATR DATVGGVAIPAGAKLLIVTSSAN  
RDERRFADPDLFDIHRDNPADHLTFGYGSHQCMGKHLARMEMQIFIDELSRRLPHMRLAE  
QRFTYVPNTSFRGPEHLWVEWAPAENPQRRGHGARRCALAVRIDESNARRAGRALRVDSV  
MPVAERVLRLVRLVAPDGAPLPRWSAGAHIDVECGDTGLSRQYSLCGDPAERG VYEIAVLR  
EPASRGGS AAWLHERLRPGMRVKIRGPRNHFR LDGHAARAILIAGGIGITPIGAIAREARA  
RGIDYALHYCGRSRRTMAFVDELAALHGERLRLHVSDEGTRHDFSALDVAAGTQVYACGP  
ARMLDALAACAAH WPAHALRVEHF AAAAPRVDPRTDQPF EVELKDSGLTLTVPANRTLLA  
TLRAANVDVQSDCEEGLCGSCEVRVLAGEVDHRDSVLSADERALNTRMMACCSRARHGRL  
VLEL

>BURPS1106A\_A3146|KEGG|CYP1013A3|[Burkholderia pseudomallei]bpl|BP



MSKHRQAPGPRGGLVMGNLAAYKRNPITMLLRLHQQYGDVARNRLGPFVTHALAHDPDHIQ  
YVLQENHRNYVRGRFYDNFKMFFGDGLLTDDGEFWRRHRRVVQPLFHKKQVDAHTAAVGD  
AALALAHRWSALPPGKALDVVEEMMHLSLRMLGLMVFNDDVSSHAEAVGPAVRFGIEAMM  
PQGNLNDFI PRWAPTRFNRRIAHARRAIDTIVAKIIADHREARCEPSDVISL LLNARDPD  
TGAPMTQQEVHDEVMTVFLAGHETT GAGLAWALYALAQHPAVLRQLRDELDARLGGRAPT  
VQDFEQLPYLSQVVDEVLRVYPPIWGFTRDLVEDDEIGGYRIPARSSVFMSPYVTHRHPA  
FWRNPDAFDPENFASDAPARHRFVYFPFGGGMKRCIGFQTALLQMRVLVAVVAQHFDLNA  
LPGHPIELGATISLRPVHGIRLIVKPRERQQSHLARVREHESARALRPLGDTATTAGAAC  
PMTAAREPGASAAALAAVEAGALDAAHRGGAAAAAAGEPCPPRDPAEAPLPLAASPAPA  
SPAVDADASARGVPAWRFTWRPVPVDPVPDEPSPALSGRRIALVNGRGGTAERVAALAR  
TCAKVSVFAPAASADHAEAAARVFN EAGPLDGLVDLGLEAPFALDDAGAW EAPMRRTVEL  
LKACYGDWAAEDDTSRLFYVALTWMDGQMGYGETAGAQPLGGLWAGLAKTLPQELPNCNV  
RVLDIAPDETGRVDRLVVNELYRWGLFEVGYRGGVRYTLHAKRNELPPHAVDARTTLGAG  
DTVLFSGGARGIGLLCARALAE RHGCTVIVTGRET PPDGGEPWMALDEPGFKHYGLEQLR  
AATPEHPPKAIRAA LQRLKRRRELRTALDEMAALGLPVHYRVCDVTDRAAVRALCDELGD  
SLRMV IHNAGVDRPVRLIQKRAEDFADTVRTKVLGFANLCDAVRARPRLVQFCNVGSLTG  
RWGGMTGETDYAAANEALARLGLWAARHAFSPACGVKTLVWPTWEGVGMITNFAVTQRYV  
SPMNVDEGVRHWLRELAAPGSGEVMFMGAVGRAPT PVQIKGFVPIRELPNIGELVTRRH  
VGEPVRFRFPKRFESRYAIDPAVAPYAHAFR FNGRAVL PASLVLEHACAVGDWVMPPTGE  
PRELSEMTNVVLRLDALPDVPAGGAPVELASEAAGYMIGDVWCVDVRCSDARTQAELLSM  
TLVYRPQPEQIGAAFARAPDTTPEPAPLTSAPHAAWN GELLPAGDWSVPDDASAGIVRIG  
RVPPAAVLSLWALPFPLELRLPVNHVEHVLRVLLAEWGAARADAPAVWRIGGAKLARLPA  
ASADGVVEYAAGRFAVL DARGYVLLRIDDARVDGEPAQAALPETGALADPLTA

>BURPS668\_A3260|KEGG|CYP1013A3|[Burkholderia pseudomallei]bpd|BP

MSKHRQAPGPRGGLVMGNLAAYKRNPITMLLRLHQQYGDVARNRLGPFVTHAVAHDPDHIQ  
YVLQENHRNYVRGRFYDNFKMFFGDGLLTDDGEFWRRHRRVVQPLFHKKQVDAHTAAVGD

AALALAHRWSALPPGKALDVVEEMHLSLRMLGLMVFN TDVSSHAEAVGPAVRFGIEAMM  
PQGNLNDFI PRWAPTRFNRRIAHARRAIDTIVAKI IADHREARCEPSDVISL LLLNARDPD  
TGAPMTQQEVHDEVMTVFLAGHETTGAGLAWALYALA QHPAVLRQLRDELDARLGGRAPT  
VQDFEQLPYLSQVVDEVLRVYPPIWGFTRDLVEDDEI GGYRIPARSSVFMSPYVTHRHPA  
FWRNPDAFDPENFASDAPARHRFVYFPFGGMRKCIGF QTALLQMRVLVAVVAQHFDLNA  
LPGHPIELGATISLRPVHGIRLIVKPRERQQSHLARVRE HESARALRPLGDTATTAGAAC  
PMTAAREPGASAAAALAAVEAGALDAAHRGGAAAAA AGEPCPPRDPAEAAPLPLAAAPAPA  
SPAVDADASARGVPAWRFTWRPVVPVDPVDEPSPALS GRRIALVNGRGGTAERVAALAR  
TCAKVS VFAPAASADHAEAAARVFVNEAGPLDGI VDLGLEAPFALDDAGAW EAPMRRTVEL  
LKACYGDWAAEDDTSRLFYVALTWMDGQMGYGETAGA QPLGGLWAGLAKTLPQELPNCNV  
RVLDIAPDETGRVDRLVVNELYRWGLFEVGYRGGVRYT LHAKRNELPPHAVDARTTLGAG  
DTVLFSGGARGIGLLCARALAERHGCTVIVTGRET PPDGGE PWMALDEPGFKHYGLEQLR  
AATPEHPPKAI RAALQRLKRRRELRTALDEMAALGL PVHYRVCDVTDRAAVRALCDELGD  
SLRMVIHNAGVDRPVRLIQKRAEDFADTVRTKVLGFAN LCAVRARPRLVQFCNVGSLTG  
RWGGMTGETDYAAA NEALARLGLWAARHAFSPACGVK TLVWPTWEGVGMITNFAVTQRYV  
SPMNVDEGVRHWLRELAAPGSGEVMFMGAVGRAPT PVQIKGFVPIRELPNIGELVTRRHH  
VGEPVRFRPFKR FESRYVIDPAVAPYAHAFRFNGRAVLP ASLVLEHACAVGDWVMPPTGE  
PRELSEMTNVVLRLDALPDVPAGGAPVELASEAAGYMIG DVWCVDVRCSDARTQAELLSM  
TLVYRPQPEQIGAAFARAPDTTPEPAPLTSAPHAAWN GELLPAGDWSVPDDASAGIVRIG  
RVPPAAVLSLWALPFPLELRLPVNHVEHVLRVLLAEWGA ARADAPAVWRIGGAKLARLPA  
ASADGVVEYAAGRFAVL DARGYVLLRIDDARVDGEPAQAAL PETGALADPLTA

>ABN86800.1|NCBI|CYP1488A1|[Burkholderia pseudomallei]bpd|BP

MNGLPLSLPRVDSTDSL FADPLAFLARARAQC GDVFLREHGPIFSRASDCSGVIAVFGE  
HRLRQVLTETDTFALPMSAAKMALPKNLVNLNRGLHSM REPEHGRHKRLLTG TANRALF  
DAHRSGMQTDL SRFC EMLNGDGRI SVVSRMRELTAKLASRLFLGPQCEEDAELTFLLSAY  
FTLRREASSPNAHDPLQYRDALIGAGRQLDRALRARIRRYRKAPAGECAGLLQRLATAGQ

PGSPALSEDEIVGHANVMFVSSTEPVAISLAWLLLVLSQLPDLRRALRAESAARASSPAS  
PYDAPLLERVINETLRLLTPNALMVRATTQAVSLQGVALPARCEIVVCPFLVHREANAF  
RPHAFSPSRWETARPSPYEYFPFGAGGHFCAGRNLALSLIGEVLTLLSRFDFVLDIEQF  
IDWRIHIMLMPKGDPTLMAHPVDERRDTPSPKWRGPVAELFHFAPGLS

>BDL\_5855|KEGG|CYP1488A1|[Burkholderia pseudomallei]bpse|BP

MNGLPLSLPRVDSTDSL FADPLAFLARARAQCGDVFLREHGPIFSRASDCSGVIAVFGE  
HRLRQVLTETDTFALPMSAAKMALPKNLVNLNRGLHSMREPEHGRHKRLLTGTANRALF  
DAHRSGMQTDLSRFCEMPLNGDGRISVVSARMRELTAKLASRLFLGPQCEEDAELTFLLSAY  
FTLRREASSPNAHDPLQYRDALIGAGRQLDRALRARIRRYRKAPAGECAGLLQRLATAGQ  
PGSPALSEDEIVGHANVMFVSSTEPVAISLAWLLLVLSQLPDLRRALRAESAARASSPAS  
PYDAPLLERVINETLRLLTPNALMVRATTQAVSLQGVALPARCEIVVCPFLVHREANAF  
RPHAFSPSRWETARPSPYEYFPFGAGGHFCAGRNLALSLIGEVLTLLSRFDFVLDIEQF  
IDWRIHIMLMPKGDPTLTAHPVDERRDTPSPKWRGPVAELFHFAPGLS

>AGR69572.1|NCBI|CYP1013A3|[Burkholderia pseudomallei]bpse|BP

MSKHRQAPGPRGGLVMGNLAAYKRNPITMLLRLHQQYGDVARNRLGPFVTHALAHDPDHIQ  
YVLQENHRNYVRGRFYDNFKMFFGDGLLTDTGGEFWRRHRRVVQPLFHKKQVDAHTAAVGD  
AALALAHRSALPPGKALDVVEEMMHLSLRMLGLMVFNNTDVSSHAEAVGPAVRFGIEAMM  
PQGNLNDFI PRWAPTRFNRRIAHARRAIDTIVAKIIADHREARCEPSDVISLLLNARDPD  
TGAPMTQQEVHDEVMTVFLAGHETTGAGLAWALYALAQHPAVLRQLRDELDARLGGRAPT  
VQDFEQLPYLSQVVDEVLRVYPPIWGFTRDLVEDDEIGGYRIPARSSVFMSPYVTHRHPA  
FWRNPDAFDPENFASDAPARHRFVYFPFGGMRKCIGFQTALLQMRVLVAVVAQHFDLNA  
LPGHPIELGATISLRPVHGIRLIVKPRERQQSHLARVREHESARALRPLGDTATTAGAAC  
PMTAAREPGASAAALAAVEAGALDAAHRGGAAAAAAGEPCPPRDPAEAAPLPLAAAPAPA

SPAVDADASARGVPAWRFTWRPVPVDPVPDEPSPALSGRRIALVNGRGGTAERVAALAR  
TCAKVSVFAPAASADHAEAAARVFVNEAGPLDGIIDLGLEAPFALDDAGAWAEMRRTVEL  
LKACYGDWAAEDDTSRLFYVALTWMDGQMGYGETAGAQLGGLWAGLAKTLPQELPNCNV  
RVLDIAPDETGRVDRLVVNELYRWGLFEVGYRGGVRYTLHAKRNELPPHAVDARTTLGAG  
DTVLFSGGARGIGLLCARALAERHGCTVIVTGRETTPDGGEPPMALDEPGFKHYGLEQLR  
AATPEHPPKAIRAAALQRLKRRRELRTALDEMAALGLPVHYRVCDVTDRAAVRALCDELGD  
SLRMVIHNAGVDRPVRLIQKRAEDFADTVRTKVLGFANLCDAVRARPRLVQFCNVGSLTG  
RWGGMTGETDYAAANEALARLGLWAARHAFSPACGVKTLVWPTWEGVGMITNFAVTQRYV  
SPMNVDEGVRHWLRELAAPGSGEVMFMGAVGRAPTVPQIKGFVPIRELPNIGELVTRRH  
VGEPVRFPRPKRFESRYAIDPAVAPYAHAFRFRNGRAVLPAASLVLEHACAVGDWVMPPTGE  
PRELSEMTNVVLRLDALPDVPAGGAPVELASEAAGYMIGDVWCVDVRCSDARTQAELLSM  
TLVYRPQPEQIGAAFARAPDTTPEPAPLTSAPHAAWNCELLPAGDWSVPDDASAGIVRIG  
RVPPAAVLSLWALPFPLELRLPVNHVEHVLRVLLAEWGAARADAPAVWRIGGAKLARLPA  
ASADGVVEYAAGRFAVLDAARGYVLLRIDDARVDGEPAQAALPETGALADPLTA

>BBQ\_3721|KEGG|CYP1488A1|[Burkholderia pseudomallei]bpm|BP

MNGLPLSLPRVDSTDSLFAFLARARAQCGDVFLREHGPIFSRASDCSGVIAVFGE  
HRLRQVLTTETDTFALPMSAAKMALPKNLVNLNRGLHSMREPEHGRHKRLTGTANRALF  
DAHRSGMQTDLSRCEMLNGDGRISVVSARMRELTAKLASRLFLGPQCEEDAELTFLLSAY  
FTLRREASSPNAHDPLQYRDALIGAGRQLDRALRIRRYRKAPAGECAGLLQRLATAGQ  
PGSPALSEDEIVGHANVMFVSSTEPVAISLAWLLLVLSQLPDLRRALRAESAARASSPAS  
PYDAPLLERVINETLRLTPNALMVRATTQAVSLQGIALPARCEIVVCPFLVHREANAF  
RPHAFLPSRWETARPSPEYFPPFGAGGHFCAGRNALSLIGEVLTLLSRFDFVLDIEQF  
IDWRIHIMLPKGDPTLTAPHVDERDTPSPKWRGPVAELFHFAPGLS

>BBQ\_4488|KEGG|CYP116B23|[Burkholderia pseudomallei]bpm|BP

MTTHSASTPPALPAAQCPFRPVSDDAAHAPAGCPASAGAAAFDPFDDAYQQDPPEYVRWA  
REREPVFYSPKLGWVARYDDIKTIFRDNRTFSPSIALEKITPTGPDANAALASYGYAM

GRTL VNEDEPAHMARRRL LIEPFTPDALRAHEPMVRRLAREYVDRFVDDGRADLVDQMLW  
EVPLTVALHFLGVPEADMDTL RAYSIAHTVNTWGRPRPDEQVAVAHAVGQFWQYAGK VLE  
KMREDPSGPGWMQFGIRMQREHPDIVTDSYLHSM MMAGIVAAHETTANATANALKLLLEH  
PRAWRELCD DPALIPNAVDECLRHSGSIVAWRRIATRDATVGGVAIPAGAKLLIVTSSAN  
RDERRFADPDLFDIHRDNPADHLTFGYGSHQCMGKHLARMEMQIFIDELSRRLPHMRLAE  
QRFTYVPNTSFRGPEHLWVEWEPAENPQRRGHDARRCALAVRIGESNARRAGRALRVDSV  
MPVAERVLRLVRLVAPDGAPLPRWSAGAHIDVECGDTGLSRQYSLCGDPAERGVYEIAVLR  
EPASRGGS AWLHERLRPGMRVKIRGPRNHFRLDGHAARAILIAGGIGVTPIGAIAREARA  
RGIDYALHYCGRSRRTMAFVDELAALHGERLRLHVSDEGTRHDFSALDVAAGTQVYACGP  
ARMLDALAACAAHWPAAHALRVEHF AAAAPRVDPRTDQPFLEVELKDSGLTTLVPANRTLLA  
TLRAANVDVQSDCEEGLCGSCEVRVLAGEVDHRDSVLSADERALNTRMMACCSRARHGRL  
VLEL

>AHG37152.1|NCBI|CYP1013A3|[Burkholderia pseudomallei]bpsm|BP

MSKHRQAPGPRGGLVMGNLAAYKRNPITMLRLHQQYGDVARNRLGPFVTHALAHDPDHIQ  
YVLQENHRNYVRGRFYDNFKMFFGDGLLT DGEFWRRHRRVVQPLFHKKQVDAHTAAVGD  
AALALAHRSALPPGKALDVVEEMHLSLRMLGLMVFN TDVSSHAEAVGPAVRFGIEAMM  
PQGNLNDFI PRWAPTRFNRRIAHARRAIDTIVAKI IADHREARCEPSDVISL LLLNARDPD  
TGAPMTQQEVHDEVMTVFLAGHETT GAGLAWALYALAQH PAVLRQLRDELDARLGGRAPT  
VQDFEQLPYLSQVVDEVLRVYPPIWGFTRDLVEDDEIGGYRIPARSSVFMSPYVTHRHPA  
FWRNPDAFDPENFASDAPARHRFVYFPFGGGM RKCIGFQTALLQMRVLVAVVAQHFDLNA  
LPGHPIELGATISLRPVHGIRLIVKPRERQQSHLARVREHESARALRPLGDTATTAGAAC  
PMTAAREPGASAAAALAAVEAGALDAAHRGGAAAARGEPCRRAIRPTAAPLPLAASPAVDA  
PDASARGVPAWRFTWRPVVPVDPVPDEPSPALSGRRIALVNGRGGTAERVAALARTCAKV  
SVFAPAASADHAEAAARVFN EAGPLDGI VDLGLEVPFALDDAGAW EAPMRRTVELLKACY  
GDWAAEDDTSRLFYVALTWMDGQMGYGETAG AQPLGGLWAGLAKTLPQELPNCNVRVLDI  
APDETGRVDRLLVNELYRWGLFEVGYRGGVRYTLHAKRNELPPHAVDARTTLGAGDTVLF  
SGGARGIGLLCARALAERHGCTVIVTGRET PPDGGE PWMALDEPGFKHYGLEQLRAATPE  
HPPKAIRAA LQRLKRRRELRTALDEMAALGLPVHYRVCDVTDRAAVRALCDELGDSL RMV  
IHNAGVDRPVRLIQKRAEDFADTVRTKVLGFANLCDAVRARPRLVQFCNVGSLTGRWGGM  
TGETDYAAANEALARLGLWAARHAFSPACGVKTLVWPTWEGVGMITNFAVTQRYVSPMNV

DEGVRHWLRELATPGSGEVMFMGAVGRAPTPVQIKGFVPIRELPNIGELVTRRHHVGEPV  
RFRPFKRFESRYAIDPAVAPYAHAFRFRNGRAVLPAASLVLEHACAVGDWVMPPTGEPRELS  
EMTNVVLRLDALPDVPAGGAPVELASEAAGYMIGDVWCVDVRCSDARTQAELLSMTLVYR  
PQPEQIGAAFARAPDTPPEPAPLTSAPHAAWNCELLPAGDWSVPDDASAGIVRIGRVPPA  
AVLSLWALPFPLELRLPVNHVEHVLRLVLLAEWGAARADAPAVWRIGGAKLARLPAASADG  
VVEYAAGRFAVL DARGYVLLRIDDARVDGEPAQAALPETGALADPLTA

>BBN\_5106|KEGG|CYP116B23|[Burkholderia pseudomallei]bpsu|BP

MTTHSASTPPALPAAQCPFRPVSDDAAHAPAGCPASAGAAAFDPFDDAYQQDPPEYVRWA  
REREPVFYSPKLGWVVARYDDIKTIFRDNRTFSPSIALEKITPTGPDANAALASYGYAM  
GRTL VNEDEPAHMARRRLLEPFTPDALRAHEPMVRLAREYVDRFVDDGRADLVDQMLW  
EVPLTVALHFLGVPEADMDTLRAYSIAHTVNTWGRPRPDEQVAVAHAVGQFWQYAGKVLE  
KMREDPSGPGWMQFGIRMQREHPDIVTDSYLHSMMMAGIVAAHETTANATANALKLLEH  
PRAWRELCDDPALIPNAVDECLRHSGSIVAWRRIATRDATVGGVAIPAGAKLLIVTSSAN  
RDERRFADPDLFDIHRDNPADHLTFGYGSHQCMGKHLARMEMQIFIDELSRRLPHMRLAE  
QRFTYVPNTSFRGPEHLWVEWEPAENPQRRGHDARRCALAVRIGESNARRAGRALRVDSV  
MPVAERVLRLVRLVAPDGAPLPRWSAGAHIDVECGDTGLSRQYSLCGDPAERGVYEIAVLR  
EPASRGGSAAWLHERLRPGMRVKIRGPRNHFRDLGHAARAILIAGGIGVTPIGAIAREARA  
RGIDYALHYCGRSRRTMAFVDELAALHGERLRLHVSDEGTRHDFSALDVAAGTQVYACGP  
ARMLDALAACAAHWPAAHALRVEHFAAAAAPRVDPRTDQPFLEVELKDSGLTLTPANRTLLA  
TLRAANVDVQSDCEEGLCGSCEVRVLAGEVDHRDSVLSADERALNTRMMACCSRARHGRL  
VLEL

>BBN\_5879|KEGG|CYP1488A1|[Burkholderia pseudomallei]bpsu|BP

MNGLPLSLPRVDSTDSL FADPLAFLARARAQCGDVFLREHGPIFSRASDCSGVIAVFGE  
HRLRQVLTETDTFALPMSAAAKMALPKNLVNLNRGLHSMREPEHGRHKRLLTGTANRALF

DAHRSGMQTDLSRFEMLNGDGRISVVSRMRELTAKLASRLFLGPQCEEDAEFTFLLSAY  
FTLRREASSPNAHDPLQYRDALIGAGRQLDRALRARIRRYRKAPAGECAGLLQRLATAGQ  
PGSPALSEDEIVGHANVMFVSSTEPVAISLAWLLLVLSQLPDLRRALRAESAARASSPAS  
PYDAPLLERVINETLRLTPNALMVRATTQAVSLQGIALPARCEIVVCPFLVHREANAF  
RPHAFLPSRWETARPSPYEYFPFGAGGHFCAGRNLALSLIGEVLTLLSRFDFVLDIEQF  
IDWRIHIMLMPKGDPTLTAHPVDERDTPSPKWRGPVAELFHFAPGLS

>AHG69705.1|NCBI|CYP1013A3|[Burkholderia pseudomallei]bpsu|BP

MSKHRQAPGPRGGLVMGNLAAYKRNPITMLRLHQYGDVARNRLGPFVTHALAHDPDHIQ  
YVLQENHRNYVRGRFYDNFKMFFGDGLLTDDGEFWRRHRRVVQPLFHKKQVDAHTAAVGD  
AALALAHRSALPPGKALDVVEEMHLSLRMLGLMVFNTDVSSHAEAVGPAVRFGIEAMM  
PQGNLNDFI PRWAPTRFNRRIAHARRAIDTIVAKIIADHREARCEPSDVISLLLNARDPD  
TGAPMTQQEVHDEVMTVFLAGHETTGAAGLAWALYALAQHPAVLRQLRDELDARLGGRAPT  
VQDFEQLPYLSQVVDEVLRVYPPFIWGFTRDLVEDDEIGGYRIPARSSVFMSPYVTHRHPA  
FWRNPDAFDPENFASDAPARHRFVYFPFGGMRKCIGFQTALLQMRVLVAVVAQHFDLNA  
LPGHPIELGATISLRPVHGIRLIVKPRERQQSHLARVREHESARALRPLGDTATTAGAAC  
PMTAAREPGASAAALAAVEAGALDAAHRGGAAAAAAGEPCPPRDPAEAPLPLAASPAVD  
ADASARGVPAWRFTWRPVPVDPVPDEPSPALSGRRIALVNGRGGTAERVAALARTCAKV  
SVFAPAASADHAEAAARVFNVEAGPLDGLVDLGLVPPFALDDAGAWAEPMRRTVELLKACY

GDWAAEDDTSRLFYVALTWMDGQMGYGETAGAQPLGGLWAGLAKTLPQELPNCNVRVLDI  
APDETGRVDRLVVNELYRWGLFEVGYRGGVRYTLHAKRNELPPHAVDARTTLGAGDTVLF  
SGGARGIGLLCARALAERHGCTVIVTGRETTPDGGEPPWMALDEPGFKHYGLEQLRAATPE  
HPPKAIRAALQRLKRRRELRTALDEMAALGLPVHYRVCDVTDRAAVRALCDELGDSL RMV  
IHNAGVDRPVRLIQKRAEDFADTVRTKVLGFANLCDAVRARPRLVQFCNVGSLTGRWGGM  
TGETDYAAANEALARLGLWAARHAFSPACGVKTLVWPTWEGVGMITNFAVTQRYVSPMNV  
DEGVRHWLRELATPGSGEVMFMGAVGRAPTVPQIKGFVPIRELPNIGELVTRRHVGE PV  
RFRPFKRFESRYAIDPAVAPYAHAFRFNGRAVL PASLVLEHACAVGDWVMPPTGEPRELS  
EMTNVVLRLDALPDVPAGGAPVELASEAAGYMIGDVWCVDVRCSDARTQAELLSMTLVYR  
PQPEQIGAAFARAPDTTPEPAPLTSAPHAAWN GELL PAGDWSVPDDASAGIVRIGRVPPA  
AVLSLWALPFPLELRLPVNHVEHVLRLVLLAEWGAARADAPAVWRIGGAKLARLPAASADG  
VVEYAAGRFAVL DARGYVLLRIDDARVDGEPAQAALPETGALADPLTA

>BBX\_4173|KEGG|CYP116B23|[Burkholderia pseudomallei]bpsd|BP

MTTHSASTPPALPAAQCPFRPVSDDAAAHPAGCPASAGAAAFDPFDDAYQQDPPEYLRWA  
REREPVFYSPKLGYWVARYDDIKTI FRDNRTFSPSIALEKITPTGPDANAALASYGYAM  
GRTL VNEDEPAHMARRRL LIEPFTP DALRAHEPMVRRLAREYVDRFVDDGRADLVDQMLW  
EVPLTVALHFLGVPEADMDTL RAYSIAHTVNTWGRPRPDEQVAVAHAVGQFWQYAGKVLE  
KMREDPSGPGWMQFGIRMQREHPDIVTDSYLHSM MMAGIVA AHETTANATANALKLLLEH  
PRAWRELCD DPALIPNAVDECLRHSGSIVAWRR TATRDATVGGVAIPAGAKLLIVTSSAN  
RDERRFADPDLFDIHRDNPADHLTFGYGSHQCMGKHLARMEMQIFIDELSRRLPHMRLAE  
QRFTYVPNTSFRGPEHLWVEWEPAENPQRRGHGARRCALAVRIGESNARRAGRALRVDSV  
MPVAERVLRLVRLVAPDGAPLPRWSAGAHIDVECGDTGLSRQYSLCGDPAERGVYEIAVLR  
EPASRGGSAWMHERLRPGMRVKIRGPRNHFRLDGHAARAILIAGGIGITPIGAIAREARA  
RGIDYALHYCGRSRRTMAFVDELAALHGERLRLHVSDEGTRHDFSALDVAAGTQVYACGP



ARMLDALAACAAHWPAAHALRVEHFAAAAAPRVDPRTDQPFLEVELKDSTLTVPANRTLLA  
TLRAANVDVQSDCEEGLCGSCEVRVLAGEVGHRSVLSADERALNTRMMACCSRARHGRL  
VLEL

>BBX\_5024|KEGG|CYP1488A1|[Burkholderia pseudomallei]bpsd|BP

MNGLPLSLPRVDSTDSLFAADPLAFLARARAQCGDVFLREHGPIFSRASDCSGVIAVFGE  
HRLRQVLTETDTFALPMSAAKMALPKNLVNLNRGLHSMREPEHGRHKRLLTGTANRALF  
DAHRSGMQTDLSRCEMLNGDGRISVVSARMRELTAKLASRLFLGPQCEEDAEFLTLLSAY  
FTLRREASSPNAHDPLQYRDALIGAGRQLDRALRARIIRYRKAPAGECAGLLQRLATAGQ  
PGSPALSEDEIVGHANVMFVSSTEPVAISLAWLLLVLSQLPDLRRALRAESAARASSPAS  
PYDAPLLERVINETLRLLTPNALMVRATTQAVSLQGVALPARCEIVVCPFLVHREANAF  
RPHAFLPSRWETARPSPYEYFPFGAGGHFCAGRNLAISLIGEVLTLLSRFDFVLDIEQF  
IDWRIHIMLPKGDPTLTAHPVDERRDTPSPKWRGPVAELFHFAPGLS

>AHK69290.1|NCBI|CYP1013A3|[Burkholderia pseudomallei]bpsd|BP

MSKHRQAPGPRGGLVMGNLAAYKRNPITMLLRHLHQYGDVARNRLGPFVTHALAHDPDHIQ  
YVLQENHRNYVRGRFYDNFKMFFGDGLLTDDGEFWRRHRRVVQPLFHKKQVDAHTAAVGD  
AALALAHRSALPPGKALDVVEEMHLSLRMLGLMVFNDDVSSHAEAVGPAVRFGIEAMM  
PQGNLNDFI PRWAPTRFNRRIAHARRAIDTIVAKIIADHREARCEPSDVISLNNARDPD  
TGAPMTQQEVHDEVMTVFLAGHETTGAGLAWALYALAQHPAVLRQLRDELDARLGGRAPT  
VQDFEQLPYLSQVVDEVLRVYPPIWGFTRDLVEDDEIGGYRIPARSSVFMSPYVTHRHPA  
FWRNPDAFDPENFASDAPARHRFVYFPFGGMRKCIGFQTALLQMRVLVAVVAQHFDLNA  
LPGHPIELGATISLRPVHGIRLIVKPRERQQSHLARVREHESARALRPLGDTATTAGAAC  
PMTAAREPGASAAALAAVEAGALDAAHRGGAAAAAAGEPCPPRDPAEAAPLPLAAAPAPA  
SPAVDADASARGVPAWRFTWRPVVDPVPDEPSPALSGRRIALVNGRGGTAERVAAALAR  
TCAKVSVFAPAASADHAEAAARVFNVEAGPLDGIVDLGLLEAPFALDDAGAWAEMRRTVEL  
LKACYGDWAAEDDTSRLFYVALTWMDGQMGYGETAGAQLGGLWAGLAKTLPQELPNCNV  
RVLDIAPDETGRVDRLVVNELYRWGLFEVGYRGGVRYTLHAKRNELPPHAVDARTTLGAG  
DTVLFSGGARGIGLLCARALAERHGCTVIVTGRETTPDGGEPMALDEPGFKHYGLEQLR

AATPEHPPKAIRAAALQRLKRRRELRTALDEMAALGLPVHYRVCDVTDRAAVRALCDELGD  
SLRMVIHNAAGVDRPVRLIQKRAEDFADTVRTKVLGFANLCDAVRARPRLVQFCNVGSLTG  
RWGGMTGETDYAAANEALARLGLWAARHAFSPACGVKTLVWPTWEGVGMITNFAVTQRYV  
SPMNVDEGVRHWLRELAAPGSGEVMFMGAVGRAPTVPVQIKGFVPIRELPNIGELVTRRHH  
VGEVVRFRPFKRFESRYAIDPAVAPYAHAFRFNGRAVLPAASLVLEHACAVGDWVMPPTGE  
PRELSEMTNVVLRLDALPDVPAGGAPVELASEAAGYMIGDVWCVDVRCSDARTQAELLSM  
TLVYRPQPEQIGAAFARAPDTTPEPAPLTSAPHAAWNCELLPAGDWSVPDDASAGIVRIG  
RVPPAAVLSSLWALPFPLELRLPVNHVEHVLRLVLLAEWGAARADAPAVWRIGGAKLARLPA  
ASADGVVEYAAGRFAVLDAARGYVLLRIDDARVDGEPAQAALPETGALADPLTA

>BP1026B\_II1768|KEGG|CYP116B23|[Burkholderia pseudomallei]bpz|BP

MTTHSASTPPALPAAQCPFRPVSDDAAHAPAGCPASAGAAAFDPFDDAYQQDPPEYVRWA  
REREPVFYSPKLGWVVARYDDIKTIFRDNRTFSPSIALEKITPTGPDANAALASYGYAM  
GRTLNVNEDEPAHMARRRLLEPFTPDALRAHEPMVRLAREYVDRFVDDGRADLVDQMLW  
EVPLTVALHFLGVPEADMDTLRAYSIAHTVNTWGRPRPDEQVAVAHAVGQFWQYAGKVLE  
KMREDPSGPGWMQFGIRMQREHPDIVTDSYLHSMMAAGIVAAHETTANATANALKLLLEH  
PRAWRELCDPALIPNAVDECLRHSGSIVAWRRRTATRDATVGGVAIPAGAKLLIVTSSAN  
RDERRFADPDLFDIHRDNPADHLTFGYGSHQCMGKHLARMEMQIFIDELSRRLPHMRLAE  
QRFTYVPNTSFRGPEHLWVEWAPAENPQRRGHDARRCALAVRIGESNARRAGRALRVDSV  
MPVAERVLRLVRLVAPDGAPLPRWSAGAHIDVECGDTGLSRQYSLCGDPAERGVYEIAVLR  
EPASRGGSAAWLHERLRPGMRVKIRGPRNHFRDLGHAARAILIAGGIGVTPIGAIAREARA  
RGIDYALHYCGRSRRTMAFVDELAALHGERLRLHVSDEGTRHDFSALDVAAGTQVYACGP  
ARMLDALAACAAHWPAAHALRVEHFAAAAPRVDPRTDQPFLEVELKDSGLTLTVPANRTLLA

TLRAANVDVQSDCEEGLCGSCEVRVLAGEVDHRDSVLSADERALNTRMMACCSRARRGRL  
VLEL

>BP1026B\_II2507|KEGG|CYP1013A3|[Burkholderia pseudomallei]bpz|BP

MSKHRQAPGPRGGLVMGNLAAYKRNPITMLRLHQYGDVARNRLGPFVTHALAHDPDHIQ  
YVLQENHRNYVRGRFYDNFKMFFGDGLLTDDGEFWRRHRRVVQPLFHKKQVDAHTAAVGD  
AALALAHRWSALPPGKALDVVEEMMHLSLRMLGLMVFNTDVSSHAEAVGPAVRFGEIEMM  
PQGNLNDFI PRWAPTRFNRRIAHARRAIDTIVAKIIADHREARCEPSDVISLLLNARDPD  
TGAPMTQQEVHDEVMTVFLAGHETT GAGLAWALYALAQH PAVLRQLRDELDARLGGRAPT  
VQDFEQLPYLSQVVDVLRVYPPIWGFTRDLVEDDEIGGYRIPARSSVFMSPPYVTHRHPA  
FWRNPDAFDPENFASDAPARHRFVYFPFGGGMKRCIGFQTALLQMRVLVAVVAQHFDLNA  
LPGHPIELGATISLRPVHGIRLIVKPRERQQSHLARVREHESARALRPLGDTATTAGAAC  
PMTAAREPGASAAALA AVEAGALDAAHRGGVAAAAAGEPCPPRDPAEAAPLPLAASPAPA  
SPAVDADASARGVPAWRFTWRPVPVDPVPDEPSPALSGRRIALVNGRGGTAERVA AALAR  
TCAKVSVFAPAASADHAEAAARVFN EAGPLDGI VDLGLEAPFALDDAGAW EAPMRRTVEL  
LKACYGDWVAEDDTSRLFYVALTWMDGQM GYGETAGAQPLGGLWAGLAKTLPQELPNCNV  
RVLDIAPDETGRVDRLVVNELYRWGLFEVGYRGGVRYTLHAKRNE LPPHAVDARTTLGAG  
DTVLFSGGARGIGLLCARALAERHGCTVIVTGRET PPDGGEPWMALDEPGFKHYGLEQLR  
AATPEHPPKAIRAALQRLKRRRELRTALDEMAALGLPVHYRVCDVTDRAAVRALCDELGD  
SLRMVIHNAGVDRPVRLIQKRAEDFADTVRTKVLGFANLCDAVRARPRLVQFCNVGSLTG  
RWGGMTGETDYAAANEALARLGLWAARHAFSPACGVKTLVWPTWEGVGMITNFAVTQRYV  
SPMNVDEGVRHWLRELATPGSGEVMFMGAVGRAPT PVQIKGFVPIRELPNIGELVTRRHH  
VGEPVRFRFPKRFESRYAIDPAVAPYAHAFRFNGRAVL PASLVLEHACAVGDWVMPPTGE  
PRELSEMTNVVLRLDALPDVPAGGAPVELASEAAGYMIGDVWCVDVRCSDARTQAELLSM  
TLVYRPQPEQIGAAFARAPDTTPEPAPLTSAPHAAWN GELLPAGDWSVPDDASAGIVRIG  
RVPPAAVLSLWALPFPLELRLPVNHVEHVLRVLLAEWGAARADAPAVWRIGGAKLARLPA  
ASADGVVEYAAGRFAVL DARGYVLLRIDDARVDGEPAQAALPETGALADPLTA

>BP1026B\_II0024|KEGG|CYP1488A1|[Burkholderia pseudomallei]bpz|BP

MSAAAKMALPKNLVNLNRGLHSMREPEHGRQKRLLTGTANRALFDAHRSGMQTDLSRFCE  
MLNGDGRI SVVSRMRELTAKLASRLFLGPQCEEDAELTFLLSAYFTLRREASSPNAHDPL  
QYRDALIGAGRQLDRALRARIRRYRKAPAGECAGLLQRLATAGQPGSPALSEDEIVGHAN  
VMFVSSTEPVAISLAWLLLVLSQLPDLRRALRAESAARASSPASPCGAPLLERVINETLR  
LLTPNALMVRATTQAVSLQGVALPARCEIVVCPFLVHREANAFARPHAFSPSRWETARPS  
PYEYFPFGAGGHFCAGRNLALSLIGEVLTLLSRFDFVLDIEQFIDWRIHIMLMPKGDPT  
LTAHPVDERRDTPSPKWRGPVAELFHFAPGLS

>BPC006\_II0029|KEGG|CYP1488A1|[Burkholderia pseudomallei]bpq|BP

MNGLPLSLPRVDSTDSL FADPLAFLARARAQCGDVFLREHGPIFSRASDCSGVIAVFGE  
HRLRQVLTETDTFALPMSAAAKMALPKNLVNLNRGLHSMREPEHGRHKRLLTGTANRALF  
DAHRSGMQTDLSRFCEMLNGDGRI SVVSRMRELTAKLASRLFLGPQCEEDAELTFLLSAY  
FTLRREASSPNAHDPLQYRDALIGAGRQLDRALRARIRRYRKAPAGECAGLLQRLATAGQ  
PGSPALSEDEIVGHANVMFVSSTEPVAISLAWLLLVLSQLPDLRRALRAESAARASSPAS  
PYDAPLLERVINETLRLLTPNALMVRATTQAVSLQGVALPARCEIVVCPFLVHREANAFAR  
PHAFPLSRWETARPSPYEYFPFGAGGHFCAGRNLALSLIGEVLTLLSRFDFVLDIEQF  
IDWRIHIMLMPKGDPTLTAHPVDERRDTPSPKWRGPVAELFHFAPGLS

>BPC006\_II2219|KEGG|CYP116B23|[Burkholderia pseudomallei]bpq|BP

MTTHSASTPPALPAAQCPFRPVSDDAAAHPAGCPASAGAAAFDPFDDAYQQDPPEYVRWA  
REREPVFYSPKLG YWV VARYDDIKTIFRDNRTFSPSIALEKITPTGPDANAALASYGYAM  
GRTL VNEDEPAHMARRRL LIEPFTP DALRAHEPMVRRLAREYVDRFVDDGRADLVDQMLW  
EVPLTVALHFLGVPEADMDTLRAYSIAHTVNTWGRPRPDEQVAVAHAVGQFWQYAGK VLE  
QMREDPSGPGWMQFGIRMQREHPDIVTDSYLHSM MMAGIVA AHETTANATANALKLLLEH  
PRAWRELCD DPALIPNAVDECLRHSGSIVAWRRIATR DATVGGVAIPAGAKLLIVTSSAN  
RDERRFADPDLFDIHRDNPADHLTFGYGSHQCMGKHLARMEMQIFIDELSRRLPHMRLAE  
QRFTYVPNTSFRGPEHLWVEWAPAENPQRRGHGARRCALAVRIDESNARRAGRALRVDSV  
MPVAERVLRLVRLVAPDGAPLPRWSAGAHIDVECGDTGLSRQYSLCGDPAERGVYEIAVLR  
EPASRGGS AWLHERLRPGMRVKIRGPRNHFRLDGHAARAILIAGGIGITPIGAIAREARA  
RGIDYALHYCGRSRRTMAFVDELAALHGERLRLHVSDEGTRHDFSALDVAAGTQVYACGP

ARMLDALAACAAHWPAAHALRVEHFAAAAPRVDPRTDQPFLEVELKDSGLTLTVPANRTLLA  
TLRAANVDVQSDCEEGLCGSCEVRVLAGEVDHRDSVLSADERALNTRMMACCSRARHGRL  
VLEL

>BPC006\_II3092|KEGG|CYP1013A3|[Burkholderia pseudomallei]bpq|BP

MSKHRQAPGPRGGLVMGNLAAYKRNPITMLLRLHQQYGDVARNRLGPFVTHALAHDPDHIQ  
YVLQENHRNYVRGRFYDNFKMFFGDGLLTDDGEFWRRHRRVVQPLFHKQVDAHTAAVGD  
AALALAHRSALPPGKALDVVEEMHLSRLMLGLMVFN TDVSSHAEAVGPAVRFGIEAMM  
PQGNLNDFI PRWAPTRFNRRIAHARRAIDTIVAKIIADHREARCEPSDVISLLLNARDPD  
TGAPMTQQEVHDEVMTVFLAGHETTGAGLAWALYALAQH PAVLRQLRDELDARLGGRAPT  
VQDFEQLPYLSQVVDEVLRVYPPIWGFTRDLVEDDEIGGYRIPARSSVFMSPYVTHRHPA  
FWRNPDAFDPENFASDAPARHRFVYFPFGGMRKCIGFQTALLQMRVLVAVVAQHFDLNA  
LPGHPIELGATISLRPVHGIRLIVKPRERQQSHLARVREHESARALRPLGDTATTAGAAC  
PMTAAREPGASAAALA AVEAGALDAAHRGGAAAAAAGEPCPPRDPAEAAPLPLAASPAPA  
SPAVDADASARGVPAWRFTWRPVPVDPVPDEPSPALSGRRIALVNGRGGTAERVA AALAR  
TCAKVSVFAPAASADHAEAAARVFN EAGPLDGI VDLGLEAPFALDDAGAW EAPMRRTVEL  
LKACYGDWAAEDDTSRLFYVALTWMDGQMGYGETAGAQPLGGLWAGLAKTLPQELPNCNV  
RVLDIAPDETGRVDRLVVNELYRWGLFEVGYRGGVRYTLHAKRNELPPHAVDARTTLGAG  
DTVLFSGGARGIGLLCARALAERHGCTVIVTGRET PPDGGEPPMALDEPGFKHYGLEQLR  
AATPEHPPKAIRAAALQRLKRRRELRTALDEMAALGLPVHYRVCDVTDRAAVRALCDELGD  
SLRMVIHNAGVDRPVRLIQKRAEDFADTVRTKVLGFANLCDAVRARPRLVQFCNVGSLTG  
RWGGMTGETDYAAANEALARLGLWAARHAFSPACGVKTLVWPTWEGVGMITNFAVTQRYV  
SPMNVDEGVRHWLRELAAPGSGEVMFMGAVGRAPTPVQIKGFVPIRELPNIGELVTRRHH  
VGEPVRFRFPFKRFESRYAIDPAVAPYAHAFRFNGRAVL PASLVLEHACAVGDWVMPPTGE  
PRELSEMTNVVLRLDALPDVPAGGAPVELASEAAGYMIGDVWCVDVRCSDARTQAELLSM  
TLVYRPQPEQIGAAFARAPDTTPEPAPLTSAPHAAWN GELLPAGDWSVPDDASAGIVRIG  
RVPPAAVLSLWALPFPLELRLPVNHVEHVLRVLLAEWGAARADAPAVWRIGGAKLARLPA  
ASADGVVEYAAGRFAVL DARGYVLLRIDDARVDGEPAQAALPETGALADPLTA

>BBK\_4312|KEGG|CYP116B23|[Burkholderia pseudomallei]bpb|BP

MTTHSASTPPALPAAQC PFPRVSDDA AHPAGCPASAGAAAFDPFDDAYQQDPPEYVRWA

REREPVFYSPKLGWVWVARYDDIKTIFRDNRTFSPSIALEKITPTGPDANAALASYGYAM  
GRTLUNEDEPAHMARRRLLEPFTPDALRAHEPMVRRRLAREYVDRFVDDGRADLVDQMLW  
EVPLTVALHFLGVPEADMDTLRAYSIAHTVNTWGRPRPDEQVAVAHAVGQFWQYAGKVL  
KMREDPSGPGWMQFGIRMQREHPDIVTDSYLHSMMMAGIVAAHETTANATANALKLLEH  
PRAWRELCDDPALIPNAVDECLRHSGSIVAWRRTATRDATVGGVAIPAGAKLLIVTSSAN  
RDERRFADPDLFDIHRDNPADHLTFGYGSHQCMGKHLARMEMQIFIDELSRRLPHMRLAE  
QRFTYVPNTSFRGPEHLWVEWEPAENPQRRGHDARRCALAVRIGESNARRAGRALRVDSV  
MPVAERVLRLVRLVAPDGAPLPRWSAGAHIDVECGDTGLSRQYSLCGDPAERGVEIAVLR  
EPASRGGSAAWMHERLRPGMRVKIRGPRNHFRDLGHAARAILIAGGIGITPIGAIAREARA  
RGIDYALHYCGRSRRTMAFVDELAALHGERLRLHVSDEGTRHDFSALDVAAGTQVYACGP  
ARMLDALAACAAHWPAAHALRVEHFAAAAPRVDPRTDQPFLEVELKDSGLTLTVPANRTLLA  
TLRAANVDVQSDCEEGLCGSCEVRVLAGEVDHRDSVLSADERALNTRMMACCSRARHGRL  
VLEL

>BBK\_5113|KEGG|CYP1013A3|[Burkholderia pseudomallei]bpk|BP

MSKHRQAPGPRGGLVMGNLAAYKRNPITMLRLHQQYGDVARNRLGPFVTHALAHDPDHIQ  
YVLQENHRNYVRGRFYDNFKMFFGDGLLTDDGEFWRRHRRVVQPLFHKKQVDAHTAAVGD  
AALALAHWSALPPGKALDVVEEMMHLSLRMLGLMVFNNTDVSSHAEAVGPAVRFGIEAMM  
PQGNLNDFIPRWAPTRFNRQIAHARRAIDTIVAKIIADHREARCEPSDVISLLLNARDPD  
TGAPMTQQEVHDEVMTVFLAGHETTGAGLAWALYALAQHPAVLRRLRDELDA RLGGRAPT  
VQDFEQLPYLSQVVDEVLRVYPPIWGFTRD LVEDDEIGGYRIPARSSVFMSPYVTHRHPA  
FWRNPDAFDPENFASDAPARHRFVYFPFGGMRKCIGFQTALLQMRVLVAVVAQHFDLNA  
LPGHPIELGATISLRPVHGIRLIVKPRERQQSHLARVREHESARALRPLGDTATTAGAAC  
PMTAAREPGASAAALAAVEAGALDAAHRGGAAAAAAGEPCPPRPAAEAPLPLAASPAPA  
SPAVDADASARGVPAWRFTWRPVPVDPVPDEPSPALSGRRIALVNGRGGTAERVAALAR  
TCAKVSVFAPAASADHAEAAARVFN EAGPLDGI VDLGLEAPFALDDAGAW EAPMRRTVEL  
LKACYGDWAAEDDTSRLFYALTWMDGQMGYGETAGAQLGGLWPGSRRCRRSCRTATC  
ACSTS RPTRAASIGSSSTSSIAGGCSKSAIAAACATRCTR SATNCR RTPSTRAPRSARA  
TPCCSRAARAASACCARARSPSVMAAR

>BBK\_5162|KEGG|CYP1488A1|[Burkholderia pseudomallei]bpb|BP

MNGLPLSLPRVDSTDSL FADPLAFLARARAQCGDV FVLREHGPIFSRASDCSGVIAVFGE  
HRLRQVLTETDTFALPMSAAAKMALPKNLVNLNRGLHSMREPEHGRHKRLLTGTANRALF  
DAHRSGMQTDLSRFCEMLNGDGRISVVSRMRELTAKLASRLFLGPQCEEDAELTFLLSAY  
FTLRREASSPNAHDPLQYRDALIGAGRQLDRALRARIRRYRKAPAGECAGLLQRLATAGQ  
PGSPALSEDEIVGHANVMFVSSTEPVAISLAWLLLVLSQLPDLRRALRAESAARASSPAS  
PYDAPLLERVINETLRLLT PNALMVRATMQAVSLQGIALPARCEIVVCPFLVHREANAF  
RPHAFLPSRWETARPSPYEYFPFGAGGHFCAGRNLALSLIGEVLTLLSRFDFVLDIEQF  
IDWRIHIMLMPKGDPTLT AHPVDERRDTPSPKWRGPVAELFHFAPGLS

>DR55\_5348|KEGG|CYP1488A1|[Burkholderia pseudomallei]bpsh|BP

MNGLPLSLPRVDSTDSL FADPLAFLARARAQCGDV FVLREHGPIFSRASDCSGVIAVFGE  
HRLRQVLTETDTFALPMSAAAKMALPKNLVNLNRGLHSMREPEHGRHKRLLTGTANRALF  
DAHRSGMQTDLSRFCEMLNGDGRISVVSRMRELTAKLASRLFLGPQCEEDAELTFLLSAY  
FTLRREASSPNAHDPLQYRDALIGAGRQLDRALRARIRRYRKAPAGECAGLLQRLATAGQ  
PGSPALSEDEIVGHANVMFVSSTEPVAISLAWLLLVLSQLPDLRRALRAESAARASSPAS  
PCGAPLLERVINETLRLLT PNALMVRATTQAASLQGVVALPARCEIVVCPFLVHREANAF  
RPHAFLPSRWETARPSPYEYFPFGAGGHFCAGRNLALSLIGEVLTLLSRFDFVLDIEQF  
IDWRIHIMLMPKGDPTLT AHPVDERRDTPSPKWRGPVAELFHFAPGLS

>AIP54282.1|NCBI|CYP1013A3|[Burkholderia pseudomallei]bpsh|BP

MSKHRQAPGPRGGLVMGNLAAYKRNPITMLLR LHQQYGDVARNRLGPFVTHALAHDPDHIQ  
YVLQENHRNYVRGRFYDNFKMFFGDGLLT DGEFWRRHRRVVQPLFHKKQVDAHTAAVGD  
AALALAHRSALPPGKALDVVEEMHLSRLMLGLMVFN TDVSSHAEAVGPAVRFIEAMM  
PQGNLNDFI PRWAPTRFNRRIAHARRAIDTIVAKI IADHREARCEPSDVISLLLNARDPD  
TGAPMTQQEVHDEVMTVFLAGHETT GAGLAWALYALAQH PAVLRQLRDELDARLGGRAPT  
VQDFEQLPYLSQVVDEVLRVYPPIWGFTRDLVEDDEIGGYRIPARSSVFMSPYVTHRHPA

FWRNPDAFDPENFASDAPARHRFVYFPFGGMRKCIGFQTALLQMRVLVAVVAQHFDLNA  
LPGHPIELGATISLRPVHGIRLIVKPRERQQSHLARVREHESARALRPLGDTATTAGAAC  
PMTAAREPGASAAALA AVEAGALDAAHRGGAAAAAAGEPCPPRDPAEAAPLPLAASPAPA  
SPAVDADASARGVPAWRFTWRFPVPVDFVPDEPSPALSGRRIALVNGRGGTAERVA AALAR  
TCAKVS VFAPAASADHAEAAARV FVNEAGPLDGI VDLGLEAPFALDDAGAW EAPMRRTVEL  
LKACYGDWAAEDDTSRLFYVALTWMDGQM GYGETAGAQPLGGLWAGLAKTLPQELPNCNV  
RVLDIAPDETGRVDRLVVNELYRWGLFEVGYRGGVRYTLHAKRNELPPHAVDARTTLGAG  
DTVLFSGGARGIGLLCARALAERHGCTVIVTGRET PPDGGEPWMALDEPGFKHYGLEQLR  
AATPEHPPKAIRAA LQRLKRRRELKTALDEMAALGLPVHYRVCDVTDRAAVRALCDELGD  
SLRMVIHNAGVDRPVRLIQKRAEDFADTVRTKVLGFANLCDAVRAQPRLVQFCNVGSLTG  
RWGGMTGETDYAAANEALARLGLWAARHAFSPACGVKTLVWPTWEGVGMITNFAVTQRYV  
SPMNVDEGVRHWLRELATPGSGEVMFMGAVGRAPT PVQIKGFVPIRELPNIGELVTRRH  
VGEPVRFRFPKRFESRYAIDPAVAPYAHAFRFNGRAVL PASLVLEHACAVGDWVMPPTGE  
PRELSEMTNVVLRLDALPDVPAGGAPVELASEAAGYMIGDVWCVDVRCSDARTQAELLSM  
TLVYRPQPEQIGAAFARAPDTTPEPAPLTSAPHA AWWNGELLPAGDWSVPDDASAGIVRIG  
RVPPAAVLSLWALPFPLELRLPVNHVEHVLRVLLAEWGAARADAPAVWRIGGAKLARLPA  
ASADGVVEYAAGRFAVL DARGYVLLRIDDARVDGEPAQAALPETGALADPLTA

>BBU\_3609|KEGG|CYP1488A1|[Burkholderia pseudomallei]bpsa|BP

MNGLPLSLPRVDSTDSL FADPLAFLARARAQCGDV FVLREHGPIFSRASDCSGVIAVFGE  
HRLRQVLTETDTFALPMSAAKMALPKNLVNLNRGLHSMREPEHGRHKRLLTGTANRALF  
DAHRSGMQTDLSRFCEMLNGDGRI SVVSRMRELTAKLASRLFLGPQCEEDAELTFLLSAY  
FTLRREASSPNAHDPLQYRDALIGAGRQLDRALRARIRRYRKAPAGECAGLLQRLATAGQ  
PGSPALSEDEIVGHANVMFVSSTEPVAISLAWLLLVLSQLPDLRRALRAESAARASSPAS  
PYDAPLLERVINETLRL LTPNALMVRATTQAVSLQGIALPARCEIVVCPFLVHREANAF  
RPHAFLPSRWETARPSPYEYFPFGAGGHFCAGRNLA LSLIGEV LSTLLSRFDFVLDIEQF  
IDWRIHIMLPKGDPTLMAHPVDERDTPSPKWRGPVAELFHFAPGLS



>AIS91404.1|NCBI|CYP1013A3|[Burkholderia pseudomallei]bpsa|BP

MSKHRQAPGPRGGLVMGNLAAYKRNPIITMLRLHQQYGDVARNRLGPFVTHALAHDPDHIQ  
YVLQENHRNYVRGRFYDNFKMFFGDGLLTDDGEFWRRHRRVVQPLFHKKQVDAHTAAVGD  
AALALAHRSALPPGKALDVVEEMMHLSLRMLGLMVFNNTDVSSHAEAVGPAVRFGIEAMM  
PQGNLNDFI PRWAPTRFNRRIAHARRAIDTIVAKIIADHREARCEPSDVISLLLNARDPD  
TGAPMTQQEVHDEVMTVFLAGHETTGAGLAWALYALAQHPAVLRQLRDELDARLGGRAPT  
VQDFEQLPYLSQVVDEVLRVYPPIWGFTRDLVEDDEIGGYRIPARSSVFMSPYVTHRHPA  
FWRNPDAFDPENFASDAPARHFRVYFPFGGMRKCIGFQTALLQMRVLVAVVAQHFDLNA  
LPGHPIELGATISLRPVHGIRLIVKPRERQQSHLARVREHESARALRPLGDTATTAGAAC  
PMTAAREPGASAAALAAVEAGALDAAHRGGAAAAAAGEPCPPRDPAEAAPLPLAASPAPA  
SPAVDADASARGVPAWRFTWRPVPVDPVPDEPSPALSGRRIALVNGRGGTAERVAALAR  
TCAKVSVFAPAASADHAEAARVVFVNEAGPLDGI VDLGLEAPFALDDAGAW EAPMRRTVEL  
LKACYGDWAAEDDTSRLFYVALTWMDGQMGYGETAGAQPLGGLWAGLAKTLPQELPNCNV  
RVLDIAPDETGRVDRLVVNELYRWGLFEVGYRGGVRYTLHAKRNELPPHAVDARTTLGAG  
DTVLFSGGARGIGLLCARALAERHGCTVIVTGRETTPDGGEPMALDEPGFKHYGLEQLR  
AATPEHPPKAIRAALQRLKRRRELKTALDEMAALGLPVHYRVCDVTDRAAVRALCDELGD  
SLRMVIHNAGVDRPVRLIQKRAEDFADTVRTKVLGFANLCDAVRAQPRLVQFCNVGSLTG  
RWGGMTGETDYAAANEALARLGLWAARHAFSPACGVKTLVWPTWEGVGMITNFAVTQRYV  
SPMNVDEGVRHWLRELAAPGSGEVMFMGAVGRAPT PVQIKGFVPIRELPNIGELVTRRHH  
VGEPVRFRPFKRFE SRYAIDPAVAPYAHAFR FNGRAVL PASLVLEHACAVGDWVMPPTGE  
PRELSEMTNVVLRLDALPDVPAGGAPVELASEAAGYMIGDVWCVDVRCSDARTQAELLSM  
TLVYRPQPEQIGAAFARAPDTTPEPAPLTSAPHAAWN GELLPAGDWSVPDDASAGIVRIG  
RVPPAAVLSLWALPFPLELRLPVNHVEHVLRVLLAEWGGAARADAPAVWRIGGAKLARLPA  
ASADGVVEYAAGRFAVL DARGYVLLRIDDARVDGEPAQAALPETGALADPLTA

>X996\_5118|KEGG|CYP1488A1|[Burkholderia pseudomallei]bpso|BP

MNGLPLSLPRVDSTDSLFAFLARARAQCGDVFLREHGPIFSRASDCSGVIAVFGE  
HRLRQVLTETDTFALPMSAAKMALPKNLVNLNRGLHSMREPEHGRHKRLTGTANRALF  
DAHRSGMQTDLSRFCEMLNGDGRI SVVSRMRELTAKLASRLFLGPQCEEDAELTFLLSAY  
FTLRREASSPNAHDPLQYRDALIGAGRQLDRALRARIRRYRKAPAGECAGLLQRLATAGQ  
PGSPALSEDEIVGHANVMFVSSSTEPVAISLAWLLLVLSQLPDLRRVLRAESAARASSPAS  
PYDAPLLERVINETLRLTPNALMVRATTQAVSLQGVALPARCEIVVCPFLVHREANAF  
RPHAFLPSRWETARPSPYEYFFPGAGGHFCAGRNLALSLIGEVLTLLSRFDFVLDIEQF  
IDWRIHIMLPKGDPTLMAHPVDERDTPSPKWRGPVAELFHFAPGLS

>AIV93005.1|NCBI|CYP1013A3|[Burkholderia pseudomallei]bpso|BP

MSKHRQAPGPRGGLVMGNLAAYKRNPITMLRLHQYGDVARNRLGPFVTHALAHDPDHIQ  
YVLQENHRNYVRGRFYDNFKMFFGDGLLTDDGEFWRRHRRVVQPLFHKKQVDAHTAAVGD  
AALALAHRSALPPGKALDVVEEMHLSLRMLGLMVFNTDVSSHAEAVGPAVRFGIEAMM

PQGNLNDFI PRWAPTRFNRRIAHARRAIDTIVAKIIADHREARCEPSDVISL LLLNARDPD  
TGAPMTQQEVHDEVMTVFLAGHETTGA GLAWALYALAQH PAVLRQLRDELDARLGGRAPT  
VQDFEQLPYLSQVVDEVLRVYPP I WGFTRDLVEDDEIGGYRI PARSSVFMSPYVTHRHPA  
FWRNPDAFDPENFASDAPARHRFVYFPFGGMRKCIGFQTALLQMRVLVAVVAQHFDLNA  
LPGHPIELGATISLRPVHGIRLIVKPRERQQSHLARVREHESARALRPLGDTATTAGAAC  
PMTAAREPGASAAALAAVEAGALDAAHRGGVAAAAAGEPCPPRPDAEAAPLPLAAAPAPA  
SPAVDADASARGVPAWRFTWRPVVPDVPDEPSPALSGRRIALVNGRGGTAERVA AALAR  
TCAKVS VFAPAASADHAEAAARV FVNEAGPLDGIVDLGLEAPFALDDAGAW EAPMRRTVEL  
LKACYGDWAAEDDTSRLFYVALTWMDGQMGYGETAGAQLGGLWAGLAKTLPQELPNCNV  
RVLDIAPDETGRVDRLVVNELYRWGLFEVGYRGGVRYTLHAKRNELPPHAVDARTTLGAG  
DTVLFSGGARGIGLLCARSLAERHGCTVIVTGRET PPDGGE PWMALDEPGFKHYGLEQLR  
AATPEHPPKAIRAAALQRLKRRRELRTALDEMAALGLPVHYRVCDVTDRAAVRALCDELGD  
SLRMV IHNAGVDRPVRLIQKRAEDFADTVRTKVLGFANLCDAVRARPRLVQFCNVGSLTG  
RWGGMTGETDYAAANEALARLGLWAARHAFSPACGVKTLVWPTWEGVGMITNFAVTQRYV  
SPMNVDEGVRHWLRELAAPGSGEVMFMGAVGRAPT PVQIKGFVPIRELPNIGELVTRRHH  
VGEPVRFRFPKRFESRYAIDPAVAPYAHAFR FNGRAVL PASLVLEHACAVGDWVMPPTGE  
PRELSEMTNVVLRLDALPDVPAGGAPVELASEAAGYMIGDVWCVDVRCSDARTQAELLSM  
TLVYRPQPEQIGAAFARAPDTTPEPAPLTSAPHA AWNGELL PAGDWSVPDDASAGIVRIG  
RVPPAAVLSLWALFPFLELRLPVNHVEHVLRVLLAEWGAA RADAPAVWRIGGAKLARLPA  
ASADGVVEYAAGRFAVL DARGYVLLRIDDARVDGEPAQAALPETGALADPLTA

>X994\_4668|KEGG|CYP1488A1|[Burkholderia pseudomallei]but|BP

MNGLPLSLPRVDSTDSL FADPLAFLARARAQCGDV FVLREHGPIFSRASDCSGVIAVFGE  
HRLRQVLTETDTFALPMSAAKMALPKNLVNLNRGLHSMREPEHGRHKRLLTGTANRALF  
DAHRSGMQTDLSRFCEMLNGDGRISVVS RMRELTAKLASRLFLGPQCEEDAELTFLLSAY

FTLRREASSPNAHDPLQYRDALIGAGRQLDRALRARIRRYRKAPAGECAGLLQRLATAGQ  
PGSPALSEDEIVGHANVMFVSSSTEPVAISLAWLLLVLSQLPDLRRALRAESAARASSPAS  
PYDAPLLERVINETLRLTPNALMVRATTQAVSLQGVALPARCEIVVCPFLVHREANAF  
HPHAFSPSRWETARPSPYEYFFPGAGGHFCAGRNLALSLIGEVLSTLLSRFDFVLDIEQF  
IDWRIHIMLMPKGDPTLTAHPVDERRDTSPSPKWRGPVAELFHFAPGLS

>AIV75465.1|NCBI|CYP1013A3|[Burkholderia pseudomallei]but|BP

MSKHRQAPGPRGGLVMGNLAAYKRNPITMLLRLHQQYGDVARNRLGPFVTHALAHDPDHIQ  
YVLQENHRNYVRGRFYDNFKMFFGDGLLTDDGEFWRRHRRVVQPLFHKKQVDAHTAAVGD  
AALALAHRSALPPGKALDVVEEMHLSLRMLGLMVFNTDVSSHAEAVGPAVRFGIEAMM  
PQGNLNDFIPRWAPTRFNRRIAHARRAIDTIVAKIIADHREARCEPSDVISLLLNARDPD  
TGAPMTQQEVHDEVMTVFLAGHETTGAGLAWALYALAQHPAVLRQLRDELDARLGGRAPT  
VQDFEQLPYLSQVVDEVLRVYPPIWGFTRDLVEDDEIGGYRIPARSSVFMSPYVTHRHPA  
FWRNPDAFDPENFASDAPARHRFVYFFPGGMRKCIGFQTALLQMRVLVAVVAQHFDLNA  
LPGHPIELGATISLRPVHGIRLIVKPRERQQSHLARVREHESARALRPLGDTATTAGAAC  
PMTAAREPGASAAALA AVEAGALDAAHRGGAAAAAAGEPCPPRDPAEAAPLPLAAAPAPA  
SPAVDADASARGVPAWRFTWRPVPVDPVPDEPSPALSGRRIALVNGRGGTAERVAALAR  
TCAKVSVFAPAASADHAEAAARVFVNEAGPLDGIVDLGLEAPFALDDAGAWAEPMRRTVEL  
LKACYGDWAAEDDTSRLFYVALTWMDGQMGYGETAGAQLGGLWAGLAKTLPQELPNCNV  
RVLDIAPDETGRVDRLVVNELYRWGLFEVGYRGGVRYTLHAKRNELPPHAVDARTTLGAG  
DTVLFSGGARGIGLLCARALAERHGCTVIVTGRETTPDGGEPWMALDEPGFKHYGLEQLR

AATPEHPPKAIRAAALQRLKRRRELRTALDEMAALGLPVHYRVCDVTDRAAVRALCDELGD  
SLRMVIHNAGVDRPVRLIQKRAEDFVDTVRTKVLGFANLCDAVRARPRLVQFCNVGSLTG  
RWGGMTGETDYAAANEALARLGLWAARHAFSPACGVKTLVWPTWEGVGMITNFAVTQRYV  
SPMNVDEGVRHWLRELAAPGSGEVMFMGAVGRAPTPVQIKGFVPIRELPNIGELVTRRH  
VGEPVRFRPFKRFESEYAIIDPAVAPYAHAFRFRNGRAVLPAASLVLEHACAVGDWVMPPTGE  
PRELSEMTNVVLRDLALPDVPAGGAPVELASEAAGYMIGDVWCVDVRCSDARTQAELLSM  
TLVYRPQPEQIGAAFARAPDTTPEPAPLTSAPHAAWNCELLPAGDWSVPDDASAGIVRIG  
RVPPAAVLSLWALPFPLELRLPVNHVEHVLRLVLLAEWGAARADAPAVWRIGGAKLARLPA  
ASADGVVEYAAGRFAVLDAARGYVLLRIDDARVDGEPAQAALPETGALADPLTA

>BTH\_II0026|KEGG|CYP1488A2|[Burkholderia thailandensis]bte|BP

MNGLPPSLPRVDSTESLFAEPLAFLAQARSRHGDVFMREHGPIFSRASDCSGVIAVFGE  
HRLRQILTDIDNFALPMSAAAKMALPKNLVNLNRGLHSMREPEHGRHKRLLTGTINRELF  
DAHRFEIRAALNRFCEMLKVDRRISVVSARMRELTVEMASHIFLGAQCQEDDELAFLLSAY  
FTLRREASSLNARDPLLYRDELIGVGQQLDRTLRLRIRRYRKRKRPVDARAGLLQRLATAGP  
PGSPALSEDEIVGHANVMFVSSTEPVAMSLTWLLLVLSQLPDLRRALRAEIADRASMPAS  
TNGASWLENNVNETLRLTPNALMVRATTRAVALQGVLPARCEIVVCPFLAHREAKPFP  
DPHAFSPSRWETARPSPEYFPPFGAGGHFCAGRNLALESLIREVLSTLLSRFDFVLDGEQS  
IDWRIHIMLMPKGDPALIAHPVDERGDTSPKWRGPITDLFHFAPGLS

>BTH\_II0434|KEGG|CYP212A12|[Burkholderia thailandensis]bte|BP

MSRDLPGTLAAWQKAYGDIVHLRIWPEHDVVVADPQLARALLVTHHDALIRWERGIRVLS  
QVHGHSVLTAEGEAWRTRRHVLPNFSKAVQGFSPITVKAATRAFAQWPREDADWHIES  
ALTMLTMDVILQMVFSSTLGEDVRVAEQAIRVASAANAIFYWPTSMPDWMPWKREKRQA  
LRTLKDLIERHLQRRLLKLACDAWPDDLLSCLLQSREDASALSLQNVRECMITIFLAGHET  
TAATLVWWAWCMASNPEAQRVARDEVQRVLQGNAPVAETLPELGYLVQTIKETLRRYPVA  
PLLISSRRATRAIQLGDWALPARTLFMIPAHLMHHDARWFPDPEAFRPERFAPDAPEVPRG  
AYIPFGAGPRVCLGQHLAMAEMTVIAAMLLQRFVLSAPDGSAPHPVNLNVTLRPAQPMHL

AITQVDPRIA

>BTH\_II0725|KEGG|CYP116B128|[Burkholderia thailandensis]bte|BP

MTHSASTPPASPAAQCPLHPVSDDAAAHAPAGCPASAGAAAFDPFDDAYQQDPPEYVRWAR  
EQEPVFYSPKLGYWIVTRYDDIKAIFRDNRTFSPSIALEKITPTGPDANAVLASYGAMN  
RTLVDNEDEPAHMARRLLIEPFTPDALRAHEPMVRRLAREYVDRFVDDGRADLVDQMLWE  
VPLTVALHFLGVPEEDMDTLRKYSIAHTVNTWGRPRPDEQVAVAHAVGQFWRYAGKVLEK  
MREDPSGPGWMQFGIRMQREHPDIVTDSYLHSMMAAGIVAAHETTANATANALKLLLQHP  
RAWRELCDDPSLIPNAVDECLRHNGSIAAWRIATCDATVGGVAIPAGAKLLIVTSSANR  
DERRFADADLFDIHRDDCAEHLTFGYGAHQCMGKHLARMEMQIFIDELTRRLPHMRLAEQ  
RFTYVPNTSFRGPEHLWVEWDPAANPERRRADARRPALAVRIGESNARGAGRALRVDSMT  
PVAERVLRLVRLVAPGGEPLPRWSAGAHIDIECGDTGLSRQYSLCGDPAERGAYEIAVLRE  
PASRGGSAMWHERLRPGMRVKIRGPRNHFRDLAHSRAILIAAGGIGITPIGAIRQARAG  
GIDYTLHYCGRSRRTMAFVDELAALHGERLRLHVSDEGTRADFSALDVAPGTQVYACGPA  
RMLDALAARAHPAHALRVEHFAAAAPRVDPAAEQPFLEVELKDSGLTLTVPANRTLLAT  
LRAANVDLQSDCEEGLCGSCEVRVLAGEIDHRDSVLSAGERAAANTRMMACCSRAKRGRIV  
LEL

>BTH\_II2347|KEGG|CYP1013A3|[Burkholderia thailandensis]bte|BP

MSKHRQAPGPRGSLVMGNLAAYKRNPIITMLLRLHQQYGDVARNRLGPFVTHALAHDPDHIQ  
YVLQENHRNYVRGRFYDNFKMFFGDGLLTTDGEFWRRHRAVQPLFHKKQVDAHTAAVGD  
AALALAHRSALPPGKAVDVVEEMHLSLRMLGLMVFNNTDVSSHAEAVGPAVRFGIEAMM  
PQGNMNDFI PRWAPTRFNRRIAHARRAIDTIIAKIIADHREARCEPSDVISLLLLNARDPD  
TGAPMTQQEVHDEVMTVFLAGHETTGAAGLAWALYALAQHPAVLRQLRDELDARLGGRAPT  
VQDFEQLPYLSQVVDEVLRVYPPIWGFTRDLVEDDEIGGYRIPARSSVFMSPPYVTHRHPA  
FWRNPDAFDPENFASDAPARHRFVYFPFGGMRKCIGFQTALLQMRVLVAVVAQHFDLNA  
LPGHPIELGAAISLRPVHGIRLIVKPRERQQSHLARVREHESARALRPLGDTAEAAGAVC  
PMTDAAHEICVSADAAMVEAGAPGDANAGGAAAAVERAAARQHEPAAAAPLPFATSAATG  
APPAASPVAAAAAGASARSVPWRFTWRPVPVDPVPDEPSPALSGKRIALVNGRGGTIER  
VAAALARTCAKVSVFAPAANADHAEAAAFVNEAGPLDGIVDLGLEAPFALDDASAWCAP

MRRTVELLKACYGDWAAEDDTSRLFYVALTWMDGQMGYGDDAGAQPLOGGLWAGLAKTLPO  
ELPNCNVRVLDIAPDETGRVDRLVVNELYRWGLFEVGYRNGVRYTLHAKRDELPPLAVDA  
RAALGPGDTVLFSGGARGIGLLCARALAEHRGCTVLVTGRETPPDGGEPWMALDEAGFKR  
YGLEQLRAATPERPPKAIKASLQRLKHRRELKAALDEMAALGLPVHYRVCDVTDRAAVRA  
LCDELGDSLRIVIHNAVDQPVRLIQKRADDFAHTVRTKVLGFANLCDAVRARPRLAQFC  
NVGSLTGRWGGMTGETDYAAANEALARLGLWAAKHALPPACGVKTLVWPTWEGVGMITNF  
AVTQRYVSPMNVEEGVRHWLRELASPGGGEVMFMGAVGRAPTQVQIKGFQPIRELPNIGE  
LVTRRHVGEFVRFRPFKRFEGRYAIDPAVAPYARAFRNGRAVLPAVLVLEHACAVGDW  
VMPPTGEPRELSEMTNVVLRDLDPVPAGDAPVEIASEAAGYMIGDVWCVDVRCSDART  
QAELLSMTLVYRPQPEQIGAAYARAPDTKPEPAPLTSAPHAAWDGELLPAWDVSPDDAS  
AGIVRIGRVPPAAVLSLWTLPPFLELRLPVNHVEHVLRLVLLAEWGAAQTDAPSVWRIGAA  
KLARLPAASADGVVEYATGRFAVLDAARGYVLLRVDDTRVDSDAHAAPAETVALADPLTA

>BTQ\_3316|KEGG|CYP1488A2|[Burkholderia thailandensis]btq|BP

MNGLPPSLPRVDSTESLFAEPLAFLAQARSRHGDVFMREHGPIFSRASDCSGVIAVFGE  
HRLRQILTDIDNFALPMSAAKMALPKNLVNLNRGLHSMREPEHGRHKRLLTGTINRELF  
DAHRFEIRAALNRFCEMLKVDRRISVVSARMRELTVEMASHIFLGAQCQEDDELAFLLSAY  
FTLRREASSLNARDPLLYRDELIGVGQQLDRTLREIRIRYRKRVPDARAGLLQRLATAGP  
PGSPALSEDEIVGHANVMFVSSTEPVAMSLTWLLLVLSQLPDLRRALRAEIADRASMPAS  
TNGASWLENNVNETLRLTPNALMVRATTRAVALQGVLPARCEIVVCPFLAHREAKPFP  
DPHAFSPSRWETARPSPEYFPPFGAGGHFCAGRNLALESLIREVLSTLLSRFDFVLDGEQS  
IDWRIHIMLMPKGDPAALIAHPVDERGDTSPSPKWRGPITDLFHFAPGLS

>BTQ\_3727|KEGG|CYP212A12|[Burkholderia thailandensis]btq|BP

MSRDLPGTLAAWQKAYGDIVHLRIWPEHDVVVADPQLARALLVTHHDALIRWERGIRVLS  
QVHGHSVLTAEGEAWRTRRHVLPNFSKAVQGFSPITVKAATRAFAQWPREDADWHIES  
ALTMLTMDVILQMVFSSTLGEDVRVAEQAIRVASAAANAEFYWPTSMPDWMPWKREKRQA  
LRTLKDLIERHLQRLKLACDAWPDDLLSCLLQSREDASALSQNVRDECMITIFLAGHET  
TAATLVWWAWCMASNPEAQRVARDEVQRVLQGNAPVAETLPELGYLVQTIKETLRRYPVA  
PLLISSRRATRAIQLDGAWLPARTLFMIPAHLMHHDARWFPDPEAFRPERFAPDAPEVPRG  
AYIPFGAGPRVCLGQHLAMAEMTVIAAMLLQRFVLSAPDGSAPHPVNLNVTLRPAQPMHL

AITQVDPRIA

>BTQ\_4014|KEGG|CYP116B128|[Burkholderia thailandensis]btq|BP

MTHSASTPPASPAQCPLHPVSDDAAAHAPAGCPASAGAAAFDPFDDAYQQDPPEYVRWAR  
EQEPVFYSPKLGWIVTRYDDIKAIFRDNRTFSPSIALEKITPTGPDANAVLASYGAMN  
RTLVNEDEPAHMARRRLLEPFTPDALRAHEPMVRLAREYVDRFVDDGRADLVDQMLWE  
VPLTVALHFLGVPEEDMDTLRKYSIAHTVNTWGRPRPDEQVAVAHAVGQFWRYAGKVLEK  
MREDPSGPGWMQFGIRMQREHPDIVTDSYLHSMAGIVAAHETTANATANALKLLLQHP  
RAWRELCDDPSLIPNAVDECLRHNGSIAAWRRIATCDATVGGVAIPAGAKLLIVTSSANR  
DERRFADADLFDIHRDDCAEHLTFGYGAHQCMGKHLARMEMQIFIDELTRRLPHMRLAEQ  
RFTYVPNTSFRGPEHLWVEWDPANPERRRADARRPALAVRIGESNARGAGRALRVDSMT  
PVAERVLRLVRLVAPGGEPLPRWSAGAHIDIECGDTGLSRQYSLCGDPAERGAYEIAVIRE  
PASRGGSAMWHERLRPGMRVKIRGPRNHFRDLAASRAILIAAGGIGITPIGAIRQARAG  
GIDYTLHYCGRSRRTMAFVDELAALHGERLRLHVSDEGTRADFSALDVAPGTQVYACGPA  
RMLDALAARAAHWPAAHALRVEHFAAAAPRVDPAAEQPFLEVELKDSGLTLTVPANRTLLAT  
LRAANVDLQSDCEEGLCGSCEVRVLAGEIDHRDSVLSAGERAAANTRMMACCSRAKRGRIV  
LEL

>BTQ\_5633|KEGG|CYP1013A3|[Burkholderia thailandensis]btq|BP

MSKHRQAPGPRGSLVMGNLAAYKRNPIITMLRLHQQYGDVARNRLGPFVTHALAHDPDHIQ  
YVLQENHRNYVRGRFYDNFKMFFGDGLLTDDGEFWRRHRRRAVQPLFHKKQVDAHTAAVGD  
AALALAHWSALPPGKAVDVVEEMMHLSLRMLGLMVFNNTDVSSHAEAVGPAVRFGIEAMM  
PQGNMNDFI PRWAPTRFNRRIAHARRAIDTIIAKIIADHREARCEPSDVISLLLNARDPD  
TGAPMTQQEVHDEVMTVFLAGHETTGAGLAWALYALAQHPAVLRQLRDELDARLGGRAPT  
VQDFEQLPYLSQVVDEVLRVYPPIWGFTRDLVEDDEIGGYRIPARSSVFMSPYVTHRHPA  
FWRNPDAFDPENFASDAPARHRFVYFPFGGMRKCIGFQTALLQMRVLVAVVAQHFDLNA  
LPGHPIELGAAISLRPVHGIRLIVKPRERQQSHLARVREHESARALRPLGDTAEAAGAVC  
PMTDAAHEICVSADAAMVEAGAPGDANAGGAAAVERAAARQHEPAAAAPLPFATSAATG  
APPAASPVAAAAAGASARSVPARFTWRPVPVDPVPDEPSPALSGKRIALVNGRGGTIER  
VAAALARTCAKVSFAPAAANADHAEAAAFVNEAGPLDGLVDLGLLEAPFALDDASAWAP  
MRRTVELLKACYGDWAAEDDTSRLFYVALTWMDGQMGYGDDAGAQLGLWAGLAKTLPLQ



ELPNCNVRVLDIAPDETGRVDRLVVNELYRWGLFEVGYRNGVRYTLHAKRDELPPPLAVDA  
RAALGPGDTVLFSGGARGIGLLCARALAERHGCTVLVTGRETTPDGGEPPWMALDEAGFKR  
YGLEQLRAATPERPPKAIRASLQRLKHRRELKAALDEMAALGLPVHYRVCDVTDRAAVRA  
LCDELGDSLRIVIHNAGVDQPVRLIQKRADDFAHTVRTKVLGFANLCDAVRARPRLAQFC  
NVGSLTGRWGGMTGETDYAAANEALARLGLWAAKHALPPACGVKTLVWPTWEGVGMITNF  
AVTQRYVSPMNVEEGVRHWLRELASPGGGEVMFMGAVGRAPTPVQIKGFQPIRELPNIGE  
LVTRRHVGEFVRFRPFKRFEGRYAIDPAVAPYARAFRFNGRAVLPAASLVLEHACAVGDW  
VMPPTGEPRELSEMTNVVLRDLALPDVPAGDAPVEIASEAAGYMIGDVWCVDVRCSDART  
QAELLSMTLVYRPQPEQIGAAYARAPDTKPEPAPLTSAPHAAWDGELLPAWDWSVPDDAS  
AGIVRIGRVPPAAVLSLWTLPPFLELRLPVNHVEHVLRLVLLAEWGAAQTDAPSVWRIGAA  
KLARLPAASADGVVEYATGRFAVLDAARGYVLLRVDDTRVDSDAHAAPAETVALADPLTA

>BTJ\_4293|KEGG|CYP1013A3|[Burkholderia thailandensis]btj|BP

MSKHRQAPGPRGSLVMGNLAAYKRNPITMLLRHLHQYGDVARNRLGPFVTHALAHDPDHIQ  
YVLQENHRNYVRGRFYDNFKMFFGDGLLTDDGEFWRRHRAVQPLFHKKQVDAHTAAVGD  
AALALAHRSALPPGKAVDVVEEMHLSLRMLGLMVFNDDVSSHAEAVGPAVRFGIEAMM  
PQGNMNDFI PRWAPTRFNRRIAHARRAIDTIIAKIIADHREARCEPSDVISLILLNARDPD  
TGAPMTQQEVHDEVMTVFLAGHETTGAGLAWALYALAQHPAVLRQLRDELDARLGGRAPT  
VQDFEQLPYLSQVVDEVLRVYPPPIWGFTRDLVEDDEIGGYRIPARSSVFMSPYVTHRHPA  
FWRNPDAFDPENFASDAPARHRFVYFPFGGGMKRCIGFQTALLQMRVLVAVVAQHFDLNA  
LPGHPIELGAAISLRPVHGIRLIVKPRERQQSHLARVREHESARALRPLGDTAEAAGAVC  
PMTDAAHEICVSADAAMVEAGAPGDANAGGAAAAVERAAARQHEPAAAAPLPFATSAATG  
APPAASPVAAAAGASARSPAWRFTWRPVVPDVPDEPSPALSGKRIALVNRRGGTIERV  
AAALARTCAKVSVFAPAANADHAEAAARAFVNEAGPLDGIIVDLGLEAPFALDDASAWAEP  
RRTVELLKACYGDWAAEDDTSRLFYVALTWMDGQMGYGGDAGAQLGGLWAGLAKTLQP  
LPNCNVRVLDIAPDETGRVDRLVVNELYRWGLFEVGYRNGVRYTLHAKRDELPPPLAVDAR  
AALGPGDTVLFSGGARGIGLLCARALAERHGCTVLVTGRETTPDGGEPPWMALDEAGFKRY  
GLEQLRAATPERPPKAIRASLQRLKHRRELKAALDEMAALGLPVHYRVCDVTDRAAVRAL  
CDELGDSLRIVIHNAGVDQPVRLIQKRADDFAHTVRTKVLGFANLCDAVRARPRLAQFCN  
VGSALTGRWGGMTGETDYAAANEALARLGLWAAKHALPPACGVKTLVWPTWEGVGMITNFA  
VTQRYVSPMNVEEGVRHWLRELASPGGGEVMFMGAVGRAPTPVQIKGFQPIRELPNIGEL  
VTRRHVGEFVRFRPFKRFEGRYAIDPAVAPYARAFRFNGRAVLPAASLVLEHACAVGDWV

MPPTGEPRELSEMTNVVLRLDALPDVPAGDAPVEIASEAAGYMIGDVWCVDVRCSDARTQ  
AELLSMTLVYRPQPEQIGAAAYARAPDTKPEPAPLTSAPHAAWDGELLPAGDWSVPDDASA  
GIVRIGRVPPAAVLSLWTLFPFLELRLPVNHVEHVLRLVLLAEWGAAQTDAPSVWRIGAAK  
LARLPAASADGVVEYATGRFAVLDARGYVLLRVDDTRVDSDAHAAPAETVALADPLTA

>BTJ\_4348|KEGG|CYP1488A2|[Burkholderia thailandensis]btj|BP

MNGLPPSLPRVDSTESLFAEPLAFLAQARSRHGDVFMREHGPIFSRASDCSGVIAVFGE  
HRLRQILTDIDNFALPMSAAKMALPKNLVNLNRGLHSMREPEHGRHKRLLTGTINRELF  
DAHRFEIRAALNRFCEMLKVDRRISVVSARMRELTVMASHIFLGAQCQEDDELAFLLSAY  
FTLRREASSLNARDPLLYRDELIGVGQQLDRTLREIRRYRKRPVDARAGLLQRLATAGP  
PGSPALSEDEIVGHANVMFVSSTEPVAMSLTWLLLVLSQLPDLRRALRAEIADRASMPAS  
TNGASWLENNVNETLRLLTPNALMVRATTRAVSLQGVALPARCEIVVCPFLAHREAKPFP  
DPHAFSPSRWETARPSPYEYFPFGAGGHFCAGRNLALESLIREVLSTLLSRFDFVLDGEQS  
IDWRIHIMLPKGDPALIAHPVDERGDTSPKWRGPITDLFHFAPGLS

>BTJ\_4761|KEGG|CYP212A12|[Burkholderia thailandensis]btj|BP

MSRDLPGTLAAWQKAYGDIVHLRIWPEHDVVVADPQLARALLVTHHDALIRWERGIRVLS  
QVHGHSVLTAEGEAWRTRRHALVPNFSPKAVQGFSPPTIVKAATRAFAQWPREDADWHIES  
ALTMLTMDVILQMVFSSTLGEDVRVAEQAIRVASAAANAEFYWPASMPDWMPWKREKRQA  
LRTLKDLIERHLQRRLKLACDAWPDDLSCLLQSREDASALSLQNRDECMTIFLAGHET  
TAATLVWWAWCMASNPEAQRVARDEVQRVLQGNAPVAETLPELGYLVQTIKETLRRYPVA  
PLLISSRRATRAIQIGDWALPARTLFMIPAHLMHHDARWFPDPEAFRPERFAPDAPEVPRG  
AYIPFGAGPRVCLGQHLAMAEMTVIAAMLLQRFVLSAPDGSAPPHPVNLNVTLRPAQPMHL  
AITQVDPRIA

>BTJ\_5045|KEGG|CYP116B128|[Burkholderia thailandensis]btj|BP

MTHSASTPPASPAACPLHPVSDDAAAHAPGCPASAGAAAFDPFDDAYQQDPPEYVRWAR  
EQEPVFYSPKLGWIVTRYDDIKAIFRDNRTFSPSIALEKITPTGPDANAVLASYGAMN  
RTLUNEDEPAHMARRLLIEPFTPDALRAHEPMVRLAREYVDRFVDDGRADLVDQMLWE  
VPLTVALHFLGVPEEDMDTLRKYSIAHTVNTWGRPRPDEQVAVAHAVGQFWRYAGKVLEK

MREDPSGPGWMQFGIRMQREHPDIVTDSYLHSM MMAGIVAAHETTANATANALKLLLQHP  
RAWRELCDDPSLIPNAVDECLRHNGSIAAWRRIATCDATVGGVAIPAGAKLLIVTSSANR  
DERRFADADLFDIHRDDCAEHLTFGYGAHQCMGKHLARMEMQIFIDELTRRLPHMRLAEQ  
RFTYVPNTSFRGPEHLWVEWDPAANPERRRADARRPALAVRIGESNARGAGRALRVDSMT  
PVAERVLRLVRLVAPGGEPLPRWSAGAHIDIECGDTGLSRQYSLCGDPAERGAYEIAVLRE  
PASRGSAWMHERLRPGMRVKIRGPRNHFR LDAHASRAIL IAGGIGITPIGA IARQARAG  
GIDYTLHYCGRSRRTMAFVDELAALHGERLRLHVSD EGTRADFSALDVAPGAQVYACGPA  
RMLDALAARAAHWPAAHALRVEHF AAAAPRVDPAAEQPF EVELKDSGLTLTVPANRTLLAT  
LRAANVDLQSDCEEGLCGSCEVRVLAGEIDHRDSVLSAGERAANTRMMACCSRAKRGRIV  
LEL

>BTL\_3516|KEGG|CYP116B128|[Burkholderia thailandensis]btz|BP

MTHSASTPPALPAAQCPLHPVSDDAAAH PAGCPASAGAAAFDPFDDAYQQDPPEYVRWAR  
EQEPVFYSPKLGYWIVTRYDDIKAIFRDNRTFSPSIALEKITPTGPDANAALASYGYAMN  
RTL VNEDEPAHMARRRL LIEPFTP DALRAHEPMVRRLAREYVDRFVDDGRADLVDQMLWE  
VPLTVALHFLGVPEEDMDTLRKYSIAHTVNTWGRPRPDEQVAVAHAVGQFWRYAGKVLEK  
MREDPSGPGWMQFGIRMQREHPDIVTDSYLHSM MMAGIVAAHETTANA IANALKLLLQHP  
RAWRELCDDPSLIPNAVDECLRHNGPIAAWRRIATCDATVGGVAIPAGAKLLIVTSSANR  
DERRFADADLFDIHRDDCAEHLTFGYGAHQCMGKHLARMEMQIFIDELTRRLPHMRLAEQ  
RFTYVPNTSFRGPEHLWVEWDPAANPERRRADARRPALAVRIGESNARGAGRALRVDSMT  
PVAERVLRLVRLVAPGGEPLPRWSAGAHIDIECGDTGLSRQYSLCGDPAERGAYEIAVLRE  
PASRGSAWMHERLRPGMRVKIRGPRNHFR LDAHASRAIL IAGGIGITPIGA IARQARAG  
GIDYTLHYCGRSRRTMAFVDELAALHGERLRLHVSD EGTRADFSALDVAPGTQVYACGPA  
RMLDALAARAAHWPAAHALRVEHF AAAAPRVDPAAEQPF EVELKDSGLTLTVPANRTLLAT  
LRAANVDLQSDCEEGLCGSCEVRVLAGEIDHRDSVLSAGERAANTRMMACCSRAKRGRIV  
LEL

>BTL\_5148|KEGG|CYP1488A2|[Burkholderia thailandensis]btz|BP

MNGLPPSLPRVDSTESLFAEPLAFLAQARSRHGDVFMREHGPIFSRASDCSGVIAVFGE  
HRLRQILTDIDNFALPMSAAAKMALPKNLVNLNRGLHSMREPEHGRHKRLLTGTINRELF

DAHRFEIRAALNRFCEMLKVDRRISVVSRMRELTVMASHIFLGAQCQEDDELAFLLSAY  
FTLRREASSLNARDPLLYRDELIGVGQQLDRTLRRERIRRYRKRPVDARAGLLQRLATAGP  
PGSPALSEDEIVGHANVMFVSSTEPVAMSLTWLLLVLSQLPDLRRALRAEIADRASMPAS  
TNGAPWLENVVNETLRLTPNALMVRATTRAVSLQGVALPARCEIVVCPFLAHREAKPFP  
DPHAFSPSRWETARPSPYEYFPFGAGGHFCAGRNLALSLIREVLSTLLSRFDFVLDGEQS  
IDWRIHIMLMPKGDPALIAHPVDERGDTSPSPKWRGPITDLFHFAPGLS

>BTL\_5546|KEGG|CYP212A12|[Burkholderia thailandensis]btz|BP

MSRDLPGTAAWQKAYGDIVHLRIWPEHDVVVADPQLARELLVTHHDALIRWERGIRVLS  
QVHGHSVLTAEGEAWRTRRHALVPNFSFKAVQGFSPITIVKAATRAFAQWPREDADWHIES  
ALTMLTMDVILQMVFSSSTLGEDVRLAEQAIRVASAAANAEFYWPASMPDWMPWKREKRQA  
LRTLKDLIERHLQRRLLKLACDAWPDDLSCLLQSREDASALSLQNVRECMITIFLAGHET  
TAATLVWWAWCMASNPEAQRVARDEVQRVLQGNAPVAETLPELGYLVQTIKETLRLYPVA  
PLLISRRATRAIQLGDWSLPARTLFMIPVHLMHHDARWFPDPEAFRPERFAPDAPEVPRG  
AYIPFGAGPRVCLGQHLAMAEMTVIAAMLLQRFVLSAPDGSAPPHPVLNVTLRPAQPMHL  
AITQVDPRIA

>BTI\_4127|KEGG|CYP116B103|[Burkholderia thailandensis]btd|BP

MSTPPASPAAQCPFHPPASADVSPHPAGCPASAAAAAFDPFDDAYQQDPPEYVRWAREQEP  
VFYSPKLGWVVARYDDIKAIFRDNRTFSPSIALEKIMPTGADANAVLASYGAMNRTL  
NEDEPAHMARRRLIEPFTPDALRAHEPMVRRRLAREYVDRFVDDGRADLVDQMLWEVPLT  
VALHFLGVPEEDMDTLRQYSIAHTVNTWGRPRPDEQVAVAHAVGQFWQYAGKVLERMRED  
PSGPGWMQFGIRMQREHPDIVTDSYLHSMMMAGIVAAHETTANATANALKLLLQHPHAWR  
ELCEAPSLIPNAVDECLRHNGSIAAWRRIATCDTMVGGAIPAGAKLLIVTSSANRDERR  
FADPDLFDIHRDDCADHLTFGYGSHRCMGKHLARMEMQIFIDELTRRLPHMRLAEQRFTY  
MPNTSFRGPEHLWVEWDPAANPERRRADARRSALAVRIGESNARSAGRALCVDSVTPAAE

RVLRLVRLVAPDGAALPRWSAGAHIDVECGDTGLSRQYSLCGDPVERGAYEIAVLREPASR  
GGSAMWHERLRPGMRVTIRGPRNHFRDLAHAGRTILIAGGIGITPIGAIAREARALGIDY  
TLHYCGRSRRTMAFVDALAALHGGRLRLHVSDEGTRHDFSALDVAPGTQVYACGPARM LD  
ALAARAAHWPADALRVEHFAAAAAPRVDPAAEQPFLEVELKDSGLTLTVPANRSLLVTLRAA  
NVDVQSDCEEGLCGSCEVRVLAGEVDHRDSVLSAGERAANTRMMACCSRAKRGRVLVLEL

>BTI\_4272|KEGG|CYP1486A1|[Burkholderia thailandensis]btd|BP

MRDMSKVEYDAAKIRPFNIDPQVAIIKNPERPEAFPPPLAKVPKSIPGTSGFIAGMKSLF  
AYKREGLQFFANQANIHGKVFRNQLGPYSIVGVVDHEVISQILKNGDRCWSTALAVERT  
RGLSFDIDLKKKSRLMSLDFDAHRQVRTLVPQAFSDRALASYLAIIQQEFTRNIEAWPRD  
GEVPFRVEARQIFSQLAARLFFGIEDSSEARLEGATRDYWNAPVVLKNRHLNERWRRG  
LDGVATLSSIMYDLIPKRRDEGGTDLFSQLCKSREDTGGLDDDQLVDLMLNIVFAAFD TT  
TMGITSMAYLLAKHPHWQEVLRRAESMRLPEQAALADFNMGERTTQVWKETLRMPVSAIT  
PRVSLGECQVGPYVPPRTLVEFNFTGLLGQSDSLWDHPQRFDPERFSPERA EYQRHRGQY  
LPFGHGVHTCVGAALANLEAKVFW SIVLTRYKFS LAKDYDAVHCMNPLGSVSGEVALKVE  
RL

>BTI\_4729|KEGG|CYP1488A2|[Burkholderia thailandensis]btd|BP

MRERGP IFSRASDCSGVIAVFG EHLRLQILTEIDDFALPMSAAAKLALPKNLINLNRGLH  
SMREPEHGRHKRLLTGTINRELFDAHRNGIRAALDRLGERLKEDGRIAVVSRMRELTSEM  
ASHVFLGPRCHEEDAELAFLLSAYFTLRREASSLNARDPHVYRAELIGVGQQLDRTL RER  
IRRYRNGPADDRAGLLRRLATAGLP GSPALSEDEIVGHANVMFVSSTEPVAISLTWLLLV  
LSQLPGLRRALRAE IAGRASSPTSPGGAPLLENVNETLRLLLTPNALMVRATTRA VSLQG  
VALPAHCEIVVCPFLAHREAGPFPDPLAFSPSRWETARPSPYEYFPFGAGGHFCAGRNLA  
LLLIREVLSTLLLRFD FVLDGEQSIDWRIHIMLMPTGDPTLIAHPADERRDTPSPKWRGP  
ATDLFHFAPGLS

>BTHA\_4656|KEGG|CYP212A12|[Burkholderia thailandensis]btv|BP

MSRDLPGTLAAWQKAYGDIVHLRIWPEHDVVVADPQLARALLVTHHDALIRW ERGIRVLS

QVHGHSVLTAEGEAWRTRRHALVPNFSPKAVQGFSPATIVKAATRAFAQWPREDADWHIES  
ALTMLTMDVILQMVSSTLGEDVRVAEQAIRVASAAANAEFYWPTSMPDWMPWKREKRQA  
LRTLKDLIERHLQRRLLKLACDAWPDDLLSCLLQSREDASALSLQNVRECMITIFLAGHET  
TAATLVWWAWCMASNPEAQRVARDEVQRVLQGNAPVAETLPELGYLVQTIKETLRRYPVA  
PLLISRRATRAIQLGDWALPARTLFMIPAHLMHHDARWFPDPEAFRPERFAPDAPEVPRG  
AYIPFGAGPRVCLGQHLAMAEMTVIAAMLLQRFVLSAPDGSAPPHPVNLNVTLRPAQPMHL  
AITQVDPRIA

>BTHA\_5068|KEGG|CYP1488A2|[Burkholderia thailandensis]btv|BP

MSAAAKMALPKNLVNLNRGLHSMREPEHGRHKRLTGTINRELFDAHRFEIRAALNRFCE  
MLKVDRRISVVSRMRELTVMASHIFLGAQCQEDDELAFLLSAYFTLRREASSLNARDPL  
LYRDELIGVGQQLDRTLREIRRYRKRPVDARAGLLQRLATAGPPGSPALSEDEIVGHAN  
VMFVSSTEPVAMSLTWLLLVLSQLPDLRRALRAEIADRASMPASTNGASWLENVVNETLR  
LLTPNALMVRATTRAVALQGVLPARCEIVVCPFLAHREAKPFDPHAFSPSRWETARPS  
PYEYFPFGAGGHFCAGRNLALSLIREVLSTLLSRFDFVLDGEQSIDWRIHIMLMPKGDPA  
LIAHPVDERGDTSPKWRGPITDLFHFAPGLS

>BTHA\_5121|KEGG|CYP1013A3|[Burkholderia thailandensis]btv|BP

MSKHRQAPGPRGSLVMGNLAAYKRNPITMLLRLHQQYGDVARNRLGPFVTHALAHDPDHIQ  
YVLQENHRNYVRGRFYDNFKMFFGDGLLTDDGEFWRRHRRVQPLFHKKQVDAHTAAVGD  
AALALAHRWSALPPGKAVDVVEEMMHLSLRMLGLMVFNNTDVSSHAEAVGPAVRFGIEAMM  
PQGNMNDFI PRWAPTRFNRRIAHARRAIDTIIAKIIADHREARCEPSDVISLLLNARDPD  
TGAPMTQQEVHDEVMTVFLAGHETTGAGLAWALYALAQHPAVLRQLRDELDARLGGRAPT  
VQDFEQLPYLSQVVDEVLRVYPPIWGFTRDLVEDDEIGGYRIPARSSVFMSPYVTHRHPA  
FWRNPDAFDPENFASDAPARHRFVYFPFGGGMKRCIGFQTALLQMRVLVAVVAQHFDLNA  
LPGHPIELGAAISLRPVHGIRLIVKPRERQQSHLARVREHESARALRPLGDTAEAAGAVC  
PMTDAAHEICVSADAAMVEAGAPGDANAGGAAAVERAAARQHEPAAAAPLPFATSAATG  
APPAASPVAAAAAGASARSVPARFTWRPVVPVDPVDEPSPALSGKRIALVNRRGGTIER  
VAAALARTCAKVSFAPAAANADHAEAAAFVNEAGPLDGIVDLGLEAPFALDDASAWAP  
MRRTVELLKACYGDWAAEDDTSRLFYVALTWMDGQMGYGDDAGAQLGGLWAGLAKTLTPQ

ELPNCNVRVLDIAPDETGRVDRLVVNELYRWGLFEVGYRNGVRYTLHAKRDELPPPLAVDA  
RAALGPGD TVLFSGGARGIGLLCARALAERHGCTVLVTGRETPPDGGEPPWMALDEAGFKR  
YGLEQLRAATPERPPKAIRASLQRLKHRRELKAALDEMAALGLPVHYRVCDVTDRAAVRA  
LCDELGDSLRIVIHNAGVDQPVRLIQKRADDFAH TVRTKVLGFANLCDAVRARPRLAQFC  
NVGSLTGRWGGM TGETDYAAANEALARLGLWAAKHALPPACGVKTLVWPTWEGVGMITNF  
AVTQRYVSPMNVEEGVRHWLRELASPGGGEVMFMGAVGRAPT PVQIKGFQPIRELPNIGE  
LVTRRHVGE PVRFRPFKRFEGRYAIDPAVAPYARAFRNGRAVL PASLVLEHACAVGDW  
VMPPTGEPRELTSEMTNVVLRDLDPVPAGDAPVEIASEAAGYMIGDVWCVDVRCSDART  
QAE LLSMTLVYRPQPEQIGAAYARAPDTKPEPAPLTSAPHAAWDGELL PAGDWSVPDDAS  
AGIVRIGRVPPAAVLSLWTL PFPLELRLPVNHVEHVLRLVLLAEWGAAQTDAPSVWRIGAA  
KLARLPAASADGVVEYATGRFAVL DARGYVLLRVDDTRVDSDAHAAPAETVALADPLTA

>BTN\_4756|KEGG|CYP1013A3|[Burkholderia thailandensis]bthe|BP

MSKHRQAPGPRGSLVMGNLAAYKRNPI TMLLR LHQQYGDVARNRLGPFVTHALAHDPDHIQ  
YVLQENHRNYVRGRFYDNFKMFFGDGLLT DGEFWRRHRAVQPLFHKKQVDAHTAAVGD  
AALALAHRSALPPGKAVDVVEEMHLSLRMLGLMVFN TDVSSHAEAVGPAVRFGIEAMM  
PQGNMNDFI PRWAPTRFNRRIAHARRAIDTIIAKIIADHREARCEPSDVISLLLNARDPD  
TGAPMTQQEVHDEVMTVFLAGHETT GAGLAWALYALAQHPAVLRQLRDELDARLGGRAPT  
VQDFEQLPYLSQVVDEVLRVYPPIWGFTRDLVEDDEIGGYRIPARSSVFMSPYVTHRHPA  
FWRNPDAFDPENFASDAPARHRFVYFPFGGGMKRCIGFQTALLQMRVLVAVVAQHFDLNA  
LPGHPIELGAAISLRPVHGIRLIVKPRERQQSHLARVREHESARALRPLGDTAEAAGAVC  
PMTDAAHEICVSADAAMVEAGAPGDANAGGAAAAVERAAARQHEPAAAAPLPFATSAATG  
APPAASPVA AAAAGASARSVPWRFTWRPVVPDPVPDEPSPALSGKRIALVNGRGGTIER  
VAAALARTCAKVS VFAPAANADHAEAAAFVNEAGPLDGIVDLGLEAPFALDDASAW EAP  
MRRTVELLKACYGDWAAEDDTSRLFYVALTWMDGQMGYGDDAGA QPLGGLWAGLAKTLPQ  
ELPNCNVRVLDIAPDETGRVDRLVVNELYRWGLFEVGYRNGVRYTLHAKRDELPPPLAVDA  
RAALGPGD TVLFSGGARGIGLLCARALAERHGCTVLVTGRETPPDGGEPPWMALDEAGFKR  
YGLEQLRAATPERPPKAIRASLQRLKHRRELKAALDEMAALGLPVHYRVCDVTDRAAVRA  
LCDELGDSLRIVIHNAGVDQPVRLIQKRADDFAH TVRTKVLGFANLCDAVRARPRLAQFC  
NVGSLTGRWGGM TGETDYAAANEALARLGLWAAKHALPPACGVKTLVWPTWEGVGMITNF  
AVTQRYVSPMNVEEGVRHWLRELASPGGGEVMFMGAVGRAPT PVQIKGFQPIRELPNIGE

LVTRRHVGEFVRFPRFKRFEGRYAIDPAVAPYARAFRNGRAVLPA SLVLEHACAVGDW  
VMPPTGEPRELSEMTNVVLRDLALPDVPAGDAPVEIASEAAGYMIGDVWCVDVRCSDART  
QAELLSMTLVYRPQPEQIGAAYARAPDTKPEPAPLTSAPHAAWDGELL PAGDWSVPDDAS  
AGIVRIGRVPPAAVLSLWTLPPFLELRFPVNHVEHVLRLVLLAEWGAAQTDAPSVWRIGAA  
KLARLPAASADGVVEYATGRFAVL DARGYVLLRVDDTRVDS DAAHAAPAETVALADPLTA

>BTN\_4810|KEGG|CYP1488A2|[Burkholderia thailandensis]bthe|BP

MNGLPPSLPRVDSTESLFAEPLAFLAQARSRHGDVFMREHGPIFSRASDCSGVIAVFGE  
HRLRQILTDIDNFALPMSAAAKMALPKNLVNLNRGLHSMREPEHGRHKRLLTGTINRELF  
DAHRFEIRAALNRFCEMLKVDRRISVVS RMRELTVMASHIFLGAQCQEDDELAFLLSAY  
FTLRREASSLNARDPLLYRDELIGVGQQLDRTLREIRRYRKRPVDARAGLLQRLATAGP  
PGSPALSEDEIVGHANVMFVSSTEPVAMSLTWLLLVLSQLPDLRRALRAEIADRASMPAS  
TNGASWLENNVNETLRLLTPNALMVRATTRAVSLQGVALPARCEIVVCPFLAHREAKPFP  
DPHAFSPSRWETARPSPYEYFPFGAGGHFCAGRNLA LSLIREVLSTLLSRFDFVLDGEQS  
IDWRIHIMLMPKGDPALIAHPVDERGDTSPSPKWRGPITDLFHFAPGLS

>BTN\_5218|KEGG|CYP212A12|[Burkholderia thailandensis]bthe|BP

MSRDLPGTLAAWQKAYGDIVHLRIWPEHDVVVADPQLARALLVTHHDALIRWERGIRVLS  
QVHGHSVLTAEGEAWRTRRHALVPNFSPKAVQGFSP TIVKAATRAFAQWPREDADWHIES  
ALTMLTMDVILQMVSSTLGEDVRVAEQAIRVASAAANAEFYWPASMPDWMPWKREKRQA  
LRTLKDLIERHLQRRLLKLACDAWPDDLLSCLLQSREDASALSLQNRDECMTIFLAGHET  
TAATLVWWAWCMASNPEAQRVARDEVQRVLQGNAPVAETLPELGYLVQTIKETLRRYPVA  
PLLISSRRATRAIQ LGDWALPARTLFMIPAHLMHHDARWFPDPEAFRPERFAPDAPEVPRG  
AYIPFGAGPRVCLGQH LAMAEMTVIAAMLLQRFVLSAPDGSAPPHPVLNVTLRPAQPMHL  
AITQVDPRIA

>BTRA\_5023|KEGG|CYP1013A3|[Burkholderia thailandensis]bthm|BP

MSKHRQAPGPRGSLVMGNLAAYKRNPITMLLR LHQQYGDVARNRLGPFVTHALAHDPDHIQ  
YVLQENHRNYVRGRFYDNFKMFFGDGLLT DGEFWRRHRRAVQPLFHKKQVDAHTAAVGD  
AALALAHRSALPPGKAVDVVEEMHLSLRMLGLMVFN TDVSSHAEAVGPAVRFGIEAMM



PQGNMNDFI PRWAPTRFNRRIAHARRAIDTIIAKIIADHREARCEPSDVISL LLLNARDPD  
TGAPMTQQEVHDEVMTVFLAGHETTGA GLAWALYALAQH PAVLRQLRDELDARLGGRAPT  
VQDFEQLPYLSQVVDEVLRVYPP I WGFTRDLVEDDEIGGYRI PARSSVFMSPYVTHRHPA  
FWRNPDAFDPENFASDAPARHRFVYFPFGGGM RKCIGFQTALLQMRVLVAVVAQHFDLNA  
LPGHPIELGAAISLRPVHGIRLIVKPRERQQSHLARVREHESARALRPLGDTAE AAGAVC  
PMTDAAHEICVSADAAMVEAGAPGDANAGGAAAVERAAARQHEPAAAAPLPFATSAATG  
APPAASPVAAAAAGASARSVP AWRFTRWPVPVDPVDEPSPALSGKRIALVNGRGGTIER  
VAAALARTCAKVSVFAPAANADHAE AARAFVNEAGPLDGIVDLGLEAPFALDDAS AWEAP  
MRRTVELLKACYGDWAAEDDTSRLFYVALTWMDGQMGYGDDAGA QPLGGLWAGLAKTLPQ  
ELPNCNVRVLDIAPDETGRVDRLVVNELYRWGLFEVGYRNGVRYTLHAKRDEL PPLAVDA  
RAALGPGDTVLFSGGARGIGLLCARALAERHGCTVLVTGRETPPDGGE PWMALDEAGFKR  
YGLEQLRAATPERPPKAIRASLQRLKHRRELKAALDEMAALGLPVHYRVCDVTDRAAVRA  
LCDELGDSL RIVIHNAGVDQPVRLIQKRADDFAH TVRTKVLGFANLCDAVRARPR LAQFC  
NVGSLTGRWGGM TGETDYAAANEALARLGLWAAKHALPPACGVKTLVWPTWEGVGMITNF  
AVTQRYVSPMNVEEGVRHWLRELASPGGGEVMFMGAVGRAPT PVQIKGFQPIRELPNIGE  
LVTRRHVGE PVRFRPFKRFEGRYAIDPAVAPYARAFRNGRAVL PASLVLEHACAVGDW  
VMPPTGEPRELSEMTNVVLRLDALPDVPAGDAPVEIASEAAGYMIGDVWCVDVRCSDART  
QAE LLSMTLVYRPQPEQIGAAYARAPDTKPEPAPLTSAPHA AWDGELLPAGDWSVPDDAS  
AGIVRIGRVPPAAVLSLWTLPPFLELRLPVNHVEHVLRLVLLAEWGAAQTDAPS VWRIGAA  
KLARLPAASADGVVEYATGRFAVLDARGYVLLRVDDTRVDS DAAHAAPAETVALADPLTA

>BTRA\_5078|KEGG|CYP1488A2|[Burkholderia thailandensis]bthm|BP

MNGLPPSLPRVDSTESLFAEPLAFLAQARSRHGDVFVMREHGPIFSRASDCSGVIAVFGE  
HRLRQILTDIDNFALPMSAAAKMALPKNLVNLNRGLHSMREPEHGRHKRLLTGTINRELF  
DAHRFEIRAALNRFC EMLKVDRRISVVS RMRELTVEMASHIFLGAQCQEDDELAFLLSAY  
FTLRREASSLNARDPLLYRDELIGVGQQLDRTL RERIRRYRKRPVDARAGLLQRLATAGP  
PGSPALSEDEIVGHANVMFVSSTEPVAMSLTWLLLVSQLPDLRRALRAEIADRASMPAS  
TNGASWLENNVNETLRL LTPNALMVRATTRA VSLQGVALPARCEIVVCPFLAHREAKPFP  
DPHAFSPSRWETARPSPYEYFPFGAGGHFCAGRNLA LSLIREVLSTLLSRFDFVLDGEQS  
IDWRIHIMLMPKGD PALIAHPVDERGDT PSPKWRGPITDLFHFAPGLS

>BTRA\_5488|KEGG|CYP212A12|[Burkholderia thailandensis]bthm|BP

MSRDLPGTLAAWQKAYGDIVHLRIWPEHDV VVADPQLARALLVTHHDALIRWERGIRVLS  
QVHGHSVLTAEGEAWRTRRHALVPNFSPKAVQGFSPTIVKAATRAFAQWPREDADWHIES  
ALTMLTMDVILQMVFSSTLGEDVRVAEQAIRVASAAANAEFYWPASMPDWMPWKREKRQA  
LRTLKDLIERHLQRRLKLACDAWPDDLSCLLQSREDASALSLQNVRECMITIFLAGHET  
TAATLVWWAWCMASNPEAQQRVARDEVQQRVLQGNAPVAETLPELGYLVQTIKETLRRYPVA  
PLLISSRRATRAIQLGDWALPARTLFMIPAHLMHHDARWFPDPEAFRPERFAPDAPEVPRG  
AYIPFGAGPRVCLGQHLAMAEMTVIAAMLLQRFVLSAPDGSAPPHPVLNVTLRPAQPMHL  
AITQVDPRIA

>DR62\_5346|KEGG|CYP212A12|[Burkholderia thailandensis]btha|BP

MTMLPEHQCPFHRNSPTQARPVGSSGRWPPGPEAGLTGWRLLGAMSRDLPGTLAAWQKAY  
GDIVHLRIWPEHDV VVADPQLARELLVTHHDALIRWERGIRVLSQVHGHSVLTAEGEAWR  
TRRHALVPNFSPKAVQGFSPTIVKAATRAFAQWPREDADWHIESALTMLTMDVILQMVFS  
STLGEDVRLAEQAIRVASAAANAEFYWPASMPDWMPWKREKRQALRTLKDLIERHLQRRL  
KLACDAWPDDLSCLLQSREDASALSLQNVRECMITIFLAGHETTAATLVWWAWCMASNP  
EAQQRVARDEVQQRVLQGNAPVAETLPELGYLVQTIKETLRLYPVAPLLISSRRATRAIQLG  
WSLPARTLFMIPVHLMHHDARWFPDPEAFRPERFAPDAPEVPRGAYIPFGAGPRVCLGQH  
LAMAEMTVIAAMLLQRFVLSAPDGSAPPHPVLNVTLRPAQPMHLAITQVDPRIA

>DR62\_5680|KEGG|CYP116B128|[Burkholderia thailandensis]btha|BP

MTHSASTPPALPAAQCPLHPVSDDAAAHAPAGCPASAGAAAFDPFDDAYQQDPPEYVRWAR  
EQEPVFYSPKLGWIVTRYDDIKAIFRDNRTFSPSIALEKITPTGPDANAALASYGYAMN  
RTL VNEDEPAHMARRRLLEPFTP DALRAHEPMVRLAREYVDRFVDDGRADLVDQMLWE  
VPLTVALHFLGVPEEDMDTLRKYSIAHTVNTWGRPRPDEQVAVAHAVGQFWRYAGKVLEK  
MREDPSGPGWMQFGIRMQREHPDIVTDSYLHSMAGIVA AHETTANATANALKLLLQHP  
RAWRELCDDPSLIPNAVDECLRHNGPIAAWRRIATCDATVGGVAIPAGAKLLIVTSSANR  
DERRFADADLFDIHRDDCAEHLTFGYGAHQCMGKHLARMEMQIFIDELTRRLPHMRLAEQ  
RFTYVPNTSFRGPEHLWVEWDPAANPERRRADARRPALAVRIGESNARGAGRALRVDSMT  
PVAERVLRLVAPGGEPLPRWSAGAHIDIECGDTGLSRQYSLCGDPAERAAYEIAVLRE  
PASRGGSAMWHERLRPGMRVKIRGPRNHFRDLA HASRAIL IAGGIGITPIGA IARQARAG

GIDYTLHYCGRSRRTMAFVDELAALHGERLRLHVSDEGTRADFSALDVAPGTQVYACGPA  
RMLDALAARAAHWPAAHALRVEHFAAAAPRVDPAAEQPFLEVELKDSGLTLTVPANRTLLAT  
LRAANVDLQSDCEEGLCGSCEVRVLAGEIDHRDSVLSAGERAANTRMMACCSRAKRGRIV  
LEL

>DR62\_4913|KEGG|CYP1488A2|[Burkholderia thailandensis]btha|BP

MNGLPPSLPRVDSTESLFAEPLAFLAQARSRHGDVFMREHGPIFSRASDCSGVIAVFGE  
HRLRQILTDIDNFALPMSAAAKMALPKNLVNLNRGLHSMREPEHGRHKRLLTGTINRELF  
DAHRFEIRAALNRFCEMLKVDRRISVVSRMRELTVMASHIFLGAQCQEDDELAFLLSAY  
FTLRREASSLNARDPLLYRDELIGVGQQLDRTLREIRIRYRKRKRPVDARAGLLQRLATAGP  
PGSPALSEDEIVGHANVMFVSSTEPVAMSLTWLLLVLSQLPDLRRALRAEIADRASMPAS  
TNGAPWLENNVNETLRLLTPNALMVRATTRAVSLQGVALPARCEIVVCPFLAHREAKPFP  
DPHAFSPSRWETARPSPEYFPPFGAGGHFCAGRNLALESLIREVLSTLLSRFDFVLDGEQS  
IDWRIHIMLMPKGDPALIAHPVDERGDTSPKWRGPITDLFHFAPGLS

>DR62\_07990|KEGG|CYP1013A3|[Burkholderia thailandensis]btha|BP

MPVDPVPDEPSPALSGKRIALVNGRGGTIERVAAALARTCAKVSVFAPAANADHAEAAARAFVNEAGPLDGIVDLGLEAPFALDDASAWAEMRRTV  
ELLKACYGDWAAEDDTSRLFYVALTWMDGQMGYGDAAGAQLGGLWAGLAKTLPQELPNCNVRVLDIAPDETGRVDRLVVNELYRWGLFEVGYRNG  
VRYTLHAKRDELPPLAVDARAALGPGDTVLFSGGARGIGLLCARALAEHGGCTVLVTGRETPPDGGEPWMALDEAGFKRYGLEQLRAATPERPPKA  
IRASLQRLKHRRELKAALDEMAALGLPVHYRVCDVTDRAAVRALCDELGDSLRIVIHNAGVDQPVRLIQKRADDFAHTVRTKVLGFANLCDAVRAR  
PRLAQFCNVGSLTGRWGGMTGETDYAAANEALARLGLWAAKHALPPACGVKTLVWPTWEGVGMITNFAVTQRYVSPMNVEEGVRHWLRELASPGGG  
EVMFMGAVGRAPTPVQIKGFQPIRELPNIGELVTRRHVGEVPRFRPFKRFEGRYAIDPAVAPYARAFRNGRAVLPASLVLEHACAVGDWVMPPT  
GEPRELSEMTNVVLRDLALPDVPAGDAPVEIASEAAGYMIGDVWCVDVRCSDARTQAELLSMTLVYRPQPEQIGAAYARAPDTKPEPAPLTSAPHA  
AWDGELLPAGDWSVPDDASAGIVRIGRVPPAAVLSLWALPFPLELRPLPVNHVEHVLRLVLLAEWGAAQTDAPSVWRIGAAKLARLPAASADGVVEYA  
TGRFAVLDAARGYVLLRVDDTRVDSDAHAAPAETVALADPLTA

>BG87\_5090|KEGG|CYP1013A3|[Burkholderia thailandensis]bthl|BP

MSKHRQAPGPRGSLVMGNLAAYKRNPIITMLRLHQQYGDVARNRLGPFVTHALAHDPDHIQ  
YVLQENHRNYVRGRFYDNFKMFFGDGLLTDDGEFWRRHRAVQPLFHKKQVDAHTAAVGD  
AALALAHRSALPPGKAVDVVEEMHLSLRMLGLMVFNNTDVSSHAEAVGPAVRFGIEAMM  
PQGNMNDFI PRWAPTRFNRRIAHARRAIDTIIAKIIADHREARCEPSDVISLILLNARDPD  
TGAPMTQQEVHDEVMTVFLAGHETTGAGLAWALYALAQHFAVLRQLRDELDARLGGRAPT

VQDFEQLPYLSQVVDEVLRVYPPIWGFTRDLVEDDEIGGYRIPARSSVFMSPYVTHRHPA  
FWRNPDAFDPENFASDAPARHRFVYFPFGGGMKRCIGFQTALLQMRVLVAVVAQHFDLNA  
LPGHPIELGAAISLRPVHGIRLIVKPRERQQSHLARVREHESARALRPLGDTAEAAGAVC  
PMTDAAHEICVSADAAMVEAGAPGDANAGGAAAAVERAAARQHEPAAAAPLPFATSAATG  
APPAASPVAAAAAGASARSVPAWRFTWRPVPVDPVPDEPSPALSGKRIALVNGRGGTIER  
VAAALARTCAKVSVFAPAANADHAEAAARAFVNEAGPLDGIVDLGLEAPFALDDASAWEAP  
MRRTVELLKACYGDWAAEDDTSRLFYVALTWMDGQMGYGDDAGAQLGGLWAGLAKTLPQ  
ELPNCNVRVLDIAPDETGRVDRLVVNELYRWGLFEVGYRNGVRYTLHAKRDELPPLAVDA  
RAALGPGDTVLFSGGARGIGLLCARALAERHGCTVLVTGRETPPDGGEPPWMALDEAGFKR  
YGLEQLRAATPERPPKAIRASLQRLKHRRELKAALDEMAALGLPVHYRVCDVTDRAAVRA  
LCDELGDSLRIVIHNAGVDQPVRLIQKRADDFAHTVRTKVLGFANLCDAVRARPRLAQFC  
NVGSLTGRWGGMGETDYAAANEALARLGLWAAKHALPPACGVKTLVWPTWEGVGMITNF  
AVTQRYVSPMNVEEGVRHWLRELASPGGGEVMFMGAVGRAPTVPQIKGFQPIRELPNIGE  
LVTRRHVGEFVRFRPFKRFEGRYAIDPAVAPYARAFRNGRAVLPAASLVLEHACAVGDW  
VMPPTGEPRELSEMTNVVLRDLALPDVPAGDAPVEIASEAAGYMIGDVWCVDVRCSDART  
QAELLSMTLVYRPQPEQIGAAYARAPDTKPEPAPLTSAPHAAWDGELLPAGDWSVPDDAS  
AGIVRIGRVPPAAVLSLWTLPPFLELRLPVNHVEHVLRVLLAEWGAAQTDAPSVWRIGAA  
KLARLPAASADGVVEYATGRFAVLDAARGYVLLRVDDTRVDSDAHAAPAETVALADPLTA

>BG87\_5145|KEGG|CYP1488A2|[Burkholderia thailandensis]bthl|BP

MNGLPPSLPRVDSTESLFAEPLAFLAQARSRHGDVFMREHGPIFSRASDCSGVIAVFGE  
HRLRQILTDIDNFALPMSAAKMALPKNLVNLRGLHSMREPEHGRHKRLLTGTINRELF  
DAHRFEIRAALNRFCEMLKVDRRISVVSRMRELTVMASHIFLGAQCQEDDELAFLLSAY  
FTLRREASSLNARDPLLYRDELIGVGQQLDRTLREIRIRYRKRVPDARAGLLQRLATAGP  
PGSPALSEDEIVGHANVMFVSSTEPVAMSLTWLLLVLSQLPDLRRALRAEIADRASMPAS  
TNGASWLENNVNETLRLTPNALMVRATTRAVSLQGVALPARCEIVVCPFLAHREAKPFP  
DPHAFSPSRWETARPSPYEYFPFGAGGHFCAGRNLALESLIREVLSTLLSRFDFVLDGEQS  
IDWRIHIMLMPKGDPALIAHPVDERGDTSPKWRGPITDLFHFAPGLS

>BG87\_5559|KEGG|CYP212A12|[Burkholderia thailandensis]bthl|BP

MSRDLPGTLAAWQKAYGDIVHLRIWPEHDVVVADPQLARALLVTHHDALIRWERGIRVLS

QVHGHSVLTAEGEAWRTRRHALVPNFSPKAVQGFSPATIVKAATRAFAQWPREDADWHIES  
ALTMLTMDVILQMVSSTLGEDVRVAEQAIRVASAAANAEFYWPTSMPDWMPWKREKRQA  
LRTLKDLIERHLQRRLLKLACDAWPDDLSCLLQSREDASALSLQNRDECMITIFLAGHET  
TAATLVWWAWCMASNPEAQRVARDEVQRVLQGNAPVAETLPELGYLVQTIKETLRRYPVA  
PLLISRRATRAIQLGDWALPARTLFMIPAHLMHHDARWFPDPEAFRPERFAPDAPEVPRG  
AYIPFGAGPRVCLGQHLAMAEMTVIAAMLLQRFVLSAPDGSAPPHPVLNVTLRPAQPMHL  
AITQVDPRIA

>BG90\_1030|KEGG|CYP266A2|[Burkholderia oklahomensis]boc|BP

MDSAAVNKEEAVLNILAPENLRNPYPMFQYLLSEAPLFFDENSIFYVVS RHEDIERLMK  
DPRVSADRYTTLAADTPAEDRDMNDAIVRYLSMFLNLEGERHTRLRNLTNKSFLPKHME  
SLGPFAQEVTDDELDAVEKKGELEIISDLAFPMPIRFICRILGLPNADVQLIKTSLSDYVS  
VYVGSAGKAPGCIPLAHRGFTELADLFYPVVQERRKNPTDDLVS SLINVRIGDDVLSDEE  
VVANCILFLVSGFETTTNLIAAGTLALLEHPDQLSLLKNDPTLIDGAIEEMLRFYPPVNR  
TARVLTDDVELHGVTLKKGQIIILMLGAGNRDPRVFAHPDSFDIWRPRTGKILSFGSGHH  
FCVGSHLARLEAKIAIQSLLHRFPALKLNHESISWRGESRFRGLQSMTISL

>BG90\_4037|KEGG|CYP1013A3|[Burkholderia oklahomensis]boc|BP

MSKHRQAPGPRGSLVMGNLAAYKRNPITMLLR LHQQYGDVARNRLGPFITHALAHDPDHVQ  
YVLQENHRNYVRGRFYDNFKMFFGDGLLTDDGEFWRRHRRAVQPLFHKKQVDAHTAAVGD  
AALALAHRWSALPPGKAVDVVEEMMHLSLRMLGLMVFN TDVSTHAEAVGPAVRFGIEAMM  
PQGNMNDFI PRWAPTRFNRRIAHARRAIDTIIAKIIADHRDERCEPSDVISLLLNARDPD  
TGAPMTQQEVHDEVMTVFLAGHETTGAGLAWALYALAQHPAVLRQLRDELDARLGGRAPT  
VQDFEQLPYLSQVVDEVLRVYPPIWGFTRDLVEDDEIGGYRIPARSSVFMSPYVTHRHPA  
FWRNPDAFDPENFASDAAARHRFVYFPFGGGMKRCIGFQTALLQMRVLVAVIAQHFDLNV  
LPGHPIELGATISLRPMHGIRLIVKPRERQQSHLARVREHEAARALRPLGDTIEPTGAAC  
PMAAAGASAAAGADAAAGADAAAESAQALDVAHASGA AVADERAAARQHADAARLSLATP  
SDAAADASARGVPAWRFTWRPAPVDPVPDAPSPALSGKRIALVNGRGGTVERIAAALART  
CAKVS VFAPAANADDAEAARTFVNEAGPLDGIVDLGLEAPFALDDASAW EAPMRRTVELL  
KACYGDWAAEDDTSRLFYVALTWMDGMMGYGDAAAGAQLGGLWAGLAKTLPQELPNCNV

RVLDISPDETGRVDRLVVNELYRWGLFEVGYRRGVRYTLHARRNELPPLAVDARTTTLTAG  
DTVLFSGGARGIGLLCARALAERHGCATIVTGREAPPDGSEPWMALDDAGFKRYSLEQLR  
AATPDNPPKAIRATLQRLKRRRELKAALDEMAALDLPVRYRVCDVTDRAAVRALCDELGD  
SLRMVIHNAGVDQPVRLIQKGADDFARTVRTKVLGFANLCDAVRARPRLVQFCNVGSLTG  
RWGGMTGETDYAAANEALARLGLWAAKHVLPPACGVKTLVWPTWEGVGMITNFSVTQRYI  
TPMNVDEGVRHWLRELASPGSGEVMFMGAVGRAPTQVQIKGFQPIRELPNIGELVTRRH  
VGEPLRFRPFKRFEGRYAIDPAVAPYAYAFRFGRAVLPAVLVLEHACAVGDWVMPPTGE  
PRDLSEMTNVVLRLDALPDVPNGGAPVEIGSEAAGYMIGDVWCVDVRCSDARTQTELLSM  
TLVYRPEPEQIGAAYARPPGATPEPPRLTSAPHAAWNGLLPAGDWSVPDDASAGIVRIG  
RVPPAAVLSLWTLPPFLELRLPVNHVEHVLRVLLAEWGAAQSDAPAVWRIGSAKLARLPA  
SSADGVVEYATGRFAVVDARGYVLLRLDDTRVDAARTMQPEAGALADSMTA

>WS70\_22015|KEGG|CYP117C2|[Burkholderia mayonis]buu|BP

MLLNPLNRRVREQQGMPVMAGAFPVLGHLPAVMSSLTDLLRYAEQRHGHFWLEMGTFG  
MLVCTQPEAFALFKNKHVLTDLLEGEVAPPLKDTMATQDGDSTRWANPAFQPQGLTG  
AKVGDLFADIMLARIGQWPVSAPIRLVDEVSDMSLTMIFRMLGVDEQAIAEWTRFYSDYF  
LVSAPVVDLPGTRFRSRHAQTWIDANLQTLIDDARARPDAGLLAMLVHSIVSSNVALT  
DASLLANLRALIHAHKTTAVTMAQLVIKIAQHPEYWALLCAEAKSIGEVPRNPANLVSF  
PYAEALFRETTRYHPAFPLALRRTEEALDLGGRSIEAGTRFIIPLVLLSRNAELYPQPDV  
FMPGRWMGRNEGLKPIDTMQFGNGPHRCLGYHTAWMQLVQFAVALALTLARGVRPRLVS  
SDAGRHRFFPLTYPRTTRIAFE

>AOJ05625.1|NCBI|CYP1013A3|[Burkholderia mayonis]buu|BP

MSKHRQAPGPRGSLVMGNLAAYKRNPITMLRLHQYGDVARNRLGPFVTHALAHDPDHVQ  
YVLQENHRNYVRGRFYDNFKMFFGDGLLTDDGEFWRRHRAVQPLFHKKQVDAHTAAVGD  
AALALAHRSALPPGKSIDVVEEMHLSRLMLGLMVFNTDVSTHAEAVGPAVRFGIEAMM

PQGNMNDFI PRWAPTRFNRRIAHARRAIDTIIAKIIADHRDERCEPSDVISL LLLNARDPD  
TGAPMTQQEVHDEVMTVFLAGHETTGA GLAWALYALAQH PAVLRQLRDELDARLGGRAPT  
VQDFEQLPYLSQVVDEVLRVYPP I WGFTRDLVEDDEIGGYRI PARSSVFMSPYVTHRHPA  
FWRNPDAFDPENFASEAAARH RFVYFPFGGMRKCIGFQTALLQMRVLVAVVAQHFDLNA  
LPGHPIELGATISLRPVHGIRLVVKPRERQQSHLARVREHEAARALRPLGDTVEPTGAAC  
PMAAAGEIGASAAAGAAESAQALDVAHASGPAVADERAANRQHADAARLSLATPSTAAP  
RDAAADASARGVPAWRFTWRPAPVDPVPDAPSPALSGKRIALVNGRGGTVERITAALART  
CTKVS VFAPAANADYAEAARTFVNEAGPFDGIVDLGLEAPFTLDDASAW EAPMRRTVELL  
KACYGDWAAEDDTSRLFYVALTWMDGMMGYGDAAAGAQLGGLWAGLAKTLPQELPNCNV  
RVLDIAPDETGRVDRLVVNELYRWGFFEVGYRQGVRYTLHARRNELPPLAVDARASLAPG  
DTVLFSGGARGIGLLCARALAERHGCTVIVTGREASPDGSEPWMALDDEGFKRYGLEQLR  
AATPDNPPKAIRAMLQRLKRRRELKAALDEMAALDLPVRYRVCDVTDRAAVRALCDELGD  
SLRMVIHNAGVDQPVRLIQKGADDFARTVVRTKVLGFANLCDAVRTRPRLVQFCNVGSLTG  
RWGGMTGETDYAAANEGLARLGLWAAKHALPPACGVKTLVWPTWEGVGMITNFAVTQRYI  
TPMNVDEGVRHWLRELASPGSGEVMFMGAVGRAPT PVQIKGFLPIRELPNIGELVTRRHH  
VGEPLRFRPFKRFEGRYAIDPAVAPYAHAFRFNGRAVL PASLVLEHACAVGDWVMPPTGE  
PRDLSEMTNVVLRLDALPDVSNGGAPVEIGSEAAGYMIGDAWCVDVRCSDARTQAELLSM  
TLVYRTEPEQIGAAYARPPDATLEPSRLTSAPHA AWNGDLLPAGDWSVPDDASAGIVRIG  
RVPPAAVLSLWTL PFPLELRLPVNHVEHVLRVLLAEWGAAQSDAPAVWRIGGAKLARLPA  
SSADGVVEYATGRFAMIDARGYVLLRLDDTRVDAAQATQPEAGALADPLTA

>Bcep1808\_5445|KEGG|CYP229F5|[Burkholderia vietnamiensis]bvi|BP

MNPTDPIAAVTHRDPYPYYATLVDGPPLAFDATLGLWVASRAASVAAVLGHPACRVRPLD  
APVPPALRGTTAGALFGDLIRMNDGALRHDVVKQALRAAFASIDAHALRERTASLAGRRL  
RAPLDAEALNAWCLTVPVCAVADLLGFDEAQLDDIAALVVAFAALSPLSDDAALARASD  
AARHLLERMTERVARTRARDGSLVAAVQDAARAAGWQAGGALVANLVGLLSQTCEASAAW  
LGNVLIaweESARASADGGRAIPDAAALDAFVAEVGRFDSVPVQNTRRFVASHTTIEGVSV  
DAGAAILVVLAAANRDPVHREPHRLLPGRAPPTFGFGTGPHGCPGERIARAVTTGAFD  
AWLHASSGELPSGLVWDYRASTNIRMPNFGIASQA

>AK36\_3459|KEGG|CYP229F5|[Burkholderia vietnamiensis]bve|BP

MNPTDPIAAVTHRDPYPYYATLVDGPPLAFDATLGLWVASRAASVAAVLGHPTCRVRPLD  
APVPPALRGTTAGALFGDLIRMNDGALRERTASLAGRRLRAPLDAEALNAWCLTVPVCAV  
ADLLGFDEAQLDDIAALVVAFAALSPLSDDATLARASDAARRLLERMTERVARTRARDG  
SLVAAVQDAARAAGWQAGGALVTNLVGLLSQTCEASAAWLGNALIAWEESARASADGGRA  
IPDAAALDAFVAEVGRFDSVPVQNTRRFVASHTTIEGVSVSDAGAAILVVLAAANRDPVHR  
EPHRLLPGRAPPTFGFGKGPHGCPGERIARAVTTGAFDVWLHASSGELPSGLVWDYRAS  
TNIRMPNFGIASQA

>Bcep18194\_B0775|KEGG|CYP229F2|[Burkholderia lata]bur|BP

MNPTDPIAAVTHRDPYPYYAALVDGPPLAFDATLGLWVASRAAAVTAVLGHPACRVRPLD  
APVPPALRGTTAGALFGELVRMNDGALRHDVVKQALRTAFAPIDTVALRDRVTVQLAARRL  
PTPGDAGALNAWCMTPVPCAVADLLGFDDTQLDDIAGLVVDFVAALSPLSDAVALARASD  
AARQLLDRMTARVAQSHAHGDTLVAAVQQAARVSGWQASGGLVANLVGLLSQTCEATAAW  
LGNTLVAWSGDASASAARVVPDDAALDAFVAEVGRFDSVPVQNTRRFVASRTTIEGVTV  
GDAILVVLAAANRDPVHRDPHREMPGRAAGPNFGFGTGPHGCPGERIARAVTAGAFGAW  
LRAGGVAPHDGLAWDYRASTNVRMPKFDAAR

>Bcep18194\_B1689|KEGG|CYP212A7|[Burkholderia lata]bur|BP



MSRDLLGTLAGWQRTYGDVVHLRVRPEHAVVVTDPALVRELLVTHHDALGRWERAIRVFA  
QVHGHSVLVAEGDAWRDKRQALQPNFMPKPVQAFVPSIAATAGHALAQWPARDPDWPIES  
ALTSLAMDVIMRTMFSDAIGDDARAAEEAVRTVSAAANADFYWPASTPDWVPWKRGKARA  
MAVLNGLIDRQLHARLDLPARAWPDDLLSRLRLHRDDARRWPLQAVHDECMTAFLAGHE  
TTAGALTWWAWCMATNPAAQAAARDEVSRVLGGCAPSAETRSSLRYLTHTLEETLRLYPS  
APILISRRASRPVILGPWQFPARTLFMLPLQLMQRDARWFAEPDVFRPERFADGAPAAPR  
GTYPFPGTGPRVCLGQHLAMTEMTVVAAMILQRYELSAQPGMMPPRPVLNVTLRPERLLH  
LAIAPAADGGTV

>Bcep18194\_C6803|KEGG|CYP102J1|[Burkholderia lata]bur|BP

MKSSSLVPQPPLKPVIGHLMEVLGSPSLAKMMDLARTYGPVYWFEVFGQGYVVSQGTLV  
DEVCDETRQKCVHQSLLELRPAIGDGLFTAFGDEPNWAKAHRVLMQAFGPLSIWSMFDK  
MVDIADQMFLHWERFGPETPVDVSDHMTRLTLDTIALCAFDRCFNSFYREDQHFPVDAMV  
NTLSEAGKRELRPKLVSKLMVKRSRQFDADIEVMRSLATKMIEDRRKNPHVNEESMDLLD  
RMLNGIDPVTGEKLDDENIVFQMITFLIAGHETTSGLLSFATYFLLKNPDILQKARDMVD  
EVVGSETPRIEHLARLRYVEQILMETLRIWPTAPGFAVKPLADTTFGGKYAVSPDDIIMI  
LTPMLHRDVS VWGEDVEAFRPERFAPENAEQLPPNSWKPFNGARACIGRPFAMQEHLV  
LIMLLQRFD FSFADPDYELDVAETLT LKPAGFRVNVKPRARGALKVPDTALHARSNAQSP  
SVAPVQSIAPGEDLSNLLVLFGGNTGSAESFARRIAGDASRHGFHATCAPLDDFAGKLGG  
YPAIVIVTASYEGQPPDNAKS FVPYVEALDEGALDGVHFSVLGCGNKQWARTYQAI PKRV  
DEALEKAGATRVHFRGELDSGGDF FGEFDRWYTEMWNRFAISAGKEIPVIQHDDVALKVS  
FAGSSREKVLNLGDMAHASIVDNRELVDISVAGSRSKKHIELKLPEAMTYRSGDYLA VLP  
RNAKNNVDRVLRFRVSWDTQVVIEGTSSNPRLPLGQAIGCGELFSSYVELAVPATRSQV  
SSLAAATRCPPKEKVELERLSADGFECEILGKRRTVMDLLERFGSVDLSLEKFLDMLPALK  
ARQYSISSSPLWKADHVTLTVAVVDAPALSGNGRHEGVASSYLARLNTGDSLSVAVRPSN  
ARFRPPAEPDLPILICAGSGIAPFRGFLQERALQKQRGENVGTSLLFFGIDDPDVDFLY  
RDELDEWARCGVVEVMPAYS NRPEEGARFVQDKVWLERERISALFSQGATVFVCGDGKNM  
APAVRATLGRIYQETTGENDESASAWIDTMEREHGRYVADVFA

>Bcep18194\_C7583|KEGG|CYP1135B1|[Burkholderia lata]bur|BP

MKHRIDTYRDAEKTMKDKTLRQAMYDPALFFMKD TVVNLHGDAHLRKRQALNSLFTREFF  
RDYQNRVLPAA LDQVLKPVVAEGRGDVAILAFQALVNLTSDVTGIDRVGTEEEETNRILKI  
IRGLAHVSTVEQLLSGSVDDANRKIREALVEFERDFYVPSARRRQALIDQGAELPKDVMT  
VMLVNYPNGELPHDVMVKDAALFLLASAATQANTLCFIMLDILTWC RDHPGTRETLLAEP  
ATLQKFIWEAIRLHPPQVVSLRRASCPMHIPDGGEVAAGDVIEFDMATANRNPDI FGPD  
DTFNPYRVPPGRIAAPGLSFGAGPHACVGRVLAAGVPITAENADNEDTEFGTLHMITHAL  
LELGVDLDRDHPPIVDEATVRRHIVSLPFVLRPELAAAAGREVAGGGCPFTRS

>Bcen\_3450|KEGG|CYP229F2|[Burkholderia cenocepacia]bcn|BP

MNPTDPIAAVTHRDPYPYAAALVDGPPLAFDATLGLWVASRAAAVTAVLCHPACRVRPLD  
APVPPALRGTTAGALFGELVRMNDGASRHDV PKQALRAAFAPIDTEALRDRAEVLAARRL  
PAPGDADALNAWCMTVPVCAVADLLGFDETQLDDIAARVVEFVAALSPLSDAAALARASD  
AARHLLDRMTERVAQSRHDGTLVA AVQQADRASGWHASGALVANLVGLLSQTCEATAAW  
LGNALVAWNGDVGD SGGVPDAVALDAFVAEVGRFDTPVQNTRRFVAARTTIEGVSVEAGD  
AILVVLAAANRDP AVHRDPHRLTPGRPAGPNFGFGTGPHGCPGERIARAVTAGAFAARLR  
AGGWPPRDALKWDYRASTNVRMPKFDANR

>Bcen2424\_4916|KEGG|CYP229F2|[Burkholderia cenocepacia]bch|BP

MNPTDPIAAVTHRDPYPYAAALVDGPPLAFDATLGLWVASRAAAVTAVLCHPACRVRPLD  
APVPPALRGTTAGALFGELVRMNDGASRHDV PKQALRAAFAPIDTEALRDRAEVLAARRL  
PAPGDADALNAWCMTVPVCAVADLLGFDETQLDDIAARVVEFVAALSPLSDAAALARASD  
AARHLLDRMTERVAQSRHDGTLVA AVQQADRASGWHASGALVANLVGLLSQTCEATAAW  
LGNALVAWNGDVGD SGGVPDAVALDAFVAEVGRFDTPVQNTRRFVAARTTIEGVSVEAGD  
AILVVLAAANRDP AVHRDPHRLTPGRPAGPNFGFGTGPHGCPGERIARAVTAGAFAARLR  
AGGWPPRDALKWDYRASTNVRMPKFDANR

>Bcenmc03\_5370|KEGG|CYP229F2|[Burkholderia cenocepacia]bcm|BP

MNPTDPIAAVTHRDPYPYAAALVDGPPLAFDATLGLWVASRAAAVTAVLCHPACRVRPLD  
APVPPALRGTTAGALFGELVRMNDGASRHDV PKQALRAS FAPIDTDALRDRAEVLAARRL

PASGDADALNAWCMTVPVCAVADLLGFDETQLDDIAARVVEFVAALSPLSDAAALARASD  
AARHLLDRMTERVAQSRAHDGTLVAAVQQAARVSGWHASGALVANLVGLLSQTCEATAAW  
LGNVLVAWNGDVGDSSGVPDAAALDAFVAEVGRFDTPVQNTRRFVAARTTIEGVSVEAGD  
AILVVLAAANRDPVHRDPHRLTPGRPAGPNFGFGTGPHGCPGERIARAVTAGAFAARLR  
AGGWPPRDALKWDYRASTNVRMPKFDANR

>Bcenmc03\_5892|KEGG|CYP1484A1|[Burkholderia cenocepacia]bcm|BP

MTPMFDETLAHKTLFALLTDATDDRDFAFYDAMPALPGAYRDVSGTWMVGRYRLACAVLDH  
PALTTRSPLVECDVVRDEAGLLDTMLFADDSMHERMRKTFAPLFAKPRLAALRTHLASDL  
DALLEQIPDPRRFDLVEHLAQRLPALAACRLLGIDPVHAPRLQAQSMGPIRLISAMPIGP  
ADHALAVAQTRRFVDELDVHLDTVCAVLQAGGTRPALARRQLLANVLLTFIAGYGTMLS  
LGNTFAQALARLDLWQALVQEPRRVPLALRELMRIEPAVHVMIRFARADVELDGLRMAKG  
DVVAVVAAAANRDPGEFAAPGDIRLDRAHGGLVFGAGSHGCLGAALARMQLAVVFETLLA  
RMPGLMLEPGAHPRLQEGAFRGYRSLRVYDAARA

>Bcenmc03\_6858|KEGG|CYP101N1|[Burkholderia cenocepacia]bcm|BP

MSAVGHGATPEQAPVPSHVSPERVFDIDYHPPGAEGDYHLSLKKLHAEGIPDIFWTPRN  
GGHWVATRGGDDIYNILKDYENFSSKQLTVPLVEHQPLPPIFFDPPQHTAYRALIAPAFMP  
QAIGKLEEKARELAIELIEDFYPAGEVEFVSRFAQHLPIAIFMNMVALPAEDREYLLGLA  
DKMVRPVDANEKLAALGAIFQYLGAKIAERRANPGDDLISKIVNSTIDGRALTDDEVRL  
CGLVLIGGLDTVASAMGFIANFLAGSPAHRKQLIDNPALTQKAVDELLRRFPVQNQGRRI  
THDFEYKGVQLKAGDMIILPTTLHGLDERKFEDPLTVDFSRTPIHSTFGNGPHRCPGSF  
LARVELKVFLQEWLKRIPDFQVKPGAKAGVHGGVNGTLYYLPLVWKVTR

>Bcenmc03\_6889|KEGG|CYP1111A3|[Burkholderia cenocepacia]bcm|BP

MAGALRLEDFFDDSTFNPFEDSLAYGSDINPYPRIAELREKGTVQEGDYRVLMGGAADLT  
MSDVAHYCVFGYDEVSHVLGDPATFSNKS YERNLGISFGRSISTMDAPEHPRYRRIFQKA  
FLPHTVAAWGDTLVDPVVSELMSKFVDRGHADLVNEFTLHYPFNI IYRQLALPPEDVKIF  
HKLAI AQTLV SIDVAHGMEASTKLGAYFAKLIDRRRTPGDDLVSMLATAEVEGERLPDE  
VVISFLRQLVNAGGDTTYRATSVLLLLALLRNPEQLEAVRNDRTLVAQAIEEALRWDPVL

MQSRMATRDVTLGGVEIPAGAFLDVVAGSANRDPSPRFPDPDKFDIYRKPAHRHFAFAYGP  
HVCIGQHLARVEMTRALNAILDRLPNLRLDPGAPAPEINGIMMRVPHSIPVVFG

>Bcenmc03\_6896|KEGG|CYP101F1|[Burkholderia cenocepacia]bcm|BP

MEGDTKMNRAKDWTVPDHPRELVDVDFDYMAPPGAQDDVHLAWKSLHAGPDIVWSPYYGG  
HWIATRGEDIEAMQKDHTRFSHRNVNIPPNNEMQIVPLELDPPEHTAYRNLITPAFLPQA  
IASLENDVRSLAVELLDKIAPRGECEFVAEFAKILPIVIFLRLAELPVSDREQLEWAEW  
AVRGDFERRNDSQRALVGYISTWVEKRKADAGGDLVSLIANAQIEGKLISQERMFGMFIV  
VLFGGLDTVASMMGFARFLAENPAHRRQLIENPELMVSSVDELIRRFVANTARLITQD  
MEYKGIRFRKGDQIQLPNALHGLDDRKFSNPLAVDLTRKPVIHAAFGNGPHRCPGSFLAR  
TEIKVFLQEWLKRIPDFHIREGDKPRCGSGSVNGMLYLPLAWDVAP

>BCAM2153|KEGG|CYP229F2|[Burkholderia cenocepacia]bcj|BP

MNPTDPIAAVTHRDPYPYAAALVDGPPLAFDATLGLWVASRATAVTAVLGDPACRVRPLD  
APVPPALRGTTAGALFGELVRMNEGASRDVDPKQVLRAAFAPLDPALRDRAEVIAARRL  
SAPGDADALNAWCMTVPVCABAELLGFDETQLDDIAARVVEFVAALSPLSDAAALARASD  
AARQLLDRMTERVAQSHAQDGTLVAAVQQAARASGWQAGGALVANLVGLLSQTCEATAAW  
LGNALVAWNGEAREVPDAAAIDAFVAEVGRFDSVPQNTRRFVAARTTIEGVSV EAGDAIL  
VVLAANRDP AVHREPHRLMPGRTAGPNFGFGTGPHGCPGERIARAVTAGAFAARLHAGG  
WPPRDALKWDYRASTNVRMPKFDASR

>BCAM2591|KEGG|CYP116B109|[Burkholderia cenocepacia]bcj|BP

MSAIEHHASSKCPFHPPAPAAATAPNGCPVSAAAAAFDPFDDGYQQDPPEYVRWAREREPEV  
FYSPKLGWIVTRYDDIKAIFRDNLTFSPSIALEKITPTGAEANAVLASYGFA LNRTL VN  
EDEPAHMPRRRALLD PFTPEALKRHEPMVRRLAREYVDRFIDDGRADLVDQMLWEVPLTV  
ALHFLGVPEEDMDTLREYSIAHTINTWGRPKPEEQVAVAHAVGKFWQFAGKVLDKMREDP

SGPGWMQYGIRKQKTLDPDVTDSYLHSMMMAGIVAAHETTANATANAMKLLLQHPDAWRD  
ICDDPSLIPNAVEECLRHNGSVAAWRRLATKDVTIGGVAVPAGSKLLIVTSSANHDEARF  
ADADLFDIRRENASDQLTFGYGSHQCMGKNLARMEMQIFLEEFTRRLPHMKLAEQRFTYV  
PNTSFRGPEHLYVEWDPAANPERRDPSALRARTAVRIGEPSSHAVSRVVKVQRVSRCADR  
VAQVRLVSGDGRMLPRWTPGAHIDVICGDTGITRQYSLCGDPAERDAYEIAVLHEAQGRG  
GSAWVHANLRAGDVLKIRGPRNHFRFATDAGKAIFVAGGIGITPISAMAREAKVRGIDYE  
IHYSGARRASMLLDALTALHGERLHVYVSDEGSRNDFRALFAQPADDTRIYACGPARM  
DALEASCAHWPRDALRVEHFVSTRAALDPSKERPFLEVELKDSGITLTVAANQTVLDALQH  
ANIDVQSDCREGLCGSCEVRVLAGRVDHRDSVLTRAERDAHDRMMTCCSRACGGERLVLE  
L

>DM39\_4072|KEGG|CYP1487A1|[Burkholderia cenocepacia]bcen|BP

MNSSVQTNGEAGRCPFHSAFDPLEPAQIADPFPILAKMREESPVFYMEKYDLWVVTRED  
VLAVYKDMVSFSNGNAHKPLSPKSQAVIDRVGEDWPLPVDGSLNAMDPPEHLPLKRLFMS  
VFHKALPGMDEWLDEKLNNLVDRFVDAGEADLVPTFFWPTTVGAVAHLIGAADSETERFN  
EWAENWFELTGSTLLSPERAECWMAFIDFEQWAYALLEARRLNPQHDLSKLI EAQQSG  
AAITDRQIVTNMVGMAAGTDTTANTIAQMIYTLLKHPDQLQRVRENPELRPQMIEEIIR  
LRLPIRGVVRTMTQDVEMSGVTLPKGAKVYIHLGSANHDSSMFANPDEFDIERTNAHKHV  
SFGAFNRACVGAPLARLEIAKALDIILDRLPGLRLVDESEQLRYTESMIVPSLKSLRVRW  
DVPRKTV

>DM39\_5695|KEGG|CYP229F7|[Burkholderia cenocepacia]bcen|BP

MNPTDPIAAVTHRDPYPYYATLVDGPPLAFDASLGLWVASRAASVAAVLGHPVCRVRPLD  
MPVPPALRGTTAGALFGELVRMNDGALRHDVPKQALRTALASVDARALRDRAARIAAGRL  
PARLDADALNAWCMTTPVCVAAQQLGFDESQLDGIAASVVDVFVAALSPLSDAAALARASD  
AARQLLDRMTERVANAHQAQDGLVDAIRQAARETGWHASGALVANLVGLLSQTCEATAAW  
LGNAVVAWHQTNGAAETARDDAALDAFVAEVGRFDSVPVQNTRRFVAARTTIEGTSVEAGD  
AILVLVLAANRDPVHRDPQRLMPGRTAGPNFGFGTGPHACPGERIARAVTVGAFGALLR  
AGGGPPRDALKWGYRASTNVRMPKFARP

>DM40\_4874|KEGG|CYP229F1|[Burkholderia cenocepacia]bcen|BP

MNPTDPIAAVTHRDPYPYATLVDGPPLAFDAALGLWVASRAASVTAVLGHPACRVRPLD  
APVPPALRGTTAGALFGDLVRMNDGALRHDVPKQALRAAFAPLDADALRERAARLAGDRL  
RAPHDAHALNAWCMTVPVCAVADLLGFDDAQLDDIAAWVDFVAALSPLSDAAALAQASE  
GARHLLDRMTERVAHTRAQDGSILVAAVQQAARAAGWHASGALVANLVGLLSQTCEATAAW  
LGNVLVAWDTTKPGGARAMPDAAALDAFVAEVGRFDAPVQNTRRFVASRTMIEGVTVDAG  
AAILVVLAAANRDP SAHRDPHRLLPARAPGPNFGFGTGPHGCPGERIARAVTAGAFGAWL  
RAAGHEPRDRLVWDYRASANVRMPKFMPAR

>I35\_5939|KEGG|CYP102J5|[Burkholderia cenocepacia]bceo|BP

MFDKMVDIADQMFLYWFERFGPETAVDVSDHMTRLTLDTIALCAFDRCFNSFYREDQHPFV  
DAMVNTLSEAGKRELRPKLVSKLMLNRSRKFDADIELMRSLATKMIEDRRKNPHDNEEAM  
DLLDRMLNGVDPVTGEKLDDENIVFQMITFLIAGHETTSGLLSFATYFLLKNPDVLQRAR  
DMVDEVVGN DTPRIEHLARLRYIEQILMETLRIWPTAPAFAVTPLADTKFGGKYPVSPND  
IIMILTPMLHRDVS VWGDDVEAFRPERFEPENAEKLPPNSWKPFNGGARACIGRPFAMQE  
AHLVLIMLLQRFDFS FADPNYELQVAETLTLKPTGLRINVRPRARGVRKVSNDNLRVRAS  
IETPNVDQAPAVSDKDASKMLVLFGGNTGSSES FARRIAGDAGRHG FHATCAPLDAFAGK  
IDGFPAIVVVTASYEQPPDNAISFLPYIEAMSEGALDGVKFSVLGCGNKQWARTYQAIP  
KRVDAAFEKAGATRVHARGELDSGGDFFGEFDRWYAE LWNRF AISFGKDT SVAQNNNAAL  
NVSFLNNVREKLLSVDDMTHATVIDNRELVDI SAPGSRSKKHME LKLPETMTYRSGDYLA  
VLPRNSKRNVDRVLRFRLSWDTQVVIDGTSSNPR LPLGQAISCGELLSSYVELAVPATR  
SQVSILATATRC PPEKVDLERLSTGDFECEILEKRTTVMDLLERFGSVDLSFDKFLDMLP  
ALKARQY S I S S S P L W K A D H V T L T V A V V D A P A L S G N R H E G V A S S Y L A R L D A G D S V S V S V R  
P S N A R F R P P A E S N L P M I L I C A G S G I A P F R G F L Q E R A I Q K Q R G E N V G P S L L F F G I D D P D V D  
F L Y R D E L E E W A N L G V V E V M P A Y S N R P E E G A R F V Q D K V W L E R E K I A A L F A Q G A T V Y V C G D G  
K N M A P A V R A T L G R I Y Q D S T G A N D E S A H A W I D T M E R E H G R Y V A D V F A

>I35\_6489|KEGG|CYP116B109|[Burkholderia cenocepacia]bceo|BP

MSAIEHHASSKCPFH PAPAAATAPNGCPV S A A A A A F D P F D D G Y Q Q D P P E Y V R W A R E R E P V  
F Y S P K L G Y W I V T R Y D D I K A I F R D N L T F S P S I A L E K I T P T G A E A N A V L A S Y G F A L N R T L V N  
E D E P A H M P R R R A L L D P F T P E A L K H H E P M V R R L A R E Y V D R F I D D G R A D L V D Q M L W E V P L T V

ALHFLGVPEEDMDTLREYSIAHTINTWGRPKPEEQVAVAHAVGKFWQFAGKVLDKMREDP  
SGPGWMQYGIRKQKALPDVITDSYLHSMAGIVAAHETTANATANAMKLLLQHPDAWRD  
ICDDPSLI PNAVEECLRHNGSVAAWRRLATKDVITIGGVAVPAGSKLLIVTSSANHDEARF  
ADADLFDIRRENASDQLTFGYGSHQCMGKNLARMEMQIFLEEFTRRLPHMKLAEQRFTYV  
PNTSFRGPEHLYVEWDPAANPERRDPSALRARTAVRIGEPSSHAVSRVVKVQRVSRCADR  
VAQVRLVSGDGRMLPRWTPGAHIDVICGDTGITRQYSLCGDPDERDAYEIAVLHEAQGRG  
GSAWVHANLRAGDVLKIRGPRNHFRFATDAGKAIFVAGGIGITPISAMAREAKARGIDYE  
IHYSGARRASMLDTLAALHGERLHVYVSEEGSRNDFRALFAQPADDTHIYACGPARM  
DALEASCAHWPRDALRVEHFVSTRAALDPSNERPFLEVELRDSGITLTVAANQTVLDALQH  
ANIDVQSDCREGLCGSCEVRVLAGRVDHRDSVLTRAERDAHDRMMTCCSRACGGERLVLE  
L

>Bamb\_4351|KEGG|CYP229F1|[Burkholderia ambifaria]bam|BP

MNPTDPIAAVTHRDPYPYATLVDGPPLAFDATLGLWVASRAASVTAVLGHPACRVRPLD  
APVPPALRGTTAGALFGE LVRMNDGALRHDV PKQALRAACAPIDAGALRERAAQLAGSRL  
RAPHDADALNAWCLSV PVCADLLGFDEMQLDDIAALVVDFVAALSPLSDAAALARASD  
AARQLLDRMTERVARTRAQDGSWVAIQQAAGWHASDALVANLVGLLSQTCEATAAW  
LGNVLVAWDG TKDDAAEGERAMPDTAALEAFVAEVGRF DSPVQNTRRFVASRTTIEGVT  
DAGAAILAVLAAANRDP AVHREPHRLLPGRAPGPNFGFGTGPHGCPGEQIARAVTAGAFG  
AWLRAGGEAPRDRLVWDYRASTNVRMPKFGPAR

>BamMC406\_4867|KEGG|CYP229F1|[Burkholderia ambifaria]bac|BP

MNPTDPIAAVTHRDPYPYATLVDGPPLAFDATLGLWVASRAASVTAVLGHPACRVRPLD  
APVPPALRGTTAGALFGE LVRMNDGALRHDV PKQALRAACAPIDAGALRERAAQLAGSRL  
RAPDDADALNAWCLSV PVCADLLGFDEMQLDDIAALVVDFVAALSPLSDDAALARASD  
AARQLLDRMTERVARTRAQDGSWVAIQQAAGWHASGALVANLVGLLSQTCEATAAW  
LGNVLVAWDGTTDDAADGERAMPDTAALEAFVAEVGRFDAPVQNTRRFVASRTTIEGVT  
DAGAAILVLAAANRDP AVHREPHRLLPGRASAPNFGFGTGPHGCPGERIARAVTAGAFG  
AWLRAGGEATRGKLVWDYRGSTNVRMPKFGPAR

>BMULJ\_05568|KEGG|CYP116B113|[Burkholderia multivorans]bmj|BP

MSVTQRDASSSQCPFHPAPAAAAAPNGCPVSAAAAAFDPFEDGYQQDPPEYVRWAREQEP  
VFYSPKLGWVTRYDDIKAIFRDNLTFSPSIALEKITPTGPEANAVLASYGFALNRTL  
NEDEPAHMPRRRALDLPFTPDAKHHHEPMVRRLAREYVDRFIDDGHADLVDQMLWEVPLT  
VALHFLGVPEEDMDTLREYSIAHTINTWGRPKPEEQVAVAHAVGKFWQFAGKVLDKMRED  
PSGPGWMQYGIRKQKELPDVITDSYLHSMMAAGIVAAHETTANATANAMKLLLQHPDAWR  
DICEDPSLIPNAVEECLRHNGSLAAWRRLATKDVTIGGVDIPAGAKLLIVTSSANHDEAR  
FADADLFDIRRENASDQLTFGYGSHQCMGKNLARMEMQIFLDEFTRRLPHMKLAEQRFTY  
VPNTSFRGPEHLYVEWDPALNPERRDRSVLRPRAAVRIGEPSSHAVSRAVKVERVSICAD  
RVAHVRLVSADGRPLPRWTAGSHIDVICGDTGITRQYSLCGDPDERDAYEIAVLHEAQSR  
GGSAAVHANLRAGDVLKIRGPRNHFRFVTDAGKAI FVAGGIGITPISAMAREAKARGIDY  
EIHYSGARASMAMLDTLAALHGERLHVYVSEEGTRNDFHALFAQPADDAHIYACGPARM  
LDALDASCAHWPRDALRVEHFVSTKAALDPSKEQQFEVELKDSGITLTVAANQTVLDALQ  
HANIDVQSDCREGLCGSCEVRVLAGRVDHRDSVLTRAERDAHDMMTCCSRACGGERLVL  
EL

>BMULJ\_05578|KEGG|CYP117C1|[Burkholderia multivorans]bmj|BP

MLLNPLSRRVRMQQGMPVLPGAFFVVGHLPAVARALPDLLAYGERRWGTHFWLDMGAMGR  
MLVCTRPEAFELFNNKDVLDLLGDVAPAMRDTMATQDGELHRRTRAWANPSFQPQGLSA  
AKVGELFADIMMAWIRAWPARGTINLVDETSALTLTMI FRMLGIAEDDIATWETHYRHYA  
LVSLLPVDLPGTPLRRSRRAQVWIDARLSALVNELGRSPGDSGLLATLIRSPAAPDASSP  
ESNLLGNLRALIHAHKTTAVTMAHLAIRLAEQPDHWDALVAEARAAGTVPRNPSELARF  
PFAEALFLETLRSEPAFFPLVFRRTREIRIELGGRELAAGTRLIIPLILLSRAPSLYPQPD  
FLPQRWLEHRGAHKPIQTLQFGSGPHRCLGFHTACMQLVQFAVTLALVLDERKMRPQLVP  
QRTCGRRRFPINYPFRDTQVAFRSVSSNHDNRSEIPS



>BAG43225.1|NCBI|CYP1013A4|[Burkholderia multivorans]bmj|BP

MSRKAIAPGPRGSLVMGNLAAYKRNPVTMLLKLQQQYGDVVRNRLGPFVTHALAHPDGVQ  
HVLQDNHRNYVRGRFYDNFRMFFGDGLLTDDGEFWRRHRRVVQPLFHRKQVDAHAAAVGD  
AALALVEQWFARPDADAPFDVVEATMHVSLRMLGLMLFNADLSRHAHDVGPAVRFEGIEAM  
MPQGNLNDFVPRWMPTPFNRRIAHARRAIDTIVDAIVAHRAGRCAPSDVISLLLAARDP  
ETGAPLTEREVHDEVMTVLLAGHETTGSGMAWGLYALAQHPDVLRRRLRDELDAVLGGRAP  
APDDLRLPYLLQTVDEMLRVYPPIWGFTRDLVDDDEIGGYHVPAGSSVFLSPYVTHRHP  
ALWSHPDAFDPERFASHAPARHKYAYFFPGGGMRKCIGYQTALLQMRVLIAVVAQHVDLS  
TVPGQSLDTGATISLRPRDGIRMIKPRVRMHAAQRARTPRADARADACPFGGTRAPDAA  
PLTRDAQPQGGADDGRAVMQPHTTQTSHAASDASPVASPLASPAAGPVLPPDLLAHLRRV  
TGARTEHRAAPPDDAPPTRRFTWRAIEADPLPEMPAAALSGKRVAIVNGRASTVERVVSA  
LTRACAKAAVFAPPDGADAAAAAQTFVQHGPFDAIVDLGIEAAFALDAHDAWDAPLRRT  
IALHACYEDWSREESTSRFLYLAVTWMDGRMGYGDAPPVQPLGGLWAGLAKTLPQELPN  
CNVRVLDIAPDETGRAHALIARELYRGGREFIGHQGGRRYTLTAHDPLPADATPDWGPD  
DIVLFSGGARGIGLLAACALAKRCGCTVVVTGREPLPAGDEPWLALDEAGFRRYGFEQLR  
QATRSDTPKMIRQLRQLERRRDMHASLAAAAALGVPLQYRVCDVTDAAAVRALCDSLGA  
RLRAVVHNAGIDQPVRLPAKQADEFLGTVRVKVRGFMNLYAAVRDRAHVTGFFNVGSLTG  
RWGGMTGEADYAAANEALARLGLWARHDAHGRVVKTLVWPTWDGVMITHLAVTRRYVSP  
MRIDDGVRYWLEELADGRSGEAMYMGA VGRAVTPVQLRGFGPVDGLPNLHELATRALHAG  
EPRRFRPFARFSTHYRTVGAPYARAFRYDGRAAAPASLLEHARVAADWVAPPDGEFVAL  
HRIDDVTIRLDALSDTLASGDVHVDTDVAGGAADDGWRVHARCTTVGGRTVLEATFVYR  
RGTPARTTVVLPPDDCDAPAAPCAPVAWRGDLPAARWHGLLGQVRAAEPDALWQTLDP  
AGAPGAALWLPVNHLENTLRALFGAWPAERGLPHTWRIGRIDVGAPCADDAAELIVRYSGE  
RFAIADRAGARIAELRDTALVGDA PAGASAAEPVAAFD TNGGDGR

>Bmul\_1952|KEGG|CYP1013A4|[Burkholderia multivorans]bmu|BP

MSRKAIAPGPRGSLVMGNLAAYKRNPVTMLLKLQQQYGDVVRNRLGPFVTHALAHPDGVQ  
HVLQDNHRNYVRGRFYDNFRMFFGDGLLTDDGEFWRRHRRVVQPLFHRKQVDAHAAVGD  
AALALVEQWFARPDADAPFDVVEATMHVSLRMLGLMLFNADLSRHAHDVGPAVRFGEAM  
MPQGNLNDFVPRWMPTPFNRRIAHARRAIDTIVDAIVAEHRAGRCAPSDVISLLLAARDP  
ETGAPLTEREVHDEVMTVLLAGHETTGSMAWGLYALAQHPDVLRRRLRDELDAVLGGRAP  
APDDLRLPYLLQTVDEMLRVYPPIWGFTRDLVDDDEIGGYHVPAGSSVFLSPYVTHRHP  
ALWSPDAFDPERFASHAPARHKYAYFPFGGMRKCIGYQTALLQMRVLIAVVAQHVDLS  
TVPGQSLDTGATISLRPRDGIRMIKPRVRMHAAQRARTPRADARADACPFGGTRAPDAA  
PLTRDAQPQGGADDGRAVMQPHTTQTSHAASDASPVASPLASPAAGPVLPDDLHLRRV  
TGARTEHRAAPPDDAPPTRRFTWRAIEADPLPEMPAAALSGKRVAIVNGRASTVERVVSA  
LTRACAKAAVFAPPDGADAAAAAQTFAVQHGPFDIVDLGIEAAFALDAHDAWDAPLRRT  
IALHACYEDWSREESTSRLFYLAVTWMDGRMGYGDAPPVQPLGGLWAGLAKTLPQELPN  
CNVRVLDIAPDETGRAHALIARELYRGGREFEIGHQGGRRYTLTAHDPLPADATPDWGPD  
DIVLFSGGARGIGLLAACALAKRCGCTVVVTGREPLPAGDEPWLALDEAGFRRYGFEQLR  
QATRSDTPKMIRQRLRQLERRRDMHASLAAAAALGVPLQYRVCDVTDAAAVRALCDSLGA  
RLRAVVHNAGIDQPVRLPAKQADEFLGTVRVKVRGFMNLYAAVRDRAHVTGFFNVGSLTG  
RWGGMTGEADYAAANEALARLGLWARHDAHGRVVKTLVWPTWDGVMITHLAVTRRYVSP  
MRIDGVRWYLEELADGRSGEAMYGAVGRAVTPVQLRGFGPVDGLPNLHELATRALHAG  
EPRRFRPFARFSTHYRTVGAPYARAFRYDGRAAAPASLLEHARVAADWVAPPDGEVAL  
HRIDDVITRLDALSDTLDASGDVHVDTDVAGGAADDGWRVHARCTTVGGRTVLEATFVYR  
RGTPARTTVVLPDDCDAPAAPCAPVAWRGDLPAARWHGLLGQVRAAEPDALWQTLDP

AGAPGAALWLPVNHLENTLRALFGAWPAERGLPHTWRIGRIDVGAPCADD AELIVRYSGE  
RFAIADRAGARIAELRDTALVGDAPAGASAAEPVAAFD TNGGDGR

>Bmul\_3696|KEGG|CYP229F3|[Burkholderia multivorans]bmu|BP

MNPTDPIAAVTHRDPYPYAAALLDGPPLAYDASLGLWVATRAASVA AVLGH PACRVRPLD  
LPVPPALRGTSAGALFGELVRMNDGALRHQLPKQALHAALAQIDVQALRGRAATLAAAQR  
PALDDPDALNAWCIATPVRAVADLLGFDEPQLDDIAASVVD FVAALSPLSDAASLARASD  
AARQLLERMTVRVAQSHARDGTLVA AVKDAAAQAGWHASGALVANLVGLLSQTCEATAAW  
LANTIVAWHRQSAESASSADVPDDATLDAFVAEVARFDT PVQNTRRFVAARTTLEGVTL D  
AGAAILVVLAAANRDP AVHRDPHRFEPARTPGPDFGFGTGPHQCPGARIARAVTVGAFGA  
LLRAGGWPPREALKWDYRASANIRMPKFDAAR

>Bmul\_5948|KEGG|CYP117C1|[Burkholderia multivorans]bmu|BP

MLLNPLSRRVRMQQGMPVLPGAFFPVVGHLP AVARALPDLLAYGERRWGTHFWLDMGAMGR  
MLVCTRPEAFELFNKDV LADLLGDVAPAMRDTMATQDGELHRRTRAWANPSFQPQGLSA  
AKVGELFADIMMAWIRAWPARGTINLVDETSALT LTMIFRMLGIAEDDIATWETHYRHYA  
LVSLLPVDLPGTPLRRSRRAQVWIDARLSALVNELGRSPGDSGLLATLIRSPAAPDASSP  
ESNLLGNLRALIHA AHKTTAVTMAHLAIRLAEQPDHWDALVAEARAAGTVPRNPSELARF  
PFAEALFLET LRSEPAFPLVFRRTRE RIELGGRELAAGTRLI IPLILLSRAPSLYPQPD T  
FLPQRWLEHRGAHKPIQTLQFGSGPHRCLGFHTACMQLVQFAVTLALVLDERKMRPQLVP  
QRTCGRRRFPINYP PRDTQVAFRSVSSNHDNRSEIPS

>Bmul\_5958|KEGG|CYP116B113|[Burkholderia multivorans]bmu|BP

MARERIMSVTQRDASSSQCPFH PAPAAAAAPNGCPVSAAAAAFDPFEDGYQQDPPEYVRWAREQE PVFYSPKLG YWVVTRYDDIKAI FRDNLTFS P  
SIALEKITPTGPEANAVLAS YGFALNRTL VNEDEPAHMPRRRALLDPFTPDALKHHEPMVRR LAREYVDRFID DGHADLVDQMLWEVPLTV ALHFL  
GVPEEDMDTLREYSIAHTINTWGRPKPEEQVAVAHAVGKFWQFAGKVLDKMREDPSGPGWMQYGIRKQKELPDVITDSYLHSM MMAGIVA AHETTA  
NATANAMKLLLQHPDAWRD ICEDPSLIPNAVEECLRHNGSLAAWRR LATKDVTIGGVDIPAGAKLLIVTSSANHDEARFADADLFDIRRENASDQL  
TFGYGSHQCMGKNLARMEMQIFLDEFTRRLPHMKLAEQRFTYVPNTSFRGPEHLYVEWDPALNPERDRSVLRPRAAVRIGEPSSHAVSRAVKVER

VSICADRVAHVRLVSADGRPLPRWTAGSHIDVICGDTGITRQYSLCGDPDERDAYEIAVLHEAQSRGGSAAVHANLRAGDVLKIRGPRNHFRFVTD  
AGKAI FVAGGIGITPISAMAREAKARGIDYEIHYSGARRASMAMLDTLAALHGERLHVYVSEEGTRNDFHALFAQPADDAHIYACGPARMLDALDA  
SCAHWPRDALRVEHFVSTKAALDPSKEQQFEVELKDSGITLTVAANQTVLDALQHANIDVQSDCREGLCGSCEVRVLAGRVDHRDSVLTRAERDAH  
DRMMTCCSRACGGERLVLEL

>DM80\_293|KEGG|CYP1013A4|[Burkholderia multivorans]bmk|BP

MSRKAIAPGPRGSLVMGNLAAYKRNPVTMLLKLQQQYGDVVRNRLGPFVTHALAHDPDGVQ  
HVLQDNHRNYVRGRFYDNFRMFFGDGLLTDDGEFWRRHRRVVQPLFHRKQVDAHAAAVGD  
AALALVEQWFARPDADAPFDVVEAMMHVSLRMLGLMLFNADLSRHADDVGPAVRFGIAAM  
MPQGNLND FVPRWMPTPFNRRIAHARRAIDTIVDAIVAEHRAGRCAPSDVISLLLAARDS  
ETGAPLTEREVHDEVMTVLLAGHETTGSGMAWGLYALAQHPDVLRRRLRDELDAVLGGRAP  
APDDLRLPYLLQTVDEILRVYPPIWGFTRDLDVDDDEIGGYHVPAGSSVFLSPYVTHRHP  
ALWSHPDAFDPERFASHAPARHKYAYFFPFGGMRKCIGYQTALLQMRVLI AVVAQHVDLS  
AVPGQSLDTGATISLRPRDGIRMI AKPRARTHAAQSARTPRAGARADACPFGGARAPDAA  
PLARDMQPQGGADDGRAVMQPHAKQAPHAASDASPVASPPASPAAGPVLDPDELLAHLRRV  
TGASTEHRAPDDAPPTRRFTWRAIEADAVPEMPAGELSGKRVAIVNGRASTVERVVSA  
LTRACAKPAVFAPPDGADAAAAAQTFVQHGPFDAIVDLGIEAAAFALDAHDAWDAPLRRT  
IAL LHACYDDWSREESTSRIFYLAVTWMDGRMGYGDAPPVQPLGGLWAGLAKTLPQELPN  
CNVRVLDIAPDETGRVHALIARELYRGGREFIGHQGGRRYTLTAHDPLPADAAPDWGPD  
DIVLFSGGARGIGLLAACALAKRCGCTVVVTGRDPLPAGDEPWLALDEAGFRRYGFEQLR  
HATRS DTPKMIRQRLRQLERRRDMHASLAAAAALGVPLQYRVCDVTDATAVRALCDSLGA  
RLRAVVHNAGIDQPVRLPAKQADEFLGTVRVKVVRGFMNLYAAVRDRAHVTGFFNVGSLTG  
RWGGMTGEADYAAANEALARLGLWARHDAHGRVVKTLVWPTWDGVGMITHLAVTRRYVSP  
MRIDDGVRYWLEELADGRSGETMYMGAVGRAVTPVQLRGFGPVDGLPNLHELATRALHAG  
EPRRFRPFARFSTHYRTVGAPYARAFRYDGRAAAPASLLEHARVAADWVAPPDGE PVAL  
HRIDDVTIRLDALADTL DASGDVHVDTDVAGGAADDGWRVHARCTTVGGRTVLAATFVYR  
RGTPARTTVVLPPDDCDAPAAPCAPVAWRGDL LPAARWHGLLGQVRAAEPDALWQTL DPA  
AGTHGAALWLPVNHLENILRALFGAWPAARGLPHTWRIGRIDVGAPCADD AELIVRYSGE  
RFAIADRAGARVAELRDTALVGDAPAGAPAAEPVAAFD TNGGDGR

>DM80\_1416|KEGG|CYP195C1|[Burkholderia multivorans]bmk|BP

MSTTEMMARPTAPGSRFDLFDNLPDAYYRDPAPFYKALRDNEPLLWNSDGSVLLTRYDDVK  
AVWRDLSGRVNRAEAYAKKFEGEGPILLEHHTSSMLFRDPPDHDRLRDIVNPFFTPSSIERL  
RTAVREIVERLIEEVREKREIDFVAEFSSRIPIQVICDIFGVPRSDGPLIRDLAGAQLVFP  
LNPAVSAEAIAGHEATRKFKDYLSEHFNYWRRQPVEDMPTNIIISALVAAEKRGNPPISE  
VEMAHMCILVLNNGGHETTTNLIGLSTLALMKHPDQMAALLAKEPSVIGPGVEECLRYTTPL  
QLQGRRTTQEVQVPSGTIPADTEVIFAQVSANRDERVFADPDRLQLTRQPNHLAFGAGI  
HVCLGRPLARMEAAEALPALARHFPSMQLIDEPVFARSARFRGIQSMRVRLY

>DM80\_5078|KEGG|CYP229F3|[Burkholderia multivorans]bmk|BP

MNPTDPIAAVTHRDPYPYAAALLDGPPLAYDASLGLWVATRATSVAAVLGHPACRVRPLD  
LPVPPALRGTSAGALFGEFVLRMNDGALRHQVPKQALHAALAQIDVQALRGRAATLAAAQL  
PALDDPDALNAWCIATSVRAVADLLGFDEPQLDDIAASVVDVFAALSPLSDAASLARASA  
AARQLLDRMTVRVAQSHARDGLVAVVKDAAAQAGWHASGALVANLVGLLSQTCEATAAW  
LANTIVAWHRQSASSADVPDDATLDAFVAEVAREFDTPVQNTRRFVAARTTLEGVTLDAGA  
AILLVLAAANRDPVHRDPHRFVPARTPGPDFGFGTGPHQCPGARIARAVTVGAFGALLR  
AGGWPPREALKWDYRASANIRMPKFDAAR

>DM80\_6397|KEGG|CYP117C1|[Burkholderia multivorans]bmk|BP

MLLNPLSRRVRMQQGMPVLPGAFFPVVGHLPAVARALPDLLAYGERRWGTHFWLDMGAMGR  
MLVCTRPEAFELFNNKDVLDLLGDVAPAMRDTMATQDGELHRRTRAWANPSFQPQGLSA  
AKVGELFADIMMAWIRAWPARGTINLVDETSALTLTMIFRMLGIAEDDIATWETHYRHYA  
LVSLLPVDLPGTPLRRSRRAQVWIDARLSALVNELGRSPGDSGLLATLIRSPAAPDASSP  
ESNLLGNLRALIHAHKTTAVTMAHLAIRLAEQPDHWDALVAEARAAGTVPRNPSELARF  
PFAEALFLETLRSEPAFFPLVFRRTREIRIELGGRELAAGTRLIIPLILLSRAPSLYPQPD  
FLPQRWLEHRGAHKPIQTLQFGSGPHRCLGFHTACMQLVQFAVTLALVLDERKMRPQLVP  
QRTCGRRRFPINYPFRDTQVAFRSVSSNHDNRSEIPS

>AI071674.1|NCBI|CYP116B113|[Burkholderia multivorans]bmk|BP

MSVTQRDASSSQCPFHPPAPAAAAAPNGCPVSAAAAAFDPFEDGYQQDPPEYVRWAREQEP  
VFYSPKLGWVTRYDDIKAIFRDNLTFSPSIALEKITPTGPEANAVLASYGFALNRTL  
NEDEPAHMPRRRALLDPFPTDALKHHEPMVRRLAREYVDRFIDDGHADLVDQMLWEVPLT  
VALHFLGVPEEDMDTLREYSIAHTINTWGRPKPEEQVAVAHAVGKFWQFAGKVLDKMRED  
PSGPGWMQYGIRKQKELPDVITDSYLHSMMAHETGIVAAHETTANATANAMKLLLQHPDAWR  
DICEPDLIPNAVEECLRHNGSLAARRLATKDVITGGVDIPAGAKLLIVTSSANHDEAR  
FADADLFDIRRENASDQLTFGYGSHQCMGKNLARMEMQIFLDEFTRRLPHMKLAEQRTY  
VPNTSFRGPEHLYVEWDPALNPERDRSVLRPRAAVRIGEPSSHAVSRAVKVERVSICAD  
RVAHVRLVSADGRPLPRWTAGSHIDVICGDTGITRQYSLCGDPDERDAYEIAVLHEAQRS  
GGSAAVHANLRAGDVLKIRGPRNHFRFVTDAGKAIHVAGGIGITPISAMAREAKARGIDY  
EIHYSGARASMAMLDTLAALHGERLHVYVSEEGTRNDFHALFAQPADDAHIYACGPARM  
LDALDASCAHWPRDALRVEHFVSTKAALDPSKEQQFEVELKDSGITLTVAANQTVLDALQ  
HANIDVQSDCREGLCGSCEVRVLGRVDHRDSVLTRAERDAHDMMTCCSRACGGERLVL  
EL

>NP80\_4852|KEGG|CYP229F3|[Burkholderia multivorans]bmul|BP

MNPTDPIAAVMHRDPYPYAAALLDGPPLAYDASLGLWVATRAASVRAVLGHPACRVRPLD  
LPVPPALRGTSAGALFGELVRMNDGALRHQVPKQALHAALAQIDVQASRGRTATLAAAQL  
PALDDPGALNAWCIA TPVRAVADLLGFDESQLDLIAASVVDVFAALSPLSDAASLARASD  
AARQLLDGMTVRVAQSHARDGTLVSAVKDAAAEAGWHASGALVANLVGLLSQTCEATAAW  
LANAIVAWHRQSAESVSPADVPDDATLDAFVAEVARFETPVQNTRRFVAARTTLEGVTLD

AGAAILVVLAAANRDPVHRDPHRFVPARTPGPDFGFGTGPHQCPCGARIARAVTVGAFGA  
LLRAGGWPPREALKWSYRASANIRMPKFDAAR

>NP80\_5652|KEGG|CYP116B113|[Burkholderia multivorans]bmul|BP

MSVTERDASSSKCPFHPAPAAATAPNGCPVSAAAAAFDPFEDGYQQDPPEYVRWAREQEPVFYSPKLGWVTRYDDIKAIFRDNLTFSPSIALEK  
ITPTGPEANAVLASYGFAFNRTLNVNEDEPAHMPRRRALLDPFTPDALKHHEPMVRRALAREYVDRFIDDGHADLVDQMLWEVPLTVALHFLGVPEED  
MDTLREYSIAHTINTWGRPKPEEQVAVAHAVGKFWQFAGKVLDKMREDPSGPGWMQYGIRKQKELPDVITDSYLHSMMMAGIVA AHETTANATANA  
MKLLLQHPDAWRDICEDPSLIPNAVEECLRHNGSVAAWRRLATKNVTIGGVDIPAGAKLLIVTSSANHDEARFADADLFDIRRENASDQLTFGYGS  
HQC MGKNLARMEMQIFLDEFTRRLPHMKLAEQRFTYVPNTSFRGPEHLYVEWDPALNPERDRSVLRPRAAVRIGEPSSHAVSRAVKVERVSICAD  
RVAHVRLVSADGRPLPRWTAGSHIDVICGDTGITRQYSLCGDPDERDAYEIAVLHEAQSRGGS AWVHANLRAGDVLKIRGPRNHFRFATDAGKAIF  
VAGGIGITPISAMAREAQARGIDYEIHYSGARRASMAMLDTLAALHGERLHVYVSEEGTRNDFHALFAQPADDTHVYACGPARMLEASCAHWP  
RDALRVEHFVSTKAVLDPSKEQPFEVELKDSGITLTVAANQTVLDALQHANIDVQSDCREGLCGSCEVRVLAGRVDHRDSVLTRGERDAHDMTC  
CSRACGGERLVLEL

>GEM\_3522|KEGG|CYP229F1|[Burkholderia cepacia]bct|BP

MNPTDPIAAVTHRDPYPYYATLVDGPPLAFDATLGLWVTSRAASVTAVLGHPACRVRPLD  
APVPPALRGTTAGALFGE LVRMNDGALRHDVPKQALRAAFAPIDADALRERAAQLAGRRL  
RAPYDAAALNAWCLTVPVCAVADLLGFDDAQLDPIAGLVVDFVAALSPLSDAAALARASD  
GARQLLDRMTERVAHTRAQDGSLVA AIQQAARAAGWQASGALVANLVGLLSQTCEATAAW  
LGNALVAWDGTTADGAGAERAMPDAAALDAFVAEVGRFDAPVQNTRRFVASRTTIEGVTV  
EAGAAILVVLAAANRDPVHREPQRLLPGRAPGPNF GFGTGPHGCPGERIARAVTAGAFG  
AWLRAGGGPSRDRLVWDYRASTNVRMPKFVAGR

>GEM\_4303|KEGG|CYP212A9|[Burkholderia cepacia]bct|BP

MAAPVLHPPGVWPPGPRAGLTGWQLLRAMSRDLPGTLAGWQRAHGDVVHLRMWPEHAVVV  
TDPALVRELLVTHHDAFVRWERGIRVFSQVHG RSVLIAEGDAWRDKRHALQPNFMKPVQ  
AFVPAIAATAGHALAQWPARDAHWPVESALTSLAMDVIMRTMFS DAIGADARIAEEAVRA  
VSAAANAEFYQPASAPDWMPWKRGKARALAVLNGLIDRQLHARLDLPAHGWPDDL S RLL  
RLHRADAYAWPLRAVHDECMTAFLAGHETAAATLTWWAWNMAANPAAQAAARDEVVRLLA  
GRAPTADTRPALRYLTQTLEETMRLYPAAPILISRRALRPVVLGPWQFPARTLFMLPVQL

MHHDARWFPEPDAFRPERFAADAPTLPRGAYMPFGTGPRVCLGQHLAMTEMTVVAAMILQ  
RLVLAVPPGTPPPRPVLNVTLRPEQPLHLAIAPTGLTAVTVSA

>DM42\_5842|KEGG|CYP229F2|[Burkholderia cepacia]bced|BP

MNPTDPIAAVTHRDPYPYAAALVDGPPLAFDCTLGLWVASRATAVTAVLGDPAACRVRPLD  
APVPPALRGTTAGALFGELVRMNEGASRHDVPKQALRAAFAPLDPALRDRAEAI AARRL  
SAPGDADALNAWCMTVPVCAVADLLGFDETQLDDIAARVVEFVAALSPLSDAAALARASD  
AARQLLDRMTERVAQSHAQDGLVA AVQQAARASGWQAGGALVANLVGLLSQTCEATAAW  
LGNALVAWNGEAREVPDAAAIDAFVAEVGRFDSVPQNTRRFVAARTTIEGVSV EAGDAIL  
VVLA AANRDP AVHREPHRLMPGRTAGPNFGFGTGPHGCPGERIALAVTAGAFAARLHAGG  
WPPRDALKWDYRASTNVRMPKFDASR

>DM42\_5902|KEGG|CYP102J5|[Burkholderia cepacia]bced|BP

MKSSALVPQPPLKPIIGHLMEVLGSPSLAKMMDLARTYGPVYWFEVFGQGYVVSQGALV  
DEVCDSESRFQKSVHQSLLELRPAIGDGLFTAFSDPEPNWAKAHRVLMQSFGLSIWSMFDK  
MVDIADQMFLYWERFGPETAVDVSDHMTRLTLDTIALCAFD CRFNSFYREDQHFPVDAMV  
NTLSEAGKREL RPKLVS KLMLNRSRKFDADI ELMRSLATKMIEDRRKNPHDNEEAMDLLD  
RMLNGVDPVTGEKLDDENIVFQMITFLIAGHETTSGLLSFATYFLLKNPDVLQRARDMVD  
EVVGN DTPRIEHLARLRYIEQILMETLRIWPTAPAFAVTPLADTKFGGKYPVSPNDIIMI  
LTPMLHRDVS VWGDDVEAFRPERFEPENAEKLPPNSWKPFNGGARACIGRPFAMQEHLV  
LIMLLQRFD FSFADPNYELQVAETLT LKPTGLRINVRPRARGVRKVSNDNLRVRASIETP  
NVDQAPAVSDKDASKMLVLFGGNTGSSES FARRIAGDAGR HGFHATCAPLDAFAGKIDGF  
PAIVVVTASYEGQPPDNAISFLPYIEAMSEGA LDGVKFSVLGCGNKQWARTYQAI PKRVD  
AAFEKAGATRVHARGELDSGGDFFGEFDRWYAELWNRFAISFGKDT SVAQNNNAALNVSF  
LNNVREKLLSVDDMTHATVIDNRELVDISAPGSRSKKHME LKLPETMTYRSGDYLA VLPR  
NSKRNVDRLRRFRLSWDTQVVIDGTSSNPRLPLGQAISCGELLSSYVELAVPATRSQVS  
ILATATRCPP EKVDLERLSTGDFECEILEKR TTVMDLLERFGSVDLSFDKFLDMLPALKA  
RQYSISSSPLWKADHVTLTVAVVDAPALSGNGRHEGVASSYLARLDAGDSVSVSVRPSNA  
RFRPPAESNLPMILICAGSGIAPFRGFLQERAIQKQRGENVGPSLLFFGIDDPDVDFLYR  
DELEEWANLG VVEVMPAYS NRPEEGARFVQDKVWLEREKIAALFAQGATVYVCGDGKNMA  
PAVRATLGRIYQDSTGANDESAHAWIDTMEREHGRYVADVFA

>AK34\_3593|KEGG|CYP229F8|[Burkholderia dolosa]bd1|BP



MNLTPADPIAAVTHRDPYPYYATLVDGPPLAFDRTLGLWVASRAATVTAVLGDPACRVRP  
LDAPVPPALRGTTAGALFGELVRMNDGALRHDVPKHALRAALASFDANAFRDRATQVAAA  
RLRAPCDSDALNAWCLTVPVCAVADLLGFDDAQLDDIAALVVDFVAALSPLSDESALARA  
NDAARQLLDRMTERVARTKTRDGTLVAAVQQAARESGWHASGALIANLVGLLSQTCEATA  
AWLGNTLIAWAGTAHDGVAIERDAPNDAALDAFIAEVARFDSFVQNTRRFVASRTTIDGV  
TLEAGAAILVVLAAANRDPVHREPDRLLPGRPSGPTFGFGTGPHGCPGERIARAVTAGA  
FRAWLRAGGGVPRDALTWSYRASTNVRMPKFDVR

>ABD05\_24685|KEGG|CYP229F2|[Burkholderia pyrocinia]bpyr|BP

MNSNPNDPIAAVTHRDPYPYYAALVDGPPLAFDATLGLWVASRAAAVTAVLGHPACRVRP  
LDAPVPPALRGTTAGALFGELVRMNDGASRHDVPKHALRTALAPVDTGKLRDRAAQLAAR  
RLPAPGDADALNAWCMTVPVCAVADLLGFDETQLDDIAARVVDFVAALSPLSDAAALARA  
SDGARQLLDRMTERVAQTHAHDGTLVAAVQQAARASGWHASGALVANLVGLLSQTCEATA  
AWLGNSLVAWNGEAEARVAPDDAALDAFVAEVGRFDAPVQNTRRFVASRTTIEGVTVEA  
GDAILVVLAAANRDPVHRDPHRLMPGRAAGTNFGFGTGPHGCPGERIARAVTAGAFAAW  
LRAGGWPPRGGLTWNYRASTNVRMPTFDAAR

>ABD05\_28890|KEGG|CYP212A7|[Burkholderia pyrocinia]bpyr|BP

MNTRSSSQCPFHAGAAAPAPVLHPPGVWPPGPRAGLTGWGLLRKMSRDLIGTILSGWQREY  
GDLVHLRVWPEHAVVVTDPALVRELLVTHHDAFGRWERAIRIFAQVHGHSVLVAEGDAWR  
DKRHALQPNFMPKPVQAFVPAIAATAGHALAQWPARDPDWPIESALTSLAMDVIMRTMFS  
DTIGDDARAAEDAVRAVSAAADAAFYQFASPTDWMPWKRGKVRATAVLNGLIDRQLRARV  
DMPERTWPDDLRLRLHRADGRKWPLQAVHDECMTAFLAGHETTAGALTWWAWCMATN  
PAVQAAARDEVSRVLGGRAPSAETRSSLRYLTQTLDETTLRLYPSAPILISRRASRPVALG  
AWQFPARTLFMLPLQLMQRDPRWFPEPDFAFRPERFADDAPALPRGAYMPFGTGPRVCLGQ  
HLAMTEMTVVAAMILQRHVLSVPPGMAAPRAVLNVTLRPERALHLAIEPTGLAADTVSA

>NL30\_01690|KEGG|CYP229F2|[Burkholderia contaminans]bcon|BP

MNPTDPIAAVTHRDPYPYYAALVDGPPLAFDATLGLWVASRAAAVTAVLGHSACRVRPLD

APVPPALRGTTAGALFGELVRMNDGVLRHDPKQALRTAFAPIDPAALRDRAAQVAARLL  
PAPGDAGALNAWCMTVPVCAVADLLGFDETQLDGIAAQVVDVFAALSPLSDAAALARASD  
AARALLDRMTERVARTHAHDGTLVAAVQQAARASGWQASGALVANLVGLLSQTCEATAAW  
LGNALVAWHGEAGANAARVTPDDAALDAFVGEVGRFDSFVQNTRRFVASRTTIEGVTVEA  
GDAILVVLAANRDPVHRDPQRFMPGRAAGPNFGFGTGPHGCPGERIARAVTAGAFGAW  
LRAGGVPPHDGLAWDYRASTNVRMPKFDAAR

>NL30\_05370|KEGG|CYP212A7|[Burkholderia contaminans]bcon|BP

MNTRSTSSCPFHAGAAVAPVLHPPGVWPPGPRAGLTGWGLLRAMSRDLLGTLAGWQRAY  
GDVVHVRVWPEHAVVVTDPALVRELLVTHHDALGRWEAVRVFAQVHGHSVLI AEGDAWR  
DKRQALQPNFMPKAVQTFVPSIAATAGHALAQWPAHDPDWPIESALTSLAMDVIMRTMFS  
NAIGDDARAAEEAVRAVSAAANADFYWPASTPDWVPWKRGKARAMAVLNGLIDRQLHARL  
DLPARAWPDDLRSRLRLHRDDARRWPLRAVHDECMTAFLAGHETTAGALTWWAWCMATN  
PAAQAAARDEVSRVLGGCAPSAETRSSLRYLTHLTLEETLRLYPSAPILISRRASRPVLG  
PWQFPARTLFMLPLQLMQRDARWFDAPDVFRPERFADDVPAAPRGTYMPFGTGPRVCLGQ  
HLAMTEMTVVAAMILQRYALSAPPGGVPPRPVLNVTLRPDRPLHLAIAPAGERSA

>NL30\_16140|KEGG|CYP229F2|[Burkholderia contaminans]bcon|BP

MNPTDPIAAVTHRDPYPYAAALVDGPPPLAFDATLGLWVASRAAAVTAVLGHPACRVRPLD  
APVPPALRGTTAGALFGELVRMNDGALRHDPKQALRTAFAPIDTVALRDRVTQLAARRL  
PTPGDAGALNAWCMTVPVCAVADLLGFDDTQLDDIAGLVVDVFAALSPLSDAVALARASD  
AARQLLDRMTARVAQSHAHGTLVAAVQQAARVSGWQASGGLVANLVGLLSQTCEATAAW  
LGNTLVAWSGDASASAARVVPDDAALDAFVAEVGRFDSFVQNTRRFVASRTTIEGVTVEA  
GDAILVVLAANRDPVHRDPHREFMPGRAAGPNFGFGTGPHGCPGERIARAVTAGAFGAW  
LRAGGVAPHDGLAWDYRASTNVRMPKFDAAR

>NL30\_31780|KEGG|CYP102J3|[Burkholderia contaminans]bcon|BP

MKSSSLVPQPPLKPVIGHLM EVLGPSP LAKMMDLARKYGPVYWF EVFGQGYVVS GQTLV  
NEVCDESRFQKCVHQSLLELRPAIGDGLFTAFGDEPNWAKAHRVLMQAFGPLSIWSMFDK  
MVDIADQMFLHWERFGPETPVDVSDHMTRLTLDTIALCAFD CRFNSFYREDQH PFVDAMV

NTLSEAGKRELRPKLVSKLMVNRSRKFDADIEVMRSLATKMIEDRRKHPHDSEASMDLLD  
RMLNGVDPVTGEKLDDENIVFQMITFLIAGHETTSGLLSFATYFLLKNPDILQKARDMVD  
EVVGSETPRIEHLARLRYIEHILMETLRIWPTAPAFVKPLADTTFGGKYAVSPDDIIMI  
LTPMLHRDVS VWGEDVDAFRPERFAPENAEQLPPNAWKPFNGGARACIGRPFAMQEAHLV  
LIMLLQRFDFSFADPDYELEVAETLTTLKPTGLRINVKPRARSALKAPDTAVRARSSAQSP  
SVAPVQSLPSSSEDVSTMLVLFGGNTGSAESFARRIAGDASRHGFHATCAPLDDFAGKLDG  
YPAIVIVTASYEGQPPDNARSFVPYVEALEEGALAGVHFSVLGCGNKQWARTYQAI PKRV  
DEALEKAGATRVHVRGELDSGGDFGFEFDNWYTEMWDRFAISAGKEVSTVQHRDTALKVS  
FAENTREKLLNFGDMANASIVDNRELVNISVAGSRSKKHIELKLPEPTYQSGDYLA VLP  
RNSKNNVDRVLRRFRVSWDTQVVI EGTSSNPRLPLGQPI SCGDLFSSYVELAVPATRSQV  
STLAAATRCPPKEVELERLSADDFECEILGKRRTVMDLLERFGSVDL SLEKFLDMLPALK  
ARQYSSISSPLWKADHVTLTVAVVDAPALSGNGRHEGVASSYLARLNTGDSL SVAVRPSN  
AHFRPPAETGLPMILICAGSGIAPFRGFLQERALQKQQGENVGKSL LFFGIDDPDVDFLY  
REELDEWARCGVVEVMPAYSNRPEAGARFVQDKVWLEREKIAALFAQGATVFVCGDGKNM  
APAVRATLGRIYQEATGANDESASAWIDTMEREHGRYVADVFA

>BW23\_3354|KEGG|CYP229F4|[Burkholderia ubonensis]bub|BP

MNPTDPIAAVTHRDPYPYAAALVDGPPLAFDATLGLWVASRAATVSAVLAHPACRVRPLA  
APVPPALRGTTAGELFGQLIRMNDGVL RHDAPKRAMQAALASVDALALRRRTATLAAQRL  
PAHAAPDALNAWCMTVPVCAVAELLGFDDARLDDVAAWVADFVAALSPLSTAAQLAGASA  
AAGRLLDRMTEIVAATRADDGSLVA AVQCAAGEAGWHASGALIANLVGLLSQTCEATAAW  
LGNTVVAWLDPAKRPAGEPCAMDDATLDAFVAEVARFDAPVQNTRRFVAARTTLDGVTVD  
AGDAILVVLAANRDPAAQRDPHRFVPGRPPGPAFGFGAGPHGCPGERIARAVTVGAVGA  
LLRGGGLPPGDAPGWRYRDSTNVRMPKFEPAR

>BW23\_4825|KEGG|CYP169A2|[Burkholderia ubonensis]bub|BP

MSTDSTITTCPVKRLALRRKYWKLPDAGVNHWLDIQRDPLKWLADMHRTSPDLASLRM  
GVKQLWCLFHPDAIRELMVSHRADLRRWEPSLCIMRQWNGSSFMMKEGEAARRQRQTVRP  
HIQSPAVPEIQRIARHWSARIVPGQVVDLDLEMAAYSVTLAGHALFDIDLGPNAVTTAKA  
VRILSRVALLESSTGLPLGHWFP SKMCPRKRWALRVMRAQIEQVAQESQRPLAMHRDDLA

TLMMASHQATGATLAWAQLLLARHPEVLAALRTELAADWWSGVNQLQDLHRAPLLRAVIQ  
ETLRLYPPAYALVPRQLSRAMTVSGTPLRRGDIVMISSWITHRDARWFPEPEAFRPERFL  
EAPTWPQGAYFPFGVGDRACPGTGMAMMDLAVSLAYWIEHWDMTIVGPVTPQGWFSLRPK  
NARVRLEPRMRADREPNETPRR

>BW23\_5133|KEGG|CYP212A10|[Burkholderia ubonensis]bub|BP

MSRDLIGTLAGWRQTYGDVVHLRMWPEHAVVVTDLPQLVRDLLVTHHDALVRWERGIRVFG  
EVHGHSVLIAEGGAWRDKRHALQPGFMPKAVQGFVPTIAATAGHALAQWPAHDPRWP  
ALTSAMDVIVRTMFSDVIGDDARDAEAAVRTVSAAANAEFYQPWSAPDWMPPWKRRKARA  
SAVLNGLIDRQLHARLDVPDSAWPDDLLSRLRLHRANARTWPLRAVHDECMTAFLAGHE  
TTAATLTWWAWCMASNPAAQAAAREEVERVLGGRAPTARTRPLLRYLTQTLEETLRLYPA  
APILISRRALRPIALGGWQLPARTLFMLPLQLMHDDPRWFPEPHAFRPERFDEAGPAVPR  
GAYMPFGTGPRVCLGQHLATTEMTVIAAMLLQRFELKVPAGMAAPRSVLNVTLRPDRPLH  
LGIAAISPDVPKVPADRSVTASPASPTPE

>WI26\_20245|KEGG|CYP212A9|[Burkholderia diffusa]bdf|BP

MNTRSSSRCPFHADAAGAAPALHPPGVWPPGPRAGLTGWRLLRAMSRLDTGTLAGWQRAH  
GDVVHLRMWPEHAVVVTDLPALVRELLVTHHDALVRWERGIRVFSQVHGRSVLVAEGDAWR  
DKRHALQPNFMPKPVQAFVPSIAATAGHALAQWPAHDAHWPIESALTSAMDVIMRTMFS  
DAIGANARVAEEAVRTISAAANAEFYQPVSAAPDWMPPWKRGKARALAVLNGLIDRQLHARL  
DTPEHRWPDDLLSRLRLHRADARTWPLQAVHDECMTAFLAGHETVAATLTWWAWNMAAN  
PAAQAAARDEVVRVLGGRAPTADTRAALRYLTQTLEETMRVYPAAPILISRRALRPVALG  
AWQFPARTLFMLPIQLMHRDARWFPAPTAFRPERFADDAPAI PRGAYMPFGTGPRVCLGQ  
HLAMTEMAVVAAMILQRHELSPVPPGMAPPRATLNVTLRPERPLHLAIAPTRPAAEAGPS

>WS51\_04910|KEGG|CYP212A9|[Burkholderia territorii]btei|BP

MNTRSSSRCPFHADAAGAAPALHPPGAWPPGPRAGLTGWRLLRAMSRLDLGTLAGWQRAH  
GDVVHLRMWPEHAVVVTDLPALVRELLVAQHDALVRWERGIRVFSQVHGHSVLIAEGHAWR

DKRHAMQPNFMPKPVQAFVPSIAATAGHALAQWPAHDAHWP IESALTSLAMDVIMRTMFS  
DAIGANARVAEAAVRTISAVANAEFYQPANAPDWMPWKRGKARALAVLNGLIDRQLHARL  
DVPEHGWPDDLRSRLRLHRADPRTWPLQAVHDECMTAFLAGHETVAATLTWWAWNMAAH  
PAAQAAARDEVVRVLGGRAPTADTRAALRYLTQTLEETMRMYPAAPILISRRASRPVALG  
AWQFPARTLFMLPIQLMHHDARWFPEPAAFRPQRFGDDAPAI PRGAYLPFGTGPRVCLGQ  
HLAMTEMTVAAAMILQRHALSVPPGMAPPRATLNVTLRPERALHLAIAPTSPAANAAAS

>AOI65315.1|NCBI|CYP1013A3|[Burkholderia territorii]btei|BP

MSMKRLAPGPRGSVVMGNLA EYKRN PVTMLLKLQQQY GDIARNRLGPFLTHALAH PDGIQ  
HVLQDNHRNYVRGRFYDNFKMFFGDGLLTDDGEFWRRHRRVVQPLFHRKQVESHTAALGD  
AALALVERWLKRPAHEPFD AVEEMMRVSLRMLGLMLFNADISRHADDVGP AVRFGIAAMM  
PQGNLNDFVPRWMP TPFNRRIAHARRGIDAI VDAIVA EHRAGRCETS DVISLLLAARDPE  
TGAPLTEREVHDEVMTVFLAGHETT GSGMAWGLYALAQHPDVLRLRLRDELDAVLGGRAPD  
AADLERLPYLAQTVDEVLRLYPPIWGFTRDLVDDDEIGGYHVPAGSSVFMSPYVTHRHPA  
LWANPD AFDPENFGSHAPARHKYAYFPFGGGMKRCIGYQTALLQIRVLI AVVVQHVDLSA  
VPGHSLDTGATISLRPRDGIRLIAKRRSRERGGTGRAGADPGTPADRASVCPFSGAQQA  
QAQAQAPAPSPPTPSTAPPANAASPTP VRSAGPALAPDMLAFLQ RDPVTDEASPGADATPT  
HRFTWRPVEIEPLPDLPAEELSGKRIAIVNGLGRTVERVAATLTRACAKPSVFAPADGVD  
PATAASTFFVQSGPFDGIVDLGVETPFSLDVHDQWEAPLRRTVALLQACYGDWSQEASTS  
RLFYLALTWQDGLMGHGDDTLVQPLGGLWAGLAKTLPQELPNCNVRVLDIAPDETGRVDQ  
LIMRELYRWGRFEVGHRSRRHTLVAARDALPADAAPDWGADDVVLFSGGARGIGFLAAC  
ALAKRHRCTVIVTGRDALPAGDEPWLALDDAGFKRYGLEQLRQAAPGRSPKAIRD TLRQL  
QRRRELKASLDAVAALGLPVHYRVCDVTD AHAVRTLCD AFGDRLRGVIHNAGIDQPVRLS  
RKSAD EFIGTVRVKVLGFVNLYAAVRNRPRVGC FVNVGSLTGRWGGM TGETDYAAANEAL  
ARLGWWARRDAGARVVKTI AWPTWDGVGMITNLAVTRRYVTPMRI DEGVRHWLAELATPA  
TPTSSSGSGEPMYMGAVGRALTPIQLRGFDAVDGLPNLGELATRRHHAGTPRRFRPFSCFS  
TRYRTSGAPYTQAFRFDGRAAVPASL LLEHARVVADWVAPPGGERACLHEAVDITIALDA  
LADALDSHGDLALD TDANGRTAGDGWHVTVRCASLAGRVLLDATFVYRSHPPGGMTVALP  
RETEDAPARDAARARWRD DLLPEARWSGGIAQGKAADPAALWGVQDDAARATCPQLWL PV  
NHLENVLRVLLGARTADGEPPRAWRIGRIVFGAAQAGDADMLLRYPDDRFAIADRAGASI  
AELYDARLAGATDAQAVAAPDL

>WJ12\_27080|KEGG|CYP212A9|[Burkholderia seminalis]bsem|BP

MNPRTSSPCPFHAGAAAPAPVLHPPGVWPPGPRAGLTGWSLLRAMSRDLLGTLAGWQREH  
GDVVHLRMWPEHVAVTDPALVRELLVTHHDALVRWERGIRVFSQVHGHSVLVAEGDAWR  
DKRHALQPNFMPKPVQAFVPAIAATAGHALAQWPAHDARWPIESALTSLAMDVIMRAMFS  
DAIGEDARVAEAAVRTVSAVSNAEFYQPV SAPDWMPWKRGKARALAVLNGLIDRQLHARL  
DRPEHGWPDDLLSRLLRLHRADARVWPLQAVRDECMTAFLAGHETAAATLTWWAWSMAAH  
PDVQAAARDEVVRVLDGRAPSTDTRPALRYLTQTLEETMRLYPAAPILISRRASRPVALG  
AWQFPARTL FMLPLQLMHLDERWFPEPHA FRPARFADDAPPLPRGAYMPFGTGPRVCLGQ  
HLAMTEMTVVAAMLLQRYVLSVPPGTAPPRPVLNVTLRPRQALHLAIASPGLTAEASAQ  
GPA

>WS57\_03680|KEGG|CYP102J5|[Burkholderia pseudomultivorans]bpsl|BP

MKSSALVPQPPLKPIIGHLM EVLGPSP LAKMMDLARTYGPVYWFEVFGQGYVVSQGALV  
DEVCD ESRFQKSVHQSLLELRPAIGDGLFTAFSDEPNWAKAHRVLMQSFGLSIWSMFDK  
MVDIADQMFLYWERFGPETAVDVSDHMT RLTLDTIALCAFD CRFNSFYREDQH PFVDAMV  
NTLSEAGKREL RPKLVS KLMLNRSRKFDADIELMRSLATKMIEDRRKNPHDNEEAMDLLD  
RMLNGVDPVTGEKLDDENIVFQMITFLIAGHETTSGLLSFATYFLLKNPDVLQRARDMVD  
EVVGNDTPRIEHLARLRYIEQILMETLRIWPTAPAFAVTPLADTTFGGKYPVSPNDIIMI  
LTPMLHRDVS VWGEDVEAFRPERFE PENAEKLPPNSWKPFNGARACIGRPFAMQE AHLV  
LIMLLQRFD FSFADPNYELQVAETLT LKPTGLRINVRPRARGVRKVSNDNLRVRASIETP  
NVDQAPAVSDKDASKMLVLFGGNTGSSES FARRIAGDAGR HGFHATCAPLDAFAGKIDGF  
PAIVVVTASYEGQPPDNAIAFLPYIEAMSE GALDGVKFSVLGCGNKQWARTYQAI PKRVD  
AAFEKAGATRVHARGELDSGGDFFGEFDRWYAGFWNRFAISFGKDT SVAQSSNSALNVSF  
LNNVREKLLSVDDMTHATVIDNRELVDISVPGSRSKKHME LKLPETMTYRSGDYLA VLPR  
NSKRNVDRVLRRFRLSWDTQVVIDGTSSNPR LPLGQAISCGELLSSYVELAVPATRSQVS  
ILAAATRCPP EKVELERLSTGDFEYEILEKRTTVM DLLERFGSVDLSFDKFLDMLPALKA

RQYSSSSPLWKADHVTTLTVAVVDAPALSGNGRHEGVASSYLARLDAGDSVSVSVRPSNA  
RFRPPVESNLPMILICAGSGIAPFRGFLQERAIQKQRGENVGPSLLFFGIDDPDVDFLYR  
DELEEWANLGVVEVMPAYSNRPEEGARFVQDKVWLEREKIAALFAQGATVYVCGDGKNMA  
PAVRATLGRIYQDSTGANDESAHAWIDTMEREHGRYVADVFA

>WT74\_26050|KEGG|CYP212A19|[Burkholderia stagnalis]bstg|BP

MNTRSSSQCPFHAGAPTPALHPPGVWPPGPRAGLTGWGLLRAMSRDLLGALGGWQQAFGD  
VVHLRMWPEHAVAVTDPQLVRELLVTHHDAVARWERGIRVFSQVHGHSVLIAEGDAWRGK  
RHALQPGFMPKPVQSFASTIASTAGHALAQWPAHDPHWPIESALTSLAMDVIVRTMFSDV  
IGDDARAAEQAVRTVSAAANAIFYQPAIAPDWMPWKRAKARAQAVLNGLIDRQLHARLDK  
PDSAWPDDLLTRLRLHRADARAWPLRAVHDECMTAFLAGHETTAATLTWWTWCMA SNPA  
AQDAARDEVARVLGGRAPTETTRPALRYLTQTLEETMRLYPAAPILISRRASRPIALGGW  
QLPARTLFMLPIQLMHRDARWFPEPHAFRPERFADGAPAVPRGAYMPFGTGPRVCLGQHL  
AMTEMTVIAAMVLQRFVLSAPAGVAVPKPVLNVTLRPDRALHLGIAAVPA

>BBJ41\_20335|KEGG|CYP212A7|[Burkholderia stabilis]bstl|BP

MNTRSSSQCPFHAGTAAPAPVLHPPGVWPPGPRAGLTGWGLLRAMSRDLIGTLAGWQRAY  
GDVVHLRVWPEHAVVVTDPALVRELLVTHHDALGRWERAIRVFAQVHGHSVLVAEGDAWR  
DKRQALQPNFMPKPVQSFVPAIAATAGHAIAQWPASDPDWPIESALTSLAMDVIMRTMFS  
NAIGDDARAAEDAVRVVSAAANAIFYVPASTPDWMPWKRGKVRAMAVLNELIDRQLHARL  
DMPERIWPDDLLSRLRLHRADARRWPLRAVHDECMTAFLAGHETTAGALTWWAWCMATN  
PAAQAAARDEVARTLGGRAPSAETRSSLRYLTQTLDETLRLYPSAPILISRRASRPIALG  
AWQFPARTLFMLPLQLMQRDARWFPEPDAFRPERFAGDAPAAPRGAYMPFGTGPRVCLGQ  
HLAMTEMTVVAAMVLQRYVLSVPPGMTPPREVLNVTLRPERALHLAIAPTGLTADTVSA

>JFN94\_24295|KEGG|CYP212A9|[Burkholderia anthina]bann|BP

MNPRSSSRCPFAAGAAGASPALHPPGVWPPGPHAGLTGWRLLRAMSRDLTGALAGWQRAH  
GDVVHLRMWPEHAVVVTDPALVRELLVTHHDALVRWERGIRVFSQVHGHSVLVAEGDAWR  
DKRHALQPNFMPKPVQAFVPAIAATVGQALARWPAHDAHWPPIESALTSLAMDVIMRTMFS  
DALGADARVAEDAVRTVGAAANAIFYQPASVPDWAPWKRGKARALAVLNGLIDRQLRVRL

DLPAQDWPDDLLSRLLRLHRADTHAWPQQAVHDECMTAFLAGHETAAATLTWWAWNMAAH  
PVAQAAARDEVVRALGDRPPTADTRPALRYLTQTLEETMRLYPAAPILISRRAVRPVALG  
AWQFPARTLFMLPIRLMHHDARWFPEPHAFRPERFADDAPAI PRGAYMPFGTGPRVCLGQ  
HLAMTEMTVVAAMILQRHVLAMPSGTPPPRPVLNVTLRPEQPLHLTIAPTGPTAVMVSA

>JFN94\_28710|KEGG|CYP229F1|[Burkholderia anthina]bann|BP

MNPTDPIAAVTHRDPYPYYATLVDGPPPLAFDATLGLWVASRAASVTAVLGHPACRVRPLD  
APVPSALRGTTAGALFGELVRMNDGALRHDVPKQALRTAFAPIDAYALRERAAQLAGSRL  
RALHDADALNAWCLTVPVCAVADLLGFDDTQLDEIAARVVDFVAALSPLSDDAALARASE  
AARELLDRMTERVAHARAQDGSIVA AVQQAARDAGWQASGARVANLVGLLSQTCEATAAW  
LGNVLVAWDATAAHRTERERPMPNAAALDEFVAEVGRFDS PVQNTRRFVASRTTIEGVSV  
DAGAAILVVLAAANRDPVHRDPHRLLPGRAPGPNFGFGTGPHGCPGERIARAVTAGAFD  
AWLGACGGAPRDRLVWSYRASTNVRMPNFGTPR

>bglu\_2g21150|KEGG|CYP107DN1|[Burkholderia glumae]bgl|BP

MSDPEIQQVSLYDLFQPRWRADPYPLYRRLRDESPVHADPNGNGWIVSRHADVVAVLDDA  
RFSARLGGIEDPGGAEQLIRRTLRSQMLFLDGADHTRLRKLFKAFTPRRLDTFRPRIE  
ALAQRMLAARKGHTIDFIGEFAVPLPVMVIALVLGVPM DAHAQLHDWSLAFGSVISGRML  
SEAETAHAEAGIAAFGAYFAALIRERRREPCDDMLS DLLAAEEAGDRLDEPELIANLILL  
LAAGHATTTTHLLGNGLLALSREREQWRLLADDP AIAPAAVNELLRFDAPVQLTGRAARED  
VELGGQRLPKGAYVYTLLGAANRDERHFAAPDTLDVRRPVSRVLSFGHGVHTCLGALLAR  
IEAQIVFTSLAALYPGIEVDAQQAQRTESLSFRGLRSLPVRLV

>KS03\_3812|KEGG|CYP107DN1|[Burkholderia glumae]bgu|BP

MSDPEIQQVSLYDLFQPRWRADPYPLYRRLRDESPVHADPNGNGWIVSRHADVVAVLDDA  
RFSARLGGIEDPGGAEQLIRRTLRSQMLFLDGADHTRLRKLFKAFTPRRLDTFRPRIE  
ALAQRMLAARKGHTIDFIGEFAVPLPVMVIALVLGVPM DAHAQLHDWSLAFGSVISGRML  
SEAETAHAEAGIAAFGAYFAALIRERRREPCDDMLS DLLAAEEAGDRLDEPELIANLILL  
LAAGHATTTTHLLGNGLLALSREREQWRLLADDP AIAPAAVNELLRFDAPVQLTGRAARED



VELGGQRLPKGAYVYTLLGAANRDERHFAAPDTLDVRRPVSRVLSFGHGVHTCLGALLAR  
IEAQIVFTSLAALYPGIEVDAQQAQRTESLSFRGLRSLPVRLV

>BC1001\_1737|KEGG|CYP195A3|[Burkholderia sp.]bug|BP

MPTATAGDPAALARDFDLRRLSPDFYADPYPVYHALRAHEPVKRMPDGSFLTRFRDVQA  
VYRDPKTFSSDKTVEFRPKYGDSPLYTHHTTSLVFNDPPRHTRVRKLIAGALTARAIAAM  
EPGLVRLVDGLLDAAAERGRIDLIGDFASAI PVEIIGNLLDVPHAERAPLRDWSLAILGA  
LEPSLTDAQFERGNRAVSEFVDYLRLDLVARRRRAPGDPQHDLVTRLIQGEAGGEQLSEEE  
LLQNCIFILNAGHETTTNLIGNGLVTLTEWPDQRAALLAEPALIESAVEECLRFESSNQL  
GNRMATVDTEIGGLPVARGTPVTL CIGAANRDPEQFPDPDRFDIRREP NRHLAFGFGIHQ  
CAGLSLARLEARIAIDRFVQRFPSYRLDGEPTRGGRVVRFRGFAEVPLLCR

>BC1001\_3509|KEGG|CYP107DQ2|[Burkholderia sp.]bug|BP

MSMSLMQPAAFAPAFDPLVPHPAHVRDPYRVYAQLREHAPMYRSPHGVWIASRYAEVAFM  
LKDARFGRGYFYFENLAHRLGAGIVEQPVYSSARNMMVMKDGRDHLRLREVVARSLPRR  
IEAMRPFMLSVMYELIEAARKKPTFDVMLDLAFPLPSAVICHMIGVPKEDWQKFCQRKAN  
GSRALEPAPLSPLEMFEQNEAVNEARQYFEWLLELRRQHPGDDLTSQLAAAENAGLITRA  
EAVDNLRMMFVGGQETTVNTIGNGLLALYRNPEQLHALRNDLTLLPRAVSEMVRYSADVQ  
MTPRQAREDVEVAGASIQSGETILCILASANRDAAAWPDADRFDVTRTSNHPLSFGGGPH  
FCLGAHLGQVETEVALQAI FEHLPNLQPDIEEPRWLPGTVVFRGLQTL PATA

>BC1001\_6037|KEGG|CYP1485A4|[Burkholderia sp.]bug|BP

MPEPESFSVLPSIIGTGSADPYPLYEWLRAHRPLCRDASGVWLASSHALVTRILDDARFS  
ARPPPGAVPLDDPLGYTNMVVFQTGEAHERLRRFLAPLFSRKALLSLQAFIDDEVARLID  
QCERLPRFDLVAHIASVLPVRTICRLLGFPDEHGASYLQASAGAWQLISGAPMSAEERAL  
AALQTETFIAHVESFMLAIEPDVVPDHAAARFLRLQE GGGIGRRDMLVNVLFLEFIAGYGT  
TLLSIGNSIAALLRAPRAWQALKDDVSLVPQAVRELYRYDPAVQSVFRYAWDDVEIDGCR  
IRRGERV MPLIGAANRDPAAFAAADEIRFEREAGRSLTFGAGPHSCMGLALARMQLESLL  
SALMRMPGLRLAPGEQPRQQHGSFHGYDRLMVEH

>BC1003\_1566|KEGG|CYP195A3|[Burkholderia sp.]bgf|BP

MPTATADDPVAVLARDFDLRDLSPGFYANPYVPVYHALRTHPEVKRMPDGSFLTRFRDVQA  
VYRDPKTFSSDKTVEFRPKYGDSPLYTHHTTSLVFNDPPRHTRVRKLIAGALTARAIAAM  
EPGLVRLVDGLLDAAAERKRIDLIGDFASAIPEVEIIGNLLDVPHAERAPLRDWSLAILGA  
LEPSLTPAQFERGNRAVSEFVDYLRDLVARRRRKPGDPQHDVLTRLIQGEAGGEQLSEEE  
LLQNCIFILNAGHETTTNLIGNGLVTLTEWPDQRAALLAEPGLIESAVEECLRFESSNQL  
GNRMTTVDTEIGGLPVARGTPITLCIGAANRDPDQFPEPDRFDIRREP NRHLAFGFGIHQ  
CAGLSLARLEARTAIGRFVQRFPAYRLDGEVVRGGRVVRFRGFAEVPLLCA

>BC1003\_3437|KEGG|CYP107DQ2|[Burkholderia sp.]bgf|BP

MSMSLMQPAAFAPAFDPLVPHPAHVDPYRVYAQLREHAPMYRSPHGVWIASRYAEVAFM  
LKDPRFGRGYFYFENLAHRLGAGIVEQPVYSSARNMMVMKDGRDHLRLREVVARSLPRR  
IEAMRPFMLSVMYELIEAARKKTTFDVMLDLAFPLPSAVICHMIGVPKEDWQKFCQRKAN  
GSRALPAPLSPLEMFEQNEAVNEARQYFAWLLELRRQHPGDDLTSQLAAAETAGLITRA  
EAVDNLRMMFVGGQETTNTIGNGLLALYRNPEQLHALRNDLTLLPRAVSEMVRYSQAVQ  
MTPRQAREDVEVAGASIRSGETILCILASANRDAAAWPDADRFVDVTRTSNHPLSFSGGGPH  
FCLGAHLGQVEAEVALQAI FEHLPNLQPDIEEPRWLPGTVVFRGLQTLTPATA

>BC1003\_3622|KEGG|CYP1485A1|[Burkholderia sp.]bgf|BP

MTCAIADPGSHSVLPSIIGTGSGDPYPLYEWLRAQRPLWRDASGVWLASSHALVTRILDD  
ARFSARPPPGAQPLDDPLGYTNMVVFETGEAHERLRRLAPLFSRKALLSLQAFIDGEVA  
RLLDQCEALPRFDLVAHIASVLPVRTICRLLGFPDAHGASYLQASTGAWQLISGAPMSVE  
ERTHA AVQTETFIGNVDAFLREVDPAAPDHAASRFLRLEQEGGIGRREMLVNVFLFLFIA  
GYGTTLLSIGNIAALLRAPHAQALVDDTSLVSQAVRELYRYDPAVQSVFRYAWDDVEI  
DGCRIRRGESVMPLIGAANRDPTVFAAPDELRFEREAARSLTFGAGPHSCMGVALARMQL  
ESLLRALLRRMPELRLAPGWQPRQQHGSFHGYDRLIVER

>BC1003\_3801|KEGG|CYP133C4|[Burkholderia sp.]bgf|BP

MNFATFSSPAFFADPYPLYEKVREAGPLLSAGPSVLVTGRFEIIDALLRDRRMGKTYLQS  
VRARYGDAATHYPVFQALSRTFLMMNPPSHTKLR TLLMKAFNARQIEKLDIVEATSGAL  
LDRIGSKAEFDLVREYALPLPVEIICRLLAIPSSHGTELGEAASRLVAAF DLAPLDEAAL  
GAANEAA TLERYFLEVVEQRRADPGDDI ISSLASVEDEG TKLTDDEIVSNVILLFIAGH  
ETTSNMIGNAMVALFRHPPQLEMLKRDSTLVSKAVAECMRYDGAVQMVVRTAFEEVVMKD  
VTLPAGSIVFMLIGAANRDP AVF SHPDR LDFARGANVPSLSFGAGIHHCLGARLALLELE  
VAIGSLLARFPDMQPTQLDQLRWHARNNLRGVQELRIRT

>bgl\_1g20160|KEGG|CYP133E1|[Burkholderia gladioli]bgd|BP

MQYSDLATPDLKNPYPVFDAMRAEQVLVKLAPKLYASSHYGFGEKLLLD RRF GKGIVEA  
VKARYGEGVIDQPPFRTFRSMLPGLNPPKHTNLRALLMKSFNARQVEKFREASYTISNQL  
IDRLVKEPQGD LVTGF AFL LPMQTMCTILGVPLSDGAMFKRAADRAAGALNVTPLNAEQL  
EESRKS AIELETYFAKVLAERRKEPGDDLISQMILAEEDGQRLTDDEIVANLCFLFVAGH  
ETTENMIGNTLIALQRHPEQ RERVKADLSIMPRVVTEALRYDSSVQIAQRVALEEVELEG  
QTIQRGDLICVFLGGGNRDPEKFENPDRLDIDRENVRPLSFGGGLHYCLGARLALLEIAA  
ALEVVYTRLPLNLHLTNLDALPYRRNNALRGVDSLLGTW

>bgl\_1g21680|KEGG|CYP267C1|[Burkholderia gladioli]bgd|BP

MDTAVTPVVPALYSAEFFRNRPYPTYQKHLEGPVVQSSAMMPNTWLMFRYAACSTHLRD  
PNLSAARPPKLLVPVPEADLPRFEDMASHLQRWLLMRDQPSHKPLRKL MNKGFSPLTIQQ  
MRPRIELLVERLVDDLRAAPEPDIMRDFAYPLPVRVICELLGVPDALQDRCVVLTDDIAV  
LLANPHVTTEAAECAQDAVRELAAYFRDIIRDHEDDGEENLLNLLLHIADDDEQQMSEEE  
LLAQCVMLLFAGHETTRNLIGNGVYTLLRHPESLAAVRADPERVKS AVEEV LRFESPLQA  
VRRVT TAEVEFDGTRIPAGHTVIFVTAAANRDP RQFEDPDRFDIDRRLNRHLAFGADHHV  
CIGSTLARLEGQIAIDAIMRAFPNLQLLDQTPDWRGHAAMRGFRTL RVGI

>bgl\_2g00750|KEGG|CYP133C4|[Burkholderia gladioli]bgd|BP

MDNTFLIRPATVLMNFATFSSPAFFANPYPLYAQLRAKGALLELAPNVRVTGDYALIDAL  
LRERRAGKTYLESVRVRYGEERVGM PVFQVLSRMFLMMNPPVHTRLRKLLMKAFNARQIE

NLREIVEASTHELLDAIAAKPEFDFVADYALPQPLNVICRLLDIPFEDGARLGRAASCVA  
SALDLAPLGEAMLAEANEGALALEAYFEGVIEQRRHQPGTDLVSALISVEDEGETFDEKE  
VIANVMLLFIAGHETTSNTMGNAMIALFRNPESLAVMTADPALVPGGVAELVRYDSSVQV  
VVRTVFEDLELEGHALPRGTLFLVVGASNRDPAVFADPDRLDIRRANAKASLSFGGGIH  
YCLGARLAQMELETAIGAMLARFPKLSPVDLDRLEWHHRNNLRGVKALPMRTGVN

>bgl\_2g27800|KEGG|CYP107DN2|[Burkholderia gladioli]bgd|BP

MRDSEVSPFSMYQLMEPAQRADPYPWYRRLRDARPICRDPHVGSLLVARHAEVAAVLENP  
AFSAARLGMSESDDPVEREIGRTLGEQMLFLDPPDHTRLRKLFKAFTPRRLDAFRPRIE  
ALTHQLLDACAGRRADFIGEFAVPLPVMAIALVLGVPTGERERLHAWSLAFGSIISGRPL  
TVEEVGQAQRGIAEFRQYFAELIAARRAVPEDDMLSDLVAEEEAGDRLDEGELISNLILL  
LAAGHATTTTHLLGNGLLALAGEREQWRRFVADPSLAPTLVSELLRFDAPVQVTGREARED  
VELDGMTIPKGQYVHLLLGAANRDERQYAEPDRLDIGRTGTRMMSFGHGIHTCLGAVLAR  
IEAQIVFGALAERFPDFEVHEQDAERTATISFRGLRSLPVTLR

>BM43\_3355|KEGG|CYP133E1|[Burkholderia gladioli]bgo|BP

MQYSDLATPDFLKNPYPVFDAMRAEQVLVKLAPKLYATSHYGFGEKLLLDRRFGKGIVEA  
VKARYGEGVIDQPPFRFTFRSMLPGLNPPKHTNLRALLMKSFNARQVEKFREASYTISNQL  
IDRLVKEPQGDLVTGFAFLLPMQTMCTILGVPLSDGAMFKRAADRAAGALNVTPLNAEQL  
EESRKSATIELETYFAKVLAERRKEPGDDLISQMILAEEDGQRLTDDEIVANLCFLFVAGH  
ETTENMIGNTLIALQRHPEQRERVKADLSIMPRVVTEALRYDSSVQIAQRVALEEVELED  
QTIQRGDLICVFLGGGNRDPEKFENPDRLDIDRENVRPLSFGGGLHYCLGARLALLEIAA  
ALEVVYTRLPLNLHLTNLDALPYRRNNALRGVDSLLGTW

>BM43\_6819|KEGG|CYP133C4|[Burkholderia gladioli]bgo|BP

MDNTFLIRPATVPMNFATFSSPAFFADPYPLYAQLRAKGALLELAPNVRVTGDYALIDAL  
LRERRAGKTYLESVRVRYGEERVGMPVFQVLSRMFLMMNPPVHTRLRKLLMKAFNARQIE  
NLREIVEASTHELLDAIAAKPEFDFVADYALPQPLNVICRLLDIPFEDGARLGRAASCVA  
SALDLAPLGEDMLAEANEGALALEAYFEGVIEQRRHQPGTDLVSALISVEDEGETFDEKE  
VIANVMLLFIAGHETTSNTMGNAMIALFRNPESLAAMAADPALVPGGVAELVRYDSSVQV

VVRTVFEDLELEGHALPRGTLLFLLVGASNRDPAVFADPDRLDIRRANAKASLSFGGGIH  
YCLGARLAQMELETAIGAMLARFPKLSFVDLDRLEWHHRNNLRGVKALPMRTGVN

>BM43\_6846|KEGG|CYP183AG1|[Burkholderia gladioli]bgo|BP

MDIDLTDKPAHVDPAPLPEAPIPRAPGSLPIVGHAARLLFKPLSFLSGLAPLGGLVRVDL  
GRLPMLLLTDPQLTRQVLNDSRTFDKGGALFDKVRELTGNSLLTSRYDDHKLQRRQMOPA  
FSRKRIPTYIDVMNEAIGGVIGGWCDGDVVDLTAACYDITARTASRTMFAADVAGAAAAS  
LVEDLSVYLGGLFVRMMLPSGLPGRVPTPGSLRYDRAVARLHAAIEQIIDAYRASGVDHG  
DLLSMMLAARDEDGQPSQQEVHDQVITLFLAGIETTAGVMSWTLYLLGRHPDIAERAAA  
EVRTTLGDAAVPQAEHLMQLGETRRAMMEALRLYPGWIFTRVVTRDTMLGPYRLRVGDG  
LAYSPYVLHRNPALFAAPERFDPDRWLPERAAAIPEHGFIPFGGGVHKCIGDQFGTTENL  
LALAAILSRWKLEPVTSQPVEPIPRRATLSPSRFMVRLRRR

>BYI23\_B006960|KEGG|CYP1220A11|[Burkholderia sp.]byi|BP

MNATSVGAPLREVDDLPSRGLPLVGNLHQLPPATHHLLTLERWAAELGTPYVFRFGTTPV  
TVWNDIELSHAVLRERPHRYRRYAPIENILKEFGCNGLFSIEGAWEFPQRRLVMQALSIP  
HIKAFYPTLAAIAERLRRRWEEAARAGRVDMTGDLKRFVVDVTSALAFGEDPNTLENER  
VLIQEQLAMLLPMLMSRVNAPFAYWHYVKFPRDRKFDEAMSAVHRHIRELMARTRARMRE  
QAAQTSESAAPQNLEAMLAMRDAPGSGITDDEVAANVLTMLVAGEDTTATSIWALLFL  
GTDDALQARVAADSRRVLGGSVCPDYTAMRELDLCEAVCTEASRLHPIAPYLSLEPLEE  
VRLQGVRLPAGTKMFLNRPAMLDPHNFADPRRYDPDRWLHDQYREGAHESRAYLQFGAG  
PRVCPGRHLAAVEMRLVVSMLTANFIAQLATNPADIHEICAFVSVPSEMPMRLVLR

>BYI23\_D004940|KEGG|CYP1112A12|[Burkholderia sp.]byi|BP

MTSVPQSGIDLWADDVLVDPPSYRALRELGEVVYLTHSKLYALTGYDVIKDALADPTRF  
SSAQGIGFNDGVNQALQGTSLASDPPVHTRLRAALSENLTPRALRGLGEQIKANAQALVA  
RLVKQPSFDAIDDIARRFPIGVVADLVGFQGDARANMLRWGQAAMEVVGPMNQRTAEHFP  
IASELYGYCSQITQDALTHGSVGWGVFEAERKGIPEGAARHIIHQYLGAGLDTTLAAIG  
NTVALFGRFPPEFAKVREDLSLVPSAFNEVLRYYSPVHVWSRVATQDVEVGGVKIPGGSR  
IAIILGAGNHDPRIYKDPFVFDVTRNPIDHLSFGYGPHGCAGQGLARMEGAIIIEALATQ

IKSFRIGDVARVPSNITLSFDTVPVMDLEAV

>BYI23\_D011260|KEGG|CYP116B124|[Burkholderia sp.]byi|BP

MTAAPQCPFHDHAPNGCPVSPRAAEFDPFGDGYQQDPPEYVRWAREQEPVFWSPKLGWI  
VTRYDDIKAIFRDNITFSPSIALEKITPTGPEANAVLASYGFAFNRTLNVNEDEPAHMPPR  
RALMDPFTPEALAQHEPMVRALAREYVDRFIDEGRADLVDQMLWEVPLTVALHFLGVPEE  
DMDTLREYSIAHTVNTWGRPKPEEQVEVAHAVGKFWQFAGKVLDKMREDPSGPGWMQYGI  
RKQKELPDVVTDSYLHSMMAAGIVAAHETTANATANALKLLLQHPDAWRDICDDPSLIPN  
AVEECLRHNGSVAAWRRLATKDVITIGGIEIAAGSKLLIVTSSANHDQHQFADADLFDIR  
ENASDQLTFGYGAHQCMGKNLARMEMQVFLDELTRRLPHMRLAEQRFTYVPNTSFRGPEH  
LHVEWDPAMNPERANPSVREARAVVRIGEPSSHAVSRAVIVDSVDASADRIVRVRLVSAD  
GRDLPRWTAGSHIDVVCGETGLSRQYSLCGDPDDRRAFEIAVLRETDSRGGSAWVDNVK  
PGAHWRIRGPRNHFRLEDTAKKLVLIAGGIGITPISAMARRARTLGIDYELHYSGRSRAS  
MTLVDEMRAHGERLVLHMSEEGARNDFTTLAVDARTQVYACGPARMLDALADASASWPE  
DALKIEHFESTLATLDAEKEHAFAVELKDSGLVLAVPADQTLLTALRRANVDVQSDCEE  
LGSCEVRVLEGEIDHRDVVLTKGERQANRMSCCSRAKGKRLVLAL

>BYI23\_D012450|KEGG|CYP105T2|[Burkholderia sp.]byi|BP

MMAHERAERAEPFPFGRPDAPLSPPPEYACLRANQPLSKVRLWDGSTAWIATRWEDVRA  
ILGSPFFSVDPFRPGYPSVSPARAVQARSQAFINMDDPDHARFRMLTKDFMQKRMSDL  
RPMVRQFVDELIDRMIEHGPPLDFVEHFSQPLPSMVISALLGVFPYEDHARLGWSTTRND  
HTAAPEVVQEAVRKMEAHLGRIVAQKESDPGDGRDMLSRVIEQIHPGHVTREEVRIAS  
LLYSAGHGTGTSQIGLGTLSLLMNPQAQRAELDADPSLLAGAVEEMLRFHTIAHFNSARVA  
TADVITIGGQLIHAGEGVYPLIFAANRDPDVFPQPDFTDIHRNPQEHVAFAYGIHQCLGQP  
LARLELQTVFSMLFKRLPELRLAVPVESLAFNSTSQVYRLEALPVTW

>BYI23\_D012630|KEGG|CYP105CV1|[Burkholderia sp.]byi|BP

MWDGKDAWLFTTRYDDVRAVLGDNRFSGDPHIDGFPSLSPARNAVLDLLEPAFIRMDPPQHG  
HFRRLTKFEMIKRVSSEMRPRIDSIFNRLVDELLEKGPPANLVEDLFLPLTSEVIAGLLD  
VPASDHGFFQEQSRLKVLLDVPDPSIPKAASDRILSYLDRLITERAKDADNRTDLLSRLIV  
EQVRPGHLTHRELVIMAEALLMAGHETTANQMALGVFSFLTNPDLRLRETPSLLRNAV  
EEMLRFHFTIVHYNAFRVATEDVDVAGQTIRKGEVIALISGANHDATAFEQPDREFDITRK  
ADHHVAFSYGIHQCLGQPLARVELQVVFATLFERMPDLRFVPLEEIKGKGDFVQGLETL  
LPVTW

>BYI23\_D012740|KEGG|CYP105T3|[Burkholderia sp.]byi|BP

MAPPSQYAMLREQAPVVQVSLWDGSLAWLVTDMEHFREVMTSPHFSASPLTPGFPFVSPS  
RAAQSKSYQTFITMDPPEHGHYRRTLTKEFMAKRMQALRPLVQVRSDELDDMERHGAPA  
DFIEAVALPLPSLVISIMLGVPYEDHDKLQKWSGNRMDSLIAPEELTRSAQHMNQYIDAL  
LLEKERDPGDGSDLLSRMAIEWINPGKVSADAVQMATLLYLAGHETTANQIGLGLLSLF  
QHPEQRAALMADSSLVKGAVEEMLRFHSITHMNSNRVATEDVVGQQLIRKGEVLAALLH  
GANHDPLAFPEPESFDIRRDTKDQSHVAFSFGIHQCLGQPLARLELQVVFETIFKRFPHL  
ELAVPEDALRYKDKSFVYGLKALPVRW

>BYI23\_D012760|KEGG|CYP105T4|[Burkholderia sp.]byi|BP

MHPPPRYAVVRES DPIKRVKAWDGSDVWVVTMKMDFRDVLTSPHFSASPETHGYPSVSPA  
RAAQSKSYQTFITMDPPEHGHYRRTLTKEFMMKRIDELRPFVQETLEALLEQMIGKGAPA  
DFIQDVALPLPSMVISIMLGVPYQDHARLQQLSSNRMNLDISPPELLRQSAQEMEYIDCL  
LREKERDPGEGKDLLSRLAIEWINPGKLSHADAVQMGVLLYLAGHETTANQIGLGLLSLL  
EDPGQVKALMADPSLVKGAVEEMLRFHSITHMNSARVATADVMIGGQQLIRKGEVFAPVQ  
AANHDPEAFPEPDRFDIRRDGKGASHVAFSFGVHQCLGQPLARLELQVLFETLFRRLPTL  
RLAVPFDALFVKRNGNVFGLVSLPVEW

>MYA\_5060|KEGG|CYP229F5|[Burkholderia sp.]buk|BP

MNPTDPIAAVTHRDPYPYATLVDGPPLAFDATLGLWVASRAASVAAVLGHPCTCRVRPLD

APVPPALRGTTAGALFGDLIRMNDGALRHDVPKQALRAAFASIDAHALRERTASLAGRRL  
RAPLDAEALNAWCLTVPVCAVADLLGFDEAQLDDIAALVVAFVAALSPLSDDATLARASD  
AARRLLERMTERVARTRARDGSLVAAVQDAARAAGWQAGGALVTNLVGLLSQTCEASAAW  
LGNALIAWEESARASADGGRAIPDAAALDAFVAEVGRFDSVPQNTRRFVASHTTIEGVSV  
DAGAAILVVLAAANRDPVHREPHRLLPGRAPAPTFGFGKGPBGCPGERIARAVTTGAFD  
VWLHASSGELPSGLVWDYRASTNIRMPNFGIASQA

>BRPE67\_BCDS09300|KEGG|CYP1220A10|[Burkholderia sp.]bue|BP

MNATSVGAPLREVDDLPSPRGLPLVGNLHQLPPATHHLLTLERWAAEFGTPYVFRFGTTPV  
TVWNDELSHAVLRERPHRYRRYAPIENILKEFGCNGLFSIEGAWEPPQRRLVMQALSIP  
HIKAFYPTLAAIAERLRRRWEAAARAGRVVDMTGDLKRFTVDVTSALAFGEDPNTLENER  
VLIQDQLAMLLPMLMSRVNAPFAYWHYVKFPRDRKFDEAMSAVHRHIRELMARTRARMRE  
QAVQTRESAAPQNLLEAMLAMRDTPGSGITDDEVAANVLTMLVAGEDTTATSIWALLFL  
GTDDALQARVAADSRRVLGDSAVCPDYTAMRELDLCEAVCTEASRLHPIAPYLSLEPLEE  
MRLQGVRPLPAGTKMFLNRPAMLDPHNFADPRRYDPDRWLHDQYREGAHEPRAYLQFGAG  
PRVCPGRHLAAVEMRLVVSMLTANFIAQLATDPADIHEVCAFVSVPSEMPMRLVLR

>BRPE67\_DCDS01110|KEGG|CYP105T2|[Burkholderia sp.]bue|BP

MQNDADVMAHEPAFPFGRPDAPLSPPAEYACLRANQPLSKVRLWDGSTAWIATRWEDVRA  
ILGSPFFSVDPFRPGYPSVSPARAVQARSRQAFINMDDPDHARFRMLTKDFMQKRMSDL  
RPMVRQFVDELIDRMIEHGPPLDFVEHFSQPLPSMVISALLGVPYEDHARLGEWSTTRND  
HTAAPEIVQEAVRKMEAHLGRIVAQKEADPGDGRDMLSRVLIEQVQPGHVTREEVVRIAS  
LLYSAGHGTTGSQIGLGTLSLLMNPAQRAELDADPSLLAGAVEEMLRFHTIAHFNSARVA  
TADVTIGGRLIQAGEGVYPLIFAANRDPDVFPQPDTFDIHRNPQEHVAFAYGIHQCLGQP  
LARLELHTVFSMLFKRLPELRLAVPVESLAFNSTSQVYRLEALPVTW

>BRPE67\_DCDS01290|KEGG|CYP105CV|[Burkholderia sp.]bue|BP

MSGCPFSKPAFPMPRQC PFVPPAEYRDFQQQPGPVKVQMWDGKDAWLFTRYDDVRAVLGD  
NRFSGDPHIDGFPSLSPARNAVLDLEPAFIRMDPPQHGHRMLTKEFMKRVSEMRPRI



DSIFNRLIDELLEKGPPANLVEDLFLPLTSEVIAGLLDVPACDHGFFQEQSRLKVLLDVD  
PSIPKAASDRILSYLDRLITERAKDADNRDRLSRLIVEQVRPGHLTHRELVIMAEALLM  
AGHETTANQMALGVFSFLTNPDLRLRLRETPSLLRNAVEEMLRFHTIVHYNAFRVATEDV  
DVAGQTIRKGDGVIALISGANHDATAFEQPDREFDITRKADHHVAFSYGIHQCLGQPLARV  
ELQVVFATLFERMPDLRFVPLEEIKGKGDFVQGLEALPVTW

>BRPE67\_DCDS01410|KEGG|CYP105T3|[Burkholderia sp.]bue|BP

MLETTATCPFATERFPWPRDGAAPLAPPSQYATLREQAPVVQVSLWDGSLAWLVTMEHF  
REVMTSPhFSASPLTPGFVSPSRAAQSKSYQTFITMDPPEHGHRRTLTKEFMAKRMQ  
ALRPLVQRLDELDDMERHGAADFIKVALPLPSLVISIMLGVPYEDHDKLQKWSGNR  
MDLSIAPEELTRSAQHMQYIDALLLEKERDPPGSDLLSRMAIEWINPGKVSHADAVQM  
ATLLYLAGEHETTANQIGLGLLSLFQHPEQRAALVADASLVKGAVEEMLRFHSITHMNSNR  
VATEDVVIGGQLIRKGEGLALLHGANHDPLAFPEPESFDIRRDTKDQSHVAFSFGIHC  
LGQPLARLELQVVFETIFKRFPHELELAVPEDALRYKDKSFVYGLKALPVRW

>BRPE67\_DCDS01430|KEGG|CYP105T4|[Burkholderia sp.]bue|BP

MANDTSTQSCPFNDTFPWPRAAECPLHPPRYAVVRES DPIKRVKAWDGSDVWVVTMK  
DFRDVLTSPHFSASPETHGYPSVSPARAAQSKSYQTFITMDPPEHGQYRRTLTKEFMKR  
IDELRPFFVQETLDSLLDQMIKGAADFIQDVALPLPSMVISIMLGVPYQDHARLQQLSS  
NRMNLDISPELLRQSAQEMEYIDCLLREKERDPGEGKDLLSRLAIEWINPGKLSHADAV  
QMGVLLYLAGHETTANQIGLGLLSLLEDPGQVKALIADPALVKGAVEEMLRFHSITHMNS  
ARVATADVMIGGQLIRKGEGLVAFVQAANHDPEAFPEPDRFDIRRDGKGASHVAFSFGVH  
QCLGQPLARLELQVLFETLFRRLPTLRLAVPFDALEFKRNGNVFGLVSLPVEW

>BRPE67\_DCDS06740|KEGG|CYP1112A12|[Burkholderia sp.]bue|BP

MTSVPQSGIDLWADDVLVDPPSYRALRELGEVVYLTHSKLYALTGYDVIKDALADPTRF  
SSAQGIGFNDGVNQALQGTSLASDPPVHTQLRAALSENLTPLRLGLGEQIKANAQALVA  
RLVKQPSFDAIDDIARRFPVGVADLVGFQGEARANMLRWGQAAMEVVGPMNQRTAEHFP  
IAGELYGYCSQITQDALTHGSVGWGVFEAERKGI IPEGARHIIHQYLGAGLDTTLAAIG  
NTVALFGRFPPEFAKVREDLSLVPSAFNEVLRYYSPVHVWSRVATQDVEGVNVIKIPGGS

IAIILGAGNHDP RHYKDPEVFDVTRNPIDHLSFGYGPHGCAGQGLARMEGAAIIEALATQ  
IKSFRIGDVARVPSNITLSFDTVPVMELEAV

>BRPE67\_DCDS13390|KEGG|CYP116B124|[Burkholderia sp.]bue|BP

MTAAPQC PFHDHAPNGCPVSPRAAEFD PFGDGYQQDPPEYVRWAREQE PVFWSPKLG YWI  
VTRYDDIKAI FRDNITFSPSIALEKITPTGPEANAVLVSYGFALNRTL VNEDEPAHMPRR  
RALMDPFTPEALAQHEP MVRALAREYVDRFIDDGRADLVDQMLWEVPLT VALHFLGVPEE  
DMDTLREYSIAHTVNTWGRPKPEEQVEVAHAVGKFWQFAGKVLDKMREDPSGPGWMQYGI  
RKQKELPDVVTDSYLHSM MMAGIVAAHETTANATANALKLLLQHPQAWRDICEDPSLIPN  
AVEECLRHNGSVAAWRRLATK DVTIGGIEIAAGSKLLIVTSSANHDQH QFADADLFDIRR  
ENASDQLTFGYGAHQCMGKNLARMEMQVFLDELTRRLPHMRLAEQRFTYVPNTSFRGPEH  
LYVEWDPAMNPERANPSVREARAVVRIGEPSSHAVSRVIVESVDASADRIVRVRLVSAD  
GRDLPRWTAGSHIDVVCGETGLSRQYSLCGDPDDRRAFEI AVLRETDSRGGSAWVHDNVK  
PGAHWRIRGPRNHFR LDETAKKLVLIAGGIGITPISAMARRARTLGIDYEVHYSGRSRAS  
MTLIDEMRALHGERLVLHVSEEGARNDFTTLAVDARTQVYACGPARMLDALANASASWPE  
DALKIEHFESKLATLD AEKEHA FEVELKDSGLVLAVPADQTLLTTLRRANVDVQSDCEEGL  
LCGSCEVRVLEGEIDHRDVVLTKGERQANRMSCCSRAKGKRLVLAL

>BW21\_3812|KEGG|CYP1486A1|[Burkholderia sp.]bul|BP

MRDMSKVEYDAAKIRPFNIDPQVA AIIKNPERPEAFPP LAKVPKSIPGTSGF IAGMKSLF  
AYKREGLQFFANQANI HGKVFRNQLGPYSIVGVVDHEVISQILKNGDRCWSTAL AVERVT  
RGLSFDIDLKKKSRLMSLDFDAHRQVRTL VQPAFSDRALASYLAI IQQEFTRDIEAWPRD  
GEVPFRVEARQIFSQLAARLFFGIEDSSEAA RLEGATRDYWNAI PVVLKNRHLNERWRRG  
LDGVATLSSIMYDLIPKRRDEGGTDLFSQLCKSREDTGGLDDDQLVDLMLNIVFAAFD TT  
TMGITS MAYLLAKHPHWQEV LRAESMRLPEQAALADFN GMERTTQVWKETLRMYPVSAIT  
PRVSLGECQVG PYPVPPRTL VFNFTGLLGQSDSLWDHPQRFDPERFSPERA EYQRHRGQY  
LPFGHGVHTCVGAALANLEAKVFW SIVLTRYKFS LAKDYDAVHCMNPLG SVSGEVALKVE  
RL

>BW21\_4258|KEGG|CYP1488A2|[Burkholderia sp.]bul|BP

MSAAAKLALPKNLVNLNRGLHSMREPEHGRHKRLLTGTINRELFDAHRNGIRAALDRLGE  
RLKEDGRIAVVSRMRELTSEMASHVFLGPRCHEEDAELAFLLSAYFTLRREASSLNARDP  
HVYRAELIGVGQQLDRTLREIRRYRNGPADDRAGLLRRLATAGLPGSPALSEDEIVGHA  
NVMFVSSTEPVAISLTWLLLVLSQLPGLRRALRAEIAGRASSPTSPGGAPLLENVNETL  
RLLTPNALMVRATTRAVALQGVLPALHCEIVVCPFLAHREAGFPDPLAFSPSRWETARP  
SPYEYFPPFGAGGHFCAGRNLALLLIREVLSTLLLRFDVFLDGEQSIDWRIHIMLMPTGDP  
TLIAHPADERRDTSPSPKWRGPATDLFHFAPGLS

>BW21\_4313|KEGG|CYP1013A3|[Burkholderia sp.]bul|BP

MSKYRQAPGPRGSLVMGNLAAYKRNPIITMLRLHQYQYGDVARNRLGPFVTHAIAHPDHIQ  
YVLQENHRNYVRGRFYDNFKMFFGDGLLTDDGEFWRRHRRRAVQPLFHKKQVDAHTAAVGD  
AALALAHRSALPPGKAIDVVEEMMHLSLRMLGLMVFNDDVSSHAEAVGPAVRFGIEAMM  
PQGDMDNFIPRWAPTRFNRRIAHARRAIDTIIAKIIADHREARCEPSDVISLLLNARDPD  
TGAPMTQQEVHDEVMTVFLAGHETTGAGLAWALYALAQHPAVLRQLRDELDARLGGRAPT  
VQDFEQLPYLSQVVDEVLRVYPPIWGFTRDLVEDDEIGGYRIPARSSVFMSPYVTHRHPA  
FWRNPDAFDPENFASDAPARHRFVYFPFGGGMKRCIGFQTALLQMRVLVAVVAQHFDLNA  
LPGHPIIEFGATISLRPVHGIRLIVKPRERQQSHLARVREHESARALRPLGDTVAAAGAAC  
PMAAALALDAAHGGGAATAAAAREAAQHEPGDVATLSLATSPATALPAAGTDTDASARSV  
PAWRFTWRPVPVDPVPDEPSPALSGRRIALVNGRGGTVERVAAALARTCAKVSVFAPAAN  
ADHAEAAARVFNAGPLDGLVLDGLEAPFALDDASAWAEMRRTVELLKACYGDWAAEDD  
TSRLFYVALTWMDGQMGYGADAGAQPLGGLWAGLAKTLPQELPNCNVRVLDIAPDETGRV  
DRLVVNELYRWGLFEVGYRNGVRYTLHAKRNELPPLAVDARSALGPGDAVLFSGGARGIG  
LLCARALAGRHGCTVIVTGRETTPDGGEPPWMTLDEEGFKRYGLEQLRAATPEHPPKAIRA  
SLQRLKRRRELKTALDEMAALGLPVHYRVCDVTDRAAVRALCDELGDSLRIVIHNAGVDE  
PARLIRKRADDFAVTRTKVLGFANLCAVRAVRPRLAQFCNVGSLTGRWGGMGTGETDYAA  
ANEALARLGLWAAQHALSPACGVKTLVWPTWEGVGMITNFAVTQRYVSPMNVDEGVRHWL  
RELASPGSGEVMFMGAVGRAPTPVQIKGFQPIRELPNIGELVTRRHVGEVPRFRPFKRF  
EGRYAIDPAVAPYAHAFRFRNGRAVVPASLVLEHACAVGDWVMPPTGEPRELSEMANVVLR  
LDALPAVPAGGAGVEIGSEAAGYMIGDVWCVDVRCSDARTRAELLSMTLVYRPQPEQIGA  
AYARAPGATPEPAPLTSAPHAANGELLPAGDWSVPDDASAGIVRIGRVPPAAVLSLWTL  
PLPLELRLPVNHVEHVLRLVLLAEWGAAQTDAVAVWRIGGAKLARLPAASADGVVEYATGR

FAVL DARGYVLLRID DTRVDGDAAQAMQTETGALAAPLTA

>AC233\_07625|KEGG|CYP195A3|[Burkholderia sp.]buq|BP

MSTATADAATLARNFDLRHLSPEFYADPYPVYHALRAHEPVKRMPDGSFLTRFRDVQAV  
YRDPKTFSSDKTVEFRPKYGDSPLYTHHTTSLVFNDPPRHTRVRKLIAGALTARAI AAME  
PGLVQLVDGLLDAAAERGRIDLIGDFASAI PVEIIGNLLDVPHAERAPLRDWSLAILGAL  
EPSLTDAQFERGNRAVSEFVDYLRGLVARRRREP GDPQHDLVLTRLIQGEAGGEQLSEEEEL  
LQNCIFILNAGHETTTNLIGNGLVTLTEWPDQRAALLAEP SLIESAIEECLRYESSNQLG  
NRMTTVDT EIGGQPVARGTPVTLCIGAANRDPEQFAEPDRFDIRREP NRHLAFGFGI HQC  
AGLSLARLEARIAIGRFVRRFPSYQLDGEPTRGGRVVRFRGFAEVPLL CR

>AC233\_33915|KEGG|CYP1485A3|[Burkholderia sp.]buq|BP

MTLTFDVPFTDTRTHADGEPPMTCEIPDPGSYSVLPSIIGTGSGDPYPLYGWLRAHRPLC  
RDASGVWLASSHALVTRILDDARFSARPPPGTEPLDDPLGYASMVVFQTGEAHERLRRFL  
GPLFSRKALVSLQAFIDDEVARLVDQCEHLPRFDLVANIASALPVRTICRLLGFPDAHGA  
SYLEASAGAWQLISGAPMSAAEHALAAMHTEAFLAQVESFMRAIDPHAAPDHAASRFLRL  
EQEGGIGRREMLVNILFLFIAGYGTTLLSIGNSVAALLREPRAWQALKDDVALVPQAVRE  
LYRYDPAVQSVF RYAWDDVEIDGCRIRRGERV MPLIGAANRDP AVFAAPDEIRFEREAGR  
SLTFGAGPHSCMGLALARMQLESLLRALTRMPDLRLAPGWQARQQHGSFHGYDRLMVER

>BGL\_2c05550|KEGG|CYP133E1|[Burkholderia plantarii]bgp|BP

MQYSDLATPEFLKNPYPVFEAMRAEQVLVKLAPKLYATSHYAFGEKLLLD RRF GKGIVEA  
VKARYGEGVIDQPPFRTFRSMLPGLNPPKHTNLRALLMKSFNARQVEKFREASYTISNQL  
IDKLVKEPQGD LVTGF AFL LPMQTMCTILGVPLSDGAMFKRAADRAAGALNVTPLNAEQL  
EESRKS AIELETYFAKVLAERRKEPGDDLISQMILAEEDGQRLTDDEIVANLCFLFVAGH  
ETTENMIGNTLIALQHHPEQRERVKADLSIMPKVVT EALRYDSSVQIAQRVALEEVELEG  
QTIQRGDLICVFLGGGNRDPEKFENPNALDIDRENVRPLSFGGGLHYCLGARLALLEIAA  
ALETVYTRLPNLHLTNLDALPYRRNNALRGVDSLLGTW

>BGL\_2c27660|KEGG|CYP107DN1|[Burkholderia plantarii]bgp|BP

MSDPEIIQQVSLYDLFQPRWRADPYPLYRRLRDESPVHADPNGNGWIVSRHADVVAVLDDA  
RFSAA RLGGIDDES RTEQAIRRTL SKQMLFLDGADHTRLRKLF AKAFTPRRLDTFRPRIE  
ALAH RMLAAQAGRTIDFVSEFAVPLPVMVIALVLGVPMNAHAQLHDWSLAFGSVISGRVL  
SDAETARAEAGIAAFGAYFAELIRERRREPGDDMLSDLLAAEEAGDRLDESELIANLILL  
LAAGHATTTTHLLGNGLLALSREREQWRL LADDP AIAPAAVNELLRF DAPVQLTGRAVLED  
VELGGQRLPKGAYVYTLLGAANRDERHFAAPDTLDVRRPVSRVLSFGHGMHTCLGALLAR  
IEAQIVFTSLAALYPGIEVDAQQARRTESLSFRGLRSLPVRLV

>bpln\_1g20870|KEGG|CYP1481A2|[Burkholderia plantarii]bpla|BP

MTIPTLIPPSQHTRAVPFPGLIAHAPGPD TDTEHGAA FRAAVIEGGLDASDYFARSGVAE  
LASRSGGLCTLWIDNDLAIYQNTNEPLVEDDDLMPSINTNAGLFGSFMGGLDANDPVRVA  
KREFVERILGNARFVYGLSDEITAATRAYLDSPLSQDTS LDTFCLNLTAYVDSVIPGILD  
LQIRPLTDYLAEP IFGRIATSFFE IASEAISKLNVA AIQDADLIVDLTMRILLDNYQSIE  
AAPQGNLIRSQFGNFGIPFSRQGIATLTDAQLKELGTLIVATYDTTALSLLWTIAYLETT  
PGARDRLLD SLGDHEVAQQTATMMVLEAIRLGGSNPTSLWRRSRRPVTILHRGSSVDIPA  
GTMFWLDRRLANRDPQRFARPNVFDPGNIEGIANHGGIEAASLLARNRYEINSFSMINTV  
RNPRKCPGRLFSVRAQALMLTELYRSNRVVVSGVSTGLMPGSAMPRPACPGSIRVEPIQ

>bpln\_2g06110|KEGG|CYP133E1|[Burkholderia plantarii]bpla|BP

MQYSDLATPEFLKNPYPVFEAMRAEQ LVKLAPKLYATSHYAFGEKLLLDRRFGKGIVEA  
VKARYGEGVIDQPPFRTFRSMLPGLNPPKHTNLRALLMKSFNARQVEKFREASYTISNQL  
IDKLVKEPQGD LVTGF AFL LPMQTMCTILGVPLSDGAMFKRAADRAAGALNV TPLNAEQ L  
EESRKS AIELETYFAKVLAERRKEPGDDLISQMILAEEDGQRLTDDEIVANLCFLFVAGH  
ETTENMIGNTLIALQHHPEQ RERVKADLSIMPKV VTEALRYDSSVQIAQRVALEEVELEG  
QTIQRGDLICVFLGGGNRDPEKFENPNALDIDRENVRPLSFGGGLHYCLGARLALLEIAA  
ALETVYTRLPNLHLTNLDALPYRRNNALRGVDSLLGTW

>bpln\_2g27700|KEGG|CYP107DN1|[Burkholderia plantarii]bpla|BP

MSDPEIQQVSLYDLFQPRWRADPYPLYRRLRDESPVHADPNGNGWIVSRHADVVAVLDDA  
RFSAAARLGGIDDESRTQAIIRRTLQMLFLDGADHTRLRKLFAKAFTPRRLDTFRPRIE  
ALAHRLAAQAGRTIDFVSEFAVPLPVMVIALVLGVPMDAHAQLHDWSLAFGSVISGRVL  
SDAETARAEAGIAAFGAYFAELIRERRREPDDMLSDLLAAEEAGDRLDESELIANLILL  
LAAGHATTTTHLLGNGLLALSREREQWRLADDPAPAAVNELLRFDAPVQLTGRAVLED  
VELGGQRLPKGAYVYTLLGAANRDERHFAAPDTLDVRRPVSRVLSFGHGMHTCLGALLAR  
IEAQIVFTSLAALYPGIEVDAQQARRTESLSFRGLRSLPVRLV

>AQ610\_21835|KEGG|CYP1486A1|[ Burkholderia sp.]bud|BP

MRDMSKVEYDAAKIRPFNIDPQVAIIKNPERPEAFPPLAKVPKSIPGTSGFIAGMKSLE  
AYKREGLQFFANQANIHGKVFRNQLGPYSIVGVVDHEVISQILKNGDRCWSTALAVERT  
RGLSFDIDLKKKSRLMSLDFDAHRQVRTLVQPAFSDRALASYLAI IQQEFTRDIEAWPRD  
GEVPFRVEARQIFSQLAARLFFGIEDSSEARLEGATRDYWNAIPVVLKNRHLNERWRRG  
LDGVATLSSIMYDLIPKRRDEGGTDLFSQLCKSREDTGGLDDDQLVDLMLNIVFAAFDIT  
TMGITSMAVLLAKHPHWQEVLRALSMRLPEQAALADFNMGERTTQVWKETLRMPVSAIT  
PRVSLGECQVGPPYVPPRTLVEFNFTGLLGQDSDLWDHPQRFDPERFSPERAQYQRHRGQY  
LPFGHGVHTCVGAALANLEAKVFWISIVLTRYKFSKADYDAVHMCNPLGSVSGEVALKVE  
RL

>AQ610\_19620|KEGG|CYP1488A2|[Burkholderia sp.]bud|BP

MNGLPSSLPRVGSTESLFAEPLAFLARARSQHGDVVVMRERGPIF  
SRASDCSGVIAVFGEHRLRQILTEIDDFALPMSAAKLALPKNLVNLNRGLHSMREPEH  
GRHKRLLTGTINRELFDAHRNGIRAALDRLGERLKEDGRIAVVSRMRELTSEMASHVFL  
GPRCHEEDAELAFLLSAYFTLRREASSLNARDPHVYRAELIGVGQQLDRTLREIRIRYR

NGPADDRAGLLRRLATAGLPGSPALSEDEIVGHANVMFVSSTEPVAISLTWLLLLVLSQL  
PGLRRALRAEIIAGRASSPTSPGGAPLLENVNETLRLLTPNALMVRATTRAVSLQGVAL  
PAHCEIVVCPFLAHREAGPFPDPLAFSPSRWETARPSPYEYFPFGAGGHFCAGRNLALL  
LIREVLSTLLLRFDVLDGEQSIDWRIHIMLMPTGDPTLIAHPADERRDTSPSPKWRGPA  
TDLFHFAPGLS

>ALX46860.1|NCBI|CYP1013A3|[Burkholderia sp.]bud|BP

MSKYRQAPGPRGSLVMGNLAAYKRNPITMLRLHQYGDVARNRLGPFVTHAIAHPDHIQ  
YVLQENHRNYVRGRFYDNFKMFFGDGLLTDDGEFWRRHRAVQPLFHKKQVDAHTAAVGD  
AALALAHRSALPPGKAIDVVEEMHLSLRMLGLMVFNTDVSSHAEAVGPAVRFGIEAMM  
PQGD MNDFIPRWAPTRFNRRIAHARRAIDTIIAKIIADHREARCEPSDVISLLLNARDPD  
TGAPMTQQEVHDEVMTVFLAGHETTGAGLAWALYALAQHPAVLRQLRDELDARLGGRAPT  
VQDFEQLPYLSQVVDEVLRVYPPIWGFTRDLVEDDEIGGYRIPARSSVFMSPYVTHRHPA  
FWRNPDAFDPENFASDAPARHRFVYFPFGGMRKCIGFQTALLQMRVLVAVVAQHFDLNA  
LPGHPIIEFGATISLRPVHGIRLIVKPRERQQSHLARVREHESARALRPLGDTVAAAGAAC  
PMAAALALDAAHGGGA AVAAAREARQHEPGDVATLSLATSPATALPAAGTDTDASARSV  
PAWRFTWRPVPVDPVPDEPSPALSGRRIALVN GRGGTVERVAAALARTCAKVS VFAPAAN  
ADHAEAAARV FVNEAGPLDGIVDLGLEAPFALDDASAW EAPMRRTVELLKACYGDWAAEDD

TSRLFYVALTWMDGQMGYGADAGAQPLGGLWAGLAKTLPQELPNCNVRVLDIAPDETGRV  
DRLVVNELYRWGLFEVGYRNGVRYTLHAKRNELPPLAVDARSALGPGDAVLFSGGARGIG  
LLCARALAGRHGCTVIVTGRETTPDGGEPMWTLDEEGFKRYGLEQLRAATPEHPPKAIRA  
SLQRLKRRRELKTALDEMAALGLPVHYRVCDVTDRAAVRALCDELGDSLRIVIHNAGVDE  
PARLIRKRADDFARTVVRTKVLGFANLCDAVRARPRLAQFCNVGSLTGRWGGMGTGETDYAA  
ANEALARLGLWAAQHALLSPACGVKTLVWPTWEGVGMTITNFAVTQRYVSPMNVDEGVRHWL  
RELASPGSGEVMFMGAVGRAPTPVQIKGFQPIRELPNIGELVTRRHHVGEVVRFRPFKRF  
EGRYAIDPAVAPYAHAFRFNGRAVVPASLVLEHACAVGDWVMPPTGEPRELSEMANVVLR  
LDALPAVPAGGAGVEIGSEAAGYMIGDVWCVDVRCSDARTRAELLSMTLVYRPQPEQIGA  
AYARAPGATPEPAPLTSAPHAANGELLPAGDWSVPDDASAGIVRIGRVPPAAVLSLWTL  
PLPLELRPLPVNHVEHVLRLVLLAEWGAAQTDAPAVWRIGGAKLARLPAASADGVVEYATGR  
FAVLDARGYVLLRIDDTRVDGDAAQAMQTETGALAAPLTA



>DM992\_22260|KEGG|CYP229F2|[Burkholderia sp.]burk|BP

MNPNPTDPIAAVTHRDPYPYAAALVDGPPLAFDAALGLWVASRAATVTAVLGHPACRVRP  
LDAPVPPALRGTTAGALFGELVRMNDGALRHDVVKQALRTAFAPVDTARLRARAAQLAAR  
RLPAPGDADALNAWCMTVPVCAVADLLGFDETQLDDIAARVVDVFAALSPLSDAAALARA  
SDGARQLLDRMSERVAQTHAHDGTLVAAVQQAARASGWQASGALVANLVGLLSQTCEATA  
AWLGNTLAAWNGEAEAARNAPDDTVLDAFVAEVGRFDAPVQNTRRFVASRTTIEGVTVEA  
GDAILVVLAAANRDPVHRDPHRLMPGRAAGPNFGFGTGLHGCPGERIARAVTAGAFAAW  
LRAGGWPPRGGLTWNYRASTNVRMPKFDAAR

>Bxe\_A3593|KEGG|CYP153A10|[Paraburkholderia xenovorans]bxe|BP

MNTLVVDSSHVRLAPDALSQPVEDIDPSLPYRFQQQTHFAMFDRLRRESPVHYVKDSEYG  
PFWSVHRYNDIIDVEIDHATFSSDVKYGGMLIKDLPENMRRTSFINADPPLHDHQRRVVS  
PIVAPGNLNRLEHTIRREAADILDGLPRGETFDWVDNVSIELTGRVLCELMDFPRADRRL  
LTYWSDIVNVLDLEVGGEINTEEKRYVKLKECASYFGVLFKERMNSEPKDDLISMLAHSEY  
TKNMPEQEFLGMIVLLMVGNDTTRNSISGGLVALNQFPEQYAKLHNDPGLIPKLVPEIL  
RWVTPVTHMRRTATRDIEFRGKQIRQGDKVVVWYASGNRDSDDVIKDPYQFIIDRANPRLH  
LSFGFGIHRCLGNRLAELQLRVLWEEILKRQMLIEMMGEPVRKYANNITGVMALPVRIAA

>Bxe\_A2330|KEGG|CYP195A3|[Paraburkholderia xenovorans]bxe|BP

MTPATASDASTLARDFDLRHLNPAFHADPYPVYHALRAHEPVKRMPDGSFLFLTRFRDVQA  
VYRDPKTFSSDKTVEFKPKYGDSPLYAHHTTSLVFNDPPRHTRVRKLIAGALTARAIAAM  
EPGLVRLVDGLLDAAAARGRIDLIDEFASAIPEVIGNLLDVPHTERAPLRDWSLAILGA  
LEPSLSEAQLERGNRAVSEFIDYLRDLVARRRREPQDPQHDLVTRLIQGEAGGEQLSEAE  
LLQNCIFILNAGHETTTNLIGNGLVTLTQWPEQRAALLHEPSLIESAVEECLRFESSNQL  
GNRMATVDTEIGGVAVARGTPVTLICIGAAANRDPEQFADPDRFDIRDPNRHLAFGFGIHQ  
CAGLSLARLEARIAIGRFVQRFPAVRVNGEPTRGGRVVRFRGFAAVPVELEPAGRRTA

>Bxe\_C0290|KEGG|CYP220A1|[Paraburkholderia xenovorans]bxe|BP

MTFIYDPNDPDVRRDPHAVFRKLRETEPVHWSPKLSGWVVTSEYELASEVLTTNGTYSER  
FTAVQQHLSEEKRVTAAEVMRWFQHWMVFRDPPDHTRLRRHMANTLNIPVFDARRETVIS  
VVNELLDRI PVGDAFDFFQAFSLWMPGIVVADLLGVERDRLLEVQWSDMMTFIGSARG  
VPDKYERARRGANGMGTYFLDLIAKRAEPREDALSRLIASEVEGQRLSDDELVGCMVV  
LNGGHETTANLLNNSMLALAAHPQTVQHRLRQHPDEMAAAVEEFLRYDSPVLSIGRIVTED  
TELGDQEI AAGDRVFAMLVGANRDPEVFS DPDELRTSRNP NPHMAFGKGP HFCLGTPLAR  
LEGQIALTAILERFSSIELCEPVESIPWLNSLVTHGPTRLPLRLK

>Bxe\_C0599|KEGG|CYP226A1|[Paraburkholderia xenovorans]bxe|BP

MTSPA KSNAL ESASFESTASNYRGSDVDLNAIYRDMRRNSPVIAQDFMASLGVPNIAKLDP  
NRPTFTL FKYKDVMSVLRDAANFTSGFIAEGLGSFFDGLILTGLDGEAHRARALLQPVF  
LPEVVNRWRESKMEPIVRNEFIGPMVPQRRADLMHFGLHFPIRLIYSLIGFADDRPEQVE  
QYAAWALAILAGPQVDAQKAAIARKAAMEAAEALYAAIRSEVAVVRAKGAEGEDLISRLI  
RAEYEGRRLLDDHDIA TFVRSLLPAAGETTTTRTFGSLMTLLLERPALLERVKADRSLVSKA  
IDEAVRFEPVATFKVRQA AVDTGIGGVSI PKGAMVQCIVSSANRDEEVFENSETFDIDRK  
PKPSFGFGFGPHMCIGQFI AKVELQVAVNAILDLLPNLRLDPDRSPPKIVGAQLRGPDV  
HVVD

>Bxe\_C0631|KEGG|CYP226A2|[Paraburkholderia xenovorans]bxe|BP

MSTTLENPMLDLEAAYHAVSDTYRGPDIDLQALCREMRHKNPVMKGDFVATHLGIPTNAG  
ASAAKCEVT LFRYQDVLAVMRDATTF TNGFIAEGLGGFFDGLIILAMDGDAHRARGLLQ  
PVFMPETVNRWRPELDRVIREDFLAPLPN RHADLMDFGLYFFPIREMYALMGFPTDDTAK  
FNQYATWALAMVAGNQIDPGKIRIFGP IAAA AVKHLVDVMEVVLQRRAGADGNDLISR

LMRAEYEGHKLDDHEVTTFVRSLLPAAGETTTTRTFSSVITLLLERPALVERVRNDRSLIP  
RLIDEAVRYEPVATFKVRQAARDIEIGGVKVRSGGLVQCMVMSANRDEDVFENADTFDID  
RKPKPSFGFGGAHMCIGQFVAKIELQCAVNAILDLFPNVRLDPARPAPKIAGAQLRGAK  
SVPVIWD

>Bxe\_C0945|KEGG|CYP105T1|[Paraburkholderia xenovorans]bxe|BP

MTSAINDVRPQTTSTFPFARTGSPLHPPAEYARYRDGQPVTRVQMWDGRYAWIFTRMEDV  
KAVLSSPHFSVVPSKPGYPFLTPARAATVKSQYQTFITMDPPDHTRFRMLTRDFTQKRME  
ELRPQIAAYVNRLIDEMLARGSPGDLVSALALKLPVTVVSMLVGVPYEDHEDLVKWSGQR  
LDLEQNPTVSESAADNMLAYFDGLLQRKERDPGDGADMLSRVIEQIKPGHLSRLEAIHM  
VNLLYFAGHETTANQIALGTLSTFLDPRQRALLENPNPGLLKNAIEEMLRFHTISHYNCR  
VATADVEVGGTLIREGEGAYALIMAANRDPAAFPAPDRFDIERPNSQEHVAFSYGLHMCL  
GQPLARLELQVCFEALFRRLPRLRLAVPLEELPFKREMYVYGLHALPVTW

>DR64\_1290|KEGG|CYP153A10|[Paraburkholderia xenovorans]bxb|BP

MNTLVVDSSHVRLAPDALSQPVEDIDPSLPYRFQQQTHFAMFDRLRRESPVHYVKDSEYG  
PFWSVHRYNDIIDVEIDHATFSSDVKYGGMLIKDLPENMRRTSFINADPPLHDHQRRVVS  
PIVAPGNLNRLEHTIRREAADILDGLPRGETFDWVDNVSIELTGRVLCELMDFPRADRRL  
LTYWSDIVNVLDLEVGGGEINTEEKRYVKLKECASYFGVLFKERMNSEPKDDLISMLAHSEY  
TKNMPEQEFLGMIVLLMVGNDTTRNSISGGLVALNQFPEQYAKLHNDPGLIPKLVPEIL  
RWVTPVTHMRRTATRDIEFRGKQIRQGDKVVVWYASGNRDSVDIKDPYQFIIDRANPRLH  
LSFGFGIHRCLGNRLAELQLRVLWEEILKRQMLIEMMGEPVRKYANNITGVMALPVRIAA

>DR64\_7505|KEGG|CYP105T1|[Paraburkholderia xenovorans]bxb|BP

MTSAINDVRPQTTSTFPFARTGSPLHPPAEYARYRDGQPVTRVQMWDGRYAWIFTRMEDV  
KAVLSSPHFSVVPSPKPGYPFLTPARAATVKSQYQTFITMDPPDHTRFRRLMLTRDFTQKRME  
ELRPQIAAYVNRLIDEMLARGSPGDLVSALALKLPVTVVSMLVGVPYEDHEDLVKWSGQR  
LDLEQNPTVSESAADNMLAYFDGLLQRKERDPGDGADMLSRLVIEQIKPGHLSRLEAIHM  
VNLLYFAGHETTANQIALGTLSFLLDPRQRALLENPNPGLLKNAIEEMLRFHTISHYNCR  
VATADVEVGGTLIREGEGAYALIMAANRDPAAFPAPDRFDIERPNSQEHVAFSYGLHMCL  
GQPLARLELQVCFEALFRRLPRLRLAVPLEELPFKREMYVYGLHALPVTW

>DR64\_7815|KEGG|CYP226A2|[Paraburkholderia xenovorans]bxb|BP

MSTTLENPMLDLEAAYHAVSDTYRGPDIDLQALCREMRHKNPVMKGDVATHLGIPTNAG  
ASAAKCEVTLFRYQDVLAVMRDATTTFTNGFIAEGLGGFFDGLIILAMDGDAHRRARGLLQ  
PVFMPETVNRWRPELDRVIREDFLAPLVPNRHADLMDFGLYFPPIREMYALMGFPTDDTAK  
FNQYATWALAMVAGNQIDPGKIRIFGPAAAAVKHLYDAVMEVVLQRRAGADGNDLISR  
LMRAEYEGHKLDDHEVTTFVRSLLPAAGETTTTRTFSSVITLLLERPALVERVRNDRSLIP  
RLIDEAVRYEPVATFKVRQAARDIEIGGVKVRSGGLVQCMVMSANRDEEDVFENADTFDID  
RKPKPSFGFGFGAHMCIGQFVAKIELQCAVNAILDLFPNVRLDPARPAPKIAGAQLRGAK  
SVPVIWD

>DR64\_7847|KEGG|CYP226A1|[Paraburkholderia xenovorans]bxb|BP  
MTSPAKSNALESAFESTASNYRGSDVDLNAIYRDMRRNSPVIAQDFMASLGVPNIAKLDP  
NRPTFTLTKYKDVMSVLRDAANFTSGFIAEGLGSFFDGLILTGLDGEAHRARALLQPVF  
LPEVVNRWRESKMEPIVRNEFIGPMVPQRRADLMHFGLHFPIRLIYSLIGFADDRPEQVE  
QYAAWALAILAGPQVDAQKAAIARKAAMEAAEALYAAIRSEVAVVRAKGAEGEDLISR  
RAEYEGRRLLDDHDIATFVRSLLPAAGETTTTRTFGSLMTLLLERPALVERVKADRSLVSKA  
IDEAVRFEPVATFKVRQAQAVDTGIGGVSI PKGAMVQCIVSSANRDEEVFENSETFDIDRK  
PKPSFGFGFGPHMCIGQFIAKVELQVAVNAILDLLPNLRLDPDRSPPKIVGAQLRGPDV  
HVVWD

>DR64\_8143|KEGG|CYP220A1|[Paraburkholderia xenovorans]bxb|BP  
MTFIYDPNDPDVRRDPHAVFRKLRETEPVHWSPKLSGWVVTSEYELASEVLTNGTYS  
AERFTAVQQHLSEEKRVTAAEVMRWFQHWMVFRDPPDHTRLRRHMANTLNIPVFDARRE  
TVISVVNELLDRI PVGDAFDFQAFSLWMPGIVVADLLGVERDRLLEVKQWSDDMMTFIGS  
ARG

VPDKYERARRGANGMGTYFLDLIAKRRAEPREDALSRLIASEVEGQRLSDDELVGCMMMV  
LNGGHETTANLLNNSMLALAAHPQTQVQHLRQHPDEMAAAVEEFLRYDSPVLSIGRIVTED  
TELGDQEIAGDRVFAMLVGANRDPEVFSDPDELRTSRNPNPHMAFGKGPHFCLGTPLAR  
LEGQIALTAILERFSSIELCEPVESIPWLNSLVTHGPTRLPLRLK

>Bphy\_0979|KEGG|CYP195A6|[Paraburkholderia phymatum]bph|BP

MNPSREAGIARAFDLQHLDASFHADPYPFYHALRTHPEVKRMPDGSLFLTRYRDVQAVYR  
DPKTFSSDKKVEFAPKYGATPLFEHHTTSLVFNDPPLHTRVRKLIAGALTARAIAMEDG  
LVRLVDGLLDSAAARGEIDLIGDFAAAIPVEVIGNLLDVPHDERAPLRAWSLAILGALEP  
ALTPAQHERGNRAVTEFVAYLEDLVARRRAAPGDPQHDVLTRELIVGEAGGEQLSEVELLQ  
NCIFILNAGHETTTNLIGNGLVTLSSWTEERAALLREPELIESAVEECLRFESSNQLGNR  
MTMRDTEIGGVPVTAGTPVTLCIGAANRDPEQFAEPDRDFDIRRTPNRHLAFGFGIHQCAG  
LSLARLEARIAIGRFVRRFPSYRLSGAPTRGGRVRFRGFAAVPCAVE

>Bphy\_5447|KEGG|CYP133C2|[Paraburkholderia phymatum]bph|BP

MKFTDLSSPAYFDNPYPFYDGIRSAGAFVPLAPGIFLTGRHAVIDALLPDRRMGKTYMPS  
VVVRYGETAREQPVFQALERTFLMMNPPAHTRLRALLMKAFNARQIETLRTIAEQTTDSL  
IDAMQKGKREVDLVSGFAMPLPLQIICRLLDVPVEEGERFGEAASLLVSAFDLAPLSPEAL  
ARANQAALDLEQYFRAVIAERRAAPGHDIVSALIHAEEGGERLSEDEVVSNVILLFVAGH  
ETTSNMLGNALIALHRHPSQLERLTSNLSLVPQAVAECARFDTAVQMVVRTAFDDIDVGG  
QTLPRSSIVFMLLGSANRDPERFDAPDTLDIGREASGHLLTFGAGIHYCLGARLAMMELE  
IALRKLMTRVPQLRLTNLDALQWRRRNLRGVETLIAAL

>Bphy\_6307|KEGG|CYP107DQ1|[Paraburkholderia phymatum]bph|BP

MYNVADSSRSASPTLPAAGFSPSYDPLIPHPEHVKDPYRVYAELRSNAPLYRSPHGVWIA  
SGYEEVSTMLKSPDFGRGYFYFDNMAKRLGEAMVSQPVYASAREMMVMKDGPDLRLRGL  
VAHFFSHRNVEALRPFMRVMEGLIDKALEKSSFDVMTDIAFPLPSAVICRLVGLPEADW  
PRFRQRSTNGSRALEPAPLSPLELAEQNHAVEEARDYFSWLIELRKREPGDDLATLLVNA  
EAAGQASREEVIENLRMMFVGGQETTNTIGNGLLALHRHPDQLQALKSDRALIPDAVTE  
IVRYDSAVQITPRQARCDMEMCGAAITAGDTILCVVASANRDERAWVQADRFDISRKRNY

PLSFGGGPHYCLGAQLGMVETEVALAALLDRMPNLALDIADPRWLPGTVVFRGLQSLPAH  
A

>Bphy\_7766|KEGG|CYP108S3|[Paraburkholderia phymatum]bph|BP

MNMSNYDLPKDMANHLVDPHYTNPDR LHET YAWARANNPVGRAMADGHDPFWVVKHAD  
VSMISRDTV SFCNGEYSVVC RPKASIEHVISATGSPNIVRSLVHVDGDEHKNL RALTQSW  
FMPNSIIKLDGRIRSLARAMTAKLLQQSGQVIDFANDVASHYPLNVIMDILGVPQEDSLR  
LLTLTHEMFGSEDAEYKREMQRQGDSSSAMGKALLSVVADFKDYFKRLTEDRRANARNDI  
ASVLANAVVNGQPIDERTLLGYYVIIAAAGHDTVSSSISVAMWALS RFPELLPRLQADRS  
LIPQFIDETCRYASPV RHFMRTATVDTDVRGRTIRKGDWLMLCYGSANFDEEVFPEPFNF  
NIDRKPNRH LAFGVGAHVCLGQHLANMEMRILFEELIPRLRLIEPAGEIEFIASSFVGGP  
KHLPVRCVMQ

>BC1002\_1423|KEGG|CYP195A3|[Paraburkholderia atlantica]bge|BP

MTPPTASDASSLARDFDLRDLSPA FYADPYPIYRALRTYEPVRRMPDGS LFLTRFRDVQA  
VYRDPQIFSSDKTVEFRPKYGDSPLYAHHTTSLVFNDPPRHTRVRKLIAGALTARAIAAM  
EPALIRLV DGLLDAAAQRGRIDLIGEFASAI PVEVIGNLLDVPHDERAPLRDWSLAILGA  
LEPSLTDAQFERGNRAVSEFVDYLRGLVVTRRREP GDPQHDLVTRLIQGE GPDEQLSEAE  
LLQNCIFILNAGHETTTNLIGNGLVTL SQWPDERAALLREPELIGTAVEECLRFESSNQL  
GNRMTTV DTEIGGVAVARGTPVTL CIGAANRDPEQFAEPDRFDIRDPNRHLAFGFGIHQ  
CAGLSLARLEARIAIGRFVQRFPAYRVDGEPTRGGRVRF RGFASVPILLEP

>BC1002\_6864|KEGG|CYP108S5|[Paraburkholderia atlantica]bge|BP

MSMTNYDLPKDIANRLVDPQSYTNLDGLHEIYAWARANNPVGRAMADAHDPFWVVKHAD  
VSMISRNNALFRNGDYSVVC RPQASIAHVIAATGSPNIVRSLVHVDGDEHKRL RALTQSW  
FMPNSVVILEARIRSLAHLMIGELVQQSSSVIDFANDFALHYPLNVIMDILGVPQEESPR  
MLRLTQEMFGSEDAEYKREISRQGGAGSAIGKALLSVVADFKGYFDRLTEDRRKNPRNDI  
ATLLANAVVDGQPIDEATRLGYYVILAAAGHDTVSSSISVAMWALCQFP HLLPRLKADPS  
LIPQFIDESLRYASPV RHFMRTAAAE TNLRGRTIRKGDWLMLCYGSANRDEEVFPDPFVF

DIDRRSNRHIAFGAGAHVCLGQH LANMEMRILFEELIPKLQFVEPVGDVEFTTSNFVSGP  
KHLPIRCVLQ

>BU PH\_02254|KEGG|CYP195A3|[Paraburkholderia phenoliruptrix]bpx|BP

MPTATAGDPAALARDFDLRR LSPDFYADPYPVYHALRAHEPVKRMPDGS LFLTRFRDVQA  
VYRDPKTFSSDKTVEFRPKYGDSP LYTHHTTSLVFNDPPRHTRVRKLIAGALTARAIAAM  
EPGLVRLVDGLLDAAAERGRIDLIGDFASAI PVEIIGNLLDVPHAERAPLRDWSLAILGA  
LEPSLTDAQFERGNRAVSEFVDYL RDLVARRRRAPGDPQHDLVTRLIQGEAGGEQLSEEE  
LLQNCIFILNAGHETTTNLIGNGLVTLTECPEQRAALLAEPALIESAVEECLRFESSNQL  
GNRMATVDAEIGGLPVARGTPVTL CIGAANRDPEQFPDPDRFDIRREP NRHLAFGFGIHQ  
CAGLSLARLEARIAIGRFVQRFP SYRLDGEPTRGGRVRFRGFAEVPLLCR

>BU PH\_00139|KEGG|CYP1485A2|[Paraburkholderia phenoliruptrix]bpx|BP

MHTYSAMTCSMPEPESFSVLPSI IGTGSADPYPLYEWLRAHRPLCRDASGVWLASSHALV  
TRILDDARFSARPPPGAVPLDDPLGYTNMVVFQTGEAHERLRRFLAPLFSRKALLSLQAF  
IDDEVARLIDQCERLPRFDLVAHIASVLPVRTICRLLGFPDEHGASCLQASAGAWQLISG  
APMSAEERALA AVQTETFIAQVESFMLAIEPDVVPDHAAARFLRLEQEGGIGRRDMLVNV  
LFLFIAGYGTTLLSIGNSIAALLRAPRAWQALKDDVSLVAQAVRELYRYDPAVQSVFRIA  
WDDVEIDGCRIRRGERV MPLIGAANRDPAAFAAADEIRFEREAGRSLTFGAGPHSCMGLA  
LARMQLESLLSALMRRMPGLRLAPGEQPRQQHGSFHGYDRLMVEH

>BU PH\_08319|KEGG|CYP108S4|[Paraburkholderia phenoliruptrix]bpx|BP

MNMSNYDLPKDMANHLVDPHYYTNPDR LHETYAWARANNPVGRAMADGHDPFWVVKHAD  
VSMISRDTV SFCNGEYSVVC RPKASIEHVISATGSPNIVRSLVHVDGDEHKNL RALTQSW  
FMPNSIIKLDGRIRSLARAMTAKLLQQSGQVIDFANDVASHYPLNVIMDILGVPQEDSLR  
LLTLTHEMFGSEDAEYKREMQRQGDSSAMGKALLSVVADFKDYFKRLTEDRRANARNDI

ASVLANAVVNGQPIDERTLLGYYVIIAAAGHDTVSSSISVAMWALS RFPELLPRLQADRS  
LIPQFIDETCRYASPVRHFMRTATVDT DVRGRTIRKGDWMLCYGSANFDEEVFPEPFNF  
NIDRKPNRH LAFGVGAHVCLGQYLANMEMRILFEELIPRLRLIEPAGEIEFIASSFVGGP  
KHLPVRCVMQ

>Bphyt\_1856|KEGG|CYP195A3|[Paraburkholderia phytofirmans]bpy|BP

MPPATASDASTLARDFDLRHLDPAFHADPYPVYHALRAYEPVKRMPDGSFLTRFRDVQA  
VYRDAKTFSSDKTVEFKPKYGDSPLYAHHTTSLVFNDPPRHTRVRKLIAGALTARAIAM  
EPGLVRLVDGLLDAAAERGRIDLIGEFASAI PVEIIGNLLDVPHAEREPLRDWSLAILGA  
LEPSLTEAQFERGNRAVDEFVGYLRDLVARRRRAPGDPQHDLVTRLIQGEEGGEQLSEAE  
LLQNCIFILNAGHETTTNLIGNGLVTLTQWPEQRAALLHEPSLIESAVEECLRFESSNQL  
GNRMATVGTEIGGVAVARGTPVTL CIGAANRDPEQFAEPDRFDIRDPNRHLAFGFGIHQ  
CAGLSLARLEARIAIGRFVQRFPYRLDGEPTRGGRVVRFRGFAEVPLELEPVASRTA

>Bphyt\_2741|KEGG|CYP1258B1|[Paraburkholderia phytofirmans]bpy|BP

MNASLQAVRSGSPDTVVIARTKELADDGIKAANIDGIDLIVLRHGNAISIFQGRCPHQGT  
LLSEGT VKDGVLACRAHWQFDCSSGCKQGPSSSNLKRFD AIVENG EVKVD RNEVRAWNA  
QRPAPAVIMPCRESAVRSLAQLPGPKRV SFLGNTLQLRPEKLHLVLEEWCREFGPVYTFR  
LIGRPFVAIADPILISQVLRDRPGAYRRWNVIETVARELGINGVFSMEGD AWR RQRQLVA  
KALDPLHLRAFFPLLCEMTRLLQRWEKAERERQIIDIQKDL MRYTV DVTTNLAFGYDMD  
TIESEGDVIQRHLEVVFPMINRRINAPFPYWHYVKLAADKTLDRALIAVQALTKDLIAAN  
RARLAQRPETDTMPTNLLEALLMAQH DGEAPLTDDEVLANVFTILLAGQDTTANTIAWVA  
YFIASLPDVQRKMQUEEVDAVIGSAAMLEDFDAGDALLYVNAVISESMRLKSVTPVLAVEP  
NYDVQVGDI AIPKGAVLSLLTREAGLQQGGHSAPDVFD PARWLTGES AASHHRAGFMPFG  
SGPRLCPGRSLALMEVRS AVAMLCRNFDLLLVDNASEVEEVFAFSMVPRNLRIELRRRG

>OI25\_3427|KEGG|CYP195A3|[Paraburkholderia fungorum]bfn|BP

MPPATASDASSLARDFDLRHLSPSFHADPYPVYHALRTYEPVKRMPDGSFLTRFRDVQA  
VYRDPKTFSSDKTVEFKPKYGDSPLYAHHTTSLVFNDPPRHTRVRKLIAGALTARAIAM  
EPGLIRLVDGLLDAAAARGRIDLIGEFASAI PVEVIGNLLDVPHAEREPLRDWSLAILGA



LEPSLSEAHLEGRNRAVSEFIDYLRDLVARRRREPQHDVLTRLIQGEQGGEQQLSEAE  
LLQNCIFILNAGHETTTNLIGNGLVTLTEWPEQRAALQHEPSLVESAVEECLRFESSNQL  
GNRMATVDTEIGGLAVPRGTPVTLTCIGAANRDPEQFAEPDRFDIRRDPNRHLAGFGFIHQ  
CAGLSLARLEARIAIGRFVQRFPAYRLDGEPTRGGRVRFGRFAAVPVELEPTSGG  
>OI25\_3857|KEGG|CYP226A18|[Paraburkholderia fungorum]bfn|BP

MSTPAATTSLESAGVADNYKGSVDLHAIYRDMRRNSPVIAEDFMARLGVPNIAGLDA  
NRPTFTLFKYKDVMSVLRDATHFTSGFIAEGLGAFFDGLILTGMGDAHRRARSLLQPVF  
MPDVVNRWRETKMAPIVRSEYIEPMVPKRRADLMDFGHLHFPIRLIYSLIGFPDNRPEQIE  
QYAAWALAILAGPQVDAEKAAQARKAAMEAAQALYDAVKLEVIEVRKNGAQGDDLISRLI  
RAEYEGRSLLDHEVATFVRSLLPAAGETTTTRTFGSLMVALLERPELLERVRADRSVLPKA  
IDEAVRFEPVATFKVRQAAQDTEIGGFRIPKGAMVQCIVSSANRDEEVFENSESFDIDRK  
LKPSFGFGFGPHMCIGQFIAKVELAVAVNTILDLLPNRLDPEMPRPRIVGAQLRGPHAL  
HVIWD

>OI25\_3864|KEGG|CYP226A17|[Paraburkholderia fungorum]bfn|BP

MNAPTQEGTLTDLEAAYHAVSDTFRGPDLDLQALCREMRHTQPVMQGDVATRLGVPTNA  
GAKAAQCAVTLFKYQDVMAVMRDATTFTSGFIAEGLGAFFDGLIVLAMDGDAHRRARGLL  
QPVFMPETVNRWRPELDRVIRQDFLEPLVPNKQAEMLDGLYFPPIREMYALMGFPTDDTA  
RFNQYATWALSMVAGNQIDPDKIRIYGPLAAAANKHLYDAVKEVVVQRRAEAGHGDDLIS  
RLMRAEYEGHMLDDHEVTTTFVRSLLPAAGETTTTRTFSSVMALLERPELVERVRNDRTLI  
PRLIDEAVRFEPVATFKVRQAARDVEIGGVKVPKGGLVQCMVISANRDEDAFDNPDIFDI  
DRKPKPSFGFGFGTHMCIGQFVAKVELQCAVNAILDLFPNVRLDPGKPAPKIAGAQLRGA  
KSPVVWD

>OI25\_5065|KEGG|CYP194C1|[Paraburkholderia fungorum]bfn|BP  
MSDTTNAGNVKDGYDIFAGDYANDPDALWAAMRKGCPVAHSDKWGGSWVTRYDDVRDI  
AHDGARFSSRAVEVAGPIPEIGHLEFLPPLTSSPDHKAHRDLLAPFFTPAKIAELEPFV  
RDEARRLATAIAERGEQDAVGDFARPLALSVISHILKVPLDAQNRFDWVVRVLVRLGPLD  
QKVRSAVVQEKLAYLEKLLERASAPGDDLISYLAHATLNGEPLSRKHKLGSLFLLVLGAG  
ADTTWSAMGASLWHLASHADDRAQLLAQPDMMRTTAVEELLRAYAPVSIARLTSEPVELH  
GRCIAAQERVILPLAAANRDPAVFDEPDTVKLDKRNRHLTFSSGEHRCLGSNVARLELR

VALEEWLRVMPNFHLTAPDAVEWTAGQTRGPEQVLIIVDR

>OI25\_5996|KEGG|CYP1155A1|[Paraburkholderia fungorum]bfn|BP

MPPLREFLRLAHATGTENEGRSAWQTGSDRYVPMLQILLGFLRRYWPIPRLFGWAAVTLSD  
DDVEEVLSLPNVFSTPFAEEMARLNDGARPGTQFLAMDDAHADAQVRQVMDAFRREDVK  
ERVGDVANRKAANAIVAAANGRLEAIGGLITQVPLDICVDYYGIAIDDPKRFTAFMVVSG  
HLFGPPPVVQNDAVDEAAAYVRQVVSQAFAERQQPRGTHTVIGRLLGTVKGGGITYLEA  
HAFLSGMILGFVPTDTMAGGHILEMLLRPGFLAASQAAARAGDDVLLGRCLFEALRFMP  
INPGPFRVCAADYIVAAGTSRETRIRKGTKVLACTMSAMFDSRKVNNPFNFVPGRPASDL  
MNFSGFMHWCVGAFIAQTQIVQTFKPLLLRSGLRRAPGPDGQLKLRHTFPASLVVEFEVA  
S

>OI25\_7436|KEGG|CYP289A14|[Paraburkholderia fungorum]bfn|BP

MNEKPINDWDPRSEDVTRDQAAAYDDMRHRCVVAHSDYLNLSLFRHDDIMRVLNDPETFS  
SAVSSYLSVPNGMDPPEHTRYRSIIEPYFSPPRMMIFEPVCREIAGSLANGLSRGGEIEF  
NARFAQDFAMNIQCAFLGWPKELRTPLLHWIRKNREATLTGDRIALDRVAVEFDYIKGL  
LVQRRKSGANAPDDITTSLLRERIGDRLHDDIIVSVLRNWTVGELGTIAACVGILAHYL  
AEHPDIQRRRLRAQPSLLPEAIDEILRIRAPLIANRRISTRPAEIGGRAVPAGQRITLIWA  
SANRDETVEFGEPDEFRLDRDPANNLLYGSGIHDCPGAPLAQLELRIGIEELLASTHWIAL  
VPGCPPTPSIQPRGFLHCHCTSSSESPiARPTCKVPSCl

>K788\_0007982|KEGG|CYP195A6|[Paraburkholderia caribensis]bcai|BP

MAGVTRIDVMLATTCKHHSAGMVHTEGSKRFNRGSTAVSAALAAKIKKETPMAPSNA  
TSDADIARRFDLRHLDASFHADPYPVYHALRTHFPVKRMPDGSFLTRYRDVQAVYRDPKTF  
SSDKKVEFAPKYGATPLFEHHTTSLVFNDPPLHTRVRKLIAGALTARAIAAMEDGLVRLV

DGLLDRAAGRGEIDLIGDFAAAIPVEVIGNLLDVPHDEREPLRDWSLAILGALEPSLTPA  
QHERGNRAVTEFVAYLKDLVARRRAAPGDPQHDVLTRLIQGEQGEGGGEQLSEVELLQNC  
IFILNAGHETTTNLIGNGLVTLVWTEERDALLREPALIESAVEECLRFESSNQLGNRMT  
MIDTEIGGVPVAAAGTPVTLCIGAANRDPEQFAQPDRFDIRRAPNRHLAFGFGIHQCAGLS  
LARLEARIAIGRFVRRFPAYRISGEPTRGGRVVRFRGYAAVPCAVE

>K788\_0003175|KEGG|CYP133C2|[Paraburkholderia caribensis]bcai|BP

MKFTDLSSPAYFDNPYPFYEGIRSAGAFVPLAPSIMLTGRHAVIDALLPDRRMGKTYMPS  
VVARYGESAREQPVFQALERTFLMMNPPHTRLRALLMKAFNARQIEMLRRTIAEETDSDL  
IDAMQKGKREVDLVSEFAMPLPLQIICRLLDVPVEDGVRFGDAASLLVSAFDLAPMSADAL  
ARANQAALDLEQYFRGVIAQRRATPGHDIVSSLIQAEEGGERLSEDEIVSNVILLFVAGH  
ETTSNMLGNALIALHRHPAQLERLRGDPSLVSKAVAECARYDTAVQMVVRTAFDDIEVEG  
QTLPRGSIVFMLLGSANRDPERFDAPDTLDIGREPSGHLLTFGAGIHYCLGARLAMMELE  
IALHKLLTRLPLQLRLTNLDALQWRRRNLRGVETLLAAL

>K788\_0004290|KEGG|CYP1049A4|[Paraburkholderia caribensis]bcai|BP

MRNVHQGMMSTWLCDTAKAGDPIEFRGPMGSFYLRPIERPVLFLAGGTGLAPFLSMLDKI  
VEDGGSPYPIHMILGVNSDADLVGIDRLEIYAQRLPNFTYACTVASPDSAYPNKGYVTHH  
ISASRLNGGDADVYLCGPPPMVDVRSFSLSSEGLTPRNFYYEKFAGTGLVVQTGEERIAP  
VDVDEAFDLRMVLELGAAQLTMGRLSSEQLIIFRQLAEATAQFVSGRRFTDVPRYIEANH  
AFHKFTIEASGNAQLIALYRQLAVQDYIARALTGQVEIVGDIVQQHRDIVAAAFELGDLNA  
ARDVIALHALHSRATMSRALERMAMGKTAPMVAAPPSLPSAVPESAPQVCPFTAKTLPSY  
SHELDWPEGLEPFKVVDDGSQGDYPYAHYRWMREHAPVLRCSATSDVWFLSRYDDVYQAI  
RNPKLFSSEVVSPPPLTFLTLFDAPDHSRLRKVVQPSFLPLALDPFIGQIAQRAEDLLDA  
MIANGGGDVVNDFAIPLSISTISTMIEVPNEDEEKMKFWSDETFSYFGR LARNAPGTGTD  
EQSAQAFFAYLKQALERLALTDSSIGGHIARMWKDGLLSEKEAKELCAFVFIAGHDTT  
ILVANAFRMFAEQPELLGRIRENPADADRFVEEVARYRGTVQRVSRITTEATTVAGVDLP  
KGAVVRLLLSAANRDSRKFAEGETFDIDRDSSGHLGFGNGMHKCLGAPLAKLETIATKV  
LARKVGNIAFDPPARPIQYVRGNNLTNSGPEHMFVKIGGLSA

>BJG93\_05715|KEGG|CYP195A3|[Paraburkholderia sprentiae]pspw|BP

MTLASASDASSLARDFDLRDPDPAFYADPYPVYHALRTYEPIRRMPDGSIFLTRFRDVQA  
VYRDPNTFSSDKTVEFRPKYGDSPLYAHHTTSLVFNDPPRHTRVRKLIAGALTARAIAAM  
EPALIRLVDSLDDAAAQRGRIDLIGEFAAAIPLEVIGNLLDVPHGERAPLRNWSLAILGA  
LEPSLTGAQFERGNRAVSEFVDYLRGLVARRRCEPGDPQHDLVLRILIQGEGPDEQLSEVE  
LLQNCIFILNAGHETTTNLIGNGLVTLSEWAEERAALRREPALIASAVEECLRFESSNQL  
GNRMTTVDTTEIGGVALARGTPVTLTCIGAANRDPEQFAQPDRFHIRRDPNRHLAFGFGIHQ  
CAGLSLARLEARIAIGRFVQRFPAYRLDGEPTRGGRVRFGRGFASVPVLLAP

>BJG93\_16600|KEGG|CYP108S7|[Paraburkholderia sprentiae]pspw|BP

MSMPNYDLPKDIANHLVDPQSYTNLNLRLHETYTWARANNPVGRAMADGHDRFWVVTKHAD  
VSMISRENVLFHNGDYSVVCPRASIEHVISTTGSPNIVRSLVHVDGDEHKSLRALTQSW  
LMPNSILELDDRIRSLANMTIAKLLHSGQVIDFANDFALHFPLSVMMDILGVPQQDSPR  
MLTLTQEMFGSEDAEYKREVQRQGDASSAMGKALLSIVADFKDYFDRLTEDRRKNPRNDI  
ASLLANAVINGQPIDEATRLGYVYVIAAAGHDTVSSSISVAMWALS RFPELLPRLQADCS  
LIPQFIDETLRYASPVRFHMRATATADTNVRGRTIRKGDWMLCYGSANRDEQVFPDPFAF  
NIDRKPNRHLAFGVGAHVCLGQHLANMEMRIFFEELVPRLRLIEPAGEIEFVASSFVSGP  
KHLPVRCVVHPH

>BJG93\_29335|KEGG|CYP101F1|[Paraburkholderia sprentiae]pspw|BP

MSPTKDWTVPDHVPRELVDVFDYMNPPGVQDDVHIAWKTTLHTGPDIVWSPYHGGHWIATR  
GEDIEAMQKDHTRFSHRSVNIPPLNETRLVPLELDPPEHTAYRNLITPAFLPQAIASLEN  
DVRNLAIELIDTLAARGECEVSEFSKILPIVIFLRLADLPLSDREQLEWAEWAVRGNV  
EERNESQHRLVGYISTWVEKRQAEAGGDLVSLVANAQIEGKPISPERMFGMFIVVLFGGL  
DTVASMMGFIARFLAENPAHRRQLIENPDLMISSVDELIRRFVANTARLVTQDMEYKGI  
QFRKGDQIQLPNSLFGGLDDRKFNDPLAVDLTRKPVIIHAAFNGNGPHRCPGSFLARTEIKVF  
LQEWLKRIPDFRIREDDKPRCGSGSVNGMLYLPLVWDVAR

>BJG93\_29300|KEGG|CYP1111A3|[Paraburkholderia sprentiae]pspw|BP

MAGVLRLEDFDDPKFNPFFEDSLAYGADADPYPRIAELEKAAVQEGDYRVLMGGAADLT

MSDVAHYSVFGYDEVSKILGDPATFSNKS YERNLGISFGRSISTMDAPEHPRYRRIFQKA  
FLPNTVAAWGDTLVDPVVS ELMSTFMDRGHADLVSEFTLHYPFNI IYRQLALPPEDVKIF  
HKLAI AQTLVSIDVEHGVEASTKLGAYFARLVDERRSHPGDDLVS SLATAEVDGERLPEE  
VVISFLRQLVNAGGDTTYRATSVLLLALLRNPFVQLEAVRQDRTL VAPAIEEALRWDGPVL  
MQSRMATRDVTLGGVEIPAGAFLDVVAGSANRDP SRFADPKFDIHRKAVHRHFAFAYGP  
HVCIGQHLARVEMTRALNAILDRLPNLRLDPAAPAPQINGIMMRVPHSIPVIFG

>BJG93\_29165|KEGG|CYP101N1|[Paraburkholderia sprentiae]pspw|BP

MSVAGHGVTP ELAPVPAHVLP ERVFDID IYNPPGAEDDYHLSLKRLHAEGIPDILWTPRN  
GGHWIATRGDDIYHILKDYENFSSKQLTVPLVEHQPLPPIFFDPPQHTAYRALIAPAFMP  
QAIGKLEEKAREMAIELIDGFYPKGEVEFVSGFAQHLP IGI FMNMVALPAEDREYLLGLA  
DKMVRPVDANEKLQALGAIFQYLGVKVAERRANPGDDLISKIVHSNIDGRSLTDDEV RGL  
CGLVLIGGLDTVASAMGFIARFLAGSPAHRKQLIDNPDLTQKAVDELLRRFPV VNQGRRI  
THDFEYNGVAMKAGDMIIMPTTLHGLDERKFDDPLNVDFTRPTPIHSTFGNGAHRCPGSF  
LARVELKVFLQEWLKRIPDFQIKPGEKAGVHGGVNGTLYRLPLVWQVAR

>BTO02\_24655|KEGG|CYP1220A18|[Paraburkholderia sp.]para|BP

MSTTASGNTNRTDGTRLRQLTDLPSPKGLPIIGNLHQVSLRTFHLNLERWGRELGTPYTF  
RMPGQQIVVLGDTDHVQGISRERPHRYRRFKPVETVLA EFGANGLFSAEGA AWE PQRRLV  
MQALSIPHIRAVYPTLADITGRLYTRWMRAAQEQRTVDMVEEMKRYSDVTSALAFGEDP  
RTL ERDTNVIQ EHLKLIMPALMSRTSAPFPYWHYVKLPRDRRLDRALIEIHRYVRRMMER  
ARERM RDDPSEMPRNLL EAMLAMRDM PDSGITDDQVSANVLTMLLAGEDTTANSLAWSTM  
FIATDEPLQARLAKDARAVLGSAPVCTDYAKLKELDVFEAVCTETGRFKPVAALSSFEPL  
EDVTMGDVLVPAGTFMFFLNRPAMHN PANFVNPERFDPDRWLQARDPARGAHEQRAYLQF  
GAGPRVCPGRHLAGVEMRAALSMLAANFEAKLAVDASEIEEINDFIMKPSKMPMNLTIRP  
RAE

>BTO02\_25280|KEGG|CYP1220A19|[Paraburkholderia sp.]para|BP

MADLQFDAPPTLRTVADLPCPRGVPLLGNLFQMAPAKLHLTLEQWARQFGSPYRVQLGTI  
PVTVWTQADLFQTVMRERPHLYRRFAPMESVMAELGGNGVFSAEGAAWEPQRRLLVMRALS  
FPNVKSFFPTLAAITGRFLVRLQDAAKERRTLEMTKELKRYTVDVTSTLAFGEDPHTLER  
ERGVIOEQLALVPPALMRRVTALFPYWHYFTLPEDRRLARAMVEVHGYYIRQMIERTTERM  
HESPDAPPRNLLEAMLAARNEPDSTVTDEQISANVLTLLVAGEDTTANAIWALMYVAAD  
DRLQQRLFEQSRVAFGEAGICPDYDALKHLDLCEAVCNEALRLRPVAAIQTFEPLSDVQI  
GGVAIPTGTRMLFLTRPAMLDPLNFAHPERFDPDRWRHPRDPSEGAHELKAYLTFGAGPR  
VCPGRYLA AVEMRLVLSMMLRHFEIELAIDPAKIEEVSAFTMVPNTMPVRLKPRS

>CJU94\_29980|KEGG|CYP1220A16|[Paraburkholderia aromaticivorans]parb|BP

MDTVSSSHIRYRQVSDLPCPRGLPFFGNLHQLPPTRLHLVLEQWARELGSPFRFQICRMP  
VTVWTDPELCQTIMRERPHRYRRYASIESVLEEIGSNGLFSAEGAAWAPQRKLIMHSLSI  
PHIKAFYPSLKAITERLYLRWQRAAARGEVVEMTEDLKRYTVDVTSALAFGEDPRTLEQD  
RGVIOEHLALIFPMLMNRINAPFPYWRYVRLPRDRALDRSLIEVHRYVRNMMSRARERM  
DEPSESPRHLLLEAMLTMRDAPQSDLTDDQVAANVLTLLLAGEDTTANSIAWTLTLYVAADS  
ALQQRLFDSSRGVLGSAPVCPDFASLKQLDLFEAVCTETGRLRPVAAVNSFEPLEDVCLA  
DILLPAGTKMFFLNRPATIDARNFSNPLQFDPDRWLHDGSRARTTHDSRAYLQFGAGPRV  
CPGRYLA AVEMRLVLSMLMANFSIRMAVDPDTIREVTAFTMVPSAMPVRLSTRAT

>C2L64\_08965|KEGG|CYP195A6|[Paraburkholderia hospita]phs|BP

MHPSNATSNDADIARQFDLRHLDASFHADPYPVYHALRTHPEVKRMPDGSLFLTRYRDVQ  
AVYRDPKAFSSDKKVEFAPKYGATPLFEHHTTSLVFNDPPLHTRVRKLIAGALTARAI  
MEDGLVRLVDGLLDRAAERGEIDLIGDFAAAIPVEVIGNLLDVPHDEREPLRDWSLAILG  
ALEPSLTTEQHERGNRAVTEFVAYLKGLVARRRAAPGDPQHDVLTRLIEGEANGEQLSEV  
ELLQNCIFILNAGHETTTNLIGNGLVTLVSWTDERDALLREPSLIESAVEECLRFESSNQ  
LGNRM TMVDTEIGGVPVAAGTPVTLCIGAANRDPEQFAQPDRFDIRRAPNRHLAFGFGIH  
QCAGLSLARLEARIAIGRFVRRFPSYRISGEPTRGGRVFRGAAVPCAVE

>C2L64\_25710|KEGG|CYP133C2|[Paraburkholderia hospita]phs|BP

MKFTDLSSPAYFDNPYPFYEGIRSAGAFVPLAPSIMLTGRHAVIDALLPDRRMGKTYMPS  
VVARYGESAREQPVFQALERTFLMMNPPTHTRLRALLMKAFNARQIETLRTIAEETDSDL  
IDGMQKGPEVDLVSEFAMPLPLQIICRLLDVPVEDGVRFGDAASLLVSAFDLAPMSADAL  
ARANQAALALEQYFRAVVAQRRATPGHDIVSSLIQAEEGGERLSEDEIISNVILLFVAGH  
ETTSNMLGNALIALHQHPAQLERLRGDPSLVSKAVAECARYDTAVQMVVRTAFEDINVDG  
QTLPRGSIVFMLLGSANRDPERFDAPDTLDIGRDP SGHLLTFGAGIHYCLGARLAMMELE  
IALHKLLTRLPLQLRLTNLDALQWRRRNNLRGVESLIAAL

>C2L64\_30050|KEGG|CYP105T10|[Paraburkholderia hospita]phs|BP

MTDDTSQQRCPLESDTFWPRAAECPLHPPPRYASVRESEPIRRVKTWDGSSVWVVTMRK  
DFREVLTS PHFSASPETHGYPSVSPARAAQSRSYQTFITMDPPEHGQYRRTLTKEFMMKR  
IDELRPFFVQSTLDALLDQMIAGAPSDFIQDVALPLPSVVISIMLGVPYEDHARLQMLSS  
NRMNLDISPELLTQSAQEMEYIDRLLREKEQHPEGENDLLCRLAVEWINTGKLSHADAV  
QMGALLYLAGHETTANQIGLGLLSLLQDSQQTAALIAEPSLVRGAVEEMLRFHSITHMNS  
ARVATADVMIGGQLIRKGEVGFAPVQAANHDPEAFPEPDRFDIRRDTRSASHVAFSFGVH  
QCLGQPLARLELQVVFETLFKRLPSLRLAVPFDELEFKRNGNVFGLIALPVEW

>C2L64\_30060|KEGG|CYP105T9|[Paraburkholderia hospita]phs|BP

MNMSETTLKCPFATESFPWPRDSAAPLIPPPQYARLREKATVVQVELWDGSLAWLVTDME  
HFREVMTS PHFSASPLTPGFPFISPSRAAQSKSYQTFITMDPPEHGQYRRTLTKEFMAKR  
MQELRPLVQQSLDRLLDEMESKGAPADFI SGVALPLPSLVISIMLGVPYEDHDKLQKWSG  
DRMDLSIAPEALTQSAKSMSQYIDALLLEKERNPGDGSDLLSRMAIEWINPGKVSHADAV  
QMATLLYLAGHETTANQIGLGLLSLFQHPEQRDALMADGSLVKGAVEEMLRFHSITHMNS  
NRVATEDVMIGGQLIRKGEVGLALLHGANDPAAFPEPERFDIRRDTKDQSHVAFSFGIH  
QCLGQPLARLELQVVFEMIFKRFPNLRLAVPADTLHYKDKSFVYGLKALPVSW

>C2L64\_30120|KEGG|CYP105CV2|[Paraburkholderia hospita]phs|BP

MSGCPFSKPAFFPMQRQCPFLPPGEYRDFQQQPGPVKVQMWDGKDAWLFTRYDDVRAVLGD

NRFSGDPHVSGFPSSLAARNAVLDLLEPAFIRMDPPQHGGQFRMLTKEFMIKRVSDMRPRI  
ESIFSRLVDELLEKGPANLVEDLFLPLTSEVIAGLLDVPACDHGFFQEQSRLKVLLLDVD  
PSIPKAASDRILSYLDRILITERAKDAEHRTDLLSRLIVEQVRPGHLTHRELVIMAELLML  
AGHETTANQMALGVFSFLTNPDLQLLLRENPTLLRSASAVEEMLRFHTIVHYNFRVATEDV  
EVAGQMIRKGEVIALISGANHDATAFDQPERFDITRKADHHVAFSYGIHQCLGQPLARV  
ELQVVFASLFERMPGLQFAVPLEDIKKGKGDHVFVQGLEALPVTW

>C2L64\_30215|KEGG|CYP105T2|[Paraburkholderia hospita]phs|BP

MQKDLVDLVQDDTEREFFPQRRGNPLNPPLEYAHLRAEQPLAKVTLWDGSTAWIATRWD  
VRAILGSPHFSVDPFRPGYPSISPARAVQARSQAFINMDDPDHARFRMLTKDFMQKRM  
SDLRPMVRKLVDELIDGMVEHGPPVDFVKHFSQPLPSMVISALLGVPIEDHATLGTWSNT  
RNDHTASPEVVQQAVRRMEAHLGQIIAQKEADPGDGSMDLSRLVIEQILPGNVTREEVVR  
IASLLYSAGHGTSSQIGLGTLSLLMNPQRAELEADPSLLSSAVEEMLRFHTIAHFNSA  
RVATGNVMIGGQQILAGEGVYPLIFAANRDPVFPNPDSFDIHRNPQEHVAFAYGIHQCL  
GQPLARLELHTVFGMLFKRLPELKLAVPVEALTFNSTSQVYRLETLPVTW

>C2L64\_49995|KEGG|CYP1049A4|[Paraburkholderia hospita]phs|BP

MAHQMTLRFEDGVTRFIECEEGERVTDAAIRARINIPLDCRDGVCCTCKAICESGEYVLG  
DCVEDALSPEEATARKVLTCQMSPRSDCVIQTATNSDVSGTGPCSHRGRIVACHRASDTT  
IAFSVELENRADLSFLPGQYVNIRVPGTDQTRSYSFSSGPSEPHLSFLVRNVRQGMSTW  
LCQTAKAGDPIEFRGPMGSFYLRPIERPVLFLAGGTGLAPFLSMLDKIVEDGGSPYPIHM  
ILGVNSDADLVGIDRLEIDAQRLPNFTYACTVASPDSAHPSKGYVTHHISASQLNGGDAD  
VYLCGPPPMVDVAVRSFSLSSGLTPRNFYYEKFAGTGLVVQTGEERIEAPVDVDEAFDLRMV  
LELGAAQLTMGRLESTEQLIIFRQLAEATAQFVSGRRFTDVPRYIEANHAHFHMFTIEASGN  
AQLIALYRQLTVQDYIARALTDQIEIVGDIVQQHRDIVAAFELGDLNAARDVIALHALHS  
RATMSRALEHMAMVKTTMPVAAPPSSLLSAPVESAPQVCPFTSRTLPPYSHELDWPEGLEP  
FKVVDGSGQDPYEHYRWMREHAPVLRCSATSDVWFLSRYDDVYQAIRNPKLFSSEVVS  
PPPLTFLTLFDAPDHSRLRKVVQPSFLPLALDPFIRQIAQRAEDLLDAMIAGGGDVVND  
FAIPLSISTISTMIDVPNEDEEKMKFWSDETFSYFGRLARNAPGTGTDEQSAQAFFAYLK  
RALERLVLTDSQSIGGHIARMWKDGLLSEKEAKELCAFVFIAGHDTTTLVANAFRMFAE



QPDLLGRIENPADADRFVEEVARYRGTVQRVSRITTEATTVAGVDLPKGAVVRLLLSAA  
NRDSRKFAEGETFDIDRDSSGHLGFGNGMHKCLGAPLAKLETLIATKALARKVGDIAFDP  
ARPIQYVRGNNLTNSGPEHMFVKLGGLSA

>C2L65\_08430|KEGG|CYP195A6|[Paraburkholderia terrae]pter|BP

MHPSNATSNADDIARQFDLRHLDASFHADPYPVYHALRTHPEVKRMPDGSLFLTRYRDVQ  
AVYRDPKTFSSDKKVEFAPKYGATPLFEHHTTSLVFNDPPLHTRVRKLIAGALTARAIAA  
MEDGLVRLVDGLLNHAAERGEIDLIGDFAAAIPVEVIGNLLDVPHDEREPLRDWSLAILG  
ALEPSLTPAQHDRGNRAVTEFVAYLKDLVARRRAAPGDPQHDLVTRLIEGEANGEQLSEV  
ELLQNCIFILNAGHETTTNLIGNGLVTLSEWTDERDALLREPALIESAVEECLRFESSNQ  
LGNRMTMVDTEIGGVPVAAGTPVTLCIGAANRDPEQFAQPDRFDIRRTPNRHLAFGFGIH  
QCAGLSLARLEARIAIGRFVRRFPSYRISGEPTRGGRVFRFRGYAAVPCTVE

>C2L65\_22700|KEGG|CYP133C2|[Paraburkholderia terrae]pter|BP

MKFTDLSSPAYFDNPYPFYEGIRSAGAFVPLAPSIMLTGRHAVIDALLPDRRMGKTYMPS  
VVARYGESAREQPVFQALERTFLMMNPPTHTRLRALLMKAFNARQIETLRTIAEETDDSL  
IDAMQGKREVDLVSEFAMPLPLQIICRLLDVPVEDGVRFGDAASLLVSAFDLAPMSADAL  
ARANQAALALEQYFRAVVAQRRATPGHDIVSSLIQAEEGGERLSEDEIISNVILLFVAGH  
ETTSNMLGNALIALHRHPAQLERLRGDPSLVSKAECARYDTAVQMVVRTAFDDIDVDG  
QTLPRGSIVFMLLGSANRDPERFDAPDTLDIGREPSGHLLTFGAGIHYCLGARLAMMELE  
IALHKLLTRLPLQLRLTNLDALQWRRRNLRGVESLIAAL

>C2L65\_33045|KEGG|CYP105T7|[Paraburkholderia terrae]pter|BP

MQHESNELIEARAERDFPFQRTGCPLRPPSEYAQLREEQPLAKVRLWDGSEAWIATRWDD  
VRAILGNPQFSVDPFREGYPSVSAARAVQARSRQAFINMDDPDHARFRMLTKDFMQKRM  
SDLRPMVRKLIDELIDKMIEHGPPLDFVTHFSQPLPSMVISALLGVYPYEDHTKLGTWSST  
RNDHTASPEVVQEAVRNMEVHLGEIIARKEENPGDGNDMLSRLVVEQIRPGHASREEVVR  
IASLLYSAGHGTTSSQIGLGTLSMLMNPSQRAELEADPSLLSGAVEEMLRFHTIAHLNSA  
RVATADVMIGDQLIRAGEGVYPLILAAANRDPEVFPEPDTFNIHRKPQEHMAFAYGIHQCL

GQPLARLELHAIFSTLFFKRLPDLRLAVPVESLTYNGTSQVYRLES LPVTW

>C2L65\_33140|KEGG|CYP105CV1|[Paraburkholderia terrae]pter|BP

MSGCPFSKPAFPMPRQCPFVPPAEYSAFQQQPGPVKVQMWDGKDAWLFTRYDDVRAVLGD  
NRFSGDPHVGGFPSLSPARNAVLDLEPAFIRMDPPQHGHHFRMLTKEFMKRVSDMRPRI  
ESIFNRLVDELLEKGPANLVEDLFLPLTSEVIAGLLDVPACDHGFFQEQSRLKVLLDVD  
PSIPKAASDRILTYLDRILITERTKDAENRTDLLSRLIVEQVRPGHLTHRELVIMAELLLM  
AGHETTANQMALGVFSFLTNPDLQLLLRETPSLLRNAVEEMLRFHTIVHYNAFRVATEDV  
EVAGQMIRKGEGVIALISGANHDATAFEKPDREFDITRKADHHVAFSYGIHQCLGQPLARV  
ELQVVFASLFERMPGLRFAVPLEDIKGKGDHVFVQGLEALPVTW

>C2L65\_33200|KEGG|CYP105T8|[Paraburkholderia terrae]pter|BP

MNKPETTLQCPFATERFPWPRDNAAPLAPPHQYATLREQAPVVQVSLWDGSLAWLVTDM  
HFREVMTS PHFSASPLTPGFPFVSPSRAAQSKSYQTFITMDPPEHGQYRRTLTKEFMAKR  
MQELRPLVQSRSLDQLLDDMANQGGPADFIAAVALPLPSLVISLMLGVYPYADHDKLQKWSG  
DRMDLSIAPEALTQSAKSMNEYIDALLREKERDPGDGGDLLSRMAIEWINPGKLSHADAV  
QMATLLYLAGEHETTANQIGLGLLSLFQHPQQRKALTEDSTLVRSERVEEMLRFHSITHMNS  
NRVATQDVVIGGQLIRKGEGLVALLHGANDHPVAFPEPERFDIRRDTKDQSHVAFSFGIH  
QCLGQPLARLELQVVFETLFFKRFPDLRLAVPEDALQYKDKSFVYGLKALPVIW

>C2L65\_33210|KEGG|CYP105T11|[Paraburkholderia terrae]pter|BP

MTDDTAGGRCPFEGRFPWPRAMQEVLPQPPRYASVRESEPIRRATTWDGNTVWVLTKMK  
DIREVLTSPHFSASPQTHGYPSVSPARAAQSRSYRTFITMDPPEHGQYRRTLTKEFMMKR  
IDELRPFVQTTFDTLLDQMIENGAPADFIRDVALPLPSIVISIMLGIPYEDHARLQLLSS  
NRMRLDISPELLAQSAQEMEYIDRLLREKEQEPGDGEDLLSRLALEWINPGKLSHEDAV  
QMSVLLYLAGEHETTANQIGLGLLSLLQDPQQAALIAEPSLARGAVEEMLRFHSITHMNS  
ARVATADVMIAGQLIRKGEGVFAPVQAANDPEAFDPERFDIRRDTKHASHVAFSFGVH  
QCLGQPLARLELQVVFETLFFKRFPDLRLAVPFEQLHFKCNGNVFGVETLPVAW

>C2L65\_38220|KEGG|CYP1049A4|[Paraburkholderia terrae]pter|BP

MAHQITLRFEDGVTRFIECEESESRVTDAAIRARINIPLDCRDGVCCTCKAICESGEYVLG  
DCVEDALSPEEASARKVLTCQMSPRSDCVIQLATNSDVSGTGPSSHSGRIVACQRASDTT  
IAFSVELENRADLSFLPGQYVNIRVPGTDQTRSYSFSSGPSEPHLSFLVRNVRQGMMSTW  
LCETAEAGDPIEFRGPMGSFYLRPIERPVLFLAGGTGLAPFLSMLDKIVEDGGSPYPIHM  
ILGVNSDADLVGIDRLDIYAQRLPNFTYACTVASPD SAYPNKGYVTHHISASQLNGGDAD  
VYLCGPPPMVDAVRSFLSSEGLTPRNFYEEKFAGTGLVVQTGEERIAPVVDVEAFDLRMV  
LELGAAQLTMGRLSSEQLIIFRQLAEATAQFVSGRRFTDVPRYIEANHAFHMFTEASGN  
AQLIALYRQLTVQDYIARALTDQIEIVGDIVQQHRDIVAAFELGDLNAARDVIALHALHS  
RATMSRALEHMAMGKTAPVVAAPPSLPSAVPESAPQVCPFTSRTLPSYSHELDWPDGLEP  
FKVVDGSGQDPYEHYRWMREHAPVLRCSATSDVWFLSRYDDVYQAIRNPKLFSSEVVS  
PPPLTFLTLFDAPDHSRLRKVVQPSFLPLALDPFIGQIAQRAEDLLDAMIAGGGDVVND  
FAIPLSISTISTMIEVPNEDEEKMKFWSDETFSYFGR LARNAPGTGTDEQSAQAFFAYLK  
QALERLALTDSPSIGGHIARMWKDGLLSEKEAKELCAFVFIAGHDTTTILVANAFRMFAE  
QPDLLGRIENPADADRFVEEVARYRGTVQRVSRITTEPTTVAGVDLPKGAVVRLLLSAA  
NRDSRK FAGGETFDIDRDSSGHLGFGNGMHKCLGAPLAKLETTLIATKVLARKVGDIAFDP  
ARPIQYVRGNNLTNSGPEHMFVKIGGLSA

>C2L65\_44715|KEGG|CYP1176B1|[Paraburkholderia terrae]pter|BP  
MGCPVHERLNDVPADRVASFNYRTGEAMVVPWTVLHDLGAGPGFFYSPELGGHWCAAKR  
ETVIDILRNWELFSCRNIRVPRVDRTVPSIPHHMDPPEHGKYRISVVELFGHRILDELTP  
AIRATARDLANGLAARNEAEFVRDFAMRMPVEIFMRMCGLPLERRDEMIGWVQSYFHGAS  
QQESNDAHGKSIAFLSGWLDEQLADPEKSGGHIMPSLLKTRVDGRPLSREEMLSILITLF  
NGGLDTVAAQMTHIMRYLAEHADQRQKLLDNPEKIPDAVEELLRRFSIISIGREVTRDAT  
YEGVALRKGDMLVCLISAAGLDEEIFPRALEVDFDRSNRRQHCAFGSGPHMCMCVGAPLARL  
ELRIMLEELLPRLPGLRVRPGASLSYHTGVTIGLVDLPLQWGESTHVS

>C2L65\_44875|KEGG|CYP1487A2|[Paraburkholderia terrae]pter|BP

MEISMNSSVQTDGGAARCPFHSAFDPLEPAQIADPFPI LAKMREESPVFYMEKYDLWVVT  
RREDVLAVYKDMVSFSNGNAHKPLSPKSQAVIDRVGEDWPLPVDGSLNAMDPPEHLPLKQ  
LFMSVFHKALPGTDEWLDEKLNKLVDRFANDGEADLVPSFFWPTTVGAVAH LIGAADSET

ERFNEWAENWFELTGSTLLSPERAEACWMAFIDFEQWAYALLEARRRDPQHDLISKLIEA  
QRSGAAVTDRQIVTNMIGMVAAGTDTTANTIAQMIYTLLKNPDQLQRVREDPKLRPQMIE  
EVIRLRLPIRGVVRTMTKDVEMGGVTLPKGAKVYIHLGSANHDPAMFANPDAFDIDRNN  
HKHVSFGAFNRACVGAFLARLEIAKALDIILDRPLGRLADENEPLRYTESIIVPSLKSL  
RVRWDVPAKAV

>CUJ91\_08245|KEGG|CYP195A3|[Paraburkholderia graminis]pgp|BP

MSTATADAATLARNFDLRHLSPEFYADPYPVYHALRAHEPVKRM PDGSLFLTRFRDVQAV  
YRDPKTFSSDKTVEFRPKYGDSPLYTHHTTSLVFNDPPRHTRVRKLIAGALTARAIAME  
PGLVQLVDGLLDAAAERGRIDLIGDFASAI PVEIIGNLLDVPHAERAPLRDWSLAILGAL  
EPSLTDAQFERGNRAVSEFVDYLRGLVARRRREP GDPQHDLVLR LIQGEAGGEQLSEEEEL  
LQNCIFILNAGHETTTNLIGNGLVTLTTEWPDQRAALLAEP SLIESAIEECLRFESSNQLG  
NRMTTVDT EIGGLPVARGTPVTLCIGAANRDPEQFAEPDRFDIRREP NRHLAFGFGI HQC  
AGLSLARLEARIAIGRFVRRFPSYQLDGEPTRGGRVVRFRGFAEVPLL CR

>CUJ91\_23590|KEGG|CYP1485A3|[Paraburkholderia graminis]pgp|BP

MTCEIPDPGSYSVLPSIIIGTGSGDPYPLYGWLRAHRPLCRDASGVWLASSHALVTRILDD  
ARFSARPPPGTEPLDDPLGYASMVFQ TGEAHERLRRFLGPLFSRKALVSLQDFIDDEVA  
RLVDQCEHLPRFDLVANIASVLPVRTICRLLGF PDAGASYLEASAGAWQLISGAPMSAA  
EHALAAMQTEAFLAQVESFMRAIDPHAAPDHAASRFLRLEQEGGIGRREMLVNILFLFIA  
GYGTTLLSIGNSVAALLREPRAWQALKDDISLVPQAVRELYRYDPAVQSVFRYAWDDVEI  
DGCRIRRGERV MPLIGSANRDP AVFAAPDEICFEREAGRSLTFGAGPHSCMGLALARMQL  
ESLLRALTRMPDLRLAPGQQARQQHGSFHGYDRLMVER

>CUJ87\_03085|KEGG|CYP1220A2|[Paraburkholderia caledonica]pcj|BP

MAIASTRTLKVREISDLPA PRGLPLIGNAHQLAPSRTHLILERWAHELGTPYRFQIGSRP  
VTVWDDTELCHSIMRERPNGYRRYSPIEENLDEMGSNGVFS AEGTAWEPQRKLV MQALSV  
AHVKAFYPTLSAITERLRVRWERAARS GRV VEMTEDLKRYTVDVTSALAFGDDPGTLEQD  
GNVIQEH LALIFPMLMNRINAPFPYWRYVKLPRDHR LDHALAEVHRYVRLTMNRARERM  
DRPHDEPGNLL EAMLRFRDTPGSRITDDEVAANVLTMLLAGEDTTAHSIAWALLYLSSDD

ALQSRVSSRARTVLGAAGVCPTYETLKTLDLCEAVCTEASRFRPVVPVHAFEPLQDVEHR  
GIHLPAGSRMFFLTRPSMLDASNFEHPEKFDPERWMHELTIQRGAHETRAHLQFGGGPRV  
CPGRHLSTVEMRLVISMLSAGFVSRLAVDTSSIREVAAFTMVPSAMPVRLCLRQ

>CUJ87\_07550|KEGG|CYP195A3|[Paraburkholderia caledonica]pcj|BP

MPTATAGDTAILARDFDLRHLSPEFYANPYPVYSALRTHPEVKRMPDGSFLFLTRFRDVQA  
VYRDPKTFSSDKTVEFKPKYGDSPLYTHHTTSLVFNDPPRHTRVRKLIAGALTARAIAM  
EPGLVRLVDGLLDAEVERGRIDLIGEFASAIPEIIGNLLDVPHAEREPLRDWSLAILGA  
LEPSLTSEQFERGNRAVTEFVDYLRDLVARRRREPQDPQHDLVLRILIQGERGEGGDGEQL  
SEEELLQNCIFILNAGHETTTNLIGNGLVTLTEWPDQRAALLEDPSLIESAVEECLRFES  
SNQLGNRMTTSDTEIGGVPVARGTPITLCIGAANRDPEQFAEPDRFDIRRAPNRHLAFGF  
GIHQCAGLSLARLEARIAIGRFVQRFPPAYRLDGEPTRGGRVRFGRGFASVPLLCR

>CUJ87\_11010|KEGG|CYP133C8|[Paraburkholderia caledonica]pcj|BP

MNFATFSSPAFFTDYPYMYEKLREAGPLLVPVGNALVTGRFEIIDALLRDRRMGKTYLQS  
VRARYGDAATEQPVFQALSRTFLMMNPPAHTKLRTLMLKAFNARQVEKQREIVEATSREL  
LDRIGSAAQFDLVSGYALPLPVEIICRLLDIPSSDGAQLGVAASRLVAAFDLAPLDEAAL  
ADANEAALTLERYFRTVIEQRRARPGDDIVSSLVHVEDEGATLSDDIIVSNIILLFIAGH  
ETTSNMIGNAMVALFRHPARLEALRREPAAIAKAVAEKMRFDSSVQMVVRTALEEVVIHD  
VTLKPGTIVFMLTGAANRDPAVFPHPDQLDFDRGSKVPSLAFGGGIHYCLGARLALLEME  
VALRDLLARFPQMOPEDLDQLNWHRRNNLRGVQSLRIHT

>CUJ87\_32005|KEGG|CYP1097A18|[Paraburkholderia caledonica]pcj|BP

MPPIDAHQPSATHTGSTLGLRRLADLPGPRALPLLGNLHQFDFRRLHQTLKWTQHGHPV  
YRVTVPRSAVLVLADPDLVGKVLRRPDFTFRPGVLA AVAAELGGMTGLFDSEGATWRNQ  
RRMMVQAFAPQPVKAYFPSLVEVARRLQRRWEDRAEGGDVIDLGADLRLYSVDIVAGLAF  
GTDVNTIEMGDHPVQRNLDMLQGVARRTMMFPFYWRYVRLPADRRRLERSVIALRDAVFD

LVAQAKERMRLDPLRAANPPNMLEAMLA AAAKGGSGVTEADVAGNVSTM LLAGEDTTSNS  
LVWLIWLLQRHPDALQRAREEVLRCVPSLDEL TIEQIRRLDFLDACTHESMRLKPAAPFI  
SVEALEDTTVGDVAIDKGTIVLC LMRDTSPDNTHFENAAQFDPRRWLLDSVNRKAAMPFG  
AGPRICPGRYLALLEIKVAMVMLLARFDIASLATAHGGE PDERLAFAMSPETLHIRLR  
LV

>CUJ90\_07885|KEGG|CYP195A3|[Paraburkholderia terricola]pts|BP  
MPPATTSDAAALARDFDLRRLSPEFYANPYPVYHALRTHEPVKRMPDGS LFLTRFRDVQA  
VYRDPKTFSSDKTVEFRPKYGDSPLYAHHTTSLVFNDPPRHTRVRKLIAGALTARAIAM  
EPGLVRLVDGLLDAAAERGRIDLIGEFASAI PVEIIGNLLDVPHAERAPLRDWSLAILGA  
LEPSLSDAQLERGNRAVSEFVDYLRGLVAQRRREPGDPLHDVLT RL IQGEEGGEQLSEAE  
LLQNCIFILNAGHETTTNLIGNGLVTLAEWPEQRAALLREPSLIESAVEECLRFESSNQL  
GNRIATLDAEIGGVPVARGTPVTLCIGAANRDPEQFAEPDRFDIRRAPNRHLAFGFGIHQ  
CAGLSLARLEARIAIGRFVQRFPAYRLHGEPTRGGRVVRFRGFAEVPVELDPAARRTP

>CUJ90\_19250|KEGG|CYP1220A16|[Paraburkholderia terricola]pts|BP

MDTVSSSRVRCRQVSDLPCPKGLPFVGNLHQLSPTRLHLVLEQWAQELGSPFRFQICRM P  
VTVWTDPELCQAIMRERPHRYRRYASIEPVLEEIGTNGLFSAEGA AWAPQRKLIMQSLSI  
PNIKAFYPGLKATTERLYRRWQSAAAHGKV VEMTDDLKRYTVDVTSALAFGEDPRTLEQD  
RGVIOEHLALIFPMLMNRINAPFPYWRYVKLPRDRQLDRSLVEVHRYVRSMM SRARERM  
DEPSESPRHLLLEAMLAMRDTPGSGVTDDQVAANVLTLLLAGEDTTANSIAWALLYIAADP  
ALQRRLFDSARGVLGSESVCPDFTSLKQLDLFEAVCTETGRLRPVA AVNSFEPLEDVCLA  
DIMLPAGTKMFFLNRPATLDEKNFSNPLQFDPDRWLHDGSRPRTAHDPRAYLQFGAGPRV  
CPGRYLA AVEMRLVLSMLMANFSIQMAVDPGTIREVTAFTMVPSAMPVRLTARTA

>CUJ90\_31030|KEGG|CYP1485A6|[Paraburkholderia terricola]pts|BP

MTVTLADPDFYSALPSIIGTGSADPYPVYAWLRANRPLCRDASGVW LASSHALVTRILED  
ARFSARMPPSATPFDDALGYTDMIVFQNGAEHDLRRFLAPLF SRKALAALQAFIDDEIA  
RLVERLRDTPRFDLVADIASVLPVRTICRLLGFDPDAH GARYLEASTGAWQLISGAPLAPA  
ERMSAITQTAEFLAQVESFIADIDPDAMPDHAASRFLHLEREGGIGRREMLVNILFLFIA

GYGTTLLSIGNGLAALLRAPRAWQALRADPALVPQAVRELYRHDAAVQAVFRYAWEDVEI  
DGQRIRRGELVVPLLGAANRDPAAFDAPDEIRFEREAGRSLTFGAGPHSCMGLALARMQL  
ESLLRSLLAHMPDLRLAPGPQVRQQHGSFHGYDRLVLERAGG

>DSC91\_002542|KEGG|CYP105B78|[Paraburkholderia caffeeinilytica]pcaf|BP

MTDEGGMMLSSHRQGENMNTIVDGATEGILDYPTPRDPAAPFLPSPELRALRDAGVEITRV  
RIWDGSTPWILLSHAAQRKIMGDPRVSANDHLPNFPMNRAIAETIHDRPKTIFDTDGED  
HARLRMLTNSFTRHRMEKIRPQIQQATDDLIDRMLAGPKPTDLVEALSLPLPSLMICDL  
LGVPYDDHDFFEKHISKIANARDKSPDENRSSTQALGEYIGKLIQQKMDHPEEDVVSDDLQ  
RVKTGDLDMAGAVQLGVILLIAGHETSANMITLGTALLLQNPDMKLLRETDDPKIVAGA  
VEELLRYLTIPHLLQRRIAIEDIEFNGTIIRAGEGICSPLSANFDPVAFDPKVDITR  
DARHHHAFGWGPHQCIGQQLARVELQVVYPTLLRRVPTLQLAVPFAELRFKHDSLAYGIE  
ELPVMW

>DSC91\_007111|KEGG|CYP195A3|[Paraburkholderia caffeeinilytica]pcaf|BP

MTPATASDASILARDFDLRQLSPAFAHADPYPVYHALRAHEPVKRMPDGSFLTRFRDVQA  
VYRDPKTFSSDKTVEFKPKYGDSPLYSHHTTSLVFNDPPRHTRVRKLIAGALTARAIAM  
EPGLIRLVDGLLDAAAARGRIDLIDAFASAI PVEIIGNLLDVPHAERAPLRDWSLAILGA  
LEPSLSAAQLERGNRAVSEFADYLRDLVARRRRDPGDPQHDVLTRLIQGELGELSGEQLS  
ETELLQNCIFILNAGHETTTNLIGNGLVTLAAWPEQRAALLREPSLIESAVEECLRFESS  
NQLGNRMATVDTQIGGVAMARGTPVTL CIGAANRDPEQFAEPDRFDIRDPNRHLAFGFG  
IHQCAGLSLARLEARIAIGRFVQRFPAYRLDGEPTRGGRVFRFRGFAEVPVEVEPAHSGSA  
SQ

>FNZ07\_03695|KEGG|CYP133C9|[Paraburkholderia megapolitana]pmeg|BP

MNFASFSSPAFFTDYPYPIYEKVVREAGPLLVPAPNVLVLTGRFEIIDALLRDRRMGKTYLQS  
VSVRYGEAATQYPVFQALSRTFLMMNPPSHTRLRLTLLMKAFNAKQIEKLREIVEMTSDDL  
LARIGSKAEFDLVAEYALPLPVEIICRLLGISPADGLKLGAASRLIAAFDLAPLDEARL  
AEANEAAALTLEWYFRQVVEQRRASPGDDIISLVSVEDDGATLSDEEIIISNVILLFIAGH

ETTSNMIGNAFIALFRQPVQLLALKRDPALIPKAITECMRYDSSVQMVVRTALEDVAIGD  
ATLARGTIVFMLVGAANRDPVFAHPDQLDFSREGNVPSLAFGGGIHYCLGARLAQLEIE  
VAIGALLSRFPDMQPTNLDQLIWHPRNNLRGVESLRVVTAAA

>FNZ07\_08320|KEGG|CYP116B207|[Paraburkholderia megapolitana]pmeg|BP

MSDAINPNRTASCPFHDNTGSPPSTSDGCPINHRAADFDPFEDAYQQDPPEYVRWAREQQ  
PVFYSPKLGWVWVTRFDDIKAIFRDNMTFSPSIALEKITPTGPEANEVLASYGYAMSRTL  
VNEDEPAHMPRRRALMEPFTPEALERHKKPMVRRLLVRQYVDRFINDGKADLVDQILWEVPL  
TVALHFLGVPEEDMDTLRKYSIAHTVNTWGRPKPEEQVEVAQAVGKFWRFAGNVLEKMRS  
NPNHGHGWMQYGIRKQKELPEVVTDSYLHSMMAAGIVAAHETTANATANALKLLLQHPQAW  
RDICDDPRLIPNAVEECLRHNGSIAAWRRLATRDVTISGVEIPAGSKLLIVTSSANRDER  
QFAGADLFDIRRENASDHLTFGYGSHQCMGKNLARMEMQIFLEAFTRRLPHMRLAEQRFS  
YVPNTSFRGPEHLLIEWDPALNPERNDLSVLRPRTAVRIGEPSAHAISRPVVVTSVIYAG  
ADIVRVKLASRDGRPLPRWTPGSHIDVECGDTGISRQYSLCGNPAAETFEI AVLKEHDS  
RGGSVWLHDAVKPGALLHIRGPRNHFRLETAQRVVLIAGGIGITPISAMARRAKELGID  
YEVHFSGRTRASMVLLDELSALHGDRLRVYVSDDEDTRNDFSALRVDDATQVYACGPANML  
DALEQIATNWPDNLTCLKIEHFVSSIGTRDPDREHAFDVELKDSGLVVTVAADQTLLAALRQ  
ANVDVQSDCEEGLCGSCEVRVLAGEVDHRDVVLTKTERQSNTRMMACCSRAQGTRLTLEL

>FNZ07\_10045|KEGG|CYP133C13|[Paraburkholderia megapolitana]pmeg|BP

MNYTDLASPDFYRDPYPVYQLLRQAGNLVPIAPRTLITGHADIARTVLADRKMKGKSYLEA  
VRTRYGEAGVSQPAFQALSKMLLMNPPAHTRLRALLMKAFNSRQIDLLRDISQSTADEL  
IDALEANRPIDLVSEFAAPMPIRIICKIMDVPLDHAPTLGANVGRLAQTLEAAPLSPEQI  
AAANTALENLEHYFKDIIATRRSHPGTDLISTMLSINDNGETFSENEIIWNVIFIFAAGH  
ETTSNMIGNALIALHKHPDQLEKLRARPELLTQAINECMRYDSSVQIVQRVALEDTDIHG  
VAVPKGTVLLSLGATNRDPMQFDQPDTLTLLIERPESANAPLVFSGGIHYCLGARLAMFEL  
ETALGTILRRLPDLRLTNLDALQWHQRNTLRGVTSLLGHIDQRPLAA

>FNZ07\_25550|KEGG|CYP1043A12|[Paraburkholderia megapolitana]pmeg|BP



MAAALGIVLGFVAFASIPWWLPQRVLALRARIFVRINGEEGIAVPGPTVSAAQFMQVYSH  
PAANGRSKGAGLSDLFWYWLSPGPEIHQEHLEAGARYDEVARATRQFLALPKVNAEELAA  
RCAERAYADLSGKNMVLVRLRNLMSVWADFYQQLVFGEPCPTPTARKLIVDNADDVV TAL  
KCCGLRHMKKRERLTAFLIEKIKAGKLTNPLPDGLSIDEQALYLQGVFFNTAIVQMSEAM  
THLILAI AQHQEVQQALVDNDHDNHYLDQVIAETLRAFPLFGIAHRIATADI AVDDHTTI  
SQGSVLCFNYSYQRTGFDPPERFDPTRWNGLSKRDATYIPFGVTANRPCPAQAVAMVTM  
RAAGRELLKRFACYSSASHTRSIPHRGPCLLVARGGAEHPRVRSGLAFMALRDRWEDVW  
RSLQLVLGTWVMVWHARRRLCQRHFEEAARCPVHADTR

>FNZ07\_26685|KEGG|CYP1686A1|[Paraburkholderia megapolitana]pmeg|BP

MPQRRRASPAATATDCMHGDP AHLARDVNGNSCRGGPMSAKPIQTVKGWPVLGSIMHYKR  
DALSLFLNAARDLGDVSAIMMGPTRVVLVNSPQHVAEILQDRTD AFGRSPSYRELELLLG  
AGMLTTEGAQWKAQRAQAQPAFQKKQLTSMIPTIREKIDQVVG EWMPAGQTGLRRRDLFA  
DMLDMSMRITLRTLFGQVHEL AHRKMITALEDGSRYVIQRLEGIVNLPPHWPTPSAKEFW  
KNRAVL DAVLDIIRQYQRG TQPPNLLGMVLEGDGPQDEENIKNQLLTLFITSYETVATG  
MTWVFHFLSQHPRWYQAVVEELERYDELGYDDIFSLTTTNAVIHESLRLMPPIWSFSRTA  
KRDVTIDGYPIAAGTMVVVSPYCLQRHPSHWDDPDTFNPARWTAGSSTSKRVSAFLPFGT  
GPRICVGMNYAMMLLPLILKGACRRGTFSLDS AHPVRIKAGVTIRPVGGLMGHWTSHERL  
LEQKGIAT

>G5S35\_09305|KEGG|CYP116B212|[Paraburkholderia tropica]ptro|BP  
MSETPSQTSGRCPFPHAAQAVPNTQDAARCPMHANHAVSTHAAAFDPFSDGYQQDPPEYV  
RWAREQEPVFYSPQLGYWVTRYDDIKAI FRDNLTFSPSIALEKITPTGPEANAVLASYG  
YAMNRTL VNEDEPAHMPRRRALMEPFTPEHLKHHEPMVRRLTREYVDRFIDSGRADLVDQ  
MLWEVPLTVALHFLGVPEEDMDLLRQYSIAHTVNTWGRPRPEEQVAVAHAVGNFWQFAGK  
VLDKMRQQPDGPGWMQY GIRKQQEQPDVVTDSYLHSM MMAGIVAAHETTANATANAMKLL  
LQHPRAWREICEDPSLIPNAVEECLRHNGSVAAWRRLVTKDVRIGGIEIAAGAKLLIVTS  
SANHDERHFADADLFDIRRDNASDHVTFGYGSHQCMGKNLARMEMQIFLEEFTRRLPHMR  
LAEQQFSYVPNTSFRGPEHVWVEWDPKQNP ERANRALLDAEVPVRIGEPSAHALSRPVVV  
ERVERVAQDIVRLRLVAPDGGVLPRWAPGAHIDVECGESGVS RQYSLCGDPADTHAFEIA  
VLRETESRGGSVVHDTLREGMRLKIRGPRNHFR LDEEGRAIFIAGGIGITPVSAMARR  
ARELGIDYELHYSGRARANMALIDELTQLHGERLCVHVSEEGTRNDFGALRVDALTRVYA

CGPARMLEALEAASAAPEDALRVEHFASVGLKDPADDEHAFVELKDGLVLPVAADQT  
VLDALRRANIDVQSDCEEGLCGSCEVRVLAGEIDHRDVVLTRAERDTQTRMMACCSRAKG  
QRIVLEL

>G5S35\_20475|KEGG|CYP1220A14|[Paraburkholderia tropicalis]ptro|BP

MSTASTGSATALRQVADLPCPRGLPLIGNLLQLEPTRLHQILERWAEELGTPYRFQVSSI  
PITIWTDTELIQSIMRERPHRYRRYSPIESVFDENGANGLFSSEGVQWESHRLVMQALS  
IPNIKAFYPTLAEITQRLRTRWLRAAERGETVEMTDDLKRYTVDVTSALAFGEDPRTLQDQ  
DHGVIQEHLELILPAVMGRINALFPYWRVFKLPADRKLDSLAEVHRYIDSMMARARTRM  
RDEPSELPRNLLEAMLVQQQHDGEPISDAQIRANVLTLLLAGEDTTADSIAWTLPYLAAD  
AALQTHLGEEAHRVLGDAPVCPDYATLKDLDIFEAIATRLRPVAAVHSFEPLEDVVV  
DNVALPKGTRMFFVARPAMIDEKNFVDPQRYDPWRWMRKGEHDAPREGAHGAHDVRAYLQ  
FGAGPRVCPGRHLATVEMRLALSMLNEFEIELAIDPEQIKEVSAFTMVPDTPVKLRKR  
VR

>G5S35\_27570|KEGG|CYP133C11|[Paraburkholderia tropicalis]ptro|BP  
MQFSDFTSPAFFANPYPAYEKIRAAGALLPIAPQVFVTGRFDVIDALLRDPKMGKTYLQS  
VAARYGEAATARPVFQSLNRTLLMMNPPTHTRLRALLMKTFNARQMEKLRDTVEATTRL  
LDAIGTNAGFDLMSDFALPLPVRIICQLLDVPLEDAHALAGAAGRLVAAFPLAPLDAQAL  
SAADEAALTLELYFQNVIEQRRSQHADDLISALLHVEVDGAKLTDEEVVSNVLLFIAGH  
ETTSNMIGNTMLALFRHRDRYQALQDDRTLLPRAIAECLRYDGAVQMVVRTAFDDIDVGD  
SKLARGSVFMLIGAANRDPQAFTHPDQLDFARDDTAKSLSFGAGIHYCLGARLAMLEME  
VAIGHLLDRFPALQAENLDALVWQHRNNLRGVLTALPVRTGI

>G5S35\_28475|KEGG|CYP1112A12|[Paraburkholderia tropicalis]ptro|BP

MRSWPVTPRSSGIDLWAADVLDVDPYPTYRALRELGDVVYLTHSNLYALTGYDVIKDALAD  
PARFSSAQGVGFNDGVNQALQGTSLASDPPTHQLRAALSENLTALRGLGEQIKANAQ  
ALVARLVKQPSFDAIDEIARRFPIGVVADLVGFQGEARANMLRWQAAMEVIGPMNQRTV  
ENFPIAGELYGYCSQITQDALTPGSVGWGVFEAENNGMIPAGAARHIIHQYLGAGLDTTL  
AAIGNTVALLFGRFPEAFKVRADLSLVPSAFNEVLRYYSPVHVWSRVTAQDVEVGGATIP  
GGSRIAVMLGAGNRDPRHYANPDIFDVTRNPIDHLSFGYGPHGCAGQGLARMEGAAIEA

LATQIKSFRIGEVARAPSNVTVSFDTVPVIGLEVA

>I6I06\_04640|KEGG|CYP195A3|[Paraburkholderia ginsengisoli]pgis|BP  
MTPATASDASILARDFDLRHLSPAFYADPYPVYHALRAHEPIRRMPDGSFLFLTRFRDVQA  
VYRDPKTFSSDKTVEFKPKYGDSPLYAHHTTSLVFNDPPRHTRVRKLIAGALTARAIAM  
EPGLVRLVDGLLDAAAERGRIDLIGEFASAI PVEIIGNLLDVPHDEREPLRDWSLAILGA  
LEPSLSDAQ LARGNRVSEFVDYLRDLVARRRREP GDPQHDLVTRLIQGEAGGEQLSEPE  
LLQNCIFILNAGHETTTNLIGNGLVTLTEWPEQRAALLREPSLIEPAIEECLRYESSNQL  
GNRMATVDTEIGGVAVARGTPVTL CIG AANRDPEQFAEPDRFDIRREP NRHLAFGFGIHQ  
CAGLSLARLEARIAIGRFVQRFPTYRLAGEPTRGGRVVRFRGFASVPVEVAV

>I6I06\_29345|KEGG|CYP1013A6|[Paraburkholderia ginsengisoli]pgis|BP

MNTKQRAPGPRGSLVMGNLEEYKRDPITMLLKLQQQYGDIARNRLGPFLTHALAHDPDHVQ  
YVLQENHRNYVRGRFYESFKLFFGDGLLT TDGDFWRRHRRVQPLFHKKQVEEHIAAVGD  
AALALVRRWQALPSGEPVEVVEEMHLSLSMLGLMVFN TDISQHAQQVGPSVRF GIAAMM  
PQGNMNDFI PRWMP TPFNRRIAQARRNLDV IIGKIVEDHRAGHCEASDVISLLLNSRHPE  
TGTPMSEQEVHDEVMTVFLAGHETT GSGMAWALYALAQYPAVLRRRLRDELDARLGGRAPT  
LEDLEALPYLTQVVDEVLRVYPP I WGFTRDLAEDDEIGGFH I PAGSSVFMSPYVTHRHPA  
FWNNPEAFDPENFASNAPNRHRFGYFPFGGMRKCIGFQTALLQMRVLTAVVAQHFDLNA  
LPGHPIERGALISLRPLQGIRLIVKPRQRQSPTQRPDPGMGAASPTSDAACGAKPQREVT  
SGCPFAEAPALPSSGPLSDEVVVVKPANPEPR SAPVLPPAATGMVPALRFTWFPSEIEAL  
PSTPSPALGGKRVVIVNGRAGTAERVAVALLRACAKATVFAPGVDADPVEAAKALVKQSG  
PFDGIVDLGLEESFSLAAANQWEMPMRHSIAMLQACYGDWEVEESASRLFYMAVTWMDGS  
MGYGDVAQQLPGLWSGLAKTLPQEV PNCNVRVLDVAPNEAGRVDQLVVRELYRWGLFEV  
GYRAGRRYTLKARRSELPALPAGSAPDLGPGDVVLFSGGARGIGLLCAKAMAGRYGCTVI  
ITGREPLPDGSEPWMTLDDAGFSRYGQEQLRLATRERTPKRIREELARLQRRRELKASLD  
EIASCGLPVQYRVC DVTDAAAVRALCGELRDVLRVVVHNAGVDRPVRLPQKSADSFIDTV  
RTKVGGGFANLCAAVADC PRLVQFCNVGSLTGRWGGMTGETDYAAANEALARLGLWAQRHA  
LPCSVKTLVWPTWDSVGMITNFAVTKRYVT PMAADEGVRHWLREFASRDSGEVMFMGAVG  
PALTPVQLKGFSPILELPNIADLVTRHHHAGEPLRFRPFRSFATRYRIDPIEVPFAQAFR

FGGRHALPASMLIEHACSVGAWVMPATVEPQRDLALINVAVHLHALPFEGEPEAGIDVLS  
EAKGYLLGDLWHVDVHCAHAATQVGLLSLTLVYRAGAAPSVRRTWPAEGLMAKEALPSS  
TAAAWNAHVLPAADWQVPLDRSKGIGRIGCAVPADASDLWAI PFPPDLRLPANHLENILR  
AVIADNTDSGEALPHEWRIDRMALSGLPPSSADAVVQYTDGRFDVVDALGQVLLELQGV  
LETVSSVPAAPPATEALAVSPLG

>FAZ97\_08880|KEGG|CYP116B210|[Paraburkholderia acidiphila]pacp|BP

MSETPSQSTGRCPFPFAAGEARDAAPRCPVSANAAAFDPFSDGYQQDPPEYVRWAREQEP  
VFYSPQLGYWVTRYADIKAI FRDNLTFSPSIALEKITPTGPEANAVLASYGAMNRTL  
NEDEPAHMPRRRLMEPFTPEHLKHHEPMVRRLTREYVDRFIDAGRADLVDEMLWEVPLT  
VALHFLGVPEEDMDLLRKYSIAHTVNTWGRPRPEEQVEVAHAVGNFWQFAGKVLDMRQN  
PDGPGWMQYGIRKQQEHPEVVTDSYLHSMMAAGIVAAHETTANATANAMKLLQHPNAWR  
EICEDPSLIPNAVEECLRHNGSVAAWRRLATKDVQIGGIDIPAGSKLLIVTSSANHDERH  
FADADLFDIRRDNASDHVTFGYGSHQCMGKNLARMEMQIFLEEFTRRLPHMRLAEQTFTY  
VPNTSFRGPEHVFVEWDPAQNPERANAALLGAHVPVRIGEPSAHALSRPVVVERVDAVAE  
GVVRLRLVAPDGGALPRWAPGAHIDVECGDTGISRQYSLCSDPADTRA FEI AVLRETQSR  
GGSAMMHDTLRTGMRLKIRGPRNHFRLEDEGRRAIFIAGGIGITPV SAMARRARELGIDY  
ELHYSGRSRKTMALADELAQLHGERLHLHVSEEGTRNDFAAALRVDDHTRVYACGPARMLE  
ALEACSEAWPEDALRVEHFAATGGKLDPSQEQA FEVELKDSGLVLNVGADQTVLDALRRA  
NIDVQSDCEEGLCGSCEVRVLAGEIDHRDVVLTRAERDTQTRMMTCCSRAKSGRLVLEL

>FAZ97\_18265|KEGG|CYP2742A1|[Paraburkholderia acidiphila]pacp|BP

MTINRTANQPDPRFRSWPPPEETMRCPFAYFHEARVTSPVIRLAEPAPGVPVYLVTGH  
RACVQVLTQPLL FASDLAGVLP GFDKSNVPPFPDRPTFHDRQVVFFARGEDHKIKRGWA  
MELVRRSRLERLRPLIVEEADRLIDAFTDAGHCDFQE QFSHPLPLRVLLHALDLPETALP  
VIRMSIAIATTDVDPNLGEEERVAKANAFGELFTMIRGLLEERHIHPGSDYISELVKAQ  
VARDGELDVNTLSIHLQGV MFGGDHAVGAHLCHLAAALAGDP ELQARLRAEPGLIPRFVL  
ETFRLEAPIPWLFRVCTADTELEGVSIEAGAVVIAATSAANRDPERFPDPGHL SLERDNV  
GREHLSLGRGAHRCIGEPLAYLVAEATVTRLLERLDAIRIDPARSDLRARASLQFRCPER

VHLLFEKR

>FAZ97\_23870|KEGG|CYP1220A5|[Paraburkholderia acidiphila]pacp|BP

MSTASTGQPLRQIADLPCPRGLPLLGNLLQLSPPRLLHILEQWAAELGAPYRFQVGGIPI  
TIWTDTELIQQIMRERPHRFRRYQPIEAVFEEMGFNGLFSAEGVAWEPQQRKLVMQALSIP  
NIKAFYPTLAEITQRLHTRWQRAAERGETVEMTDDLKRTVDVTSALAFGEDPRTLERDH  
GVIQEHLEIRILPGVMRRTNALFPYWRYVKLPSPDRKLESLAEVHRYVNAMMARARERM  
EPSETPRNLLLEAMLAQQQAPGGAASISDAQIRANVLTLLIAGEDTTADSIAWTLPYLATD  
TTLQQHLGDEASRVLGHSSTVCPDYATLKDLDFEAICTEATRLRPVASVHSFEPLEDVVV  
DNVALPKGTRMFFVARPAMLDKFNADPQRYDPWRWMMKRAEREADDGKAHDVRAYLQFGA  
GPRVCPGRHLATVEMRLALSMLMKSFTIELAIDPAKIQEVQAFTMVPDTPMPVRLKPREGA  
VLA

>FAZ97\_31575|KEGG|CYP133C10|[Paraburkholderia acidiphila]pacp|BP

MQFSDFASPAFFANPYPLYEKIRAAGPILPVGPKAFTVTRFAIVDALLRDPRMGKTYLQS  
VAARYGDEAPARPVFQSLSRLLMMNPPAHTRLRALLMKTFFNARSIEKLTSIVEATTHEL  
LERAASRAEFDLVSDYALPLPVQIICRLLDVSVADATTLGDAASQLVAAFDLAPLDEDGL  
RAADEAALSLECYFHGVVEQRRAPGDDLISAMLSVEDEGSRLTDEEVVSNVLLFIAGH  
ETTSNMIGNMMIALFRHPQQMEALKHEPKLLPRAIAECMRYDGAVQMLVRTALEDITLGD  
ATLARGSVVFMLIGSANRDPAAFPAPDTLDFARSTGTPAVAFGAGIHYCLGARLAALELD  
VAMRALLARFPEIRPVDLDALVWHRRNNLRGVTSLRVRMR

>FAZ97\_32485|KEGG|CYP1220A17|[Paraburkholderia acidiphila]pacp|BP

MDAAASSAQRLRQVRDLPCPRGLPLIGNLHQLNAPRLHRVLEHWAQELGTPYRFQICGMP  
VTVWSDAELSQSVMRERPHRYRRYASLEPVLAIEIGCNGVFSAEGAAWQPQRRLVMQALSI  
PHIRGFYPTLQAITARLHWRWQRAAERGDDVEMTDDLKRYTVDVTSALAFGEDPRTLEQE  
RGVIQEHQAQIFPTLMHRVNAPFPYWRYVRLPRDRRTDRALAEVHRTIRGMMARSRRMR

DAPSSIVRAPRHLLEAMLALRDAPGSAPGSEVTDDIIAANVLTLLLAGEDTTANALAWSL  
FYLAADEPLQQRLANEARAVLGEHDCPDYGLVKDLDLFEAVCSETLRFRPVAAIMAFEP  
VENVEVGGVALPAGSKMFFLTRPPMLDSRHYAQPERFDPDRWLRGHADADARVHDPRAWV  
QFGAGPRVCPGRHLAAMEMRLVLSTLMNRFKVRLAVDPATIEEITAFAMVPNRMPVRLEC  
RPTVQ

>FAZ98\_08660|KEGG|CYP116B299|[Paraburkholderia acidisoli]pacs|BP

MSQTPSQSGQNAAGLGAAGSGAAGPGALSRCPPHGAATAAVTPAAAGCPVSANAAAFDP  
FSDGYQQDPPEYVRWAREQEPVFYSPQLGYWVVTRYDDIKAI FRDNLTFSPSIALEKITP  
TGPEANAVLASYG FALNRTL VNEDEPAHMPRRRALMEPFTPEHLKHHEPMVRKLTREYVD  
RFIDDGRADLVDQMLWEVPLTVALHFLGVPEEDMDLLRKYSIAHTVNTWGRPRPEEQVAV  
AHAVGNFWQFAGKVLDKMRQNPDGPGWMQYGIRKQKDHPDVVTD SYLHSM MMAGIVAAHE  
TTANATANAMKLLLQHPHAWREICEDPSLIPNAVEECLRHNGSVAAWRRLATKDVQIGGI  
DIPAGSKLLIVTSSANHDERHFADADLFDIRDNASDHVTFGYGSHQCMGKNLARMEMQI  
FLEEFTRRLPHMRLAEQTFSYVPNTSFRGPEHVLVEWDP AQNPERVNAAVRDAQVPVRIG  
EPSAHALSRPVVVERVEVPADGIVHLRLVAPDGATLPRWAPGAHIDVECGDTGLSRQYSL  
CGDPADTRA FEI AVLREAQSRGGS AWVHDTLRVGARLKIRGPRNHFR LDEEGRAIF IAG  
GIGITPV SAMARRARELGIDYELHYSGRSRATMAFVDEL TQLHGERFHLHVSDEGSRNDF  
AALNVDDATRVYACGPACMLEALES CSANWPDDALRVEHF AVTRGTLDPAHERAFEVELK  
DSGLVLNVAADQTVLDALRRANIDVQSDCEEGLCGSCEVRVLAGEIDHRDVVLTRAERDT  
QTRMMTCCSRAKCGRLVLEL

>FAZ98\_19255|KEGG|CYP1220A15|[Paraburkholderia acidisoli]pacs|BP

MSTASPARATRQVADLPCPRGLPVIGNLLQLAPPRLHQILEQWAAELGTPYRFQIGNIPI  
TIWTDTELIQQIMRERPHRYRRYQPV EAVFDEM GFNGLFSAEGA AWE PQRKLV MQALSIP  
NIKAFYPTLAEITQRLHARWLRAAQ RGEIVEMTEDLKRFTVDVTSALAFGEDPRTL ERDH  
GVIQEHLERILPGVMGRINALFPYWRYVKLPRDRALDRSLEEVHRYVRAMLERARERLRD  
DPPETPPDAPAMP RNLL EAMLMQQAAGAPVTD AQICANALTLLLAGEDTTADSI AWTLPY  
LAADAGLQRHLGEQAQ RVLGAATVCPDYATLKD LDMFEAICIEATRLRPVASVHSFEPLE  
DVVLDGVALPKGTRMFFVARPAMLD AKHFADPLRYDPWRWMKREAGTGAE EKAHDV RAYL  
QFGAGARVCPGRHLATVEMRLALSMLMKSFSVELAIDEAQIREVQAFTMVPERMPVRLRL

RDNTPAAPL

>KZJ38\_02460|KEGG|CYP201E1|[Paraburkholderia edwini]pew|BP

MQAPSPNTLPSPADIDARRAPLFTPPMPPELPARRVSATGFVHAMRNDGLRLWTRDAYEAD  
YVEERLFHQKRVLVNKPDMIHRLVVENAANYPRTDYAVRLIRPIGRYSVLLATGEQWKHQ  
RRTIAPTLAPKMLPVLARHVAACTEDEVHALAALDGAQVDDLPMRLLALKIAARSMFSL  
EIREFGPEVRAAVQEFMQRHTRASLAEVLVPYWVPTPRDIPRNGFRRRWHALVERIIDAR  
ERQPAADGPRDLFDALMAARDPETGAAFSRVELADQVGTMIIVAGHEPTGLTLLWALYLLA  
NTPAAQAALADEVRDVLSPERAGDALKALPYTRAVIDETLRLYPPAWVILRHCVEPDAL  
EGLAVTRGTQMMISPWVLHHHRGFWQNPDAFDPTFLRGAPAPERFTYLPFGTGPRVCIG  
AQFTLAETTLALARLVQAQFDAQLASDEPVRPIGRATTIPDRPLWFRLLKPRHARR

>KZJ38\_17180|KEGG|CYP133B8|[Paraburkholderia edwini]pew|BP

MNLADFATPSFLANPYPVYDALREEGPLVPVGPQNQFVSGHYDIVDKLLHDRRMIHNFESS  
VRKRYGEEGAQQPVLLGYSRMFLMNPPVHTRLRGLMMKAFNARQVESMRDIARTSADRL  
IDSFESDGSVDIMAAYAMPFPIEIIICRMLDVPVEHAQKLADAIQHVAKMLDMTPVDDAQL  
AVSNDAYRTLDTYFSEVIEARRRQPGTDLISMLLKVEEQGETLTHDEIVANVVLLYLGGH  
ETTSHMIGNALISLQRHPQQFDALRKDRAKLPNAIMECLRYEGSAQLSGRTASEDMDIAG  
VPVARNISIVYLSLGAANRDPKFDHPDQLDIGRDLPRVLTFGGGVHHCLGYRLALLELET  
ALGALLTRLPLKLTVDGLDNLHWNGRSSLRGVETLRVHW

>KZJ38\_22295|KEGG|CYP133B9|[Paraburkholderia edwini]pew|BP

MKLADFATPEFFADPYPLYERLRNEGPLLTVGPKKMITGRYGVIEELFLNRQIGRNYLPS  
VRARYGEEGLRQPALLGFSRMLSQNLNPPAHTHLRGLTIKAFNARQIGPLRDTAQAMAHRL  
IDSFAPRSHGTVDLIAAYAQQPLPIAIIISGMMDVPFEHSSHSFSAALKQMFRLLEPMLDSE

ELAKTNDAYLLLARYFGEVVDARRKRPGTDLVSL LISAEENGETLTHDEIVANVIMLYLG  
GHETTANMIGNTLIALQRHPQQFDALKSDPAKL PNAILECLRYDGSVQLTARMARADTEI  
NGIRIPRDTHVFMALGAANRDPDKFYKPDQLDIERESPRPLTFGAGIHHCLGYRLALLEL  
EVALGVLLSRLPSLALTGLEDLRWLPTS AIRGVEQLIVRW

>KZJ38\_26430|KEGG|CYP1220A18|[Paraburkholderia edwini]pew|BP

MSTTASGNTNRTDGTRLRQLTDLPSPKGLPIIGNMHQVSLRTFHLNLERWGRELGTPYMF  
RMPGQQIVVLGDTDHVQGISRERPHRYRRFKPVETVLA EFGANGLFSAEGVAWEPQRRLV  
MQALSIPHIRAVYPTLAEITGRLYTRWMRAAQEQRTVDMVEEMKRYSDVTSALAFGEDP  
RTLERDTNVIQEHKLKLVMPALMSRTSAPFPYWHYIKLPRDRRLDRALIEIHRYVRRMMER  
ARERMHDEPSDMPRNLLEAMLAMRDTPD SGITDDQVSANVLTMLLAGEDTTANSLAWSTM  
FIATDAPLQARLAKDARAVLGTEPVCTDYARL KELDVFEAVCTETGRFKPVAALSSFEPL  
EDVTMGDVLVPAGTFMFFLNRPAMHN PANFVNPERFDPDRWLHARDPARGAHEQRAYLQF  
GAGPRVCPGRHLAGVEMRAALSMLAANFEAKLAVDASEIEEINDFIMKPSKMPINLTIRP  
QAA

>KZJ38\_27455|KEGG|CYP1220A19|[Paraburkholderia edwini]pew|BP

MPILGNLFQMAPAKLHLTLEQWAKQFGSPYRVQLGTIPVTVWTQADLFQTVMRERPHLYR  
RFAPMESVMAELGGNGLFSAEGA AWEPQRRLVMRALSFSNIKGFFPALEAITGRFLVRLQ  
QAEKEQRTLEMTKELKRYTVDVSTLAFGEDPHTLEREQGIIQEQLALVTPALMRRITAI  
FPYWHYVTLAEDRRLARAMVEVHSYIRKMIERARERMREAPDAPPRNLLEAMLAARNEPD  
SKVTDEQISANVLTLLVAGEDTTANAI AWALMYVAADTRLQNRLFEQARMAFGESAICPD  
YDALKHLDLCEAVCNEALRLRPVAAIQTFEPLTDVYIGGVAIPARTRMLFLTRPATRDPL  
NFAHPETFDPRWKHPRDPSEGACHELKAYLTFGAGPRVCPGRYLA AVEMRLVISMLTRHF  
EIELAIDPAKIEEVSAFTMVPNTMPVRLRPRG

>KZJ38\_30935|KEGG|CYP133B6|[Paraburkholderia edwini]pew|BP



MKLADLTTPEFLDNYPYPFYEKLRAEGPLVRIGPKAVITGRYDVIEAILHDRRFGKNYPES  
IRMRYGDDAMHMRFLFQGFSRMFLVMNPPSHTRQRALIVKAFDARHVDAMKDVSHRIAHEL  
IGAFEKAGTANLMAQFAFPLPLRMIGQMLDIPAEDTTQLGEAVSAIAKVIDVAPMNADDL  
GRACAGYEDLEHYFHCVVEARRRRPGNDLISMLLAVEEEGETLSQDDIVSNTILLLLAGH  
ETTSNMIGNALIALHRHPEQLALLKREPSLMPAAVLECMRYDGSAQTTIRSALEDVEIAG  
VDVPCGTSVLLMFGSANRDPAQYADPDLLDIERNEARLQSFSGSIHHCLGYRMALVQLET  
ALGALLERLPGLELTGLDNLNWNRRGNLRGVTSLVARW

>KZJ38\_31880|KEGG|CYP133B7|[Paraburkholderia edwinii]pew|BP

MEFADFKTASFFDNYPYPVYASLRAEGPIVSIAPNMMMTGHYDIVDALLHDRRIGKAYLES  
VRARYGEAAAEQPVFQNVSRMTMFSINPPAHTSLRSLMMKAFNARQIESIREIARATANEL  
IDAIAKTDGADLMASYASPLPIRIICRMLDVPVEDAGALANATSEMVRVLDVAPIPLDEL  
AGPNEACATLERYFADVIEARRSKPGDDLISLLLRIEDSGVKMTEEDIIANVILLFNAGH  
ETTSNMLGNSLVALHRHPEQLHALRQHDPRTAQAVFECARYDTSVQSTVRTALEDVEIGG  
TTIPRGTIIMTMLGSANRDPAKFSDPDRLDISRDDARLISFGAGIHHCLGYRLALLQLET  
AMKVLLERLPRHLTNLDSLQWRRHGNLRGVKALAAHW

>KZJ38\_32695|KEGG|CYP133C14|[Paraburkholderia edwinii]pew|BP

MNAPAFQSPAFFDDPYQYYEVLREQGPLVALTPDGKRFATARYGIVTALLDDRMRGRRYM  
PGVVRRYGEERASQPTFQALSRMFITMDPPEHTPLRALLMQAFNARQVERLREVTRATAE  
RLIGALAHDKPFDLVSGYALPLPVQVIAGVLGLPFEEAAAIGLKMERFARAFESIAMD  
TLAAANAATLELEHYFYGVLEARRTQPGNDLISMLISVEAEGRRLTNDEIVSNVLLFFA  
GHETTSNMIGNAVVSLHRHPEQLKKLREQPQLLPKAIIECMRYESSVQTALRTTLEDGVE  
IEGIALPRGSIVTLMLGGANRDPAQFHDPNQLILDRITENDRRILSFGGGLHYCLGARLAQ  
LELHIALETLLTRLPDLRVNLHELHWRHNTLRGVEALWCEHPAKAATAAARAVV

>KZJ38\_34845|KEGG|CYP133J1|[Paraburkholderia edwinii]pew|BP

MQFSDFSNAAFFTNPYPLYDEMRAAGPLVKLSPLGYVTGQYSVVHDLLEFDRRFGKGIEAS

VKARYGENAVEQPIFRMARHMLAGLNPPVHTRVRALLMKSFRTARQLERFRQASHDISHRL  
ADALIASDEPDVIRDFAFPLPMQIICTIMNIPLDAPMIKQLTDNASSVLDVNLMSPEQL  
QKANDSVLELHRYFTVLFEARRRNP GDDLISQMVA AEENGDMVTNEELFANVLLL FVAGH  
ETTTNII GNSLVSLHRHPEQLILARSNPAML PNVIMECMRHETSVQSTMRVALEDAEVEG  
VQIARGDVVFVWLGS AHRDPGMFVEPDRLKIDRSFKDVKILSF GGGGLHFCLGARLASMEI  
EAALGTLFSRLPDMRITNLDDLHWHKRSQLRGVESLQIAPS

>RBRH\_02574|KEGG|CYP1464A3|[Mycetohabitans rhizoxinica]brh|BP

MNHHKQDTIALAQADAGMEAQPSQVAVNDLKIERN DQPANVARPVAKNLKMKDGFVMPGK  
IPLLGHVHKISQNALSELRQAEAVCGPMFWTYFGTKLPVLQIMDEDGLAILQNKYTDNSY  
LREQMPVITGEAMNAFDGQRHRNARRASMDAFTP KGLTRARVGQFVVETIEQRLKRWTSE  
RKLAI F PETKDIALEVVFRI MG IETHELEQWRHQYEEFFLGMIPLKINLP GFPAWRCRKA  
RGWLEQRVSQIVATVRANND RDSL VGAMIFGRDDNGNGMSEVELVHNILGLGFAGSETTA  
AVMAWSALMLSQH PHVWQQLCQQVAGLDSVPYTHEELVKQVPLAE AIFRET LRLYPPAPF  
EMRKVHTEFEMMGHTVPAGAMVGVSL LHVS RHPERYPD PDSWRPERWLGM DRAPNQVESC  
QFGGGPHTCLGRHVA ALEITLFIAM LAREMGPGKIS PRLVGKLP PPTYLPFLRPSNKAFL  
DLTGR

>U875\_08260|KEGG|CYP116B197|[Pandoraea pnomenusa]ppk|BP

MSQTSSPTADTGACPFHQATAAKAPNGCPISARAAEFDPFEDGYQQDPPEYVRWAREQEP  
VFYSPKLG YWVTRYDDIKAI FRDNITFSPSIALEKITPTGPEANAVLAS YGFALNRTL V  
NEDEPAHMPRRRVLMEPFTPEHLKHHEPLVRQLAREYVDRFVNDGRADLVDQMLWEVPLT  
VALHFLGVPEEDMDKLREYSIAHTVNTWGRPKPEEQVAVAHAVGNFWQLAGKILDKMRQN  
PDGPGWMQY GIRKQKEHPEVVTDSYLHSM MMAGIVA AHETTANATANAMKLLLQHPDVWR  
EICEDPSLIPNAVEECLRHNGSVAAWRRLATKDVNIGGV DIAAGAKLLIVTSSANHDEAH  
FADADLFDIRRENASDQLTFGYGSHQCMGKNLARMEMQIFLEEFTRRLPHMKLAEQKFTY  
VPNTSFRGPEHLWVEWDPAQNPELRDPSILARHSPVRIGEPSGHSVTRPVVVESVSPVAD  
GIVKLRLVAPDGRAMPRWAPGSHIDVECGDTGLSRQYSLCGDPADVGA FEI AVLHEPQGR  
GGSNWMHTQVKVGDRLRVRGPRNHFR LDETT PRAIFVAGGIGVTPIAAMARRAKALGMDY  
EIHYSGRSRRTMALVDELRLHGERLHLWVKDEGQRADYVALLATPQAGTQVYACGPVRL  
LDALAECCAYWPDDTLRVEHFQS QLGTL DPEKEHAFEVTLKDSGITLTPADQTLLTALR

AANIDVQSDCEEGLCGSCEVQVLEGDVDHRDVVLTRAERDANTKMMSCCSRACGKKLVLA  
L

>R007\_12270|KEGG|CYP212A13|[Pandoraea pulmonicola]ppul|BP

MSDDL LGALAAWQREYGDVVHLRIWPEHTVVVTDPSLVRELLITHHNALIRWERGVRVMS  
QLHGHSVLIAEGGAWHQKRQALQPDFLPKAVQAFAPNIVGATAQALAAWPEHDARWP  
ALTSLTMDV IIRQVFSEETDDDIRVAEDAMRIASEANA EFYWPVSWPDWAPWKRKKRRA  
LRILKGLVDRHVQMRLATPDDAWPDDLRLRLHRGNAQAWPLEAARDECMTTFLAGHE  
TTAATLTWWAWCMASNPTMQAAAREEVTRVLSGGLPISASRQSLPYLAQTLDETLRLYPT  
APTLISRRAIAPVTLGDWTFPARTLFMLPVQLMQHDARWFEAPGEFRPERFAAGAAQIPR  
GAHMPFGAGPRVCLGQHLALT KALLIAAMILQRFELSVPAGAQPQPRLNVTLRPAQPLR  
LEIAQRRR

>SG18\_23715|KEGG|CYP116B192|[Pandoraea apista]papi|BP

MSQTISPTPD TAAASAGGCPFHQTAPVTAPNGCPVSARAADFDPFEDGYQQDPPEYVRWA  
REQEPVFYSPKLG YWVTRYDDIKAI FRDNITFSPSIALEKITPTGPEANAVLASYG FAL  
NRTL VNEDEPAHMPRRRVLMEPFTPEHLKHHEPLVRQLAREYVDRFVNDGRADLVDQMLW  
EVPLTVALHFLGVPEEDMDKLREYSIAHTVNTWGRPKPEEQVAVAHAVGNFWQLAGKILD  
KMRQNPDPGPGWMQY GIRKQ QEHPEVVTD SYLHSM MMAGIVAAHETTANATANAMKLLLQH  
PDVWREICEDPSLIPNAVEECLRHNGSVAAWRRLATKDVTIGGIDIPAGSKLLIVTSSAN  
HDEAHFADADLFDIRRENASDQLTFGYGSHQCMGKNLARMEMQIFLEEFTRRLPHMKLAE  
QSFTYVPNTSFRGPEHVWVEWDPAQNPERRDPAVLTRHSPVRIGEPSGHSVTRPVVVE SV  
TPAAEGIVKLRLVAPDGR TMPRWAPGSHIDIECGDTGLSRQYSLCGDPSDAHA FEI AVLH  
EPEGRGGSNWVHTQVKIGDRLRIRGPRNHFR LDESI SRAIFVAGGIGVTPIAAMARRAKT  
LGIDYEVHYSGRSRRTMALLDELQTLHGDR LHLWVKDEGQRADYASLLATPQNGTQVYAC  
GPVRMLDGLAQCCAHPEDTLRVEHFQS QLGTLDP EKEHAFEVTLKDSGITVTVPADQTL  
LTALRAANIDVQSDCEEGLCGSCEVQVLEGDVDHRDVVLTRAERDANTKMMSCCSRACGK

KLVLAL

>AT302\_08215|KEGG|CYP212A15|[Pandoraea norimbergensis]pnr|BP

MNTRTPPQCPFHGDAAAASEATAPTLHPPGVWPPGPSAGITGWGLLRQMSGDLLGTLAQW  
KRTYGDVVYVRFWPEHAVVVTDPQLVRELLVTHHHSLIRWERGAVVMSQLHGHSVLIAEG  
EAWHRKRQTLQPYFLPKSVQTFVPHITAATARALDAWPQRDAHWSIESALTSMTDVIMR  
QVFSGEIGDEARMAERALRVASEAADAIFYWPASWPDWMPWKREKRHAVRGLKGLIDRHV  
NARLAMPDPAWPDDLLSRLRLHQEDPQTWSLQAVRDECMTTFLAGHETTAGTLTWAWC  
MASNPAMQEAAREEVIRVLGSAGEIVPTAETRPALRYLSQTIDETLRLYPAPTLLSRRA  
TRPITLGPWQFPARTLFMLPVQLLQHDARSFAEPTAFRPERFASDAPAPPRGTHMPFGAG  
PRVCLGQHLLATTEIIVIAAMILQRFTLSVPEGMEAPKPRMHVTLRPETALHLGLTAIPSI  
DV

>DRB87\_05310|KEGG|CYP229G2|[Pandoraea sp.]pand|BP

MSAATADRLTVPPPANALAAVVHPNPYPYYQSLAARRPFDASLGMWVAAS PQAMAAVL  
RHPACGVRPAGATVPAALANGAAGDWFGTLVRMNDGAAHAAMKPWLKARLATLHADGATL  
DRLRNASQAACADAYLAQGQTPSARLDDFVFRQPIYALAAWLGVPPSQWVDVYDDVRTL  
AAMAESTQSSAHAETLARGHSAATTLRHRAMRWLDNDAAPGTWLRDTARSAARDEAVDYA  
ALTANVVGLFTQTHDACAGLVANSLRRLAQHASPGAVPALNSAQSLPANLTVAITAIGEV  
IRHDPPVQNTRRFLHAPAIHERTLARGDAILVVLAAAPARAAPDDVAWTFGHGAHTCPG  
RSPASTIAAIGVQTILDSVDLAAIATGSTYHPLGNIRIARFHSAAAA

>PI93\_012205|KEGG|CYP116B196|[Pandoraea fibrosis]pfib|BP

MSQTISPTPDTTAASAGGCPFHQTTPAKAPNGCPVSARAAEFDPFEDGYQQDPPEYVRWA  
RDQEPVFYSPKLGWVVTRYDDIKAI FRDNITFSPSIALEKITPTGPEANAVLASYG FAL  
NRTL VNEDEPAHMPRRRLMEPFTPEHLKHHEPLVRQLAREYVDRFINDGRADLVDQMLW  
EVPLTVALHFLGVPEEDMDKLREYSIAHTVNTWGRPKPEEQVAVAHAVGNFWQLAGKILD  
KMRQNPDPGPGWMQYGIRKQKDYPEVVTDSYLHSM MMAGIVA AHETTANATANAMKLLLQH  
PDVWREICEDPSLIPNAVEECLRHNGSVAAWRRLATKDVNIGGIDIAAGSKLLIVTSSAN  
HDEAHFADADLFDIRRENASDQLTFGYGSHQCMGKNLARMEMQIFLEEFTRRLPHMKLAE  
QSFTYVPNTSFRGPEHVWVEWDPAQNPERHDATVLTQRQSPVRIGEPSGHSVTRPVVSV

TPVAEGIVKLRLVAPDGRAMPRWAPGSHIDIECGETGLSRQYSLCGDPLDASAFEIAVLH  
EPEGRGGSNWVHTQVNI GDR LRIRGPRNHFR LDETTSRAIFVAGGIGITPIAAMARRAKA  
LGIDYDIHYSGRSRRTMALIDELQTLHGERLHLWVKDEGQRADYARLLATPQEGTQVYAC  
GPVRMLDSL AQCC THWPEDTLRVEHFQSQLGTLDPEKEHAFEVTLKDSGITVTVPADQTL  
LTALRAANIDVQSDCEEGLCGSCEVQVLEGDVDHRDVVLTRTERDANTKMMSCCSRACGK  
KLV LAL

>PI93\_021335|KEGG|CYP125U1|[Pandoraea fibrosis]pfib|BP

MKIGDVNLADPD AFFTAVPYDYFAMMRREAPVSWVPRVGDDGFWSITRYADIADVEKRPE  
VFSSRANILPLPIPEYTLARDIDHNIILSDPPRHGFLRRVIMSAFTQKAILGINERVRL  
TTRIIDS VIESGECNLVDVAAYVPIEIVA EMLGVPESDRARLFAWADATVGSADPDATRH  
ISSKQAAEEMFEYASRLGAERRRNPQGDIFSTIAAAKENGERSDVDLGCFLLLLATAGT  
ETTRTQILQGSLALIEHPDQRRKLIEDRSKLPNAIEEMLRWSTPAMCFGRKALVDTQVGG  
QAIKAGQQVVLWYCSGSRDES VFANPDVFDVDRHNAREHQAFGVRGSIHQCLGSMLARSE  
LVAVFDALLERMPDMSLAGPVVRLRSNFANGIKQMPVRFTPGIVLGDGPSARWYAAENEG  
CPAHSSPSATRCPVTSHGE

>SBC2\_20620|KEGG|CYP195A25|[Caballeronia sp.]caba|BP

MTPTERALDFDLRKLDAAFYADPYPVYDALRATDPIKTLPDGSLFLTRYRDVQAVYRDPK  
TFSSDKTVEFGPKYGVHTPLFAHHTTSLVFNDPPRHTRVRKLIAGALTARAI AAMEPGLV  
RLVDGLLDQAAARGEIDLIDDFAAAI PVEVIGNLLDMPHDERAPLRDWSLAILGALEPAL  
NPEQEARGNRAVTD FIDYLVTLVARRRAHSGDPQHDLVTRLIQSEADGERLDETELLHNC  
IFILNAGHETTTNLIGNGIVLLAQWPEQRAQLLADPTLIESAIEECLRYESSNQLGNRIA  
TADTHIAGVAVARGTPVTL CIGAANRDPEQFEAADCFDIAREPNRHLAFGFGI HQCAGLS  
LARLEARIAIGRFIARFPNYGLAGEPLRASRARFRGFVKAPVRVG

>SBC2\_72680|KEGG|CYP289A14|[Caballeronia sp.]caba|BP

MSMNEKPTNDWDPRSEAVTHDQVAAYDEMRRHRCPVAHSDYLNLSLFRHDDVMRVLNDPET  
FSSAVSSYLSVPNGMDPPEHTQYRTIVEPYFSPQRMVAFEPVCRDIAATLVNGLSRGREL

EFNAQFAQDFAMNIQCAFLGWPQELRAPLLHWIRKNREATLTGDRIALDRVAVEFDITYIK  
GLLAQRRQSGAEAQDDITTSLLRERIGDRLLHDDEIVSVLRNWTVGELGTIAACIGILAH  
YLAEHDPDVQQLREQPSVLPKAIDEILRIRAPLIANRRISTKSVKIGGHEVPVGQRITLI  
WASSNRDETTFVGGDPDEFRLDRDPASNLLYGSGIHVCPGAPLARLELRVGMEELLERTNWI  
ALVPGSPLTKAVYPAAGFSALPLRIE

>BRPE64\_DCDS12190|KEGG|CYP116B12|[Caballeronia insecticola]buo|BP

MTDAAGENRAPQCPFHVDVAGAQAALAPNGCPVSARAAEFDPFGDGYSDPPEYVRWAREQE  
PVFWSPQLGYWVVTRYDDIKAIFRDNLTFSPIALEKITPTGPEANAVLASYGFALNRTL  
VNEDEPAHMPRRRALMDPFTPEALAHHEPMVRALAREYVDRFIDDGRADLVDQMLWEVPL  
TVALHFLGVPEEDMDTLRLYSIAHTVNTWGRPKPEEQVEVAHAVGKFWQFAGKVLDKMRE  
DPSGAGWMQYGIRKQKDMPEVVTDSYLHSMMMAGIVAAHETTANATANALKLLLQHPEAW  
RDICEDPSLIPNAVEECLRHNGSVAAWRRLATKDVTIGGIRVAAGSKLLIVTSSANHDQH  
QFADADLFDIRRENASDQLTFGYGAHQCMGKNLARMEMQIFLDELTRRLPHMRLAEQRFT  
YVPNTSFRGPEHLYVEWDPANPERADPSVREPRAVVRIGEPSSHAASRAVTVASVEACA  
DRIVRVRLVPADGRALPRWTAGSHVDVVCDSGISRQYSLCGDPADAGALEIAVLRETAS  
RGGSAAVHENVKPGAQWHIRGPRNHFRLDDETAKRLVLIAGGIGITPISAMARRARALGID  
YAVHYSGRARTSMALLDELRLALHGERLFTYISDEGARNDFAALDVNEDTQVYACGPARM  
DALAQASARWPEDALKIEHFESKLGTLDPKSKEHAFDVELKDSGLVLTVPADQTLTTLRR  
ANIDVQSDCEEGLCGSCEVRVLDGEIDHRDVVLTKGERQSNRMMACCSRAKGKRLVLAL

>BRPE64\_ECDS01410|KEGG|CYP1112A12|[Caballeronia insecticola]buo|BP

MLVDPYPAYRALRELGEVVYLTHSKLYALTGYDVIKDALADPTRFSSAQGVGFNDGVNHA  
LQGTSLASDPPEHTQLRAALSENLTPRALRGLGEQIKANAQALVAHLVEQQSFDAIDDIA  
RRFPIGVVADLVGFQGDARANMLRWGQAAMEVIGPMNRRTAENFPIAGELYGYCSQITQD  
ALTPGSGVGVFEAERKGIVPEGAARHIIHQYLGLDITLAAIGNTVALFGRFPPEEFAK  
VRDDLSTLVPSAFNEVLRYYSPVHVWSRVATQEVKGVNVKIPDGSRIAILGAGNH DARHY  
RDPEVFDVTRNPIDHLSFGYGPHGCAGQGLARMEGAIIIEALATQIKSFRIGEVARAPSN  
VTVSFDTVPVLELEAV

>HKT17\_08605|KEGG|CYP153A108|[Limnobacter sp.]limn|BP

MTTKSSMSGTIQTKVINATAKIVPMNLQIRALKVLMKAKRKTIGPKTPMLHFVESPLPDV  
TTLSIEEIDASNPFYRQKCSAYFKRLRDEAPVHYQKNSPFGPYWSITRFDDILYVDKN  
HQLFSSEPQIVLGDPPDGLSVEMFIAMDPPRHDKQRRAVQGVVAPQNLREIEGLIRSRTG  
EVLDSLPLNEPFWVPKVSKELTARMLATLLDFPYEERHKLVGWSDRLSGASSATGGEST  
NEDVMFDDAADMAWSFSTLWRNKEADRAAGEKVGFDLISMMQSNEDTKDLINRPMEFIGN  
LALLIVGGNDTTRNSMSGVLAALNRFPEEFVKLKANPGLIPNMVSEIIRWQTPLAHMRRV  
ATQDVELHGQTIKKGDRVVMWYASGNRDERKFENPDQFIIDRHDARNHMSFGYGVHRCMG  
NRLAELQLRILWEELLKRFDIEVVGEPELVQSNFVRGYSKLMVKLTEKSR

>FNU76\_17870|KEGG|CYP1202B1|[Chitinimonas arctica]cari|BP

MPTSATLPGSPPLRAPKPAGQLLLGHLPYRADMLGFLSRRAELGDIFRIRLGLRHLH  
VLGHPDMAEQVLIKDKARFGKLAELAELGSKREIGLGLVLGKGLVTNYGESWRRQRQMIQ  
PMFHKAQIAAMADAMTAAGDRLLAHWRTSYQPGQTVDVQAQEMMRVTVDVVSQTMFGADLV  
DKACFVGDRFPLLLRYAFSSISNPFSPPPSWPTARNRAFHKAMQELDELLYGLIDQRLQR  
GEPRGDLDDLMLLVARDHESETGMSVRQLRDEVATIFGAGHETTANALTWTWYLLSRHPEA  
KRKLKEELASVLGGRTPTFADLPRLVYTRAVFEESMRLFSAPALPRAVLQDTTVAGYGL  
RRGELVMVSDLLHHHPAFWREPARFDPERFLPGAVPLQAHRCAYLPFGAGPRVCIGNHF  
ALMEGQLLLAQIAQRYDLQLVSGHPVEREVAVTMRPRYGMPMKLVEIT

>BP2405|KEGG|CYP240A1|[Bordetella pertussis]bpe|BP

MIADTARQHRGDSMQPADPLEAVAHDPYPYAAALARERPFYHDDRLGLWVAAGPQAIRA  
VLTCPAARVRPPGEPVPAALGAGPAAQMFGRFIRMNDGAVHERLKPMLTAYLTQRTAADL  
AEPAPWPAIGNDPAQVDYLYQAPVHAQAACLMGLPDEVAASCAREIEAFMAACRPGADAAA  
VARADQAAQALQARMLAHLRAARGDAALGVLRRLLALAGGVEADALAANLAGLLLSCEAG  
AGLLDNALVHAGRLSPAAAPDLLHTCVEIVTHVARHDPPLHNTRRFLAAPATLLGQSAPA  
GAGILVVLAAAHALAEGAWPWTFGAERHACPGRTPALLHAAQALAHALRHGVDAPALARC  
VRYRPLPNARVPRFHFPPGDTP

>BPTD\_2362|KEGG|CYP240A1|[Bordetella pertussis]bpc|BP

MIADTARQHRGDSMQPADPLEAVAHDPYPYAAALARERPFYHDDRLLGLWVAAGPQAIRA  
VLTCPAARVRPPGEPVPAALGAGPAAQMFGRFIRMNDGAVHERLKPMLTAYLTQRTAADL  
AEPAPWPAIGNDPAQVDRLYLYQAPVHAQACLMGLPDEVAASCAREIEAFMAACRPGADAAA  
VARADQAAQALQARMLAHLRAARGDAALGVLRRLLALAGGVEADALAANLAGLLLSCEAG  
AGLLDNALVHAGRLSPAAAPDLLHTCVEIVTHVARHDPPLHNTRRFLAAPATLLGQSAPA  
GAGILVVLAAAHALAEGAWPWTFGAERHACPGRTPALLHAAQALAHALRHGVDAPALARC  
VRYPRLPNARVPRFHFPPGDTP

>BN118\_2610|KEGG|CYP240A1|[Bordetella pertussis]bper|BP

MIADTARQHRGDSMQPADPLEAVAHDPYPYAAALARERPFYHDDRLLGLWVAAGPQAIRA  
VLTCPAARVRPPGEPVPAALGAGPAAQMFGRFIRMNDGAVHERLKPMLTAYLTQRTAADL  
AEPAPWPAIGNDPAQVDRLYLYQAPVHAQACLMGLPDEVAASCAREIEAFMAACRPGADAAA  
VARADQAAQALQARMLAHLRAARGDAALGVLRRLLALAGGVEADALAANLAGLLLSCEAG  
AGLLDNALVHAGRLSPAAAPDLLHTCVEIVTHVARHDPPLHNTRRFLAAPATLLGQSAPA  
GAGILVVLAAAHALAEGAWPWTFGAERHACPGRTPALLHAAQALAHALRHGVDAPALARR  
VRYPRLPNARVPRFHFPPGDTP

>B1917\_2316|KEGG|CYP240A1|[Bordetella pertussis]bpet|BP

MIADTARQHRGDSMQPADPLEAVAHDPYPYAAALARERPFYHDDRLLGLWVAAGPQAIRA  
VLTCPAARVRPPGEPVPAALGAGPAAQMFGRFIRMNDGAVHERLKPMLTAYLTQRTAADL  
AEPAPWPAIGNDPAQVDRLYLYQAPVHAQACLMGLPDEVAASCAREIEAFMAACRPGADAAA  
VARADQAAQALQARMLAHLRAARGDAALGVLRRLLALAGGVEADALAANLAGLLLSCEAG  
AGLLDNALVHAGRLSPAAAPDLLHTCVEIVTHVARHDPPLHNTRRFLAAPATLLGQSAPA  
GAGILVVLAAAHALAEGAWPWTFGAERHACPGRTPALLHAAQALAHALRHGVDAPALARC  
VRYPRLPNARVPRFHFPPGDTP

>Q425\_22250|KEGG|CYP240A1|[Bordetella pertussis]bpeu|BP

MIADTARQHRGDSMQPADPLEAVAHDPYPYAAALARERPFYHDDRLLGLWVAAGPQAIRA  
VLTCPAARVRPPGEPVPAALGAGPAAQMFGRFIRMNDGAVHERLKPMLTAYLTQRTAADL  
AEPAPWPAIGNDPAQVDRLYLYQAPVHAQACLMGLPDEVAASCAREIEAFMAACRPGADAAA



VARADQAAQALQARMLAHLRAARGDAALGVLRRRLALAGGVEADALAANLAGLLLSCEAG  
AGLLDNALVHAGRLSPAAAPDLLHTCVEIVTHVARHDPPLHNTRRFLAAPATLLGQSAPA  
GAGILVVLAAAHALAEGAWPWTFGAERHACPGRTPALLHAAQALAHALRHGVDAPALARC  
VRYRPLPNARVPRFHFPPGDTP

>BN117\_3234|KEGG|CYP240A1|[Bordetella parapertussis]bpar|BP

MIADTARQHRG DIMQPADPLEAVAHDPDPYPYAAALARERPFYHDDRLGLWVAAGPQAIRA  
VLTCPAARVRPPGEPVPAALGAGPAAQMFGRFIRMNDGAVHERLKPMLTAYLTQRTAADL  
AEPAPWPAIGNDPAQVDRLYQAPVHAQACLMGLPDEVAASCAREIEAFMAACRPGADAAA  
VARADQAAQALQARMLAHLRAARGDATLGVLRRRLALAGGVEADALAANLAGLLLSCEAG  
AGLLGNALVHAGRLSPAAAAAPDLLHTCVEIVTHVARHDPPLHNTRRFLAAPATLLGQS  
VPAGAGILVVLAAAHALAEGAWPWTFGAERHACPGRTPALLHAAQALAHALRHGVDAPAL  
ARRVRYRPLPNARVLRFRHFPPGDTP

>BPP3270|KEGG|CYP240A1|[Bordetella parapertussis]bpa|BP

MIADTARQHRG DIMQPADPLEAVAHDPDPYPYAAALARERPFYHDDRLGLWVAAGPQAIRA  
VLTCPAARVRPPGEPVPAALGAGPAAQMFGRFIRMNDGAVHERLKPMLTAYLTQRTAADL  
AEPAPWPAIGNDPAQVDRLYQAPVHAQACLMGLPDEVAASCAREIEAFMAACRPGADAAA  
VARADQAAQALQARMLAHLRAARGDAALGVLRRRLALAGGVEADALAANLAGLLLSCEAG  
AGLLGNALVHAGRLSPAAAAAPDLLHTCVEIVTHVARHDPPLHNTRRFLAAPATLLGQS  
VPAGAGILVVLAAAHALAEGAWPWTFGAERHACPGRTPALLHAAQALAHALRHGVDAPAL  
ARRVRYRPLPNARVPRFHFPPGDTP

>BN112\_4694|KEGG|CYP240A1|[Bordetella bronchiseptica]bbh|BP

MIADTARQHRG DSMQPADPLEAVAHDPDPYPYAAALAREQPFYHDERLGLWVAAGPHAIRA  
VLTCPAARVRPPGEPVPAALGAGPAAQMFGRFIRMNDGAVHERLKPMLTAYLTQRTAADL  
AEPAPWPAIGNDPAQVDRLYQAPVHAQACLMGLPDDVAASCAQEIEAFMAACRPGADAAA  
ARRADQAAQALQARMLAHLRAARDDAALGVLRRRLALAGGIEADVLAANLAGLLLSCEAG  
AGLLGNALVHAGRLSPAAAAPDLLHTCVEIVTHVARHDPPLHNTRRFLAAPATLLGQSLP

EGASILVVLAAAHALAEGAWPWTFGAERHACPGRTPALLHAAQALAHALRHGVDAPALAR  
RVRYRPLPNARVPQFHFPSGDAP

>BB3721|KEGG|CYP240A1|[Bordetella bronchiseptica]bbr|BP

MIADTARQHRGDMQPADPLEAVAHDPYPYAAALARERPFYHDDRLGLWVAAGPQAIRA  
VLTCPAARVRPPGEPVPAALGAGPAAQMFGRFIRMNDGAVHERLKPMLTAYLTQRTAADL  
AEPAPPAIGNDPAQVDYLYQAPVHAQACLMGLPDEVAASCAREIEAFMAACRPGADAAA  
VARADQAAQALQARMLAHLRAARGDAALGVLRRLLALAGGVEADALAANLAGLLLQSCEAG  
AGLLGNALVHAGRLSPAAAAAAPDLLHTCVEIVTHVARHDPPLHNTRRFLAAPATLLGQS  
VPAGAGILVVLAAAHALAEGAWPWTFGAERHACPGRTPALLHAAQALAHALRHGVDAPAL  
ARRVRYRPLPNARVPRFHFPPGDTP

>BN115\_3393|KEGG|CYP240A1|[Bordetella bronchiseptica]bbm|BP

MIADTARQHRGDSMQPADPLEAVAHDPYPYAAALARERPFYHDDRLGLWVAAGPQAIRA  
VLTCPAARVRPPGEPVPAALGAGPAAQMFGRFIRMNDGAVHERLKPMLTAYLTQRTAADL  
AEPAPPAIGNEPAQVDYLYQAPVHAQACLMGLPDEVAASCARDIEAFMAACRPGADAAA  
VARADQAAQTLQARMLAHLRAARDDAALGVLRRLLALAGGVEADVLAANLAGLLLQSCEAG  
AGLLGNALVHAGRLSPAAAAAAPDLLHTCVEIVTHVARHDPPLHNTRRFLAAPATLLGQS  
VPAGAGILVVLAAAHALAEGAWPWTFGAERHACPGRTPALLHAAQALAHALRHGVDAPAL  
ARRVRYRPLPNARVPRFHFPPGDTP

>BBS798\_3501|KEGG|CYP240A1|[Bordetella bronchiseptica]bbx|BP

MIADTARQHRGDMQPADPLEAVAHDPYPYAAALARERPFYHDDRLGLWVAAGPQAIRA  
VLTCPAARVRPPGEPVPAALGAGPAAQMFGRFIRMNDGAVHERLKPMLTAYLTQRTAADL  
AEPAPPAIGNDPAQVDYLYQAPVHAQACLMGLPDEVAASCAREIEAFMAACRPGADAAA  
VARADQAAQALQARMLAHLRAARGDAALGVLRRLLALAGGVEADALAANLTGLLLLQSCEAG  
AGLLGNALVHAGRLSPAAAAAAPDLLHTCVEIVTHVARHDPPLHNTRRFLAAPATLLGQS  
VPAGAGILVVLAAAHALAEGAWPWTFGAERHACPGRTPALLHAAQALAHALRHGVDAPAL  
ARRVRYRPLPNARVPRFHFPPGDTP

>Bpet1785|KEGG|CYP240A4|[Bordetella petrii]bpt|BP

MARRARRLRGAAGLTPAIFRPASKRHGRPAPHTGAMHPADPIQAVTHPDPYPYYRTLARE  
RPLYYDPALGLWVASSPPLIHAVLAHRAARVRPAAEPVPRALGDDAAGLLFSRFVMRDD  
AAHAGLKPLLVDCLQALPCGGAPCWPAAPHTLPGLDEFLLFAAPVYAMASRLGLAQPAIAA  
CARDVRLFRAALGPAATADQLAAGHAAAARLQTAMMEHLHAQADDAPLALLRSRAAQAEF  
EPAEVAANLAGLLFQSCEAGAGLVGNTLAALGRDPGLCAAARRDAALCLHAAAHTARHDP  
PVHNTRRYLDASMSLDGQVLPAGATVLLVLAAAGAAAPGDAPWTFGAGRHACPGRTPALQ  
AAGQAVAFLLDAGLEPAALTQKLGWPLPNARVPRFARHGVQAK

>ACR54\_04430|KEGG|CYP199H1|[Bordetella hinzii]bhz|BP

MSQSQLAAPVVDWDPYDDAVLES PFEMHARLRAAGPLVFLERYGVYAMGRHRDIQPALKD  
WETYSSTSGSGIADIRKPGAWRPGSPIVEVDPPQHTQVRTAVQRILSPVVIRQWRGDFER  
EADRLVAELVERGRFDGVTDLAETYVATTFPDALGLAPSPQRRENLFLLGELNFDGQGPR  
NARYLATQARADLIQDWYEASMRREAMLPGGFGKEKIFQAADAGAI DPAIAPLLVRSFLRG  
GLDTTSSSISATLAYLARDPAQFALLREDPGRARAAL EAMRLETPIQTVCRLTMRDVAI  
DGVAVPRDNKIVMMLASANRDPDFWERPDDYDMTRSTLGHVALGNGIHMCIQGMVARLEG  
ESVLKAVAKHIGELRLEGE PVRKLNNNLRSLSKSIPLSVKPA

>SAMEA390648700219|KEGG|CYP212A17|[Bordetella trematum]btrm|BP

MARDLPGALAAWQQRHGDVVHLRLWPEHV VVLCDPQLARELLLEHHDALIRWERGVRFAFA  
QIHGQSVLTTEGDWRSRRQALNPGFSPKAVQAFAPLIISTAAQSLARWPQEDARWP IES  
RLAEMTMEVILQMVFSGSHEEDAGAIEEAVRITSATTHAAFYAAASLPDWLPWKRRQRR  
RLLLQTMIERQVQARLAIARDAWPPDLLSRL LTCQPDLSASSLRDVRAECMTLFLAGHET  
TAATLTWWAWCMAANPQAQSRAREDVRLALGPDTPSVDALQNAGYLSQTLKETMRLYPAA  
PMLMSRRTTRPLRLGSWTFAPRTL FMI PVQAIQADARRFPDPQRFQPERFAKQAPEIPRG  
AYFPFGAGPRVCLGQHLAMTEMGLLAALMLQRFEFSVCE DAPPPRPVLNVTLRPAQALRL  
AIKRIDGG

>CBF45\_10850|KEGG|CYP1232F2|[Bordetella sp.]boj|BP

MDVLTTDVPVADWVDLAELMADPYPTYARLRREMPVAWVPALNRFLVTGFDACFQAEILDQ  
ETFSSHEDAERSTQVRTMGRSMLRKDDPEHKRDRAASAGALRPVTIRKVWMDIFERNASR  
YLQHVQALGPGVDIFREFAVPFAADNLCAILGLRGVDASTMMDWSHTLIAGIGNVTDDQD  
VWRETQVRVRYEMDAAIDESVAWLSREPDASMLSAMLHAAEPLSDEAMRANVRLTVSGGMN  
EPSHVIGSAIWALLTHPDQLAEVRAGVWNWADVFEETARWQSPVGMYPRLVRKETWLAGV  
RIPAGATVGLVIASANRDERRFSHAERFDLRRERLTNLAFGNGTHICAGNWAARAMIGNV  
ALPRLFEALPGLRLEDPQAVAFRGWVFRGVRSLPVCWEAT

>AXYL\_01591|KEGG|CYP240A3|[Achromobacter xylosoxidans]axy|BP

MHPAHPLQAVTHPDYPYAAALARERPLYREAALDLWVASHPDTIAAIMRHPAARVRPVA  
EPVPKGLGTGPAADLFGRFVRMNDRIHQVQVKTLLSAFIREQGAQTCPPAWPDGPLNAM  
AVDRYLSAAPVHAQAFLGLPPDLYADCAADIAAFLSALPATATADRIEAGHAAAMRLQT  
RLESHLQAPDAAPALRRLREDGARAGIVPALLAANLAGLLFQSCEAGAGLLGNAILLAGR  
RGLPADPTEDAALALMDEVERSDPPLHNTRRFLAADIDIGGQRIAAGQTVLLVLAAAATV  
QPEAHWTFGAHGHACPGRLPARQHAAGALSHLLRAGIDAAALAARFRYRPLPNARVPQFD  
FSEEPAP

>AXYL\_03286|KEGG|CYP116B81|[Achromobacter xylosoxidans]axy|BP

MGHPSTPAPTTPPANTGGCPIDHAALARAQACPVSPRAAEFDPFGDGYQQDPPEYVRWARE  
QEPVFYSPKLGWVTRYDDIKAVFRDNHTYSPSIALEKITPTGPEANAVLATYGYAMNR  
TLVNEDEPAHMPRRRVLMDPFTPDELKHHEPMVRRLTREYVDRFIDDGRADLVDQMLWEV  
PLTVALHFLGVPEEDMDLLRKYSIAHTVNTWGRPKPEEQVEVAHAVGNFWQLAGKILDKM  
RQDPDAPGWMQYGIRKQKDHPEVVTDSYLHSMMMAGIVA AHETTANASANA IKLLLQHPD  
AWRELCEDPGLLPNAVEECLRHNGSVAAWRRLATRDTEIAGVAIPAGAKLLIVSSSANHD  
ERHFADADFFDIRRDNASDQLTFGYGAHQCMGKNLARMEMQIFLEELTRRLPHMRLAQQQ  
FTYVPNTSFRGPEHLWVEWNPADNPERRDPALLVQAQPVRI GEPSTHAISRKL VVTQVTA  
AADGIARIRLES PDGKPLPRWTPGSHIDVECGDTGLSRQYSLCGDPAAANALEIAVLKET  
AGRGGSAWIHQHLRAGSIVRARGPRNHFRMDESAKRLIL IAGGIGITPISAMARRARELG

MAYELHYSGRSRACMAMLEELQQLHGERLRLHISGEGSRNDF AALLSLPEAGTQIYACGP  
ERMLDALQAACSAWSEDSLREHFHSTLATLDPSKEHAFAELKDSGIVVQVPAGQTLTLT  
ALRSANIDVQSDCEEGLCGSCEVRVLGGAVDHRDVVLTRAEREAGTRMMACCSRAQGGRI  
VLEL

>AXYL\_03542|KEGG|CYP1110A2|[Achromobacter xylosoxidans]axy|BP

MRPTDIPDLKSAAFLADRYPTYRRLQSDFPHFEMDINGEECIVLTRYSDVDEVLRNPLAT  
VQQAPGVFPERIGQGAGARFYRESLPNIDAPDHTRIRRIVTPAFNPKTVANMRGWVEKVI  
VEHLDRLEGQDEIDFVSSFADPVP AEIACQLLHVPVSDAPELFARQHGLNAVLSVSDITP  
ERLAEADASAAYYYEYMDDVLDTLKGKLPEDDFVGALMAAEGGDNGLTRSELVTTLIGFL  
VASYHTTKVAMTNTVLTLLNHDGERARLVAQPD LARNAWEESLRYDSPVHFVHRYASEPL  
TIGGQPVAQ GKRLLLGLHAASRDENRFAQADHYLIDRPDNRHLAFAGGGHFCLGSQLSRL  
EGDVLLRTIFQRFPAMRLTETRFEVRVDPDLTFPMLLRMTVSLRAGQG

>AXYL\_04967|KEGG|CYP108S2|[Achromobacter xylosoxidans]axy|BP

MNHTDFDLPSDVAKALVNAQVYANIDELHSTYSWARANNPLGRAVNEGFDPFVWVTKHAD  
VAAISRDSQIFRNGDYATISAPKAMIDHLKAVTGSYNGGIKTLVHVDGDEHKGLR TLTQA  
WFMPNSILKLDERIRDLACRTVDKLAAAEGEVIDFATQIALHYPLHVIMDILGVPAEDEA  
RMLLLTQELFGTEDPEFKREGKDAGGNDDALAQNVLAI VADFRAYFEKVTADRRVNPRND  
VATLLANAVIDGVPLSEDSRLGYYVIIATAGHDTTSSSTAVAMWALSQYPELLPRLQANP  
GLIPQFIDEAVRLASPVRRHFMRTAAADTEIRGRIHKGDWLMLCYGSANRDEDVFENPFE  
FNIDRKPNRHLSFGLGAHICLGQHLAKMEMRILFEEMI PRLQRVELAGDMAMSASC FVGG  
PKHLPVRCFMN

>NH44784\_004871|KEGG|CYP240A2|[Achromobacter xylosoxidans]axo|BP

MSTPFPTDPLQAVTHADPYPPYAGLARDRPLYRDARLGLWVASAPGTIHDIMRHPAARVR  
PMAEPVPRGIAAGPAGLLFGRFLRMNDGPRQARLKALFRAFLARQAPLAPAPDWPRLEMD  
TGSAGAI DRYLHAAPVFAQACALGLPGAVAAECAREVGAFLAALPPAAPEDRVAAGHTAA  
ERLLARLGAHLDDRAASPALRELGRGADAGLEPALLAANLAGLLFQSCEAGAGLLGNAL  
LRAGRQRAGAALT LAQAWELVDATLRHDPPIHNTRRFLAGPIELEGLMQAGETVLLALA

AAAMAQPEAHWTFGAQSHACPGRDAARRDAAGALVHLLRAGVDGAALAAFRYRPLPNAR  
IPQFDFTEEPTP

>AX27061\_1499|KEGG|CYP240A2|[Achromobacter xylosoxidans]axn|BP

MSTPFPTDPLQAVTHADPYPYAALARDRPLYRDARLGLWVASAPGTIRDIMRHPAARVR  
PMAEPVPRGIAAGPAGLLFGRFLRMNDGPRQARLKALFRAFLARQAPLAPAPDWPRLEMD  
TGSAGAIIDRYLHAAPVFAQACALGLPGAVAADCAREVGAFALAALPPAAPEDRVAAGHTAA  
ERLLARLGAHLDDRAASPALRELRGQGADAGLEPALLPANLAGLLFQSCAAGAGLLGNAL  
LRAGRQRAGAALTTLAQAWELVDATLRHDPPIHNTRRFLAGPIELEGGQLMQAGETVLLVLA  
AAAMAQPEAHWTFGAQGHACPGRDAARRDAAGALVHLLRAGVDDAALVARFRYRPLPNAR  
IPQFDFTEEPTP

>C2U31\_19705|KEGG|CYP1199C1|[Achromobacter sp.]achr|BP

MYEMDNRTIHYHKEIRRLFDDPSQRGVFRIDEQTVGVTDGPLSKAILAARPMYDFERIVF  
KPILGQPIAKATFSAVMRAVGQDARRVAESPPEPGPRLAGRWPDAGYLYLQQRLYASDPW  
PIYALTHRNVANRTGWLKPLVDGLSSRLMTRLLHRCAPIHSSALAQLVNEAPDAHERRRAV  
TLYRRTARSMCITVACLVTNALWLASARDARERPRDCITETLRLMPPAWMYHRNACQEFT  
AVDARIRETDDVLVIPLITQRDPRHWPDA DAYEPDRWLGVSNPEASDH YLPFGHSHDRCW  
ARELVLM LAEHTIRQIAMQDHWTD SRQTSVQVPLKSLLCPTRVNVVAV

>C2U31\_30205|KEGG|CYP1110A3|[Achromobacter sp.]achr|BP

MRPTDIPDLKSAAFLADRYPTYRRLQSDFPHF EIDINGEDCIVLTRYSDVDEVLRNPLAT  
VQQAPGVFPERIGNGAGARFYRESLPNIDAPDHTRIRRI VTPAFNPRTVANMRGWVEKVI  
VEHLDRLEGQDEIDFVSAFADPVP AEIACRLLHVPLSDARELFARQHGLNAVLSVSDITP  
ERLAEADASA AFYYEYMDDVLDTLRGKLPEDDFVGALMAAEGGDNGLTRSELVTTLIGFL  
VASYHTTKVAMTNAVLALLSHDGERARLMAQPD LARNAWEESLRYDSPVHFIHRYASETL  
TVGGRDIARGKRLLLGLHAASRDEARFPQADRYQIDRPDNRHLAFAGGGHFC LGSQLSRL  
EGDVLLRTIFQRFPGMRLTETRFRV PDLTFPMLLRMTVALRAPQG

>C2U31\_20070|KEGG|CYP2308A1|[Achromobacter sp.]achr|BP

MNDMRFNPFKDFSAAPYAHYRDLREQDPVHRSAMGIWVLTRYAE  
VSQVLRDPSYSSEVSRWPGFAQRYRSRPGVAWLLTHSVLNRDEPDHKPLRRAI IQAFSP  
ASEGRLARMIDDILDQRLNALDGDQDFDAVGDFALPVPVSTVCRVFDVASADQARVKAW  
SNQVASLIEPLPAAPVLGDAAAGIAAFKEYLREKMECPEDAGLAGDLMRSMQEHVPVGL  
DALANLVLMFPAGHETTVNLIGNLLLLLRHPEQRLLREQPDLPKAIIEILRVESPO  
QIAWRVATQDHELAKRIAAGDQLMLVLGAANRDPEVFEDPERFDITRTNNRHVAFGLG  
RHACLGWGFARMQGRALQAIVARFPRLSLAGAPLWHPTVSFHGLRHLPVTQTPAFPNG  
GQQ

>DVB37\_24515|KEGG|CYP116B73|[Achromobacter sp.]achb|BP

MSQSPSSSRPSGCPIDHAALAMQSPTGCPVSSRAAEFDPFGDGYQQDPPEYVRWAREQE  
PVFYSPKLGWVWTRYEDIKAI FRDNITFSPSIALEKITPTGPEANAVLESYGYAMNRTL  
VNEDEPAHMPRRRVLMDFPTPEELKHHEPMVRRLTREYVDRFINDGRADLVDQMLWEVPL  
TVALHFLGVPEEDMELLRQYSIAHTVNTWGRPKPEEQVAVAHAVGNFWQLAGKILDKMRQ  
DPSGPGWMQYGLRKQQTHPEVVTDSYLHSMMA GIVAAHETTANASANA I KLLLQHPDAW  
REICEDPDLIPNAVEECLRHNGSVAAWRRLATRDAE IAGVPI PAGSKLLIVTSSANHDEG  
QFNDADLFDIRRENASDQLTFGYGSHQCMGKNLARMEMQIFLEELTRRLPHMKLSDAQFT  
YVPNTSFRGP EHLWVEWDPKQNP ELASPELLNDQHPVRIGEPSSHAI TRPVVVQSAVEAA  
DGILRLRLVSPDGKPLPRWTPGSHIDVECGDTGLSRQYSLCGDPSEAGVFEI AVLKETEG  
RGGSAMMHANAVVGARLRIRGPRNHFRMNEAADKLIL IAGGIGITPISAMARRAKELGLD  
YQLHYSGRARTCMAMLDELVALHGDR LHVHVKDEGTRADYAALLSQPDAGTQIYACGPQG  
LLDGLAACCAAWPEDALRVEHFHSTLGTLDPSKEQPFEVVLKDSGIVINVPADQTL LTAL  
RGANIDVQSDCEEGLCGSCEVRVLEGQIDHRDVVLTRAERDANNKMMACCSRSCGGGKV  
VLEL

>HLG70\_25295|KEGG|CYP116B298|[Achromobacter deleyi]ady|BP

MSQAPTSRPSGCPIDHAALSAAQGPTGCPVSARAAEFDPFGDGYQQDPPEYVRWARDQE  
PVFYSPKLGWVWTRYEDIKAI FRDNITFSPSIALEKITPTGPEANAVLESYGYAMNRTL

VNEDEPAHMPRRRVLMDFPTPEELKHHEPMVRRLTREYVDRFVNDGRADLVDQMLWEVPL  
TVALHFLGVPEEDMDLLRQYSIAHTVNTWGRPKPEEQVAVAHAVGNFWQLAGKILDKMRQ  
DPSGPGWMQYGLRKQQTHPEVVTD SYLHSM MMAGIVAAHETTANASANA I K L L L Q H P D A W  
REICEDPD L I P N A V E E C L R H N G S V A A W R R L A T R D V E I A G I A I P A G S K L L I V T S S A N H D E G  
QFADADLFDIRRENASDQLTFGYGSHQCMGKNLARMEMQIFLEELTRRLPHLKLSEQSFT  
YVPNTSFRGP EHLWVQWDPQRNPERADPALLDGQHPVRIGEPSSHAITRPVVVQSAVLAA  
DGILRLRLASPDGKPLPRWTPGSHIDVECGDTGLSRQYSLCGDPAEAGVFEIAVLKETDG  
RGGSAWMHEHALPGARLRIRGPRNHFR LNEAAGKLIL IAGGIGITPISAMARRARELG LD  
YQLHYSGRSRRSMALLDELAQLHGARLHLHIKDEGRRADYTALLAAPEAGTQIYACGPQN  
LLDALAGCCA AWPEDTLRVEHFHSTLGTLDPTKEQAFEAVLKDSGIVITVPAGQ T L L T A L  
RGANIDVQSDCEEGLCGSCEVRVLEGDIDHRDVVLTRAEREANTKMMACCSRACGGKKIV  
LEL

>PT7\_0379|KEGG|CYP289A16|[Pusillimonas sp.]put|BP

MHTACPHIHDWNPRDERVQQNQIAAYDTMRKQCPVARSEYLHWSVFKHAEVVRI LNDHDT  
FSNQVSPRASVPNGMDPPEHTPFRQLIEPYFDPSAMADFKPACESIARNLAENLHQGQID  
IMSQLAHPYALEVQCAFMGW PATLHQPLRDWMRKNHKATLAKDRAAMDQIAQEFDGYMLA  
LINERRQAGANAPDDTTTRLTRGHVDGRPLNDEELISILRNWTVGELGTIAASVGILAHY  
LAAHPALQEQLRKQPELLPPAIDEILRIHAPLIANRRITTRPVELGGRHLDAGERVSILW  
ASANRDEAVFGDPDDFRLDRDPLLNLLYGAGIHVCPGAPLARMELRLMEALLACTQRLD  
LTSGQPPIRARYPGGGFTSLILQVL

>PT7\_2686|KEGG|CYP1183A1|[Pusillimonas sp.]put|BP

MNTTTRSVD DYSFMDPDVQDNPF EFYELLQQERP VYQMPETGFFV VTRYEDVRKVVADFK  
TFSNDLVREKEFQKEKYAIHSGVLAERG WPLMQTLQRTDPPVHGRYRRLLDKVFTPKQVQ  
QLKPRIDDIVNHLIDDFIDKGECEFVHDFALMLPGLLIAEQIGLDDDVLT FKKWVDAMFA  
TGMNILSEDEIRKAAEIELEAQLYFAKIFEDRRKNPRDDIVSNLVHASVGEDEAPLSTQE  
LQSLMRHIVGAGFESTASALASGMLRLINHPDQLKKLKS DRS LMPGFVEEVLRIDSPVQG  
HFRKAMKDVTIGDVHIPAGSIVI PRYGAANHDPEQFQCPHAFDIERKNANRH LAFGMGTH  
FCLGANLARQEISSAFSTILDRMDEIKLARPLVRPIHQVNFI LYLLNELPITFVKRNTQP  
NQG



>CKA81\_16930|KEGG|CYP1157D3|[Pusillimonas thiosulfatoxidans]pus|BP

MTDHMPDDLSAIDRDLRAYTDELPRRHGVVRNIQGEWVLLRHDLVVQAAQDHDRFSNAVS  
SHLQVPNGIDAAEHTAYREALDDFLSPAALAPFVKAFRQVASDLVASLPRNVPVDAVSEF  
GVRFAVRAQSAWLSWPTELEDRLVDWVAQNHAATRSGDRSRMRQVAQAFDDLVRSVMLPR  
RGVESKHDLNDVTARLMRTEVNGRPLSDAEIVSILRNWTGGDLGSIAQCIGVLLHCLATR  
PFLQDHLRNGVPAAEFDAIIDEILRVDDPFISNRRVTTCPVTIGGVDLPQGARVKLNWTS  
ANRDEAVFGDPDAMEPDRNAEHNLVYGIGKHVCPGRHLATLEMRIALQELLAATLSVALG  
PQHQAQRAVSPVGGWAKLAIVLT

>G9Q38\_04420|KEGG|CYP199V2|[Pusillimonas sp.]pud|BP

MVSLATFTKDAVPVTDPDFYAEVFLIDPYPYEQLEAGPVVLLERYGAYALGRHDEVHA  
VLSDAHTFCSGAGVGLTNFNTEKPKPSIILEADPPHHARTRKVVARVLSPASIGRLRE  
TFEAEADALVDKIIQMGQFDDAKDFSEAYPLKVFADAVGLPAEGRENLLPYGDMVFNGFG  
PMNERFTSRLAKAEESVKWINNVCQRENLT PNGLGADLYKAADAGEITHEEAGMLVRTLL  
SAGLDTTVFTLCNAMLCFAKYPDQYEVLREN PQLARQAIEEVIRFEPTFHSFYRTTTKPV  
EVAGVEMDANQKICVFVGSANRDP RRWSDPKFDVSRKATGHIGFGTGIHGCAGQMMARL  
EGDILLRAFAKKVRSIELMGE PVRHYNN TVRGFKQIPARVVAL

>G9Q38\_04600|KEGG|CYP199A38|[Pusillimonas sp.]pud|BP

MTTSTSTTTTPDSVPRLDIDPFGDDFLTMPYPYHEQMREAGEAVWLDSYGLWAFTRYEQV  
KAGLSDWENFISSAGVGLANFRVEKPFRRPSLILEADPPDHTKARAILSRILSPKVQQI  
RGDFQEKAEVFLIDRLLEQGEIDAVNDLAKVYPLQVFPDALGLAEDEREILLLYGDMVFNS  
FGPRNHIFQRAVEKYE PVREWIMNKRREELRPGGFGDQIYQAADAGEITLEEAPMLVRS  
FLSAGVDTTVNGIGNAIYCFAQFPEQYDKLAAEPKRARP AFEETLRFESSVQTFRTVNR  
DVEFAGAPMKENDKVLFFLAAANRDP RKWENPDVFDIDRKATGHMAFGTGIHGCVGQAIA

RLEGELILTALANKVKRIEQIGEPTRRLNNTLRALDSLPVRLVPR

>TKWG\_13525|KEGG|CYP116B8|[Advenella kashmirensis]aka|BP

MNTQSTSQPTQAQCPYSGAHTNAGTGCPVSARAAQFDPFEDAYQQDPPEYVKWSREQEPV  
FYSPKLGYWVVTRYEDIKQIFRDNITFSPSIALEKITPTGPEANAVLESYNYGMSRTLNV  
EDEPAHMPRRRLMEPFTVDALKHHEPMVRALTRQYVDRFINDGKADLVEQMLWEVPLTV  
ALHFLGVPEEDMDTLRKYSIAHTVNTWGRPKAEEQVAVAHAVGNFWQLAGKILEKMRKNP  
EQPGWMQYGIRMQQQLHPDVVPDSYLHSMMAGIVAAHETTANASANAIKLLLSPHVVWQE  
ICEDPNLIPNAVEECLRHNGSVAAWRRLATRDVQIGGVSIAGSKLLIVSSSANHDERHF  
ADADLLDIRRENASDQLTFGYGSHQCMGKNLARMEMQIFLEELTLRLPHLILSEQTFTYV  
SNTSFRGPEHLWVHWDP SANPERQDPSILNRQHPIRLGEPSTHSLSRQVVVQETEMLTDD  
IMRIRLAAADGQTLPRWAPGSHIDLVCGLGISRQYSLCGDPANPQVMDIAVLREDAGRG  
GSAWVHQHVRSGLPLHIRGPRNHFFHFEQASKAIFIAGGIGITPIIAMARVAKNRGIDYQ  
IHYCGRSRKSMALLASLQEHGERLHVYAADEGLRADFASLLATPDAETQIYACGPQRLTD  
CLQELCECWPDDALHIEHFHSTLSKLDPSREHAFAELKQSGITVTVAANQTLLEALRAA  
NIDIQSDCEEGLCGSCEVSVLGGQPDHRDVVLTRSERAAGNKMMSCCSRAKDKHIILDL

>BN940\_07996|KEGG|CYP289A15|[Castellaniella defragrans]cdn|BP

MNTPQDWDPRAPEVLADPIAAYDRMRRRCPPVAHSDYLHHSVFRHADVMRILLDHETFSSQ  
ASRHVSVPNSMDPPEHTAYRRLIEPYFAPERMAAFEPACRRLCAELVAALPRNERVEIMF  
GLAHPFALRMQCAFLGWPDSLHEPLRQWIHKKNVATLSGDAHAIAAVATEFDETIRALLK  
VRRDAGDQAPDDATTRLLRET VNGRPLAEDEIVSILRNWTVGELGTMASSVGIIAHYLAS  
HPDLQDRLRSQPELVRPANDEILRIHAPLIANRRATTCPVRLGGTQIPAGERVTLIWASA  
NRDEAVFGDPDEFRLDRDPSLNLLYGAGIHACPGAPLARLEIEAMIQALLAGTRALEPVA  
EQPPMPAIYPASGYRQAMLQLRHD

>AFA\_04380|KEGG|CYP1319A1|[Alcaligenes faecalis]afq|BP

MFGDFNLASPYPAYARLRQGPPLVWDADFCGGAWLVHRHGDVQAALRHPDLSVRRVGGWV  
SQAGAHPSRLQTFKGLMARTLVFLDRPRHTRVRRVVNAAFSAKALDTLHGTTIEKRVAQI

HLGLENKLQHGSADLVDEVCRPLPALVMMDLGLQQLPLSVFQAWSEQLARFIGQATPDQ  
PLLMDTQDALLDMADFLGNSANLQEGGLAWRLHDEQLSLQGRRERLAQSCMLLFAGYET  
SRHLLSSSLFQTLLDDCTKQDLLSNPQKIPAAIKEVLRHDSPIQYTARRLMQDQHWGQH  
LRKGQLLLLLLLGAANRDPEIFAHPDELDFNRNNQAELSMGHGIHHCLGAGLVQLEARLTL  
EQFLPLLPRQLQLGQGERIQLPAYRGWNRLSVQYRALLS

>D3M96\_05490|KEGG|CYP1319A1|[Alcaligenes aquatilis]aaqu|BP

MFGDFNLVSPYPAYARLRQGPPLVWDADFCGGAWLVHRHSDVQAALRHPDLSVRRVGGWV  
SQAGANPSPRLQTFKGLMARTLVFLDRPRHTRVRRVVNAAFSAKALDTLHGTIEKHVAQI  
HLSLENKLQHGSADLVDEVCRPLPALVMMDLGLAQLPLSVFQAWSEQLARFIGQATPDL  
PLLMDTQDALLELADFLGNSANLQEGGLAWRLHDEQLSLQGRRERLAQSCMLLFAGYET  
SRHLLSSSLFQTLLDDCIKQDLLSNPQKIPAAIKEVLRHDSPIQYTARRLMQDQHWGQY  
LRKGQLLLLLLLGAANRDPEVFAHPDELDFNRNNQAELSMGHGIHHCLGAGLVQLEARLTL  
EQFLPLLPRQLQLGQGERIQLPAYRGWNRLSVQYRALPS

>FE795\_04400|KEGG|CYP1319A1|CYP1319A1|[Alcaligenes ammonioxydans]aamm|BP

MFGDFNLASPYAAYARLRQGPPLVWDANFCGGAWLVHRHQDVQAALRHPDLSVRRVGGWV  
SQAGAPPSRLQAFKGLMARTLVFLDRPRHTRVRRVVNAAFSPQALRDIRSIENRVTHL  
HSAFTNQLRHG PADLVEQVCRPLPALVMIDLGLQQLPLAVFQSWSEQLARFIGQATPDL  
PLLMDTQDALLDMADFLGNSAKLQEGGLAWRLHDEQLSLQGRRERLAQSCMLLFAGYET  
SRHLLSSSLFQTLLDDASKLQDLLLLNPQKIPAAIKELLYDSPIQYTARRLMQDQHWGQH  
LRKGQLLLLLLLGAANRDPEVFSHPDDLDFSRNNQAELSMGYGIHHCLGAGLVQLEAKLVL  
EQFLPLLPRQLQLAQ RERIQLPAYRGWNRLLVHYRAMPS

>ODI\_R0617|KEGG|CYP1962A1|[Orrella dioscoreae]odi|BP

MSAGLLLAEEHAAPAGPAPGQAVPRRDDAAILTPLFQDDLIARERDGVRLRYKALTRDRP  
LFRDANGSWVVSSEFQGC AVLSDPAYVAQPPLPAEEAAVYAPILATMLLRDGDAAHALRR

HFAPLFKTQRM DRLHAFMDQDIATCVAALPASAFDAGASLAHHLPARMACVLMGLAPEHA  
PRLVALTAPVLR LISGTPLPPT SMLALLQASRV AIQALATLMARQAPATLHYLDIDPHAL  
ATHALSDGTEHASCASNLC LLFVAAYTTSMLS LGNTLALATQRPGLWTQMAQE PSRI PRT  
VAELGRLAPAAQALQRYAAHDLTLGDVPLRAGEPVVVMVAAANRDPRAFEHPDEVDLGRH  
ARTLTFGAGPHGCVGVGLARRQLGGLLAALTSRYPRLAPLARPSRGLQIGTFLGYDRLWL  
GVPAESAKAPAPVRQPNA

>DBV39\_09585|KEGG|CYP152E6|[Orrella marina]boz|BP

MLKTPSDKTL DSTLPFARDGYLFVTKRC DRYRTDLFQTR LLLRKSICMRGEDAARLFYDE  
GRFERSGVAPVRVQETLFGRGGVQGS DGAHRWRKEMFLSLMSAQ AISRLGELSAMQWRA  
YAAKWEEQE QIVLLDEACEILCRAVCEWAGVPLAELEVTKRARDFAAMIDAGAAIGLRHW  
RGRWARNRAEKWIGGIVEDVRNHRLAPDEGSALHMIAFHRDRQGQLLNERIAA VELINVL  
RPTVAVAWYVTFAALALHQYPECRQRIAAAQEGYLECFVQEVRRFY PFFPVVAARTRHEF  
EWKGYRLPGRTRVLLDLYGTDH DTRLWDRPDAFVPERFRHWDGSAFNFI PQGGGSHRNGH  
RCPGEWITIELMKVAAEFLSARIQYEV PQQDLRISLSRIPALPNSRFLIRNV RQI

>I6G29\_02045|KEGG|CYP289A28|[Oligella ureolytica]oue|BP

MSNNEKLSDDVYQASISSEPIAAYDKIRRACPVKHDSHLHWALFKHADVLSVINDHDTFS  
SVVSKHVSVPNGMDPPEHTVYRQLIDPYFNEERMAAFEHSCQKIADTLVQNAPKNTEFDL  
IEHFARVYAVQVQCAFLGWPESLQEPLTQWVRKNHRATLAQDRPAMSEIALEFDGFIREL  
LNTRRADGQDAPDDLTTALMQETVDGQVLADEIIVSILRNWTVGELGTIAACVGIVVKYL  
ADHPELQQKLREQPALDDSIDEILRIHPPLISNRRVTTKEVSLGGETIGANQRLTILWA  
SANRDEAVFGDPDEFCEPERNGEHNLLYGAGIHYCPGAPLARLVLR LVIGALLRDTQGFL  
SPNHEAVHAKYPAGGFDLLPITLVAGSCCGGCSG

>EGT29\_07245|KEGG|CYP199A34|[Pigmentiphaga sp.]pig|BP

MTDIAANIPVVDFDPFSDAFLTDPYDYHRRMRDAGPVVHIPKYGILAVARHAEVHGVLND  
WQTFISSAGVGLANFRTEKPFPRPPSLILEADPPQHTRSRTVLGRILSPKTVQQIRAQFQE  
VAEALIDRLLEQGTIDGVKELGEAYPLKVFPDAVGLTEDGRENLLAYGDMVFNAGPRNQ  
LLINAAKRVEPLTDWIMTNCQRQNLRPGGFGDQIYQAVETGELTETEAPMLVRSFLSAGV  
DTTVNGIGNALWCLANHPDQWDKLHANPALARQAFEESLRFEAAVQTFRTAGRDCELAG  
VPIRSDTKMLTFLASANRDPRQWQNPDPVFDIERRATGHMTFGSGLHGCVGQVVARLEGEL  
ILSTLARRVRRIEPLGPPTRRLLNNTLRALASLPLKLHAA

>EGT29\_08175|KEGG|CYP1108A5|[Pigmentiphaga sp.]pig|BP

MPTPPPDWDPLAPARHGDPAEVYGGLREKCPVAWSDRFDGFYAISRFDVVKAALDVETY  
SSAKATIPDNAGPDRPPRAPVEVDPPVHGDFRDVLNRFFTPDRIRLLEPVIRRTARSLLG  
RCIALGETDVVANFTFYMPIQVQCTFLGISPDDGERIKNTINRIIHAGAVGDASEHKKS  
DEIYAYIESIIDARRRTPYDPNDVISALIEKVGGRITLDADIAGVIRLFLQAGHGTTTH  
ALGSIIRYVGTVPADQKRLREKPGILPQAIEEILRVWSPVRAVGRKTTCDVEVAGRILPK  
GSKVGLMIASANRDPEAFEDADRVDVDRKPNRHIALGYGIHRCVGAALARAQLRVALEEL  
LSMTDDVVVTGEPEFSSWSHNGPSKLMVRLKPATQAAGAPVIRAGHKELSMVGGIRPVA  
TDVIELELRPSSGMELPEWTPGAHIDLVLPGDLRRSYSLVGAPADRSCWRIAVLREATGR  
GGSDAIHRMKTGDTMRVRWPTNNFVLRAAPNYHFFASGIGITPILSMAQAARAQGTFFRL  
DYIGRSRERLAYLDRVSGLDVHCHFTSESGRPELGELLGRDPSAPVYACGSQDFLLAL  
EAAATALGRSFHTEWFAPRPGARQAGDGALEAFTVRLERSNVEVGVLPQSIIDACAEAG  
VSIPASCFEGTCGSCLSTVLEGVPDHRDSFLSPNERKSNRLMAACVSKSMTAKLVLDW

>EGT29\_25055|KEGG|CYP116B100|[Pigmentiphaga sp.]pig|BP

MSAPPPRAGGCPIHHDAASAGVGPTGCPVSARAAGFDPFEDGYQQDPPEYVRWAREQEPI  
FYSPRLGYWVVTRYEAIKAIIFRDNITFSPSIALEKITPTGPEANAVLEQYGYAMNRTLNV  
EDEPAHMPRRRLMEPFTPEHLKHHEPMVRRRLAREYVDRFVDDGRADLVDQMLWEVPLTV  
ALHFLGVPEEDMDTLRRYSIAHTVNTWGRPEPEEQVAVAHAVGNFWQYAGKVLEKMRQAP  
DQPGWMRYGIRKQQEHPEVVTDSYLHSMMAGIVAAHETTANATANAIKLLLQHPDAWRE  
ICEDPGLIPSAVEECLRHNGSVAAWRRLVTRDTRIEGVDIPAGSKLLIVTSSANHDDRHF

ADADFFDIRRENASDHLTFGYGSHQCMGKNLARMEMQIFLQELTRRLPHMRLADQRFYSYV  
PNTSFRGPEHLWVEWDPARNPERQDATLLQIQPPVRIGEPSRHAIARSVVVESATPVADG  
IVKLRLVSPDGRALPRWAPGSHIDVECGEPERSRQYSLCGDPADAGALEIAVLHEPEGRG  
GSSWIHGRVRVGDKLRI R GPRNHFR LDETA EK LILVAGGIGITPIAAMARRARELGMDYE  
LHYSGRSRAGMAFLDELATLHGERLHVYVSEEGQRNDLAALLGQPREGWKICACGPKRML  
QALEAHCAAWPDDALRIEHFESNLAQLDPAREHAFEVELKDSGITVTVVPADRTVLA SLRA  
ANIDVPSDCEEGLCGSCEVRVL AGQVDHRDMVLTKAEREANDRMMTCCSRACAGKLVLEL

>LSG25\_13615|KEGG|CYP116B301|[Paralcaligenes sp.]park|BP

MTNAIHKKLPSACPIAHVAGAVPKPSTGCPISQHAADFDPFQDAYMENPSEFIRWAREKE  
PVFYSPKLDYWVVTRYQAIKNIFRDPITFSPSNVLEPIEPLSNEAAAILKHYGYAMNRTL  
VNEDEPAHMARRRVLMAFFTPEHLKQHEPMVRRVLVTEAIDQFMDEGHVDLFQKLLWDVFPF  
SVALHFLGIDDDSDREKMHFRFSIAHTVNAFGRPTPEERESVAHTVGQFWQLAGEVLEKMK  
RTPDGP GWMRYSIRQQKDYPDVVTD SYLHSMMAIIVA AHETTSFASANA I KMLLEHPEA  
WQDLCADPGLISPAVEECLRHSGS IASWRRKVMSDVEIEGVRI PAGSKLLL VVASANHDN  
KQFSDPDFFDIRDNTVEHLTFGFGAHQCLGKNIGRMEMQIIIGELTRRLPHMRLAQQSY  
KYVHNLSFRGPRNLLVEWDPNLNPERLDSVALQQVQPVRLGAPLAKNMVRKLVVESAEKV  
APDTVLLRLASPTGSPLPNWTPGAHL DVECGDTGLSRQYSLCGDLENRETWQIAVQRDPN  
SRGGS AWIHDYAKPGATLRIRGPRNHFRMSEASTDRIVLIAGGIGITPIMAMAQHAQSLG  
IDYEIHFSGRSRAALPLIENLQRRHGVRLRLYISEEGHRNNFRELLAQPNATTQIYACGP  
SRMLDDLQNVLVQQGWPDRLHVEHFINTANRLDPDREMAFEVELRNSGLTLQVPANKTL  
LEVLRASNIDVQSDCEEGLCGACEVGVVSGEIDHRDSVLSLTEKQKSTRLMACCSRGLSK  
PLVLDL

>LSG25\_18200|KEGG|CYP107DG11|[Paralcaligenes sp.]park|BP

MINREFLNDPYPAYRALHAAGPLHWNREFCGGAWLLVRHADVASVLRDPRFSVRRAGGWV  
NSSGLEARNELRAFKRIFARSILFLDAPRHARLRQIMSAGFKPAALQALIPQIQAIADGL  
LDQIIAGVQSGETETQGSFETTQFDFMHDFARPLPALVIAAMLGIDAADRND FVAWSDDI  
AGFIGSPTPSIETARRAQAGLMAMSDYFRGLLAQRR LQPRNDLISQLIVAEADGGIATSK  
ELLAQCCTLLFAGHETTRNLLGNGMLALLAHPRQWQLLQQTPSLLPSALKELLRFDSPVQ  
YTGRRLKVDVEMHGRLMKKGELVIPLIGAANRDPAKFSAPDRLDITRNEGSHLSFGYGPH

VCLGATLTYLEAEIALRSVMRRLPKLRLAGDVQSWGLNAVYRSLNQLPLRFECRSKTQAS  
QEQVSHA

>Rfer\_0298|KEGG|CYP203A5|[Rhodoferax ferrireducens]rfr|BP

MFSFDPYAPAVDANPFFFYKTLRDEHPCFWSPEADMWILSRADIVSAGQDAQTYSSASG  
NLMTELPGRAGATLGTTDAPRHDRLRGLIQHAFMKRNLESLSEPIRDIAREVAESLRGKK  
QFDFISEFSSKFTVRVLFAALGLPTGA EVTVP ESTVRDKAVMMVQSDPVTRTKGPEHIAA  
YNWMQDYAAGVIAERRASPRNDLISHFSMAEIDGDKLDEREVLLTTTTLIMAGIESLGGF  
MAMFALNMADFADARRQCVANPALLADAVEESLRFNTSAQRFRRRLMKDVTLHGQTMKAG  
DFVCLAYGSGNRDERQYPNPDAYDITRKPRGHLGFGGGVHACLGTAIARLAVKIAFDEFH  
KVVPEYHRVQEQLPWMPSSSTFRSPLVLELAVV

>Rfer\_4141|KEGG|CYP289A18|[Rhodoferax ferrireducens]rfr|BP

MSNMRS PDWDPKSAAVLRDQRAACDEMRERCPVAYS DLLGWSLFRHEDVVRVLNDPDTFS  
NVVSRNLSVPNGMDPPEHGQYRRIERYFAPQTMQAFEPQCSSIAADLVRSLRGRVALEL  
MGDFAHPFAVRVQCAFLGWPASMHEPLRLWAQKNHVATLAQDRPAMADIAHEFSGYVLGL  
LQPRRDAGIQGHQDVISSLTSQQIKGRPLNDEEII SILRNWTVGEISTIAAAGVVAQYL  
AEHTELQQQLRTQPTLLPDAIEEILRMYGPLLANRRVTTRTVEIGGRTINAGERISLNWV  
AANRDGLVFTDPQSFRLDRDASANLLYGAGIHVCPGAPLARMELRVAVRALLDGTTSIDP  
IAQRPPTS AVYPASGFATLPLHLTFPSQPSTHQR

>EUB48\_06975|KEGG|CYP289A27|[Rhodoferax sediminis]rhf|BP

MNDERKCDWDPRSEAVMRDQRAAYDEMRERCPVAYSEFMQWSLFRHEDVSRVLHDHKTF  
NAVSRHLSVPNGMDPPEHTKYRRIVESYFTVQRM DAFEPVCRQLVAELVRDVLARGEVEL  
MADFALPFAVRVQCAFLGWPPMLRERLVRWTRKNYEATLAQDLQAMSEIAREFEGFIDGM

LETRMQAGVRPEDDVIGALTHEKVGWRPLTNEEIASILRNWTVGEIGTISASVGILIHYL  
SQHVELQQRLRTQPLLLPAAIDEILRIHGPLVASRRVATRKVEIGGRKIDAGERISLNWV  
SANRDGRVFEDPQAFRLDRDPAANLLYGAGIHVCPGAPLARMEMRVCLEQLLERTRIQD  
APGKAPSLAVYPASGFATLPLQVR

>EUB48\_07025|KEGG|CYP195A28|[Rhodoferax sediminis]rhf|BP

MSSGIPSMIITPAMTPERARKIADTFDLRALPPDFYANPYPVYAALREHEPARRMPDGSY  
FLTRYADLVAVYRDAQTFSSDKKAEFGPKYGQASPLFEHHTTSLVFNDPPLHTRVRQLIM  
GALTRRAIDSMEAGLVTLVDGLLDRIEAQGGGDLVGDFAAAI PVEI I GNLLGVPHADRGP  
LRGWSLAILGALEPALTPEQEALGNRSVSEFGAYLKNLVAERRRHGPGDPEHDVLTRLIHG  
DGSDTHEARAGSEPLSETELLQNCIFILNAGHETTTNLIGNALVALQEWPDAXHRLLSKM  
KLSAQNPQGLEADLTAVDEFRLFESSNQLGNRRALKACSVGGIQLEAGTLITLGIGAAN  
RDPAQFADPDVLNLARGNGRHGAPGSKHLAFGVGIHQ CAGLSLARLEGRI AISRFLQRFP  
DYRLTQMPTRGGRARFRGFLHAPFASA

>EUB48\_13810|KEGG|CYP1097A17|[Rhodoferax sediminis]rhf|BP

MEPDTRRTPASGAPPPALRRLDELPGPRGLPVLGNALQIRPARMHQQFEAWSKTYGPLFR  
VQLGRRKFLVMADHELMGAALRERPERFRPRLGGRITREMGFDEGLFFANDDVWRRQRR  
MVMAGLDPGHIKAYFPSLLKVTRRLQARWQTAARSGATIDLQADLMRFTVDAIAGLAFGA  
DVNTLSSDEDVIQQHLNKIFPALFKRTL SMLPYWRYLR L PADRALDRSVAEVKAAIRGFI  
AQARDRIRADPSLREHPGNLLEAMINAADAGGSSMNDHDVAGNVLVMLLAGEDTTANTLA  
WMIHLLHRNPPALQRAGEEVRRIAGEPSQFTPERMAQLDYLEACAHETMRLKPVAPLLAV  
QAVRATTLADVEIPTDTVLGLMRHDSLLDRHFPHPTAFLPERWLGDGGPAQVASSAKRV  
SMPFGAGPRVCPGRYLALLEIKMAAAMLLSSFDIDSVDSSSGTDVPEKLAFSGMPVGLRM  
RLRERR

>EXZ61\_03070|KEGG|CYP212B5|[Rhodoferax sediminis]rhg|BP



MNPASTSSPSISAQTSALTRPPGPPSRWWGLPLLAAMKRDYLGFTTQLQRDHGDISYMRL  
GHERAYDLMSPDLVREALVSHADALIRWERGIEVFAQVFGQSVLVTEGPVWQRQRRMLMA  
AFMPKQVAGYATLMTSAAQDAFAQLIIPPGQTSARIPMDALWSSVAMDVILRTLFSRSAQA  
DSQAAIAATQALSAAAFQEMFLPFSLPDWLPLPGKAAKRRAIRSLRQLIQRHINERHAEL  
AAHPDAPAATDLLGRLLALRDETTGEALSAQEVFDQCMVSFQAGHETSATALLWWSRLMA  
EHPDLAQRAHDEVATVLAGQTPGPEHMAQLPWLATLKEAMRLYPPVAAIMSRRTTAPIT  
VGGWQIPQGAMLRITPWLLHHDERWFANPEQFQPARFLDGAPAI PKGAWMPFGAGPRVCL  
GQHFAMMEMTLLAAMLLQRYRLRLPADAAPSTPELVTLRPRAPMELMLSHL

>Bpro\_1581|KEGG|CYP107DG2|[Polaromonas sp.]pol|BP

MNADLRPPAPAYPIIDAAFLANPYPTYDALREAGAIHWSEEFFGGAWLVTRHADVELVLR  
DPRFSAQRTGAWVKDREETSGELSGFQQLFARALLFLDAPDHPRIRKVLHAGFRMDVLQR  
LVPHIEQAVTELLDQEGEGADCFDFIETVARPLPVRVITRLLGIENLQYDDFMAWSEDLAS  
FIGAPQPTRGQARRAQVSLAMSRYFETLLEQKRQTPGDDLTSLAQAEARGEIQGGAE  
LAQCAMLLFAGFETTRHLLGSGLQALLAHPDQWQRLQQAPELLPGAVRELLRFDSPVQYT  
GRRVSTDVLVHGGQLRRGDLVVPLIGAANRDPRRYAQPDVLDITRRDGSSLSFGSGPHVC  
IGAALTLMEAEIVFQQLLRWPELS LVDATPRRITNPLYRGLVTLPLRCRAPA

>Bpro\_2807|KEGG|CYP1180A1|[Polaromonas sp.]pol|BP

MSDGVLPQPGNPIEAVTHVDPYPYRQLREQRPLYFDEGLKLWVASSHSVIDEAFHNVAL  
RVRPPAEVPVQALLGTAAGEVFAQLVRMTDGEFHAVHKPAVEQAARRWSLADVTRASEAA  
ARDLFAAGPPQGKHGPLGGQRSVGAKFRCLTVNDLMGVLPVQAMARLLGLPDGLDDSCR  
WVRQFVQGIAPGASTQAVALAAGAAEALMDQGRALGLSTVQAANRIAFMQQSLDATAGLM  
GHTVLMLAQYPDLALLADQSPQAMRGFVAEVERHQAPIQNTRRFAADPVVLQAGQSIEAGQ  
GVVLVLASANRDGLLNPRPDQFDPQRGERRSMGFGAGAHACPGAIAIEMVAACIQWMRA  
TSQFDGCFGALAGFWPLANARIPLFASRKEA

>Bpro\_4920|KEGG|CYP1098B1|[Polaromonas sp.]pol|BP

MSHFCPGYPKPREKRSSVWALFRSARNSWIDALYARSYSMQMGEVHLPGVDLYMVNDPAL

VRRLSGQPDQFPKSPLLADALRPLLGDSILTTNGDQWQRQREMMNPFAFAQAKLDVAFPV  
MRAAADDLVERLTEAAQRGSELNIEVELTHVTADIYRTIFSEPLSGDDAHKVFDAFARF  
QALAPKMLPSMYGVRWLWVPWNVWQSRRAASDIRRLLEKLIRSRHEAWLRGDDLGNNDI  
LSALMTSRDRKTGEFFSFDELVDQVAVLFLAGHETSASALTWAVYLLSAVPEVQERVHQE  
TCRVFGQRTPEQRDMKALVLTRNVFRETLLRFPVPGFMARESAQTCPMRDKMVPKGASVM  
ISPWLIHRHRERWSDPDAFNPD RFDD DASRESIRQSYLPFGMGPRVCLGA AFALQEATLI  
LASLIRAFRLETVTGHTPMPVGRLTIRSDNGVRLRIFKREDQ

>Bpro\_5301|KEGG|CYP153A76|[Polaromonas sp.]pol|BP  
MSEAIVVNNQNDQSRAYAIPLEDIDVSNPELFRDNTMWGYFERLRREDPVHYCKDSLFGP  
YWSVTKFKDIMQVETHPEIFSSEGNITIMESNAAVTLPMFIAMDPKHDVQRMASPIVA  
PENLAKLEGLIRERTGRALDGLPINETF DWVKLV SINLTTQMLATLFD FWPEDRAKLTRW  
SDVATALVGTGIIDSEEQRMEELKGC VQYMTRLWNERVNVPPGNDLIS MMAHTESMRNMT  
PEEFLGNLILLIVGGNDTTRNSMTGGVLALNENPDEYRKLCANPALIASMVPEIVRWQTP  
LAHMRRTALQDTELGGKSIRKGDKVIMWYVSGNRDPEAIENPD AFII DRAKPRHHL SFGF  
GIHRCVGNRLAELQLRIVWEELLKRWP NPGQIEVVGAPERVLSPFVKGYESLPVRINA

>Pnap\_4029|KEGG|CYP107DG3|[Polaromonas naphthalenivorans]pna|BP

MNAVLTPPAGALGRPIVDAAFLADPYPTYRALSEAGPIHWSDEFFGGAWLLTRHADVEKV  
LKDPRFSAQRTGAWVKDREDAPGELSSFQKLFSRALLFLDAPDHTRIRKVLNAGFRPEVI  
RGLAPYIEQAVGELLDRAEAASARNTGNTPFDFMQAVARPLPVRVIARLMGIEASAQDDF  
MVWSDDLATFIGAAQPGREQARRAQASLLAMCRYFEALLPRRRQAPGDDLVSRLVLAEAA  
GEIEGGPELLAQCAMLLFAGHETTRNLLGNGLQALLSHPAQWQKLQQSPELLPGAVRELL  
RYDSPVQYTGRRVTTTELVLHGQLLRGDLVLP LIGAANRDPARYAQPDRLDIARRDGGSM  
SFGSGAHVCIGAATLMEAEIVFGQVLRRWPGLCLAGAAPQWGSNPVYRGLLALPVRNVA  
AC

>DT070\_17790|KEGG|CYP229M1|[Polaromonas sp.]pos|BP

MAFMTPHAKPETAPEHILAASAHRNPYPYASLVAGPALVFDAPRKLWIAGSAASVKAVL  
GNPACHVRPAAEPVPAAIVGSAAGEVFGLHVRMNEGLRHDAPKLALQRFLAGVDLGRVKA

RTEVLAATQAGQGPLHGSALSrwafEVPVMAVADMLGFAEDELpQVARWMGDFVACLSPV  
STAAQLAASADAASALLARFAELVRDANAHPGSALARLQYEASQVGWRDARALLANAVGL  
LSQTYEATAGLIGNSIVALATQPALLDAMRREPGKLLQMVNEVSRFDPSIHNTRRFVAEA  
TQVAGVSLQPGDVLLVLAAGRDPLCNARPDEFLLDRPDRDVPGFGRGAHQCPGQALAC  
QIAAAVKTLLVSGRLQAASSFSWQYRPSMNARIPVFVD

>DT070\_20855|KEGG|CYP195A26|[Polaromonas sp.]pos|BP

MTDALPFAITPAMPAARAMEIAAGFDLRALPVDFYANPYPVYAALRENEPIRRMPDGSFF  
LTRHADAVAVYRDAQTFSSDKKVEFEPKYGAGSALFEHHTTSLVFNDPPLHTRVRKLIMG  
ALTRRAIADMEPGLVMLVDSLDDAVEAKGGDLIEDFASAI PVEI IGNLLGVPHADRGPL  
RAWSLAILGALEPKLTPEQEALGNQSVRDFTGYLKDLVADRRKHPGDPEHDVLTRLIQGE  
TAGEKLNETELLQNCVFILNAGHETTTNLIGNALVLLQEWPDAGRHLLSKVEQQPNAVIG  
PEADLTVEIDEFLRFEP SNQLSNRRALKACQVGGVDLPEGALLTLCIGAANRDPAQFANP  
ETLDLTRADNRHLAFGFGI HQCAGLSLARLEGRIAVGRFVQRFPDYRLTASPTRGGRARF  
RGFLKAPFAV

>F7R28\_09720|KEGG|CYP195A26|[Polaromonas sp.]poo|BP

MTDALPFAITPAMPAARAMEIAAGFDLRALPVDFYANPYPVYAALRENEPIRRMPDGSFF  
LTRHADAVAVYRDAQTFSSDKKVEFEPKYGAGSALFEHHTTSLVFNDPPLHTRVRKLIMG  
ALTRRAIADMEPGLVMLVDSLDDAVEAKGGDLIEDFASAI PVEI IGNLLGVPHADRGPL  
RAWSLAILGALEPKLTPEQEALGNQSVRDFTGYLKDLVADRRKHPGDPEHDVLTRLIQGE  
TAGEKLNETELLQNCVFILNAGHETTTNLIGNALVLLQEWPDAGRHLLSKVEQQPNAVIG  
PEADLTVEIDEFLRFEP SNQLSNRRALKACQVGGVDLPEGALLTLCIGAANRDPAQFANP  
ETLDLTRADNRHLAFGFGI HQCAGLSLARLEGRIAVGRFVQRFPDYRLTASPTRGGRARF  
RGFLKAPFAV

>F7R28\_12795|KEGG|CYP229M1|[Polaromonas sp.]poo|BP

MAFMTPHAKPETAPEHILAASAHRNPYPYASLVAGPALVFDAPRKLWIAGSAASVKAVL  
GNPACHVRPAAEPVPAAI VGSAAGEVF GHLVRMNEGLRHDAPKLALQRFLAGVDLGRVKA  
RTEVLAATQAGQGPLHGSALSrwafEVPVMAVADMLGFAEDELpQVARWMGDFVACLSPV

STAAQLAASADAASALLARFAELVRDANAHPGSALARLQYEASQVGWRDARALLANAVGL  
LSQTYEATAGLIGNSIVALATQPALLDAMRREP GKLLQMVNEVSRFDPSIHNTRRFVAEA  
TQVAGVSLQPGDVLLVLAAAGRDPLCNARPDEFLLDRPDRDVPGFGRGAHQCPGQALAC  
QIAAAAVKTLLVSGRLQAASSFSWQYRPSMNARIPVFVD

>Ajs\_3072|KEGG|CYP1318A1|[Acidovorax sp.]ajs|BP

MAQGH LAPGPDQGYDL DANDETLPVLQQLRSRYGPICRVPSLTRPGDGLVIHDPDDIRRV  
LLTNRGN YVKGAGLERVRVLLGNGLIVSDGDLWVRQRRMIQPAFQQATRGFAPVVRQVN  
ADLLTRWSAHADSGEPIDLTHELSSVALEIVLRALFSADFRLVETEGGSPFDLLTEESR  
RDLQFAARFRGLARFVRAIIETRRL EARVESDWLSMLMQARDKASGEPMPDRALLDEVMT  
LIVAGHETTASTLNWTWYLLARHPEAEAAALHAAIANAAPTEAAPDQALATPFASADYVEQ  
VLQEALRLYPVWLFSSRAVQDDTLGGYHVPAGTDIFICPYLLHRDAAQWERPEEFLPAR  
FMPDAAAGRHRFAYLPFSAGPRFCVGAGFAMAEMATHLTMVAERFRWVPVDAEPAEAEFQ  
INLRTRHPLRMRLVSRR

>Ajs\_3226|KEGG|CYP289A19|[Acidovorax sp.]ajs|BP

MTTTPPRWDPQAPEVLRDQRAAYDQLRERCPLAHSDAQHWSVLRHAEVMQVLGDHATFSS  
AVSAHPAVPNGYDQPLHTQYRRALDPFFAPERMAHFEPVCRALSAATVQEALALGGELEI  
THEFALPFAVRVQSAFLGWPTLLQDELLGWLRRSQAATRSGDRTQTSAVAQEFEDLVGRV  
RQARLEAPPTQDITSELMHTRVEGRLLDLRELASVLRNWTVGEVGTIAASIGILLHWLAS  
HPDWQQRLRAQPGLLP TAIDEVLRIDGPLVANRRITTRDVTLG GCPVPMGERLSIHWIAA  
NRDPRVFGDPDEFMRDRDPALNLLYGAGIHVCPGAPLARLELRVLMEE LLARTSAIALPA  
GHAPTRATAPDAGYAALRVRLHQTPA

>Dtpsy\_2579|KEGG|CYP289A19|[Acidovorax ebreus]dia|BP

MTTTPPRWDPQAPEVLRDQRAAYDQLRERCPLAHSDAQHWSVLRHAEVMQVLQDHATFSS  
AVSAHPAVPNGYDQPLHTQYRRALDPFFAPERMAHFEPVCRALSAATVQEALALGGELEI  
THEFALPFAVRVQSAFLGWPTLLQDELLGWLRRSQAATRSGDRTQTSAVAQEFEDLVGRV  
RQARLEAPPTQDITSELMHTRVEGRLLDLRELASVLRNWTVGEVGTIAASIGILLHWLAS  
HPDWQQRLRAQPGLLPAAIDEVLRIDGPLVANRRITTRDVTLG GCPVPMGERLSIHWIAA

NRDPRVFGDPDEFMRDRDPTLNLLYGAGIHVCPGAPLARLELRVLMEEELLARTSAIALPA  
GHAPTRATAPDAGYAALRVRLHQTPA

>C380\_19955|KEGG|CYP212B1|[Acidovorax sp.]ack|BP

MRADYLGFTVQLQREHGDLTRMRLGYEDAWDLMHPDLVREALVTHADQLIRWERGMEVFE  
EVFGQSVLVTEGDTWQRQRRMLMPAFTPKRVAGYAQLMTDAARSALDTAVPPGQPGAQVA  
VDALWTDVAMDVILRTLFTSAQADAREAAWATQTLSEAAFHEMFMPFTLPDWLPLPGKA  
AKRRAIRSLKGLVWRHIHARQAEVAAPGAPERSDLLHMLLALRDEQTGEALSAQEVFDQC  
IVSFQAGHETSATLLWWTLLMAQHPEAAQRAQAEVDAVLQGGTPGPEHLAQLPWLGATL  
KEALRLYPPIAALMSRRTTAPITLGGVPVPQGAMLRITPWVLHRDARWFAEPDRFVPERF  
LDGAPPIPRGAWIPFGLGPRVCIGQHFAMLEMTLLAAMLLQRYTVRLPEGGAVGAPRFQV  
TLRPEGTSALWLQRRDAPQGR

>BSY15\_2248|KEGG|CYP212B2|[Acidovorax sp.]acra|BP

MSNSFNTGLLLRCTMHSMHHVTTTVPSKPATPSPSAPLAPNRPLQPGGPPSRWWGLPLLW  
AMRADYLGFSRLQREHGDLTRMRLGNEDAWDLLSPDLVREALVTHADQLIRWERGIDVF  
EQVFGQSVLVTEGATWQRQRRMLMPAFTPKRVAGYAQLMTDAARSALDAVPAGQAEALV  
PMDTLWTDVAMDVILRTLFSesakadardAAWATQTLSETAFREMFMPFTLPDWLPLPGK  
AAKRRALKALKGLVQRHIGARSREAADSAGAPPRTDLLHMLLALRDESTGEPLSPQEVFD  
QCMVSFQAGHETSATLLWWSRLMAEHPEAAQRAQAEVDSVLPPGQTPGPEHLAQLPFLS  
ATLKEALRLYPPIAALMTRRTTAPITLGGVEVPQGAMLRITPWVLHRDERWFTQADRFP  
ERFLDDAPAIPKGAWIPFGVGPRVCIGQHFAMLEMTLLAAMLLQRYRLRLPEGGRASVPK  
LHVTLRPEGPMHLWLVR

>EAG14\_04345|KEGG|CYP212B7|[Acidovorax sp.]acio|BP

MAAVADPADVPRPLQLSGPRSPWWGLPLLDRMRADYLGFTVTRLHQHGDLTRMRLGYEDA

WDLMHPDLVREALITHADQLIRWERGIEVFEGQSVLVTEGATWQRQRRMLMPAFTPK  
RVAGYAQLMTDAARRALDAAVPAGQGGRALVPVDALWTDVAMDVILRTLSESAQADARDA  
AWATQTLSEAAFREMFMPFTLPDWLPLPGKADKRRALRALKGLVQRHIDARQSEAPVADG  
ASGKPERSDLLHMLLALRDESTGETLSPQEVLDQCLVTFQAGHETSATTLWWTTLMAQH  
PEAAERARAEDAVLQGGVPGPEHLAQLPWLGLATLKEALRLYPPIAALMNRRTTAPITLG  
GVAVPQGALLRITPWVLHRDARWFAQPEQFQPERFLDGAPPVPGAWIPFGLGPRVCIGQ  
HFAMLEMTLLAAMLLQRYTVRWPDAAPACAPRLNVTLRPEERVFWLERRG

>HUK68\_16805|KEGG|CYP110J3|[Acidovorax antarcticus]aant|BP

MKRGPLPPGPQWLRPLSFFQAGLTPPAPVLARLAARHGDPFRVSYLSRPVTFTGHPDALR  
AIYTASPDCEVWDGSGFIEPVFGPASVVVTSGDRHRQDRNLLAPAFSGPAMRADGAVMAA  
VAEEKMAQIAVGQPFRMLDVTQRITLDIMIRVVFGMQDETTRIARTRAAVLELIESLHVIL  
FLFPSARRVLSGWGPWARNQRAVEALGALLREQMRERRLGAASGADLLGRMLAARYDDGS  
GMDDAQILDQLRGLLFAGHEATATVLAWIFHWLGREPAVLARVAQEIKDLGPAPAPDALA  
ALPYLEMVCKECLRLYPVVD SARVVRKPFALLGYTIPAGEVLRASSALLHARPALYPEP  
ERFRPERFAERKYSSFEYIPFGGGARRCLGAAFAMYELKVVVASIVRGHRLRLLDKQPPV  
HERRALSLGPRGGVPMVQERRSLPHR

>Daci\_3643|KEGG|CYP212A16|[Delftia acidovorans]dac|BP

MGWGLLRMSRDLLGTLAQWRGEHGDAIHLRIWPEHQVVVTDPELVRELLVGQHDALVRW  
EHGISVFAQLHGHSVLVSEGQPWRSKRQALLPAFSPKAVQAQIPALAAAAQAALQAWPQQ  
SEDFPMEQALTALAMDVIMRLMFSGAIGEDARSAEQAIREVSHAANSEFYWPLRWPDAMP  
WKRRKRRALAWLRGFIARQVRLRLAQADADWPEDLLSRLRLHRGDAQAWTLQAVRDECM  
TAFLAGHETVASSLTWWSWCATHPEAQQQVADEIQEQLGRTPTAQDLPALRQLGWSLQ  
EAMRLYPAAPVLI SRRCTRPVQLGPWRLPARTLFMIAPGLMQRDARWFPQPDFAFPQRF  
DADKDGAPAAPRGSWMPFGTGPRVCLGQHLASTEMTVVAAMVLQRLRLSVPEGASAPRPV  
LQVTLRPSTPLRLRLQSRSGAQAG

>BO996\_16530|KEGG|CYP212A16|[Delftia sp.]dhk|BP

MSRDLLGTLAQWRGEHGDALHLRIWPEHQVVVTDPELVRELLVGQHDALVRWEHGISVFA  
QLHGHSVLVSEGQPWRSKRQALLPAFSPKAVQAQIPALAAAAQAALQAWPQQSEDFPMEQ  
ALTALAMDVIMRLMFSGAIGEDARSAEQAIREVSHAANSEFYWPLRWPDPAMPWKRRKRRA  
LAWLRSFIDRQVRLRLAQADEDPEDLLSRLRLRLHRGDAQAWTLQAVRDECMTAFLAGHE  
TVASSLTWWSWCMATHPEAQQQVADEIQEQLOGRPPTAQDLPALRQLGWSLQEQAMRLYP  
APVLISRRCTRFPVQLGPWRLPARTLFMIAPGLMQRDARWFPQPDFAFPQRFADADKDGAP  
AAPRGSWMPFGTGPRVCLGQHLASTEMTVVAAAMVLQRLRLSVPEGAGAPRPVLQVTLRPS  
TPLRLRLQSRSGAQAG

>I6G47\_21230|KEGG|CYP116B17|[Delftia lacustris]dla|BP

MTASAASNAAPSASAPAFAPASARCPFDHRQPSGQTGPTGCPVSAGAAAFDPFSDGYQQD  
PPEYVRWAREQEPVFYSPQLGYWVTRFDDIKAVFRDNIAFSPSIALEKITPTGEEANAV  
LASYGFAFNRTLVDNEDEPAHMPRRRALMDPFTPEELRHHEPMVRELARAYVDRFIDDGRA  
DLVDQMLWEVPLTVALHFLGVPEEDMDRLREYSIAHTVNTWGRPRPEQQVAVAHAVGNFW  
QLAGKVLAKMRENPDAPGWMQYGIKQKELPEVVTDSYLHSMMAAGIVAAHETTANATAN  
AVKLLLQHPGAWKQICENPALIPNAVEECLRHNGSVAAWRRRLATRDVVIGGVAVPAGSKL  
LIVTSSANHDERHFADADFFDIHRDNAGDHLTFGYGSHQCMGKNLARMEMQIFLEEFTRR  
LPHMRLAEQRFTYVPNTSFRGPEHLWVEWDPALNPERARPALLQARQPVRIGEALQGGAS  
RPMVVAEAEAAAEGVLRLRLKAADGHALPRWTPGSHIDLQCGDTGLSRQYSLCGDPQDTG  
SYEIAVLREANGRGGSAAVHAHLHRGATVQVRGPRNHFPLDEGASHLILVAGGIGITPIS  
AMARRARALGLSYEIHYSGRRRRAGMALLAPLQAEHGARLHLYVAEEGRRADYAALLATPR  
AGARIHACGPARLLHGLEAASRHWPEDSLRVEHFVSTVGALDPAREQGFLEVELRSSGLVL  
QVRNDQTLDDALRSKIEVQSDCREGLCGSCEVPVLDGEVDHRDMVLTRGERAACTKMMS  
CCSRARSGRLVLGL

>Vapar\_4796|KEGG|CYP102A24|[Variovorax paradoxus]vap|BP

MAGKNSLHPIPHPAKKPFVGNLLSIGSDSPVLDMWKIAQDLGGIYWLDMPGMPVIVVSSP  
ALVDELCEEARFDKSTRGALRLRAASHGLFTSDTHEETWSKPHNILLANFSQRAMQAYH  
PMMLDIAGQLVTKWERLNFDEEVDVVRDMALTLDITIGLCGFGYRFNSFYREGFHPFVDA

MVRTLETVQNRRLGLEEFMLKKELAQQRKDIRFMHKMVEDIEERRAGGADIATKPDLL  
SYMIAGVDKKSSEKLTDMIRDECIEFLIAGHETTSGLLSFAIYFLLKNPEALAKAQAEV  
DNVFGPDTSQKPTYAQVNRLQYVMQVLKEALRLYPTAPAIAMRAKEDTTIGGQYTIKKKN  
MVIMHALALHRDKGIWGEDADEFNPDHFSREAERERPVNAFKPFGNGQRACIGRQFALQE  
AVLTLGMILQRFDLVDHTGYKLRIKEALTIKPEGLKIKALLRDPATRPRGNTADAAAAPV  
QPRQAAARKPQAARHGTSLLVLQGSNLGTAEDLARQLAEAGELRGFSTQVASLDDYAERL  
PANGAVAIVCASYNGVAPDNAAEFHRWLDKADDSLNGVRFVSVFGCGNTDWAATYQAVPRR  
IDERLGALGATRVHPRGEGDAREMDGAFQDWSDALWPELVKAFGIQSGADTPAEAEPLY  
TLEELPPPQKNALVDALGAVALRVIENTRELQKDPGGAGEAGRSTRHVELMLPEGVDYRAG  
DHLSVVPNRNSPAQVERAMARFGFDRAAHVRLHADSGRKTALPVDQVIAVDRLLGDYVELQ  
DVATRKQIATLTAYTECPATRPKLAALSGSDDASQAAYKAQVLHRRRSLLDLLEEHRACQ  
LPFAVFLEMLSPLSPRYSSISSPTMTPGRCSVTVGVVSAPALSGKGTFEQVCSNYLARA  
EAGDTVHGVIRETTAEGFRLPEDAQRPVMIGPGTGLAPFRGFLQERAAQAERGQALGEA  
MLFFGCRHPEQDFIYAELEAWSHRGLMKLHTAFSRAGERKVYVQDLIREQGAAVWKLLE  
AGGVIYVCGDGSRMPEPDVRRTLADLARGHGHGDAAWMDQMIADQRYVLDVWAGA

>Vapar\_4960|KEGG|CYP229B3|[Variovorax paradoxus]vap|BP

MPLDPVAAVTHADPYPYYAELRAGPPLAWNDALHLWVASRAEVIESLLLAHGALRVRLAA  
EPVPRAIAGSAAGEVFGHLVRMNDGTAHQAHRPALQRALAGLDLGAVRMAALRVARDVPV  
QPVSDALFSMPVRTVAHLLGIADEALPQVDRWMRDFVACLSPLSTAQQQLQGASAAAGELM  
TRFEELAAGAAPRDGTLAABRAESQASAPLSRALLANLVGLLSQTCDATAGLLGNSLIA  
VMREPSLQQAAQTPGGLQAIVEETARHDPVHNTRRFVAEPVTVAGTPLAVGDAVLLVLA  
AANRDPALNPEPERFILVRARRRMLGFGHGVHACPGQALACTLAAAGLEALLHRTPDIAA  
LRARGWHYRPSVAARIIPVFH

>Varpa\_5460|KEGG|CYP102A24|[Variovorax paradoxus]vpe|BP

MAGKNSLYPIPHPAKKPFVGNLLSIGSDSPVLDMWKIAQDLGGIYWLDMPGMPVIVVSSP  
ALVDELCEEARFDKSTRGALRRLRAASHGLFTSDTHEETWSKPHNILLANFSQRAMQAYH  
PMMLDIAGQLVTKWERLNFDEEVDVVRDMTALTLDITGLCGFGYRFNSFYREGFHPFVDA  
MVRTLETVQNRRLGLEELMLKKELAQQRKDIRYMHKMVEDIEERRASGADIATKPDLL  
SYMIAGVDKKSSEQLTDMIRDECIEFLIAGHETTSGLLSFAIYFLLNNPEAMAKAQAEV



DSVFGGDTSQKPTYAQVNRLQYVMQVLKESLRMFPTAPAI SMRAKEDTTIGGQYTIKKN  
MVIMHALALHRDKAIWGENADQFNPDNFSREAERERPVNAFKPFGNGQRACIGRQFALQE  
AVLTLGMILQRFNLVDHTGYKLKIKEALT IKPENFKIKALLRDPASRPRGNGETTAAPDA  
PAKPAARKPQAARHGTSLLVLQGSNLGTAEDLARQLAEAGELRGFSTQVASLDDYAERLP  
ANGAVAIVCASYNGVAPDNAAEFHRWLDKADDALNGVRF SVFGCGNTDWAATYQAVPRRI  
DERLEALGATRVHPRGEGDAREDMDGAFQDWS DALWP ELVKAFGIKAGADTPAEAEPLYT  
LEELPPPQKNALVDALGAVALRVVENRELQSPGGDAGTSRSTRHVELMLPEGVNYVPGDH  
LSVVP RNSPAQVERAMARFGFDRSAHVRLSAAPGRKTALPVDQVIAVDRLLGDYVELQDV  
ATRKQIATLAAYTECPFTKPKLVALSGSDEASQAAYKAEVLHKKRKS LLELLEEHRACQVP  
FAVFLEMLSPLSPRYYSISSSPSMT PGRC SVTVGVVSEPALSGNGIFEGVCSNYLARA EA  
GDTVHGVIRETTAEGFRLPEDAMRPLIMVGPGTGLAPFRGFLQERAAQVERGEALGEAML  
FFGCRHPEQDFIYAEELQGWSHRGLMKLHTAFSRSGERKVYVQDLIREQAAAVWKLLEAG  
GVIIYVCGDGSRM EPDVRRTLTDIAREHGHDSNAWMDKMIADQRYVLDVWAGT

>Varpa\_5641|KEGG|CYP229B2|[Variovorax paradoxus]vpe|BP

MPVDPVAAVMHADPYPFYAQLRAGPPLMWNEKMRVWVASRADVIESVLLAHGALRVRPAA  
EPVPRAIAGSPAGEVFGHLVRMNDGAAHQGHRPALQRALAGLDLNAVHTAALRVARDVPM  
APLSDALFSMPMQAVAQLLGFAD EALPQVDRWMRDFVACL SPLSTADQLQAASAAAGELM  
TRFELLTASAPPRNGTLLAAVLAESGAGTPLSRSL LANLVGLLSQTCDATAGLLGNSLIA  
LMREPSLRQAAC TRDGLQAIVDETARHDPSVHNTRRFAIEPITIAGTPLAAGDAVLLVLA  
AANRDPAFNPEPDRFQLVRERRRMLGFGHGMHACPGQALACTLAAAGLDALLNRQPD L DA  
IRARGWSYRPSANARIPVFH

>VAPA\_1c37190|KEGG|CYP116B257|[Variovorax paradoxus]vpd|BP

MSDTAIPPHASGCPVAHGPLSSERTPTGCPVSERAAGFDPFEDGYQQDPPEYVRWAREK  
PIFFSPKLG YWVITRYDDIKAVFRDNITFSPSNALEKITATGDEANAVLASYG FALNRTL  
VNEDEPAHMPRRRVLMDFPTPEALKHHEPMVRELARSYVDRFIDDGKADLVDQMLWEIPL  
TVALHFLGVPEEDMDTLRKYSIAHTVNTWGRPKPEEQVAVAHAVGNFWQYAGKVLEKMRQ  
DPDAPGWMQYGIRKQKLHPEVVTD SYLHSM MMAGIVAAHETTANATANAMKLLLQHPQVW  
RELCEDPGLIPNAVEECLRHNGSVAAWRRLVTRDTQVGGVDLPAGSRL LIVTSSANHDEA

HFSDADLFDIRRDNASDHLTFGYGSHQCMGKNLARMEMQIFLEEFTRRLPHMRLSQQRF  
YVPNTSFRGPEHLWVEWDPANPERSSPKLRDVQVPVRIGEPSRHAIARPVVVERVTPVA  
EGIVKLRLVSPDGKPLPRWTAGSHIDVECGTPELSRQYSLCGDPDEAGVLEIAVLHEPEG  
RGGSAWVHAQVKAGDRLRIRGPRNHFRLESLPKAIFVAGGIGITPVSAMARRAKALGMD  
YELHYSGRSRRRMAFLDELAALHGERLHVYARDEGRRCDLPALLAEPVAGAQVYACGPLR  
MLEALEGCCAAWPEGALRVEHFESTLATLDPAREHAFFVELKDSGLVVIVPPEQTLLSAL  
RAANVDVQSDCEEGLCGSCEVRVLSGRVDHRDVVLTRSEREANNKMMACCSRACESRLVL  
EL

>VAPA\_1c49620|KEGG|CYP102A24|[Variovorax paradoxus]vpd|BP

MAGKNSLHPIPHPAKKPFVGNLLSIGSDSPVLDMWKIAQDLGGIYWLDMPGMPVIVVSSP  
ALVDELCEEARFDKSTRGALRRLRAASHGLFTSDTHEETWSKPHNILLANFSQRAMQAYH  
PMMLDIAGQLVTKWERLNFDEEVDVVRDMTALTLDITIGLCGFGYRFNSFYREGFHPFVDA  
MVRTLETQNRRLGLEEFMLKKELAQQRKDIRFMHKMVEDIEERRAGGADIATKPDLL  
SYMIAGVDKKSSEKLTDKMIRDECIEFLIAGHETTSGLLSFAIYFLLKNPEALARAQAEV  
DNVFGPDTSQKPTYAQVNRLQYVMQVLKEALRLYPTAPAIAMRAKEDTTIGGQYTIKKKN  
MVIMHALALHRDKGIWGEDADAFNPDHFSREAERERPVNAFKPFGNGQRACIGRQFALQE  
AVLTLGMILQRFDLVDHTGYKLRIKEALTIKPEGLKIKALLRDPATRARGNGAHVEAAVA  
PSASTKQAARKPQAARHGTSLLLVLQGSNLGTAEDLARQLAEAGELRGFSTQVASLDDYAE  
RLPANGAIAIVCASYNQVAPDNAAEFHRWLDKADDSLNGVRFSVFSGCNTDWAATYQAVP  
RRIDERLEALGAMRVHPRGEGDAREMDGAFQDWSDALWPELVKAFGIQSGADTPAEAE  
LYTLEELPPPQKNALVDALGAVALRVLENRELQKNPGGAGEAGRSTRHVELMLPEGVNYR  
AGDHLVSVPRNSPAQVERAMARFGFDRSAHVRLHADPGRKTALPVDQVMAVDRLLGDYVE  
LQDVATRKQIATLAAYTECPVTRPKLAALSGSDEASQAAYRAEVLHKKRSLDLLEEHR  
CQLPFAVFLEMLSPLSPRYYSISSSPAMTPGRCSVTVGVVSAPALSGNGTFEGVCSNYLA  
RAEAGDVTGHVIRETTAEGFRLPEDAQRPVLMIGPGTGLAPFRGFLQERAAQVERGEALG  
DAMLFFGCRHPEQDFIYAELEAWSHRGLMTLHTAFSRASERKVYVQDLIREQGAHVWKL  
LEAGAVIYVCGDGSRMEPDVRRTLADLAREHGHGDAAWMDRMIADQRYVLDVWAGA

>VAPA\_1c51480|KEGG|CYP229B3|[Variovorax paradoxus]vpd|BP

MPLDPVAAVTHADPYPFYAALRAGPPLAWNEALRLWVASRAEVIESLLLLAHGALRVRPAA  
EPVPRAIAGSAAGEVFGHLVRMNDGTAHQAHRPALQRALAGLDLGAVRTAALRVAHGVPV  
QPLSDALFSPMPVRAVAHLLGFDDDEALPQVDRWMRDFVACLSPPLSTAEQLQDASAAAGELM  
ARFEALAAGTPPRQGTLLAAVLAEGEASAPLSRALLANLVGLLSQTCDATAGLLGNSLIA  
VMREPSLQQAAPTRGGLQAIVEETARHDPVHNTRRFVAESVTLAGTPLAAGDAVLLVLA  
AANRDPALNPEPERFSLVRARRRMLGFGHGIHACPGQALACTLAAAGLEAVLHRTPDLLA  
MHERGWHYRPSVAARI PVFH

>AX767\_08380|KEGG|CYP102A27|[Variovorax sp.]vaa|BP

MAGNNALYPIPHPSKKPFVGNLLSIDSESPVMDMWRIAQELGGIYWLDMPGMPVIVVSSP  
ALVDELCEEARFDKSTRGALRRLRAASHGLFTSDTHEPTWSKPHNILLANFSQRAMQAYH  
PMMLDIAEQLVTKWERLNFDDDEVDVTRDMTALTLDITGLCGFGYRFNSFYREGFHPFVDA  
MVRTLETVQDRRGLPLEEFMMKKQLTQQRKDIRYMHTMVEDI IKERRESGADIASKPDLL  
SYMIAGVDKKSGEKLDKIMIRDECIEFLIAGHETTSGLLSFATYFLLKNPDVMARAQAEV  
DSVFGTDLSVRPTYAQVNRQLQYVLQILKEALRLYPTAPAI SMRAKENTTIGGKYTIHKN  
MVIMHALALHRDKGIWGENADQFNPDNFTTREAERTRPANAFKPFNGQQRACIGRQFALQE  
AVLTLGMVIQRFKLIDHTDYKLKVKEALTIKPEGFRIKVVPREAAALRARPSTAIADTAA  
SQVAGALAVPLAASRASRHGTSLLVLHGSNLGSAEDLARQLAEAGEMRGFSVTLASLDDY  
AERLPAAGAVAIVSASYNGTAPDNAVFEFWRWLERADGSLNGVAFSVFGCGNTDWASTYQS  
VPRRIDERLAELGAERVHARGEEDMDGAFQDWADALWPVLSKRFDLEAEAPIQAE  
LYAVEALPPPQTSGLVESLGAVPMRVVANDELQTTGGETPSGRSTRHVELALPEGVNYRA  
GDHLSVVPRNGAAQVERAMARFGFERDAHVRLHAAQGRKAFLPVDEVI AVERLLGDYVEL  
QDVATRQKIATMATHTRCPVTQKAFAALTGSDEATAAHYKREVLVPRKSVLDMEEFPVC  
ELPFAAYLEMLSPLSPRYYSISSPRVDAGRC SVTVGVVREAAARSGRGTFEGVCSNFLAR  
VEPGDTVHGFVRATTAEGFGLPDDPSKPIIMVGP GTGLAPFRGFLQDRAAQKTAGATLGD  
AMLFFGCRHPQQDFIYAGQLQAWAKEGLVDLHTAFSRAGGRKAYVQDLIREQADAVWKKLL  
EAGATVYVCGDGSRMEPDVRRRTLADIAREHGEDSDAWMDKMLSTQRYVLDVWAAS

>CKY39\_29690|KEGG|CYP102A23|[Variovorax boronicumulans]vbo|BP

MAGKNSLHPIPHPAKKPFVGNLLSIGSDSPVLDMWKIAQDLGGIYWLDMPGMPVIVVSSP  
ALVDELCEEQRFDKSTRGALRRLRAASHGLFTSDTHEETWSKPHNILLANFSQRAMQAYH  
PMMLDIAGQLVTKWERLNFDEEVDVVRDMTALTLDITGLCGFGYRFNSFYREGFHPFVDA  
MVRTLETVQNRRGIPLLEELMLKKELAQQRKDIRYMHKMMVEDIEERRTSGADIATKPDLL  
SYMIAGVDKKSSEKLTDKMIRDECIEFLIAGHETTSGLLSFAIYFLLNNPEAMAKAQAEV  
DSVFGGDTTQKPTYAQVNRLQYVMQVLKESLRLYPTAPAIISMRAKEDTKIGGQYTIKKNN  
MVIMHALALHRDKGIWGEDADQFNPDHFSREAERERPVNAFKPFGNGQRACIGRQFALQE  
AVLTLGMILQRFNLVDHTGYKLKIKEALTIKPENFKIKALLRDPASRPRGTVEAAATPDA  
PAKPAARKPQAARHGTSLLVLQGSNLGTAEDLARQLAEAGELRGFSTQLASLDDYAERLP  
ASGAVAIVCASYNGVAPDNAAEFHRWLDKADDSLNGVRFVSVFGCGNTDWAATYQAVPRRI  
DERLEALGADRVHERGEGDAREMDGAFQDWSDALWPALVKTFDIKNGADTPAEAEPLYT  
LEELPPPQKNALVDALGAVPLRVIENTRELQSAGANGEAGRSTRHVELMLPEGVNYVPGDH  
LSVVPNRNSPAQVERAMARFGFDRSAHVRLSAVPGRKAALPVDQVIAVDRLLGDYVELQDV  
ATRKQIATLAAHTECPFTKPKLQALSGSDEASQAAYKAEVLHKKRSLLEELLEHRACQVP  
FAVFLEMLSPLSPRYYSISSSPTMTPGRCSVTVGVVSAPALSGNGTFEGVCSNFLARAEA  
GDTVHGVIRETTAEGFRLPEDANRPLIMIGPGTGLAPFRGFLQARAAQVERGEALGEAML  
FFGCRHPEQDFIYAEELQAWSHRGLMKLHTAFSRAGDRKVYVQDLIREQGAAVWKLLEAG  
AVVYVCGDGSRMEPDVRRTLSDLAREHGQDSAAWMDQMIAEQRYVLDVWAGA

>C4F17\_21040|KEGG|CYP229B4|[Variovorax sp.]vam|BP

MDRNNSTPPDATLDPVAAATHADPYPFYASLRNGPPLAWNEKLRLWVASRAEVIEEVLQ  
AHGALRVRPAAEPVPSAIAAGSPAGEVFGHLVRMNDGTAHEVQRPALQRALAGLDLNAVRE  
AALQVARQVPQQQPLSDTLFSMPVRSVAHLLGFADALPQVDLWTRDFVACLSPLSTASQ  
LQGASTAAGELMARFEDLVAGTPPRRGTLAAVMAESAAPSRSLLANLVGLLSQTCDATA  
GLLGNSLIALLLREPSLRTAARTRDGLQAIVEETARHDPVHNTRRFVATPVTIAGTPLAA  
GDTVVLVLLASANRDPAFNPDPDSFVLVRAKRRMLGFGHGTHACPGQTLACTLAAAGLEAL  
LQRAPDVDAQLLRGWHYRPSVAARVPVFH

>C4F17\_22035|KEGG|CYP102A20|[Variovorax sp.]vam|BP

MAGKNSLHPIPHPAKKPFVGNLLSIGSDSPVLDMWKIAQDLGGIYWLDMPGMPVIVVSSP

ALVDELCEEARFDKSTRGALRRLRAASHGLFTSDTHEETWSKPHNILLANFSQRAMQAYH  
PMMLDIAGQLVTKWERLNFDEEVDVVRDMTALTLDITGLCGFGYRFNSFYREGFHPFVDA  
MVRTLETVQNRRLGLEELMLKKELAQQRKDIRYMHKMMVEDIIEERRASGADIATKPDLL  
SYMIAGVDKKSQEQLTDKMIRDECIEFLIAGHETTSGLLSFAIYFLLNNPEAMAKAQAEV  
DNVFGPDTTQKPTYAQVNRLQYVMQVLKESLRLFPAPAI SMRAKEDTKIGGQYTIKKNN  
MVIMHALALHRDKGIWGENADRFPDPNFSREAERERPVNAPKPFNGQQRACIGRQFALQE  
AVLTLGMILQRFNLVDHTGYKLKIKEALTIKPEGFRIKALLRDPATRPRGNMTDAAAAPV  
QPVQAAAARKPHAARHGTSLLVLQGSNLGTAEDLARQLAEAGEMRGFSTQLASLDDYAER  
LPANGAVAIVCASYNQVAPDNAAEFHRWLDKADDALNGVRFVSFVCGCNTDWAATYQAVPR  
RIDERLEALGATRVRHPRGEGDAREMDGAFQDWS DALWP ELVKAFDIKTGADTPAQSEPL  
YTLEELPPPQKNAIVDALGAVALRV IENRELQKGGNGEGGRSTRHVELMLPEGLVYRAGD  
HLSVVP RNSPAQVERAMARFGFDRTAHVRLHAVAGRKAALPVEQVIAVDRLLGDYVELQD  
VATRKQIATLAAYTECPFTKPKLLALSGSDEASQAAYKADVLHKRKSLDLLLEEHRACQV  
PFAVFLEMLSPLSPRYYSISSSPTMTPGRCSVTVGVVSGPAKSGIGTFEGVCSNFLARAE  
AGDTVHGVVRETTAEGFRLPENASRPLIMVGPGTGLAPFRGFLQERAAQIEAGNALGEAL  
LFFGCRNPEQDFIYADELQAWAHRGVMKLHTAFSRAGERKVYVQDLIREQSAHVWKLLEA  
GAVVYVCGDGSRMEPDVRRTLSDLAREHGHDSAAWMDKMIADQRYVLDVWAGS

>C4F17\_30875|KEGG|CYP108E2|[Variovorax sp.]vam|BP

MSISDIDGEIASHQLYADPLRMHAFVDRLRREDPLHWTQAPGHPPFWAVSKHADVVEVGR  
HPDVFVAAPKTFLDDEDLRVRIAETAATGGKLVRTMIHMDDPDHRKYRGLTQSFFMPAN  
IKRLETIIQDRARALVGRMLERADGCEFCNEIAVWFPLQIIMTLLAVPEKVHAYLLKLTQ  
QFLAPKDATLKRDGPEAQKGAVAREYFTYFGKMLAERRAAPLADDLGSLIAHAQVDGKP  
LETMEAVSYYVILATAGHDTTSSSMGSGLYNLLRQPGELERLRARPELMASAVEEMFRHG  
SPVKHFVRTATRDYELRGKTIRAGDEVALMYHCANFDEEVFDDPRAFRVDRAPNRQIAFG  
FSVHACLGQNLARSSMRAFFTTELLARTAHIELMGEPAFIASNQVGGLKALQVVRTTPLAAS  
ATDAQPAGAAA

>CtCNB1\_2750|KEGG|CYP1098B6|[Comamonas thiooxydans]ctt|BP

MSRFCPVYPKPHPEQTSKLRFWHARRSWMDALFERSYSMQMGEVHLPGVDLYMLNDIKE  
VKRVMQSEAQQFPKSHLLHESLEPLLGDSTFTTNGEQWQRQRTMMNPAFAQARVNVAFPR  
MLGAAQSMLERLDAVEEGQPYDIEIEMTHVTADIIFRTIFSKPMQGPDAHRIFEAFARYQ  
SLAPKLMLPALFGARWLTMPWYRWQSNQAAREIRGLLHAMIKPRYEAHLKGEAEEQEDIL  
AAFMQAKDPNTGEPFNEEELVNQVAMLFLAGHETSASALTWASYLLAQSPDIQQRAYEQV  
VEVVGDRLPQQADMKSFSQVWNIFRETLRLFPFVGFFARENVQSCPIRGKQLKERSTVVV  
APWLLQRHRKWWKNPDADFDPDRFDREEDKEAIKHAYMPFSMGPRVCLGAAFALQEAVLIL  
ACLLQRYEILPAAGHVPQPVGRLTIRSENGVRINLRKREAA

>O987\_16625|KEGG|CYP1098B6|[Comamonas testosterone]ctes|BP

MSRFCPAYPKPHPEQTSKLRFWHARRSWMDALFERSYSMQMGEVHLPGVDLYMLNDIAE  
VKRVMQSEAQQFPKSHLLHESLEPLLGDSTFTTNGEQWQRQRTMMNPAFAQARVNVAFPR  
MLGAAQAMLERLDAVDQAQPYDIEIEMTHVTADIIFRTIFSTPLQGPDAHRIFEAFARYQ  
ALAPKLMLPALFGVRWLTMPWYRWQSNQAAREIRGLLHAMIKPRYEAHLRGEAEEQEDIL  
AAFMQAKDPNTGEPFNEEELVNQVAMLFLAGHETSASALTWASYLLSQSSDVQQRAYEQV  
LEVVGDRLPQQADMKSFSQVWNIFRETLRLFPFVGFFARENVQSCPIRGKQLKERSTVVV  
APWLLQRHRKWWQNPDAADFDPDRFDREEDKEAIKHAYMPFSMGPRVCLGAAFALQEAVLIL  
ACLLQRYEILPAPGHVPQPVGRLTIRSENGVRIKLRKDA

>O987\_22120|KEGG|CYP226A26|[Comamonas testosterone]ctes|BP

MTSTSTSTSASSLERAFAGVADNYRGSVDLHAVYAAMRRDSPVVAENFMAGLGVPNIAG  
QDANRPTFTVFKYRDVMAVIRDATRFTSGFIAEGLGAFFDGLILTGMGDGEEHRRARALLQ  
PVFMPDVVNRWKPKMDAIRNEYLLPLAASKRADLMDFALHFPRLIYSLIGFPENDPQR  
INQVAAWALAILAGPQVDPEKAVRAREAAAMEAARMPLYDAVMEAVVQVRAEGATGEDLISR  
LIRAIEYEGRQLNDHEITTFVRSLLPAAGETTTTRTFGSLLVLLLERPELLDRVRNDRALVG  
KAIDETVRYEPVATFKVRQAAKDLEIDGVHIPKGAMVQAIVMSANRDEETFEHADRFIDID  
RKAKPSFGFGFGPHMCIGQFIAKTEMQVALNAVLDLLPNLRLDPAKPAPRISGAQLRGPH  
EVHVVD

>O987\_26720|KEGG|CYP116B146|[Comamonas testosterone]ctes|BP

MTISTPSRCPIDHSQFGKPTGQSGPTGCPISHGAASFDPFADGYQQDPPEYVRWAREQEP  
VFYSPQLGYWVVTRFDDIKAIFRDNLTFSPSIALEKITPTGDEANAVLASYGFA LNRTL  
NEDEPAHMPRRRALMQPFTPEELKHHEPMVRRRLAREYVDRFIDDGRADLVDQMLWEVPLT  
VAMHFLGVPADDMDTLRQYSIAHTVNTWGRPRAEEQ LAVAHAVGNFWQHAGRI LDKMRAD  
PDAEGWMQY GIRKQKELPEVVTDSYLHSM MMAGLVAAHETTANAAANAVKLL LQHPKVWQ  
EICADPSLIPNAVEECLRHNGSVAAWRRRLATKDVVIGGQAI PAGSKLLIVTSSANHDEQH  
FVDADLFDIHRDNASDHLTFGYGSHQCMGKNLARMEMQIFLEEFTRRLPHMQ LAEQRFTY  
VPNTSFRGPEHLWVQWDVSRNPERGNPAVLAEQQPVRIGESSQGGVSR SMLVQSTELIAQ  
DVLRLVRLKAPDGRDLPRWTPGSHIDLHC GDTGISRQYSLCGDPQQADTYEIAVLREEHSR  
GGSAWIHGALQAGMKVQMRGPRNHFKLDESAQQ LILVAGGIGITPVAAMAARAQALGIPY  
EIHYSQSQRERMALLTALQARHGERLQIYVGAEGQRADYQALLAQVRPDAQIYACGPQRM  
LDGLAQASQHWPEDSL RVEHFSSTLGALDPDQEHGFEVELRESGITLQVRNDETLLDALR  
SANIDIECDCREGLCGSCEVPVLEGDIDHRDMVLTRAERTACTKMMSCCSRARTPESRIV  
LAL

>CCO03\_00415|KEGG|CYP108S8|[Comamonas serinivorans]cser|BP

MTTAVATPDVDLPAHIASFLVDAQGYADVERLHDTYTW MRAHNPLGRVTHPDYAPFWAVT  
KHADVTAISRNNTLFSNGASSVICRPQAFIDH LIAKNGIPHSVKALVHVDGEEHKALRGL  
TQSWFMPNSILKLNERISALARQNVDALARHNGQT VDFVTDLALHYPLHVIMDILGVPPE  
DEPRMLALTQEFFGNQDPDLKRGLDSGGS DNGLGLGQNMLAVVADFRAYFDRLTDERRRN  
PRNDVASLLASGTINGEPLGDLQRLGYIIIIATAGHDTTSSSASCAMWALAQHP ELLPRL  
QADPALIPQFIDEAIRIATPVRHFMRTAMADTDIRGRTIRQGDWLMLCYGSANRDEEVFE  
QPFAFNIDRKPNRH LAFGFGAHVCLGQHLAKLELRLLFEALIPRLQRVEQV GEMRMMSL  
FVGGPKTLPLRCVVQ

>CCO03\_02720|KEGG|CYP153A109|[Comamonas serinivorans]cser|BP

MTINQAVQAAARERAYAMPLADVDP CNVDYFEDDTVGHYFERLRREDPVHMAVHPLHG PY  
WSITRYQDIMSVDTNHQVFSSDWSLGGITITDEKMEEARLQMFIAMDPPKH DVQRKAVTG  
IVAPSNLANMEALIRERTIKVLESLPRGEAFDWVDKVSIELTTLM LATLFD FPLEDRLL  
THWSNVATSSKLVDPDAPTPEERLAELHKMLAYFTRLWNERVNAEPGHDLV SMLAHNPAT  
RNMGPAEYMGNLVLLIVGGNDTT RNSMTGGLLAM SQNPGEWQKFRDKPELIPNMVSEIIR

WQTPLAHMRRTATQDTELNGKTIKKGDKVVMWYLSGNRDDSAIANPEQFLIDRPQARQHL  
SFGFGIHRVCVGNRLAEMQLRILWEEIHKRFVIEVLAPPKRVRSTFVRGYSEMQVRIPV

>CCO03\_08185|KEGG|CYP108S9|[Comamonas serinivorans]cser|BP

MNTALAQAPVDLPEHIAAAIVDCHKHYANVDGLCETYAWMRANNPLGRLNHPAFHPPFWVVT  
KHADVMAISRDNALFTNGAYSPTCAPQAYLDHVLATQGTRHPIKSLIHVDGAEHKELRGL  
TQAWFMPNSILKLDERIKQLAQTSVDKLSSLSAQGGVVDFVNDVALYYPLHVIMDILGVP  
PEDELRLMLKLTQELFGAEDPDLKRQSAAVSPEERAKVMMEVVGDFRNYFNALTEARRQDP  
RNDIATLLANGTVAGQPLDPLQLLGYMIVATAGHDTTSSTATMAMHALATQPGLLQRLK  
DDPKLIPAFIDEAIRVATPVRHFMRTAMADTEIRGRTIREGDWMLCYLSANRDEDVFAN  
PNVFDIDRKPNRHLAGFGFGGHVCLGQHLAKMELRILFEALIPRLQSVSLAGEMRMTATLF  
VGGPKTLPLHCVVS

>FOZ74\_03160|KEGG|CYP289F1|[Comamonas sp.]cof|BP

MTDRPSSDWDVRSDEVQRNPLAAHDRLRESHGVARSEVLHTSVFRHADVLAVVQDHARFS  
SVVSAHVAVPNGMDPPEHTSYRRLIEPYFAPDRVAAMRPLYQRLAHELLAHTRQVHARQP  
FDFIAGCALPYAARTQCAFLGWPLALEGVLCDWIARHHA AVFAQDRARLAQLGLAFEALI  
GRMLDERDASASGPPRDATEALLRERVEGQPLARAAIASILRNWTVGEIGTIAASLGILA  
DWLARHGELQQQLRAQPALQAEAEIEILRLHGPLAVNRRVARCPVQLGGHEFGAGERVTV  
HWGAANRDRPVFEAPEEFRFRGRDHARSLLYGAGIHVCPGAPLARAQLGLWLQALLGATTH  
FRLAQPAQPPQYARYPAMGFERLPLVLDWA

>LAD35\_12920|KEGG|CYP1982B1|[Comamonas odontotermitis]codo|BP

MSQPFSDDFWARMYELAREEPGRNAEVIHDGLRVVVVQDLDDADIVLRKRLANYPKNLQW  
FAQVGGQSRLTEDGDQWRFRSELSQPSFSRYDHDGRGYAISAKQTRRMAGLLAANTKVPLL  
DEDVIHHCILSIFTEMFLDVELDKIPIAHDGPSRLIELASKYTCTIHRGQGQDAHTKDHIR  
QILESRRQVFGSMQCLRDGNAYDSAMMRMLAAEAVPGYDFRFEKEMTTLFVAGADTASN  
STGWALHLLASYPELQERLHTGQRAIHTSLPDGTERCRAILADQDLKAFISELLRLHSPL



PFVTRVAKADDRLSNIDVHARDVVIVSLIGVNRKAMARPDWVPDIDAAAREGVGMGTGI  
NSSFTWGARVCGGRSFALLELTTLISFLIAELHFGLSENLPICEWVGQMRRKGGRITS  
SVRK

>Alide\_3136|KEGG|CYP289A19|[Alicyclophilus denitrificans]adn|BP

MTTTPPQWDPQAPEVQORDQRAAYDQLRERCPLAHSESQHWSVLRHAEVMRVLDDHATFSS  
AVSAHPAVPNGYDQPEHTAYRRALDPFFAPERMARFEPVCRALSGATVQEALALGGDLEI  
TQEFALPFAVRVQSAFLGWPTLLQDELLGWLRRSHAATRSGDRVQTSAVAREFEDLVERV  
RQARRDAPPTQDVSSSELMHTRVDGRLLDLRELASVLRNWTVEVGTIAASIGILMHWLAS  
HPDWQQRLREQPALLPTAIDEVLRIDGPLVSNRRITTRATALGGCPLPAGSRLSVNWIAA  
NRDPRVFGDPDAFRMDRDPGLNLLYGAGIHVCPGAPLARLELRVLEELLARTTRIVLAA  
GHAPARAVYPDAGYATLRMLG

>Alide2\_1311|KEGG|CYP289A19|[Alicyclophilus denitrificans]adk|BP

MTTTPPQWDPQAPEVQORDQRAAYDQLRERCPLAHSESQHWSVLRHAEVMRVLDDHATFSS  
AVSAHPAVPNGYDQPEHTAYRRALDPFFAPERMARFEPVCRALSGATVQEALALGGDLEI  
TQEFALPFAVRVQSAFLGWPTLLQDELLGWLRRSHAATRSGDRVQTSAVAREFEDLVERV  
RQARRDAPPTQDVSSSELMHTRVDGRLLDLRELASVLRNWTVEVGTIAASIGILMHWLAS  
HPDWQQRLREQPALLPTAIDEVLRIDGPLVSNRRITTRATALGGCPLPAGSRLSVNWIAA  
NRDPRVFGDPDAFRMDRDPGLNLLYGAGIHVCPGAPLARLELRVLEELLARTTRIVLAA  
GHAPARAVYPDAGYATLRMLG

>Rta\_14540|KEGG|CYP195A32|[Ramlibacter tataouinensis]rta|BP

MQECRMSAAEPNPPALPPVTPAMSPARAAEIAAGFDLRALPADFYANPYPVYARLRETEP  
VRRMPDGSYFLTRYADLVAVYRDAATFSSDKKVEFTPKYGEGLLEHHTTSLVFNDPPL  
HTRVRKLIMGALTRRAIAEMEPLVALVDGLLDRIAQRGGGDLIEDFASAI PVEIIGNLL  
GVPHADRGPLRDWSLAILGALEPRLTPEQEALGHRVQDFTAYLRTLVAQRRRHPGDPEH  
DVLTRLIQGEAAGEQLSEAELLQNCVFILNAGHETTTNLIGNALVALQEWPGKARLLHR  
LKHSAAHHPSGLEADLT LAVDEFLRFESSNQLGNRRALRACEVGGVALPEGALVTLCIGAA  
NRDPAQFGQPDVLRDLRESNRHLAFGFGIHQCAGLSLARLEGRIAIGRFLQRFPYRLPE

APTRGGRARFRGFLKAPFSVA

>Rta\_37620|KEGG|CYP152AR2|[Ramlibacter tataouinensis]rta|BP

MNRFFTAPKPARPIPVLAGPDHTLAF AADPYRFIGRECAARHTDVAQG RLLLAPTLFLTG  
APAAQLFYDKERFVRAGAAPEPLRATLFGKGAVQTLDGSAHLRRKAFFLEATAPARVAAL  
VRQAEVTWLTMA SHWRSQPQLVLYTSAQEWLTRSVCAWAGVPLPEHEVQLRTGQLAALFD  
SAASGLGAHLRARRARRQAETWLAGLVQEIRDGRRRVAGRTLLQAAAELTDERGEPLPAR  
IAAVELLNVLRPTVAVSVFVFAAHALHHHPGWAPTLAAGGDLGADAFVQEVRRFYPPFP  
AIAARVRDFVWEGYHFPQGRRVLLDLYGTNHDGRLWPHPGEFRPERFMGRIPGLFELVP  
QGGGRADDQHRCPEGVTLALMKLALRLLVQRSRYRLPPQNLAIMRRLPALPRDRFVIA  
DFQPV

>L103DPR2\_02277|KEGG|CYP195A34|[Limnohabitans sp.]lim|BP

MSITWQTPALSAQRVQDICSQFDLRNLPADFLANPYPVYAALRETTPIKQMPDGSFFLTR  
HADLVTVYKDAAKFSSDKRIEFAPKYNHEPFNQAPFAKPGQDAPLFEHHTNSLVFNDA PR  
HTRVRKLIMGALTRRSIDAMETGLIQLVDSLLDQLEARQHGD LIEDFASAI PVEVIGNLL  
NVPHADRGPLRGWSLAILGALEPRLTAEQETLGHRSVQAFSNYLRDLVADRRRH PGNPEQ  
DVLTRLIQGESSEHSADVLSETELLQNCIFLLNAGHETTTNLIGNALLS LLEHPAQKASL  
MADLQTTRSGSHEDAATPILNTAVDEF LRF EASNQLSNRRATVATRIGNVDLPEGALVTL  
CIGAANRDPAQFPNPEVLDLKRADNRHLSFGFGVHQCAGLSLARLEGR IALGRFLQRFPN  
YHLTATPTRGGRARFRGFLHAPFATGL

>L63ED372\_01421|KEGG|CYP195A31|[Limnohabitans sp.]lih|BP

MSADRAQKIAQTLDLRALPRDFLDNPYPVYAALRESEPFKRMPDGSYFLTRHADLVAVYR  
DAKVFSSDKQVEFGPKYNHAPFNQPPFAATGGVAPLFEHHTHSLVFNDA PRHTRVRRLIM  
GALTRRAIEAMEPGLVQLVDSLLDKIEAQGGGDLIEDFASAI PVEIIGNLLDVPHADREP  
LRGWSLAILGALEPSLTPEQEALGNRSVSEFLAYLRELVAQRRQH PGPDP EHDVLTRLIQ  
EENG DALSEVELLQNCVFLNAGHETTTNLIGNALISLQEWPAQREQLQADLKQAATEAE

GEQIMGLAVDEFLRFESSNQLGNRRALQATQVNGMDLPAGALVTLCIGAANRDPVYENP  
VQLNLRRTGNKHLAFGFGVHQCAGLSLARLEGRIAIGRFLQRFPDYQLTQSPVRGGRARF  
RGFLHAPFSIE

>L63ED372\_01617|KEGG|CYP225A10|[Limnohabitans sp.]lih|BP

MTVWHPTDDGHADLADHDSYVNGTPHNTFQRLRDEDPMAWCDWSEGKGFWSVTRHADILE  
LNRNHQRLSSAQGIRMEDQTHEEYMARRTFQETDPPEHTRTRMLVAKAFSKPMMALYEDQ  
IRELCVGILDQALGQGEFDATHQIARQLPMRMLGRIAGLPEEDLDWLVDKGDALMANTDS  
DFTSHVVDKMDTEAYRFMPFRSPAGADLFDYAARMMARKRAAGDTSGVLHLITQPDAQGN  
VISDTEFRNFFCLLVAAGNDTTRYISIAAALHALANQPGLMAQLKAVQGEAAWEGVADEFI  
RWASPATHFRRTATEDFEYHGKQVKAGDKVLLWFISGNRDERAFEQPFTVDLNRGVNRHL  
SFGQGGAHACLGMWLARLELRVLLQELIQRVDRIEQTGEHAFLRSNFVCGIKRLPVRMHL  
I

>BSY239\_1146|KEGG|CYP195A27|[Hydrogenophaga sp.]hyr|BP

MSFVLRPEHITPPMAPDRARDIAARFDLRALPPDFLANPYPVYAALREHEPVRRMPDGSV  
FLTRCADLMAVYRDAQAFSSDKHVEFAPKYGAGSALFEHHTTSLVFNDPPLHTRVRRIM  
GALTRRAIADMEPGLIALVDSLLDDLAERGGGDLIEDFASAI PVEI I GNLLDVPHADRG  
LRDWSLAILGALEPTLTPQQQALGNQAVTDMLAYLRTL VVQRRQHPGDPERDVLTRLIQG  
EDGGEQLSEVELLQNCIFLLNAGHETTTNLIGNGLIALQEHPQARQFLHTALKQTEDDAA  
AQEAVLTRAVIDEFLRFESSNQLGNRRRAVKDTQVGGVALPAGTLVTLCIGAANRDP AQFPD  
PEVLKLARENKHLAFGFGIHCAGLSLARLEGRVAIGRFLQRFPDFKLTEAPVRGGRAR  
FRGFLRAPFSVS

>BSY239\_2681|KEGG|CYP199V1|[Hydrogenophaga sp.]hyr|BP

MTHPNPYDNVPTSDFDPYATEVLANPYPHYEQLRELGPWAWLERYGVLAVARHDEVQRIL

SQPDIFCSSLAGVGLANFHTETPWRKPSIILEADPPHHSRTRKVVARVLSPASIGRLRATF  
EDVAARMVDELVERGSFDAAKELCEAFPIKAFGDAVGLPAEGREHLLPYGDMVFNGFGPI  
NERFQDRMNSSGEAVNWIAKVCQORDALTPDGLGAQLFAAADAGEIGHDEAGMLVRTLLSA  
GLDTTVFTLCNAFTSFARNPGQWALLRDDPSLARQALEEVLRYDSTFHSFYRTSTQDVEL  
GGITVKQGQKIVVFIASANRDPRRWPEADRFDITRRATGHMAFGTGIHGCAGQMMARLEG  
EIVLTALARRVASIRLDGEPVQHFNNTVRGLKSMPVTVEPLLAAVH

>LPB072\_02045|KEGG|CYP212B6|[Hydrogenophaga sp.]hyl|BP

MKTDYLGFCTRLRRDHGDISHMKLLSENVWDLMSPDLVREALVTHADHLLRWERGIEVFS  
EVFGQSVLVTEGATWQRQRRMLMTAFTPQRVNGYAQLMTTAAKEAFDAVSPKGQERALVN  
MDTLWSGAAMDVILRTLFSQTAEPESLAAAKATQVLSTTGYREMFHLFTLPDWLPLPGKA  
AKRQALHTLRSLIRGHIDARRSSHVEGGDHADLLGRLLALRDEETGEILSPQEVFDQCMV  
SFQAGHETSATALLWWSRLMAEHPEAAKRAREEVASVVGAGTPGPEHLPQLPWLTLATLKE  
AMRLYPPVAAIMARRTTAPIELGGWHTPKGAMLRIAPYVLRDERNFANAEAFLEPERFLE  
GASPIPRGAFMPFGAGPRVCLGQHFAMLEMTLLSAMLQRFELHLPDNAPRAEPPEMHVTL  
RPFQSIQLWLHRVFNARAGQGAAP

>E5678\_02035|KEGG|CYP195A29|[Hydrogenophaga sp.]hyc|BP

MTTPLAPQTITPAMTRERAQAVASGFDLRALPPDFLANPYPVYTELRETEPIKRMPDGSV  
FLTRHADLMAVYRDAQHFSSDKHVEFAPKYGAGSPLFEHHTTSLVFNDPPLHTRVRKLIM  
GALTRRAIADMEPGLIQLVDKLLDRIEAQGGGDLIEDFASAI PVDII GNLLGIHEGERGP  
LRQWSLSILGALEPVITPAQQVEGDRSVTAMLTYLKGLVAERRLRPGDPERDVLTRLVQG  
EANGEQLSEVELLQNCIFLLNAGHETTTNLIGNGLILLQEFPETKDKLLRNMAAVDHDAA  
AHEAVLSAAVDEFLRYESSNQLGNRRVVHATQLSGVDLPVGSVLTLCIGAANRDPAAFAL  
PETLDLQORSPNKHAFGFGIHCAGLSLARLEGRIAIGRFLQRFPGYHLTAPPVRGGRAR  
FRGFLHAPFATV

>HPF\_14080|KEGG|CYP2730A1|[Hydrogenophaga pseudoflava]hpse|BP

MAGLPDWA VEILKHHPQKVSHGLNLVLKLKHPELMPLVLWDIVVARPLIQRALDGLSFIH  
FARFVPSWDGKALMVITEFDGPLEPYVMDFAIAIGDVFDRLLSYTEGAPPLPVREHPDEF  
WTFVQEWNRVPFFFPWDGERPDPKDPNSPFFPSEFDYPLY SAYPKLSAIDIAGPHEKRLPP  
ALDNPAADV DARDVQGNILRPYAAATARYLFLRVTDAAARARLWLAQQAAPAAADRTDAWP  
PVTDASPWPRGADERVKKPAQMLNVAFTTFAGMQALLPKRLEDLRLFPQA FRQGALERAKA  
NGDISASKPDHWLIGKPGQVLHVLTTLHTFASESIGDADWQLFTA AFDALKANAVAHGFA  
VEATHEAQAF LGQDRQPTGEIYFGYHDGIAQPRIAGQCPAHGGLKSDFQPAASPGEFLLS  
EAYS DIFRGPSLGNLPPELARNGTYAALRLLEQDVEGFDGMLASESASAGVPAAELQARL  
MGRWANGDPLTLSQTPPPLGTTSSRNDFDYAPSWEQPDLEQDHAGHLCPVGAHIRRTNPR  
SARVAGQRHSRRLIRRGMP TQWEESGTTTRGLLGLFICGSLERQFEFIQREWIQGDLAAS  
GIAGMQDP IAGLRDKPTDFHFFAGGQEGQARLVKVPPLVTTTRGSLYLFI PGMGTLRHLEQ  
VNDGKWRPPAHTSIATSAPASSVQVDLQTVSLAADALEKQRAAAVQIAKDV TENQFGVTQ  
VQANSPTQVPGSVPLKVKGRAPVAALSSLATLEEMARRPIETLRQTGPILSVTVEASFSG  
DAPLV DLPDAIRKMLAELVLEGV RSEWFKRLIEAFAPPPPDNPASGQPALGLPITELDPA  
DAKFIIDPFGYWKQLRDAGMPVVWSKAH RAYWVLDYNLGQLVLSEPIDFVQQPSGAKLRG  
IITLDPPRHTAVRKAVEEALMVAAAKNRVDGLVDDAVRAALESIGNLQQF DAVPLFTNAV  
PAQVYWNV FGLPEENRIECAALARTVMLHFGQPEHRGVGDQLVSADASVRLVTRLALLLA  
EALLAGLLEYLTGRNRFKGTLIGELADRVELPYMPSVKRVIGFEEALLTLLQLVL AGFMS  
MQFLMG TALRNLLSPDPRANRGGEQPWAALGALLKGKPPDFPAALALALEEARRFDP PVT  
IVQRFVGPNGAKLHG VQVAKDSPVFVVVGSANRDAAVAFDEPDQFHWDRPAGAGHLSLGH  
GIHLCVGQTLQQLIVPSALTALLKAMPSLQLVDSAATPAWLDNVYFRALQSLPVHRC

>HPF\_17070|KEGG|CYP195A33|[Hydrogenophaga pseudoflava]hpse|BP

MIQPQQITPPMSAERAREIAATFDLRALPADFLANPFPVYALLREHEPVRRMPDGSLFLT  
RHADLMAVYRDAAVFSSDKHVEFAPKYGVGSPLYEHHTTSLVFNDPPLHTRVRKLIMGAL  
TRRAIADMEPGLVTLVDQLLDRIEAQGGGDLVEDFASAI PVEIIGNLLGVPHADRGPLRD  
WSLAILGALEPVPTPEQHAAGNRSVTEMLAYLRTLVAARRQAPGDPERDVLTRLIQGEAS  
GEKLSEVELLQNCIFLLNAGHETTTNLIGNGLIMQEFP AQRKQLLADLRTAGTDEAARE  
QVLT LAVDECLRFESSNQLGNRRALTAATVGGVALDAGALVTLCIGAANRDPAVYDQPET

LNLRREGNKHLLAFGFGIHQCAGLSLARLEGRIAIGRFLARFPRFELSAPPVRGGRARFRG  
FLSAPFRTA

>F9K07\_04220|KEGG|CYP105T5|[Hydrogenophaga sp.]hyn|BP

MSDTRVPASTPRCPFHHDSHAEGDVAALDAFPFPRTDKLGPPTQYAAYREARPVARVCLW  
DGSAAWLVTTRYEDVKAVLGDRSFSVDPKGLKSTSPARAAQIASRKTFINMDDPEHLRLR  
RMLAPEFMQPSLQRLRPQIEQCVQARMDAMERKGTADLVADFAVPIPSEVISILLGIPS  
EDIEQLNHLSTRNDHSAGVQVVEAAAQAMEDYLDQLIQKKKRDRHSDPGEGSDLLSRL  
VNQQVLPGLTHDGAVKMAALLYSAGHGTTSNQIALGALGFLWPDQIELLKADPSRLAG  
AVEEMLRFHTVAHMNSARLATQDVTVGGLIRAGETVYAMDASANRDPTVFEEPDKFDIC  
RAGNKHLLAFAYGIHQCLGQPLARLELTVVYERLFQRFPRMRLAQAPETLEFSESSQVYGV  
KCLPVEWS

>F9K07\_04270|KEGG|CYP105T6|[Hydrogenophaga sp.]hyn|BP

MPLPRDDGPLNPPGGYARLRSECPVSRATLWDGSEAWVTRWQDVR AVLSSPSFSSDPNT  
PGFQSLSQARQQQVLARNTFINMDDPEHARFRMLTRDFMQKRMGEMKPQVDSLLEGLYA  
GLEQSPQPSDFMEKVANPLPVMVVSLLIGVPFEDFEMLGRWSNLRIDHRAAPQEIRQATL  
DMEAYFENAIRERLKKPGDASDLLTRLVQEQLQPGHIELEELVRLSALLYSAGHGTTSTQ  
IGMGTLTLLRHPEQKDAMAADPALVPRAIEEMLRYNAIAHLNSSRVAIADVEIGGQSIKA  
GESVHAMLVAANRDPATFENPDRFDIHRQSQPHVAFSYGVHQCLGQPLARLELNAVFTL  
FQRFPRQLAVPFEELRFNAMSQVYGVEALPVTW

>F9K07\_19630|KEGG|CYP195A30|[Hydrogenophaga sp.]hyn|BP

MSLLRDAITPPMSAARAQAIQSFDLRALPADFLANPYPVYAALREAQPVRCMPDGSVFL  
TRSSDLVAVYRDAQSFSSDKHVEFAPKYGEGSPLFEHHTTSLVFNDPPLHTRVRGLIMGA  
LTRRAIAAMEPGLTMLVDGLLDEMDARGGGDLIEDFASAI PVEIIGNLLNVPHADRGPLR  
AWSLAILGALEPTLTAQQQADGNQAVSEMTAYLRTLVAERRRRPGDPEHDVLTRLIQGEA  
GGEQLREVELLQNCIFLLNAGHETTTNLIGNGLILLQEFPEARAGLLHALRETAGDAAAQ

EAVLGRAVDEFLRFESSNQLGNRRRAVKDTQVGGVDLPAGTLVTLCIGAANRDPAQFAEPD  
VLNLAREGNKHLAFGFGIHQCAGLSLARLEGRIAIGRFLQRFPHFRLSDAPTRGGRARFR  
GFLRAPFLLV

>H9K76\_13975|KEGG|CYP1982B1|[Diaphorobacter ruginosibacter]drg|BP

MSQQFSNDFWNRMYELAREAPGRNAEVMHDGGRV VVVQDLDDADAVLRKRLANYPKNLQW  
FAQVGGQSRLTEDGDQWRFRAGLSQPSFSRYDHDRGYAISARQARRMAGLLAANTKAPLL  
DEDAIHHSILSIFTEMFLDVELDRIPMAHDGPSRLIELASRYTCIHRGQGQDAHTKEHIR  
QILESRRQVFGGMQCLRDAGEYDSAMMRMLAAEAVPGYDFRFEKEMTTLFVAGADTASN  
STGWALHLLATYPELQERLHAGQRAIHASLPDGPCKAILADQDLKAFVSELLRLHSPL  
PFVTRVARADDRLSDIDVHAGDVVIVSLIGVNRKAMARPDFWIPDIDAAAREGVGMGTGI  
HSSFTWGARVCGGRNFALLELTTVLSFLIAELRLELSEDLPVENEWVGQMRKGGHRVRV  
TPRVLFSPIFDQ

>H9K76\_15125|KEGG|CYP1982B1|[Diaphorobacter ruginosibacter]drg|BP

MSQQFSNDFWNRMYELAHEAPGRNAEVMHDGGRV VVVQDLDDADAVLRKRLANYPKNLQW  
FAQVGGQSRLTEDGDQWRFRSGLSQPSFSRYDHDRGYAISARQARRMAGLLVANTKAPLL  
DEDAIHHSILSIFTEMFLDVELDRIPMAHDGPSRLIELASRYTCIHRGQGQDAHTKEHIR  
QILESRRQVFGGMQCLRDAGDYDSAMMRMLAAEAVPGYDFRFEKEMTTLFVAGADTASN  
STGWALHLLATYPELQERLHAGQRAIHASLPDGPCKAILADQDLKAFVSELLRLHSPL  
PFVTRVARADDRLSDIDVHAGDVVIVSLIGVNRKAMARPDFWIPDIDAAAREGVGMGTGI  
HSSFTWGARVCGGRNFALLELTTVLSFLIAELRLELSEDLPVENEWVGQMRKGGHRVRV  
TARS

>C6571\_02485|KEGG|CYP289E1|[Simplicispira suum]simp|BP

MPSHPKPDWDPLSPQAQHDPQATADGMREHCPVAWSQALHWSLFRHADVLRAVKDHTTFS  
SVVSRHVAVPNGMDPPQHTVYRRVIEPYFSKARVDAFEPQCRAMVRSLVATLPRSAPIEW  
IDALALPFAVWAQCDFLGWQDEDHAALAQWMQANYAATLAQDRAAHTELAAARFQAVVTAQ  
LERRRGIGAAAAPGDLTWALMQEKVHGVPPLTDAEIASILRNWTVGEIGTMAASAGILCDW  
LAHHAPVQAQLREHPSAIPAAVEEILRLRGPLATNRRITTCPVDIGGRHLPAGSRVTLHW

PAANRDARAFDAALEYRPERDQTANLLWGAGVHVCPGAPLAQMELRVLLLEEVLVSGASME  
TVPGESPEPAMHPASGWARVPLRLVPLQA

>SRAA\_1070|KEGG|CYP203A12|[Serpentinomonas raichei]cbaa|BP

MTPFQFDPYAPAVDADPFPHYHRLREEFPCFWSEQAQM WVLSRYADIVSALNDWQTYSSA  
SGNLMTELPGRAGATLGSSDPPRHDRLRALVQHAFMKRNLLALEEPIRAVAQQVFGQLQG  
VDQFDFKDVSSQFTVKVLM TALGLPMGDEALVAEHEVRDHAVLMVQSDARTRAKGPEHIA  
AYQWMQNYAAQVIALRRAEPRNDLISHFAMAEIDGDRLDEREVLLTTTTLIMAGVESLGG  
FMMMLAYN LASFDAARRAVVADPALLPDAIEESLRYNTSAQRFRRRLMCDVTLHGQTM RQ  
GDFVCLAYGSGNRDPRQFPQPD RYDLARKPRGHLGFGGGVHACLGTAIARLALKIAFEEF  
HRV VPEYHRVADQLPWMPSSSTFRSPLVLELAVG

>SMCB\_0828|KEGG|CYP203A12|[Serpentinomonas mccroryi]cbab|BP

MFSFQFDPYAP AIDADPFPHYRRLRDEHPCFWSEQAQM WVLSRYVDIVSALNDWQTYSSA  
SGNLMTELPGRAGATLGSSDPPRHDRLRALVQHAFMKRN LQALEEPIRAVAQQVFGQLRG  
VSQFDFKDVSSQFTVKVLM SALGLPMGEEALVAEHEVRDHAVLMVQSDARTRAKGPEHIA  
AYQWMQNYAAQVIALRRAEPRNDLISHFAMAEIDGDRLDEREVLLTTTTLIMAGVESLGG  
FMMMLAYN LASFDAARRSVVADPSLLPDAIEESLRYNTSAQRFRRRLMKDVTLHGQTM RT  
GDFVCLAYGSGNRDERQFPDPDRYDIGRKPRGHLGFGGGVHACLGTAIARLALKIAFEEF  
HRV VPEYHRVAEQLPWMPSSSTFRSPLVLELAAG

>IS481\_09000|KEGG|CYP152B10|[Schlegelella thermodepolymerans]sthm|BP

MPRDPRLDSSLALLADPYRYIGKQCRAFGTDLFEARLLLQPAICMTGPAAAALFYDPQRF  
VRAGAAPGPLRATLFGNGGVQGLDGADHHRKALFMALMQPATVAELGQRYQEQLERSAA  
GWIGQRRVRLYEALHLPLARAVCAWADVWPWEAEEAGRCADLVALFDQAAAPGRGHFFHA  
RAARKRCEAWAGRLVEAVRQGRQPVRAGSALAAVAMHRDAGGQRLPVPVAAVELLNLLRP  
TVAVSVYVVFVAHALHRHPECALALQQRSNGDYAECFVHEVRRCYPFFPAVVARVREDFE  
WNGYAFPAGRRVLLDLYGTNLDPRTWHDPLSFQPERFRERTPGRFDFVPQGGGDPHLGHR  
CPGEAIALELMQRSARFFATRLRYAVPEQDLTLDMTRAPALPRDRMVIAQAMPALP



>IS481\_11920|KEGG|CYP116B144|[Schlegelella thermodopolymerans]sthm|BP

MELKSHPAGRCFVAHEAVTGAPTGCPVSARAAAFDPFQDAYMEDPAEFVRWAREQEPVFY  
APRLGYWVTRYQTIKDIFRDPVTFSPSIVLERMSPTSDEALQVLKQYGYAMNRTLVDNED  
EPIHMARRRVLMAPFTPEHLAGHVPMVRELVRKAVDRFIDDGRADLVDQLLWEVPFTVAL  
HFLGIDAEDREKMRRFSIAHTVNAFGRPSPEQQVSIHTVGQFWQFAGEVLEKMRRTPDG  
PGWMRYSIRQQKLYPDIIVTDSYLHSMMAIIVAHAHTTAFASANAIAIKLLQHPTAWRDL  
EDPALISPAVEECLRYSGSVASWRRRTTRDVVLDGVPVPAESKLLLVSSANHDGAHFVD  
PDLFDIRRENSAEHLTFGFGAHQCLGKNIGRMEMQVMIEELSRRLPHMKLAPQTFEYVHN  
VSFRGPQHLWVEWDPARNPERRDPSILQRRHPVRIGAPHARDKVRPLVVRAAEPVAEGIV  
RLRLAATDGRPLPQWAPGAHIDIECGETGLSRQYSLCGPLSDTSEWTVAVQLDPASRGGS  
AWIHRHATPGTVLRARGPRNHFRLEQARRLIFVAGGIGITPIMAMAERARALGIPYEIH  
YSVRCRACLAFERELRELHGERLHLYVSEEGRRNDLAGLLATPDPQARIYACGPQRMLEA  
LERLAAGWPEDALRIEHFSGSAPRLDPSCERPFEVELRNSGLRLEVPAVRTLLLEVLASN  
VDVQSDCEEGLCGSCEVGVLEGEVDHRDSVLGRAERQGHRRMMACCSRARSQRLVLDL

>IS481\_12540|KEGG|CYP229P1|[Schlegelella thermodopolymerans]sthm|BP

MDEEILDVAAVTAPDPYAAYAAWRARGPLVWHERLQLWLATDAAAVEAVLSHPALHVRP  
AGEPVPRGLAGSAAGAVFGQLARMNDGPAHQDARQALQARLAHIELPRWSALAQRHARRL  
PVPGAGALDEWVVRVPLLAVALAEVLGIAQSLQDEVVTQAHRFAGISPLASMSQREAAAEA  
AQRLAGWLDPVAGPTPEGLSRACWVANLLGLLSQTCDATAGLIGNTLVALAREPGLWPRL  
RDDAGALREAIEEVARHDAPVQNTTRYAHAEGALVLGQQIAPGQAVLVLLAAAGRDPAH  
PEPDRFMLRRAPRPVPGFGHGHPRCLGERIACALAQGALSVPVPPGAVEVARAFLQRPYR  
PSVNARIPWFAPEEAA

>G8A07\_01530|KEGG|CYP1097A20|[Kinneretia sp.]kia|BP

MELSSPSAAAGRSYRDLPGPRGIPLLGNALQIESARFHQQLEHWAAIHGPLYRLQLGDRR  
AVVVGEHQAVAAILRDRPEGYRRTTKLEAVWREMGLPVGVFAGHGEAWARQRRMVMAGFD  
PGHVREYFPAMQORVAARLAARWRLAARVERSIDLQADLMRYTVDTIAGLAFGTEVNTLAP  
EAGEEVIQRHLDKIFPALLARVLAPLPLWRWWPSRADRELAGSIEAVNTAVASFIARSRA

RLMAEPSRRARPTHLLLEAMLVAADQPD SGVDDDQVAGNVLTMLLAGEDTTANTLAWLIYL  
LWRHPVALARVQAELLDGAPQAEQTGQEQLAGLAYLDACIQETMRLKPVAPILALQALQE  
RRIGDLHIEAGTVVLCLLRHDSVDEAQVPRPQAFEPERWLDGTSAAALRHLAMPFGAGPR  
ICPGRYLAILEIKLAMAMLLGRFEILAVDTPEGGEAAERLVFTMAPTSLGMRLRER

>G8A07\_02905|KEGG|CYP212E1|[Kinneretia sp.]kia|BP

MQQAHHSLSPPQPALPPGPRQRWLGLPELGAMRRDYLGFMSALRRRHGDIVHMRLVGYRD  
YSFFHPEQVRELLLAHERLIRWERGTEVFASAHGRSVLVAEGAAWQRQRLLQPAFAPR  
QVEAFAPRMAEAAEAALARWPARDQFPFEAAMTQLTMEVILRSLFSRADEAPSRAAAQA  
VHRLGQIGMSEMYWPVSAPLWAPWKAGKRRALATLDALIHGELARRRREPPPADAPADLL  
QMLLALRDGEADERPALSERALRDECMTIFLAGHETSASALTWWGWCMTAHPQAQARAAA  
EVLAQLGPTRAPT MADLPRLPWL TACIKETLRLYPPAPALLTRRSIAPLTIGGHELPPGA  
TIRLT PGVIQRDPRWFEEPEAFRPERFDPASGHAEIPRGAWLPFGAGPRVCLGSHFALTE  
ITLIAALILQRHELHPQPGAPAPRPVLNITLRPEQALRLALRRRD

>C1M51\_06735|KEGG|CYP1097C1|[Methylibium sp.]metp|BP

MREPNEADDAAVARARAADAAPLRSVAGLPGPRGWPLIGNLLQFDLPRLHRQFEDWADRH  
GPTYRLRLGRREVLVISDAETIAALLRDRPDTWRRMRPIEAVIREAGGHGVFSAEGDDWR  
RQRRLVMSAFDPPGHLKRFYPSLQRVTERLRVSWCEAARRGEAIDLQASLMRYTVDVTTGL  
AFGVDLNTIEAPHPLQEHLDKLFPMLFRRVNLFPFYWHYLRLPIDREYDRHLRRVHEAVR  
GFVQAARQRLQDEPARRERPTDLL EAMLAARDADGSALTEEEVAGNVLTVLLAGEDTTAN  
TLGWAIWLLHEHPDDWRALVAEVDAA LGDARLPPSFDAARGLASIEASVGEAMRLKPVAP  
LLFMEAI RETALAGFRLPPGAVVFCLMRRAALDARLAEDVADFRPGRWQDGAERAVQKAS  
MPFGAGPRLCPGRYLALLEMKMVLGMLARNFELLEVGPEGGGVPGERMAFTMFPVGLKMR  
LAERVRG

>GJA\_4741|KEGG|CYP1097A11|[Janthinobacterium agaricidamnosum]jag|BP

MHTDTPDTTADQPLRRIKDLPGPRPLPLIGNGHQIKPQRIHQHVERWSLQYGPLMRMYFG  
ATPILVVADHEMVGAVLRDRPDGFRRPSISATISNEMGGIPGLFLAEGADWRNQRRMVMA  
GFAPTAIKAYFPALVAVALRLRRRWQAAASARKAIDLESCLKRYTVDIIAGLAFGSDVNT  
LESGEDVIQRHLDDILPAVARRSLALVPYWRYVKLPADRRLDRSVAVLRTAVQDLIGQAR  
QRMLDNPARRERPPNLLLEAMIAAADQSGSGVTDLNVAGNVTNMLLAGEDTTANTISWMIY  
LLQRHPHTLQKARDEVRRNAPDAARFTIEQLDSL DYLGACANEAMRLKPVAPYLPLEALR  
DTVIGDVAVPAGTMIWCVLRHDSVAEKHFDPPLLFDPPQRWLQADGKPNSDKRVTMPFGAG  
LRTCPCGRYLALLEIKIAMAMLLGSFDIAGVDTPDGKEAQELMGFVMSPVGLSLRLE

>YQ44\_18725|KEGG|CYP1097A5|[Janthinobacterium sp.]jaz|BP

MPISREIADLPAPPTLPFLGNAHQLNPRNIHQTMKEKWSGSYGPIFRARIGSRQVVLSDS  
AAISQVLRARPDTFRRPAVTADISAEELGGAPGLLLAEGDEWLTQRRMVMHSFSPSMVKAY  
FVRLRQVGLRLAQWSTAAQAQQEEMDLSGDLKRYTVDVIAGLAFGEDVNTLLNGDDKLQE  
DVSEVMAGVARRSLMPFPYWRWLRLPADRRRLERSVRALQAATDGFIAQARKALAADSALR  
AQPVNMLQAMLLAAEKPGSGVNHAVISGNVSTMLLGGQETTASALAWLIWLLWRNPTALK  
QAQQEVLNKVSDTRTMTPEQMDSL DYVEACALEAMRLKPPAPFLPLQALCETTVLDVRLP  
ADTLLWCVLRHDSVAEAFMPAAQRFNPERWLGDDGAARRLSLPFGAGPRMCPGRYLALME  
IKVAMVTLLANFDVSQVRPLTGAAPNEVMGFTMMPTPLAITLRQRESAALD

>YQ44\_23945|KEGG|CYP1097A1|[Janthinobacterium sp.]jaz|BP

MPPLDHAAAPAIARPLRQIRRLPGPFALPIVGNSLQIKLTRIHRDVEQWVQRYGPYLRW  
FGRTLVLVADSEAVAVALRDRPDGFRRPLSSFIVSEEMGGIPGLFLAEGAQWRNQRRMV  
MAGMAPGAIKAYFPALVSVAQRLRRRWHLAATQGQAIDLDGDLKRYTVDIIAGLAFGTEV  
NTLESGEDVIQRHMDDILPAVARRSLSMFPYWRYVKLPIDRRLDRDVAALSAAVADLVQQ  
ARTRMAHDPARRERPPNLLLEAMIAAADEKDSGVDDRAVAGNVLTMLLAGEDTTANTISWM  
IYLLQRHPRSLARAREEVRLAPDAAHFTIEQMDSL DYLGACASEAMRLKPVAPFLPVEA  
LRDTVIADIAVPAGTLVWCVMRNDTVADAHFPDAQAFQPERWLAQSSEANNKRASMPFGA  
GLRTCPCGRYLALLEIKIAMAMLLGSFDIAGVDTPDGGEAQELMGFVMSPIGLSLRLARPQ

>BZG29\_04195|KEGG|CYP1097A1|[Janthinobacterium sp.]jal|BP

MPPLDHAAAPATTALRQIRRLPGPFALPIVGNSLQIKLTRIHRDVEEWVRRYGPYLRWF  
GRTLVLVVADSEAVGAVLRDRPDGFRRLSSSLVSEEMGGIPGLFLAEGTEWRNQRRMVM  
AGMAPGAVKAYFPALATVAQRLRRRWHLAATQGQAIDLDGDLKRYTVDIIAGLAFGTENV  
TLEAGEDVIQRHMDDILPAVARRSLSMFYWRVVKLPVDRRLDRDVAALSAAVADLVQQA  
RTRMARDPARRERPPNLEAMIAAADLEGSGVTDRNVAGNVLTMLLAGEDTTANTLSWMI  
YLLQRHPHTLARAREEVRRLAPDAARFTIEQMDSLDYLGCASEAMRLKPVAPFLPVEAL  
RDTVIADIAVPAGTLVWCVMRHDTVSDAHFPDAQAFQPERWLAEGGEANNKRAAMPFGAG  
LRTCPCGRYLALLEIKIAMAMLLGSFDIAGVDTPDGGEAQELMGFVMSPIGLTMRLARPQ

>CNX70\_04245|KEGG|CYP1097A1|[Janthinobacterium svalbardensis]jsv|BP

MSMPPLDHAATPDIAARPLRQIRRLPGPFALPIVGNSLQIKLTRIHRDVEQWVQRYGPFMR  
AWFGRTLVLVVADSEAVGAVLRDRPDGFRRLSSSVVSDMGGVPGLFLAEGTEWRNQRR  
MVMAGMAPGAIKAYFPALVTVAQRLQRRWHLAATQGQAIDLDGDLKRYTVDIIAGLAFGT  
QVNTLESGEDVIQRHMDDILPAVARRSLSMFYWRVVKLPVDRRLDRDVAALSAAVADLV  
QQARTRMAHDPARRERPPNLEAMIAAADLEGSGVTDRNVAGNVLTMLLAGEDTTANTVS  
WMIYLLQRHPHTLARAREEVRRLAPDVARFTIEQMECLDYVGACASEAMRLKPVAPFLPV  
EALRDTVIGDIAVPAGTLVWCVMRNDTVADAHFPDAQVFQPERWLAEGGEANNKRASMPF  
GAGLRTCPCGRYLALLEIKIAMAMLLGSFDIAGVDTPDGGEAQELMGFVMSPIGLTLRLAR  
PQ

>EKL02\_04155|KEGG|CYP1295B1|[Janthinobacterium sp.]jaj|BP

MKTSDDHDKIPPGPSAPWLGLPLLGMKNDLLGTAQRMREQYGDVVHFRMASQPYYYFFS  
PELIRELLVEHADDLIRHERAIEVFSLVYGDNVLTTEGDTWKRQRRILMPGFLPKKITGY  
VDLMTGAVADAMVTAFPEKGPAGNVLDVDSFTTVLTMDVILRVLF SHKVSEAESQRAFEA  
SRALEHQGMRELFWPKTPPDWFPYPGRKQKLKSKADLENLIGSQVQVRRRAAGEDQATKTD  
YLAMLLSAHDDEAQGASSSPTLSTEEIRDNCMVIFAAGHDTTATVMTWWIGLMAHHPEVA  
EKVRQEVAEVAGDRNPTADELSRMKWMNATIKEAMRLYPPTPNLFFRCPPVRDIEIGGWHV  
PKGASINVPVWHVQHDARWFPEPESFRPERFMPNAAEIPRGAYMPFGAGPRVCIGQHLAT  
IEMALIATFLIRQFDLSPGDAAGLPSPKIDMVLKPETTLRVKFTRR

>EKL02\_04905|KEGG|CYP1098B4|[Janthinobacterium sp.]jaj|BP  
MSRFCPVYPKPHKARSGALRLFSSLRRSWLDGLVERNYQMMAEVKFPGLDLYIVNDPKL  
VREAMVDEYANFPKTDLLGKLDDPLIGPSIFTTNGRQWQIQREMVGTGFSHMRLKTAFPL  
MMAAVDAMEARVAALPDGIVTDIDQEMTHVTADIIFRTILSLSMESDARKIFHNFNIFQ  
KMAPRQITPIMFGLPRWLSPWLDIYRSNRAAREIRSLLEKFIRPRFDAHRAGNPGEHQDI  
LSALLGAKNPDTGDGFAFSELVDQVGMLFLAGHETSASALAWSLYLISMSPEIQERMHAE  
LSAVVGDDGDI EYGHVKDLELTWNV FRESRLYPPVGFFVRQAKVGR TMRGKNVAKDAIIV  
IAPWLIQRHRDLWERPDEFDPDRFASDSAKESLK CAYLPFGMGPRVCIGASFALQEAA LI  
LATLVRRFRFAAPPDGGAPQPVGRLTIRSENGVRVTIHKRTAT

>EKL02\_15905|KEGG|CYP1098B2|[Janthinobacterium sp.]jaj|BP

MSRFCPVYPKPRKNKASALLMLFGKRRSWLDGLYERSYGMKMGEVKLPGAQLYMVNEPPL  
VRRILIEQAAKFPKHTMLGKLLAPLLGESIFTTNGAQWQRQRTMMDGSFAQTRLKLVFPPL  
MKAAAAAMKERLDKLEDGAEYDIDLEMTHVTADIIFRTILSQTLEGETSRKIFEEFTRFQ  
EMAPRIILNPMLFKLPRI FSPWLAI RRSNRAAREIRAQLEVFIRPRYDAHRAGTPGEYQDI  
LASLLDAVDPVAGTAFSFDDELVDQVAMLFLAGHETSASALSWAMYLI SHRAEIQERMHAE  
AMAVMGEREPDYSDIKSMELIWNV FRET LRLYPPVGFFAREATETQGM RDKTVHEGASVI  
IAPWLIHRHRELWERPDEFDPDRYGSASARESLK CAYLPFSLGPRVCMGATFALQEAGLI  
LATLVKHYRFEAPAGYTPEPVGRLTVRSENGVRV IIRKRKQGNGEAA

>FJQ89\_21240|KEGG|CYP1097A1|[Janthinobacterium tructae]jas|BP

MSMPPLDHAAAPDIARPLRQIRRLPGPFALPIVGNLQIKLTRIHRDVEQWVQRYGPFMR  
AWFGRTLVLVVADSEAVGAVLRDRPDGFRRLSSSVVSDMGVPGFLAEGTEWRNQRR  
MVMAGMAPGAIKAYFPALVTVAQRLQRRWHLAATQGGQ AIDL DGD LKRYTVDI IAGLAFGT  
EVNTLESGEDVIQRHMDDILPAVARRSLSMFPYWRYVKLPVDRRLDRDVAALSAAVADLV  
QQARTRMAHDPARRERPPNLL EAMIAAADLEGSGVTDRNVAGNVLTMLLAGEDTTANTVS  
WMIYLLQRHPHTLARAREEVRLAPDVARFTIEQMDSL DYL GACASEAMRLKPVAPFLPV

EALRDTVIADIAVPAGTLVWCVMRND SVADAHFPDAQVFQPERWLAEGGEANNKRASMPF  
GAGLRTCPGRYLALLEIKIAMAMLLGSFDIAGVDTPDGGEAQELMGFVMSPIGLTLRLAR  
PQ

>G3257\_04380|KEGG|CYP1097A1|[Janthinobacterium lividum]jlv|BP

MSYSFKTRARKRATVMPSFPLKQELAMPPLDHAAAPDIARPLRQIRRLPGPFALPIVGNS  
LQLKLTRIHRDVEAWVRRYGPYMRWFGR TLVLVVADSEAVGTVLRDRPDGFRRPLSSSI  
VSEEMGGIPGLFLAEGTEWRNQRRMVMAGMAPGAIKAYFPALVTVAQRLQRRWHLAATQG  
QAIDLDGDLKRYTVDI IAGLAFGTEVNTLESGEDVIQRHMDDILPAVARRSLSMFPYWRY  
VKLPVDRRLDRDVAALSAAVADLVQQARTMAHDPARREHPPNLLEAMIAAADLEGSGVT  
DRNVAGNVLTMLLAGEDTTANTISWIIYMLQCNPHTLARAREEVRRLAPDVAHFTIEQMD  
SLDYLGCASEAMRLKPVAPFLPVEALRDTVIADIAVPAGTLVWCVMRNDTVSDAHFPDA  
GTFQPERWLAESGEANNKRASMPFGAGLRTCPGRYLALLEIKIAMAMLLGSFDIAGVDTP  
DGGEAQELMGFVMSPIGLTMRLTQPQ

>Hsero\_2448|KEGG|CYP107NP3|[Herbaspirillum seropedicae]hse|BP

MAVQWSTAHCGGAWVISGHEQVAAALRDPFRFSVRRARWINSGLGGKQADSAAERRFKRL  
FSRSLFLDGRAHRRLRGVLNPGFKPAQLALQAPAIEALAQQ LIDDILRDPQSPHGFDFI  
SRFARPLPALVIARLMGLPGAVPPAFIDWAADLAAFIGSPTPDAAQTLAAQHAMAQCDF  
FSSTLEQEQQALPPHSLLAQLLQARQQGQINQVELLAQCSTLLFAGYETTRNLLGNGLL  
ALLRHPEQWRLLKSEPHWLRS AIREMLRHDS PVQYTGRRL LAPVQLDGQTLARGDLAILH  
IGLANHDAKRYHQPQDFDIRDQGMHLSFGQGPHVCLGAALTQMEAEIAFTALMRRLPTL  
ALDTAAPVWQDNPAYRALARLPVVFTRNHHA

>ACP92\_12235|KEGG|CYP107NP3|[Herbaspirillum seropedicae]hsz|BP

MAVQWSTAHCGGAWVISGHEQVAAALRDPFRFSVRRARWINSGLGGKQADSAAERRFKRL  
FSRSLFLDGRAHRRLRGVLNPGFKPAQLALQAPAIEALAQQ LIDDILRDPQSPHGFDFI

SRFARPLPALVIARLMGLPGAVPPAFIDWAADLAAFIGSPTPDAAQTLAAQHAMAQALCDF  
FSSTLEQEQQQALPPHSLLAQLLQARQQGQINQVELLAQCSTLLFAGYETTRNLLGNGLL  
ALLRHPEQWRLKSEPHWLRSAREMLRHDSVPQYTGRLLAPVQLDGQTLARGDLAILH  
IGLANHDAKRYHQPDQDFDIRRDQGMHLSFGQGPHVCLGAALTQMEAEIAFTALMRRLPTL  
ALDTAAPVWQDNPAYRALARLPVVFTRNHHA

>Hrubri\_2195|KEGG|CYP107NP2|[Herbaspirillum rubrisubalbicans]hrb|BP

MSVQWSAAHCGGAWVISGYEEVATALRDPFRFSVRRARWINSGLGQPATGAVQDAAQLRF  
KRLFSRSLFLDGRAHRRLRGVLNPGFKPADLEAQRPAITRIAQQLIDAIVADPKAHQGF  
DFIDRFARPLPALVIASLMGLPEQVPPQFIDWASDLATFIGSPTPEAQQTRAAQAAMAAL  
CDFFAQALEHPQTLPADSLMQRLQARQAQQLNQNELLAQCCTLLFAGYETTRNLLGNGL  
LALLRHPEQWTALKAEHLRGKPDRLPALREMLRYDSPVQYTGRLLADVEMGGHSLRRGE  
LAILHIGQANHDHRRFAQPQCDFDIRRDQGMHLSFGQGPHVCLGAALTQMEAEIAFTLLMQ  
RLPTLALDHHHAPPRWHSAAAYRALESLSLVF

>E2K99\_12915|KEGG|CYP107NP1|[Herbaspirillum huttiense]hhf|BP

MPLHWSTAHCGGAWVITGYEEVAAALRDPFRFSVRRARWINSGLGDTGNGQQDEAQRQFK  
RLFSRSLFLDGRAHRRLRGVLNPGFKPADLQARRGDITALAQRLADDIVTDPQAARGFD  
FIARFARPLPALVIAQLLGLPDRVPAEFIDWAADLAAFIGSPTPDATQTLAAQQAMRSLC  
DFFSQALARADELPEACLLRGLLQAHASGQLNRNELLAQCCTLLFAGYETTRNLLGNGL  
ALLQDPVQWAALKARQADPAALRMVREMLRHDSVPQYTGRLLQDVTLAGQRLQRGQLA  
ILHIGQANHDARRFRDPQRFDIRRDEGMHLSFGQGPHVCLGAALTQLEAEIAFSVLMQRL  
PTLSLADETPVWQSNAAAYRALDRLSVFF

>G5S34\_13020|KEGG|CYP107NP4|[Herbaspirillum frisingense]hfr|BP

MSVQWSAAHCGGAWLISDYEAVAAGLRDPRLSVRRGARWINSGLAGLDALDSAPAELOAQ  
RRFKRLFSRSLVLLDGRAHRRLRGVLNPGFKPTDLEAQRPAITRIAGQLIDAIVADPLAP  
QGFDVSRFARPLPALAIAGLMGLPDRVPAAFIDWAADLAAFIGSPTPDAGQTLAAQAAM  
DALCDDFFGEVVKDADTLPPDSLVARLLQAQREQRINRNEMLAQCTLLFAGYETTRNLLG  
NGLLALLQHPAQWTALKADPTLLRTALREMLRYDSPVQYTGRRLVTLQVAGRTLQOGEL

VILHIGQANHDGRRFTGPQHFDIRRDEGMHLSFGQGPHVCLGAALTLLAEIAFTALMQR  
LPTLALSATPPRRQQHAAYSALDRLPLVF

>CFU\_4256|KEGG|CYP107DG6|[Collimonas fungivorans]cfu|BP

MINEDFLNNPYPAYHALRAAGALHWSPEFCGGAWLLTGHADVSVLRDPRFSVRRAGGWA  
NSSGPQALTELREFKRIFSRSLLFVDAPQHTRLRQVMNAGFKPSALQELGPQIQEIVDRL  
LDQVLAKAAEAAPGQFTEFDFMRDFARPLPALVIAGMLGIAAADRSEFVAWSDDIAAFIG  
SPTPTLEIARAAQVSLVAMNEYFRQLLPQRRRAALGDDLMSQLIRAEASGGIITTKELLAQ  
CCTLLFAGHETTRNLLGNGMLALLQHPEQWQALQDTPALLPSALKELLRFDSPVQYTGRR  
LKVDVEMHGQRMKKGDLVIPLIGAANRDPKFTDPDRLDIQRNQGAHLSFGYGPHVCIGA  
TLTYLEAEIAMRSVMQRLPQLRLAGAAQSWGNAVYRSLNRLPLQFARPAAAHLEPAEV  
LYA

>LT85\_4854|KEGG|CYP107DG6|[Collimonas arenae]care|BP

MINEAFLNDPYPAYHALRAEGALHWSPEFCGGAWLLTGHADVSVLRDPRFSVRRAGGWA  
NSSGPGALNELREFKRIFSRSLLFVDAPQHTRLRQVMNAGFKPAALQELAPQIQIIVDRL  
LDDILSKAGTTANGQFAEFDFMHDFARPLPALVIASMLGIAAEDRSEFVAWSDDIAAFIG  
SPTPTLDIARAAQVSLIAMNDYFRQLLPQRRRAALGDDLMSQLIRAEANGGIITTKELLAQ  
CCTLLFAGHETTRNLLGNGMLALLQHPQQWQALQAAPSLPSALKELLRFDSPVQYTGRR  
LKVDVEMHGQLMKKGDLVIPLIGAANRDPKFTDPDRLDIQRNEGAHLSFGYGPHVCIGA  
TLTYLEAEIAMRSVMQRLPQLRLASATQSWGNAVYRSLNALSLSLQFSPAPAAESPVVEA  
DYA

>CPter91\_0565|KEGG|CYP1199A10|[Collimonas pratensis]cpra|BP

MKLMQAIGSDVRAALKRPVSKTVDFSGEWPRVGHVYLRDLILGEDPYRLRFLMDRILELT  
PKLTWAVIAAGAASSVRLRPEASAIKLTASASTYNDRRYAMGLYRRTAAPVCFTISTLV  
ANALWLGSPFDKDTSNRNILYEALRLLPPSWNILRSASPEYCALDSRIGPNDDVLILPLL  
SHRDPAIWDDADEFRPERWDSLNPSEQPGYLPFGHTSERCWGQHMVMPLAERLLDIIRNN  
GLAVSPRQITADVPLAGLLGVVFQVSVVRQ



>CPter91\_5329|KEGG|CYP107DG6|[Collimonas pratensis]cpra|BP

MINEAFLQDPYPAYHALRAEGALHWSPEFCGGAWLLTGHADVASVLRDPRFSVRRAGGWA  
NSSGPEALTELREFKRIFSRSLLFVDAPQHTRLRQVMNAGFKPAALQELAPQIQNIVDRL  
LDKVLADAAAPPSGQFAEFAQFAQFDFMRDFARPLPALVIASMLGIAAEDRSEFVAWSDD  
IAAFIGSPTPTLEIARAAQVSLIAMNEYFRQLLPQRRRAALGDDLMSQLIRAEATGGIITT  
KELLAQCCTLLFAGHETTRNLLGNGMLALLQHPQQWQTLQADPALLPSALKELLRFDSPV  
QYTGRRLKVDVEMHGQLMKKGDLVIPLIGAANRDPKFSEPDRLDIRRNEGAHLSFGYGP  
HVCIGATLTYLEAEIAMRSVMQRLPQLRLAGSMQSWGNAVYRSLNALPLQFAHPAAAAG  
APVVETAAKTVAEAVHA

>C9I28\_12805|KEGG|CYP1097A16|[Massilia armeniaca]masz|BP

MLGSALQLRPRTIHRTEAWSRQYGPMFRVRLGTREAVVLADAQAIGAVLRDRPDGFRRP  
GVTA EVTRELGGLPGLTLAEDDDWRRQRRMVMQAFAPGFVKAYLPRLAQVGVRLVARWRQ  
AAMAGQPIPLSADLKRYAVDVVAGLAFGADVDTVNAGTSDLQDHIDTVLAGVARRSLAPL  
PYWRWLPLPAERRLAASVTALQGAIDGFVASGRMALAADPALRARPANLLQALIAAADEP  
GSGLGDAEVAGNVATMLIAGEDTTASALAWTAWLLARHPAALCRARDEV RATVPDLARIT  
PAQADALDYVEACALEAMRLKPPAPFIPLQALRERTVLGVTLPPGTLLWCVLRHASVDAA  
LLACAAEFRPERWLPGGDATT PAARQAILPFGAGARACPGRYLALLEMKVALAALLGHFE  
LDSVTAAGGAEPAEVLGFVMAPAPLKMTLRPRVPGAGDLSAA

>C9I28\_19965|KEGG|CYP1355B1|[Massilia armeniaca]masz|BP

MPLPVTNLNPAVRPAAEGPPAARRVHELKPKKGEPVIGNMRQLDGLRFHATLENWARELGP  
LYRFTVLNRTMVVASSRPALTALMRERPD LIRRGSR TSVMEEAITPGVFSAEGEDWRQQ  
RKLVMRALTP EVVHNFFPTLAALTERLR LRWVAAAEAGR KIDVLRDLKAWTLDVTIGLAM  
GHDIDTLQNEHNPLQORDIETVFERIARRLTTPVPYWRLEFRLAVDRES DAAAQRISDAVAG  
FIANARARIAANPALRAKPSNMLEALVVARDEPGSGFTDEAVIGNAITMVFAGEDTTSNT  
IGWLLDFLVRHPDCNAAVAREADAVLGADKVLQDYRLLD SLPYLDAALREGMRLKPVAPF  
MILEPVADIVIDDTLIPAGTPIFTLLRHSFERDNTLVEPELFRPERWLAGSEPGADDPAR  
KLFPFGGGPRFCPGRYLAMAEMKIAVSMLAHQFTPVLDPGAPAVEERFTFTMTPSVLPVL

LQPRR

>DPH57\_02135|KEGG|CYP1355B1|[Massilia sp.]masy|BP

MHPAVRPAAEGPPATRRLGDLPKPKGEPVIGNMRQLDSLRFHRTLENWARELGPMYRFKV  
LNRTMVVTSSRPALTALMRERPDLIRRESRASGIMEETITPGVFSAEGENWRQQRKLVMR  
ALTPEVVHNFFPTLVMLTERLRLRWVAAAEEAGRRIDVLRDLKAWTLDVTIGLAMGHDIDT  
LQNEHNPLQRDIETVFERIARRVTTPLPYWRLFRLAVDRESDAQAQRISDAVAGFIANAR  
ARIAADPALRARPSNMLEALVVARDEPGSGFTDEAVIGNAITMVLAGEDTTSNTIGWLLD  
FLVRHPDCGA AVAREADAVLGADKVLQDYRLLD SLPYLDAALREGMRLKPVAPFMILEPV  
ADIVIDDTLIPAGTPVFTLLRHSFERDNSLVQPELFRPERWLASGESGVDDPGRKMFPFG  
GGARFCPGRYLAMAEMKIAVSMLARQFTPVLDPGAGPVEERFTFTMTPSVLPVLLQPRR

>DPH57\_08810|KEGG|CYP1097A16|[Massilia sp.]masy|BP

MPDRLIATLPGPRGLPLLGSALQLHPRTIHRTMEAWSRQYGPMFRVRLGARTAVVLADPD  
AIGSVLRDRPDGFRPAVTADV TRELGGLPGLTLAEGDDWRRQRRMVMQAFAPGFVKAYL  
PRLAQVGVRLAARWQQA AVAGGP I PLSADLKRYAVDVVAGLAFGADVDTVNAGTSDLQDH  
IDTVLAGVARRSLAPLPYWRWLPLPAERRLRASVTALQAAIDGFVASGRAAMAADPALRA  
RPTNLLQALIAAADAAGSGLGDAEVAGNVATMLMAGEDTTASALAWLAWLLARHPAALRR  
AQDEVRAKVPDLASITPAQADALDYVEACALEAMRLKPPAPFIPLQALRATEVLGVTLPP  
GTLLWCVLRHASVDDALLTCAAGFQPERWLPGGDATTAPARQAILPFGAGARACPGRYLA  
LLEMKVALVALLGQFDLDSVAAADGAEP AEVLGFMAPAPLTMVLRPRAAKRLNAA

>DPH57\_15060|KEGG|CYP229L4|[Massilia sp.]masy|BP

MTVSAPPADALAAVSHPDYPYPYAAALARQEAPFHDERLGLWVAHPGTVRVLAQADCRV  
RPPHEPVPPALAGPAGSVFGALARMNDGARHELPKAVLLEALAALPAEAVA AHVVRTADA  
LLVQGVALTTF AFELPVRAVASLLGCTDPAVAGHVRSFVAGLAARADAAAIAAAHDAVPH

LLALADDIESDAPLLRAVQEAARRHGWTDAALRANVLGLLSQTYEATAGLIGNGIVARL  
RGDARPAALVDHVLRTDPPVQNTTRRFTAADVDIAGVRIAAGQTILLVLAAAGEPFGHGR  
HACPGQALARAIHALAALQEHGPLPDVAWRYRASPNGRLEFIEGEGK

>EYF70\_23845|KEGG|CYP229L2|[Massilia albidiflava]mali|BP

MEPDHPPADAVAAVTHPDPPYPPYAMLAADPAPRYDERLRLWVAHPATVRQLLADPACRV  
RPVQEPVPAALAGPAGDLFGALVRMNDGPRHATPKAVLLHALAALPQSLAADHAASVATA  
MAAEVCDAATLNAFVQGVPRAVASLLGFADGELPRVAALVARYVACLSPLACPGEIAAG  
HEAAQALLDALRQLVRRAPGTALLAGVTREPWPDEHALLANLAGLMTQTHDATTGLLGNC  
IVARLRGDASGPAALVPAVMEHDPAIHNTRRFTAAGLDVAGVGVPAGQALLLVLAGTAGF  
GDGHHACPGQTLARSIVTQALRALRAAGPLPRAAWRYRPSVNARMPVVFVGEGBA

>EYF70\_29330|KEGG|CYP1097A15|[Massilia albidiflava]mali|BP

MPQPTPHPRAIADLPGPRGLPLLGNALQLKPATIHLMERWSREYGAMFRARIGASEVTV  
LSDSAAIMTLLRDRPDGFRPAITA EVS AELGGSVGLFLAEGDVWRDQRRMVMHAFSPTA  
IRAYFDRMVQVAQRLEARWLAAGDRDIDLNADLKRYAVDVIAGLAFGADVNTLESGGDSI  
QEHVETVLAGVARRSLLPFAYWRWCRLPADRRRLERSVRVREATDGFIAAARAAMATEPA  
LREHPANLLQAMLA AAEQPGSGVDDDAVAGNVSTMLLAGEDTTSSALAWLIWLLWQNPPA  
LERAQAEVRQHARELTVENIAALDYLDACALEAMRLKPPAPFLPLQAMRDTTVLGVHLPK  
DTLLWCVMRHDSVGDKAFFDPLRFDPERWLAGTVDKGVALPFGAGPRMCPGRYLSLMELK  
VAMAVLLGRFDIAGVRARDRSEPAEVMGFVMGPTPMAMRLRPRAE

>FCL38\_05710|KEGG|CYP226A25|[Massilia umbonata]mum|BP

MTVIKSVSLESAYSGVADNYRGEDVDLHAIYRDMRRNSPIIAENFMGR LGVPNIAGLDAN  
RPTFTVF KYKEVMAVLRDAANYTSGFIAEGLGSFFDGLILTGMGDGDAHKKARALLQPIFM  
PEVNSWRDTKMAPIVREEFLQPLVAHKKADLMDFGLLFPPIRVIIYALIGFPDNDPEKVKQ

YAAWALAILAGPQVDAEKAAQARQAAMEAAKALYDATHAAVVEVRRNGAAGDDLISRLIR  
AESDGRRFDDHEVTTTFVRSLLPAAAETTTTRTFGTMTLLLERPELLARVRADRS LVPKAI  
DEAIRLEPVATFKVRQAAQDLELAGVAIPKGAMVQCISSANRDEEAFERSEEFDIDRKP  
KPSFGFGFGPHMCIGQFIKTELQVAINGVLDLMPNVRLDPEQAPPRITGAQLRGPKHVH  
VIWD

>FCL38\_05735|KEGG|CYP226A20|[Massilia umbonata]mum|BP

MSTDSDTIDLESAYTAVSDTYKGKGDIIHAACRAARKASPIFVGDFIRQFGVPTNAGMQQG  
TRPTFALFRHQDVMVLRDASSYTSGFIAEGLGAFFDGLIILAMDGEQHRQVRALLQPAF  
MPETV NKWRDQIDAVIRKDFLEPLAGNKGADLMKFGLEFP IREMYALMGFPTDNP DAYRR  
YAGWALAMVGGNQVDPAKADEARRNAGIAVRLLYEAILEVVAQRRVDGSQGDDLIGRLLR  
AEHEGRRLDDHEVTTTFVRSLLPAAGETTTTRTFSSVMALLLTTPGLQERVRADRALVPKLI  
DEAVRFEPVATFKVRETAREVQFHGVTIPKGAFVQCMVASANRDEEVFERPDEFDIDRKP  
KPSFGFGFGPHMCIGQFVAKMELNCAVNAILDLFPGLRLDPAMPAPVIEGAQLRGAHLH  
VLWD

>FCL38\_05785|KEGG|CYP107DG7|[Massilia umbonata]mum|BP

MVRQAWPLPCQPAPPANTPLPLFDGLFLQDPYPTYRALREQGPVHWRDDVFQGAWILPHY  
ADVAFALRDPRFSSQRTGGWIKRVPDAATPAADGRGQAGRDAFQRMFARAMVFLDAPDHR  
RLRRAMAAGFHP SRIRALAPRIEQLADELFDPLQHCPQFEFIGAVARPLPSRVMALLLG  
DRSDEARFMAWSDSLATFIGALQPSADELRGARRGLMQMAGYFDGLLRERRQAPGTDLIG  
CLLQAEAAGEI HADGELVAQCAMLLFAGHETTRNLLGNAVHTLLSHPAQWRALRACPEAM  
PAAIREILRYDSPVQYTGR RVAATLT LHGHTLRGDLVLALIGAANRDPARFAAPDTFDI  
ARRESSHL SFGSGPHVCIGATLALLEAEVTLRQMARRWPDRLAESTTSWNGNPGLRGLT  
KLQLRTVG

>FCL38\_09965|KEGG|CYP152B8|[Massilia umbonata]mum|BP

MKTNAHSTAAPASRALPRDGRLDATLALKRDPYGYLRSQCERLGSDAFQTRILLQRTICI  
TGPQAAQLFYDPQRFMRKGAAPMRLQATLFGRGGVQAMDDAAHGVRKAMFMNLMTPSRIG  
ELGDLFDETWRAAMHRWAAAPRVELYAAVREVLTRAVCRWAGVPLAEAEVPLRTKQLSAL  
FDLAGAVGPWHWFSTRYARFRAQQWCGGVIERIRAGQLAVPPDSAAYAVARHVDADGRRLD  
ARTAARELLNVLRPTVAVAVYIVHEALALHAFACRPLRDDTDGRYAGWFAQEVRRFYP  
FFPAAVARVRQDFDWQGWHFPGKRRVMLDLHGTNHDPRAWQEPLRFQPERFATWNDNPFS  
FVPQGGGNAATGHRCPGEWITLELMQRAARWLAGGMGYEVPQDLALDMTRLPAIPKSGF  
MIAVHGD

>FCL38\_20285|KEGG|CYP1104B1|[Massilia umbonata]mum|BP

MSTAALKAPAPRTIADLPAPPGLPLLGNALQMKPSTVHLAMERWCRRYGPIFRARLGRYE  
TVVLADSDAIAAVLRDRPDGFRRPVITAIEVSAELGGQVGVFIAEGDAWRNQRRMVMSAFS  
PTAIRAYFERMAQVAQRLEHRWRAAGEREIDLSGDLKRYTVDVVAGLAFGADINTLDSGG  
DAIQEHVETVMAGVARRSLLPFAYWRWFKLPADRRLERSVRAVRDATDGFIAEARAAMAA  
DPTLRERPANMLQAMLAADQPGSGVDESAGVAGNVTTMLLAGEDTTASALAWLIWLLWQN  
PEALARAQREVR LHAPALTVESIGALDYLEACALEAMRLKPPAPFLPLQALRDTTVMNVH  
LPKGTLLWCALRHDSVDAGVFPEPQRFDPERWLPGGGGNRQVALPFGAGPRTCPGRYLSL  
MELKVAMAVLLGRFDIVEVRARDRIEPAEVLGFVMGPTPLAMRLRAA

>FCL38\_25475|KEGG|CYP229L3|[Massilia umbonata]mum|BP

MDTDHWPADAVAAVTHPDPYPYYTALAVDPAPRYDERLRLWVAHPGTVRELLANPDCRV  
RPVHEPVPAALAGPAGDLFGALVRMNDGARHAAPKAVLQRALAALPEEAAADVAAAVAAN  
MVADQAADKAADTAAALNAFVHGVVPVQTVAAALLGFTDGELPRVAALVARYVACLSPLASA  
SDIVAAHEAEALVDALRRLVRDGRQTALLASVAAAPWPDEHAMLANLAGLMTQTFEATA  
GLLGNCIVARLRGDASDPAVLAPAVMARDPAIHNTRRFAAGDLRIDGAHVPAQALLLV  
AGAAPFGDGRHACPGQALARI IATQALHALPASGPQAAGPVPGVTWRYRPSVNARMPVFI  
GESKR

>GO485\_20845|KEGG|CYP229L1|[Massilia flava]mfla|BP

MERNTEPGAWPADPIAAVTHPDPYPWYAHIAAEPKLVYDERLKLWVAAAPTLMREVL AHP

DCRVRPVHEPVPAAIAGPAGALFGALARMNEGPRHASPKAALLHALATLDEQAVRACADR  
VAAPLAAGVADAQTLNAYLFAAPVRTVAALLGWPDERLAQVEGWTRETFVACLSPLSSAAA  
IAASHGAADALLAALRELVRAECTNPGKRHLLAGVLAAPMPDEHTLLANLAGLLSQTIEA  
TAGLLGNCVTALLRDSAADRSTLVERVSRADPAIHNTTRYAACDVDVGGVRVTAGEGILL  
VLATADGFGHGRHACPGQALATTIVTRALLALPAGLPALGWHYRPSVNRIPVFMEAV

>GO485\_27915|KEGG|CYP1097A12|[Massilia flava]mfla|BP

MSQTFKTAAARGGTLGASQHQHEDQKMSETMSTTLPGHPAARDIADLPAPPGLPLIGNAL  
QLHPRTIHRTMEDWSRRYGTMFRRARIGSRQVVVLADGAAINAVLRDRPDGFRRPAVTAEV  
SDELGGNPGVFLAEGDAWQRQRRMVMHAFSPAARKAYFGRLAHVARREAGWLQAAAQGH  
EIDLTGDLKRYAVDVIAGLAFGADVNTIEAGDDAIGRHVDTVLAGVARRSLMPFPYWRWV  
RLPADRRRLERSVLAVRSATDGFIAAGARAALAADPGLRERPANLLQAMLVAADHPDSGVDD  
AAVAGNVTTMLLAGEDTTSSALAWLIWLLWRNPAALARATDEVRRHVPDVAALTYEQTEP  
LDYVQACALEAMRLKPPAPFLPLEALRETTVLVDVRLPPGTLLWCVMRHDSVDARCFPSPD  
TFDPERWLPDAQGAHRADRQAALPFGAGPRICPGRYLSLLEIKVAMATLLSRFDITAVHA  
TGRPEPAEVMGFVMGPSPLTMTLRPRA

>E1742\_07130|KEGG|CYP1355B1|[Massilia plicata]mpli|BP

MPPALLQPAVRLAADGPPPTRRVRLDPAPQGSPIIGNMRQLDGAYFHRTLENWARELGPL  
FRFTVLNRSMVVSSDRTALTALMRERPDILIRRGARTSAMMEEAITPGVFSAEGDDWRQQR  
KLVMRALTPEVVHNFFPTLAALTERLRLRWARAAAEGRIDVLRDLKAWTLDVTIGLAMG  
HDSDTLQQEDNPLQRDIELVFARIASRLTTPVPYWRVFRLAVDRESDAQAQRISDAVAGF  
IAIARRKMEANPALRARPSNMLEALVAARDEPGSGFTDQAVIGNAITMVFAGEDTTSENTI  
GWLLDFLVRHPEQLAGVTREADGILGTGNVVQDHRLLDNMPYLDAAIREAMRLKPVAPFM  
ILEPVADIVMDDTLIPAGMPIFTLLRHSFERENTLTNPFLFQPERWLAQGTAGADDPARK  
LFPFGGGPRFCPGRYLAMAEMKMAMSMLAHGFTPLLDPAAPPVEERFTFTMTPSVLPVLL  
RPR

>HH213\_01020|KEGG|CYP1355B2|[Duganella sp.]dug|BP

MELTPGLAPLRHIADLPGPKEARPLLGNVREVRAQPFHQVLEGWGREYGPLYRFRIMRKQM

LATADREMIVALLRDRPDMMRRSSRTAEMLNEIGTRGLFTAEGEDWRRQRKLVMRALTPE  
VIHHFFPMLAAMTDRLRLRWESALAAGQPVDLLRDLKAYTLDVTIGLAMGQDINTLELEE  
HPLQRDIEFLFKLVARRLTTPFAYWRVPVLKRAQDHEAIAASARIQQAIFGFIADARKRL  
AENPARRLKPGNLLLEALIVARDEPDSGFTDEAVVGNAITMVFAGEDTTSNTAAWLIDFLA  
DHPAAAATMAQEAQQVLGERAVLADYHLLDQLKYIDAATREAMRLKPVAPFMAAEPNQDV  
VLGDLVVPAGTVIFLLLRHASERECELPQPERFLPERWLDGAAAHGDDPGRKLLPFGGGP  
RFCPGRYLAMAEIKMVMSMLVRHFALERVVGAPAAARECFTFTMTPDSLPVRLARKT

>HH213\_03910|KEGG|CYP1097A19|[Duganella sp.]dug|BP

MYNTIAAELRHIADLPGPRPWPLAGNLPQITPTRLHQDLEGWAKQYGPLFKISFGRTQML  
VVSSHELNVNAVLRDRPDGFRRPSITATVSDMGGRPGFLAEGTAWRDQRRMVM TALAPH  
AVKAYFPSLVAVGLRLQQHWQRAAREGRVIDLTEDLKRFSDVIAGLAFGSDVNTIDGGE  
DVIQRHMDIVLPAVARRSMALFPYWRYVRLPQDRQLDASLLALNQSIDGLITITARARLAA  
EPERRVRPANLLEAMICAADEGGSGVDDVAVAGNVATMLLAGEDTTSNTLAWMLYLLQQN  
PAAMQKAREEVLRVAPDPRAFTIEQMDGLDYLDACAQEAMRLKPVAPFIPMEALRDSVVG  
DVQVPKGS LVWCVMRND SVSNDFVADAADFHPERWLAGAAQPMNKQVSMPFGAGVRTCPG  
RYLALLEIKLASAMLLSSFDIASIGTASGAEPQELDGF TMSPIGLQMRL

>EJN92\_09775|KEGG|CYP229M2|[Undibacterium parvum]upv|BP

MFPSNPVAAVCHSDPYPPYRSLRVGPALQFDTELKLWVASSAAVVRQVLEHPACVVRPAG  
EPVPLAIAATSAGQVFGRLVRMNEGRAHSTPKLVLAQALASLTPEQIAARTSYFSNLLAQ  
QHGLPTAAGINAWMFELPVYVVADLLGFAETELSQLAIWMGDFVRCLSPLSRAEQLASAG  
LAAQSL LARFGELLAATSTSENSLVSR IQQAARQVGWQNQDAILANLIGLLSQTYEATAG  
LIANSLVALLSQNGLQQQMRDTPEQIAAMLQEVCRYDPPVQNTRRFVVQTCSIAGVELQP  
GDAILLVLAASRDESDFPNADEFSLDRPAHTLLGFSGRHLCPGQTLALGIGTAALQSL  
LALTIGLDPTQLQW TYRPSLNGRLPLFQQISPTLTESH

>EJN92\_11585|KEGG|CYP1097A13|[Undibacterium parvum]upv|BP

MHSAANAAPSATTAPAAPVTLRSYEDLPGPRAVALFGNALQIDMPQAHLQFEEWCREYGA

LFKVRMGSRKLLVVGHEHELI AKILRDRPDGFGRS DRLQEMWHEMGLPGGVFSTNGEVWKR  
QRRMVLSSFDPAHVKNYFPALQGV AQRLCGRWQKAAAAGQAIDLQADLMRFTVDTIAGLA  
FGAEVNTLES DQDVIQQHLDKIFPALFSRIFAVIPVWRIRRSASDKQLEKSVREVMLAVD  
GFVAQARARMQADAGLHQHPTN LLEAMIAAADQPD SGIDDSQVAGNVLTMLLAGEDTTAN  
TLAWMIHLLWLN PATLALATAEVR RVCVGSSVPTLEQLS QLDYVEACAHETMRLKPVAPQ  
IPQQAHKDTVVG DVMVPAGTMVICLMRTDSVSDAHIAQADRFAPERWLGQGELAHSSSSA  
KRIAMPFGAGPRICPGRYLALLEMKMAMA ILLLNFEIQNVSTPDGQPARELLKFTMTVPV  
LKMQLAARQL

>EJG51\_012640|KEGG|CYP229M3|[Undibacterium piscinae]upi|BP

MFPSNPVTAVCHPD PYPYRSLLAGPGLQFDEGLKLWVASSAAVVRQVLEHADCLVRPLA  
EPVPRAIVGSSAGQVFAYLVRMNEGSAHAVPKLALQQTLAALD PARIGARASYFSALLAP  
RHGVPTAAGLNAWMFDLPVYVVGDLLGF AEAGLPQLALWMGDFVRCLSP L SDESQ LAAAS  
VAAQALLARFAEL LAAAVPTVDSLLSRLQQAAQQAGWQHALLANLIGLLSQT YEATAGLI  
GNSLVALLSQPDLQQQMRLAPEQTAALLEEVCRYDPPVQNTRRFVANACCIAGVALQPGD  
VILLVLAAAGRDDQAHPNANQFVLDRPARQLFGFGHGRHLC PGQQLAASIVNAALQSLLA  
LPLSLDPAQLQWSYRRSLNGRLPLFPVCH

>FAY22\_07660|KEGG|CYP289A26|[Noviherbaspirillum sp.]nok|BP

MNKEMPQDDWDPRSEAVLDDQIASYDEMRRGCPVAHSEYLHWSLFRHEDVVRALHDHRTF  
SNAASSHPSVPNGMDPPQHTLYRRVIEPYFSAQRMHAFEPVCRNIAVSLVDDLPAEGEIE  
LMASF AE EFALQAQSAFLGWPAQLNEPLRRWTRKNHAATLARDRKAMEEVAFEFDGYIRA  
LLAQRRADR DGTPTDITACLLRERVADRLLNDEEIIISILRNWTVGELSTMSASVGILAHY  
LAARPALQEQLRGQPSLLPAAIDEILRIHAPLIANRRITTSEVDVGGRR LAAGERVTLMW  
ASANRDEAVFGDPDEFRLDRDPSKNLLYGAGIHVCPGAPLARMELRVILEELLRGRRLE  
LVPGKAPVNAVYPASGFAALPLRITS

>JQN73\_09080|KEGG|CYP107DG8|[Glaciimonas sp.]glc|BP

MINNGFLNNPYPTYEALRQAGPLHWNEEFCGGAWLVTEYADVASVLRDPRFSVRRAGGWA



NTSGPEALAELEFKRIFSRSLLFVDPPQHTRLRQVMNVGFKPAALQALAPRIQTLVDGL  
LEGVMTTTAASFDFMRDFARPLPALVIAAMLGIDGDDRAEFVAWSDDIADFIGSPTPTME  
IARRAQISLIAMNDYFRAILPQRRSHPGEDLISQLTLAEASGGIITTKELLAQCCTLLFA  
GHETTRNLLGNGVLALLQHPEQWQMLQONTALLPSALKELLRFDSPVQYTGRRLKVDVEL  
HGQRMKKGDLVIPLIGSANRDPKFTTPDALDITRNQGTHLSFGFGPHVCIGATLT YMEA  
EIALRSVMQRLPGLQLAGDTPSWGHNAVYRSLNALPLSYAAALTTSRLEDAVHV

>Lcho\_3645|KEGG|CYP107DG10|[Leptothrix cholodnii]lch|BP

MSAVLRPVGQPLGRPIVDAAFLADPYPTYAALREAGPMHWSDEFFGGAWVLTRHADVDAV  
LRDDARFSAQRTGGWVMGSDDTTSPDALNSRAELQDFQRLFARAMLFIDAPDHRRLRGVM  
NAGFRGDQLERLRPGIERWIDQRFDAIDAKGQAGSGFDFMAQIARPMQAQVIATLMGITE  
ADRGDFIAWSDDLADFIGAPMPTRELTRRARISLLAMARYFEQLTAQRRRQPGDDLVSRL  
VQGEARGQIQPGAEMLAQCAMLLFAGHETTRNLLGNGLHALLAEPGHWQRLQDEPALLPG  
AVRELLRHESPVQYTGRRVATDLVLHGQLLRGDLVVGLIGSANRDPARYEQPDRLDLAR  
RAAPSLSFAGAPHVCIGASLTLMEAQILFSRALQRWPGQLVDATPRWNGNPVYRGLQSL  
RVIAPATPD

>THI\_2350|KEGG|CYP107DG9|[Thiomonas arsenitoxydans]thi|BP

MNEVSIRPPCVLGRSIVDRAFLADPYPTYRALREAGPLHWSEEFFGGAWLLTRHQDVETV  
LRDARFSAKRTGGWVNDLEHERGELSRFQRLFGRALLFLDSPDHSRLRNLMQSAFRPDAL  
TRLRPEIERIADELDSLNGVGPFDFAQVARPLPVRVISHILGIVGADTEEVTIWSDDL  
ADFIGAPTPTREQACRAQSLLAMTRFLQDQLETKRTARGDDL SALLLQRERGTLHDDA  
ELLAQCAMLLFAGHETTRNLLGNGMQALLSHTEQWQLLVKDPNLVPDAVREILRYDSPVQ  
YTGRRVISDLLFHGQLLRGELVLPLIGAANRDPARHADPEELDVRRTDRGTL SFSGSPH  
VCLGAALTRIEADVVRQMLARWPDRLASAEFQWFANPAYRGLKTL SLRPAM

>RGE\_22720|KEGG|CYP152AR3|[Rubrivivax gelatinosus]rge|BP

MPHVLPPLATRATPAPLPRLPGFDHTLAWLADPYRFIARGCATLGADV FQIRLLMRPTIC  
MSGPLAAELFYDESRFVRAGAAPEPMQATLFGHGGVQTLGDGDAHRVRKALLVGLTGADSV  
QTLVSIVGEEWDRAAAGWAATPQPVTLYREVQPLLARAACRWAGVPLPEADVARRTRQLV

ALFDEAAAGPIAHLQARWARSRAEAWLTALVEHARAGRTALPPGCAAQAIVAYRDLDDGRP  
LPAHTAAVELLNLLRPVAVSVWISFVAHALQRFPAWRATLASPDGENLAPAFIDEIRRH  
YPFFPAIVARVRTDFDWCGLHFPAGRRVLLDVFGTHHDARIWRT PQSFLPERWLRRQPGP  
YEFLAQGGGDVAGGHRCPGEDLAAQLMRLALGRLLHMRVIVPPQVMALKMSRLPAVPVDG  
IRLRVLDPG

>A4W93\_27770|KEGG|CYP212B4|[Rhizobacter gummiphilus]rgu|BP

MAELQRDYLGFSTSQLRAQYGDLSYARVAFEHAYDVFSPELVRELLVANADGLKRWERGLE  
VFEQLMGQSVLVTEGEVWQRQRRMLQPGFSPPRVAGYAALMSDAAAKGLDAALPAASPAG  
QVDMDLFTGLAMDVILRTLFSSEASEESARAVGAVQVASEFAFREMFPMTLPDWLPLP  
GKAAKRRALRTLRLDLVDGHIARRRVAGAAEHDDLGMLLSAREETTGEGLSAQEV RDQCM  
VTFQAGHETTATALLWWSRLIAGDAEAELEGARREVDEV LQGETPSAADMARLPWLTATLK  
EAMRLYPVPALMSRRTTREIQLGEWRIPKGALVRVTPWVIQRDGRSFEHPDRFLPQRFA  
APDDKAPRGAWLPFGTGPRVCIGQHFAMLEMTVIAAMLLQRYQLGLPQGAPACEPVMHVT  
LRPRNGVTNLNRRRGPARTERP

>DEH84\_02665|KEGG|CYP152AR1|[Aquabacterium olei]aon|BP

MRPASNPPTLPAGTGIPKLTAWDSTLAWRADPYRFLGRQAALLGSDVFEARLLLQPTLCL  
TGPQAARLFYDDSLFQRQGAAPPALVSTLFGQGGVQGLDHARHRHRKALFMAITAPERLQ  
RLIELVRREWLASLHDWILSPFFSLYRALQPV LARAVCQWAGVPLADDDLPRRTAQLVAL  
FEDAAAGPVAHLHARWARRQAEAWLTPLIAAARTGHTRLPTDTAAHAISTHRDLEGHLLP  
PRVAAVELLNVL RPTVAVSVYMTLLAHALHTHPVWKSRLAGAASGPDAMGFVQEVRRHYP  
FFPVAARVRADFDWQGLHFEAGRRA LFDLYGTNHDPRS WPGPDTFSPERWARQAASAAF  
VPHGGGDPHLQHRCPEGDLTARLMLLALDILLHVMRFDVPVQRLALNMRRLPALPRAGFV  
IERVRRIA

>EWH46\_11610|KEGG|CYP107NN1|[Sphaerotilus natans subsp. Sulfidivorans]snn|BP

MSAVVLQPGAADPHPAYAALRQAGPIHWS EDDFFGGAWVLTRHADAEQVLRDPRFSAARTG  
GWVRRGETQRREAGAFQRLFARALLFLDGQDHAGLRRLMMAGFDGQAMAALRPWIEQRCT  
ALMDTLQAEQAAAPERPV DWIAGVARRLPAGVISRLLGLPAEDEPMLVGWSDEIAPFLGA

ADPSPEVTRRAERALVAMAGYFRSHFARSPGAAAQEPAGLLERLLL AHRQQAGLDDSVG  
LLAQATMLLFAGHETTRHLLGNAVQLLLTHPVQWQALRADPGLAPA AVREALRHQCPVQY  
SGRRVVTPLELHGQRLERGDGVIVLIGAANRDPERFERPDDFDIALPRRASLAFGSGPHV  
CIGAALTRLEGEIMLGQLARRWPHLALARPETPDWVPDQPLYRGLRSLPLWLQGPPT

>EWH46\_13000|KEGG|CYP1098B5|[Sphaerotilus natans subsp. Sulfidivorans]snn|BP

MARFCPAYPTPRRNKASGLLMFLSARHSWLDALYERSYRMQMGEVRLPGLDLYMVNEPGL  
VRRVMVEQAEDFPKSELLGQALEPLLGESIFTTSGEQWRRQRAMMDPAFAQARLQVAFPV  
MAAATEAMLARLAQLAEGTEHDIEVEMTHVTADIIFRTIFSVPMEGADARRVFD AFARYQ  
ALVPRLILPSIFGLRWLVWPDAWRARRAAREIRGLLET LIRPRFEARRTGA EHPQADIL  
AAFLDARDEQGRAFGFEELVDQVAMLFLAGHETSASALTWACHLLARAPDIQQRVHDEVA  
TQLGARAPGTADMKGLTLTRNVFRET LRLFPFVGFMARQARTGCPMRGKQVKAGATVVIS  
PWLIQRQREGWHD PDADFDPDRHARDEEGSTGHGRAGYLPFGMGPRVCLGA AFALQEATLI  
LAQLVRRWRLEAVEGHEPRPVGRLTIRSANGVRLRLHRRAEAAAAG

>LRM40\_02785|KEGG|CYP1098B7|[Ideonella dechloratans]idc|BP

MSRFCPHYPRPAARRPSVWRMFFSKRRSWLDGLYERSYRMKMGEVHLP GVDLYMVNEPAL  
VHQVMDHADAFPKHEMLGEALRPLLGDSIFTTNGEVWQRQRTLMNPSFEGARVRKVLGRM  
RAAGDAMVQRLHAVPPGGVHDVEMEMTHVAADIILRTILSQSLDSEGAQRIFA AFARYQA  
LAPRLMMPAFFGLRWLRPWWQIRRSRSAAREIRSLLEAYIRPRYEAA RAGGPADETAEDD  
ILASLLRVRDEATGEGFGFDELVDQVAMLFLAGHETSASALSWALHLLA HDPQVQERLHE  
EACRVLPGLDTEGANAIKDLTLARDVFRET LRLFPFVGFLARQSAQACPMRDKTV PAGGS  
VVVSPWLIQRHRELWARPDEFDPDRYSRDQPSMAEPLDEPAARES LRQAYLPFGMGPRIC  
IGAAFALQEAA LILALVARHVRVEPVPGETPEPVGRLTIRAENGIRLKIFPREAG

>E10\_09790|KEGG|CYP107NQ1|[Burkholderiales bacterium]bbag|BP

MFTRYDEVA AVL RDPNCSAARAGAWNVVGP DARREFRALKAVLARTMV FADGRRHRRLR  
QVVAHGFRRAALEAMLPSIRAAVEDGIAALLAAEARDGEADFMAQFARPLPVRVIAGMLG  
VPFEDALGLVASSDAIARFIGEPAPSAAAAARAAEDGAQELVGYFERVLRQADRDGTPPDP

AGGGLFAILVDAHAAGRLSTRELIVQGAMLLFAGHETTRNLLGNGIQALLRHPDEWRRLA  
ESPARARAAVFEVLRYDSPVQYTGRRVIRDCTVAGRRLRRGDLVIAHLAAANRDPEKFPD  
PDVFRVDRHGEATPLSFGWGPVCIGAELSVLEAWTAFALRQRLPGLARIEEAPTRIDN  
AVYRGLARLRVRCGASADGTAVIPGNACPV

>AAW51\_1491|KEGG|CYP229N1|[Polyangium brachysporum]pbh|BP

MDEIRDVPVQAVTAPDPYPYAAALRERHGLYHEPRLDAWVATAAAVVDAALQHPGLRVRRP  
GQPVPPALQGTAPAGVYARLVRMSEGPAGHAGTRRAVTQTLDPMASGQVAGRARDHAAQAL  
AMTAPGDRERLRALYRVPLLTMAEGIGVPIGQRRERVALLTERFVACLSPLSGAPALSEAQ  
DAVHALHGLFDEGLSSWAPAPPSGGPERETWIANLIGLLSQTCDATAGLIGNTLVALGRE  
PALVSRLRQGIVQVAEVVDEVARHDPPIQNTRRYAAEPLTLAGHALEAGQCVLLLLASAN  
RDPAPCGTVAIDPAPDVFAFGRPPCRSFGYGAGHHRCPGDRLASAIAGGVVQALLAAQAS  
LLDGLAQRLLASGAYRASVNARIPCFP

>AAW51\_3718|KEGG|CYP152B9|[Polyangium brachysporum]pbh|BP

MPSESQLDSTIALLANPYSFITERCNRHGSELFTARIMLQPTICMSGPRAAQLFYDARRE  
TRVSAAPEPLRATLFGDGGVQTLDGEPHKIRKGLFMAVLGPDRVAALADRCAQEWHRAE  
AWARQGGQVVLYPALHTLLTAAVCDWAGVPVPPDELPTRAEQTLALFDRAAAKGAGHLQS  
RRARKHAEDWISGLIEDIRGGRLETPPDSAAARVAQHRDADGSLMPPRVAAVELLNVLRP  
TVAVSVFIVQAAHALHVYPECRLPLQKAEPGYADAFVDEVRRYYPFFPAVVARVRDDFEW  
EGYHFPKGRRVMDLHGTNRDPRAWRDPDVFRPERFRDTPPGLYNFIPQGGDVAATHHRC  
PGEGVAKALTKVALDFLVQRLRYRVPEQDLRLNLKRLPCIPHDGFVIEAVELLA

>NAL212\_2776|KEGG|CYP1138A1|[Nitrosomonas sp.]nit|BP

MSTNYLERYDATADVEKFPLVRRWMDTEPLPFFKELRAKRPILVTPDCTLVTRFDDVREI  
LTMYKVFTVKPYVPKMDNYLMAHDDDALHTREKSLMQFMLNRDDLPRVRNMIADIAKGIL  
SNANGQIEVVNSFCRMVPATLVQKYFGLTGAKREDLIEWSYWNQYDTFHNQPFDLVPPEL  
SQRIIDRHNETSKKLSDYITMLIAKRLAVKIEKLTFTSTIVRLQDDIVTRMLRTSFAKEL  
DFDIKRLGINAGLLIGAIETTAQAVAQVLQYLFQHSEWMEKAKAVAQKDDPTEFDGIVW

EALRFVPITPYLFRTTVSDYTAAKGTDHETILRAGTYVLPVTLSATFDERAFELPEEFIP  
QRNWYNYFHFHFGDHECLGRYVGMVMIPEMVRQVFLQKNIEPKGNIIDYKSGPFPESYMLS  
WNTQ

>Nit79A3\_0628|KEGG|CYP1138A1|[Nitrosomonas sp.]nii|BP

MNTSTSYLEQYDATADA EK FPLVRRWMDTEPLPFFKELRAKRPILVTPDCTLVTRFDDVR  
EILTMYKVFTVKPYVPKMDNYLMAHDDDALHTREKSLMQFMLNRDDLPRVRNMVADIAGG  
ILGQANGKIEIVNNFCRMVPATLVQKYFGLTGAKSED LIEWSYWNQYDTFHNQPFDLLPP  
ELSQR I IDRHNETS KKLGSFITMLIAKRL LAVKAEKLTFS TI I KLQDDIVTRMLRTSFAK  
ELDFDIKRLGVNAGGLLIGAIETTSQAVAQVLQYLFQHAEWLVKAKAAAQKEDPSELDGI  
VWEALRFVPITPYLFRTTVSDYTAAKGT DYETVLRAGTHVLPVTLSATFDERAFD SPEDF  
IPQRNWYNYFHFHFGSHECLGRYVGMVMIPEMVRQVMLRKDVEPKGNIIDYKSGPFPESYD  
LSWTTQ

>AAW31\_11620|KEGG|CYP1225A8|[Nitrosomonas communis]nco|BP

MIANPLQAFYGWQQNYGDLVSFRLAARQFYLF SHPKLVEQALIRQSDVFVKTYNPEKPTG  
LALILGQGLVTSQGDLWQRQRRLMQPVFQRSNVTTLLPQMATAGNNMLARWRQLGEGAQV  
NLSGEMMRLTLEVITQTMFSTSVLDKIEQIAPSLEILLRYAAKTIANPLTLPLYVPTPAN  
RKFKQALEIIDNVIYGMIDQRRTAPSGQNDLLDMLLKARDDNNGEKMTDRQVRDEVITIF  
SAGHETTANLLSWTLYLLVRHPGALARLREELDRLLQGKIPNAADLQQLVYTRAVLSESM  
RLRPPASFLLRKVSKDTEVDDYFLKAGRLAIFSI FNLHHHADFWPQPEQFDPERFLVSQN  
RRYSFIPFGTGERICIGSHFALMESQLLLCMI IQHCDLQLLDPDEVEIEMAITLRPKGGI  
PACINWR

>Nm1\_A2167|KEGG|CYP1225A8|[Nitrosospira multiformis]nmu|BP

MAHNKTVPQVKGEFLLGNLRQMIASPLQAFYDWQQNYGDLVSFRLAARQFYLF SHPKLVE  
QALIRQSDVFVKIYNPEKPTGLALILGQGLVTSQGDLWQRQRRLMQPVFQRSNVTTLLPQ  
MVTAGNNMLGRWRQMGEGAQINLSGEMMRLTLEVITQTMFSTSVLDKIERIAPSLEILLR  
YAARTIANPLTLPVYVPTPANRKFKQALGIIDDVIYGIIDQRRRAAPSDQNDLLDMLLKVR  
DDDSGEKMTDRQVRDEVITIFSAGHETTANLLSWTLYLLVRHPGVLTRLREELDRVLQ GK

IPNAEDLQQLVYTRAVLSESMRLRPPASFLLRKVSKDTEVDGYFLKAGKLAIIFSIFNLHH  
HADFWPQPEQFDPERFLLSQNRRYSFIPFGTGERICIGSHFALMESQLLLCMIIQHCDLQ  
LLDSKEVEMEMAITLRPKGIPVRINWR

>EBAPG3\_004825|KEGG|CYP1138A4|[Nitrosospira lacus]nlc|BP

MSASHYLEQYDAAADADKSPLARRWIDTEPLPFFKELREKRPILITPKFTLVTRFDDVRE  
VLSMPKVFTVKPYVPKMADYLMHDDDALHTREKSLMQCMLNRDDLPAVREMVANVSKEI  
LDTANGNVELVNNYCRMVPATLVREYFGLTGAKRSDLIEWSYWNQWDTFHNQPFDLLPPE  
KSQQIIDRHDETSKALGMFIFELIARRTLQVKAEQITLSTLVRLDDDIVTRMLRTDYPKQ  
LDFDIKRLGLNAGGLLIGAIETTSQAVAQIIQYMLHPEWLEKAKAAAQKDTPAEFDGIV  
WEALRFVPITPYLFRTTASDYTAAKGTGYATVLRAGTYVLPVTL SAMFDERAFESPDEFI  
PQRNWNYNFHFHFGFSHECLGRYVGMVMIPEMVRQVLRQDIKANAPIDYKSGPFPEQYDL  
SWT

>BSY238\_2437|KEGG|CYP1246A|[Methyloversatilis sp.]metr|BP

MTAFAPAGIDARPTYIPPRPQALSPIISLFRLIAQG DGDLLSLLPADAYRVPVGH LGYSRR  
QILIVNDPQLYRNILTDPTDIYPKNDLMVGALEPLVGNSIFVSSGDTWRKQRRMIDPAFS  
HMRLGQAFPSMAAGVDAYEDKLREHALTGEAFSLDLAMSHLTADIICRTVFSTSF DTRAS  
REVFDAFTL FERSVAQVEWKRLIFDPAWQRVDQRPDVEAACHIIRERLGELVDTHLTGPI  
TRWNDIAAEMVNAEDPETGYRFDRKELIDQLGVMFLAGHETTASVLTWVFFILSSQHDTV  
ARMRAEVD AVVGEGDIGFEHIRRLTFTRNVFRETMRLYPPI TFIPRVAAEATQIGKYRVK  
RGAMIMISPWTIHRNENYWRNAHHFDPDRFSTEREHELVP GAYLPFGLGPRVCVGA AFAT  
TEATLILARLVRRFDFSALDADAVRPVARLTTRPKHQIMCRVRLRERAGT

>DENOEST\_2817|KEGG|CYP2733B1|[Denitratisoma oestradiolicum]doe|BP

MKDAPQNTDYLD RPDNTRL SHLPGDYGLPFLGCMIPLVNNPSALIGSY YERYGPVCRTQT

TGQKMVWALGPDYNRDITVDSQQLFSAHMGYDGMLRDFEFAGGLLMKDFGEHHFHRRIMQT  
AFKTESLKQHLLVQINERVSRLPTWSSRPDFHFYPTIKTLLLLDIGAKVFIGLEMGNEAHR  
LNQAFLDMMEGVLSIIRRDWPGLLYRRAMNGRRSLERYFLELTPQKRTSTANDMMSHFAR  
ERDEDGQYPYDPTVVRDHILFLLLAHDTTTSALTMAAYYLARNPEWQERLRQEAVGTGGE  
APEYNTIKGGLPLIEQTFHEILRLHPPVPQLMRRTVQDTELGGYEIPADTLVAISPSFTH  
RMKEYWREPDNFDPDPRFGPERLEHKAHPYLWVPFGGGAHKCIGMHFADILFKCVMHDMRLR  
RYRWTLPDGYPTNPAIMHFPPFSKLDNLPLRLEPLH

>DENOEST\_3328|KEGG|CYP108AB1|[Denitratisoma oestradiolicum]doe|BP

MAVPILPSEIDISSPEAYLNERRLQADFSRLRNEMPIAWVDREPYRPFWSVVRNADIKAI  
EKNHQIFINEPRLTLQTRKAEAAASAAMFGGQRYGVRTLTDMDPEPDHRKYRDISSRWFVGP  
GLRKVLERVDRIADRFVDRMVKQGGQCDFATEVAMWYPLYVILSLFDLPEEDAPRLLQLT  
QHLVSASDPDLQRSDLGGTDAVPEFFEYLGRLIVERRAHPGDDLASAIATAEIDGKPIDT  
LEALSYYLIMVTAGHDTTSGAITGGMHALVENPAEREKLRQPTPALLRNASGEMCRWVTP  
VKHFMRTATEDFSFHDAIKAGDAVALFYASGNRDDACFEDPDPRFRVDRKVDGHVAFGFG  
IHSCVGRQLALAEMDAFFGRLIPRLRHVEFAGDPKLIQSNLIGGYKSLPLHYEITH

>Mfla\_1442|KEGG|CYP152S1|[Methylobacillus flagellates]mfa|BP

MARPPLESTYALWKKGYVFIDSTCRALGVKAFRTRLMMRPAICMQGEAAARLFYDNEKFM  
RAGAMPARAKKTLVGEAGGVQGMGDGHAHRHRKQMFTRELMSPERIEHLVCLHRGHWKEAIQ  
AWKPGSEIVLFREAQKLLCKSVCAWAGVPLTGHELDRRAREFGHMIDSGAKLGPHHWGRGR  
WARKSCERWLGQLIEDIRHYGEQGQAGSILQSIAWHRDEHGQRLPLQVAAVELINILRPT  
VAIAQLAVFCALALHSFPACRQKLQQGDEDYLGWFVLEVRRFYPPFPFLAAVVREDFRWQ  
NLEFKRGQRVLLDIYGTHRDPALWQDPAQFIPERFKDWDGNSFGLIANGGATYEYHHRCP  
GEWITIALMKAITRMLVHEIEYTVPAQDLRLDLSRIPALPESGFIIQPVITPRYLEKKHA  
NS

>BN1209\_1156|KEGG|CYP2159A1|[Candidatus Methylopumilus turicensis]mbac|BP

MVSLTQELLYSFDELNKKLIADPYPFYDELLCHDGPIYAIDEKNPDQKTLLLTRYDDVLK

VLSLAKEISNDKNYLTP EKPRNYGDSFILNTDGVEHATLRKIFVSFFCKSRLENVRIFLN  
KYLPSLIQSLEIHDEIDL NKHVAESIPLAVMGHLMGIDNMADLRNLRVWTLLEMSLADEF  
TNQSDFAIQAEKNQA AKSMSDFCKSLILQKSNNTSDDLVSFIVDECSKQKIDEKKILENV  
IFMMIASHDTSVNMIANGLFLLLSHPKELHKLALNP ELADDATEEILRFESPLQRATYRV  
TKSEINLDYFKIPSDTKVMLFLGAANRDP RH FESPDEFIISKKTPNLTFGHGIHNCIGK  
ALARLEGALAFPALTPYLINVKLKSAKPTWRNNTLFRIPETLIVTKR

>ACJ67\_12780|KEGG|CYP152S2|[Methylophilus sp.]meu|BP

MALAALPQDTAFDSTLSLIRKGYRFISDTCRALD TDVFETRLLFRSVICMRGAEAA RIFY  
DPDKFLRHGAMPTRAQKTLVGVGGVQSLDGA AHRHRKHLFISHLMNHERINALAELHRMH  
WHSTLALWPIHEEMVLFEHAQNTLCRSVCAWAGVPLPPSECSRRAKEFGRMIDSGARLGW  
HHWRGRMARSSSEKWLMAEIEKIRSSKQE AATSILQAFAWHRDEHGDLLPCHTA AVELIN  
VLRPTVAIAQLVALSALAIHQYPHVREKLLNQHSEYLDWFILEVRRFYPPFFFLAAYARE  
DFNWKGWHF KKGTLTLLDIYGNNDGRHWEQPD EFKPERFKNWSQDEYSFIANGGATYAE  
HHRCPGEWITNRLMKVALKLLVQNLRYTVPKQDLSVSLARIPTLPKSGMI IAPLSYSAS

>ZMTM\_05240|KEGG|CYP2743A1|[Methylo radius palustris]mpau|BP  
MNIQPHQLTPHFHSQAFQENLYTNYRQYLEFTPVFRSAENV IYLTRYEDCIKLLSSENFK  
RIAPSGGSNPLNQLSNEQTPLEMMITSWMLFMDP PRHDLVRKAFSPFFLVGALKQLEPFI  
REQLQSLFASMPRSGEVEILDALAFPLPVIVITEILGV PKSDIEMFRLWSLELTKALDSG  
NDLEIRNGTAAALQLKAYFTDLLKRPKFL LGHGLINTILNSNEYSLTVDELLYGAI FILW  
AGHETTKNLISSGFHTLSQYPEVVRDLQAHPV LIEAAIEEMLRYETPVQKISRWAHSHEQ  
FGEYVVPKSTLV TALLGAANRDGAIFEQPDVFDLRKKNRHIAFGTG IHHCLGALLARME  
GRIVFGELIPQLVKLEPVSHEWRIYSAFRSLDSLRLDV KFK

>eba473|KEGG|CYP1157D2|[Aromatoleum aromaticum]eba|BP

MPVVFDWTGGDLGSIAQCIGVLVHYLATHPAVQDYLRSGVPDAEIDAIIDEILRIDDPFV  
SNRRVTTC PVTIGGAELPQGARVKLNWTSANRDEAVFGDPDAMPERNADRNLVYGIGRH  
ACPGRL LATLEMRIAMQELLAATSSIALDSQRPAERAVSPVGGWAMVPIVLA



>ebA475|KEGG|CYP1157D1|[Aromatoleum aromaticum]eba|BP

MTDHMPDDL SATGRDLRAYTDEL RPRHGVVRNAQGEWVLLRH ELVVQAALSDDRFSSAVS  
SHLHVPNGMDSAEHTAYREAVDGF LTPEALAPFRERFR RVATGLAASLPRGVAVD AVSQV  
GVRFAVRAQSAWLGW PADLEDRLVDWVAENHAATRSGDRSWTQRVAESFDDLIRSVLEPR  
RGAAHEDGADDVTARLMRTEVNGRPLTDAEIVSVLRNSVMR

>ToN1\_06480|KEGG|CYP226A23|[Aromatoleum petrolei]apet|BP

MSSVKDVTLES AFAGVADNYRGEDVDLHAIYREMRKNSPIIAENFMGKLGVPNIAGLDPN  
RPTYTVFKYKDVM TVLRDAANYTSGFIAEGLGAFFDGLI LTGMDGEAHKKARGLLQPIFM  
PDVVNTWRDSKMDPIVRNEYLLPLVPKKKADLMDFGLHFP IRLIYALIGFPDDEPEKVEQ  
YAAWALAILAGPQVDAEKA AIARKAAMEAAQALYDAVKEAVVAVRQRGAEGNDLISRLIR  
AEYEGRKLDDHEITTFVRSLLPAAGETTTTRTFGSLMVLL LERPDVLDVRVKDRSLVGKAI  
DEAIRFEPVATFKVRQAAQDLELGGVRIPKGAMVQCI VSSANRDEEAFESSEEFDIDRKL  
KPSFGFGFGPHMCIGQFI AKTELQVALNAILDLFPNIRL DPDEPKPRITGAQLRGPHSVP  
VIWD

>ToN1\_06580|KEGG|CYP226A21|[Aromatoleum petrolei]apet|BP

MSTDILNLDLETAYTAVSETYKKGDIHAACREMRGKSPIYVGDFIKQFGVPTNAGLKQG  
TRPTFALFGYKDVMNVLRDADTYTNGFIAEGLGAFFDGLI ILAMDGEQHRRVRALLQPAF  
MPD TVNKWRGQIDHVIRKDFLEPMVSQRKADLMDFGLYFP IREMYALMGFPTDDTEKYKK  
YAAWTLAMVGGNQVDPEKIDEARRNAGVAVKLLYDAIQEVVVKRRAEGSHGDDIIGRLLR  
AEYEGERLDDHQVITFVRSLLPAAGETTTTRTFSSVMTLLL TTPGLVDRVRADRS LVPKLI  
DEAVRYEPVATFKVRETAKEVELHGVTIPKGSFVQCMVVSANRDEEVFENPDQFDIDRKL  
KPSFGFGFGPHMCIGQFVAKVELNCAINAILDLFPNLRLDPDKPAPVIEGAQLRGASHVH  
VIWD

>ToN1\_49970|KEGG|CYP1157D1|[Aromatoleum petrolei]apet|BP

MTDHMPDDL SAVGRDMRAYTDEL RPRHGVVRNVQGEWVLLRH ELVVEAALSDDRFSNAVS  
SHLQIPNGMDSDEHTAYRDALDRFLT PDALAPFHERFR RVAADLVASLPRDVAVD AVS QV  
GVRFAVRAQSAWLGW PADLEDRLVAWVAENHAATRSGDKAWTQKVAESFDDLILSVLEPR  
RAARGDDTDDL TARLMQTEVSGRRLTDAEIVSVLRNWTGGDLGSIAQCVGVLIHYLATHP  
AVQDHLRAGVPDAEIDAIIDEILRIDDPFLSNRRVTTC PVAIGGVQLPQGARVKLNWTS A  
NRDEATFGNPDSMDPERNADRNLVYGIGKHACPGRWLATLEMRIALQELLAATSSIALDP  
QQSTERAASPVGGWAKVAVVLA

>C0099\_03585|KEGG|CYP289A29|[Aromatoleum pumilum]atw|BP

MNTARHRAAPDWDPRAPSVQRDQIAAYDGMRI RCPVAHSDYLHWSIFRHADVLRVIGDHE  
TFSNRVSQHLSVPNGMDPPQHAAFR AIVERHFDATAMATFEPACRRIAHKLAAALPVPGE  
VELMRDFAHPFALEVQCAFMGWPGWMRDALADWMRENQRATHSGDRAAMRSVAERFDATL  
RRLFDERRAAGAAAPDDATTRLRLRERVDGRALTDEEIVSIVRNWTAGELGTIAAAIGIVA  
RRLAVEPTLQTTLRADRSLLAPAIDEVLRIDPPLIANRRVTTC PVRLGERDIAAGERISV  
MWAGANRDEAVFDEPDRVRLDRDPADNLLYGAGIHVC PGAPLARLELHAAIEALLERCAV  
LAPLADRPPHRAGYPAGGWDKVPLQLG

>azo2527|KEGG|CYP203A3|[Azoarcus olearius]azo|BP

MFSFDPYSPA VDADPFPFYKTLRDEHPCFWSKEANMWVLSRYADIVTALNDWQTFSSAKG  
NLMTLPNRAGATLGTTDP PRHDLRLGLVQHAFMKRNLES LAEPIRQIARETAAPLADLK  
QFDFIEDFSSKFTVRVLFAALGLPLGDEALVREKAVTMVQSDAATRQKGPEHIAAYNWMQ  
DYASKVIAERRANPKDDLISHFSMAEIDGDR LDEREVLLTVTTLIMAGIESLGGFMGMFA  
LNMADHADARRQCVANPDLLVDAIEESLRFNTSAQRFR RCLTRDHTLHGKTMREGDFVCL  
AYGSGNRDERQFPNPDVYDIGRKP KHLGFGGAVHACLGTTIARISVKAAMDAFHRVVPD  
YVRVQEHLPPWMPSSSTFRSPLRLELARA

>dqs\_2684|KEGG|CYP203A3|[Azoarcus olearius]aoa|BP

MFSFDPYSPA VDADPFPFYKTLRDEHPCFWSKEANMWVLSRYADIVTALNDWQTFSSAKG

NLMTELPNRGATLGTTDPPRHDLRGLVQHAFMKRNLESLAEPIRQIARETAAPLADLK  
QDFDIEDFSSKFTVRVLFAALGLPLGDEALVREKAVTMVQSDAATRQKGPEHIAAYNWMQ  
DYASKVIAERRANPKDDLISHFSMAEIDGDRLDEREVLLTVTTLIMAGIESLGGFMGMFA  
LNMAHADARRQCVANPDLLVDAIEESLRFNTSAQRFRCLTRDHTLHGQTMREGDFVCL  
AYGSGNRDERQFPNPDVYDIGRKPKGHLGFGGAVHACLGTTIARISVKAAMNAFHRVVPD  
YVRVQEHLPWMPSSSTFRSPLRLELARA

>AzCIB\_2536|KEGG|CYP226A23|[Azoarcus sp.]azi|BP

MSSVKDVTLESAGVADNYRGEDVDLHAIYREMRKNSPIIAENFMGKLGVPNIAGLDPN  
RPTYTVFKYKDVMTVLRDAANYTSGFIAEGLGAFFDGLILTGMGDEAHKKARGLLQPIFM  
PDVNTWRDSKMDPIVRNEYLLPLVPKKKADLMDFGHLHFPIRLIYALIGFPDDEPEKVEQ  
YAAWALAILAGPQVDAEKAAIARKAAMEAAQALYDAVKEAVVAVRQRGAEGNDLISRLIR  
AEYEGRKLDDHEITTFVRSLLPAAGETTTTRTFGSLMVLLLERPDVLDVRKDRSLVGKAI  
DEAIRFEPVATFKVRQAAQDLELGGVRIPKGAMVQCIVSSANRDEEAFENSEEFDIDRKL  
KPSFGFGFGPHMCIGQFIAKTELQVALNAILDLFPNIRLDPDQPKPRITGAQLRGPHSVP  
VIWD

>CEW83\_02400|KEGG|CYP226A22|[Azoarcus communis]acom|BP  
MIIFYGPVPCENKETELSSDLNDLDLKSAYTAVSDTYKGTGDIHAACREMRDKSPIFVG  
DFIKQFGVPTNAGLQQGTRPTFALFRYHDVMNVLRDATTYTNSFILEGLGAAFSDGLFIL  
GMDGEAHRVRALLQPAFMPDTVNKWRDTMETLIRKDFLEPLVPQKKADLMEFGLYFPIR  
IMYALMGFPTQDQDKYKKYAAWTLAMVGGNQIDPTKVEEARRNAGTAAKMLYDSIMEVVV  
ARRAAGSQGDDLIGRLLRAEYEGEGLDDHQVVTFVRSLLPAAGETTTRTLGSVLTLLFNT  
PGTLERIKADRSLVPKLIDETIRYEPLATFKVREVAKDVEFYGVKIPKGSFVQCLVVSAN  
HDGEIFENPDVFDIDRKQKPSFGFGFGPHMCIGQFVAKVEIACAINSILDLFPNIRLDPD  
MPPPVIEGAQLRGASHVHVIWD

>CEW83\_02430|KEGG|CYP226A24|[Azoarcus communis]acom|BP

MNNAKNVTLEDAFAGVADNYRGEDVDLNAIYREMRKNSPIIAENFMGKLGVPNIAGLDAN  
RPTYTVFKYKDVMTVLRDATHYTSFGFIAEGLGAFFDGLILTGMGDEAHKKARGLLQPIFM  
PDVNTWRDSKMDPIVRNEYLLPMVSEKKADLMEFALYFPIRLIYALIGFPDDKPEKVKQ

YAAWALAILAGPQVDAERAALARKAAMEAAKALYDAVMEAVVEVRRNGAEGNDLISRLIR  
AEYEGRKLLDDHEITTFVRSLLPAAGETTTTRTFGSLMVLLLERPELLERIRNDRSLVGKAI  
DEAIRFEPVATFKVRQAAEDIELAGMPIPKGAMVQCISSANRDEEVFENSETFDIDRKL  
KPSFGFGFGPHMCIGQFIKTELQVALNAVLDLLPNIRLDPDFPAPRITGAQLRGPHSVR  
VIWD

>CDA09\_09135|KEGG|CYP108Z1|[Azoarcus sp.]azd|BP

MQAKIDDLICTPATYADSALYHRIFNSLRDDPVHWEVQDYRPFWLITKLEDIREVERQ  
NDIFLNAGRPTLRSRTEEEKIRAVTGKPDVFETILHMDGMDHRAHRAVAQSWFMPANLK  
KLEGAIQVAREFVDRLERQGGTADFCEVVAARYPLRIIMTIFGVPPEDQMLYYSKMI  
TAPTDDDVTETPRNELRIRAAQGLFDYFRKLLADRRANPRDDLSSVIANAEVDGKPISE  
LAALSYCVTIATAGHDTTSMTSSGGLLALVQHPEQMARLRADRSLMPGAIDEILRFVSPV  
KHMMREAKVDAIVRGKQIRAGDSLMLCFPSGNRDEDVFDNPHEFRIDRSPNRQIAFGSGV  
HSCGLHLAKMEIRALYAELLDRVDRFELDGTGPGFYKGFVVQGLKHLPIRYSMSKVTA

>CDA09\_13845|KEGG|CYP226A23|[Azoarcus sp.]azd|BP

MSSVKDVTLESAGVADNYRGEDVDLHAIYREMRKNSPIIAENFMGKLGVPNIAGLDPN  
RPTYTVFKYKDVMTVLRDAANYTSGFIAEGLGAFFDGLILTGMGEAHKKARGLLQPIFM  
PDVVNTWRDSKMDPIVRNEYLLPLVPKKKADLMDFGLHFPIRLIYALIGFPDDEPEKVEQ  
YAAWALAILAGPQVDAEKAARIARKAAMEAAQALYDAVKEAVVAVRQGAEGNDLISRLIR  
AEYEGRKLLDDHEITTFVRSLLPAAGETTTTRTFGSLMVLLLERPDVLDVRKDRSLVGKAI  
DEAIRFEPVATFKVRQAAQDLELGGVRIPRGAMVQCISSANRDEEAFENSEEFDIDRKL  
KPSFGFGFGPHMCIGQFIKTELQVALNAILDLFPNIRLDPDQPKPRITGAQLRGPHSVP  
VIWD

>CDA09\_13895|KEGG|CYP226A21|[Azoarcus sp.]azd|BP

MSTDILNLDLETAYTAVSETYKKGDIHAACREMRGKSPIYVGDFIKQFGVPTNAGLKQG  
TRPTFALFGYKDVMMNVLRDADTYTNGFIAEGLGAFFDGLIILAMDGEQHRRVRALLQPAF  
MPDVTNWKWRGQIDHVIRKDFLEPMVPQKKADLMDFGLYFPIREMYALMGFPTDDTERYKK  
YAAWTLAMVGGNQVDPEKIDEARRNAGIAVKLLYDAIQEVVVKRRAEGSHGDDIIGRLLR

AEYEGERLDDHQVITFVRSLLPAAGETTTTRTFSSVMTLLLTTPLVDRVRADRS LVPKLI  
DETTRYEPVATFKVRETAKEVELHGVTIPKGSFVQCMVVSANRDEEVFENPDQFDIDRKL  
KPSFGFGFGPHMCIGQFVAKVELNCAINAILDLFPNLR LDPDKPAPVIEGAQLRGASHVH  
VIWD

>Tmz1t\_0929|KEGG|CYP1157D1|[Thauera sp.]tmz|BP

MTDHMPDDVSAAGRDLRAYTDEL RPRHGVVRNVHGEWVLLRH ELVVQAALSDDRFSSAVS  
SQLHVPNGMDSTEHTAYREALDRFLTPEALTPFRERFRRVAADLVASLPRGVAIDAVSQV  
GVRFAVRAQSAWLGW PADLEDRLVDWVAENHAATRSGDRSWTRQVAESFDDLIRSVLEPR  
RGAREDDTDDVTVRLMRTEVNGRPLTDAEIVSVLRNWTGGDLGSIAQCIGVLVHYLATHP  
AVQDQLRSGVPDAEIDAMIDEILRIDDPFVSNRRVTTCPVTIGGVELPQGARVKLNWTS  
NRDET VFGDPDALDVERNADRNLVYGIGRHACPG RSLATLEMRIAVQELLAATSSIALEP  
QQPAERAVSPVGGWAKVAVVLA

>Tchl\_0232|KEGG|CYP116B253|[Thauera chlorobenzoica]tcl|BP

MSGLA AAFDPFEGPYQVDPAEALRWSRDQLPVFYSPKLG YWIVSRYDDIKSVFRDNVLYS  
PRNALEKITPATPEAMKVLASYGYAMNRTL VNEDEPAHMERRRVLLDHFM PENLEAKQEM  
VRRLTREKIDGFIDRGRVDLVEEMLYEVPLTIALHFLGVP EDEIERMRSFAVAHAVNTWG  
RPTPEQQIEVAHAVGRFWQYAGEVIEKMRADPDGEGWMHYTIRKNAE IPEIVTDSYVHSM  
MMAIIVAAHETTSLASTNMFKTLLTHRDAWEDVCADPSLIPNAVEECLRYAGSMVAWRRE  
TTAPAQLGGVELPAGAKLLIVQASGNQDERHFEDGDKFDIYRDNAVEHLTFGYGSHQCLG  
KNIGRLEMRI FLEEMSRRLPHLR LAEQEFTYLPNTSFRGPNNLWVEWNPEQNPERANPAL  
RRGGVHFPVGAPLRKEIARKVRVTAVRREADGVLGLTLEDVRGRPLPRWSAGAHGELCLG  
EYERKYS LCGRPDAPGYDVAILL EEQGRGGSRYLHEVVRPGTELKLRGPNNLFR LDESAR  
GYVLVAGGIGITPILAMADRLKMLGRDYVIHYAGRSRASMAFLARLES DHGGHVRIYSKQ  
EGERVDLP AIVGSLAEGAQIYACGPARMIRALEDL SAELPGNTLHFEHFS AQGSGLDPEQ  
ESAFEVELMDSGLTVAVAADTTLLEAIRAVGIDLASDCCEGLCGSCEVTVLEGEIDHRDL  
VLTRSERAE NRRMMACCSRAKSGGRIKLAL

>CCZ27\_08860|KEGG|CYP226A23|[Thauera sp.]thk|BP

MSSVKDVTLESAGVADNYRGEDVDLHAIYREMRKNSPIIAENFMGKLGVPNIAGLDPN  
RPTYTVFKYKDVMTVLRDAANYTSGFIAEGLGAFFDGLIILTGMDGEAHKKARGLLQPIFM  
PDVVNTWRDSKMDPIVRNEYLLPLVPKKKADLMDFGLFPIRLIYALIGFPDDEPEKVEQ  
YAAWALAILAGPQVDAEKAAIARKAAMEAAQALYDAVKEAVVAVRQGAEGNDLISRLIR  
AEYEGRKLLDDHEITTFVRSLLPAAGETTTTRTFGSLMVLLLERPDVLDVRKDRSLVGKAI  
DEAIRFEPVATFKVRQAAQDLELGGVRIPKGAMVQCISSANRDEEAFESSEEFDIDRKL  
KPSFGFGFGPHMCIGQFIAKTELQVALNAILDLFPNIRLDPDEPKPRITGAQLRGPHSVP  
VIWD

>CCZ27\_08910|KEGG|CYP226A21|[Thauera sp.]thk|BP

MSTDILNLDLETAYTAVSETYKKGDIHAACRAMRGKSPIYVGDFIKQFGVPTNAGLKQG  
TRPTFALFGYKDVMNVLRDADTYTNGFIAEGLGAFFDGLIILAMDGEQHRRVRALLQPAF  
MPDTVNKWRGQIDHVIRKDFLEPMVSQRKADLMDFGLYFPIREMYALMGFPTDDTEKYKK  
YAAWTLAMVGGNQVDPEKIDEARRNAGVAVKLLYDAIQEVVVKRRAEGSHGDDIIGRLLR  
AEYEGERLDDHQVITFVRSLLPAAGETTTTRTFSSVMTLLLTTPGLVDRVRADRSLVPKLI  
DEAVRYEPVATFKVRETAKEVELHGV TIPKGSFVQCMVVSANRDEEVFENPDQFDIDRKL  
KPSFGFGFGPHMCIGQFVAKVELNCAINAILDLFPNLRRLDPDKPAPVIEGAQLRGASHVH  
VIWD

>Tharo\_0243|KEGG|CYP116B253|[Thauera aromatica]tak|BP

MTIENSTQAQPTRGGCPVRHSEGACPASALAAAFDPFEGPYQVDPAEALRWSRDQLPVFY  
SPKLGWIVSRYDDIKSVFRDNVLYSPRNALEKITPATPEAMKVLASYGYAMNRTLVDNED  
EPAHMERRRVLLDHFLPENLEAKQEMVRRRLTREKIDGFDIDRGRVDLVEEMLYEVPLTIAL  
HFLGVPEDIEIERMRSFAVAHAVNTWGRPTPEQQVEVAHAVGRFWQYAGEVIEKMRADPDG  
EGWMHYTIRKNAEIP EIVTDSYVHSMMAIIVAAHETTSLASTNMFKTLLTHRDAWEDVC  
ADPSLIPNAVEECLRYAGSMVAWRRETTAAQALGGVELPAGAKLLIVQASGNQDERHFED  
GDRFDIYRDNAVEHLTFGYGSHQCLGKNIGRLEMRI FLEEMSRRLPHRLAEQEFTYLPN  
TSFRGPNNLWVEWDPEHNP ERANPALRRGSVHFVPVGA PLRKEIARKV RVSAVRQEAGGVL  
GLTLEDVRGRPLPRWSAGAHGELCLGEYERKYS LCGRPDAPGYDVAILLEEQGRGGSRI

HEVVRPGTELKLRGPNNLFRLLDESARSYVLIAGGIGITPILAMADRLKMLGRDYVIHYAG  
RSRASMAFLARLES DHGGRVRIYSKQEGERADLPAIVDSLAEGAQIYACGPARMIRALED  
LCAELPGNTLHFEHFS AQGSGLDPEKESAFEVELMDSGLTVAVAADTTLLEAIRAVGIDL  
ASDCCEGLCGSCEVSVLEGEIDHRDLVLTRAERAENRRMMACCSRAKSGGRIKLAL

>AI055061.1|NCBI|CYP1013A3|[Burkholderia mallei 23344]bmal|BP  
MSKHRQAPGPRGGLVMGNLAAYKRNPITMLRLHQYQGDVARNRLGPFVTHALAHDPDHIQ  
YVLQENHRNYVRGRFYDNFKMFFGDGLLTDDGEFWRRHRRVVQPLFHKKQVDAHTAAVGD  
AALALAYRWSALPPGKALDVVEEMHLSLRMLGLMVFN TDVSSHAEAAAGPAVRFGIEAMM  
PQGNLNDFIPRWAPTRFNRRIAHARRAIDTIVAKIIADHREARCEPSDVISL LLLNARDPD  
TGAPMTQQEVHDEVMTVFLAGHETT GAGLAWALYALAQH PAVLRQLRDELDARLGGRAPT  
VQDFEQLPYLSQVVDEVLRVYPPIWGFTRDLVEDDEIGGYRIPARSSVFMSPYVTHRHPA  
FWRNPDAFDPENFASDAPARHRFVYFPFGGGMKRCIGFQTALLQMRVLVAVVAQHFDLNA  
LPGHPIELGATISLRPVHGIRLIVKPRERQQSHLARVREHESARALRPLGDTATTAGAAC  
PMTAAREPGASAAALA AVEAGALDAAHRGGAAAAAAGEPCPPRDPAEAAPLPLAAAPAPA  
SPAVDADASARGVPAWRFTWRFPVPVDPVPDEPSPALSGRRIALVNGRGGTAERVA AALAR  
TCAKVS VFAPAASADHAEAAARVFVNEAGPLDGI VDLGLEAPFALDDAGAW EAPMRRTVEL  
LKACYGDWAAEDDTSRLFYVALTWMDGQMGYGETAG AQPLGGLWAGLAKTLPQELPNCNV  
RVLDIAPDETGRVDRLVVNELYRWGLFEVGYRGGVRYTLHAKRNELPPHAVDARTTLGAG  
DTVLFSGGARGIGLLCARSLAERHGCTVIVTGRET PPDGGEPWMALDEPGFKHYGLEQLR  
AATPEHPPKAIRAAALQRLKRRRELRTALDEMAALGLPVHYRVCDVTDRAAVRALCDELGD  
SLRMVIHNAGVDRPVRLIQKRAEDFADTVRTKVLGFANLCDAVRARPRLVQFCNVGSLTG  
RWGGMTGETDYAAANEALARLGLWAARHAFSPACGVKTLVWPTWEGVGMITNFAVTQRYV  
SPMNVDEGVRHWLRELAAPGSGEVMFMGAVGRAPT PMQIKGFVPIRELPNIGELVTRRH  
VGEPVRFRFPKRFESRYAIDPAVAPYAHAFR FNGRAVL PASLVLEHACAVGDWVMPPTGE  
PRELSEMTNVVLRLDALPDVPAGGAPVELASEAAGYMIGDVWCVDVRCSDARTQAELLSM  
TLVYRPQPEQIGAAFARAPDTTPEPAPLTSAPHAAWN GELLPAGDWSVPDDASAGIVRIG  
RVPSAAVLSLWALPFPLELRLPVNHVEHVLRVLLAEWGAARADAPAVWRIGGAKLARLPA  
ASADGVVEYAAGRFAVL DARGYVLLRIDDARVDGEPAQAALPETGALADPLTA

*Deltaproteobacteria*

>Desaf\_1336|KEGG|CYP152E2|[Desulfocurvibacter africanus subsp. Africanus]|daf|DP

MSTIPRDKLPESTLALFRDGYEFIGKRCKRLGSDVFQTRLMLQKTVCMRGPEAAQVFYDQ  
RYFQRKGGAPLRLRKTFLFGQGGVQGMGEAHRHRKAMFMSLMSSESIARLVRLMSDEWRA  
ALPGWAEKGRVLLDAARDILCRAVCWTGVPLKESEVRKRTQDFAAMIEDSGAIGPRHW  
KGRLSRKRAEGWIGGVIEAVRAGRLNPPEGSALRTVAFHRELDGELLKTRIAAVELINVL  
RPTVAVARFITFAALALYEYPDWRRRLARQKDRELELFVQEVRRFYPPFFPVAARVSKPF  
DWQGYHFP EGARALLDLYGTDHDPRAWDDPETFRPERFLTWDGSPFNFI SQGGGDHYENH  
RCPGEWITIELMKEAVRLLVMSMDYIVPQQDLTVSMTRMPTMPQSGFVIADVRPREVIV

>MXAN\_0683|KEGG|**CYP197F1**|[Myxococcus xanthus]|mx|DP

MVRSTCASGSSPLQDPFMSQVRLPPGPQGHFIAGNLVEFSEDPLGFLTRCAREYGDVVRL  
GKRNFLLNHPDLIERVLVNGDGNFVKLAGVGQGKRHKGGFPEAMNSEGEDWLRKRRLVQ  
PAFHRKHVAACGDTVVALTETMLQTWPRGDARDVHADVSALALDIVSRFLFHTPIDDEAR  
HVADAVDAVMRHTDSPLRPPIWVPTPTNLRLRRALGRLNTLLATLVRRYREQPESRTDLL  
ALLLSAPVPLSENQLRDELATMIMSGHETTADALVWAWYLLAQHPEAEARLVAELETVLG  
GRLPGAEDLPRLRYTEAVVKEAMRLYSPAWITSREALRDCELGGFHVPAGTMLAVSQWVT  
HRDARYFDAPESFRPDRWLSEDAQRMHRYVYFPFGGGPRFCIGSALAMMETVLITACVAR  
RFRLELAPGCVVRPRPALALQPLGVWLI PRHRSHTTQEGEVRHAAGA

>MXAN\_1743|KEGG|**CYP1506A3**|[Myxococcus xanthus]|mx|DP

MPNLLSRGLFSLFFGGRRKPLASLPGPAPGILGNIGDFLGAQPWDVCARYARTYGPVAVA  
WLGPSPALVLNDPTLIEHVLETRRLEFEKGNIGDQIRHSVTDDTPFIAQQGEDWARKHAM



DPLAQPWTPAWQAAQVEPLRAAILESVEALLQQPSIDLTPTLRKLTFDAFCVATVGEKLP  
TSVYDDFMLLAAAADARIQAKLPLKFVSPPKGFADAKERFYGLFLDKVRAARKAPAPHRV  
DLMSWTLREMPQLDDVVHANLLGGFFFGGVFSSSTTLVGAFHQLNKYPATEERLALESAA  
LGQGPLTLERLKDAPWGEAVAYEALRILPAVRIFLRRTPTPTRLAEVTLP PGTTLMISN  
QHLHRDPSHWTAPETFAPERWLDGGAARNPHGSDHFFPFGRGPRACVAGDFAIVYLRTAL  
ATVSARARIHVDSTEPFEEGFFFGVVRPQGVTGKLVPRQVQTLHPPTGAPPPAVESA

>MXAN\_2304|KEGG|**CYP253H2**|[Myxococcus xanthus]|mx|DP

MSIHPAGASTAAPLPPLSPGAPLIGHLRALRKDPLHFLQAQAREYGDVVRLPMGPADLVL  
VAHPDGVRHVLQDHARNYSKQSRGFRVLQELLGHGLLTSDDGHWLRQRRLAQPAFHRQRV  
AGFTRTMVDAAADLAATMEARADTGAAFNVAEDFTRLTLRIASSTLFGADVSSATHDIAT  
VMSRLQVFVYKRLTQPVPLSLRLPLPAHRQFERDVGSLNRVVHGI IAKRRRESGEHDDL  
QMMMEAHDDDTGERMSDSQLRDEVLTLLLAGHETTASALAWTIMLLSQHPGVRDMESEL  
ARELGGRNPETHDLPRLELTHRVVDESLRLYPWALSRIATKEDLVGGFRIPKGAHLII  
APWVTHRHP SIWNPGEFDPDRFLPEREQARPRFAWFPGGGPRQCIGNQFALMELVLVL  
ATLLQRVRLNLTPGQVIHPTPAITLRPRPGVWVTASRP

>MXAN\_3943|KEGG|**CYP209A1**|[Myxococcus xanthus]|mx|DP

MCGRPPQGGLFMTSEPVEPDHALSKPPPVAPVGAQALPRGPAMPGIAQLMMLFLRPTE  
FLDRCAARYGDTFTLKIPGTPPFIQTSDPALIEVIFKGDPLFLGGKANGLKPVVGENS  
LLVLDGKRHRDRKLIMPTFLGERMHAYG SVIRDIVNAALDRWPVGKPFVHEETQQIML  
EVILRVIFGLEDARTIAQFRHHVHQVLKLALFLFPNGEGKPAEGFARAVGKAFPSLDVF  
ASLKAIDDI IYQEIQDRRSQDISGRQDVLSLMMQSHYDDGSVMT PQELRDELMTLLMAGH  
ETSATIAAWCVYHLCRHPDAMGKLREEIAAHTVDGVLPLAKINELKFLDAVVKETMRITP  
VFSLVARVLKEPQTIGGTTYPANVVLSPNIYGTHHRADLWGD PKVFRPERFLEERVNPFH  
YFPFGGGIRKCI GTSFAYYEMKIFVSETVRRMRFDTRPGYHAKVVRRSNTLAPSQGVPII  
VESRLPS

>MXAN\_4127|KEGG|**CYP147A2**|[Myxococcus xanthus]|mx|DP

MAQASIFEQILD PANRANPYPLYAELRKT PVAREADGTIYIVSTYDEIVALLHDPRVSSDI  
RNLVRQAGATPSPQEGPGLPEPFIRRDPPDHRLRKLAMRPF GPPHTPGRIDALRPWL  
ETTTGLLDALAGKNQVDIVGDVAYFPVTVICKLLGVPREDEARFHELADAGVETLDP  
GTIEQRKAKRDRTKAELRQYLAALADAHLRQPGGDLLSGFLT DNGPDGRMSREEVLSTAA  
LLL VAGHETTVNLIANGMLTLLRHPGVFERLRREPELSIPLVEELLRYEPPVQFLPDRVT  
LADIDIAGTTIPQGSPLVLM LAAGSRDPERFDDPDRFMPDRPNNSHLGFGSGIHYCFGAP

LARLEAQIALTELACRLEHPRLVADPPPYRPNPALRGPLHLLVEVDGIRAAGVR

>MXAN\_4919|KEGG|**CYP1069C1**|[Myxococcus xanthus]|mx|DP

MSKTNAPSGLGSEYHPLDSPQLENPHPFLLARARSEEPVFFSPALGAWVVRHADISAVVA  
DTTRFSSAESITVGAATTPPEVV TALMDGYPLVPSLVDNDPPAHGRFRSLVSKAFTGRRL  
AEKEPFIRTLVDALIH SFRHERQADLFLRF AHPLSCSIIAEILGIPSSDIHRFRWSDEL  
STVLA AHGPIEHQVACAQGVVEFQRYLASTLKEREVSPREDLLSDIVTGAQGMTPPMSMA  
ELVSLLMQVHFAGHETTAGLIVGAVELLLHEHPEQLRALRDDPGLIAGAVEEAVRMISPVH  
AMFRTALEAVEIGGVPIPKGAHIRIVYASANRDEARFHEPERFDIRRP EVKKHLAFGQGL  
HFCIGAPLARLEARLAVEALLRSLPGLRLVPGQKPGFLRSVTVRRHESLEVAWDVQANQA  
L

>MXAN\_7298|KEGG|CYP1069A3|[Myxococcus xanthus]|mx|DP

MPVSVQKQEETGVP AHASAGRCPHLGAQYNPFTGPHAEDPHAFFEKL RKDEPVSFSPMLN  
MWLVSRYEDISQVLKSPAQYSNRDMLASGTHLTDEAKAILDQGFPTAHVLLGMDPPEHTR  
LRRLMNRGFTAQRIAGMPFIREMATTLVDRFAQDGEADLVKQLAWPLPVHVILGVMGV  
QEDVWKIKRWSSDWQQLVFEYVAPELQVEMAKGVIEFQQYCIRLIEDRKKNPQEDLTSYL  
VAVESDGEALTMHELVM AVGASMLSAGHESTTALMANAWKLALQHGLWQRLRDNRDLPK  
FLEESSRYDSVSHAMIRTAKEDVELGGVKIPQGSRLLLLFAAGSRDESLCPHSSKLDVDR  
EKVPQHLYTGRGTHFCLGAPLARLQFEITTNILLDRLPDPKLVPGQDFGTWQSLVLRQMK  
HLKVEWTPT

>MYSTI\_02578|KEGG|**CYP1506A2**|[Myxococcus stipitatus]|msd|DP

MPNLLSRGLFNLF FGSRRKPLASLP GPPPGILGNLGDFLGAPPWDVCAHYARTHGPVAVA  
WLGPSPALVLNDPAVIHEVMETRRLFEFEKGNIGTQIRHSVTDDTPFIADQGADWARKHAM  
DPLAQPWTPAWQAAQVEPMRAALESVEALLREPSLDLALALRKLTDFDVFCVATVGEKLP  
TSVYDDFILLAAAADARIQAKLPLRFVSPPKGFAAAKERFYGLFADKIRAARQAPS AHRV  
DLMSWTLREMPDFDDRVAHLLGGFFFGGVFSSSTTLTGAVHQLQKYPAVEERLAKESAA  
LMRVPLDFERLKGGSWGEAVAFEALRILPAVRVFLRRSPLAPTQLVGVTLP PGMTLMISN  
QHLHRDP SHWVQPEVFDPERWLNNGGAARNPLGSGHFFPFGRGPRACVAGDFAMVYLRTAL  
ATLFAVRVRIQVDSTEPFEEGFFFGVVLPKGVTKGFVARQRATDSTPMGAPPSSAVESA

>MYSTI\_03599|KEGG|**CYP253L1**|[Myxococcus stipitatus]|msd|DP

MDSTQVP SHPPSPWGLPLWGHLRHRDPLGF AVESFRKHGDVVRLKLGETTYLVSHPD  
HVR YFLTENANNYSKPPLVNDPFLGNGLFVSEGTYWRRQRRLVQPSFHRERLNGLLSGMA

ALIDGMLKSWEERTRAAQPLDIAEEMGILSLHMTTRALYSEVPDAPTTAAVRRMMHTFNA  
RESLLARVLRRLERLPLYRRKWADFFDTQRLMRRKAKEVVERRREGGPEDDIMAMLVAARD  
RDTGEAMTEKELRDEFMNLFSGNEGPGAALAWGWHLLSLHPEIADRLASESAAVLGGRAP  
TLEDLPRLRYATQVFEESSLRLYPTAWKLVRVAGAADTLGTYPVAPGTVFMAISYIIHRHP  
EFWSSPEVFDPPDRFAPGGPARHKFAYLPFGGGQHICIANNLSLMFGALVLAMVSQRFRLR  
GIPGRRVDIHPGISLLPRGGLPMTLEPRP

>MYSTI\_04048|KEGG|**CYP1501A1**|[Myxococcus stipitatus]|msd|DP

MDTSVSSSSGRRLAGPRGLPVLGSFFPMLSEPLALANKLHARYGDVSLIRVYKTPIAFLR  
NPVDVKRVLIDEPQTFPKPLIDNPFNGNGLTVSRGDHWKRQRHMQPLFHKEKVRLWSGI  
FSEELAKSVERWKEMGARGESFDMYTEGARLMFGVMWRTCFFEEQPEIAYFDRIMDAIDVF  
GRRVSPLSVLLYNLMPRMDPRHERVYTSVKLINGWIYERIGKRRGRGTEDGDITLLSMLV  
EAKARDSGESMNDKEVRDEIVNLFASFEMIATSLTWAIHACTQHPEVTQAIRDEVQGV  
GGAPPRYEDVAKMPYTNRVVQEIINRLCPPAWTILRETASEVEVGGVMLPKGTQLLLC  
PYAIHRHPDHWKDAETFDPPDRFLPERLTGMHKGAYVPFGAGSRICVQGHMSLVDTVQTLAAVL  
QQLDVEYLGKTPVEWQTRLTFVPHGMPVRMRARQG

>MYSTI\_04343|KEGG|**CYP1491A1**|[Myxococcus stipitatus]|msd|DP

MQGTHAETPLPPGSRLHWLLGNPRQVKDALGQLVRGHKRHGDIVYFRFFEGPTFLLCHP  
EHAQRVMVDNARNYRFPGPENGFDGPLMGRGLFASRGDYWLRQRRMVQPAFHRPRLGGMV  
SGLVEGTLAMVERWEPHLHSGQPLELLEEMRHLSISLLGRTIFSRDVYAESAQLREALDF  
FTRDSHGPRDSVVKVVRQLLRLNPGHHERFMGAITKMNTVLYALIAERRAAPSLGDDVLG  
MLMSARDAQGEAMTDRQVRDELVSFVGGQEATAVALTWTWYALARNPEVEQRIRKELAD  
VLGGELPTSATLPELHYTRATVEETLRLYPPSWQFARRAREADEVGGFKVPPGMLMLISP  
YILHRHPSAWEEPERFLPERFMGEQRERRSQRLAYMPFGAGQRLCIGNHFTPVLMTAVLA  
VTLRRFQHRLVPDFPVVTMSGSTFRPRNGLMATLHPASPLP

>MYSTI\_04792|KEGG|**CYP1497A1**|[Myxococcus stipitatus]|msd|DP

MTRHELPPGLSASAAAQGFRFFQNPLSFLDQCVEQFGDLFTIQFPGSRKQVCLSNPEDLK  
EMYTGSPDLLHAGEAAGSVFSPLTGWNCTLTLDGEAHARRRELTVQAPFRGGQVERHAGAM  
YAIATAAIERWPRTGRFPLQPQMQDIALRIIFRTVLGLDDTAPGHARFLELISQVARLGM  
GSKMLLIPALRWDLGPLSPWGRIVRIVRDTDALLFAEIIARRRTPDKLATSEDVLSLLIRG  
EGQDGLRLTDQEIRDDETVALLIAGLETTAVALTWVAERLMALPEVRERLRAELEPLHTNG  
ELDVTRLALPYLDAVLKESLRNRSLSPICGGRVLKAPMRLREYELPADTVLINSPLYLLH  
RRRELYSEPDAFRPERFLGSPPSAHKWTTFGGGRNRCLGQKFALLELKVVTSAMVLQTGL

ELATPRVVPKADGIHLVPAAGLPVRRGTCPFAKKAAAAS

>MYSTI\_04794|KEGG|**CYP120F1**|[Myxococcus stipitatus]|msd|DP

MHQPPPLPPHASGVPWVGDSVEFGRNPQRFVLKRQARFGPVFMGHILGASTAVMVGPPQALR  
FVLSSSHRHHFVSGPGWPRGLGMLMSGALMMKDGDIIQTRTRLLAPALAGSALASYTPVME  
ATARRHLERWVQQGRLSLYDGLKGLTFDTASQLLFGTPEGADTGRLGKLFATYTAGMQGL  
HPVVPLRVPFTPFGRFAARSEMLKEVTRIIQEREKSTGSDALARLLESRKEQGEGPSAD  
ALAEQAFFLLFAGHESTSSLTTWACLELSRHPDLLDSAREEAQSLGEGPLTMERVERLPF  
LEQVLLETERLHPPFSGSFRQVVKSFENGFHVPEGCRVFYSINGTHGDPATFPEPERFT  
PGRFTPEAACARHELGLVGFGAGPRSCLMGFGARLQAKVVLALLLRDYEWSLQPKQSLD  
PVYLP SLFPKDHLRVSFRRRSAQETRHRETA

>MYSTI\_04805|KEGG|**CYP1503A1**|[Myxococcus stipitatus]|msd|DP

MSQTPEISIFSPSFLANPFPIYQQLREQAPVFWWSRELGAWLISRYADV KMLLTDERATPD  
QKAWAGYPELKTS AQPTHEHVQWALDATLLLCHGAQHARMRRFANTPFQSAGCGRIARVTE  
QVVHEVLDDGFSGRKEIDLLADFSAPIRIKVMGR LFGAGFTPEEEEF LVTGTNLALGFLEP  
SLAPEAITRNEGALRGFRALVENVIRRGKEAGAEDSILGDLLQPNREGDRLSDEEVLSLV  
FSFLLAGTEANGSLITMGVLLLLLEHSGQLAHLQREPDRYPDAIREILRYSFTKFLPRYL  
KEDISLHGNVMKQGQIALLLFQSAFRDPETFENPDVFDVMRKRSHELLAFGAGPHRCVGE  
RMAEIEAVIALREFFKRFKATLRGSEADWVKHHMLVAVPRSVPVVPVLLS

>MYSTI\_04813|KEGG|**CYP1495A1**|[Myxococcus stipitatus]|msd|DP

MEPDFNPAHPAFRADPHRWLGWLRERDPVHFSRPLNAWVLTRYDDVRR AATDVTHFSNDT  
LSVLVGKHAGAMGPRRTEHRIGTNLGMADGAVHTRLRTAIAPYFTPGAIHRLETGLQHYV  
DGLLRRAASGGELDLVAGLGRPLAVEAVASGLFGIPEGDREPLSGWAAATTRISDPLLTR  
EERENFLELTRFADYLDGLVVQRRQQPGDDLLSRIADLDRSGLTHPEVLATCMSIVGGG  
IDTVSMGISRGILALLDHPEQMELLRENPDLLPGATEEILRFCAPAVFVARVVRVDLELR  
EKT LAAGDVVLYSPAAACRDP AVFSEPDRDLDRREVERGHNLAFGHGAHYCIGAALARLE  
LRVAFRGVLSRLPRLELKVPRSM LTYGRNLMSMGIESLPVVFPPQNIPLP

>MYSTI\_04828|KEGG|**CYP125N1**|[Myxococcus stipitatus]|msd|DP

MHKTELADLASPITYGRAIPHETFEHLRREAPVYFHQEPDGGTGFWAITRHEDIITISRD  
PATYSSYRGGTSIEDYSQEDLSLIRFMM LNMDDPPQHVKYRRLVSSGFTPVAITYLEPRIR

AVTKEILDKVVHEREFDVTSIAAELPLQVIAELVGIPREERHQLFAWSNRLIDYDDSGR  
ARSFDDAKMAAMEMWQYANQLAARNQGREGKDLVSVLMNAEVDGEKLNEAEFDAFFLLLI  
VAGNETTRNLISGGMLALMEHPEELARLRANPALLPTAVEEMLRWVSPVVCFRRTVTRDT  
VLRGQQLREGDKVVLFPYPSANRDESVFENPGRFDISRFPNEHIAFGIGQHYCLGTSLARL  
EIRVMFEELLKRLDGLELAGPVERRRSKLVNAIRAMPVRRPPSSRPREGARENQEGTACE  
PSMRG

>MYSTI\_06075|KEGG|**CYP1352B1**||*Myxococcus stipitatus*||msd|DP

MSKSAPPTFISRFEPHNVENPYPLYARMREEAPVHFSPEMHLWVVSRRHDDVKAVVLNPQD  
FLSANSFRNPVPPAPEVVAVLEQGYQPVPALVDDDPNHTMRVIVTKALAPHRLSAMEA  
RVRSITTELLDAFAADGHADLVKLGYPPLPARVIGAIMGLPDSDLERMKRWTEDLALLSA  
GNVPVARQVECAHGLVSIQKYLAGYIAERRKTPGDDLISALIEARYEDSPPLSDVELISL  
LSLLHFAGHETTTNLLGNLLVWVLQEPERLKELRDPTRIAPRAIEETLRRLDSPIQGMRT  
TARAVTLNGVEIPANARVLVLFASANRDETIFHAPDHGDPRRPDVGKHLGFGMGIHYCIG  
APLARLEVKLAMEMLLKRLPNLRLAPGNAFSYVPNFLHRGPHRLLVEWDPA

>MYSTI\_07239|KEGG|**CYP229H1**||*Myxococcus stipitatus*||msd|DP

MSPSNPVVAATHPDYPFYADLVARRPFYRDDTLGLWVASSARAVGAVLSSPACRVRPLP  
EPVPRVLQGLASAEVFGRLARMNEGPFHLVVRALMTVLGTLGAEHGAEEGRRQARRLIA  
EEVPLRELVLFRPLPVQAVGALLGLEPGGLPEVASWTGALVRGMAPGADAEQVREGALAAER  
LMAVFHARLAHSEDGPLTLLSRELGASSTAPGALSREQADAESSAVIVSNAIGLLVQTHD  
ATAGLLGNALRASLADPAVYAQVSSRPEWLPRLLEVLRFDPVQNTRRFLSEDAVIDGR  
ALRAGDTVLVVLAAANRDPVHHAPHRFDLHREPSELATFGEGRHACPGAALARAVSLGA  
LEVLFATDLVSHRAAFSATGFQPSVNGRVPLLPRLHLHSREHTT

>A176\_002600|KEGG|**CYP109S1**||*Myxococcus hansupus*||mym|DP

MSNALWGVRLPLVEFEPFSSVHWEDPYPVYRALREHSPVHWAPKAKLFCVSRHADVDFVLR  
RPEQFSSRAMTAVMFENKRPELGDVPSSLRLVVRGRVDVQKFFQGPPDAIINSDPPRHGA  
LRGMVSRCFTPRTIASWEPRIRELVNECLAPLRAGQPFDDVVSGLAVPLPVVIVTEMLGVE  
PEWRADFKRWAAGFITATGAGRDRTPMREFFDVLTEFRAYMRTLVEKRRQAPTEDLISV  
LVDPAQKEVLDEEELFSFIHTLLLGGNETTTNLIGNAVAALLDHPEQLALVQGAPEKIPG  
LVEETLRWESPVQFTLRSAVEDVDVGGVRLPAGSNMALLLGAANRDERAFKSPDTFDVTR  
TPSPHRAFGFGIHHCLGAGLARLEARVALEELVPLLPGVRRADARREYVDSLMMRGLARL  
PLVPR

>A176\_004746|CYP253H1|[Myxococcus hansupus]|mym|DP

MSTHSAGESTAAPLPPSPVGTPLLGHMRVLRSDPLTFLQAQVRQYGDVVRIHVGPASLVV  
VAHPDGVRHVLQDQAKRYGKRTRGLAALRELLGHLLTSEGSFWLRQRRLAQPAFHRQRL  
AGFARTMVDAASDLASELEARADAGTAFDVAEDCMRLTLRIASSTLFGKDVSGAWHDIAD  
AMGRVQVFTYKRLTQALPIPRRLPLPTHRRFERDTHMLDRVVRGIIETRRRDTGAHHDLL  
QMMLEQQDADTGERMSDTQLRDEVLTMLLAGHETTANALSWTLMLLSQHPSVRRDLEAEL  
AQVLGGRKPTDEDLPRALTRRVVDEVLRLYPPAWSLSRVAIEDDVIGGFRI PKGTYLLL  
SPWVTHRHPRVWDNPEGFDPRFLPEHEQERPRFAWFPGGGPRQCIGNQFALMELVVLV  
ATLLQVRVRLNLTPGQIIRPAPAITLRPRSGVWVTAARAP

>A176\_006320|KEGG|CYP197F1|[Myxococcus hansupus]|mym|DP

MPQVRLPPGPKGHFIAGNLVEFSEDPLGFLTRCAREYGDVVRLGKRNFLNPDPLIEKVL  
VNGDGNFVKLAGVGQQRHRGGFPEAMMNSEGEDWLRKRRLVQPAFHRKHVAACGDTVVS  
LTEQMLQTWRPGDARDVHAEVSALALGIVSRFLFHTPIDDEARHVADAVDAVMRHTDSPL  
RPPMWVPTPTNLRLRRALDRLDTLLTTLLRRYREHPESRTDLLALLLSSPVPLSEAQLRD  
ELATMILSGHETTADALVWAWYLLAQHPEAEARLREELDTVLGGRLPGAEDLPRLSFTEA  
VVKEAMRLYSPA WITSREALRDCELGGFHV PAGTTLAVSQWVTHRDP RYFDAPDAFRPER  
WLSEDATRRHKYVYFPFGGGPRFCIGAALAMMETVLITACVARRYRLELAPGCVVRPRPA  
LALQPLGVRLIPHPRAARGLESEARHAARA

>A176\_007236|KEGG|CYP1069A2|[Myxococcus hansupus]|mym|DP

MSVPKQEETGAPAPASSGRCPHLGAQYNPFAGPHVENPHPFDDQLRKEEPVAFSPMLNMW  
LISRYDDIAQVLRDPARFSNRDMLVSGTHAHLTEEARAILAQGYPTAHVLLGMDPPEHTR  
LRRLMNQCFTPQRVASLAPLVQRMATELVERFDKTGQADLVTQLAYPMPVHVILGAVGVP  
QEDFWRIKGWSTDWQRILFEYVPPEKQVDMAKGFLEFQQYCIRLIEDRRRNPRDDLASHM  
LAVEDNGEALSLHELIMAIGGSMLAAGHESTTALLANAWKLALQHGLWQRLRDHRELVP  
R FLEESSRYDSVSHAMIRTATEDVVVGGVKIPGGSRLLLLYAAASRDEALCPHANKLDLDR  
EKVPQHLYTYGRGTHFCLGAPLARLQFHVATNLLLDRLPDPRLVAGQDFGTTQNLVLRQMK  
HLKVEWTPH

>MFUL124B02\_14085|KEGG|**CYP1506A6**||*Myxococcus fulvus*||mfb|DP

MPNLLSRGLFNLFFGGRRAPLASLPGPTPGLLGNLGDFLGTQPWDVCARYAREYGPVTVA  
WLGPSPALILNDADVIHEVMQTRRLEFEKGNIGEQIRHSTDDTFFIAEQGDDWARKHAM  
DPLAQPWTPAWHAAQVEPLRRALLESVEACFAHPSVDLTPTLRKMTFDAFCVATVGEKLP  
ASSYDDFMLLAAGADARIQAKLPLRFVSAPKGFEEAAKERFYGAFARRIHEARQARSSTAV  
DLMSWTLREMPRLDDQVHAHLLGGFFFGGVFSSSTTLVGAFHQLNKYPATLERLALESDA  
LAQGPLSLRLVAEAPWGEAVAYEALRLLPAVRVFMRRSPLTPSRLAGVTLPSTTLMVS  
NQHLHRDPSHWASPETFDPERWLNNGGAARDPLGSGHFFFPFGRGPRACVAGDFAMVYLRTA  
LATLSARARILVDSTEPFEEGFFFGVVRPQGVTKITPRERSTLHPASPEAPLPPAVESA

>MFUL124B02\_42165|KEGG|**CYP1069A4**||*Myxococcus fulvus*||mfb|DP

MPVTVQKQEETGVPAAHAPTGRCPHLGAQYNPFAGPHVDNPHPPFFERLRQEEPVSFNPMLG  
MWLVSRHDDILQVLKETTRFSNRDMLVSGTQLTEEAKNILSQGFPTAHVLLGMDPPDHTR  
LRRLMNRGFTAQRIAGMEPFIEKMARELIGRFKDGHADLVEQLAYPLPAHVILGVMGVP  
QEDVWKIKKWSADWQSLTFEHVPAEKQAEMARGVLEFQRYCVNLIERRKAPREDLTSYL  
VEVEADGEALSVHELVAIGASFLSAGHESTTALMANTWKLALAHGLWGRLEDPELIPK  
FIEEGSRFDSVQHAMI RTALEDVEVGGIQLPKGARLLLLLYAAGSRDESLCPHANKLDVDR  
EKPPQHLTYGRGIHFCLGAPLARLQTQITRLLVEAVGNPRLVPNQDYGWTQWSIVLRQMR  
HLKVEWDVTP

>COCOR\_00795|KEGG|**CYP197J1**||*Corallococcus coralloides*||ccx|DP

MHAAPSDSAVLPPRLPAGLPWVGQGLEYSRKDPLGFFFLRYADRGAVVRTRFVGTDIYLLNT  
SEAIEHVLVKNFERNYPKDAFQKRALEAVVGHGLFTSHGDFWMRRRRMMQPAFHKNLLTAH  
GSVAVKAASTWMASRREGASFDAYPEMMALTLDVVAETLFGANLSAQARELGRAMEAVML  
HAQHLLFDTPISLPAWVPTLGQRRFRAGLRALHAVVDDVVERRRRQGGPGEDLLGLMLEAQ  
AEDGEHLTDAQLRDECLTLMIAGHETTATALALSLLARHPDAQAALRRELATVLGGRE  
PTVADLPSLPYCEQVVKESLRLYPPAWGMSRVAEQDDRMDGVLVPAGTVVAWSQWALHRD  
ASHFPEPEAFRPERWADGLERRIPRFAYCFFGGGPRLCIGAGSALMVIRLVLATVLQRIH  
FEAEPGPAPEVLPAITLRPKNGIPLVARRVSRQE

>COCOR\_02122|KEGG|**CYP264K**||*Corallococcus coralloides*||ccx|DP

MQTYDLFAPTTETERHALYARMRAESGLCRIAPFGAYAAARYEDVRTIQKDAQRFSSSEAL  
ATTAEPWLGPNPVAQSLVTRDPPRHTQLRALINRAFGPTGMARLEAQVRQEAQTLAEAA

VSQREVDLVDAFSFVLPRNII GRMLGLEPSTFTEFKRWSVNMGLITSAPPAQHAGIRDTV  
KEMEDYLGGVITARRRQPGEDMVSDLLRAEVEGQRLTDAEVL SFLFLLLPAGMETTAQLI  
GNAAILLARHPEQLEQARADRAHIPRFIEEVL RCEPPAQFAFRVATSDVELSGTPIPAGS  
LVMGLVASANRDERIFEQPDVFAPGREKASQHLSFGHGIHFCLGAQLARMEARLALEALV  
PRIRALRLRAPDIEWLPGLTIHGPR TLPVELLPA

>COCOR\_02428|KEGG|**CYP253D2**||[Corallococcus coralloides]|ccx|DP

MHAGHVGVLPLRPMTTATAAVTRRAPGHRGHL LMGILPDVRRDLLGCMSTLHRQYGDVVG  
YRLGPQRAHLIAHPDGVKHLVQDHVKNYTKDHLTYRMVRWLTGNLLVSTGDFWLRQRRL  
AQPAFHRQRIAGMAAGMVRRT EAMLQRWEPAAASGTPLSISEEMKRLTLTIVGEALFGTS  
VEDQTERVGVAFTEL GKQIAERFRTFRMLPPVLPTPYDRAFR AARASLQETVRGIIATR  
ERGDDSGDLLSMLMLARDEDTGEGMTDEQLGA EVMTMLLAGHETTATALSWTWGLLSKYP  
EAEARLHAELDAVLGGRAPTVEDMPRLTYTKQVLEETMRLYPSVPIFSRTVDEDDVIGGF  
HIPKGTSVNLCPYVTQRHPDFWEEPDAFRPERFAPEAAAKRHRFAYFPFSGGPRMCIGSG  
FTMMEAQLIVATVAQRYRLREAPGFTLEPNANLTLWPKGELPMYLERRS

>COCOR\_02429|KEGG|**CYP253D1**||[Corallococcus coralloides]|ccx|DP

MTTAAATATVTRQPPGPRGHLLMGILPDVRRDILGCLGTLHREYGDVVRYRLGPMRSHLV  
AHPDAVKHVLQDHVKNYTKDHLTYRMGRWITGNLLTSTGDFWLRQRRLAQPAFHRQRIA  
GMAAGMVRQTQGLLQRWETAAANGTPVGINEEMRLTLAIVGEALFGTSVEAQAGQVGAA  
FTELSQQIAERFRTFRMLPPVLPTRYDRAFRDARATLLRTVRGII TTRRERGDDTGDLLS  
MLMLARDEDTGEGMTDEQLGA EVMTMLLAGHETTATSLSWVWGLLSKHPEVEARLHAELD  
AVLGGHAPTVEDVPRLTYTKQVVEEAMRLYPAAVIFSRSVQEDDVIGGFRI PKGTSVDVS  
PYVTQRHPDFWEEPEAFRPERFAPEAAAKRHRFAYFPFSGGPRQCIGNSFAMMEAQLVLA  
TVAQRYRLREAPGFTLDPD SHLTLRPKGALPMYLERRS

>COCOR\_02734|KEGG|**CYP1506A1**||[Corallococcus coralloides]|ccx|DP

MPNALSRGLFNLFFGAKRKPFASLPGPQPGILGTAGDFLGASPDVCARYGREYGGVTLI  
WMGPNPGLVLNDPALIAEVYESPRMEFEKGNISEQIRPSTTDDTAFTAELRGDWVQKRA  
LEPSAQPWAEALADLVGPMQAAISEFVDALLKQERIDFAPALRRLTFDAFSVAQVGEKL  
PDQVFEDFMLLARAADARIQAKLPLKFVKPPKDFEAVKARFYGHFVDRIREARKRQDPGA  
VDLMSRYLRETPGIDDQVLAHMLGGTYFGGAFSSSVTLVGAFHQLNKYPGADARLAAEEA  
SLVADGPLTFQKVESAKWAEAVAYEALRILPAVRVMTRTPPKDAQLAGVTLPAGSMIMIS  
NQHLHRDPAHWPDPTFKPERWLDGGTTTRDPLGSGHFFFPFGRGPRACVGADFAMVFLKTA  
LTTIASRVKVQLDSTEPFEEGFFFGVVLPKGVTGKLVARTAQASLKAKVG



>COCOR\_03933|KEGG|**CYP264D1**||[Corallococcus coralloides]|ccx|DP

MSERFNLLSPEVKANPYPTYARMRREAPVCQVEPGGMWAVSRHEDVLRVLKDPQRFSSQG  
FRVATNPPWLGGNPFSESMLTMDPPQHGRRLRVLVQKAFGAGAMARLEPRVRDLCRQAVAE  
LPRGVPVDLMPPYALRIPAAVISELLGLDPARATRLKQWADLITGGVTTVRPEEEDRKQR  
ARDAVAELRQYFGEVLDARAHAPGTDLVSELQQARVDGEALSKDELIAFMALLLVGGIET  
VVHLLGASLVVLREHPEIWAQLRSDRSRIPAFIDEVLRYEPPAQAAPRLTTEAVELGGVS  
LPKGAPVLVLLGSAAHDEAHFPDGRFNLSRPGPQNLFFGHGVHFCLGAQLARMEGRALAL  
EAMLDAFRHLQAGPEPMTWHRTLTVVRGPATLPLVLHPH

>COCOR\_04510|KEGG|**CYP1069A1**||[Corallococcus coralloides]|ccx|DP

MSTAVEAVKVDGQSEAIHIDAHASKAAGAMKCPHLGAQYNPFAGPHVEDPHPFYAQLRQD  
APVSYNPMGLMWLVSRYEDICHVLKDPTRYSSADLGNMGSVLAPATLAVLAEGYPLADSL  
INSDPPAHTRLRKLLGRGFSAQRIAAQEAPIRAVSEELIQAFARKGHADLVTEFAYPLPV  
RVILGMAGVPQEDMADIKRWCDFFRMIFFTRVPAEEQPPLARSWVTFQHYVARLIRDRTD  
EPRDDLISYLVTTDADGEALTPELIIAIAGSMLAAGHETTTALLAQCWKQALLQPGLWQ  
KLREDRSLVPHLIEETLRFDSVAHGMIRTTMEDVELAGVALPKGSRLLLLYASGSRDAAL  
LADGDHFDISRHHPTHLGFGRGIHFCIGAPLARLEALIAATNLLLDQLPDLKLEENPDFGH  
TQSLTIRTITQHRLRVNWTPTGT

>COCOR\_04899|KEGG|**CYP1335A1**||[Corallococcus coralloides]|ccx|DP

MTPPTDPYQAVTHPDPYPYAE LRARGGLHRVPGFGPWIAADAATVRAVLASEHCRVRPR  
SEPVPPhLVGTAAGALFGRLVRMNDGGPYPAVKQTLSSALSLALREVEAESRRQAAWLFA  
TPSLSRLPDAALQLPVFVLGSLLGFPEDTLEASVRDVDAYVRSVAGPPAGSEGAARLNER  
VAACFQSAARTAFTARLMEGHGAEDLRLPNTVGLLTQAYEATAGLLGATLRAFARMPELR  
EQLSRGGCTMDDVVQEAA RHDSVPVQNTRRFTHAAALVAGQALEAGETVVVVLAANRDPL  
ENPQPD AFLPRRTGRQTFTFGLGLHACPGPSLATTMATAAAERVLASGLDLSPLSGPVTW  
RASTNTRVLGGLE

>COCOR\_05111|KEGG|**CYP264D6**||[Corallococcus coralloides]|ccx|DP

MSTSALEKPLAPGPAVASRPQTPGMFFNPRDPAFNKDPYPHYKRLREEDPVHRSPWGVWF  
LGRYEHVRGVLRDKRFSVQDVPQGQLRRRSELLKTRKLIPNQPANLDGLIANSENWFAFLE  
APDHTRLRLNLVSSAFQKRSVERMREQIRQCABELLEPVRKQGHMDLMKDFACILPQNVIA  
HLLGLPKEDFPQCVAWAEVIGRIFDPLVSLEEYARLNEDSISFMAYLKELVAKRRVEPKD  
DLISALIEARDGQDRLSEAE LISIIILIFGAGEETVVSLIGNGSLALIRHPEHLEYLRTH

PEVLPSAVEEMLRYDAPLQMTSRTALEDVELGGKIIRKGDQVYVALGSANRDPDQFTEPD  
SINLLRERNRHMSFADGHHYCVGAPLARIEAQEAYRVLFDTLGDFEVAIDELSYRDHTVL  
RSMVSLPVRFKERR

>COCOR\_06417|KEGG|**CYP264D6**|[Corallococcus coralloides]|ccx|DP

MTGRVNLMAPEVRANPYPVYEE LRRTAPVCQVEPGGLWAITRFEDVAAAFKNPQVFSSAG  
VRTTTAPPWLGHNPFSSEMI VMDPPHHMRLRTLVSRAWTPAAVNRLEPRIRSFARILAER  
LSPEREVD FVD AFAMPLPASVIGELFALDPTMTARYKRWSVDLSSVSGTTEKDTHRHESI  
KATVREMEDYLSNVVAERRRHQPDDMVSDLVKTRVDGEALSDAEVMSFLFLLVVAGLETT  
VQLVSHSVRMLMEQPHLMARLENPSQVGRFVEEV LRYEPSVHGLVRVTTKETQVAGVVI  
PEGARVALMVGSACRDGERFKDPDTFNMDREGVNNMPFGHGIHFCLGAPLARLEARVGLE  
VLLSRFTRFTSTGPKWNTSLTVRGPLSLPLIPHA

>LILAB\_05370|KEGG|**CYP197F1**|[Corallococcus macrosporus HW-1]|mfu|DP

MPQVRLPPGPKGHFIAGNLVAFSEDPLGFLTRCAREYGDVARLGKRNFLLNHPDLIEQVL  
VNGDGNFVKLAGVGQQRHKGGFPEAMNSEGEDWLRKRRFVQPAFHRKHVAACGDTVVA  
LTETMLQTWQAGEARDVHADVSTLALDIVSRFLFHTPIGDEARHVAAAVDAVMRHTDSPL  
RPPIWVPTPTNLRLRRALGRLNTLLATLVRRYREQPESRTDLLALLSSPEPLSEHQLRD  
ELATMIMSGHETTADALVWAWYLLARHPEAEGKLVAELETELGGRLPGAEDLPRLRYTEA  
VVKEAMRLYSPAWMTSREALRDCELGGFHV PAGTLLAVSQWVTHRDARYFDAPESEFRPER  
WLSEDAQRMHRYAYFPFGGGPRFCIGATLAMLETVLITACVARRFRLELAPGCVVRPRPA  
LALQPLGVRLIPRHRAHGARESEARHAASP

>LILAB\_09935|KEGG|**CYP1069A3**|[Corallococcus macrosporus HW-1]|mfu|DP

MPVSAQKQEETGVPAAHAQAGRCPHLGAQYNPFAGPHVEDPHGFFEQLRKDEPVTFS PMLN  
MWLVSRFEDISQVLKSPAQYSNRDMLVSGTHLTDEAKAVLDQGFPTAHVLLGMDPPEHTR  
LRRLMNRGFTAQRINGMAPFIREMASTLVDRFAKEGQADLVTQLAWPLPVHVILGVMGV P  
QEDVWRIKRWSSDWQQLVFEYVEPERQVEMAKGVIEFQQYCIRLIEDRKKNPREDLTSYL  
VAVENDGEALSMHELVMAVGASMLSAGHESTTALMANAWKVALQHGLWQRLRDHRELVPK  
FLEESSRYDSVSHAMIRTAKEDVELSGVKIPAGARLLLLFAAGSRDEALCPHANTLDLDR  
EKVPQHLYTYGRGTHFCLGAPLARLQFEITTNILLDRLPDPKLVPGQDFGTWQSLVLRQMK  
HLKVEWTPT

>MYMAC\_007011|KEGG|**CYP1069A3**|[Coralloccoccus macrosporus DSM 14697]|mmas|DP

MPVSAQKQEETGVPAAHAQAGRCPHLGAQYNPFAGPHVEDPHGFFFEKLRKDEPVTFSFMLN  
MWLVSRFEDISQVLKSPAQYSNRDMLVSGTHLTDEAKAVLDQGFPTAHVLLGMDPPEHTR  
LRRLMNRGFTAQRINGMAPFIREMASTLVDRFAKEGQADLVTQLAWPLPVHVILGVMGVP  
QEDVWRIKRWSSDWQQLVFEYVEPERQVEMAKGVIEFQQYCIRLIEDRKKNPREDLTSYL  
VAVENDGEALSMHELVMAVGASMLSAGHESTTALMANAWKVALQHGLWQRLRDHRELVPK  
FLEESSRYDSVSHAMIRTAKEDVELSGVKIPAGARLLLLFAAGSRDESLCPHANTLDLDR  
EKVPQHLYTYGRGTHFCLGAPLARLQFEITTNVLLDRLPDPKLVPGQDFGTWQSLVLRQMK  
HLKVEWTPT

>STAUR\_0027|KEGG|**CYP1494A1**|[Stigmatella aurantiaca]|sur|DP

MHLLPGPGLPPALQIARYRFQPYEFLDGCASRYGDLFTVRFPILGPLVCASRPESIRRI  
AASSEELRLGEANDIFRPLFGERSISVLDGPSHLKLRRLSVPLFQGEQSYAWTGMILEVA  
SRRTRRWRPGQHRLREEMEALTLEVILRALLGLEDPAQLRLASRHARTMVQWSASPLSA  
LLMVPALRRDLGPLTPWKGYHRDLSTLAALVMDQAARRRRARDASGRDDLRLMQEGAG  
LSDEELKDLVLMLLFAGYETTATSLCWAFAEALLSHPGERTWVERELAEVTGGGPLEAGHL  
EHLVRLDSAIKEVLRLYPVVPILGMARRAVRPFELQGVTFPAGTKLVPTSILAQRADVY  
PDPHTFRAARFLDSKPDPAWLPFGGGLRRCVGLPFALHELKAVLAHVLSQTRLRLTRTS  
PAHASLEGITVGPGRGTPVAVESVRA

>STAUR\_0257|KEGG|**CYP107CJ10**|[Stigmatella aurantiaca]|sur|DP

MALHEPLPDPVPLTGCPYKANPYFLYKRMREAGPVHRVLFPSGVRAWLVTGYEAARSALN  
DDRLLGKNHGRGNDRWRARASIMPEPQHSQQLQVHLLHQDPPRHTRMRRFVTDFTPRRIEQ  
LRPRFQALADALVDGLPEHGADLVTGFAARFPFQVLAEFIQLPPELAGRFDRDWGKVVQ  
PVGPTDPGRPLYEARLHGLQSYIAGVVAHKREHREDDLLSRLVVAHERSELSQEELGSMI  
FQLLVAGQEPVTNQITTALIALFRHPSQLARLRGNPDLLPRAVEELLRYDSAFELTTWRF  
FDRSDSLHGTRVPAGDSVIVSLCAANRDPFRFPDPTLDFDRSPNPHLAFGHGIHFPCGA  
ALARTELQIALGTLLSRLPGLHLSIRDEAIAWIPAVLGRGTNHLVPGYGRRL

>STAUR\_0258|KEGG|**CYP107EN2**|[Stigmatella aurantiaca]|sur|DP

MGREVKWVCEGSGGMAPTGLGTRYSCARPEHARHHKREGFLTTLARDKRYRCVTRVRSPL  
CRRMSTRNASRGDAQAI PGSPHYFPFVPVRALDLHPRYAELCREEPVSRVRMPFGGEAWL  
LTGYAEIKQFLADPRFSSLKATAPDTARVTPLPLRPGNLLTMDPPDHTRIRRVVAKAFTM  
RRVEQLRDRIRDVVDKQLDLLVAQGPPADLVASLAVPLPVVMISELFGIPYADREQFRYY

ADV FVATTAYDAVEIDRSRTALEQYFQELLEQRRSCPTDDL VSTLLEAMDTERLTPLETA  
RTGIGILMAGHETSLSMISNSCFLLLSHRALYAQLVAEPLLLPTAVEELLRYIPLRSTGS  
FPRRATEDVELGGVLIRKGETVIFQRASADRDERVFTCPEKIDLTRRPNPHLGFGHGAHH  
CLGASLARCELSLAIEGLIRRFPNLRLAVPDGEVPWKPGLIARCPAHLEVTW

>STAUR\_0406|KEGG|**CYP1069E1**|[*Stigmatella aurantiaca*]|sur|DP

MREPERDERGPLFIQCAVREGGAGGCVGKPPLFQNTLESPYHLGMPKTQPPVRVSPALST  
PVPSSRCPHLGDEYNPFKGPHLQAPYPFFAQLRKEEPVTFSPMLGMWLISRLEDIHEVLT  
HSASYSSASMLTSASQLTPEARAILGPGPILHDSPLNTDPPAHTRLRRLQLRGFLPARIA  
RQEASTRQLANALIDTFIHKGRVDLVEAFTYPFPMHVILNMVGVPHEDMNRVKRWCDLDF  
GLIFSQTPEEAQPSMARGVVEYRAYCADLIEKRRREPREDLTSYLVHTETGSDSLNTEEL  
VSLGGSLLIGAGHEATTAQLGLILLNLLRKPERWQALCENPALIPRAVEECIRLEAASHG  
MVRTAVEDVRIGGVMLPKGSRLLLYSSANHDEAQHPDPERYTLDRTNLHHLGFGHGVHY  
CLGSHLARLELCVAVELFTQRMFGMRLVPEQDVGYHQELLILRNISRLEVEWPG

>STAUR\_0533|KEGG|**CYP1489A1**|[*Stigmatella aurantiaca*]|sur|DP

MQTTATKIPAPKGWPLLGVAPEMPLRNPLPLISRLTRDYGDVVYMPGVDTYLISEPELVKT  
ILLDAEEYFTKSPKVMKKLSIPAIGAGLSTLSGDPWKRQRRMANPAFSRASIAATFEGIMQK  
AIAEAIVWEARAGETIDVTGEMKRLTLRIVLLCLFSTDVSSRADEIIENLDVLQRYSVH  
LLWSMMPLPEFIPTKRNEYQKARGTLDSEIYGIIAERRKSGNHDRKDLLAMYMSAVDEE  
TGEGMSDEQLRHELMNLFAGHDTTANGLAFTFYLLSKHPEALKRVDEERDAVLGNRMV  
TNEDLPQLNYARWSFEEALRIYPPTFAMSRTSVRELKHNDYVIPAGSNI FVCQWALHRNP  
RLWPNPDHFEPPERFSPERSEGRHRFAYLPFGAGPRICIGAHLARTEAQMI IAMLLQRFRL  
NSEPGYEPRLVARL FVTAEPGISMRLSRR

>STAUR\_0821|KEGG|**CYP1011E2**|[*Stigmatella aurantiaca*]|sur|DP

MNPVKLNLFDPAPFHADPYPVYTRLREEEPVHRTVMGAWVITRYADV KVLLRDNTFGVFDI  
PTRIERKSQFLERNKTGELRTLQAMRRWMLCDPPDHTRLRGLVNRSF TSPSAVEALRPR  
VQEMVDQLIARVRDTGKMEIVGELACPLAVTMIASMLGVPEEAHASVTRWADGLSRVLDP  
LRSLEQYAEMNRVAQEFLEYFRQLFAERRRNPQNDLISSLIAVTDQGDKLTEDEMLSVC  
MLFIAGEKTTVNLSINGVLALLRHRDEFERLQKDPALIRGAIDEILRYDSPVQLNTRVPK  
KDFTLHGKTIPAGDLIYFSLGSANRDP SQFPDPKFDITRKENRHLAFSGGIHYCLGAAL  
ALIEGQLAISTLAREFPKMELVPGTIDWQKEIIFRGPTLPVLLNP

>STAUR\_1562|KEGG|**CYP107DP2**|[*Stigmatella aurantiaca*]|sur|DP

MSTPDLFHELWSPEVIENPFPLYARMRQAAPVARSHHPSVAGPIWVVCRYHAAVEFLKDN  
RFAKSKQKLGRESQRRYFRVSALKHLDQHMLSADPPMHTRLRSLVAQAFTARRVEALRPR  
ITAIAEQLLDSVQQQDRVDLLDAFAFPLPITVIAELLGVPVEDQDRFREWTTFITLTPPKD  
GDVAPLRRMAQEFQAYLQEFLLARRAEPRDDLASAMIAAEEQGDRLSPVELMSMVFLLLV  
AGHETTVNLIGNGIWALLKHPEQLERLRAAPALLDSAVEEMLRYCGPVKHSTSRFTLEDT  
EFHGQHIPAGEMVAVGLVSAHDAEVFPEPERFDIARQPNRHIAFGSGIHFCLGAPLALL  
EAKLSFRLLLLERLPQLRFAVEPSTLRWRDSSLIHGLERLPVTF

>STAUR\_1628|KEGG|**CYP264A2**|[Stigmatella aurantiaca]|sur|DP

MTPQVRNLSPEFRADPHSGYAQLRRDTPVVQVEPAGFWAISRYDDVAFVIKNPQLFSSE  
GFKAAWQPAWVGYNPLANSMIATDGAGHARMRTLVSRAFNASAIQRLEARIRKLAHRLAD  
ELAQKGEADFVSQFAMPLPTFVIGELLGLDISLHHRFKGWSDDIASVTPEPLSPEYAQRT  
LTAISDATRYITEVIEARRHSPAEDLVSDLVRAEVDGQSLTTREIVDFLILLIAGLETT  
VHLLANSLFLAERPEESERLRADPTLIPRFIEEMLRYDSPVQSLVRIVTSDVTVAGVTI  
PKGVLALIIASANRDERQYPEPDRFDLHREQSSISFGYGAHYCIGAQLARMEARCGLEA  
LLSRFSRFQRTSAELTWSQAITVRGPHALPLRFTPA

>STAUR\_1874|KEGG|**CYP264A3**|[Stigmatella aurantiaca]|sur|DP

MTRRVNLSDDFRANPYPGYAE LRNSPVTQVEPSGLWAVSRYEDVAFVLDNPLLFS AEG  
IQAVWEPAWLGYNPLAHAMASLDGPRDAPLKTWVSQSFSPSALQRLEPRVRQLADILSDE  
LLSRKSTDFIASFALPLPALVLSDLLGLEASDYRLFKNWSDDFACILPKVPSEDALRLRN  
TVTRLTGHLTCLIEQRRLTPADDLISEMLRDDLPGPVPTDRERIELLTLVVAGLETTVP  
LLANGLILLAHQPELLAQLRADRTLIPSFVEELLRYDPPTQGVLRRTLEEVEISGVSLPK  
GAGVLALTGSAGRDERQYPEPDRFLLHREQSSIAFGKDSLTC LGAPLARMQARIGLEALL  
SRFEGFCLVPADLTWNKALTVRSLHALPLELTPVRAGALATSSAWVGSP

>STAUR\_2030|KEGG|**CYP120H1**|[Stigmatella aurantiaca]|sur|DP

MTTLARESELPLPPKSPSLPVLGDTLAFRLRDGPGLVETRGRQLGPVFQNLNFGQPTAVLL  
GEEANRFVLHSGTKHFNWRYGWPPHFRDLWVDTI FLEDGDPHRLRRKLLMPAFQTEAIEG  
YLPQMEKSHLAAIARWEKAGRMVCIEDFGRVTLRVANQLFLGDDTEDGAEDLPQWMKHWL  
EGFYSVPIRFPLGTFSRALAARHKLI SHVERAIHSRREKKT TDALGLLTGFKDS DGVALT  
TDQLASEMLVLVAAGFH TTTTSM LTYVMFALAEHPDVLKKARQEQRDLGIQGSVTLEQIHR

MSYLNNAVMAEIERLYAPVPFGFRRVVEPF EFHGYRIPAGWQVAWSVEGAQKDPRNYADPL  
RFDPERFTRAGSDADHRGDFKLVGFGGGPRMCIGTNFAKVQAKLLMSHLLRGYEWEVEPD  
QDLRPRFTPERTPKSGLRVRFKKRAGPPDSPA

>STAUR\_3582|KEGG|**CYP1498A1**||[Stigmatella aurantiaca]|sur|DP

MSYAVANTAFYPRYDLLDPDFPKSPYPLLHRMRTEEPVFWFEPLNTWVTRYEEVSSILK  
DPMRFSSRRADRLQAQLPSDTPSGIRQTIAHVMSLAAMFSDPPVHHLRSEANKGFSPR  
AMAPMAQRIQKVTDDELISRMEGRGEMDGFLDFFEPFALTVIGDLMGVPREDQHLFI PWTQ  
KTTKLLGGSKLTLEEAQASLRAFEEMNAYLAQALAERQRNPRDDMMSFLLAGYDPGRFPL  
EALAGMCSEIIIGGANAPTGDTLGNALLACLSPHEELEKARHTPALWKTAVPELLRYDGPI  
LFW SRLATEDVVLGGKRIRAGQMVYASLAGANRDPDVFPEPDQLDFSRPNAHKHVSFSFG  
PHHCIGAGLARMENTIVFETLFRRLPGLRLAGPVQWREGSLTTRGPTRIPLVF

>STAUR\_5213|KEGG|**CYP1486B1**||[Stigmatella aurantiaca]|sur|DP

MSTAAAIEHLPGEAGIVANVRNTLGWMRRGNEHLLEQHRRFGPVYRTVFAGYTVVCVADP  
EMVMSIARDDHSWSTALAWLTFFQGIDAKINASQIDSPLFLDFKPHRDARKILQPAFGHT  
ATAGYFDAATPIFEKAIDRWVEQGHVSFKDAIRSLLEVEVSTRIFLGVDSGAREFERALID  
YWEGPLSLRSALLSSKWRRSIRGHRVLCEMPLRSRIAERRATGGDDLFSRLCAKTQESEG  
ILDDDGLVRLVIGVMAAAFATTSSGLASMA YLLAIHPEWQEKMR EEALAVSKGRVSYEDS  
KQLEVTSRVWKETMRLYPIAPYCARRALHDVNLGQFRI PAGTFVMGLISVVMQDSALWSN  
PQRFPDRFTEERAEDKKSKASFLPFGTGAHTCTGMHLANAEAKSFWHAMLTRCRFTLER  
NYRGRHTYMPAGIVSGDVKLRVERL

>STAUR\_5214|KEGG|**CYP126B2**||[Stigmatella aurantiaca]|sur|DP

MSVEPPNRSAPLGGLHGPPSTPQPLPAVLEGFDLTDQSRFSNGFPHQVFARLRRDAPVLF  
HPPGQSIDGDGFVWLSKHADIREAAANPAFSSRGGGGRPHGGTHIDDARPELPGVLFNMM  
DDPRHQDFKDVMTPAMGRQALATLEGKLRPYAAELVSSLLARGNCDFATEVGATVGAHAI  
SQLLGIPSQDWPLFAEWTSLLMGFDDREAGRPTERSQKIHMDIFRYGCQLLA KRAGPSD  
DLTSLLAGGKLASTSGEGPISDLERQTCFCLMVLAGTESTRNMIAGGVLALAENPEQWRA  
LRADRS LVPSAVEEILRWTSPTPYNRRTATRDIRIRDTQIRAGDKVT LWWTSANRDEDVF  
SNPFSFDIRRKPNPHLAFGYGSHTCFGDHLGRLEMRVVLEALLDRVEQIELTGQVAWAGS  
NKHTVLLRMPVALTGA

>STAUR\_5220|KEGG|**CYP110U2**||[Stigmatella aurantiaca]|sur|DP

MKSAKSSREGFPEGPSAFTSVRYARDPVGLYRALTKYGDGHTVTMPLLLGPIVGAISP  
QSAKDILTADTASLDIFGPEALAMVFRPRSLVMLSGEQHARERKLLMPAFNRADAVRAYA  
VTMQETALQYASEIAVGKPFVMQKLAQRILLQVVIRDVFGVTEPDEQAEKQRVRELFEA  
SSPALIFFPGLRHRFGGIGPYANWQRADARLTRLIHDLIARRRASPPGSKVDVLSLLLTA  
RYEDGSVPSDEVVHDELMALFFAGHAATATTISWVFHWLHRYPETLAKLRAELATLPQDV  
EPTSYMKLPYLEAVCNETLRIYPPVADLYRKLRVPLRIGSTMVPAGTGVAVFTTIIHARE  
DLFPEPMRFRPERFAERSYTPFEFLPYGVGARRCIGAAFAHQALKIVVASILRRWELGLE  
TPDEPAVRQGVGVGPKHGVRMIRLNATEEQAPGATGRSAALS

>STAUR\_5324|KEGG|**CYP167B5**||[Stigmatella aurantiaca]|sur|DP

MTREAPPAVKFDPSTAEFDVNPYPMLERLRAQPALPYWEEGRGWLLCRYEDAIIVLRDNK  
RFTANRSVWEFDDELGLTHQIPELAELSQYGLFALADADHARVRKLVSPALTPRAIERLR  
PEIQAIIVDEILDGVEAKGTVNVVAEADLIIPARVIGSMLKIPKGREVQFQRTDAMIKNF  
VPGLVCAREVEAMRPDIAGGLELIRETVEDRRRHQPQEDILTTLIRTEERGDSLNAQELL  
SLVAALIVGGFETT VHLSIFTVYNLLQRPEVLAQVKAPELSNRNVEEVLRFDNFGKMGL  
ARYALEDVELGGVTIKKGQLVLVMLNSALRDEGTFSSADVFDVRRHTNASIAFGHGVHYC  
IGANLARLEVQLAVSTLVRRFPRMQLLGPPSFGPHPVLRKMESLEVQLRPQ

>STAUR\_6876|KEGG|**CYP1387B1**||[Stigmatella aurantiaca]|sur|DP

MPLSQTFHPFAPPLRDNPHPIFEEARKEEPVFFSEILKCWVTRYEDVYAVLQDSRRFSS  
AGNLAVHKESLCPAAKSLLIENQYTDPLVNEDAPVHTRRRPVYKKLFSQEAIIRSLEPRI  
RDITKELVDGFQAHQGHADIVSQLAYPLPMRVVLSWMDIPQEMMETIKRWGDWVLLLFAE  
LTPEHQMECAHMOVKLQRYIADLLAERLDQKRTDAMTQLATQLLTLEKLSIEELAGMVSG  
TVVAGNATLTSMVGLTTRVFLQQPNLWQRLREQPERISQAIDEALRLESPFWGLRRVTTE  
PVEVGGVKLPAGARVLVAFISANRDVERFPQSEVFDLDRPNASQHMSFGKGVHVCVGSGL  
AKQEVQAAMEVLLQRLPDARLVPGQELTFVPGLLRQHERLLVEWSPQRV

>STAUR\_7270|KEGG|**CYP264J1**||[Stigmatella aurantiaca]|sur|DP

MHSTADLMTPENCRNPYPLEYELRRDRPVCHVEPGGLVAVSRYKDVEHVLKHPEVFSSHG  
FRVAWEPEWVVDNPLAHGIVAQDGAEHLRLRSVAVSRAFTPVAINRLGAQVRETAQQLADA  
LLEQGEADFMDFATPLPARAMSGILGLDPSLERHYKRWTEAVVGITPVPLSEKHIHYTR  
ATIVEMKAHMQRRAIDERRQQPTDGLLGLIVRGKSDSEPLSNSQMMALCFNLLTGGETTS  
FFFSNAVRVLAERP DVYAQLRADRTLLPQFIEEVRLRYDGPVRGLPRIVTSDVELSGVRIE  
RGACVLLLVSANRDEAQFQAPNHFDLQREQKGISFGYGTHYCVGAFLARLEAQAGLEAL

LDRFSGFSLIPERLVWNRGIITSGPEKMPVRFLSA

>AA314\_00027|KEGG|**CYP109R1**|[Archangium gephyra]|age|DP

MSLLDHFDFFHPEVHNNPYPYFAELREKAPLFWTKSLQAHVLSRYEDVAYVLKNPALFSS  
VDIRVNGMRPQDRNELGELSSVTNLVNSDPPIHTRLRGLVSR AFLPKRISEMEPRVRELS  
RGLVAEMTAQGEFDFMDGLASPLPVTIIAEMLGIEISRRRDFKRWSDSLMSATAESLRTG  
KMSEEATRSAGEMFAYMKEIAEKRRLEPKGDLISLLVQSSEGVEALSPA EVNSFAVLLLI  
AGNETTTNLLGNSLLALIRHPEQYEWLRNNPSREACA AVEETLRYDSPVVGLMRRATQD  
VELGGGKVPAESTVMVLVASANHDP RKFPNPERFDPQRDTNGTLSFGHGIHFCLGAPLTR  
LEAPVALQELMERAPRLGFASRQPERIDYGSSFFLRGPRSLWLRKS

>AA314\_00028|KEGG|**CYP107HX1**|[Archangium gephyra]|age|DP

MTPEINLKTREL RANPYPTYARLRKESPVVLYKHP IFGKTYYLTRYNDIVSSFTDPRLAN  
DRRNVLGKKDPM DRWWVPKLFRI LQNNMLAKDVPDHRRLRDLVHKGFTPRRVEEMKQAV  
ERIVSELLDAAEKKPAVDLLAD FALPLPLTVISEMMGVPEEDRLTFHRQMGGLLDNLTTP  
AGFLLQTPN AFNM MRFFRKLIRLRQTEPRDDL LTALVQAEEQGDRLNEDELISMI FLLLL  
AGHETT VNLIGNGT LALLQHPEQLQKLREHPELIGSAVEELLRYGNPVDQPSPRYAREEI  
QLEGHVIPKGATVMCLLASANRDESVFENADTL DITRKNRHVAFGMGVHYCLGAPLARL  
EGTIALQHLVRRFPDMKLAVPAEQLRWRGSIGLRGLKALPLLLSPSGAPAAMREAA

>AA314\_00098|KEGG|**CYP197G1**|[Archangium gephyra]|age|DP

MLGNILAAAKGELDFFKELGSYGDVSSFHLGRRRFYFVNHPELIRKVLTSQNFVRTAISR  
DLMESFLGRGLFSQEGENHLQRRLMQPAFHHKRIEGYGAVMEGFATRMLEGWRDGETRD  
ISHDMMRLTFEIVSKTLFDADTGEQASQVGKAFTSIMQAINKEYPLYSVLP AWVPVKRWG  
ASRRAVEALNRITSTIIQERRGTGTD RGDLLSMLLLARDEDGTRMTDEQVGAQTLSLLFA  
GHETTANLLSWTWLLLSRNPDIRLKLQQEVDTVLEGRAPT VGDLPRLKYTESVVKETLRI  
YPPAWYAERAPLTDTELG GYTIPANAPIVISVYVTHRDGRFFEQPERFWPERFLGVEDRQ  
LPAYLPFGGGTHLCIGNRFALMEAQLLVAAIAQRYELELEPGLAVKPRALITLGVEGLRM  
KVKRRQPGSASPRASPASSASDSSA

>AA314\_00303|KEGG|**CYP107DL4**|[Archangium gephyra]|age|DP



MATNPPNEQQQETAPVTAPHEAPRADATHILDRTNPEFFERAHGLYSDLRALGPVVRAPM  
RGDLTAGAHAEGSPERQARDAGQERYFVTRYDESVSALLDDRLSSDFRTGLPPQQREFLN  
KAMPEEFKPIAFSLIMDPDPDHTRLRKLQPNFTARAMEALEPRVQRLVDELLDKAEQAA  
AARGEPA SERCMEFVEAFAYPLPVRVISDMLGIPEEDRAQVHAWAERLLHAETPAARADP  
QVRAGLKAFASYLEGLFERKRREPGE DMISQMVHAQEDGDRLSHQELLSMVFILFFAGHL  
TTVNLLGNGVVALLNHPEQHARFLADPAGMSKGMVEETLRYWGPVDYLPSTPRIATESFAL  
GDTQVPQGA KVSVGLASANRDPERFANPDAYDISRPDAHRNIAFGKGIHVCIGAPLARLE  
ARIAFETLFRFPKLRRLAVPESELRWGAGAAMRGFNRIPLFF

>AA314\_00471|KEGG|**CYP253G2**||[Archangium gephyra]|age|DP

MPEAR TLGEAPGPRGHWFNGNIQERRHDPLQLFLRAHQEYGEFVRLRMGPTISLISVTSP  
ELIKHVLVDHADRYGKPSSSLVRDAWPVLGNGLFTSSGDFWKRRRLMQPSFHKERLATLA  
GSMVDATRQMLARWRARPSPEPLDVAAEMMHLTLGIVGRALFSTDVSGNASRVGQALT  
V ALAETNRRILSLGLYAPDFLPTARNRAFRQALGTLDSVIFDIIARRRAGETQGDDLLATL  
MAAQDADTGERMTDAQLRDEATTFLLAGHETTANALAWLWHLAQNPEVETRARA EVQRV  
LGGRTPTAQDIPQLRYLTQVFEEAMRLYPWIMARQPVKEDVLAGVQIPASPRVIVVTP  
PYAIHRNPRLWPEPERFDPERFSPEQTAQRPRMAYLPFGGGQRLCIGNNFALMEATLI IA  
EVLQHFRRLRAVPGHTVEPEPLVTLRPGGGLPMFVEPLHASA

>AA314\_00680|KEGG|**CYP1347C1**||[Archangium gephyra]|age|DP

MASAARKLQLNPVDPENLLNPVPFYKELRENDPVHWSDVVHGWLTRHEDVMNGLRDSRL  
SADRGKVLEHQFQMMGLSPESIREVTDTFKRQMACKDGAHLKPRRQTAAAFAPQVLDSW  
RPLIHRTLVTHLDKLRDRREADLVPELFYQMPPLVIAELLGITPEDRERLQQWGEAVTQL  
TSTGAAKNLMEVARQANEGQARINQFLTNLVEERRRAPGEDLISHMLRAQEQQGMTTEE  
V VANTSLLLLAAGHLTTTDQLSNGLYELLTRPEQLALLRREPSLLKPAIEEMMRFA PPVPFV  
HRIAVDNIELRGRTIRKGDIVFLGLAAANHDPAAFKDAEYFDISRDPHQQKSMSFGFGPH  
HCLGAGLARRELEIAFSELVHRMPEMRLDAAKLPRIKCGGLLFRGFESLPVRW

>AA314\_01068|KEGG|**CYP1069C1**||[Archangium gephyra]|age|DP

MSKTNAPSGLGSEYHPLDSPQLEEPHPFLARARREEPVFFSPALSSWVVRHADISAVVA  
DTARFSSAESITVGAATMPPEVVTVLMGGYPLVPSLVDNDPPAHTRFRSLVSKAFTGRR  
L TELEPFIRTRVDELLHSFRHEGRADLFLRFAPLSSSIIAEILGIPRSDIHRFRWSDDL

STVLAAHGPVEHQVACARGVVDQRYLASALEERKTAPREDLLSDIVTGAQGMPMPMSMA  
ELVSLLMQVHFAGHETTAGLIVGAVELLLHHPEQLRALRDDPGLIAGAVEEALRMTSPVH  
AMFRTALEAVELGGVSI PKGAHIRIVYASANRDEARFHEPERFDPRRPDVKKHLAFGQGL  
HFCIGAPLARLEARLALALEALLRSLPGLRLVPGQKPGFLKNVTVRRHESLEVAWDV

>AA314\_01308|KEGG|**CYP253G1**||[Archangium gephyra]|age|DP

MTPSAPLPPMPPGHWLWGHLPERASNPLGLYLDSSQRRLGDVVRYRMGYIHVEQLTHPDHV  
KHVLADASARYTKGTVFDKTRPLVGNGLLTAEGDFWKRQRRLAQPAFHRERLAALGTRMT  
DTVAELLPAWERAADGGTLPVPVQELMRLTLTVVVRALFGVDVAPHTTTMGKAFTTAEV  
TNERIISPLPYLPWLYRLPTRSNRAFRQAVDTLDGMVRGLIAQRRAGTQAEDLLGMLMA  
ASDADTGDTFNDAQLRDEVMTLLLAGHETTATSLAWTFHLLARHPEVEATLHAEVDAALG  
GRMPTVADLPRRLRYVGCVFEEAMRLYPPIWAI PRVPQEDDVVDGYRIPKGDIVILVPYVT  
HRHPDFWPEPERFEPTRF LPENSKDRPRWAYLPFGGGQRCIGNNFAMMEAQLILTLVAQ  
RFRLREVPGVPVVPPEPHVSLRPRGPMRVERREEVPRVRVA

>AA314\_01700|KEGG|**CYP197K1**||[Archangium gephyra]|age|DP

MIAIHNEPPGPEGAWGIANVADFHADPLRFVTRCAREFGDVVRLGQDNYLLCHPRDIEHV  
FVNSQRSFAKETGQKPTWAKTGSYHHALMHTDGKDWLYKRLLQPLFKRDRVDTGAEPV  
AAAEEMIASWRPGEVRALEGDVAPLSAQVVGRFLLGSDLSANEVQRVTSFLAWSFRPLPI  
RIPRWLPTPRNLRFRWSVLQFDRAIYGLIERLRERSRGSSNLELVQQARDGEEGCLAPP  
WYPRDELAIMLLAAHQPTAIALAWTLYLMALHPEVEARVAAEVKQTLGDRRATAEDAERL  
VYTSAVIKETLRLYPVWMTARDSLQEVELGGYRIAAGVSLALSPWVAHRDPRWFADPDT  
FRPERWLDGSLEGLPKYAYFPFGGGPRLCMGAWLAKLALVLVIATVVRRYRLTLAAGAKV  
TPFAAASFLIPQGVRLVPTART

>AA314\_01792|KEGG|**CYP264D2**||[Archangium gephyra]|age|DP

MTGRPNLMTPELKANPFPLYAELRRNAPVSQVDPGGMWAVTRYDDAMAVLKNPRTFSSAG  
FGLATNPPWLGGNPVSQSMGALDPPQHGRRLRTL VNRAFTPTAVARMEPRVRDFVARVATA  
LPLGRPVDMPAFALPVPAYVLGELLGLDPSLHSQLKRWADQLTSVTAIRAEETERQEPV  
RQAVAEVRRYFSEVVELRRQRPGEDLVSDLLRARVDGEALTQDELLAFMFLLLLGLETT  
VHLMGLCVLALMEHPEVMERLRADRSVPNFVEEVLRTGAPGHGLLRLTTEEVELGGVRL  
PKGARVVVLLGSVCRDESQFKDGERFDLDRPGSQLPFGHGPHYCIGAALARLEAKLATEA  
LLERCGGISPGEGPVVWHRSMVVRGPSSI PAVLHPA

>AA314\_02215|KEGG|**CYP109D3**||[Archangium gephyra]|age|DP

MSAPLSPDVLNTPEGISNPYPAYRAFQGPNPVRYLRLPAGPLTGRTEPLYAWALLRHADV  
LAAIRDPATFSSQTPAVFKTMPKFALLHDDPPHHTMRRLVSKAFSPQRIASLSEWIGRL  
ANELLDTTGRGPVELMAAYAVPLPMRVIAAMLGVPDQDYPSEFKLWSEAVVAYVGMSKEER  
MRKMQEMAAYLDQAIAARRAQPAEDLLSALVEAKVEGEALTDLEIRGFAAVLLVAGNETT  
TNLIGNMLALLADRPELWRRAREDRLVEPIIEEVRLRYESPVQRFPRLTTRPVKIGDVEI  
AEGEIVDMVYGAANRDPISIFEDPDSFNPERPTNSQHLGFGGLGTHFCLGAPLARLEARVTL  
NAFLDRFPALGRGEGA AVRQGFAPVSLGYKSLPLVLG

>AA314\_02385|KEGG|**CYP110R1**||[Archangium gephyra]|age|DP

MSTPQLPSGPRITPVQTFRFIRDATGFFVDCRARYGDPFTAPLPVGNVVITGDPEGIRDI  
FSADPATFEPLGQLPLAPAVGDNSLLLMGGQRHKRERKLLMPPFHGERMRAYGQLMRDIT  
LRAVETLRPGGPFRAQELTQSSISLEVIIRAVFGIEEPERVRRYREVLVGYMEAYTPLMM  
AVPLRRSFGRGPWARFQRHVAELDQLLTEELATRRGHEAGHTDILSLLLAARDENGQPM  
TDAELKDELRTLLIAGHETTAIGMAWALYHLHRVPETKQRLLEELAPLGPTPDPEALTKL  
PYLTAVCDESLRLHPVVAVVGRRTVAPFTLRGRELPPGTALMAAIALAHVDPVIYPEPER  
FRPERFLERKYS PF EYLPFGGGARRCIGAAFAQYEMRIVLGTLLAMHRFSLASDTPERP  
RRNVTIGPGGGVEMVYQGPRQGA

>AA314\_02449|KEGG|**CYP1284B1**||[Archangium gephyra]|age|DP

MSPFSGQKLDKLP AHVPPELVY EYDNARDPRMLEDPHARMRSLILEAPPIFFSPCNGGMW  
FVTRKKAIVDITMNPEVYSNSFFEAAAAHAGEHAGERQDAQPGFRMLPISEDPPRHTAYR  
APLNQPLAAKTVSGLETAIRMTNELIDKVLAAGRCDFSEIAEPLPVTLMKLAGMPTD  
RLAEFRDLATQATSATVDAATRAVTFKRIAGILAEVIKARQEKREDDLISKLLDANIHGR  
NPTFEEMLGYSVTLFGLGLETVVNALSFGVRHVARQELQAKLRADPSLIPGAIEELLRL  
YGIASPPRRVMRDEVCHGVQFKKDDMVLLLLPAANYDDAAFPNPEQFILGRKEQHQTFTNT  
GPHRCVGLHLARLEMKV FYEEWLKRVPPFR LDPQAPPRFMGGFNLA VTS LPLVWG

>AA314\_02454|KEGG|**CYP107DP4**||[Archangium gephyra]|age|DP

MTASPLFAEGETLWSPHVRANPFPLYQRMREEFPAARITDPGTGMHFWLLTRYADVVSIV  
RDPRFTQDPSRLPDEVRQRYFSHKNRALTQHLVTADPPDHTRRRSLVSKAFTPRRIEELR  
PRIKELCSELLEKLMAQSGADFLKVLAFPLPIMVIAEMLGIPPEDGDQFREWTQTFFTP  
PSKDAQEKTRNVHQLFINYLEGIFEQRRQQPRDDLISALLAVQEQGDRLSAEELTSMVFV

LLVGGYETTGNLLGNGLLALLQHPEQLQRLREDRSLIPSAVEEMLRYCGPFELSILRFAK  
EDMELHGGRIQAHEAVRVNYLAADR DAGQFSEPD RFDVGRTPNKHVAFGHGHIHFCLGAPL  
ARLEAAIAFEVLLERLPELRLATAPEKLVWRPSAQSRGLASLPLAF

>AA314\_02467|KEGG|**CYP1011E**|[Archangium gephyra]|age|DP

MELLDQPAVNGGAGSGVP RAPVKFNLFDP AFHADPYEVYARLREEDPVHRTVMGAWVITR  
YADVKTLLRDNTFGVF DIPTRIERKSQFLEKKNMGELRTLAQAMRRWMLCDPPDHTRLR  
SLVNRSFTPGAVESLRPRVQEMVDRLLARVRHTGRMDIVNDLACPLAVTMIASMLGVPEE  
AHASVTRWADGLSRVLDPLRSLEQYAEMNNVAQEFLAYFRELFAERRRHPREDLISSLIA  
VTDQGDKLTEDEMLSVCMLLFIAGEKTTVN LIGNGT LALLKNRGEMERLRQDPSLIRGAI  
DEMLRYDSPVQLNTRVPKKDVT LHGKTI PAGDLIYFSLGSANRDPTQFPDPDRFDITRE  
KGHLAFSGGIHYCLGAALALIEGQVAFSTLVREFPDLELVPGEIDWQKEIIFRGPTLPV  
TFSP

>AA314\_02616|KEGG|**CYP109C5**|[Archangium gephyra]|age|DP

MMNLFSDVEVRRNPYPAYEQLRSRSPVLHEPHSDLWMVFDYESVKRALQDHEAFSSIVAPP  
SAMTSQWL VFADPPRH SKLRALLLRAFTPRAVASLEPRILALSHELLDRTMARGEMDLAE  
DFSVPLPLRVIAEMLGVPTTDLPHFKRWS DVMALGYAVAGSEEAARVQREFSEVTEEMR  
VYVRDLAGQRRET PREDLLTRLVEAEVEGERLTEDELLGFVQ LLLSAGHETTTNLLNNAL  
LCFLEHPEQLARLRAEPALLPSAIEEVLRYS PVQAMFRVTRSEVSLHGQVI PPCKMVLA  
MIGSANRDPRKFQDPDRFDISREP NPHIAFGHGIHFCIGAPLSRLEARVGLSVLLERM RD  
VALASDAPWEPRRAIHVHGPTRLPIRFTPGT

>AA314\_02730|KEGG|**CYP267A3**|[Archangium gephyra]|age|DP

MTAIPMEVADPFGLLHPERRKDPYSGYARMLREAPVHFCEPWGAWLVSR YADVNAGFRDL  
RLLSARTGQFSAGMSEEV RKMEPLARNLSSWT LFLDAPSHTRLRGLISKAFTPRMMEAL  
RPRIQALVGELLDAARGKERMEI ISELANPLPVIVIGELLGLPREDRYRLKRWS DQLAGL  
IGTGRPTQEQVTAGLNAILEFEAYFRTLIAQRRTAPTNDLLSALVHAEKGNLLSEQELL  
STCTMLLFGGHETTTN LIGNGLLALLRHPEQWELL CASPELLPDAVEEFLRYDPPVQFTN  
REAAVDMEIGGQAIRKGERV MLMAAANRDPAHFKDPDRLDVRREELRHMTLGMGP HYCL  
GAALGRIEAQETFAALMRRFPRLKLEPGATLDWVDSAGFRGLLSLPVVLGAEAR

>AA314\_02743|KEGG|**CYP110V1**|[Archangium gephyra]|age|DP

MNRLPPGPRNNLLVSLKYLREPYATLLETGRRYGDTFAWPGFAGKMVVTGHPEGVRTLFT  
ADPDTFLALGAEMPLAPILGESNLILLSGERHRAMRKLQLPPFHGARMRAYGQLMLDAARE  
HAARWTRGRPIPVHRTMQEISLQVILEAVLGLREPAERESFKTTVLEVIAALKPSFMFIK  
ALRRPLLGLSAWARFQRKREEITALFADVLRARRASPEPHEDILSLLLSARYDDGHALTD  
DELLTQMLNLIIVAGHETTASSLAWAFHFIHREPAVKARLVEELRGLPEPELEPEAVSRLPY  
LEAVCSEALRLNPVAPIIGRTLREGLTLQGYELPPGMDVGISILQVHRRPELYPEPERFR  
PERFLERGYSPEYLPFGGGARRCIGAAFALYEMKLVLAAILRTYDLLPASDAPVGVSVR  
NTTVGPRGEVGLLLA

>AA314\_03310|KEGG|**CYP1329A1**||[Archangium gephyra]|age|DP

MDGLPRPRRSPSGALPRSRPHPLPTARDIPRFPGGFLGNLSDFRHHRLKLFRDIKERCG  
EIGTIRIGPVVPVQVVTSGSISHTLLHTHANDVDGGPLVKTFFTPLVGERSLVLLHGPQHRK  
QRKLLAPSFQREQLAHFTQTMVQYTLDAIEGWRDGTDFDVHDEMATLTMRIIGKTLFDVD  
YRHETNELLGAMGQALEHIEYLTSSLVQIPLSWPTPRNRRVREALRTIDTTFRGMIRQRR  
VDHAQRKDMSSLVQVRDEEGQPIDEDQLHDDLMTIYSGHESTALSLGWTWYLLARHPEV  
LARVRQEVDTVLGGRPPAFEHLPQLRYTLQVIKESLRLYPVIFMLARAPTKDLEIEGYRL  
PKGQMVLMPPYIIHRDEKFFPDPERFDPDRFLPEREKQLPRYAWFPFGAGPHTCIGNHFA  
LMEKQLIVATMVQRLHIELVDGQEISPEVLTVTTLRPSHLKMRVEHRKDAPVSRVA

>AA314\_03966|KEGG|**CYP1248B1**||[Archangium gephyra]|age|DP

MDDISTRFNPMAPDQLDNPYPLYARMRRERPVFYSPMFDLWVVSRYADISEVERDTASFS  
SVGALDARAEPHPEVRAVLAQAYPRFLSLVQSDIPDHTRVRAVFGKALSTHRIAAMEPTI  
RATADALIDGFIRDGKADLIQQFAYALPGFIIICDLLGVPRSDMEQLKRWSDDKTLLMSAT  
APIEQQVQSAHGFIAMERYFQEQIHERRHPREDLLTMLVPQSLGGTAPLSEQEAVCNAM  
DLFAAGHETTTGLIGNGMWLLFNAREQLEAVREDLSLLPNALEEVLRVESPIRGFFRTVM  
ADTPLSGVTLPKGSRAFILYASGNRDETQFTEPDRFDIRRAEAKKHLAFGKGIHFCVGAP  
LAKLEGRIAFEQLLRRLPGLRPRTDEAPVFRPYFMLRGFEHLPIAWDVPA

>AA314\_04153|KEGG|**CYP167B4**||[Archangium gephyra]|age|DP

MSANPMNPEARPAVPFNPYAPGYDVNPHPTLAKLRAEAPLFYWEQGRGWIIISRYDDAIAV  
LRDNKRFSSSRADWEFAGMVGSAVSIPELLELNKNSLLSLSGQDHARVRKVFVSPALTPRA

VERLRPEIQAIVDELLDAAAAGKTIDVVADLAEHVPSRVIGTMLKMPKGQEALFMRFTYA  
VVKSIIPTLLRPEEVPELRTDLREGTRLLHEVIDERRRNPLENDILTTLIQTEEQGDRLN  
TQELLALVSSSLIVGGFETTMHLIAFTVFHILQRPEVLAQVKADPELLKNTIEEVLRFDFH  
GKVGVSRYPLEDELGGVKIRKGQMMILLGSLRDETAFDKAEVFDVRRNTNASIAFGH  
GAHYCIGASLARLEVQLTVGSLLQRFPELRMVKPPSFAPHPVIRQMKDLEVKLSP

>AA314\_04160|KEGG|**CYP1298A1**||[Archangium gephyra]|age|DP

MTHSFKSVPRIKESALLGSWSEFKSDRLGLVLRVMRECGELGEFHVGPVSMYFPTGPKLL  
HQILVEQADKFTTEPFMANFY PVLGRTTLPGIDGAHRRIRRIMAPAFQPKRMMAYAEHM  
VGFADEVQRGMVDGSEVEIVGVMQHLALKILAKSVFHFLEFNEDKYFFDCIHVASEYVGVR  
VSNPVQLPLWVPTPRNRRDQAAIAHLRGRARSLLLEGRQRGDKGDVLSLLLTAKDEDGTG  
LSEAELLDQILTLYIAGHETTANALSFAFMLLGQHPESQAKLQAEVDSVLGGRAPTYEDA  
PKLTYTLQVIKESLRMFPPAVFFGRAPIEDLEIEGYRFRKGQFCLLSPYAIHRNPEFFPE  
PERFAPERFTPENKKLPRNTYLPFGTGPHVCIGQYFALLEAQLVLAHICQNVNVS LVPN  
QQIRLMPLATLGPSPFVRKVTRRKTATALAS

>AA314\_04162|KEGG|**CYP1347B3**||[Archangium gephyra]|age|DP

MTGSGTPETPTPTQSLTESAARKARLNPLSPENLLNPVPFYKELRETSPVHWSEELQSWLI  
TRYDDVTNGFRDPRLSSDRGALFEYQMKALGAKSPEAFVQRNRLMMINRDGVSHLNQRRQ  
TSPGFSPQSLDVYLPARRIMRSLVEQVQDRGEMDLVQEVSYQMPLLVLVEFLGLPTEDR  
QKFKDWSKPLADFNPMPTGDPVAAANAAITASGELSNYLDRLINERRQEPGTDMSRMI  
QGGKMSQEELVANTHVMITAGHTTTTDDQLGNGLHDLLSHPDQLQLLRENPSLVKSAVEEM  
LRFNPASPFFTRIAEDFQLHGQDIKKGQLVFLGMAAANRDPKYFPDADRFDITRDNLMH  
KPMTFGFGPHHCLGAGLARRQLEVAIETLLERFPRRLRDESRKANPRAEGLVFRGFHSLP  
VRW

>AA314\_04396|KEGG|**CYP1007C1**||[Archangium gephyra]|age|DP

MPLLGEFGSQFRLFSDFIGGLSELQRHGPLVSLARGSGRCILVFGPEYVQQVLSNPSLFL  
SLEPGKNAPPGSSLRRLWTGLGTTNGEVHKKGRRLMLPAFHKKRVEGYRDDMVSLFQRM  
DGWRPGETRDLSADMRRVTLLVVTKALFGLEDEQECIAHGELLSEWFRLFGSASVQLLQH  
DWPLLPYRRVMRISEKGEAAIRDIIARKRRDGGGGHDVLSLLLEARDEDGGSLSDEELVG  
HITILFLAGHETTANALTWTLFLLDQHPDVHAALVDELQGTLRGEAPALEQLEQLPLLDR  
VIKESMRILTVPVLSQRMAAAPFEMGGYSFDAGTEILYSPYVTHRMPELYPEPARFLPER  
WKTLDPPVYAYIPFANGPRRCLGATLAMMELKLALAMMLQRYRLALVPGSRIDREVLITL

NPKHGMPMTVHAQDRRFTRAPWRGNVREMLALD

>AA314\_04497|KEGG|**CYP264K2**||[Archangium gephyra]|age|DP

MQTYDLFAPAITPADRSALFAKMRSEPGLCRVEPFGAYAAARYEDAAAILKDPKRFSSEA  
LAVTAEPAWLGPNPVAQSMLSMDPPRHTPLRALVTRAFGPAGMARLEAQVRRASETLAEA  
AVRQGEVDLVDRAFTFVLPRDIIGVMLGLDPSTFSEFRRWSTNMGLISSARTPEQYEEIRS  
VVREMKDYLTVDVIHARRRQPGEDMVSDLLQAEVEGQKLTDEQLLSFLFLLLPAGMETTSQ  
LLGNAVLTLAQHPEQLELMRADKTHIPRFVEEVLRYEPPTQLSFRMAMQDVELSGTKVPA  
GSLVLGLIGSANRDERVFDQPERFLPGREKATQHLSFGYGVHFCGLGAQLARMEARLGLEA  
LVSIRGLRLRSPEVQWLPGFTIHGPAVLPVELVAA

>AA314\_04571|KEGG|**CYP264E1**||[Archangium gephyra]|age|DP

MSQPLNLMTPEVRANPYPLYAELRRRPVCQVEPGMWAVSRYDDVVTVLKDPRRFSSEGL  
GRSFRPPWLERNPATDSLVMKDPPEHTRLRLSLVTRAFNGATLSRLEPSIRAIAEELADSA  
VRRQEVDFIAEFALPLPARVLNLFFGLEPAMALRLKHWADDLVSIPASQSPQRQEEIRH  
SLQEMERCFNALIEQRRARPGDELVSELLRGELTHEEVL SFLFGLVPAGVETTVYLLANT  
MVLSEHPRELERVRENPALIPRLIEEVLRFEPGQSSRLTTEDVELSGVRIPRGSIVV  
ALVGAAMRDESFRFPQADQFLLERESQSSLAFGHGPHYCLGAMLARLEARLGLEALFSRIG  
GFSLQRKELDWSQSIIARGPRALPLHLEPMR

>AA314\_04912|KEGG|**CYP262B2**||[Archangium gephyra]|age|DP

MPLVGALPGLLSKRDLDFLEAARQRHGDIYTLDLGFTDAIILSHPRHVQHVLVDHARKYFK  
GGALWESMRTFLGNGLPVSEGDFWKRQRRMIQPAFHQQRLIALTEKMVA/AIDSLAGWEP  
AARTGEPFDIAEAFSQMTNMVMVRAMFGSGLEADEAKQVAQALAYIIDYMMQGMVTKSLP  
EWLPVPGRARYREAIRYIDEVVLRVIERGRQRSEEDNLLSLLLHAVDGESGERMTNAQLR  
DEAVSLFVAGYETTAVGLAWAFHLMTRHPESFQRLRTEVREVLGQRVPGFADLRQLGYAR  
NVLQEALRLYSPSYWIPRTSSEEDLDGFQIPAGKMVVVFTHLIHHHPGVWEEPQRFDPD  
RFTPERSEGRHKQAWMPFGAGQRLCIGKEFSLMEGQHILARIAQRYDVSAVPGREAQVHI  
GTSIRAKNGVWVHLKPHAP

>AA314\_05283|KEGG|**CYP1347B1**||[Archangium gephyra]|age|DP

MTGSTVTDNRNLFSPENLRNPIPLYKDLRENDPVHFVEPMQAWFITRHDDVMEGFRDPRLS  
ASRGQLFEYQLQGVDPNVAREFLGTIQHQMFMKDGSEHVRLRRQTLTGFSNQKLDMMRPT  
VHRIMRELLDEVYPQGHMDLLKDIAFPMPALALAEINVLADRARFKRWSEYLADFSAP

AVGANPVELATNANQAMVEMKQLLLPVIEERRRNPGETDLSLSLMIQAEAEGRMTPEELVAN  
ICLIMFAGHTTTTDDQLCNGLYDLLTHPDQLQKLRADMGLMKSAVEEMLRYTSAPVPSITRV  
AGEDFEWHGKQLRKQQLVFLMMASANRDPSAFPEPDRFDITRDSTQQKHASFGFGAHHCM  
GAGLSRRELEIGLTLLLERLPGLRLDETRQPRLKCHSLTFRGFDSLPLRW

>AA314\_05303|KEGG|**CYP109N1**||[Archangium gephyra]|age|DP

MSLPVPQFTPEVTLDPYPFYAALREAGVPVPFVPSLMGGCYALTRQEDILSVLKNPVLFSS  
KLMAFSAMMPKELGEDVLRFLQVENNLLTSAPPLHTRLRTLVSRAFTPRRVAELEPRIRK  
LCGELLDTMLAREEFDLIPALAAPLPVIVITEMLGVEPERRPDFKRWSDDVMRAISLRSA  
SEDLGRLRESILEFHAYLETIVERRRREPRNDLISAIIEASEAEGGFLSTLDIMAFTRLL  
LINGNETSTHLISNGMVALLRHPSEWERLTADPSLLPNAIEEMLRYDSPGQAVMRLVTE  
TELAGHRLPKGSRLLLLLGAANRDPHRFPEPDRFDVTREVQGLVSFGHGIHFCLGAPLAR  
LEAKVVFEELFRRVRRVSFAPGQEGTIPWNPALFIRGPKSLRLRAERHPSA

>AA314\_05305|KEGG|**CYP109N2**||[Archangium gephyra]|age|DP

MQTPSLPPMAELLANPHPFFAALREAAPVLKVEAFMGAYVVTREHIGAVLKNTTVFSSR  
GMGFEQVLPPELGEEVLRVFRVEHNLISSDPPEHTRLRTLVSRAFTPRRVAELEPHLREI  
TRGLLDTLLARDEFELMAGLAAPLPVTVIAELLGIEPEHRQDFKRWSAILQAASFTIRD  
KSQLGQSIRQLQDYLEAAIERRRREPRNDLMGALVEASEAEGGFLSTLELIDFVRLLLIA  
GNETTTNLIGNMVALLRHPSEWERLVADPSLLPNAIEEMLRYEPPAQSVLRVTTQDTEV  
AGVPIPKGSRIIMLLLSAANRDPRRFPEPDRFDITRDAHGHLAFGHGVHFCLGAPLARLEA  
RVVFEELLRRVRRVSFAPGQEDHIAWGETFIVRGPLSLRLRAGR

>AA314\_05406|KEGG|**CYP107CJ11**||[Archangium gephyra]|age|DP

MSGIPDDTLDPVPLMGCPYKANPYPLYERMREASPVHRVLFPSGVQAWLVTGYEAARSA  
LNDERLGKNHGRGNDHWRARASIMPEPQHSQQLQVHLLHQDPPHHTMRRFVTDFTSRRI  
DQLRPRFQELADALVDGLPEHGPADLVTGFAARFPFQVLAEVIGLPPELAGRFDRDWGKV  
VQPVGPTDPGRPRYEALHGLQGYIADVIAHKREHGEDDLSRLVVARDRGELSQDELGS  
MIFQLLVAGQEPVTNQLTTALIALFHHPGQLARLRGDPDLLPRAVEELLRYDSAFELTTW  
RFFDRDSELHGTRVPAGDSVIVSLCAANRDPRRFPEPDTLDLDRGSNPHLAFGHGIHFCL  
GATLARTELQIALGTLLARLPGLHLSIKEEDLEWIPAVLGRGTHHLPVGYDQRL



>AA314\_05534|KEGG|**CYP1347B2**||[Archangium gephyra]|age|DP

MYRQLQEDDPVHWSEELQAWLVTRHEDVTGCFRDPRLSANRTQLFAEHQLGGLGPELVKD  
YLRVAEGMMLMKDGTETRLRRQANTGFTSQLLDGWRPTIQRIIDSLLDRVQERRRMDVA  
TELSEPLPALVMTELFDI PAEDHERFQROWSNDTANFFGAAGDVRSAAALRANEGSAQLSR  
YLTAAIEARRERPGEDLLSLLLRYEEQGRMSTEELVSNVAVLILTAGHVTTIDQLSNGVYE  
LLTHPEQLEQLKRQPELCKAAVEELLRYTPAVPFMHRVVAEDLELRGRTLKQGQLVFLGI  
AAANRDPNVFADPGRFDITRQNNKYVSFAFGPHLCLGAGLARRELELALRTLVCMPDLR  
LDEQRPPRLKCNSSLFRGFDSLVRW

>AA314\_05592|KEGG|**CYP120G1**||[Archangium gephyra]|age|DP

MDVSHLPLPPGSSGLPLLGETLAFVRDSGKFIEERRRLHGDVFRSHVLGDPIVFMIGPEA  
NRWIFAGENKYLNRNWHRSARKLLGQQSVAMINGSAHLERRRLLAPHFTYAAMRHFVPRI  
EALVHRHCEQWLSAAQPFKAVDALVFEVAIVLLMGESRVDAAAYMSRLFKQWAAGLFA  
AVPLDIPFTTTFGRGAAAEKEMREYLTPLVAEREKLAEQPPDTLGSLLSARDEHGRPLPRE  
TVLDELQLLL FAGHDTT VTATSNLMMLLARYPEVLERCQEQQQVAEKGPLTLES LRAMP  
YLHQVIQEVMRFI PPVAGAFRVTTQDVAYGGYRIPKGWQVSLGIRGTHQRAPWTS PERFD  
PDRMGPERNEQKPQGVYIPFGGGPRVCVGQHFAMVEMAVVSSLLVRGYQWELVPGQDLSP  
IPFPIPLPRDGLLVRFSSR

>AA314\_06132|KEGG|**CYP1007D1**||[Archangium gephyra]|age|DP

MTQPAALTGVALRGPRPLPLLGAKGNFLRFFSDPIGQSLRLHRDYGEVCALTDGDPSVLC  
LFGPAYNQVLSDRNLFHHNDKAFFPVPETARQLLSGLTSMNGELHRRQRKLMPPPFQKG  
RVEGYRDDMVALTEHALSRWTPGRTL DVSGEMTELT LQIALRCLFGIEDERQAHD LGHLG  
MDFLEGLTSPAVMMLPRALPGTPYARFVRTSNALHARLLELIRHKRTLPEGRDVLSMLLR  
AHDEDGSALTDEELLGQASVIYIAGHETTSHTLSWTLFLLSQHPRVLADLEDELSGTLRG  
AAPSVQLSRLPLLD AVVKESMRLLPATPLLFVR FATDGFQLG PLALPKGTGVMLSPFIT  
HRQPDLYPEPDRFLPERWQRLQPSLYEYLPFGAGPRMCLGATFASQEVRLVLATLLQRFR  
LSLAPEARVSCQVRGITLGPRHGLPMRVGGRDTPLPPPVRVRGDI PRIVRLES

>AA314\_06415|KEGG|**CYP167B3**||[Archangium gephyra]|age|DP

MSLQTPSQSPSVSFAPDAPGYVLDPPYPALAE LR TKAPLYYWPEGRAWLLSRYEDATAVLR  
DARRFSPNRDEWEFAAIAGSAA LIPELAE LNKGGLFALSGSDHARVRKLVSPALTPRAIE  
RLRPELQAVVDDILNDLAGRDTLNVVKDISDRIPPRVIGSMLKIPKGRET LFQRFTEAAI  
KSFLPGLLRPEEVPSLREDVREGIALVRETIEDRRRNPLPDDILTTLIQTEEQGDR LN TS

ELLSLVAALIVGGFETTVHLIGFTVYNVLKRPELLTQVKAPELLKGVIEEVLRFDNFGK  
LGIARYALEDVELGGVTIKKGQMVLLVLLNSALRDESVFPKADVFDVRRNTNASIAFGHGM  
HFCLGASLARLEVQIAVETLLKRFPALRLVKEPSFGPHPVIRKMESLEVQLNQ

>AA314\_06425|KEGG|**CYP1502A1**||[Archangium gephyra]|age|DP

MEPNAPEAAPHDVRDWRDHAFFLNLSRLCPDEVVPYMAQGRPAFLINRPEHVTHVLSTA  
QANYRNPYHPYAELAGLYQPEGSFLLRLGHRAEHRSAYTHQLTRMVESARARFRVLGESS  
SQGPVEVERELKELLCCVFAQALFGVDVAAESESFVRAVGLLEEVQANHVFARGADTGPL  
RLRYQQAVEDQQLRVERIVQGSGTMREAVEEAPERHSLVHTAIIRTLLNGYNAMATALGW  
TLHLLGQHPETQRQVREEALGLEEELLTIRDLPRLRVTRCVVQESLRLYPPAWMLGRHVR  
EEERLGGITLPTGAIISVSPYTMQRHPRVWEEPDAFRPERFLGAESRQPGAYFPFGGGM  
SCPAEHSVVGPLQLLVATLVREHQIEPVPVGTVRPRGLVSLRPSPTLRLRFLSLA

>AA314\_06601|KEGG|**CYP167E1**||[Archangium gephyra]|age|DP

MQTTSTREFGPDFVLNLDDPTFVTNPYPTYKWLREQAPVYHWRPRGDAIVFTRHKDVRAL  
LLDRRFSNDYRVWEFAQNTSAWPPEHAEYKKMMDNGLFGLADADHTRVRLVSGAFTPRA  
AERMGEIQKAVDDIIAENVKGDRANLTSVTEPLPMRVISDMLKIPDDKRAEFRAFGLAV  
IRASITFNKPEELFALIAPMPRWLQMIRELIADRRQHLEDDLLSTLITAQDSGSKLTED  
EMISLIQALITAGSDTTVHAANWALHSLLRHPDQLALLRADPSLIRNTIEESLRYDLFGK  
GGIPKFAKEELEFAGQKVRKGQMVIPFVTAALHDPEVFPEPERFDIRRDVSQTIAFGAGQ  
HFCLGAALARQELDLVVGTLVQRFPMKLLGEPEFQPHPIMRAMSKLEVSLG

>AA314\_06640|KEGG|**CYP107HX2**||[Archangium gephyra]|age|DP

MVETARVDLQREFKAPEARANPIPVYAKLRKLGPVLRSA DLFGEGFVLP RYEEVVRVLKD  
PRFANDRRNVPGGSSLD RWWMPAIMRMLISSMVLKDPPDHRRLRN LVQKAFTPVMVENLN  
GRVEQITEDLLDAAARKPVVDLMEDFALPLPLTVIAEMLGVPQSDRIPFRALIAKVLDSS  
AVTPISFIRNYPNMLRLNSFLRKLVKLRREQPGDDLVTALVQAEEGGDR LSEDELISMVF  
LLL FAGHETT VNLIGNGVLELVRHPEQLQKLREQPD LIDSAIEEMLRFTNPVGIVAPRFA  
KEDVEIAGVPIPKGSALTLLIASANLDETAFFHADELITRSPNRHVSFGYGIHYCLGAP  
LARLEARVAIPALLRRFPRLDLAVPAEKL RWRPHIGLRGLEALPLSVSLAGSAAERSAA

>AA314\_06855|KEGG|**CYP242A3**||[Archangium gephyra]|age|DP

MSHPPLVFDLLSLKAAQDSHSLYHRLRAQEPHIHWSPLQGWLTRHADISNALRDPRMVA  
GPMTGQFERLPEAARKQLPLRDAVNMMWGHTTHEGHLRFQSLLKRYFTPRTVDNLRPRI  
QSITDALLDAAAAGGSIDLQELAIPLSSVIAEMLGVPLTDEYMLQRWSRDLTAIFSA  
FDVPQLLRSQKSVMEMMNMRDALAQHRRAPSENILEVFVRAQAEGLVSEEEILSNCVLL  
LFAGHETTARLISKGMWLLFQHPEQLAKLREDASLIPQAVEEVRLRYGDVVGFIITRLTVAP  
VELGGQAMQQYQMVYLALAAANRDPEVFAEPDRFDINRKPSKHVAFGFGSFYCLGAALAR  
LEAQVFFETLLRRFPHVRPAPGTQPTWEPRLPLNRELRALPVEL

>AA314\_06918|KEGG|**CYP117E1**||[Archangium gephyra]|age|DP

MQALTNLFSRSPRKAELREGIPVLPGAVPVLGHAPYTLGNALTFLRDAESKVGPLFWTKN  
IGRYTLVCMGEPGFELLKNKVTSSSEFIREGSPDFIGDSLMSRDGASHRNLRSAMSAFTP  
RGLTASGAASIAAEVVEYSYTRLPQEPFSLDLTQGLTLDVIFRIIGIDNEELAAWNRNY  
REFVLGALPIKLDFFPYPARRARQKGQWLDLSRLSNLISKARGKPEMPGTLSALLKARDEE  
GKELTEDELIQNLRLLAGHETSASVMAWMGIVLAQQPALWEQLRDEAMAAPAMPSPPE  
ELKRHPFAEALFREVLRLYPPVSWTGREAIEDLELYGKRVPKGTITILVPVGTYGHDPKLF  
PDPERCDPTRWMGRRLPPSAIETAAGGGPHFCLGYHLAWVELVQFATGFAREVARRGMK  
PQLAPGTAEPKLTYPFGAPPKKTRIQLVPA

>AA314\_07253|KEGG|**CYP1286A1**||[Archangium gephyra]|age|DP

MQPPRIQLPPFLQLHQVAHPLRFMEESVQRHGDSFVMQFPNTPPFFFFTRDVEMVRQLFT  
GKPEDLYVGPVNRVLESVVGKNSLLLLDDQEHIRERRMMTPPFHGERMLSYGRSMREAAS  
RSIDGWPGKAFTLHEVFQDITLDIILETVFGLAEGETFTTHFHELFAFMLDMGSHNAVLY  
MSALLPAERMLKLLAVGRDPVQLGPWKVNVSRALPWTQLSRLMQEVDAYLFAEIAARRAE  
GVEKREDVLSLLMQAHDEQGQPMGQELRDEAITLLAAGHETTATTLAWAFHFVLQHPEV  
EEKLRAELRQVAGTGPLSPEQVNRLEYLDATLKETLRLVPVAPAVGRVLQRPMKVGWDL  
PAGMGVMACAYLTHRRPDLWPEPERFNPERFLGKRPSPYEYFPFGGGARRCLGMAFATYE  
MRIVFAEVLRRVKLRPATPYSFQVSRRGVTLAPRGVPVIVESRN

>AA314\_07540|KEGG|**CYP264D5**||[Archangium gephyra]|age|DP

MNLLAPKVRMNPYPLYAELRRSAPVSQVDPGGLWAVARYADVLTMKNPRLFSSEGIIRT

YRPPWISNYPMADSMVLMDPPHHTRLRSLVNRAFGASVMTRLEPRIRELAQQQLATTLPAG  
QTMDFVDFAFSIRVPIAVLGLDVGIPPSLHTRLKQWAEVMTQFTSVGPEDTGLQERIRATV  
AEAREHFQVLEERRRAPREDLVSDLLRARVDGEALTATDLMGFMFLLLIIGGLETTVHLL  
SASALKLQEDPALMARLRAEPELIPRFIDELLRHSGPVHGVVRLVTDEVELGGARIPRGE  
RLLLLMASANRDEAHFPEPDRFDLDRPGPQNLPGFGHGVHFCLGAQLARMEARLAEALLA  
RFSRLTLGEPARWNI SLVMRGPTLLPLAAHRD

>AA314\_07541|KEGG|**CYP264D4**||[Archangium gephyra]|age|DP

MSSRVNLLAPEVRANPYPVFAELRRNAPVSQVDPGGLWAVTRYADAAAVLKNPQLFASEG  
FRQAYRPAWFSDYPMADSMVLMDPPHHTRLRALVNRAFGPPVLTRLEPRIRQFVEQLAAG  
LPTGRSVDFAEESVRIPLIVMADLLGLSPEVHPRLKRWADTFGSFTGIGPNDTERQEHEM  
RATVAEARQHFFQVLEERRREPRDDLMSDLLRARVDGEALDAELMGFMFLLVVAGMETT  
VHLMNHSAIRFRDEPELMGRLRADHSLIPRFVEEILRYEPPVHGIFRVTTQETELGGVRL  
PKGARMVLVLCASANRDEAQFPGADRFNLDLRPGPQNLPGFGHIHFCLGAQLARLEARLGTE  
ALVTRFSRLSPGEGPVRWNTSLVVRGPLSLPLVAHPA

>AA314\_07542|KEGG|**CYP264D3**||[Archangium gephyra]|age|DP

MSGTERVNLLAPEIRANPYPTYAELRRHAPVSQVEPGGLWAVSRHDDVLFVLKNPQLFAS  
EGFRQAYRPPWISNYPLADSALVMDPPRHTRLRALINRAFGASVITRIEPPFVRQLAARLV  
AAIPEGRPVDFVEHFATPMPMGVIGELLGLSPEVHPRLMHWAHRLARFTSIGPNDVEKQE  
AMRTTVNEARGHFQVLEERRRNPGDNLVSDLVRARVDGESLTDTELLGFMFLLLIIGGLE  
TTLHLLSHAAHRLHLQPEVMTLLREQPILVPRFIEEVLREPPVHGMIRLATQEVELGGT  
RVPQGARVLILMGSANRDEAHFPNPDHFNLDLRPGPQNLPGFGHIHFCLGSQARLEARLA  
VEALLARFSRLTPGDGPVQWNASLIVRGPAKLPLVAHPG

>AA314\_07761|KEGG|**CYP102M4**||[Archangium gephyra]|age|DP

MSKPALSTTIPQPRPRLLGNAPDIGSETPLQNMMKLARELGPIFRLSFPGASIQVIGSY  
ELVADACDETRFEKMVTQALLHLRALGGEGFLTETEDPKWSKAHRLLPVAFSPAAMRDY  
HDGMLDVADQMLTRWARFGPETDIHVSDDMTRLTLDTIALCGFSFRFNSFYQTQLHPFVD  
SMVRALEEAGNRTRRLPVQTQLMVRTRRQFEADTGYLRELTQQLIEKRRATRPGAPRDI  
LSLMLEAVDPLTGERLDDTNIRDQLVTFLIAGHETTSGLLSFALYYLLHNPEVLQKAQAE  
VDRVFGSEPPRFEQVSQQLQYIDQILRETLRLWPTAPAFSLHAKAHDTLGGGRYPIGPDDP  
LLVLI PMLHRDPAVWKDPERFDPERFAPEVRDSIPPHAWKPFNGMRACIGRAFAMQEAT  
LVLGMMQLQRFHLSEPEPYKLRIRETTLTKPDGLKLRVRERKPASRPVAPRPTPRPAVPVS  
QPSEKAAAHGTPLLLLYGSNSGASEAFARRIASDGLARGYSARVAPLDEYTGKLPREGAV  
FIVTASYNGKPPDNARAFHTWVSQ LPEGSLEGVRYAVFGCGNKDWGDTYQAVPRHLDERL

SAAGARRLFARGEADARADFFGEFEHWYAPFWEGVGTALGVSSREVASGPLFTVEVVP  
SA  
SVELVRQNKLELATVVENRELVDMTSPFGRSKRHLVFKLPEGVTYAAGDYLA  
VLPENHPE  
LVERAARRFGVRTDAAVVLRSTRGDQASSLPTGRPLSVQELLGRHVELSAPAT  
RKDLERL  
AEKNPCPPHAMHLAALAQDAERYKKEILDKRVSVLDLLEQYDSCILSFGDFLE  
LLPAMRV  
RQYSVSSSPLAETSRCITLTAVVDAEAWSGRGRFHGTCSYLARLRPGEQA  
AAVAVRTPNV  
PFHPPASNATPIILVGAGTGLAPFRGFLQERALRHARGEAAAGPALLFFGCD  
HDPDVF  
LYR  
DELAWEQQGVVKVLPAFFRQPDGDVTFVQHRLWKERERVKALLGQGALFFIC  
GDGQHMA  
PAVRETLARIHQEAVGCSAEVATQWLSELEKQGRVVSDFVT

>AA314\_08132|KEGG|**CYP2624B1**||[Archangium gephyra]|age|DP

MSAAPPEAPTAHPTAAIGQDYNPFDPAFQSNPYPFYARARNEAPVAYCPQFN  
VAVTSHE  
LITHVLKSPTLFFSSLHNLEYTVVLPAEIEALLATGHYPHAPGLFNNDPPGH  
TRVRALFSK  
AFTAQRVAEMEAGIRTLTEGLVEQFAHQGHVLDLVAGLAHPLPMTVIADLLG  
VPREDMHRV  
KQWHD  
SWMTLFSPQTPLEEQRVAARSCVDYQNYAGLLADRAAHTGDLTTALVQARV  
DG  
ENPFTA  
AEMISQMMILLSAGHETTTSLISSLLYNLLRNPEQWQAVRDDPKLLEAAIE  
ETV  
RFTSPVQMEPRVAKKDT  
ELGGVAIPQGARLNIIYGSGNRDERAFDPETFNVHRPQPARH  
MGFGWGIHFCIGAPLARLEARVALEVLRRERLPHRLAPGFMPEYEPSFFF  
RALKKLELV  
DSQA

>AA314\_08208|KEGG|**CYP253G3**||[Archangium gephyra]|age|DP

MMTGAREAPGPRGHWFWSLRRRSESLGFLVRMHREYGDVVQWRMGPNRVV  
SLVNPEH  
VRHVLVENVGRYTKGSAQRLSTMLGNGLLTSEGPFWMRQRRLAQPAFHRER  
LMRMVGMM  
GEEVEH  
MVERWRARPDT  
SAPVEMADEMARTTLSIASRALFSTQVLGEADRVLP  
SLTVGQQ  
VVNERVLSLFPLPLSLPTPGNRAFLRARQTLDSVVFEIIARRRRGETEGQD  
LLAML  
MEAQ  
DAETGERMTDAQLRDELMTLFIAGYETTANALTWAWYLLSQHPEVEQ  
RARDEVAQVLGER  
APGPEDIPRLRYLAQVLEESMRLYPPAWVMVRQAREDDVLDGIRIPADPRL  
IVAVSPYVI  
HRQPRFWPEPERFDPERFSPDRAAERPKWVYLPFGAGQRHCIGSHFAMME  
MVLVL  
AGVLR  
RFRPRLVPGR  
TVELEPLVALRPKGGLPMLLEPVAASG

>AA314\_08399|KEGG|**CYP107EN3**||[Archangium gephyra]|age|DP

MRMPFGGDAWLLTGYAEIKQFLADPRFSSLEATQPD  
TARVTPLPLRPGNLLTMDPPDHTR  
IRRVVVKAFSMRRVEQLRDRIREV  
VDEQLDQLVARGPPADLVASLAVPMPV  
VMISELLGI  
PSADRERFRRHSDVLVSTTAYDAAEVN  
RTRTALEEYFQELLEQRRSRPTDDL  
VSTLLEAM  
DTERLT  
PLETARTGVGILMAGHETSLSMISNSC  
FLLLSQRELYARLVAEPSLLPTAIEEL  
LRYIPLRSTGSFRRATEDVELGGVLIRK  
GETVIFQRAAADRDERVFTCPEKID  
LARRPN  
PHLGF  
GHGAHHCLGAALARVELSLALEGLIR  
RFPDLRLAVPGDQVPWKPGLIARCPARLE

VTW

>AA314\_08581|KEGG|**CYP1492A1**|[Archangium gephyra]|age|DP

MNTALSVDTPTLKEYAPSTLELLTAIRREGFLGWLMTWRKHGDLIRIMGSKSLLLVT  
HPDHVRHVNVVTGRERYDKGESYDSLRELLLGHGIVTATGEDWRRQRRLMAPFFTTPRGVEK  
FFPIFLSDTQKLIHWRHQHQSGRPVEMLDMMQVTAABILHSVFSTDSGETLLRVKNS  
IETLVSHISNSQMSPLQVPMWVPTPGNLRFNRAKKLVTAYIQELIARRRAIPTEQWPDDL  
LTKMMTTTRDEESGTFMAEQLLVDNGLTMFAAGHETTARTLSFLWYALSQNPEVERRLHAE  
LDSVLGEAPPTINDLKKLPYTLQVVKEVLRLYPAAPMYARDAVADDELDGVRI PAGTRTI  
VFSYATHRHPAFWDEPERFEPDRWLPEREAQHAHAYHPFAIGPRICLGNNFSLLETHVM  
TAMLARRFKLRLKPGHVPRIDMFGTLGSANGMPMLIEAR

>AA314\_08585|KEGG|**CYP107HV1**|[Archangium gephyra]|age|DP

MQTLTQPDFKSQRFKANPFFFYARLREEAPVFRIKVPANEAGWLVTTRYDDVNQVLKHGGI  
SKDRIGSMTPEQQAKMPWFFKFFTPLVQNMLSRDPPDHTRLRALVHKAFTPRLIERLRSR  
VQTLSDSLDDTAARKGSMDLVAEYAFLLPVTIIAEMLGVP PGDYKKFQHWSNRLVSNTDM  
SDVLLSIPSVVMFTRYLRKLIARQRTSLGDDLLSALIQAEEAGDKLTGDELVSMAFLLL  
AGHETTUNLISGGTLALLQHPEQLERLRKEPGLIEPAVEELLRYASPVEVATERIARDGV  
TVSGVTIPRGDLVFAVLASANDRERHFKDPNTLDLGRDPNKHVSFGMGIHYCLGAPLARL  
EGQIAIQTLVNRFNRLRLSKPAESLKWRTGVLMRGPKQLPVKLT

>AA314\_08757|KEGG|**CYP264L1**|[Archangium gephyra]|age|DP

MTRPNIYSPEIWNDPHPFYAALRREAPVSQVEPGGMWAVTRYEDVLYVLKNPQLFSSEGF  
RPAVQPAWLQQRNPVADSILMDPPTHTRLRALITRTFSASGVARLEPYIRQSAGEIVDG  
MLARRKVDFMAEMALVLP SRAMSALLGLDPSLAPRFKTWADAVTGVGII PADDLKRRRAEL  
TGYLDELTHHLTGVLELRQREPGNDVVTDLLQARAQGGSMSDDELLGYCVLLL VAGLETT  
YDLLGMSALTLDNPDWLARLKKDRALVPKFVEEVLRFHAPSQSTIRTTTQETELGGVRL  
PKGATLLVQFVSANRDESVFPNAHRFELERTGSPHLTFGQGIHFCVGAPLARMEARLALE  
ALLEKCERLVREPGPVTNVAITTRGPAVLPLELLPA

>AA314\_09024|KEGG|CYP1007C2|[Archangium gephyra]|age|DP

MIATTPGLHAVELAGPRTTPLLGVGTGNYIRFVADQLTWLEKLSSYGPLVPLARGNTQHLE  
IFHPDYNMQVLSNPALFRALELWRTGPEDSSLRRLWTGLVSINGEVHRQHRRMMMP SFHK  
KKVESYRDAMVACIGRMLSGWKPGEV RDIFLEMRQVTLLIVTQVLFGLEDDRETLMGMML

MAEWLERYASPAVHLLPWDPKGLPFRRLMNVSERGEAAIRALIARKRAQGADGDDVLSML  
LHARDEEGGSMSSDAELVGQTNILFVAGHETTTNSLTWTFLFLDQHPEVHAALVEELEGEL  
KGAPPTIEQLERLPLLDREVVKESMRLMPPVTTAFRTSTAPFEMGGHRFEAETQLYYSPI  
THRLPELYPEPKRFLPERWLKAEPVYGYIPFSNGPRRCIGSTLALLEMKLLLSMLLPRF  
RLSLPPGTRVEPMVRATMRPKGGLPMRIHTQDKHFERPEVRGRIRDVLS

>AA314\_09111|KEGG|CYP107DP|[Archangium gephyra]|age|DP

MSTSTNRHDLWAPEARANPLPVYARMRQEAPLVRLFDPIYKVPIMATRYKDAVELIRD  
RFTKDMRKLDPSSPSKQLRSGESDVFNQHMLSVDPPDHTRLRLTLVSKAFTPRRVEELRPR  
ITAIHRLLDVQTSMSMDLLDAYAFPLPVTVIAEMLGVPQEDQDQFREWTNIVINPPLD  
GDLQNVKAGMQFAQYFQGMMAKRRAPRDDLSSALLAVEEQGDRLSPMELTSMLFLLLV  
AGHETTNNLIGNVWALLNHPEQLERLRANPALIESAVEEMLRFRGPVETSTQRWATQEL  
EFRGQVIPAGETVVASLLAADHDPEHFAEPERFDIAREPNRHIAFGFGIHFCLGAPLARL  
EGTIAINLLLERMPRLRFAEDPARLRWRDGILVNGLQRLPVA

>AA314\_09271|KEGG|CYP264F1|[Archangium gephyra]|age|DP

MSGRLNLVLPEVLSNPYPHFARLRDSDPVCQVEPGGLWAVTRYADVMHVLKNPQVFSSAG  
LQRSMLPSWLEHNPIAHSLVMDAPQHGRARALVSRAFSTSMLTRLEPALRTTAEQLVSA  
LVAQRTVDFLPALALPLPAAVGLLLGLDPSLFPFRKRWSDDLGAVSATSESDHEGQKRI  
RHTIQEMEHYLREVVAERSRAPREDLVSALLQARVDGEALNDAELMAFLFLLLVAGFETT  
VNLLGNGAVLLADQPGLLERLRAEPALVPAFIEEVLRYESPAQSTFRLTLEEVELGGVRL  
PQHSVLILLGASRDEAYVPEPERFILERPQRGNLAFGHGAHFCLGAALTRMEARVALE  
ALLPRIQRLSRGPEPLQWTPSIQLRGLSRLPVEVTPA

>AA314\_09346|KEGG|**CYP264C1**|[Archangium gephyra]|age|DP

MSQRLNLLSPEFRENYPFYARLRGESPVQVDPHGFVAVSRNEDIVTVFKDPELFSSE  
MKIATQPPWLGRNPVSEALNLAAPPQHARLRGLVSRFTQSMVSRMEPFAREVTSRLVD  
GLPRGEPVDFLSGFALGLPANIMALMMGVDPDSLQKEFKRWSDDISGVVVVAPDDVVRQAE  
VRKTLDDMEAYILALIDRRRANPGTEDLVTDLLRVQENGERLTDAEVVSFLVLLLVAGLE  
TTTYLLSHMALILARNPEWFERLRGNEALIKAFIEEVLRYEPPNHAQIRVTTRETTLGGV  
KLPAGAMVLLLLASGLRDEKSFDAERFNPERGVQANLAFGHGIHFCLGAPLARMARVA  
LGALLASFSRFEATDRVRWISLFFRAPESLPLRFIPL

>AA314\_09827|KEGG|**CYP242B1**|[Archangium gephyra]|age|DP

MSFAETYDFFSPEAVWNSRAFLHRMRTEDPVYWSAQFRGWVLTRYTDVLAAARDRLVSP  
PATGWLDRLPAELKPRFQPARDALRFWAGLSGEQDHLDFQRALKKYFTPAQMDRLRPRVQ  
RLTSTLLAETRDSEVLEVVEELARPLSASVIGELLGLPVEDRALLLRWSTDINSFFQHAD  
LESLHRGQRSLLQM DYMRPLIEERRRAPREDLVSVLVSQQEGFFAREPEAVVANCVMLL  
FSGHETTSRLISSGLLLLLLEHSGQQALLRERPELMPSAIEEMLRWEGPTSGMTRVSREPL  
ELGGRRFGAGETFVLVYRAASHDPEAFPEPDTFDITRQPNRHLSFGMGAFACLGSALTRM  
EAEVCFQALLEHLPGLRAAFETPDWVPLPPLNRRLRSLRVTGRRKA

>AA314\_10088|KEGG|**CYP1315B1**|[Archangium gephyra]|age|DP

MVRWLTGAGMQRAVFGFMRRHHPNLMWKGKRALVTRAEDVNEVLKTDVAVFGVTEIYAERME  
RTTGPFFLGMENTPQYQREATLSRAVRPEDLEHIRSMVREHAEQLIALARPAGRLDVVN  
GLARPVAVGLVD RFFGVPGDPETMKRWMRIIFWDIFLNLGNDAV TARAKAASAEKTY  
MEGLIAQRRAGLATESRDDFLTRLLRMQQDEATRLDDDARRNVGGIIVGAVDTSSKALA  
QLVNELLEHPEALGEAQGAARAGDTARVAAHAFEALRFDPHNPLLMRVCHEDYVLARGTD  
REMRI PKGTLVIASTISAMFDPEVMQHPDEFVRDRPPPGYMHFGRGLHTCYGERINHIVL  
PEVLGCLLRNLRNRASGSEGRMFEGFPDRLVVEFDAG

>JQX13\_05850|KEGG|**CYP107DP**|[Archangium violaceum]|avm|DP

MRQEAPLVRLFDPNLNIPVWVATRYKDVVDLVRDPRFTKDMRKLPDGSPSKLRRIDSMEV  
INRHLSSDPPDHTRLRTIVSKAFTPRRVEELRPRVTAITHELLDAARAGEVDLLDAFA  
FPLPITVIAELLGVPVEDRDQFREWTTTTIITPPPNGDFEPLQKAGMQFIQYFQGLLARRR  
ADPRDDLTLALMSAEEQGDRLSQELISMLFLLL VAGHETTVNLIGNGVWALLRNPEQLE  
RLRANPALIESAVEEMLRYRSPVETTTQRWATQDIEFRGQVIPAGESVMGSLLAANHDPE  
QFPEPEKFDITREP NRHVAFGFGIHFCLGAPLARLEGAIAINLLLERMPRLRFAVEPSAL  
RWRDGILVHGLQRLPVAF

>JQX13\_06265|KEGG|CYP197AA2|[Archangium violaceum ]|avm|DP

MSTSRAQLPPGPRPLPVLGSLVDYAKEPLAFIERCARGYGDVVYVNFSLSGPTYVLQHPEH  
IEHVLVTRHRHYVKDKLQQRILGGRLLGKLLTNEGDSWLRQRRMQPAFHRQRLAAYGQ  
VMVGHARRQLASWRDGEVHDVYADMMRLTLGIVIKSLFDLEAEGEAGAVGPALARVMEHF  
ARLQSVVFPDWLPTPENLGYREAVERNV FVSHLIQRRREAGGDAGDLLSLLLHVQDEEG  
GRMSDQQIRDEVLTLAGHETTSITLAFCFHLLARNPEAEAAHRELD SVLGGREPTVE  
DLPALPFTECVVKESLRLYPPAWSLSREALEEDEVGGWRI PAGAVVMNPWTVHRDARFF  
EEPEAFRPQRWAGGLEQRLPRFAWFPPGGGPRLCIGSGFAMMEARLVLATLAQRFRFERV  
PGDAVELLPSITLRPKHGVKVRLRAR



>JQX13\_10145|KEGG|**CYP253D4**|[Archangium violaceum]|avm|DP

MTSPAPSPPTTPRIATGPRGLPLIGVVRDVRKDVLGWLTRTAAEHGPVAQYRFGPGGRAYLV  
THPDGLKHVLQDHSVNYTKDHYSYAMFRRIVGDGLLTSQGETWLKQRRLAQPAFHRARIS  
AMAGQMVRATVELSEQWATSERTGEPRHAVRDMMALTLRIVGEALLGTDVRAETEAVSAA  
FNVISEQTVERFRSLRLIPPVLPTAYDRAFRRANHALREVVARVIAKRERMEDQGDLLS  
MFMLARDEETGEQMDDEHLQSEVLTMMLAGHETTATLSWAWALLHQNPDAEKKLHEELD  
AVLGGRPPTAEDI PRLVYTRRVLDETLRLYPPVYILSRKVMEDDTVCGYQILAGSSLDIS  
PYVTQRLPELWPDPERFDPDRFTPEKIAARPRYAYLPFLGGPRQCIGNNFALMEGTLILA  
TLAQRHRPRMVDGYTPTPEPLITLRPSGELPVIITAR

>JQX13\_10185|KEGG|**CYP120G5**|[Archangium violaceum]|avm|DP

MISPHGLFPQRPGDIDMTLQVDASSPSPENLPLPPGKSGLPLLGETLEFLRSSRAFIQRR  
QSQYGPVFRSHVLGSPTVFLLGPEAIQWIFAGEGKYLKNRWTPGVRQLLGAHCLSMIEGE  
EHLERRLLAPHFSYATMRGFVPTIEAIATRHFERWAALPGDFTLWPAMRELA FEIALAL  
IFGQDTVDPFPLMRHFKSWTAGLFVPVTVNLPWTTFGRALA AKKAMVGYLEQVVSERQSR  
TEQPPDLLGSLIQSRDEAGNPLTREIVIVDELQLLLFAGHDTTVTATSNLLMLAQYPDVL  
QRGREAVAGLQGGLTLDGLRAMPYLVQLLNEGMR LIPPIGGAFRVTTTRDVAYNGYRI PKG  
WMIPVSIKSAHGGSTWSAPERFDPDRFGSERNEQKKPGTFIPFGGGPRICLGQHFAMVEM  
SVMLALLLKHYTWELVPGQDLEYVQVPFPHPKSGIQLRVRRLG

>JQX13\_10655|KEGG|**CYP264D11**|[Archangium violaceum]|avm|DP

MSGRINLLAPEVRAHPYAVYAE LRRNSPVCQVDPGGYWVVTRHDDVVTA FKNPQIFSNVG  
MRVATKPEWLGHNPFSDSMIGQDPPTHTRLRNLVNRTFGPAALARLEVVRVQYAESIVAR  
IP EEQLVDFVDAFTLPLPASVIGELIGLEPSLHARCKRWADDLTSISANPQDEKRREEIR  
ATVREVETEMAAVLDRRRREPREDLVTDLLQARVDGESPGDAELMSFMFLLLVAGLETTI  
HLLGHCMRVLMERPDVLARLRADRSLLPRFIEEVLRYEPPVQAMGRLT TAETELSGVRIP  
AGARVMLLIGSANHDDTRFPDADSFNMDREGVNNLPFGHGIHFCLGAPLARMEARIGLDV  
LLSRFAGFTSGGPVEWNHSFTVRGPRVLPVVAHTQP

>JQX13\_12475|KEGG|**CYP110R5**|[Archangium violaceum]|avm|DP

MPPPQLPPGPRQLKPLQTFRFLKNATAFLSECRSRYGDPFTAALPVGDVVVTGDPEGVRD

IFSADPALFEPLGHLILAPAVGDNLLLLMGGQRHKRERKLLMPPFHGERMRAYGLLMRDI  
TLRAAEGLRPGSTLRAQDVTQAIISLDVIIIRAVFGIEEPERMRRFREALSVMESYTPLLM  
AAKPLRRSFGGLGPWARFQRHVAELDRMLSEELATRRGHEEGHEDILSLLLGARDEEGQP  
MTDAELKDELRTLLLAGHETTAIGLAWALHHLHHHPDTLERLLKELAPLGAVPEPEALAK  
LPYLGAVCDESLRLHPIIPVVGRRTVAPFTLRGRELPAGTGIMAAICVVHRDPVLYPEPE  
RFRPERFLERKFSPFEYLPFGGGARRCIGAAFALYEMRIALGTLLAAHRFALASGEQERP  
VRRNVTHAPENGAELVYQGPRHGALA

>JQX13\_12730|KEGG|**CYP1347E2**|[Archangium violaceum]|avm|DP

MASAARTLQLNPVAPENLLDPVPLYRELRSNDPVHWSEAVQSWLITRHDDVVNCFRDPRL  
SANRVRFYEDQLRGLGPDLIKDFLKGLNDQMSQRDGREHIQMRRQAAAGFSPQALDRWRP  
AIRRTAEQLVEQVRGQGHMNAVESLASQLPPRVIAEVLGIPVQDREQFLEWARPIADFN  
PAAGTDVVDLARNTATRELFAYLRRIEERSHSPGEDLLSQMLQSQQAGQMTLDQLVS  
NASLILFAGHTTTTDQISNGLHDLLSHRDQFHKLQEDRTLVRSAVEEMLRYNPVAVPFMHR  
IAAETFQLRGKTIRKGDVVFMGLAAANRDPEAFDPDRFDITRDSNHQKHSFTFGPHHC  
LGAGLARRMLEITFEVLLERLPELHLDPKQLPQLKCHSLMFRGYDSLTVRW

>JQX13\_13845|KEGG|**CYP110AV1**|[Archangium violaceum]|avm|DP

MSLPPGPRAPAVVQTLEFLKDPLGFLRRCYARYGDVFTLREIGFGTEVMVSSPALLKELF  
TGPPEVLHAGEANERIFGSITGTQSSFILEEQAHLRRRRLLLPSFHGDRMHEYGDTMRRO  
TEKAVASWPLREEFALHPMQSITLHVILHAVFGLGQAANDSTLEHLLTRTANEAVASML  
LILPPLQRDLGRWSPWGRLLHLIHQMDEALLAEIARRRREGAKPEQRDILSLLLQARYEN  
GEGLSDGELHDELVTLLMAGHETTGTSLTWAMECILSHPEVEQRLRAELDDVLGDEQLGH  
EHLTRLEYLDAVIKESIRYRPIMPTGGARLVKRPFSLGGYELPPGVVINALSVVHHRSD  
LYPEPDVFRPERFLGRRVDPYEWTPFGGGVRRCLGMAFALYEMKVVLATVLR SARLELAR  
SPVKARRRGFFIAPENGLPVRVLSRLRRAGDVPGTQEVATGGAPARSED TMGWGA

>JQX13\_14855|KEGG|CYP1069J1|[Archangium violaceum]|avm|DP

MTPSQLGLEFTPLEPHFLNDPFPFYARLRREAPVTFAPAFHFWVVSRYADVMTALKDARH  
FSSRDTLRPPVALPREVMAILEPAGYRADYPLLGDPPAHTRLRALVGKAFNQARVNALE  
PRLRQLVG AHLDTLRDGEPRAE LISQLISPLAMAVMTELLGLPTSSGKRIKWCDDEKLF  
FVPIPLDQHLRAARGVADFRRYLRELVEDRRKSPRDDLISLLQARTEGDRPLDTEELVA  
LTCVLVVFAGHETSTNLLATALHLLRHFGVWGELRKDTYLVRNAIEESLRYDSPVVGMMR

TTTEPLQLGGTSLPEGARLFLLFASANRDESVFEQGERFNIHRASAVRHLGFGHGLHYCV  
GASLGRLEAQLTLEALLERLPGLRLAPGEPVTYLPNLVHRVPRQLLVEWDA

>JQX13\_15660|KEGG|CYP197F4|[Archangium violaceum]|avm|DP

MTTLHGEPPEGAWGIANVADFHADPLRFVTRCAREFGDVVRLGQDNYLLCHPRDIEHV  
FVNSQRSFAKETGQKPTWAKTGSYHYALMHTDGKDWLYKRLLQSLFKRDRVDTRAEP  
EAAEEMIASWRPGKVRALEGDVAPLAAQVVGRFLLGSDLSANEVRRVTSFLAWSFRPLPI  
RIPRWLPTPQNLRFWSVWQFDRAVYGLIERLRERSRGSSNLELVHQARDGEDGCLAPP  
WYPRDEVAIMLLAAHQPTAIALAWTLYLMALHPEVDARVAAEVEQTLGGRRATVEDSDRL  
VYTA AVIKESLRLYPPVWMTARDSLQEGELGGYRIAAGVSLALSPWVTHRDPRWFVDPEA  
FRPERWLDGSLERLPKFAYFPFGGPRLCMGASLAKLALVLVIATVTRRYRLTLAAGAKV  
SPFAAASFLIPQGIRLVPTART

>JQX13\_15775|KEGG|CYP107DL9|[Archangium violaceum]|avm|DP

MTTNRVEAQKEPVTAAPEPGGSCPMKALREAPAVDSVLLDRESPEFMARAHAIYAELRDT  
APVVRCPFGRGLADGAHPVGSQARASGKVPGRDRLFVTRYDETVAALLDDRLSSDFRSAM  
TPEQARVESMPEEFRPVAYSILMLDPPDHTRLRKLVPNFTARAMEMLRPRIQKLVND  
LLDTAERKAAERGEAVSERRMDFVESFAYPLPVTVISDMLGIPMEDREQVHGWAEMLLKT  
DRQEAMADQKVRGSLRAFSQYLEGLFERKRREPAEDMISQMVHVQEDGDTLSHQEMVSMV  
FILFFAGHLTTVNLIQNGVVALLTHTPEQHALFMANPAGLAKGLVEETLRYWGPVDYISTP  
RIAQADLELGGTHIPKGENLSLGLASANRDPARFANPDVFDITRPDAHRNIAFGKGIHVC  
IGAPLARLEAQIAFELLFQRFPKRLAVPAEEMKWGSVASMRGFNRIPVLF

>JQX13\_16055|KEGG|CYP2528A2|[Archangium violaceum]|avm|DP

MPLPPLMGQGLPLLGHFPYIHGLGVDSFAFFMEGYRQHGRVFAVRDMKDTFAVLLGPEAN  
RFVLERETPHLSWGAAYGDEGSVMGPTAMPLLDGEEQRRRRAPMMSAFRHQNITAFGDA  
MVELARAQTAGWKEGRPVDLIGEMSELTFRVACGFLLGVEIGEDYPRFRELYKKMFTPVG  
LALQAAGLPYMQRYRDGLRRLSARWIADRRRAHPRDDIISRLLLEAGLDDDEDVISQVLVLMF  
AGHDTTKLSLTWTLALLLRHPEYLARVLAEQDEV LGDGPIDAEATRKLPLVLERAI REAHR  
LYPPASLLRRGVLEGFELGGYTIPKGWKVMYLPRVSHHLPDVFKDPERFDPDRFAPPREE  
HKQPYAMVEFGGGYRTCIGKELAMFEAKVVL SYLLRTFRFELAPGQRLDVANS GAMS PR  
HGKVKVFAKPTGRRVPLARAA

>JQX13\_18665|KEGG|CYP1284B6|[Archangium violaceum]|avm|DP

MSSFSGKKLDKIPAHVPPELVY EYDNARDPRMLED PHARMRSLILEAPPIFFTPYNGGNW  
VVTRKKAIVDITMNPEVYSNAFLVSGHAEHSGEHKDSQPGLMMLPIAADPPQHTMYRAP  
LNQPLSAKSVSGLETAIRDMTNELIDKVLAAAGRCDFLPDIAEPLPVTLFMKLAGMPTNRL  
AEFRHLATQATSSTVDPATRAGVFKSIAGILAETIKARQEKREDDLISHLLDANLN GRNP  
NFHEMLGYSIALFLGGLET VVNALSFGVRHLARDQELQAKLRADHSLIPGAIEELLRLYG  
IASTVRQVMRDEVCHGVQFKKGDTVSLLLPAANYDDEAFNP EQFIIGRKEQHQT FNTGP  
HRCVGLNLARLEMKVIFYQEWLKRVPFRLDPEKKPQFVGGFNLGITSLPLVW

>JQX13\_18675|KEGG|**CYP1284B7**|[Archangium violaceum]|avm|DP

MHADSGSQKLDKIPAHVPPELVY EYDISRDPRMLED PHARMRSLIHEAPPIFFSPCNGGQ  
WMVTRKKAIMDMTLNTEVFSSRSTGTGENPGEHKDPTGGLTLLPISVDPPQHTMYRTPLN  
QPLSAKSVARLEPAIRDMTNELIDKVLTAGRCDFLPDIAEPLPVTLFMKLAGMPTNRLAE  
FRHLAAQAASPTVDPATRAATFKHIAGILAETIKARQEKREDDLISHLLDANLN GRNP  
HEMLGYSILLFLGGLDTVVNALCFGVRHLARDQELQAKLRADPSLIPGAIEELLRLYGIV  
CMPRHVARDEVYQGVQFKKGDTVLLLLPAANYDEAAFANPEQFILGRKEQHQT FNTGP  
HRCVGLNLARLEMKVIFYQEWLKRVPFRLDPEKKPRFIGGYTLALTSLPLVW

>JQX13\_18835|KEGG|CYP253G6|[Archangium violaceum]|avm|DP

MTTPAPLPMPPPGHWLWGHLPERARDPLGLYLKSRERLGDVVRYRMGYIFVEQLTHPDHV  
KXVLADANARYTKGT VFDKTRPLVGNLLTADGDFWKRQRRLAQPAFHRERLAALGARM  
TDTITETLQTWEPAVASGRPLPVFQEMMKLTLTAVRSLFGVDVGEHTRAVGDAFTTALS  
V TNERIISPLPYLPWLYRLPSRDNRAFREAVDTLDSIVRGIISQRRVKGPAGADEDLLGM  
LMAASDADTGDTFDDAQLRDEVMTLLLAGHETTATALAWTFHLLQNPEVEATLHAEVDA  
ALGGRVPTLADLPKLRVYVGCVFEEAMRLYPVWAI PRVPLEDDVVDGYRIPKGDIVILVP  
YVTHRHPDFWPEPERFDPTRFLPENSKDRPRWAYLPFGGGQRQCIGNNFAMMEAQFVLAL  
VAQRFRRLRGVPGVPVEPEPHVSLRPRGPMPMHVERREDRSQVRARTA

>JQX13\_19770|KEGG|**CYP1263C1**|[Archangium violaceum]|avm|DP

MTLPQSPVAAVTHPDPYPYYARLVADRPLHHDRELGLWVASSAEAVTAVLSHDACRVRPV  
SEPVPRALLGSPAADIFRLLVRMNDGASHCPLKQAVSATLGTVD EARALALGRKWARRLF  
EELAPASLPGGLTDFAFRLSVHGVGELLGMPEAHLPRVADWMSDFVRCLAPASSPEQVER  
GRVAAGQLLGLFWELFARHALPAESLLSTLARELGRRSGGLDVGEAVAANGIGLMSQAY  
EAGAGLFGNTRLRVLAAPHEWRERVVANSGLLDVLRVLYDPPIQNTRRFVVRDDVVAG  
GRMRAGDVILVVLAAANRDP RVHPSPERFDPFRPERETR SFGAGVHACPG EALALALAKA

GVERVLMSRMPFESLAGAVTYRASANARIPLFEPGSARL

>JQX13\_21720|KEGG|**CYP264D12**|[Archangium violaceum]|avm|DP

MSGRPNLMTPELKANPFHLYAELRRNAPVSQVDPGGMWAVARYEEGMFVLKNPRLFSSAG  
FGLATNPPWLGGNPASRSISAMDPPQHGLRLRTLINPAFTSAAVNRMEPRVRAFAREVVAR  
LPLGSPVDMVPAFALPVPAPFVLGNLLGLDASLHSQLKHADQLTSVTAIRPDETERQEPV  
RRAVADVCRYFGEVVEHRRREPGEDELVSDDLRLARVEGEALTDDEIMAFLLMLLGGLETT  
VQLLGLCVLALMEHPDVMARVRADRSIIPRFVEEVLRTGAPGHGLLRVTTEEVELGGVRL  
PKGAPVVVLLGSLCRDEALFPNGDRFDIDRPASQLPFGHGPHFCIGALLARMEARLAVEA  
LLERCGGVSPGSEPVVWHRSMVVRGPSSIPAVLHP

>JQX13\_22375|KEGG|CYP1496B2|[Archangium violaceum]|avm|DP

MSASADIDLMSSEFFANPFPTFERLRTQAPVYFFEPFQCIFILTRGADIEAVTKNPSFSSR  
RANEMLGSLGLVREDAAESEMLATWSRLVFFQDPPRHLLRQLVMKGFTPAALERFRPRL  
ASLVERTLEKVRROGELDVVADFAEPIAINAIAELFALPEADRPRFMRWSKDLLKPTSSA  
VRTDEVNRNSVRRTSHDMVTYLRDLVEKRRAPGDDLISQFIAGEEGLNLQAGEAVIQSFQ  
MIGAGFVTSTNQLTNTVLALLKHPEQLRELRGDPGLIRGAIEESLRHEPAILSINRLCVQ  
DTEVGGTRIPQGRFVHAMTAAANRDPEVFPDPDRFDITRAPNRHVTFGVGAHYCPGASLV  
RLEVEEALRALLTFFRWELADRPYNYQGSNFQDRGPGSLHVRFPSN

>JQX13\_22385|KEGG|**CYP264A9**|[Archangium violaceum]|avm|DP

MTTQRVNIIAPEFRADPHPRYAEMRRNTPVVIQVEPAGFWAVSRYEDVAFVIKNPQLFSSQ  
GFKAAWQPEWVGYNPLANSMLAMDGAGHTRLRTLVSRAFNASAITRLEARIRKLANRLVD  
ELAEEKGEADVFVSRLFAMPLPAFVIGELLGLDVSLHHRFKDWSDDIASVTPEPRDPEHARRT  
LIAISDATRYISEVIEARRRSPADDLVSELIRAEVEGQSLTDREIIDFLVLLLIAGLETT  
VHLLANSLLFLAERPDVRARLRAEPALVPGFIEEMLRYDTPVQALVRIVTSDVTLSGVKI  
PQGDVVLALIASANRDERHYTEPDRFDLHRGQPGLSFGYGVHYCIGAQLARMEARCGLEA  
LLSRFSGFERIPAELNWGQAITVRGPQRLPLRFIPA

>JQX13\_24835|KEGG|**CYP107DP9**|[Archangium violaceum]|avm|DP

MTASPLFAEGETLWSPHVRANPFPLYKRMREDFPVARITDPQLGQHFWLLTRYEDVVS  
RDPRFTQDPTRLPEEVRQRFFGHKMRSLSRHLLTVDPDPDHTRMRSLSKAFTPRRIEELR  
PRIREICSELLEGLMAHGSGGDFLKLFAFPLPVIVIAELLGIPPEDRDRFREWTQTFFAP  
PSKDSQEKAREAYQRFFKYLGELEFQRRQQPRDDLISALLAVQEQGDRLSSEELTSMVFL  
LLVGGYETTGHLLGNGLLALLQHPDQLQRLREDRSLIPSAVEEMLRYCGPFELSILRFAK  
EDLELHGQRIQAHEAIRVNYLAADRDAEQFSEPDREFDVGRTPNKHVGFHGHGFIHFCLGAPL  
ARLEASIAFELLERLPELSSATAPEALAWRPSAQARGLVSLPLAF

>JQX13\_25725|KEGG|**CYP102M17**||Archangium violaceum||avm|DP

MRAVSASAPIQPRTPLVGNIPDVESETPIQSLMQLSREYGPIFRLTFPGRSILVLSSH  
ALVDEVCDERRFDKSVGGALKNIRDFAGDGLFTAYTNEPNWERAHRIIMPAGFPQAMRGY  
FDFMLDIAEQMLTKWERLGPADLDVTDNMTRLTLDTIALCGFGYRFNSFYQREMHPFVD  
AMVRS�AEAGERARRPLKTRLMLMTQQQYQORDIAYMHQVVDEVIRERRHNGDAATRKDL  
LSLMLQGVDPVSGQQLDDQNIRNQVVTFLIAGHETTSGLLSFTLYQLLQHPDVLARATAE  
VDRVLRDLSKRPTVEVLSKLTYLDQVLRESRLWPTAPAFGLYAREDTVGGAWPVRKG  
EPIMVLTPLMRDPEVWTEPERFDPERFSPEAVAARPPNAWKPFNGQQRACIGRPFAMQE  
ALLVLGMLLQRFQLIDHTRYQLHIKETLTLKPEGFRMRVRARGDADRPVVELRPAAA  
PQKPKWTSQPVQHGHTPLLVLVYGSNSGSSEAFQRIASDAVVQGYVPTLGTMDAYAGRLP  
HEGAVVIVTASYNNGNPPDNARAFCRWLEELQPGALSGVRYAVFGCGNRDWAATFQAVPRH  
VDERLAAAGAQRLLARGEADARADFFGDFDQGWYQGVWPRLGESFGVETAEANQAPRYEVE  
RLEQAADPLELAHGVPVEVVANRELVDMTSPFGRSKRHLEVRLPEGVSYRTGDHLAVLP  
ENAPEQVERVARRFKLSPDETTLIRRTREEPGTLPFDRPVTVRALLGRYVELSAPATRR  
LQLLAKYTACPEKKRLLALAGEGGAEPEVYRTQVLEKRLSVIDLLEEFQACELPFGVFL  
ELMPPMKPRRYSISSPLEAPDRCTLTAVVDAPAWSGRGRFQACSSYLTRVEPGTRIH  
AVLREPHAPFRPPEDPSVPVIMVGAGTGLAPFRGFIQERARLAERGTRLGRALLFFGCDH  
PDVDFLYREELEAWQRQGVVEVYPAFFRQERDGVTFVQHRLWEERERVGVLLDAGARLYV  
CGDGRYMAPAVRETVARIHQERTGCTAEQATAWVRELETQGRYLADVFGG

>JQX13\_28490|KEGG|CYP264D14|[Archangium violaceum]|avm|DP

MTVRLNLFAPEFRANPYPFFAELRRQPTLSNVDPLGFWAVSRYADVLHVLKNPQLFSSTG  
NRAPAEPEWLGRSNPFADSMVMVDPPTRLRLALVNRSFGPTALSRMEPRIRAYAEQAAA  
ELTLGRPVDVFVESFALRVPAAVIGELLGLDASLHPRFKRWADDINNTSSTPPDAHEWHAQ  
IRGTYAEMEQLKEVIAERRRAPREDMISDLLAARIEGEALTDALLGFLFLLLIAGLET  
TVHLLGHAALVLAERPDPVFARVRADRSIPRFIEEVLRYEPVAQTLLRLTTAETELGGVR  
LPAGSHVMLLLGSACRDEAQFPNSESFDLDREGSQSMPFGHGHGFIHFCLGAPLARMELARL  
NALLDRCGGLVRDAAPVQWHASIVVRGPTVPLPLTVLPG

>JQX13\_28950|KEGG|CYP267A4|[Archangium violaceum]|avm|DP

MPMEVADPYGLLSPERRQNPYPFYARLLREAPVHFSEPWEAWVVTRHADVNAGFRDMRLS  
SVRTGMFSQGMPEEVLRLKLEPMGRNMAWLLFHDAPSHTRLRSLINKAFTPRMVEALRPR  
IQALVEELLDAARGKERMEVISELANPLPVIVIGEMGLPREDRYRLKKWSDKLASLIGT  
GRPTLAEVEGALGAILEFEDYFRPLLARRRTQPGNDLLSALVQAEEQGNLMSEQEVLSTC  
TLVLFAGHETTTNLIGNGLLALLRHPDQWELLRGAPELLPDAVEELLRYDSPVQFTNRVA  
AVDLEFGGHTFRKGRVILMIAAANRDPAHFPEPDRLDVRREQLRHQGFQGMGPHYCVGAA  
LARVEAQETFAALLRRFPRMQVAPGVLPEFVDNVGFRGLQSLPVVLEPAA

>JQX13\_30100|KEGG|CYP264D13|[Archangium violaceum]|avm|DP

MSNRVNLLAPEVRANPYPVYAE LR RNAPVSQVDPDGLWVVARQADVLT VFKNPQHFS SDG  
IRQAYRPAWLDPYPLADSM LVM D PPHHTLRRAIINRAFGTSVVARLEPRIREVAHQVVAS  
LPVGRSVNFVD AFSI WVP IAVLGEMLSLPQSLHPRIKHWA E VYGEFTSIGENDTERQKTI  
LETVAETR FHFNQVLEDRRTPRDDLVS ELLRTHVNGEELS YTDLMGFL FLL LIGA LETA  
VHLLSSCALMLQE QPELMARLRAAPT LIPRFID EMLRHSGPAHGLFRLNTDEVELGGVRI  
PRGARM LLL IASANRDEAAIPDPDRFDMDRPGPQNLPFGHGIHFCLGAQLARMEVRVALE  
ALLARFARLT PGDGPIQWNASLVMRGLTQLPLVAHLP

>JQX13\_31565|KEGG|**CYP1248B6**|[Archangium violaceum]|avm|DP

MLDHNAPAPDDVSADFNPLAPDQIDNPYPLYARLR RRPV FHC PMFDLWVVTRYADISEV  
ELDTARFSSVGALDARAEPHPEVRKVLEQGY SQFLSVVQSDPPDHTRVRAVFGKALSAHR  
IAAMEPAIRATADSLIDGFIRDGQADLIQQFAYALPGFIICDLLGVPRSDMEQLKRWSDD  
KTALMSATAPIEQLVQCAHGFIAMERYFKEQLHERRRHPR EDLLTLLLPQSLGGTAPMSE  
QEAVCNAMDLFAAGHETTTGLIGNGMWLLFNAPDQLEALREDPSLLPNALEEMLRMEAPI  
RGFFRTVMADSTLGGVMLPKGARAFILYASGNRDETQFTEPDRFDIRRADAKKHLAFGKG  
IHHICIGAPLAKLEGRIAFEQLLRRLPGLRLRTDVAPVLRPYFMLRGFEHLPITWDVPA

>JQX13\_32710|KEGG|**CYP1043A11**|[Archangium violaceum]|avm|DP

MPDVNLNRPVANTLASRLPVALIGLRNRIFTRINGEEGIPIPGERVGVSHFKELYSNPAA  
DGRSEGAVLSDLFWYWLSPGA EIHQEHL EPGERYEEVAQATTRILSLPKKTAEELAARCT

VRVLEERAMHRATLVRLRDLMMPIWAEFYELVFNERCPREARDLIVDNADDVVTALKGL  
SLRHMDRRLRLTRYLKARLEAGAVAHLPSCLSLEQKAFYLQGVYFNTAVVQMSEAMAH  
VMFLAQHQEVQTRLADNLDDDRYLDRIITESLRLYPLFGIAHRITSSDIRVDDKTTLPG  
SVLCFNYQAYHHEGFEDPLRFPDRWLKHSTKESNYMPFGAAANRPCPAQAIALVTMR  
AVARETIRRFRAFSSASHTRPLPNRGPCVLEPRKENPDPRAREELLASMSAREPWEEVGRSV  
LQLVLGTYMVLDAKRLRLCQRYFEAERQASTTGAKASRCPFSSHS

>JQX13\_34720|KEGG|**CYP242A7**||[Archangium violaceum]|avm|DP

MKPAPeIAMLNANVVTSPRYEFFSPEAIANSQSLLSRIRSEDPVHFSDQLGGWLVTRYAD  
VMAALKDPRFLQATGTGRLDAMPEAARQQLRPLRDSIRLWMGNDSTEDHLRFQRILKKYF  
TPGTLEALRPRIQELTTELVDAAARARGRAEVVSELAYPLPANVIAEMLGVPTKDRELLQR  
WSRDLLPIFTASSMEQLLSQKSVLEMTDYM RPIVEEHRREPRQDLISVFLAEEAAGNIR  
DVEEIAANCVLLLFAGHETTANLICNGLSALFDFPDQLELLRAKPELMQSAVEEMLRFSG  
IGGTITRVAGTDLELGGKKIAPRQLV FVSLASANHDPEVFPEPSRFDITRKTNKHVTFGY  
GSYYCLGAALARLEAQVFFSTFLPRFPNRLVLDRAWEPSPLGRRLTALNVSF

>JQX13\_34870|KEGG|**CYP1329C1**||[Archangium violaceum]|avm|DP

MPKALPRLQEPPPLIGSLRSFRNERLELFNRVRRECGELGLFRVGPLSIMLVNSSRALQEV  
TSLHADAFEGGLAVNALLPIFGRYSLVLLPNKEHRTYRKIMAPTFQPRRVSMFAEPMVKA  
TLEAQARWTDGQEIDVGQEMLRRLTMRIVGKTLLGLEVLDEADDFGAALTTCLEYSNHLVA  
NIVPVPLWLP TKRNRELKKALAFIRGMLMEKLSSRRHAGCPATQDFASMLMGVRGEDGQG  
LSDEQLRDNLIFIFSAGYETSANTLAWTWYLLSKHPEVYERLRKEVDEV LQGRAPTYEDL  
ASLPYVHQVVKEVMRIYPVAYFFGREARRDVEIDGYQVPKGTFAAVCPYTLHRNPEYFPD  
PERFDPDRFAPEQESKLPKYAYLPFGAGVHACLG VHHFMIEAPLLLATLVQRVHIDVLP  
GQTVKPVVEVT LRPSRILARVHRS

>JQX13\_36270|KEGG|**CYP264K4**||[Archangium violaceum]|avm|DP

MRTYNLFDPAVLADPHAVFAQMRSEPGLCRVEPFGAFAAARYEDAAA ILKDPQRFSSEAL  
AITAEPPWLGPNPVAQALISKDPPNHARLRALVNRAFGPAGMARLEAQVWKVSEELAEAA  
VRRREVELVDAFTFVLPRDIIGYLLGLDPSTFSNFKRWSLAMGLITSATTPEQHEEIRFV  
VREMKGYLTEVIEARRRQPGEDMVSDLLRAEVDGRKLTDEEILSFLFLLLPAGMETTSQL



LGNAI IY LARHPEHLARAREDKTHIPRFVEEVLRYESPVQLSFRMATQDVELSGTKIPAG  
S FVLGLVGSANRDERVFEQPD RFLPGRDKGTQH LTFGYGIHFCLGAQLARMEARLGLEAL  
VSRVGAIRLRSP EVQWLPGYTIHG PATLPVELIPA

>JQX13\_36820|KEGG|**CYP264E1**|[Archangium violaceum]|avm|DP

MDQPLHLMTPEARANPYPLYAEFRRAVCQVEPGGMWAVSRYDDVVTVLKDPRRFSSAGL  
GQSFLPPWLERNP TADSLVMKDPDPDHTRLRAMVSRAFSGMALSRWESRIRDIAEELAEAA  
VRHQEVDFIAD FALPLPTRVLNLFFGLEPAMALRLKGWADDLVSIPASQSPQRMEQIRH  
SLAEMERCFNALIELRRADPGEDLVSELIRTEALTHEELLSFLFGLVPAGVETTVYLLAN  
TMLVLSEHPRELERVRENPTLIPRLIEEVLRYEPPGQSSRLTTEDVVLSGVTIPRGSVV  
VALIGAAMRDEGRFPQADRFIIDRENQQLAFGHGPHFCLGAMLARMEARLGMEALFSRI  
RGFTLARRDVTSQSIIARGPLALPLRLEGPLR

>JQX13\_38215|KEGG|**CYP152E5**|[Archangium violaceum]|avm|DP

MGGMPRDSRLDSTLALLSEGYRFIGNGCARHRSDVFETRLLLLRPTLCMSGAEAAARMFYDS  
ERFQRRGAAPLRLRKT LFGMGGVQGLDGEAHRSRKAMFMSLMSPDGIRRLSEQA EKHWR A  
SIREWERKGR LVLLDEVQQLCRVVCEWTGVPLPEAEVIQRTRELTALIDGSGGVGPRHW  
RARLMRMRSEAWLGRLVSRVRAGRHAAP EGSALRTVAEYRGPDGKRLGPRLAAVELLNVL  
RPTVAVARFVVFEALALHEHPESRAWLLEEEDDDAYEHFVQEVR RYYPFFPF AAARVRD  
FTWKGYHFPRGRRVLLDLYGTNHDVRLWERPHEFRPERFRTWDGSPFSFI PQGGGDHHTG  
HRCAGEWSTIALMKVAARMLTRGMRYDVPSQDLRV DLSRI PAEPASRFVIANVRDAREPP  
HERAAA ASTAGRKAVALPGPESPRGV

>JQX13\_38560|KEGG|CYP1224J3|[Archangium violaceum]|avm|DP

MLPPGPALPSPLQMSLYMADPLSFLRKQRKRHGDTFTLRMSGMGFEV FVSAPEDIKRIFN  
APPDALHAGEGNAVILPLVGSSSLVMQDGAEHIRLRLLLLPPFQGERLHTYAGPMRETH  
ASLEQWPVGKPFPLPRMMSLTIEILLRSVFGIEGKEELALFARRFPRLVDSIASPLYLI  
PALSGVDV FQKVPWLRASKMKREVDEAIYALIAHRAQPADPRRQDMLSLLLESRDEAGQ  
PLTDREL RDALFTVIVAGYETTAIGMCFTVERLLSTPEALARVHEELERVVGDT ELQAEH  
LGQLEYLDAVIKETLRLRPVVPLVSRRTKVPFELSTYTLPPETMLVPGIALTHLREDIYP  
EPDSFQPERFLGKKPDYAWLPFGGGSRRCLGMALSLFEMKVVLATMLRRAKLRLASKRP  
IHMVRRSIMFAPSRGMPVVLDEV RPRFQGPQKQVA

>JQX13\_39850|KEGG|CYP1224J2|[Archangium violaceum]|avm|DP

MPTPLPPGPRLPGPVQTALYLSQPLHYLRQWHQQYGEAFTLRMAGAGNMVFISSPQDIKR  
VFNAPMEVVHAGESNSLLRPFLGPHSVVILDEWDHVRQRRLLLPFQGERMQAYAEVMRE  
VTHASLERWPMARPFPLLDVMTTELTLELMLRNVFGLETPEEIAAFSRDFSSLVDSTNSPL  
RMLPSLIGMDLFTLLPWARASRLKRRVDAAIYALVARRRAEPRRPERTDVLGLLLESTHE  
DGKPMSDQELRDALLTLIVAGYETTAIGLSFTVERLLAEPRTLTRMHEELERVVGDELG  
PEHIGQLEYLDATIKEALVRPLVPLISRQLKGPLELTHYTLPAAGVTVLPAIVLTHFRED  
LYPEPEHFKPERFLEQKPDOPYAWLPFGGGARRCLGMAFAMYEMKVVLATLLWRAKLRLAS  
SEPVPMINRHIMLAPGGGVPPVLDEVARRREGPRRTG

>JQX13\_41630|KEGG|CYP109N4|[Archangium violaceum]|avm|DP

MQPQALKLTPEMVANPYPVFAALRESAPVHYVEAFRGSYVLSRHEDMAPVLKNTTLFSSK  
MASVSALMPKELGEDVLRYPFRSENSLLSSDPPQHTRLRLTLVSRAFTPRRVADLEPRIREL  
TRELLDAMLTRQEFDLADLAVPLPIIVIAEMLGIEPERRLDfKRWSNAISQSVTLTVGG  
LDLEWIATGIREIHAYLEAAIERRRQEPGNLISALVESNEQQGGFLSSMDVIGFVRLLL  
FAGNETTTNLIGNGTALLNHPAEMERLAEDASLIPNAVEEMLRYDTPAQVIFRITTADT  
EIAGTPIPKDSRIMLLLGAANRDPKFPDPTDFDITRDTQGHVAFGHGVHFCIGGPLARL  
EAKVVFEELFRRVRRVSFAPGQEGHLDYGTTFSLRGPKSLRLRAERR

>JQX13\_41680|KEGG|CYP1347B6|[Archangium violaceum]|avm|DP

MSSAAPTLDRLNVSPQNMLNPFPLYQYLRENEPVHWSDAVHAWFLTRYDDVMAAYRDPRM  
SANRAKLFYQVQGLSPDITREFMQTVRNQMFMRDGPEHVRLRRQTGMGFTPQRLDELRLP  
TVHRIMRELLEQLASRHEMDLVKDLAYPLPALAIAELLGVPPEDRDRFWVWSEHLALYSS  
PPVGADSQLLASNANKTMVEMKEYLLPIIEHRRQSPGTDGLSQMLLAQEQQKMTPEELVA  
NACLILFAGHTTTTDDQLSNGVYDLLTHPDQFQMLREDMGLLRSVEEMLRYTTSVPAITR  
IASEDIQMHGKTIRKGDVFLVMAAANRDPSPVFPDPERFDITRDSYHQKHISFGFGAHC  
MGAGLARRELEIGISMLLERLPNLRLEDETKPPQVKCHGLSFRGFDLSLPVRW

>JQX13\_41805|KEGG|CYP109R10|[Archangium violaceum]|avm|DP

MSLLERFDTLDEVIRNPYPYFAEMREKAPLFWIERLQAHAVSRYEDAAYILKNPALFSS  
ADIRIAGKLPSESSLELGSVSNLLTSDPPIHTRLRGLVSRAFVPKRISEMEPRVRELTK  
GLVAEMTAHDEFDLMDGLGSPLPVTIIAEMLGVEPSRRRDFKRWSDSLVESGAEIIRDGK  
ASDKNIRLQGEMLAYMTEIAEKRRREPRGDLISMLVQGGEGAEPLTPKEVNSFAILLAA  
GNETTTNLIGNALVALIRNPEAYEWLRRDPTIAACAAVCEETLRYDSPVLGLTRRTTQEV

ELSGGKLPADSTLVVMVASANHDPKFPNPDRFDPQRDTTGLFSFGHGIHFCLGAPLSRL  
EAPVALQELMARAPRLGFAQRQPEHIDYGMSFFLRGPRSLWLRKN

>JQX13\_45100|KEGG|CYP167B1|[Archangium violaceum]|avm|DP

MSANPTNPSETRPSVQFNPYAPGFDANPYPALEKLRTEAPLFYWEQGRGWLVSRYEDAVA  
VLRDNKRFS PDRAEWEFASVLGSAAMVPELAELNKNGLFALNAQDHARVRKLVSPALTPR  
AIERLRPEIQAIVDEILDGVAAGRLDVVNEFAERIPARVIGSMLKIPKGREELFQDFTN  
AVIKNVLPGLVAPEEQELLRRHIREGIALVGETIEDRRRNPLESDILTTLIQTEEQGDKL  
NKQELLSLVAALIVGGFETT VH LIAFCVYNLLQRPEVLAQVKTEPELLKNFVEEVLRFDN  
FGKLGISRYALEDVELGGVRIKKGQMLLIMLNSALRDESTFDKADVFDIRRN TNASIAFG  
HGAHYCIGANLARLEVQIAVGTLVRRFP ELRLVKPPSFGPHPVIRRMESLEV DLRSPSA

>JQX13\_47220|KEGG|**CYP1833B1**|[Archangium violaceum]|avm|DP

MPTAVEFEPLHPETLRDPYPVYARMRALAPVMWHERLNSWLLTRHAECLQVLKDSRRFAA  
DWRRVGAAPVEQSLSIQSMDPPEHGELRGLLV SAYRAQDLAAVERRAYLHANHLLAGLRA  
EGGGELMTRFAAPLALHAVCDFLGVPAPDPATFGEMSDAIIRGMDAGLAPERAAPGAAAR  
AGLSALIASWFEPPTGGMFGFLARSESAAGMPRAVL MN SMRVVFHAGYTSVYSAVGS AI  
ISLLRHGMELSR L RDPALLETAVEELFRYDGPVQATGRVCTEDVELGGVRIARGQALVLL  
LGSANRDPEAFSQPEALVLD RQPNPHLAFGWGIHACVGGLLAKAVVRLALCSLIEHAPGL  
RLSGDVVHKPQATQRC PDRIPIAFGA

>JQX13\_47720|KEGG|**CYP109N5**|[Archangium violaceum]|avm|DP

MQSPPTHPLLNRDVLANPYPVYAQLRESAPVHYIEPPLGMYVICRHEDIGPILKSPAMFS  
SKGMELSRRTTSKLSPEVLALVTPENSLIASDPPIHTSLRNMVGRAFTPKRVAELEPRIR  
EITVELIDDMLRKDEL DL MEDLAAPLPVTVIAEMLGVEPERRREFKRWSDDA ISSSNLSL  
ADTDPSRLEVGV RALHEYMRQAIEERRRS PRGDLISALVEAGGKEDFVTSNDLVAF CRLL  
LIAGNETTTNLIGNGMVALLRNPAWEKLVADPSLVPNAVEEILRYDSPVQGIFRETTQE  
LQVGQTLP EGS RVMTLFGSANRDPRKFQEPERFDVTREVQGHYSFGYGIHFCLGAPLAR  
LEAKVAFEELLRRVRRFEFASSPVESLEWNNNLFLRGPKSLRLKARLR

> JQX13\_49065|KEGG|CYP117E4|[Archangium violaceum]|avm|DP

MQALTNLLFQLPQKETHRDGIPILPGGLPLVGHAPFNIGSPLTFLRDAASKVGPLFWMKN  
MGGWSLVCMGEPGFELLKNRVTSSEFIREQAPDFIGDSL SRDGVPHRNLR SAMSGAFTP  
RGLTSSGAAAI SAEVIEASVAGLPQQGPFSLAETQKLALDIIFRIMGIDRSELEAWN RN  
YRDFVLGALPVRLDLPFSPARRASRGRRWLDARLADLISAARGKPD MKGT LAALLTARDE

EGNALGDSDLIQNLRLLAGHETSASVMAWLGIVLAQRPDLWEKLRDESMAAPGLPRSP  
DELKRHPFAEALFREVLRYPPVAFTAREATEDLVHGRVPRGTMITVPIGTYGYDPAL  
FSEPEYFDPSRWMGRRVPPSAIETAAFGGGPHFCLGYHLAWMEVVQFAAAFARELTRRGV  
RPQLAPGAAPPRLRHMPFGQPPKKTRIELARAA

>JQX13\_51560|KEGG|CYP1286A2|[Archangium violaceum]|avm|DP

MLPPRIPRPALFQLFQWTAHPIGFMKKATERHGDCFLARFPKSPPVVFTSDPEMIRQLFT  
GKPEDLHAGEANRLAEFVVGKNSLLLLDGKEHIHERRMMTPSFHGERMLSYGLSMRESAD  
RVIDRWPVGRPFSLHAQFQDITLDVILKTVLGLSEVESLERFRKLLVRMLKLSHPSLLF  
LSALLPAERMHKLLSLGSKPLRLGLPKADMSQAMPWTRLSRLTQEVNTSLFAEMAWRAV  
GVEGREDILSMLMQARDEDGRPMSDQTRSCATR

>JQX13\_51845|KEGG|CYP242A6|[Archangium violaceum]|avm|DP

MQQATNPQPLTFDILLSLETARNPHPMYHALRTQQPILWSPQLHGWLTRHADISQVLKDP  
RLVAGPMTGQFERLPEDIRKQLTPLRDVNMWMMGHTTNEGHLRFQALLKRYFTPRTVENF  
RPRIQALTDITLLDAAAARGSSFDMMVKDLAIPLPSNVIAEMLGVPLADEYLLQRWSRDLGG  
IFTNFNPEQLFQSQKSVMEMMDYMREVLVSQYRRGASGENILEVFLRAQDEGLVTEEEILA  
NCVLLLLFAGHETTARLISRGLALLFDHPEQLAMLRQQPSLIPQAVEEMLRYGDVAGMTTR  
LTVPAPVELGGQTMQPYQMVYVMLAAANRDPSTLFPDPDRFDITRKPGKHVAFGYGSFYCLG  
AALARLEAQVFFETLLRRFPNVRPAKGASPVWEQQGPLNMHLVTLPVEL

>JQX13\_52240|KEGG|CYP1329A2|[Archangium violaceum]|avm|DP

MEASQPSKSIPIRVSGAPLIGNLSEFRASRLDLLLRVSRECGDIGSFRIGPVEVVVISSAT  
LANSLLVGHAEDFNGGPIGRIFMPLVGDKSLIFQDGAPHREQRKLLAPSFHPKRLAEFCQ  
SMTRYTQEAASGWQDGQMLDMVHEMTILTMRIIGKTMFDVDFQNEASDLREAMMVTLEHL  
DHMSSSAPIPLSWPTARNKRARAAIATIDNSIRAMIDERRRDATDRKDMSSLLQARND  
GQPIDESQIRAHIVTFFSAGHETTALALSWTWQLLARHPEVYARVRQEVDA LGGKTPGFE  
DLPRLSYLQQVIKESLRLHPTIFMIARAARDVEIEGYPIRKGQMVLIIPPYCIHRNPEYF  
PDPERFQPERFEPEREKSRPKQSYMPFGSGPHTCIGSHFAMMETQLIMATMLQQLDLELP  
AGEQVKPQVLTVSLRPSAYKMRVKRRGSDAPQTKVA

>MEBOL\_000247|KEGG|CYP253D|[Melittangium boletus]|mbd|DP

MNAPSASPRIPTGPRGLPLIGVIRDVRKDSLGLMRTATEHGVPVSGYRLGPGRSYLVSH  
DGLKHLVQDNVQNYTKDHVSYSLLRRVVGDLVTSQGETWLKQRRLAQPAFHRARISAMA

AQMVRAAAELSEQWTDQRSGEPRRAARDMLGLTLRIVGEALLGTDVRAQTDVSAAFNV  
ISEQTVERFRDLRVLPPIIPTAYDRAFRQANQSLREVVATLVAQRRRHLEDRGDLLSMFM  
LAQDEETGERMDDAHVQDEVLTMLLAGHETTATALTWTWALLEQNPDAERAFHAELDSVL  
GGRLPTAEDVPRLVYTRRVLDETMRLYPVYILSRKVVSDDTICGYRVLGGSMLDVSPYV  
THRLPEFWPDPERFDPDRFSPERSATRPRYAYFPFLGGPRQCIGNNFALMEGVILILATLG  
QRHRPRMVSGYTPKPEPLITLRPSEELPVVITSR

>MEBOL\_000316|KEGG|**CYP107DL5**||[Melittangium boletus]||mbd|DP

MTAKTPERNQDGTCPASALREAPTWDSAVLDRENSEFIAKAHAIYDELRAVGPPVRCPFG  
RGISERANPEASQAREPGKGTGGDRLFVTRYDEAVSVLLDERYSSDLRSVMTPEQRARLE  
ANMP EEIRPLAHSILLDDPPDHTRLRKLVPNFTARAMELLRPRIQRLVNDLLDTAERKA  
VERGEAVSERRMDLIEALAYPMPVTVISDLLGIPVEDRERVHGAETLLRAEQDAMRDE  
RIRTSMRAFGQYLDGLFERKRREPTEDMISQMLHVQEDGDTLSHQEMVSMVFILFFAGHV  
TTVNLIGNGVVALLSHPEQHARFLADPAGLAKGLVEETLRYCGPVDYISTPRIAREEMEL  
GGTHIPKGENLSLGLASANRDPARFAHPDVFDTITRPDAHRNIAFGKGIHVCIGAPLARLE  
GQLAFETLFLQRFPKLRLAVPAEEMRWGSVASLRGFNRIPVLF

>MEBOL\_000406|KEGG|**CYP117E2**||[Melittangium boletus]||mbd|DP

MQLNTPNALRERLSRPATYKDGIPILPGALPLVGHVPFNLGDTLTFLREAAHQVGPLFWM  
RNLGSETQLVCMGEPGFELLKNRVTSSEFIREQAPDFIGDALLSRDGAPHRSLRTAMSGP  
FTPRGLTSSGASALSAEVIEASLAKLPSPGFSLLAETQRLALDIIIFRIMGIDRSELDAFN  
HHYREFVLGAFPVKITVPFGPYWRSVRGRRWLDERFSRLIVAARGRTDMKGTLAALLAAR  
DEQQQELKEVDLVQNLRLVALAGHETSASVMAWLGIVLAQRPDLWRQLREEAEAAPALPQ  
SPEDLKRHPFAEAMFREVLRLYPPLSATARQATEDLTLHGKHVPKGMTMTVPVGVYGFDP  
AIFPDPERFDPSPRWMGRRLPPSAIETAPFGGGPHFCLGYHLAWMEVVQFATGFARELARR  
GLRPRIAPGSAPAKLRYLPFGQPPKKTRIELVPA

>MEBOL\_000745|KEGG|**CYP264J2**||[Melittangium boletus]||mbd|DP

MQSIPDLMPLAHRMNPYPPLYAELRRDHPVCRVEPGGLVAISRYEDVEYVLKHPEIFSSHG  
FRVAWQPEWVDNPLAQSVASDGQEHTRLRSLIGRAFTPAAINRLGERIRATASRLADD  
LLARGEADFMESFAAPLPARAISALLGIDPSLERHYKRWTEVLVSITPIPENTEHVRRT  
DTIAEMKHHVQRLIDERRAQPSDDVLGLIVRGGPDGQRLSDPEIVGLVFTLLTAGLETT  
FLFTHAVRLLAERPDLVLEQLRAHRELLPKFIEEVLRYNGPVQALPRIVTTEVELAGVRIE  
RGACVLPLIASANRDEARFPHADRFDLEREESGIPFGYGAHYCLGAFLARLEARTGFDAL  
LDRFSGFSLIPEGLVWNRGLVTSGPVKMPVRFLKN

>MEBOL\_000961|KEGG|**CYP262F1**||[Melittangium boletus]|mbd|DP

MDSSSPSHGASAPRARLPPLASGLPLVGSTPQVLANPIRFLMRARERYGDIYTLDLGVQR  
MVLNLNHPRQHEHVFLTKSKNYLKQGALWDAMRTLLGNGLAVSQGEVWKRQRRMVHPQFHR  
QRLARITSLMVAAIEDQFERWDEQTRAGQSLDAVPMFAELTMKLLAKSVFGTAVSHESVE  
TLRPEMLYVIKYMVPSMLTQSLPSWVPRPGERRYQQALERIDRLLFSVIEQRRGEPGGSD  
DLLSMLLEALDEETGLPMQARQLRDETTLTLFLAGYETTSVALAWAVHYILEDAAVWRRLR  
EEVEQVLGDREPTFGDMGELKYTRMVIQESLRICPPIWWNPRLAMEDDEIDGYAIPKGSV  
IAPLTYVVHHHPDVWKDPERFDPLRFASEEGETRHRCAWGPFPGIGPRKCVGVEFAMMEAQ  
LVLAMFVRRYDVSRMAGPPVEKAMLGTLRPKAGIPIGLHRRRS

>MEBOL\_001720|KEGG|**CYP167B10**||[Melittangium boletus]|mbd|DP

MSAEQTNPSENRPASQFNPYAPGYEANPHPMLEKLRAEAPLFYWELGRSWIVSRYEGLA  
VLRDDKRFSPNREDWEFASVMGSDAIIPEMEELNKNGLFALGEQGHARVRLVSPAFTPR  
ATERLRPEIQAIVDELDDTMAAKGRLMNVHDFSERIPARVIGSMLKIPSGHEEQFHEFTN  
AVAKSLFPSALAPEELAPLRQIREGISLVTETIEDRRRNPRENDILTTLIQTEEQGDTL  
NKHELLALVSSLIVGGFETT VHLM SFCVYSL LQQPGVFAEVKARPELIKNLVEEVLRFDN  
FVKMGPARYALEDLEMGGVRIKKGQMLII LLTSVLRDERAFDKAHVFDVQRNGNSNIAFG  
HGAHYCLGANMARLLVQIAMGTLVRRFP EMRLVNPPAFGPHSLMRKMEVLEVELGTPSA

>MEBOL\_001721|KEGG|**CYP251V1**||[Melittangium boletus]|mbd|DP

MTAPPANLQRDVSPPTTPPERPPLTVAVMEAPGGLPLLGHLP RMVRAPHEYIQSLRAHGDI  
VRIRVGTS PVYVVTSP ELIHQVLVARSDGFERGRVFDKATAAIGKGVIVTNGDFHLRQRR  
LLQPGFQRARIHGYMETIHRQVDTQAARWTPGGRISLREEMHRFTLNAVTRTLFGANTEE  
GIATEIGDYIDAANAWVSHHTLLSSEFFERLPTPVNRAFVRKKARFDELIGAFIDARRAD  
ERDHGDLLSALLAAQDAETGKGMSDEQLRIE IAGLFVAGSETTAT ALSWLFHEVGKDPQV  
EARIQAEVDSVLGGRPVTADDLPRLQYIQC VVSETLR LYP IAWLLMRRTL RDLELGGYHL  
PAGVEVLVSPIMSHRNPRIYPEPMRFPDRWLPERARELPRYALLPFGDGKHKCIGDMFA  
RTEMVIAVAAIAARWRLVPVPGHRVWEVPRSVLRPNQVLMTTVPRTPHTPQETQS

>MEBOL\_001915|KEGG|**CYP1284B2**||[Melittangium boletus]|mbd|DP

MDAFNGQKLDKIPAHVPPELVYEYDNARDPRL LQDPHARMRSLILEAPPIFFTPYNGGSW  
VVTRKKAIVDITMNPEVFSNAFISGAKDSQQSL SLLPISVDPPKHTAYRAPLNQPLSAKS  
VAGLES AIRAMTNELIDK VLAAGRCDFLS DIAEPLPVTLFMKLAGMPTDR LAEFRHLATQ

ATSSSTDHATREGVFKRIAGILAEVIKARQEKREEDLISHLLDVNINGQNPTFQEMLGYS  
ITLFLGGLETVVNALSFGVLRRLARDQELQAKLRADPSLLPGAIEELLRLHGIASVTRQVT  
RDEVCHGVQFKKGDTVSLLLPAANYDDAAFPNPEQFILGRTEQHQTFTNTGPHRCVGLNLA  
RLEMKVFYQEWLKRVPFSFRLDSQSPPRFMGGFNLAVTSPLVW

>MEBOL\_002117|KEGG|**CYP1492A3**|[Melittangium boletus]||mbd|DP

MNTALTLDAPRPLHEYAPSSLELIKIRREGYLGWMMKVVRQHGLDVRIRMGSRSFLLVT  
HPDHVRHINVTQRESYDKAESYDSLRELLLGNGIVTATGVDWRRQRKLMAFFTPRGVEK  
FYPIFLSDTQQLIHWRSQHQSGRPPVEMLDEMMQVTAABILHSVFSTDTGETLQRIKHS  
IETMISHISNMQMRPVQVPLWVPTPGNLRFHRAQKLVTAIHELIAARRAIPTQWPDDL  
LTKLMTTRDEETGTVMAEQLLDVNGITLFAAGHETTARTLSFLWYALSQNPEVERRLHAE  
LDSVLGDAPPTINDLKKLPYTLQVVKEVLRLYPAAPMYARDAVADDDLDGVRIPAGTRTI  
VFAYATHRHAPAFWDEPERFDPDRWLPEREAERHAHAYHPFAIGPRICLGNNFSLLETHVM  
AAMLARHFKLRMKPGHVPQFDLLGTLGSRNGLPMLIEARTGTCTL

>MEBOL\_002190|KEGG|**CYP107DP7**|[Melittangium boletus]||mbd|DP

MSTTLSPQEIWAPHTRFNPLPLYARMRPEGPLFRQMDANRGVPIWLSTRYKASVELLRDP  
RFTKDERLVAPQARQARVAEMEAINRNMLMSDPPDHTRLRLTVSKAFLPRRVEELRSRVE  
AIAHRLLDALPAQGSVDLIDAFAFRIPVTVIAELLGVPPEDQDQFRVWTTAITQLPSADR  
LESIKQASLAFMAYVQNLMEKRRAEPREDLVSDLLQAEQGDRLSSEELIGMVVLLLNAG  
HETTVNLIGNGVWALLRHPEQLERLRQNPALIDSAVEEMLRYRGPLECATHRWAREDIEF  
HGQVIPAGETVLVSLLAANDPEQFPEPERFDITREPNRHIAFGFGIHFVCGAPLARLEA  
SIALPLLLERLPRRLAVDESQQLQWRQGLVLHGLKQLPVAF

>MEBOL\_002509|KEGG|**CYP102M15**|[Melittangium boletus]||mbd|DP

MGKMLAERLNLVTGQLGMERVSIPQPRVRPVVGNAPDLGSETPMQNMMKLARELGPLFRL  
SFPGGRSLLVSSHELVDLDCDESFRDKKVGAALIEIRDFA GDGLFTAYTHEPNWGKAHR  
LLMPAFGPAAMRGYHDEMLDVADQMLTRWERFGPEEAIDVPDNMTRLTLDTIALCGFGYR  
FNSFYQREMHPFVESMVRALAEAGNRARRVPLKTQLMLRTRRQFQVDASYMHEVTRELIA  
QRRKLAPEDAPRDLLGLMLSEKDPLTGEGLDDNIRNQLVTFLIAGHETTSGLLSFALYF  
LLRHPDVLQKAYAEVDRVLGSETPRFEQVNQLHYIDQILRETLRLWPTAPGFSVQALVDT  
RLVGTHPLSAGDTLFLVLT PMLHRDPTVWRDPERFDPDRFAPEVRDGI PQHAWKPFNGGQR  
SCIGRAFALQEATLVLGMLLQRFHISEPAPYSLHVRETLTLKPEGLRIRARVRQNVSRSL  
TTRPSPAPVAATSQGGGVAAGTPLLLLYGSNSGASEAFARRIASDGLARGYSAKVAPL  
DEYTGKLPKQGAVVLVTASYNGQPPDNARGFHAWI SHVPEGSLLGVRVAVFGCGNRDWAA  
TYQAI PKHFDERLHAAGA QALVARGEADARGDFFGDFEHWYAPFWSTVGEALGVSTGEVN

SGPLYKVEVVPASVDLVAQNKLGMSTLVENRELVDMTSPLGRSKRHLLTFRLEPGVTYAA  
GDYLAVLPENHPDLVERAARRFGVRTDAAVVLRSTRGAMAASLPTDRPVSQVQELLGRHVE  
LSAPATRKDLERLAAMNPCPPHAQHLLALAQDAERYKAEVLDKRVSVLDFLEKYSSCVLS  
FADFLELLPTMRVRQYSVSSSPRADPTQCSLTVAVVDADAWSGQGRFHGTCSSYLARLHP  
GDPVAVAVRTPNAPFHPASNATPLVMIGAGTGLAPFRGFIQERALRHVHGEAAGPALFF  
FGCDHPDVDFLYREELAAWEREGVVKVLPAFFRQPEGDMFVQHRLWKEREQVKALLAQG  
ATVFLCGDGRRMAPAVRETLARIHQETVGCSEEEASRWLAEMEKQGRVLADVFA

>MEBOL\_003675|KEGG|**CYP109R9**|[Melittangium boletus]|mbd|DP

MSLVDRFSFFDPEVMQDPYPYYAELRERAPLLWNAPLQAYIVTRHEDVAHVLKNPALFSS  
ASLRLAGQPIDVVGITILGRPSVPALVNTDPPLHTRMRSIVSRTFTPKRISALEPRVRELS  
QKLVAEMTAQEEFDFMEGLATPLPVIIIAEMLGIEPARRRDFKRWSDTLISLASAAGPGP  
EFRRDGQEMHAYMTRIAEERRLAPQEDLISLLVQGGEGQTLSAEEVNAFALLLMLAGNET  
TTNLLGNAMHALLSHPEQFDWLRKNPSGCGAAIEEALRYESPVVSVMRRTLREVELSGGK  
VPADSMMLVLSSANRDPKFPDPDRFDIQDAQGVMSFGHGIHFCLGAPLARLEAPTAL  
GELIARAPRLRFAPRQPLRPEYPPSFGVRALKTLWLRE

>MEBOL\_003803|KEGG|**CYP110R3**|[Melittangium boletus]|mbd|DP

MTHPLPPGPRFTPVQALRFLRDPTRFCLESKARYGDPFTAPLPVGDVVLTGQPDGIREIF  
SADPAVFEPLGNLPLAPIVGELSMLLSGPRHKRERKLLMPFFHGERMRAYGQTLRALTL  
HAAESLRPGEGLRAQHLLTQHISLEAIIQIVFGVQEPERVRRYREVMVPAMDSTPLLMMA  
VPLRRSFGGLGPWARFQHHLAQVDALLTEELANRRGHEAGHTDILSLLLAARDEDGQAMT  
NEELRDELRTLLLAGHETTAIGMAWALHYVHRLPEVQARLRDELAPLGPSPEPEALTRLL  
YLGAVCDEALRLHPVVPVVGRRTLAPFTLLGRELPVGTGVMAAICLAHASPELYPEPERF  
RPERFLERRYSPFEYLPFGGGARRCIGAAFAQYEMRVVLGTLLAAHRFSSPPHAAPERPA  
RRNITLGPRHGVALVYEGPARA

>MEBOL\_003931|KEGG|**CYP253G4**|[Melittangium boletus]|mbd|DP

MTTSTLPLAPMPPGHWLLGHLRERETNPLGLFLRGREQLGDVVRFRMGPPQYVEQLAHPDH  
VKHVLADASARYTKGSIFAKTRPLVGNGLLTAEGEFWKRQRRLSQPAFHKDRLATLAGVI  
TQTATEAIAGWEAPVAAGTPVPVFTEMMRLTLNVVVRALFGLDVAGQTQLIGDAFTQALE  
VTNRRIISPLPYVPWFYRLPTRDNRLFQRAMDTLHHTVEGLIAQRRAQARDGQSPPGEDL  
LGMLMTACDADTGDAFDDLQLRDEVMTLMLAGHETTATSLAWTFHLLQNPQEALMHEE  
VDQVLGGRTPTLEDLPKLRGTGCVFEEAMRLYPPIWALPRTPHEDDEVGGFRIPKGDIVL  
LVPYVTHRHPFEPDPERFDPTRFLPEASRQRPRWAYLPFGGGQRQCIGNNFAMMEAQFI  
LAMVAQRFRRLRGVPGVPVEPEPLVTLRPKGPLPMHVHRRQGKSRTHLASSA



>MEBOL\_003979|KEGG|**CYP253S1**|[Melittangium boletus]|mbd|DP

MTHDAARRIPPGPKGHWLLGNLPERRSDPLSLFLRGRERYGDVVRYPMGPFLLMHQLSHPD  
DVKRVLVDNAQNYRK TALMQRLRPVLGEGLLLSEGDFWKRQRRLAQPAFHKERLAGMATV  
ITGLIEDALPRWDALAERGEFPDLSAELMRLVLAMTGRVLF GADLSDSARDVARAVTTVL  
EELNHQVLSVLPLPASLPLPGHRRRLRAIQVLD SIVFGIIDARHRGAHASEDLLAMLMQA  
RDADTGEGMSDRQLRDEVMTLVLAGHETTANALTWTFHLL EQHPEAEARLAEVTRLLGE  
RTPTLQDL PRLGYTARV FDESMRLYPPAWLISRVALNDDILGGYPVARGTIVVILPYVIH  
RHPAFWEHPERFDPDRFLPARSGARPRFAWL PFGGGQRM CVGSGLALLQGHVLAMLARR  
YHFQRVPGHPVEPQALVTLRPRHGLRVTARRRSAPR

>MEBOL\_004399|KEGG|**CYP109AK1**|[Melittangium boletus]|mbd|DP

MQSSDYNPLSSTVQADPYPHYATLRENTPVYFNEQFGWYIVSRYEDVVAITKNPAVFSSA  
RAIVGPEKLDEAAKVAPHALRTFRRGVLISEDPPHTTKTRGLVTKAFTPKRISEMEPRIR  
QLARELISQLPRSGEFDLIKDLAEPLPVIVIAEMLGV EPPERHDFKRWSDDALATS FALA  
KGSELSGIERSNRELS DYMAQALEARRQQPREDLVQALLDNGVREGVLSVSDAVDFCRLL  
LVAGNETTTNLLGN GVRALLSHPDQRDLIREPALIPNAVEEMLRYDSAAQALFRKTTQE  
VEVAGTRIPAGASVLLLFGSANRDP RKFQEPDRFDVTRNVVGQVAFGHGIHFCLGAPLAR  
LEAKVVLEELLTPDRRLSLVPGQPWEVLEHFSIRGLKSLRVRVEPAAGARASA

>MEBOL\_004662|KEGG|**CYP107DL4**|[Melittangium boletus]|mbd|DP

MAMNPMDEKRTEESGTSPVGVC PMKASREVPHAGSVRLDREDPAFLAVAHEAYERMRKQG  
PVVRASFGRGFSDDL LPDGDKPRTAKGEPGSERYFVTRYDEAVEALLDDR LSSDFRSTMT  
PEQRAQLPFMP EELKPIAYSLLMLDPPDHTRLRKL VQPNFTARAMETLRPRIQRIIDRLL  
DQAESEAAARGESAPERRMDLLPAFAYPMPIA VISDMLGIPEEDRAQVHTWAENLLSAEG  
PSIGDEQRRGVLREFIRYLEGLFERKRRAPGEDMISQMAHFQEDGDKLSPQEMMSMVFIL  
FFAGHVTTVN LIGSGVVAL LTHPEQLERLLADPSLVKGAVEETLRYWGPVDYMGTPRIVL  
KDMELAGCPIAQGEKLT VGLASANRDPERFPNP DVF DITRPEAHRNIAFGKGIHVCIGAP  
LARMEAQLAFETLFR RYPKMRLAVPAGELRLAATSLRGFDRVPIFF

>MEBOL\_004948|KEGG|**CYP1506A5**|[Melittangium boletus]|mbd|DP

MPNVLSRGVFNLFFGSKRQAFASLPGPQPGILGTAGDFLGAQPWDVCARYGREYGGVTLI  
WMGPNPGLVLNDPVLIEQLLDSRTEFEKGSRLRQELTPTTTDQSLFIAPQSGDWA EKRI  
DPFVQWPSPDWLAAQVAPMQAAISDFVDGLIASGKTVDLAPVLRRLTCDAFAVA AIGKL  
PDSVYEDFMLLAKGADARIQAKLPLKFVSLPKGFEEARERFYRFFDERVSAARRNPKPEA

NDLMSRTMREVPDFGDKALAVNIALIFYGGAFSSSTALAGAFHQLQKHPDAEARLASEAA  
AFAGGPPTLERLNEARWAEAVVLESMRVLPPVRVFTRSPVTDVSFAGVTMPAGATIMVSN  
QYLHRDPQHWPNDPTFEPARWLDGGTARDPIGSGHYFFPGRGPRMCVATDFAMVFLRTAM  
VTIAARAKAEISSTEPFEEGFFFGVVLPTNVHTKFITRPR

>MEBOL\_005233|KEGG|**CYP264D7**||[Melittangium boletus]||mbd|DP

MDSPRFTRRAPMSERINLLAPEVRANPYPLYARLRQHAPVSQVDPGGIWAVSRYEDVMYV  
LKHPQLFSSEGFRQAYRPAWISNYPLADSALVMDPPRHTRLRGLINRAFGTSVLTRIEPR  
VREIAATIAANLPEGQEVDFVEAFSVPMMPMGVLGELLGLAPEVHPLLVRWAQHLAQFTSI  
GPADTARQEAMRATVNEARGHFERVLAERRRHPGDDLMSDLVQARMDGESLSDTELLGFM  
FLLLIGGLETTLHLSHVALRLHLQPELMTLLREQPALVPRFIEEALRHEPPAQGVMRLT  
SEETELGGVRLPRGVRMLLLMGSATRDEAYCADPDRFDPHRTAPQNLPGHGIHFCLGSQ  
LARLEARLSLEALLARFTRL SAGTQPIQWNSSLIVRGPTRLPLVAHVD

>MEBOL\_005971|KEGG|**CYP242C1**||[Melittangium boletus]||mbd|DP

MSAAPAVSTSNYDLFAPSVLEDPTELLTRLRAENPVYYSPQLQGYVLTRYDDIVMLKDP  
DMGSAMLTGWIDQMPQEAQEQLQPLRASLDLWMGHKNNDHQRIRQVLRRLRYLTSATIESL  
RPRVESLVKSLFDAVEGKTEVDIIQEIANPLPCNIIIGELLGVPQEDRDQLQQWSQQALNL  
FRIADLPTLLETQKAILAIQDYMKPIVEARRHAPLDDLPSVLATAQAEGQMKSDAEILGN  
CVALMFGGHETTIVYLIANALLALMQNPEQFQMIKDRPELIPAAVEETLRYDGPVDLITRV  
TPKPLELVGGHVPANSMMILMLRAGSRDPALYPNDRFDITRPTTVRSLAFGLGSFYCLG  
TALARMETQICLREIIHRMPNIRPLFDVNKPDYRPLPPIRRRLETLRVAL

>MEBOL\_006681|KEGG|**CYP107DP8**||[Melittangium boletus]||mbd|DP

MTTSPLFAEGETLWSPHVRANPFPLYKRMREEFPVARITDPQLGMHFWLLTRYDDVVSVMV  
RDPRFTQDPTRLPETVRQRFFGHKLRSLSRHLLTVDPDPDHTRMRSLSKVFTPRRIEELR  
PRITAICSELLENLKAQSGADFLKVLAFFLPVIVIAELLGIPSEDRDQFREWTQTFAP  
PSKDSQEKAREAYQLFFKYLEELFERRRQQPQDDLISALIAVQEQGDRLSAEELMSMVFL  
LLVGGYETTAHLLGNGLLELLRHPEQLQRLREDRALIPSAVEEMVRYCGTFELSILRFK  
EDLELHGQHIPAHEAVRVNYLAADRDPGAFSEPDRFDVGRTPNKHVGFGHASTSVWERPS  
PGWRPSSPSSCCWSDSRSCVWPRNPRSSCGARVPKRVGW

>MEBOL\_007050|KEGG|**CYP1347B4**||[Melittangium boletus]||mbd|DP

MSSVMPLMEEDRNLLSPENLANPLPLYEELRENEPVHWSPRVNAWFLTRHEDVLACFRDP

RMSADRLKFFEHQIQGLDPDTIREFMETSRNQMVMRVGAEHIRLRQTGAGFTPPRLDAM  
CPSIHRTMKQLLDRVYEQGRMNLAQDISYPLPTRVIADLLGVPAEDRERFQRWADMLADF  
AAPAAGACMLDAARRANQAMVEMKDYFLPLIEQRREHPTPDTLSLMVQAQEQGQMTPEGEL  
VANAILLLFAGHTTTTDDQLSNCVHDLLAHPEQLQLLRRRPELLRTAVDESLRFHPAVPFV  
FRVAVEDVALRGRLIRRGDVVFLGMAAANRDPRAFRDPDRFDITRDNSHPRHLSFGFGAH  
HCMGAGLARREMETGVSMLLERMPRLRLDESRPTRLKCHSLNFRGFEVLPVRW

>MEBOL\_007148|KEGG|**CYP120G3**|[Melittangium boletus]|mbd|DP

MTSPADASPPSPPETLPLPPGSSGLPLIGETLEYLRSSRAFAERRQRQYGAVFRSHVLGS  
PAAFLLGPEAVQWIFAGEGKYLKNRWSPGVRRLLAGHCLAMLEGNEHLERRRLLAPHFSY  
ASMRGFVPIIESLSRRHFERWTARPGDFTLWPAMRELAFEIALALIFGQDTVLDLPFLMH  
FKAWTAGLFSPPFIDLPWTTTFGRALASKKAMIGYLEQVVAERQARTEQPPDLLGSLLQRR  
EGEEPLSRAAIVDELQLLLFAGHDTTVTAMSNLMLMLAQHPDVLQRGREAVAGLEGPLTL  
EGMRATPYLVQLLHEGMRTIPPIGGAFRVTTTRDVAFNGYRIPKGWTVPVSIKMAHAGANW  
PTPDRFDPERFGGENPEQKKPGTFIPFGGGPRICLGQHFAMVEMSVMLILLKKHHAWELV  
PGQDLEYTQVPFPKPRSGIQLEFRRIDAGERPLAEP

>MEBOL\_007173|KEGG|**CYP107DP5**|[Melittangium boletus]|mbd|DP

MMRRMNSSPASFQELWAPTTRANPLPLYARMRQEAPVVRVVDPYFKLPVWVVSRYKDAVE  
LLRDSRFTKDQSKLPEDSLPRQMRNDTMAALNRHMLMADPPDHTRLRLTLVSKAFTPRRVE  
ALRPRVTAITERLLDGVKKQGSVDLLSAFAFPLPVTVIAEMLGVPAEDQARFHEWTTLIV  
NPPLDGDGPLRAAGMQFLLYFRDLMEKRRSDPRDDLTLALVSAEEQGDRLTTEELVGML  
FLLLVAGHETTNNLIGNGVWALLRHPEQLERLRKNPALIESAVEEMLRYRGPVETTTQRW  
APQDLEFHGQVIPQGETIIASLLAADHDPEQFPEPERFDITREPNRHIAFGFGIHFCLGA  
PLARLEASIAIPLLLERLPQLRLAVDEDALQWREGILVHGMKQLPVAF

>MEBOL\_007319|KEGG|**CYP197AA1**|[Melittangium boletus]|mbd|DP

MSTARAALPPGPRSLPVLGTLIDYAKDPLGFIEACVRDHGDVVYVELLGQRTYVLQRPEH  
IEHVLVTRHRHYIKDAFQRELMGGRLLGNLLTNEGEPWLRQRRMQPAFHRQRLAAYGR  
VMAEHARRQLATWRDGEVRDVNADMMRLTLGIVIKSLFDLELDGKAEAVGPSLARVMEHF  
AGVQALIFPDWLPTPENLGYRAALGQLDALVSSLIRRRREAGGGETEDLLSTLLHVQDDE  
GQHMSDPQIRDEVMTLMLAGHETTSINLAFCFHLLARHPEAEASLHRELD SVLGGREPTL  
EDLPALPFTDSVVKEALRLYPATWTLGREALEDEIGGWSIAKGSVMMMNPTVHRDARL  
YEDPLAFRPQRWVDGLEKRLPRFAWFPFGGGPRLCIGMGFALMEARLVLATLAQRFRFRER  
APEDDVELLPSITLRPKHGKVRVTR

>MEBOL\_007543|KEGG|**CYP167B6**||[Melittangium boletus]||mbd|DP

MSPDSTQSHPPTVSFSPDAPGFAANPFPVLEELRKAAPLSYWKEGRAWLVTRYEEALAML  
RDSKRFSTNRAHWEFASVSGIAAIIPELAELNNAGLFALSGADHARLRKLVSPALTPRAI  
ERLRPEVQAIVDEILDEVSGQDTVNVVSDIADRIPPRVIGSMLKIPKGRETFLNRFTEAA  
VKSFLPGLLRPEDVPALRADVQEGIALVRETIERRRNPLPDDILTTLIQTEEQGDRNST  
AELLSLVSSLIVGGFETTIHLIGFTTYNLLKRPELLAQVLVEPDLIKGVIEEVLRFDNFG  
KMGLARYALEDVEVGGVTIKKGQMILLMLNSALRDEAAFSQADVFDARRNTNSSIAFGYG  
VHFCLGANLARLELQVVMNRILERFPTMSLVKEPSFGPHPVIRKMESLEVQLRSR

>MEBOL\_007929|KEGG|**CYP1284B4**||[Melittangium boletus]||mbd|DP

MHAFSGQKLDKIPAHVPPELVYEDNARDPRMLEDPHGRMRSLILEAPPIFFTPYNGGHW  
FVTRKQAIVDITMNPEVYSNKISGEHSGEHKDSQPGLNLLPISEDPPRHTAYRTPLNQPL  
SAKSLAGLESAIRVMANELIDKVLAAAGRCDFLS DIAEPLPVTFLFKLAGMPTNRLAEFRH  
LAVQAASATVDPATRAETFKQIAGIMAESIQSRQEKREEDLLSRLLDAKIDGRNPTFQEM  
LGYSMLLFLGGLDVTVNNAMSFQVRHLARDQELQAKLRADPSLLPGAIEELLRLYGIASVP  
RRVTRDQTVCHGVQFKQGD TMLLLLPAANYDDAAFPNPEQFMLGRTEQHMSFN SGPHRCVG  
LNLARLELKVFIYQEWLKRVPFRLDPQAPPRFMGGFTLAVTSLPLVWE

>MEBOL\_007972|KEGG|**CYP109R3**||[Melittangium boletus]||mbd|DP

MDLLSRFDFFSPDVMRNPYPYFAELRDKAPLHYDAKLKAHVLSRYEDVAFVLKNHALFSS  
TKIRIAGKLQEERASVKELGVSNNLVSM DPPVHTRLRGLVSR SFTPKQINAMEPRVRELS  
RELVAEMTSRSEFDFMDALASPLPVTIIAEMLGIDPVRRRDFKRWSDNLIQSNNATLQSG  
ETPEEVIRSAKEMLAYMTEVAEARRREPRGDLISLLVQEIDGVAALTPPEVNSFTTLLLI  
AGNETTTNLLGNALTALIRNPGEYEA FRRDPSPAACSAICEETLRYDSPVIGLFRRTTQE  
VEMSGGKLPADTSVMVLLASANHDPRKFPEPERFDPTRDTHGLMSFGHGIHFCLGAPLSR  
LEAPVALRELMERAPRLGFSRQPQDIDYGGSFFLRGPKSLWLQKN

>CYFUS\_000165|KEGG|**CYP110R3**||[Cystobacter fuscus]||cfus|DP

MTTPQLPSGPRITPVQTFRFLRDTTRFFLDCRARYGDPFTAPLPVGNVVVTGDPEGIRDI  
FSADPALFEPLGQLPLAPAVGDN SLLLMAGQRHKRERKLLMPPFHGERMRAYGQLMREIT  
LRSVETLRPGGPFRAQELTQSISLEVIIRAVFGIEEPARMRRYREVLVGYMESYTPLMM  
AVPLRRSFGGVGPWARFQRYVTELDQLLTEELSTRRGHEVGHTDILSLLLAARDEEGQPM  
TDAELKDELRTLLIAGHETTAIGMAWALHHLHRAPGTMQRLLLEELAPLGPEPEPEALVKL  
PYLTAVCDEALRIHPIVPVVGRRTVAPFTLRGRELPPGTGVMAAICLAHVDPVLYPEPDS  
FRPERFLERKYS PF EYLPFGGGARRCIGAAFAQYEMRTVLGSLLAAHRFSLANDTPERPV

RRNITIGPARGVEMVYEGPRRGALA

>CYFUS\_000318|KEGG|**CYP264D9**||[Cystobacter fuscus]|cfus|DP

MSGRINLLAPEVRANPYAVYAE LRRHAPVCQVDPGGYWVITRHDDVVA AFKNPQLFSSTG  
VRMATKPEWLGHNP FADSMIGQDPPRHTRLRN LVNRAFGPPALARLEGRVRHYAE AIVAR  
IPEGREVD FVDAFTLPLPASVIGELIGLEPSLHSHCKRWADDLTSISANPQDEKRREEIR  
AAVRETEAEMARVLALRRSEPREDLVSELLQARVDGQSLSDAELMSFMFLLLVAGLETTI  
HLLGHCVRVLMERPDLARLRADRSLLPRFIEEV LRYEPPVQAFGRLT TAEAE LSGVRIP  
AGAKVMLLIGSANHDDARFPDGRFDM DREGVNNLPFGHGIHFCLGAPLARLEARIGLEV  
LLSRFERFTPAGPLEWNHSFTVRGPRVLPVIAHGSA

>CYFUS\_000663|KEGG|**CYP167E3**||[Cystobacter fuscus]|cfus|DP

MLQKTPTPDHGPDFVLDMEDPAFVHN PYPTYAWLREKAPAYRWKARGDAIVFSRHKDVRA  
LVLDRRFSNDYRMWEFARKEEWPAEHA EYKSIMDNGLFGLADADHLRV RKLVS PAFTPRA  
AERMRDEIQKAVDDIIAEQVKGERVDLT TITEPLPMRVVSDMLKIPEDLRGEFRAFGLAS  
IRSSVLFTKSEELFALIAMPRWIRMLREVI AERRANLLENDLLSTLITASDEGQKLTEE  
EMISLVHALIVAGSDTTVHAANWALYSLLRHPDQFALLRDEPSLIRNTIEETLRYDLFGK  
GGLPKFAREEMEFAGTKLRKGQMVMPFI PAALHDPEVFPEPERFDIRRDVSQTIAFSAGQ  
HFCLGAALARQELDLVVGTLVRRFPHMRLS QEPEFVPH PIMRALTRLEV TLS

>CYFUS\_000749|KEGG|**CYP253G4**||[Cystobacter fuscus]|cfus|DP

MNNSAPLPPMPPGHWLWGHLPERESDPLGLYL RGRALLGDVVRF RMGPIYVEQLTHPDHV  
KYVLADAPARYTKGPI FHKTRPLVG NGLVTAEGDFWKRQRRLAQPSFHRERLAGLAGVMT  
ETAAEVLAQWEPRVRAGEPV PVFPEMMRLTLLVVVRALFGVDVAEHTRELGESFTTAEV  
TNERIISPLPYKPWLYRIPTAKNLAFQ RAMVPLNRIVEGIIAQRRARGPADESQDLLGML  
MAARDADTGDTFDDVQLRDEVM TLLLAGHETTATSLAWAFH LLEKNPEQEALLHEEVDRV  
LDGRIPTLEDVPKLRYTSCVFEEALRLYPPIWAI PRVAEEEDV VSGYRIPKGDLVLLVPY  
VTHRHPDFWPDPERFEPT RFLPENSKQRPRWAYLPFGGGQRQCIGNNFAMMEAQFILAMV  
AQRFRLRGTGAPVTAEAHVTLRPHGTM PMHATRREKQPQLQSA

>CYFUS\_001301|KEGG|**CYP253D3**||[Cystobacter fuscus]|cfus|DP

MTDTS AAPRAPAPRIPTGPRGLPLIGVVREARKDILGWFLRTAAEHGPVAQYRFGLGRSY  
LVSHPDGIKHVLQDNVKNYTKD HFSYAMVRRVVG DGLLTSQGDTWMKQRRLAQPAFHRAR  
ISAMADQMVRATVELSEQWAE AQRTGEPRLGAVDMMSLT LRIVGEALLGADV RADTEAVG  
RAFTVISEQTVERFRSLRFIPVLP TAYDRAFRDANRSLRQVVTRVIAERRAHTEDRGDL

LSMFMLARDEETGERMDDTHLQDEVLTMLLAGHETTANALSWTWALLAQNPDAERTLHAE  
LDAVLGGRPPTVEDIPRLVYTRVLDETLLRLYPPAYALSRKVVEDDVICGYQVRSGSSVD  
MSAYMTHRLPEFWPDPERFDPDRFTPEKVAARPRYAYFPFLGGPRQCIGNNFALMEGTLI  
LATLAQHHRPRLVEGYTPRPEPVITLRPSGHLPVKITPR

>CYFUS\_001363|KEGG|**CYP264A6**||[Cystobacter fuscus]|cfus|DP

MTTQRVNIIAPEFRADPHPRYAELRRNAPVTQVEPAGFWAISRYEDVAFVIKNPQLFSSQ  
GFKAAWQPEWVGYNPLANSMLVLDGVGHARMRTLVSRAFNASAI SRLEVRI RQLANRLVD  
ELA EKGEADAVSSFAMPLPAFVIGELLGLDVSLHHRFKDWSDDITSVTPVPHNPEHAQRT  
LTAITDATRYISEII EARRRSPADDLVSDLIHAEVEGQSLTDREIVDFLVLLLIAGLETT  
VHLLAHSLLFLAERPEEQARLRAQPALVPGFVEEMLRYEAPVQALLRVATSDVTL SGVKI  
PQGDVVLALLASANRDERHYTEPDRFDVHRGQPGLSFGYGIHYCIGAQLARMEARCGLEA  
LLSRFSGFTRTSTELSWGQAITVRGPQHLP LRFIPA

>CYFUS\_001619|KEGG|**CYP107DL6**||[Cystobacter fuscus]|cfus|DP

MATNPVNEQTTKAAASGPTPQATCPMKALREAPRCPALLDKESPEFLAHAYATYADLRTQ  
APVVRTSFAHNFADAVLPGGTKRPESGSHPAKERL FVTRYDEVVEALLDERLSSDFRTSL  
TPEQRANLQYMPPEVRPIAYSLLMLDPPDHTRLRKL VQPNFTARTMEMLRPRIQRIADTL  
LDQVERAAAERGEREGERRMDLLHAFAYPMPITVISDMLGIPEEDRSRVHGWAE SLLGAD  
RRDAAMDELRRSSLREFARYLDGLFERKRREPAEDMISQMVHAQDEGDKLNHQEMVSMVF  
ILFFAGHVTTVNLI GSGVVAL LTHPEQLERFLADPTNLSKGAVEETLRYWGPVDY MSTPR  
IIKEEMELAGTHLPQGEKLSVGLASANRDPQHFPNPDVFDITRPNHRNLAFGKGIHICL  
GAPLARLEGQIAFETLFRRYPRMRLEV PFESLRWNTGSGLRGFD RVPVRF

>CYFUS\_001993|KEGG|**CYP1492A2**||[Cystobacter fuscus]|cfus|DP

MNPAL AIDTPRLKEYAPSTLELLKAIRREGFLGWM TNTWRQHGDLLRIRMG SQSLVLVT  
HPDHVRHVNVTRRESYDKGESYDVLRELLLGNGIVTATGEDWRWQRRLMAPFFT PRGVEK  
FYPIFLSDTQQ LIERWRSQLQGSGRPVEMLD EMMRV TASVILHSVFSTESDEALLRIKNS  
IETMVSHISETGMRPVQVPQWVPTPGNLRFRRAHKLVTAYIRELIARRRAIPT EQWPDDL  
LTKMMTIRDEETGRLMAEQLLIDNGLTMFAAGHETTARTLSFLWYALSQNPEVERR LHVE  
LDSVLGDAPPTLNDLKKLPYTLQVVKEVLR LYP AAPMYARDAVADDEL DGVRIPAGTRMI  
VFSYGTHRHPAFWDEPERFDPDRWLPEREAAARHAHAYHPFAAGPRICLGNNFS LLETHVM  
AAMLARRFKLRLKPGHVPRIDMFGTLGSSNGLPMLIEAR

>CYFUS\_001994|KEGG|**CYP1284B4**||[Cystobacter fuscus]|cfus|DP

MNAFNGQKLDKIPAHVPELVY EYDIAGDPRVLEDPHARMRSLILEAPPIFFSPFN GGGHW  
FVTRKKAIVDITMNPEVYSSKNPGEHGKEATGGLSLLPISVDPPQHTLYRTPLNQPLSAK  
SVAGLETAIRAMTNELIDKVLAAAGRCDFLPDIAEPLPVTFLKLAGMPTNRLAEFRELAL  
QAASATVEPATRAETFKRIAGILAE TIEARQE KREDDLISRLLDANLDGRNPTFQEMMGY  
SILLFLGGLD TVVNALCFGVRHLARDQELQAKLRADPSLLPGAIEELLRLYGIASIPRHV  
TRDTVCHGVQFKQGDALLLLPAANYDDTAFPNPEQFILGRTEQHMTFNTGPHRCVGLNL  
ARLEMKVFYQEWLKRVPFPRLDPQAPPRFSGGFALALTS LPLSWA

>CYFUS\_002491|KEGG|**CYP264D7**||[Cystobacter fuscus]|cfus|DP

MSGRINLLAPEIRANPYPAYAELRRNAPVSQVDPGGLWAVSRQEDVMHVFKNPQLFSSQG  
FRQAYRPPWISNYPLADSALVMDPPRHTQLRALINRAFGTQVVTRIEPRVREFAQ RIVQA  
LPDGQEVNFVEHFSVLMPMYVIGELLGLSPEVQPRLLSWVEWLGQFTGVGPADTARQEAV  
RATVNEARGHFEQVLTERRRNP GDDLISDLLRARVEGESLSDTDLLGFMFLLLVGGMETT  
IHLLSHSALRLQLQPELMRQLREQPSLLPRFIDEVLRHETPAHGVMRLTSEETELGGVRL  
PKGTRLLMLMGSANRDEAQHPDPDRFDMNRTQSNLPFGHGIHFCIGSQLARLEARLSLEA  
LLSRFTHLTAGTQSIQWNSSLVVRGPTRL SLIPHEN

>CYFUS\_002676|KEGG|**CYP105EK1**||[Cystobacter fuscus]|cfus|DP

MTDSYPLPKDWQHPLDPPPEYKRLRKEAPVCPVRTWDGNTPWLI TRYEDVLAALGDPRLS  
LDSSLPGFPHTSPASAA RQSRPLPFPFLPEAEYRAQRAMLVPEFAPRRMEALRPRIQQT V  
DEVLDAMLAGPRPADLISAFALPVSMRVICDLLGVSREDADRLHVISRTIGSRASSREVA  
EKALDELDTYFRRLVEENLREPTDTLVGRVVAEHVQPGRLSV DATAMFHALFYAGHGPS  
GYMVGMGVLALLLHPDQLDRFRALETPDALSAAVQELLRYVTVSHMGRQRAATEDVTIGG  
QLIRAGEGVLAQPD SANRDET VFPEPDRLDVHREPYRNFAFGHGIHLCTGRTLAIIELEV  
TFHTLFRRIPNLRLAAPLEQIRFKKDENLIGAHEL PVTW

>CYFUS\_003078|KEGG|**CYP120G3**||[Cystobacter fuscus]|cfus|DP

MTAQADPHAPSPENLPLPPGRTGLPLLGETLDFLRSSRAFTEQRRNQYGPVFRSHVLGSP  
AAFLTGPDAIQWIFAGEGKYLKNRWTPGVRLLGANSLSLLEGEEHLERRRLLAPHFSYA  
TMRGFVPAIESLATRHFERWAALPGDFTLWPAMRELA FEIALSLIFGQDTVDPFLMRHF  
QAWTAGLFVPLAVNLPWTKFGRALA AKKAMITYLDQLVAERQKRTEQPPDLLGSLLRHRD  
GEEPLPRETIVEELQ LLLFAGHDTTVTATS NLMLLLAQHPDVLQKGREAVADMEGPLTLD  
GLRAMPYL VQLIHEGMRLIPPIGGAFRVTT RDVAFKGFRI PKGWMVPVSIRTAHAGDHP  
LPERFDPERFGSENNEQRKPGTFIPFGGGPRICLGQH FAMVEMSVMLALLLKH YTWELVP

GQDLSYLLVPFPQPRSGIQRLRRRS

>CYFUS\_003193|KEGG|**CYP251V1**||[Cystobacter fuscus]|cfus|DP

MDTVTPLPTATAPEVPGGLPLLGHALRLLRLPIAYLQSLREFGDIVQLRIGSSPVYVVT  
PEFIHQVLVTHADSFERGRVFDKATAAIGKGLIVSNGTFHRQQRKLLQPGFHRPRIHGYM  
EIIHRQAEAQIAGWSPGARISLREEMHRLTLNAVTRTLFGANTEERIAAEIGDYIDAANS  
WVGLHTVLPGRFFERLPMFVNRAFERKKARFDEIINTFIESRRADGRDQGDLLSALLASQ  
DDETGKMSDEQLRMEIAGLFVAGSETTATALTWLFHEVGRHPEVEARIAEVDVAVLGGR  
PVTTEDLPRLQYIQSVISETLRRYPPIAWLLMRRATRDVELAGTLLPAGAEVIVSPMMVHR  
NPQLYPEPLRFPDRWLPERARELPRHAFLPFGDGKHKCIGDYFARTEMVIAVATIAARW  
RLVPVPGHRVWEVPRSVLRPNQVLMTAVPRSAAPVPEENH

> CYFUS\_003263|KEGG|**CYP117E2**||[Cystobacter fuscus]|cfus|DP

MQMQTLSNMLERLPMKETHRLGIPILPGGLPLVGHAPFNLGDTLTFLRAAEAKVGPIFWM  
RSFGSEMQLVCMGEPGFELLKNRVTSSEFIREQAPEFIGDALLSQDGAHRNLRTPMMSGP  
FTPRGLSSSGAATLSAEVIEASVASLPASRPFSLITETQKFALDIIFRVMGIDRSEIQEF  
NTNYREFTLGAFPLKLDLPYSPWRARRGRAWLDARFSSLIAAARGRPMPGTLSAMLLAA  
RDTEGQPLKEDDLISNLRLLALAGHETTASTMAWLGLVLAQRPDLWEKLREEATAAPGLP  
RSPEELKRHPFAEALFREYIRLYPPVSSSTAREATEDLTLHGKLVPKGTMITVPLGTYGYD  
PANFPEPEKFDP SRWMGRRIPPSSIETAPFGGGPHFCLGYHLAWVEVVQFATAFARELSR  
RGVRPQLAPGVAPPKLRYLPFGQPPKKALIEFVPVV

>CYFUS\_003343|KEGG|**CYP1284B2**||[Cystobacter fuscus]|cfus|DP

MSAFSGKKLDKIPAHVPPELVYEDNARDPRLLEDPHARMRSLILEAPPIFFTPYNGGNW  
VVTRKKAIVDITMNPEVYSNAFLVSGHQSEEHAGEHKEAQQGLMLLPVAADPPRHTAYRA  
PLNQPLSAKSVAGLETAIRDMTNELIDKVLAAAGRCDFLSDIAEPLPVTLMKLAGMPTDR  
LAEFRHLATQATSATVTPADREVTFKRIAGILAETIKARQEKREEDLISHLLDANINGRN  
PTFQEMLGYSIALFLGGLETVVNALSFGVRHLARDQELQAKLRADPSLLPGAIEELLRLY  
GIASTVRQVMRDEVCHGVQFKKGDTVSLLLPAANYDDAAFPDPEQFILGRKEQHQTFTNTG  
PHRCVGLNLARLEMKVIFYQEWLKRVPFRLDPEKKPRFVGGFNLAIASLPLVW

>CYFUS\_003436|KEGG|**CYP102J22**||[Cystobacter fuscus]|cfus|DP

MTPSLLPIQP RPWPLVGNLTDLDAEQSILSIMELARLHGPIFRLVFFGQSLIVVGSQEL  
VNELCDETRFGKLVHSSLRELRAIGGDGLFTAHTEEP NWGKAHRILMPAFGPLGVRDMFA



PMLDVAEQMLLRWERFGAGAVLDVDPQMTLRLTDLTLALCAFDYRFNSFYQDALHPPFVGAM  
VDGLHEAGVRADRPEVLNRLLLPSARRYAEDIRLMHAVADQIIITERRRDPDAGQKNDLLG  
RMLSARDPVTGETLSDENIRYQMVTFIAGHETTSGLLSFALYLLLKNPRVLHAARARVD  
EVLGGDTPRLEHLPSLRYVEQILMETLRLWPTAPAFAVRAYEDTVIGGRYAITPQDAVMI  
FPPILHRDPKVVWGPDVEAFRPERFDREAEARLPPNAWKPFNGQQRACIGRPFALQEALLV  
LSMILRRFDLIEDDPSYTLKIKETLTLKPEGFRIRARRRDLAALKSRSPVPGAPRGTPAP  
EPTPALARTEGPRTPLLVLVYGSNTGSAQAFAQRIGSDAPSHGYSVRVAPMDEHAGRLPTQ  
GAVIVLTASYEGQPPDNARQFVAALEAAPAGAFAGVKYTVFGCGNRQWARTYQAVPLQVD  
ALLEQAGATRLKPRGEADASEDDFFGAFDAWYATLWPALAATFGQEAAGTSEAPRLQVEVV  
RDNRESTLLRQEDLGAGQLVENRELVNLASPHARSKRHLEILLPEGMTYRAGDYLAVLPRN  
PGVSVERALRRFGFAQDSQIIIVHKEGARLTALPTGYPIAVSELLTSYVELGQPATRAQVE  
TLAKATRCPPPEKQPLEALAQEALYRREVLDKRVSVLDLLERFPACELSFAAFLEMLPPLK  
ARQYSIASSPLWNEHRCALTAVVVDAPAYSGQGRYLGVTSNYLAALAPPTRVSVAVRPSH  
PRFHPPTDPQEPLVMICAGTGLAPFRGFLQERALQAREGRRVGPALLFFGCDHPDADFLY  
REELEAWQRAGIVDVRPAFTYAPEGEVTFVQHRVWKDRADVAGFFQRGATVYVCGDGRRM  
APAVRETIVRIYEEATQVPREEAEQWALRMEREQGRFVADVFA

>CYFUS\_003477|KEGG|**CYP262B4**||[Cystobacter fuscus]|cfus|DP

MSETTSQTSSDRSLPVRVSSLPVGLPRLIANPLSFMEQAQREHGDIFSMDLGFTQVIG  
LCHPRYVHHVLVEHAHKYSKGGPMWDSMRTFMGNALPMSEGAFWKRRMIQPSFHHQRV  
SLMTDTMVEAIDECLLEWDLAALEGKPFVDVSVALSRVTMTVLVRTLFGSGLDKDDAEKVA  
QAFSFILEYFIAGMVTHSLPEWMPVPGRQRYRESIKMIDEIMRRLIERGREQASGEDNLL  
SLLLQAVDGESGERMTNEQLRDEALGFFIAGYDTTAAGMTWVLHALTQHPEVTDKVRVEL  
DAVVGTRRPGFADLMRMPYTRNVLQEALRIHSPSVWLPRLSVVEDEIDGYRIPPGVMMVI  
FTRLIHRHPGIWDDPLTFDPDRFTPERSEGRHKLAWLPFGSGQRQCIAKEFSLLEGMLIM  
ARIVSRYELSSVPGRLPQERVSTNLRTKDGMLNLRPRLPQAQVPRIQLSGTA

>CYFUS\_003785|KEGG|**CYP109AK1**||[Cystobacter fuscus]|cfus|DP

MQASDYNPLSSTVQADPYPYAALREHSPYIFNEQLGWYIVSRYEDVVAITKNPAVFSSA  
RAIVQPEKLDAAEKVAPISVRSFRRGILIGEDPPTHTKTRNLVTRAFTPKRIAEMEPRIR  
QIARELISQLPRSGEFDLIKDLAEPLPMIVIAEMLGVEPERRHDFKRWSDDAIAISFALV  
KGAELSGLEHSSREMADYMARALEARRQQPREDLIQALLDNGVREGLLSVDDASAFCRLL  
LVAGNETTTNLLGNGMRALLGHPDQLERLTREPSLIPNAVEEMLRFDSAAQALFRKTTQE  
VEVSGVRI PAGASVLLLFGSANRDPKRFQDPDHFVTRNVAGQVAFGHGIIHFCLGAPLAR  
LEAKVALEEELLTPDRQLSLVPGQRLNVAHFTLRGLKSLRLRTEPARSARASA

>CYFUS\_003950|KEGG|**CYP1335A2**||[Cystobacter fuscus]|cfus|DP

MTPPTDPYQAVTHPDPYPYYASLCARGGLQRIAGFEPWIAADAATVRAVLTSEACRVRPQ  
AEPVPSHLLGSPAGALFGRLVRMNDGAPSAAVKQALASALPTVMRAVDAESRRWSARLFS  
EPRLSLLPEKALQLPVFVLGCLLGFPFEEFLAESVREVDAYVRSVTQPGARTEGALGAVRL  
VERVTACLQAKPRAPELLGAFSSRMREEGGALEALVPNAVGLLTQAYEATAGLLGAALLA  
FARMPALREQLARGECSIDDVVREARHESPIQNTRRFIHACATVANQELEAGATVVVVVL  
AAANRDPRVNPQPDVFLPRRPERQTFTFGLGAHACPGRELAVTMVSAEVERVLASGLELT  
PLSKSITWRASTNARILGGLQ

>CYFUS\_004102|KEGG|**CYP167B9**||[Cystobacter fuscus]|cfus|DP

MSAQQTNPSENREPEVQFNPYAPGYDVNPHPALEKLRAVAPIFYWEQGRCWVVSRYEDGLT  
VLRDDKRFSPNRDDWEFASVLGSDALIPEMEELNKNGLFALGERNHARVRLVSPAFTPR  
ATERLRPEIQAIVDEILDSMAAKGRLMNVHEFSEIRIPARVIGSMLKIPKGNEELFLDFTN  
AVAKSVFAGALAPEELAPLRQIREGIVLVTTETIEDRRRNPNQENDILTTLIQTEEQGDKL  
NKQELLALVSSLIVGGFETT VHLSFCVYNLLQHPEVF AELRTRPELTKNLVEEVLRFDN  
FVKMGPARYALEDMELGGMPIKKGQMLVVLVGSALRDERAFDKADVFDVQRNASAGIAFG  
HGAHYCLGANLARLMGQIAMGTLVRRFP ERLRLVKQPSFGPHSLMRKMEVLEVDLGSPSA

>CYFUS\_004514|KEGG|**CYP102M6**||[Cystobacter fuscus]|cfus|DP

MSKPSLSTTIPQPRSRPLVGNVPDVGFTPLQNMMKLAREFGPIFRLSFPGENFLRVISS  
YELVADACDETRFEKMLGQVLLQLRDLGGDGLFTADAREPNWGKAHRLMPAFSPAAMRN  
YHDGMYDVADQMLTRWARFGPDTDIDVSDNMTRLTLDTIALCGFDFRFNSFYQREMHFV  
ESMVRALAEAGDRTRRVPLQTQLMLRTQRQYQSDLQYMYEVVRELIVRRRALPPEEAPKD  
LLGLMLEAKDPLTGEKLDDDNVRSQ LMTFLIAGHETTSGLLSFAVYFLLHYPEVLQKAYE  
EVDRLVGSEAPRFEQISQLQYIDQILRETLRLWPTAPAFTLHAKADNTLLAGRYPVGVKD  
TLMVLI PMLHRDPTVWKNPERFDPERFAPEVRDSIPTHAWKPFNGMRACIGRAFALQEA  
TLVLGTMLQRFHISTPEPYTLRIRETTLTKPDGLKLRVRARKPVS RAPAAARRAPT PAPVA  
SSSQPTEKTSSHGTPLLLLYGSNSGASEAFARRIASDGLARGYTAKVAPLDEYAGKLPKE  
GAVVIVTASYNGQPPDNARAFHTWLSNPAGALQGVRYAVFGCGNRDWGETYQAVPKFID  
ERLSAAGARSLLSRGEADARADFFGDFDYWYAPFWTRVGEGLGVASSEVDAGPRYTVEVV  
PPVSAELVKQNKLELATLVDNRELVDMTSPFGRSKRHLVFKLPQGVTYAAGDYLAVLPEN  
HPELVERAARRFGVSPDATVILGSARGDQGSSSLPTGRPVLVRELLGRHVELSAPATRKDL  
ERLAEKNPCPPHAMHLVALARDAERYKKEILDKRVSVLELLEQYTSCILSLGDFLELLPA  
MRVRQYSVSSSPLADPTECTLTVAVVDAEAWSGQGRFRGTCSSYLARLRPGEQVAVAVRT  
PNVPFHPPASNATPIVLVAAGTGLAPFRGFLQERALRHARGEAAAGPALFFF GCDHPEVDF  
LYREELAQWEREGVVKVLPAFFRQPDGDVTFVQHRLWKEREQVKALLDQGALLFICGDGR  
LMAPAARETLARIQKEKVGCSSEEALAWLAAMEKQGR LACDVFA

>CYFUS\_004527|KEGG|**CYP167B8**||[Cystobacter fuscus]|cfus|DP

MSHEQTKSETKSCFPNPNAPGFDVNPYPMFKELRQTPTISYWDQGHGWIVTRYEDVIAAL  
RDNKRFSTNSADWEFASTMGTAALIPERDELNRANLFSLPDADHTRVRRLVSPAFTPRAV  
EWLRPDIQAIVDELDDAAEAKGTINVVSDIADPIPARVMSSMLKIPKGREVLVQRFTEAS  
IKSLLPSLIPPEELVTVREAIREGIVLIRETIEERRRNPREDILTTLIQTEEQGDKLST  
PELLSLVASLIVGGFETT VH LIGFTLSNILRRPELFAQLKAEPELVKNVLEEVL RHDNFG  
KLGLTRYAREDLELGGVKIKKGQRLFLMTNSAMHDEAAFPHPETFDVRRNNTTTIAFGNG  
MHFCLGVHLARLEGRIAVDTLLKRFPDMKLVKPPTFGSHPVLRKMETLEVQLRARS

>CYFUS\_005195|KEGG|**CYP107HV5**||[Cystobacter fuscus]|cfus|DP

MPTITPPDFSSQQFKANPFPFYARLRQEAPVYHFTSLTKEPTWLVTTRYEDVSQVLKHASL  
SKDVFGAAGAERRAQMPWLLKIFEPVSQNMLSKDPPDHTRLRLSLVHKAFTPRLIEQLRSR  
VQALSDRLLDAAARKGSMDLVSEYALIVPVTIIAEMLGVPSPDYRK FQHWSNRLISNTSL  
WDVILSVPSVVMFTRYLRQLIARRRSSLGDDLLSALIQAEEAGDKLNADELVSMVFLLLV  
AGHETT VNLISGGTLALLQHPEQLERLRKEPGLIAPAVEELLRYASPVEVSTERFTKEDI  
TVGGVTIPRGHLVFAAIGSANRDERQFKDPTLDL GREPNRHLSFGMGIHYCLGAPLARL  
EGQIALQTLVNRFPKLRRLATSAQSLKWRTGVLMRGPQRLPVSL

>CYFUS\_005203|KEGG|**CYP1347B4**||[Cystobacter fuscus]|cfus|DP

MQSTVALVGMDRNPVSPQNLNNPIPLYHELREHEPVHWSEPLQAWVVTRHEDVMACFRDP  
RLSAERWKFFEYQIQGLEPETIREFMETTRDQMAMRVGPEHTRVRRQASAGFTPMKLEEM  
RACIHHTMAELLEGVRRERHGMNLAQEISYPLPTRVIAELLGVPAEDRDRFRRWSDTLAEF  
AAPAAGASMLGAARRANQAMMEMKAYFLPLIEQRRAHPTPDALGMMVQAEVGHMTAGEL  
VANAILLMFAGHTTTTDDQLSNCVHDLLTHPEQLQVLREEPERVRAAVEESVRFHPAVPFI  
FRVAVADV ELRGRLIHAGDVVFLGMAAANRDPRAFPEPDRFDITRDHTQHRHLSFGFGTH  
HCMGAGLARRELETGITLLEHLPLGLRLDETRPARLKCHSLNFRGFDVLPVRW

>CYFUS\_005279|KEGG|**CYP107HX5**||[Cystobacter fuscus]|cfus|DP

MVEAVRVNLQREFESPEARANPIPVYAKLRKLGPVLHSTALYGEGFVLP RYEEVVSVLKD  
PRFANDRRNVPGGTSM DRWWMPAILRLLVSSMVLKDPPDHRRLRNLVQKAFTPIMVENLN  
GRVEQITEELLDAAVRKPVVDLMEEFALPLPLTVISEMLGVPEPDRINFRKLIKVLDP  
SVSPIAFIRNYPHMLRLNRFLRRLVNLRRREQPGNDLV TALVQAEEGGDRLSEDELISMI

LLLFAGHETTVNLIGNVGLALVRHPDQLQKLREQPDLIDSAIEEMLRFTNPVGQVAPRFA  
KEDVEIAGVRIPKGSAVTLLIASANLDETAFPNADKLDITRSPNRHVSFGYGIHYCLGAP  
LARLEARVAIPALLQRFPRLELAVPAEKLRRWRPNIGLRGLEALPLSVSPASSAAERSAA

>CYFUS\_005395|KEGG|**CYP264A5**||[Cystobacter fuscus]|cfus|DP

MTQINLMSPEVLTNPYPYAELRRLSPVCQVEPHGMWAVSRYEDVLFVLKNPSLFSSSGF  
TVAWQPAWVGYNPMANSMITRDPPQHTRLRALLLRAFGPATIARLEPRVRATAERLASGL  
VDGADFIQTLALPVPAYVISEILGLDHQLLPYFKQWSDDIVAITPSPASPEAAERIRGTI  
AKLTEYVGKVIEERRRAPADDTVSDLLRAEVEGQRLTDVEIKDFLIILLIAGLESTTNLL  
GNSLLFLADHPEMMAHLRAEPSLIPSFIEEMLRYDGVAPGVPRLAASDVTLAGVTIPQGS  
MVFPLMSSANRDERKFPDPDRFDLHRGSQGGLAFGQGAHFCLGAMLARMEVRIVLETVLA  
RFQEVERLLGNIQYQCALTTTRGPVALPLRYIPVGG

>CYFUS\_005459|KEGG|**CYP1011E3**||[Cystobacter fuscus]|cfus|DP

MESVARPSVDVKELSTPRRSSIKFNMFDPAFHADPYPVYARLREEEPVHRTIMGAWIITR  
YADVKVLLRDNNFGVFDIPTRIERKSPFLERKKIGELRTLASAMRRWLMLCDPPDHTRLR  
SLVNRSFTPTAVESLRPRIQETVDQLIARVRSSGRMDIVNDLACPLAVTMIASMLGVPEE  
AHSSVTRWADGLSRVLDPLRSLEQYAEMNNVAQEFLAYFRELFAERRRNPKNDLISSLIA  
VTDQGDRLTEDEMLSVCMLMFIAGEKTTVNLLGNGMRALLLHRSEFERLRQDPTLIRGAI  
DEILRYDSPVQLNTRVPKKDVVLHGQTIIPAGDLVYFSLGAANRDPAQFEQPDFTDITRRE  
NRHLAFSGGIHYCLGAALALIEGQIAIGTLVREFPDMALVPGETEWMKEIIFRGPQTLPV  
TFTP

>CYFUS\_006003|KEGG|**CYP109R5**||[Cystobacter fuscus]|cfus|DP

MDLLSRFDLNPVEMRNPPYFAEMREKAPLHYDAKLQAHVLTRYEDVSYILKNPALFSS  
ADVRVAGKHQKERSQESGLEGVDSLLTTDPPVHTRLRGKVSRSFTPKQISAMEPRVRELS  
RELVAEMTASNEFEFMGLASPLPVTIIAEMLGVDTSRRRDFKRWSDAIANSNGNASFTGK  
TPEDVVRNAKEMLAYMTEVAEARREPRGDLISLLVQENEGQEALTPPEVNSFAILLLLA  
GNETTTNLLGNALTALIRHPEAYEWLRRDPTQAACAABAEETLRYDSPVITVVRRTTQEV  
ELSGGKVPANTTLFAVVSAANRDPKFPDPDRFDPRRDTTGLMSFGHGIHFCLGAPLARL  
EAPVALQELMARAPRLGFSRQPEHIDYGATFALRGPRVLWLQKN

>CYFUS\_006004|KEGG|**CYP109R3**||[Cystobacter fuscus]|cfus|DP

MDLLSRFDFFNPEVMRNPYPYFAEMREKAPIYYDAKLQAHVLSRYEDVSFVLKNHALFSS  
TKIRVAGKRQEERASVEELGSVSNLVTDDPPVHTRMRGLVSRAFTPKQISALEPRVRELS  
RTLIAEMTASPEFDFMEGLASPLPVTIIAEMLGVDTSRRHDFKRWSDILIHSSRAALQSG  
KVSEQVERSAREMLTYMKEVAEARRREPRGDLISLLVQETDGVAALTPPEVNSFTVLLLI  
AGNETTTNLLGNALNALIRHPEAYEWLRRDPSPAACAABAEETLRYDSPVIGLVRRTTQE  
VEVSGGKLPEDSTVMVLLASANHDPHKFPDPERFDPRRDTNGLMSFGHGIHFCLGAPLTR  
LEAPVALRELMERAPRLGFAPRQPEALDYGGSLFLRGPRSLWLQKN

>CYFUS\_006005|KEGG|**CYP109R5**||[Cystobacter fuscus]|cfus|DP

MDLLSRFDFFNPEVMRNPYPYFAEMREKAPLFYDAKLQSTLVSRYEDVSYILKNPALFSS  
AQIRIAGKLQTERNQDAGLEGVDSLTTDPPVHTRLRGRVNRAFTPKQISALEPRVRELS  
QECISEMTAHNEFEFMSGLASPLPVTIIAEMLGVDTSRRRDFKRWSDALVNSSNASITGK  
TPEEVIRSAKEMLAYMTEVAEARRREPRGDLISLLVQESEGEALTPAEVNSFAILLLLA  
GNETTTNLLGNALTTLIRHPEAYEWLRRDPSPAACAABIEETLRYDSPVLTLSRRTTQEV  
ELSGGKVPADTTLMVLVSSANHDPKFPDPRDFPRRDTAGLMSFGHGIHFCLGAPLARV  
EAPVALQELMARTPRLGFSRQPENIDYGASFLLHGPRSLWLQKN

>CYFUS\_006176|KEGG|**CYP242A4**||[Cystobacter fuscus]|cfus|DP

MTTTTAASLPSYDLFTPEMMANPMPTLHRIRAENPLVWSPQLNAYVLTRYADILAALKDR  
RLASSNMANWMDLLTPEQQQELLPVRQSIQLWMGHTNEQDHLRFQLLLKRYFTPGTVDAL  
RPRVRQLTEELLDAEPRGGMDVVEELAYPLPANVIAEMLGMPTRDREKLQAWSRDITAL  
FQRSDIHQLRRSQRSVLEMQDYLRPLLEERRRAPSEDLISVLLAASKEGTLSEEEIVSNC  
VLLLFAGHETTANLIANGLVLLFEHPDQFEALKARPELMATAVEEMMRCDGPASVISRVS  
IEPVEVCGRSFPAGQTFYLALGAGNRDPEVFPDPDRFDITRKPNRHLGFGMGAFYCLGAA  
LARMEADECFRILLRRFPNVRPAYQQPDWQVSPPLGHNLSLQVKF

>CYFUS\_006207|KEGG|**CYP1387A1**||[Cystobacter fuscus]|cfus|DP

MSSPSSPRPEAANASGCPFSARSFNPFAPPQHENMQALFAQARREQPVFFSEAMNAWVVT  
RHEDICAAVEDTQRFSSKLDSDQIFEALLPEPRAYLADAGYRKMPMIYDDPPEHSRSRQIV  
ARLFSKENLAALPLVRSITEELVDGFAQDRQVELVSRLAYPLPIRVIFAWMGLPLELMD  
DFKKWSRHLTLMLSLQARTLELQNECVRGVTDQMRCVAELISERVAHPREDGLTVLAQSL  
REGTTLDAADLAAMVLLISAGHETTSSLMGMAVRVLLLEQPERWRQLREEPHTLPRVVEE  
VLRyetPMAILARHTATQaelGGVTIPAGARVLLVVLsgNRDERRFpePEGfdPKRPQLG

QHIAFGRIHVCVGAGLARLEARMLEVLARRLPGLRIVEPPRLVPGPVRHQEQLLLAWD

>CYFUS\_006425|KEGG|**CYP107DL4**||[Cystobacter fuscus]|cfus|DP

MKPMDESQKQTVGVPSPAGTCPFKHLMEAPAPSGGSVVLDRNPEFLTAYATYARLRE  
QAPVVRTLFAFGVMDTRKVDSTRAGSTADLASSEERLLVTRYDEAVAALLDGSLSDFRTG  
MTPRQIEGLAHMPPEARPLADSLISRDPDHTLRKLVQPSFTARAMETLRPRVQRITDA  
LLDKAEREAAGRQAAADRQMDLLEAFAYPMPITVISDLLGIPEEDRERINHLAELLMNT  
DRFDASLAATRRDQTRRFNAYLEELFERKRREPAEDMISQMVHTQEEDGDRLGHEEMISM  
VHVLFFAGHLTTVNLIIGNGVVALFSDPDQARMVADPSLAKGMVEETLRYWGPVDYIGTA  
RTAIADTQVGGSVIPQETELSIGLGSANRDPSPFDPDVEDITRPEAHNRNIAFGKGIHVC  
LGAPLARLEGQIAFETLFRYPKRLRLAVPAEQKLGAGVGSVGLRGFARIPVLF

>CYFUS\_007441|KEGG|**CYP183BE1**||[Cystobacter fuscus]|cfus|DP

MRVPTAPARWPLLGHWSPLLSPRDRFLLSLEKVGSLVRVYIGQMPMVITDPELTRQVLH  
DSATFDKGGSLYEKLSELTGNGLLTSQSEPHKRQRLVQPAFKKSSIKDYSSVMAGVVEV  
ALRDWEDDAVDMKAAAYHIVSRIAARSMFSAEMADASIARIAEALSIYLNGLFVRTVGP  
GVLFERLPTPGNLRYKQALEVLHQEISRIISEYIASGVEREDVLSILLREKDEGDGAGLS  
PQEVHDQVTLLLAGIETSAATLCWCCLYLLSHHPDVTQRLQAELDGVLGGRAAQWDDIPE  
LKQTRRIVMEALRLYPGWLFTRVTMRDVTLGAYPLPRGTGIAYSPYLLHRSPSSFEQPD  
RFDPDRLWPERSNRLSMNSFVPFGGGVRRICIGEMLGVTVMMLTLATIASHWEARCVREGP  
IEPAPAHVSLIPKQLRMRVTRKR

>CYFUS\_007462|KEGG|**CYP109AK2**||[Cystobacter fuscus]|cfus|DP

MQASDYNPMLPAVQADPYPPYATLRENAPVYFNEQLGWYIVSRYEDVIAITKNPAVFSSA  
RAVVRPEQLDAAEKVAPTAVRAFRRGILLSEDPMPHTKTRSVVTRAFTPKRVAEMEPRIR  
QLARELISQLPRSGEFDLIKDLAEPLPIIVIAEMMGAEPKLRHEFKRWSNAVATFYALA  
RGAELSGIERTSQEMHDYMSQALEARRQQPREDLMQALLDNGVREGLLSVDEAIAFCRLL  
LVAGNETTTNLLGNGMHALLSHPDQLERLTREPALIPNAVEEMLRYDSAAQVFRKVTQD  
VEVSGTRIPSGANVLLFGSANRDPKRFQDPDRFDVTRNVAGHVALGHGIHFCLGAPLAR  
LEARVLEELLTPDRQLSLVPGQHLENVPNFNVRGLKSLRVRTEPAPGTRASA

>CYFUS\_008532|KEGG|**CYP167B6**||[Cystobacter fuscus]||cfus|DP

MSLEATKQSSPAVLFPQAPGYDANPYPMLDELRTKTPLVYWEQGRGWLLSRYEDAIEVL  
RDARRFSPNRDEWEFASVLGSAAMIPELVLSKTGLFALSGADHARVRKLVSPALTPRAI  
ERLRPEVQALIDEVLDEAAVKGTINVSDISDRIPARVIGSMLKIPKGRETFLQRFTEAS  
IKNFLPGLLRPEEVEALRADIREGIALVRETIEDRRKNPLPDDILTTLIQTEEQGDRLST  
SELLSLVAALIVGGFETT VH LIGFTTYNVLQRPELRAQLKTEPDLLKNVIEEVLRFDNFG  
KIGVARYALEDVELSGQTIKKGQMVLIIMNSALRDEAAFPKADTFDVRNTNASIAFGHG  
VHYCLGANLARLEVQLAVGTLLRRYPDMQLVRPPTFAPHPVIRRMETLEVQLRAQ

>CYFUS\_008546|KEGG|**CYP107DL5**||[Cystobacter fuscus]||cfus|DP

MAPNPLDEQQQQTPAQPPREAPFGGPVVLDKESLEFMTRAHAVYAELRDKGPIVRVPSGR  
GIVDRAQAERASPGASSPEQYFVTRYDEAVSILMEEKLSSDVLKAMPPEQRARMDAAMPE  
ELRPIVRSILVLDPPDHTRLRKLVPNFTARAMEALKPRIQRIVEDLLDKAEREAATRGE  
VSPDRRLDLVESFAYPLSITVISDMLGIPVEERETVYPWAERLLRAKGPEGMMDGETRAG  
LTAFANYLES LFARKRQAPAE DMISQMVQVQEDGDILSPQELLSMVFILFFAGHLTTVNL  
IGNGVVALLSHPEQHARFLEDPAACVKGMVEETLRYWGPVDFIGGPRIAE DL DVGGTRV  
PRGAKVAVGLASANRDP RRFTNPDAFDISRPAHRHIAFGKGIHVCIGAPLARLEAELAF  
EALFRRWPELRLAQPAQGLELSMGAALRGFKRIPVVF

>CYFUS\_008576|KEGG|**CYP264J2**||[Cystobacter fuscus]||cfus|DP

MQPTPDVMALAHRLNPYPLYAELRRDHPVCRVEPGGLVAVSRYKDVEYVLKHPELFSSHG  
FRFAWQPAWVDNPLAQSLAASDGKEHARLRSLSVRAFTPVAINRLEEKVRANAARLADG  
LLARGEVDFMEEFATPLPARTISDLLGIDPTLERHYKRWTEVLVSIAPVPENDEHVTRTR  
DTIAEMKRYVQQI IDARRSQPGDDVMGLIVQGPGDQRLGDQEIIGLAFTLLAAGLETTS  
FFFahalPLLAERP DVFERLRADRELLPKFIEEMLRYDGPVRGLPRIVTTDVELSGVRIE  
RGTCVLPLIASANRDEARFPHADRFDL DREQPGIPFGAGSHFCLGAFLARLEARAGLDAL  
LDRFSGFSLIPEGVVWNR SIVTSGPLKMPVRFLPA

>CYFUS\_008681|KEGG|**CYP1069J1**||[Cystobacter fuscus]||cfus|DP

MCAMISSQLGLEFTPLEPHFLENPFPPFYARLRREAPITFAPAFQFWLVSRYADVMTVFKD  
PRHYSSRDTLRPPVALPREVMAILEPAGYTS DYPLLGDPPAHTRLRALVGKAFNQARVN

ALEPRIRQLVGEHLDTLRDGEPRaelISQLISPLAMSVMTellGLPASDRERIKQWCDD  
KLFFVPIPLEQHLRAARGVADFRRYLRELVEDRRESPRDDLISLllARTEGDRPLDTDE  
LVALACVLVfAGHETSTNLLATALHHLRRHPGAWDELrkNTYLVRNAVEETLRYDSPVVG  
MMRTTTRPVQLGGTALPEGARLFLlFASANRDESvFEQGERFDIHRASAVRHLGFGHGIH  
YCVGASLGRLEAQLTLElllQRLPGLRLAPGEAVTYLPNLVHRVPRQLLVEWDT

>CYFUS\_008687|KEGG|**CYP107HU2**||Cystobacter fuscus||cfus|DP

MAERDVNAAQGPAPQPLPTEVVTLTLDPHISPETYARLRQQGRVARVSFTLGANAAPAG  
EKSAELIEFLGHEHLFVTRYEDVIAALLDDRISDPRTALTEEQKKKLPNVPDELRLPLAR  
SLLSVDPDPDHSRLRKLlQPSFTPRAMESLRSRIQRIAEDLVDGAERAAAERGESRPERRM  
DLIAEFAYPLPVKVISDMLGIPEEDREMVKGWTENLVKNNAGRGFRDAESLAKVREFTDY  
LRRLFVAKRKNPADDmISQLLRIEEDGDKLNEDETlSTVFILYLAGHVTTVNLIGNGIFA  
LLSHPEQLARLkanPSLVKGLVEETLRYWGPIDFISRRIAKEELDLAGTHFPKGEPmMLG  
LASANRDPARFAHPEVFDITRPDADKHIAFGKGIHICIGAPLARMEGQIAFETLIRRLPE  
LRLAVASEELHWSNSLLRGFAQLPVLF

>CYFUS\_008947|KEGG|**CYP107DP5**||Cystobacter fuscus||cfus|DP

MSTSTLTSELWAPQTRTNPLPFYARIRQeAPVVRMIDPYFQTPVWIVTRYKEAVELLRDN  
RFTKDQDKLPENSPSRMRIDSLAAINQHMLSADPPDHTRLRTIVSKAFTPRRVEELRPR  
VTAlAQRLlDEAWPQGSMDLLDSFAFPLPVTVIAEMLGVPAEDQDQFREWTNIIINPPVN  
GDVGPLQKAGMQFLQYFQQLMARRRAEPRDDLlTALMTAEeEQGDRLSPTELVSMLFllLV  
AGHETTVNLMGNGVWALLKHPEQLERLRANPALIDSAVEEMLRYRGPVETTTTYRWALQDT  
ELYGQVIPAGEAVLASLMAADHDPAQFPEPERFDITREPnrHIAFGFGIHFCLGAPLARL  
EATVALNlllLERMpRLRLAVDERELRWREGILVNGLQRLPVAf

>CYFUS\_009336|KEGG|**CYP102M7**||Cystobacter fuscus||cfus|DP

MNKPSHSSTIPQPHVRPLVGNPVDVGFETPMQNLMKLARELGPIFRLSFPGGRtSLILSS  
HELvADVCDERSFDKQVSGALKQIRDFAGDGLFTAMTEEPNWGKAHRLlMPAFGPAAMRN  
YHDDMLDVADQMfTRWERFGPDAVLDPDNMTRLTLDTIALCGFGYRFNSFYQKEMHPFV  
ESMVRALAEAGNRARRVPLQTQLMLRTQRQFQADIGYMHEVTRELIASRRALPPEEAPRD  
LLSLMLDARDPLTGEGLDEENIRNQMVTFliAGHETTSGLLSFATYFLLRHPEVLEKAQA  
EVDRLVGDEMPrFEQVSQlHYIDQILRESLRLWPTAPAFSVHPKAEETliAGTYPIRRDN  
TAVVLTTMLHRDPTVWKDPERFDpDRFAPEVRDSIPPHAWKPFNGGQRSCIGRAFALQEA  
TLVLAMMLQRfHLVEPAPYELHVRETlTLKPEGLKLRVRVRKPVSRPLASRPTPGAAAPA  
PKQEGVASHGTPLlllLYGSNSGASEAFARRIASDGLARGYSAKVAPLDDYTgKLPKEGAV  
VLVTASyNGQPPDNARAFHTWISNVPEGsLLGVRYAVFGCGNRDWAATYQAIPKHfDERL



SAAGAEALVARGEADARGDFFGDFEHWYAPFWEKVGAAALGVSSRAVSSEPLYTVEVVPSS  
STELVKQNKLELATLVDNRELVDMTSPLGRSKRHAFKLPEGVTYAAGDYLAVLPENHPD  
LVERAARRFGVRTDAAVVLHSTRGAMASSLPTDKPVSQVQELLGRHVELSAPATRKDLERL  
AEKNPCPPHAMHLAALAQDAERYKKEILDKRVSVDLLEQYTSCLLTFGDFLELLPAMRV  
RQYSVSSSPRADPTVCTLTAVVDAEAWSGQGRFHGTCSSYLARLRPGEQVAVAVRTPNA  
PFHPPASNATPLIMVGAGTGLAPFRGFIQERALRHARGEAAAGPALFFFGCDHPEVDFLYR  
EELAAWEREGVVKVLPAFFRQPEGDVFMFVQHRLWKEREQVKALLDQGALFFICGDGRMA  
PAVRETLAKIHQETVGCSEAEATAWLEGMEKQGRLVADVFA

>sce0122|KEGG|**CYP109C1**||[Sorangium cellulosum So ce56]||scl|DP

MNLFPDEMRRDPYPLYDQLRTGSPVFHVAPLDDLWMVFDYDGVKRALTDHEAFSSAVAPPT  
GKAPDWIVFSDPPRHTKLRSIVLRAFTPRSIAGLEPRIELSRDLLDPWIERGEMDLAAD  
YAGPLPTMVIAEMLGVPPEDRARLLRFSEVIVNLSHAISGEEAARAVSEHAVVKEEMKV  
YLAGLIEARRRAPAEDLLTRLVEAEVDGERLTEGDILNFFQFLLAAGTETATNLIDNAIL  
CFLESPAELFRLRAPELLPSAIEEVLRHRSPLQMVFRETRRAVEVHGQVIPAGKLVLPV  
IGSANRDPHQFHDPPGRFDIGRDPNPHVAFGHGHIHFCIGAALARLEARIALPDLLCRLKGL  
RRASDEPWEPRKAIIVHGPARLPIRFEPGRRAAVHAAGAHTPCPG

>sce0200|KEGG|**CYP261A1**||[Sorangium cellulosum So ce56]||scl|DP

METARAEVAPSAGMRDLSTLPGPRRLPLLGNLLEIRPSQFHLTLEGWNRKYGDLYTFWLG  
RTPVVVVGSAELVQRILRERPKEFRRWSPLQELIDEMGGGVFSAEGDQWTRQRRLVMSA  
FTAGQLRESHGTLSTITRRLRERWRASAARGAPVDARRDLARYTVDVTTAVAFGLDMNLI  
ERGTDPLSDQLETVFASLNRRVFAPFPYWRHVKL PADRALDQALSEVRTRMLDILRTTRA  
ELDRDPARAAAPRSLLEALLVARDADDPKARLSEQEVLGNVLTLLLAGEDTTADTMAWML  
HFMALRPDVQARMRAEVDDELGDADLPESPEHAQRLRYLGAVAQETLRLKSAAPILFMEA  
CADTVVGSRLRAAGTRMILLTRQIALKEEHFHDAASFMPERWLT PRPAGAGKHD PRAALA  
FGSGPRVCPGRALSMVESAMVGAMVARDFDVSLVDPARPVKELLGFTMKPEGLFVRFP  
HR

>sce0675|KEGG|**CYP267A1**||[Sorangium cellulosum So ce56]||scl|DP

MNSPDAPKPDAPPAANPAADADLDPFRLQSPETLANPYPVYARLRQEAPVYFSAAYNGWL  
ITRYDQVAAGFRDPRLSAKRSSAFVTKLPDEVRQRLEPLRRNLASWALLLDPPEHTRIRS  
LINKAFVPRLVEGLRSRVETLVNELLDVAPAGRMDVLRDLGDLLPLLVIGEV LGVPAED  
RHRLKGWSNALSGFLGAGRPTLEIAGGALSVAELEDYFRGVIAARRQSPGNDLLSQLIL  
AEEQGMILGEQELLSTCCMLLFGGHETTKNLIGNLLALLLHRSEREALRATPSLIGPAV  
EELLRYDSPVQWMSRVALDDIELDGVRI PKGDRAFLVLGAANRDP AQFPDPDKLDFRRTD

IRHISLGLGVHYCAGSALARVEAQAAISTFLRRFPDAELSPGPLTWRMNPGRGVTALPI  
ELGPQSSAS

>sce1588|KEGG|**CYP260A1**||[Sorangium cellulosum So ce56]||scl|DP

MDFPLANLFFVPSEDATAFGRRLRAAAQQAPIVFDTAFGMPILLRKSHITTAYRDTATFS  
TRMFQAGILNNGGLAAMQGDEHARMRRVYNMFFLPRAVSQYEERFVRPISEQVVDRLAGKP  
RVDLLEDFAMELPRRVIGELFGFPAEKLHETDERVRAMLRLGLVRMHDPAAVAESQRAYGE  
TLGLITEVVERESRDTSDTLLGEILRTLKAEHMDTIEASRQIVLSLILGGYETTSWLVAN  
TIHALLAHPDTLARVRQDPSLLPAAIEEGMRWCPSSFGVLRMVERDVRLDDQALSAGTVV  
CLAGIAGNYDETAYPSPEYDIDRKPLPAANVFGGGAHFCVGAPLARMEARVGLQALLAR  
FPGLRAVPEERPSFMYGAKDSVAHGPDKLPVLLH

>sce2191|KEGG|**CYP262A1**||[Sorangium cellulosum So ce56]||scl|DP

MVGLLPALARDAPSLRLRLARQYPGELIELDLGLTRAYLATHPEQVQYVLHDNWRNFGKE  
GGMWKPIGRLLGNGLVTTAGGDEWLRNRRRMQPLFSSRQLAGLVDRMFDVVEGDLPRLEER  
ARAGAVVDMDKEMMQLTQRVILATMFGVSITPREADSLGEVLLVAIQALNARMFLYFMPD  
RLLPGERALRDAIARIDEAILRLVRERRRSKEERDDLLSLLLRARDESGSGMDDRQLRDE  
LVTMFIAGNETTAITMTWLFYLLDRNPGIERKLRAEIEEVGDRRPTAADLSRMEYTKMV  
IQEAMRMYPSPSWLVPRTVKEDDQICGYPVPAGATVILSQYVMHHDPAFWEAPAEFDPERF  
TPERSASRPYSYMPFGGGPRQCIGNLFSIMEAQIVIAVLLRRLRMRLVPGHPVSPQAVA  
TLRPRHGLKMTLHAV

>sce3065|KEGG|**CYP110H1**||[Sorangium cellulosum So ce56]||scl|DP

MSQLPRGPRSRLLTTYKFLTRPFEFLTHCAATYGDVFNVPVVSVDVVIAGGPRTVQDVMT  
APPETFLPFATRAIAPLVGEHSLMLSDERHRRERKLLTPPFHGDRMRAYAAAMADTAAR  
RLTEAARAPRAVAQELTQAISLDVIRAVFGVEEPSRTSAFARAVVAMTDALTPALTFLP  
PLQRELGGGLGPYARFRRRVGELDALFRAQIERARAAPGDDILSLMVSARYDDGSRMSDQA  
IFDELRTLLFAGHETTALALAWALDHVHRHPGVLARLRDEIDALGPEPDPERLAALPYLD  
AVCKEALRVYPIVTESPRLLAQPFRLGEHELLPGTGVAPCILLVHHHPELYPEPSRFRPE  
RFLERKFSPFEYLPFGGGHRRRCIGAAFAMFEMKIVLGVALSAWEFRLLDERPPRPVRRNL  
TLSPSGGVPLVLRARGRSRLYAAA

>sce4633|KEGG|**CYP109D1** ||[Sorangium cellulosum So ce56]||scl|DP

METETAPSPSPEQIDLSAPSVIADPYPAYRALRGRSPVLYARVPAGGAAGLGEPIRAYAL  
LRHAEVLAALRDPQTFSSNVTDKIRVLPKITLLHDDPPRHThLRRLVSRSTPRRIAELE

PWIGRLAASLLEATGDGPSDLMGAYAMPLPMMVIATLLGIPAERYVQFRSWSESVMSYSG  
IPAEERASRGKAMVDFFAAELEARRRAPSGDLISALVEAEIDGARLDTPEAVGFCVGLLV  
AGNDTTTNLIGNMAHLLSERPELYRRAQQDRSLVGPIIETTLRHSSPVQRLLRVTTRPVD  
VSGVMI PAGHLVDVVFGAANRDP AVFEEDAFRLDRPPAEHLAFGQGTHFCIGAALARME  
ARIALNALLDCYESITPGEAPPLRQTRAIMPLGFESLPLVLRRSRATA

>sce4635|KEGG|**CYP259A1**||[Sorangium cellulosum So ce56]||scl|DP

MLSLGRTDHDSFPTAAGELPVLGHLPVLYRDAIGLLRRSRALGPLFWVNLGFAQRRIFY  
VGADALDLLRAPEVVMHDHPEHIKIVGRSMAAQDGPLHRHMRSAINPSFSPQGFAKEAAA  
AIASAIAAKIDAWLQQESFAVHPAMRDLTLDIILRICGVPTGDIRAWSRAYRELFGLGVYP  
IPGRLPGMPAYRSDRARAWIDDLRLKLLALARGGGAAGSLVEMLSNARDDEGEPLSDQGI  
VDNLRAIVLAGHETSASILAWIVIVLSRRSEVWSALCDEHAAAPDAPVPMASAREADRLPV  
ANAI FREVLRMYTPVWFIFRTVTETITLSGRRI PRNTPLALSPAQFGYDPSLFPDPDRFD  
LSRWRDRSIPPGPLELAAGGGPHFCLGYNVACVEALQLQFILVRALRRAGLVPHPLEGAS  
PKHVYFPTGHPTAATRVAFRR

>sce4806|KEGG|**CYP260B1**||[Sorangium cellulosum So ce56]||scl|DP

MLPRKNLFSFTSKDPSAFGIHLAAAAREHSVYFDEGLGVPVVLRGADVAVLRDSETFST  
RTYDTGIMKGALVTLGGEAHTMRRLFNAVLSPRVISRYEEATVTPVARRVVERLVRKER  
AELFDDFAISMPMGVTSALFGLPEERIAENDALIRKMIRSVMPQDPVVVAEGRSAHAAM  
EAQLREIAEREVAHPSDTLLGEIARAIVAEGLGGEACEGVVLTLLILGSYETTSWMLANL  
LVALLAHPDAMNQLRQQPSLLPQAIEESTRWCSAAGIVRFVEREATIGGETLAAGTILY  
LSLIARHYDEEIYPRPETFDIHRPVGMLNFGGGLHYCVGAPLARMEARVGVSLLLERFP  
ALRADPTVQPTFSTAPRGAAFGPDQIPALLV

>sce4885|KEGG|**CYP263A1**||[Sorangium cellulosum So ce56]||scl|DP

MSATLERQPPGPGPLASRLRYLANFRTGDMRHYEDLFARHGDVVRLRAPGAEDFVMAFHPN  
DIAHVLRTNARNYPKGKRYHELAPVLGWGLVNSEGELWRRQRRHVQPQFNHANTLKFVPI  
IVEHMEAVLRRWDAQPGEFERDINDMDMTVTFGIAGEAFFGAALHAHTDTVREAFKYALS  
IALKRMYSLVNPPLSWPLPSHLRFRRAMDRVHAVIDGIIIDGYQRGAGGEDNVLVRLMNSV  
DPETGAKMDRAQLRDEIKTILMVGHETSSVTASWALYQLARHPEVCARLTDEIDRVLGGR  
SPTARDIESMPYLTMVFNECLRLLPSPVFILRSPLEDDVIGGYKVAAGSTVAIVPWVTHR  
HPEFWSDPLEFKPERFANHRRSADDKLAFIPFGAGQRICLGEFMGQLEGKIMVAMALQRY  
RLRLVPGFDPRCRGFISLQPVNGMRMILKRREPSSAVRAAPAGREEPAGAEPPVTEPVAA  
AMSAHGCPYSARA

>sce5528|KEGG|**CYP117B1**||[Sorangium cellulosum So ce56]||scl|DP

MTTALPASFADLPLLQGRNPLARRIETRHGFPILPGRFPVVGHMPAIAVDELGLLREGQR  
RFGSLFFWAPGVDWQLIYASNEAFSLFKSKAVDSSYLTEGGVGHLFGQTLMAHDGASHR  
RLRTAMNGPFPSPKGLDAAEVGAIVATSVERKVRSWLGRRDVQLLRETRELALVFMKITG  
VEDDELPEWRHYIEDLMLVILSLPFDVPGSPRRRGLRARAWLDERIGRILAGVRARGDAK  
GLLPALLTARDEQGEPLSEQDLVGNLRLLLLLAGHETSASVMAWCVAHLAESPVWRALRE  
EASSAPDLPRSPADLRRFPFAEAVFREARLHPPVPHDARRAVADFELDGRAVPAGTHVA  
IPLVLLSRDPELYPDPDSYRPERWLGRKEALSPLAIAQFGGGAHFCLGYHLAWMEIVQFL  
VALGRELPASGPRLQGGFPASRYLPVLRPSGGTRVRFDG

>sce5624|KEGG|**CYP266A1**||[Sorangium cellulosum So ce56]||scl|DP

METQVAATQPEINIIAPENLRWPYPMFRLLLLLEEPVFYDKNTGSWVVSRYEDVNALLRDA  
RMSADRYVALADTVPEQKEMNSYIVKSLSMFMLNVENPTHFRLRNLTNRSFTPKSIAAM  
RPSAHAVVNELLDVAVQPRGHMDVVADLAYPMPFIKFCGILGMPVEDMGLIKQLSDDVSVY  
IGSAGKAAGCIPPAYHAIVEFSKLFRLPVEARRKEPKDDLISSMVTTRVDGDSLSDDEVI  
ANCILFLVAGFETVTNLIACGTLALLEHPDQLELLKRD SRLMEGAIDEMLRYYPPVNRTA  
RLCVEDIPLRGKVIKKQIVVLM LGAGNRDPSEYPDPDRFDIARENRSRPLSFGGGHHFC  
IGSHLARMEGEVALGALLQRMPLRLATQEVWVRGNSRFRGLRALPVSF

>sce6323|KEGG|**CYP264A1**||[Sorangium cellulosum So ce56]||scl|DP

MSERVDIMTPAFRADPYTPYAAMRREAPVCQVDPGGMWAVSRYADVATVLRSPERFSSQG  
FRAAWQPAWVGHNPLASSILAMDGPDHARLRGLVSRAFGAPAIARIEQRARDLCERLAGR  
LDGEVDFIAAAAAPLPAFVISELLGLDHALEPHFKRWMDLLSVTPEPASAEHAARVRAT  
IAELDRYMADVIAARRRSPSDDLVS ELARAGELLGDREIIDLLVSILGGGLETTTHFLGS  
SMLLLAERPAELERLRASPQLIPRFIEEMMYDGPTQSVPRLTTS DVALAGVTIPAGSLV  
LALVGSANRDEVRF TDPDRFDLHRGQPSLTFGHGAHFCLGAALARMEAKVALEVLVPRIG  
EVTRAPGEIPYNRTLTVRGPVSLPLRFRPA

>sce6424|KEGG|**CYP110J1**||[Sorangium cellulosum So ce56]||scl|DP

MGNLPPGPKSLSLVD TIRAGFISSEP VFRRYAAEYGPTFRLRSPNGILTITGDPEAIRAV  
YTADPDEFDVWGVQLTEPVFGTSSVVVTAGARHRRDRLLAPPFSAGAMRGYGD AIAEIS  
LDVASRWRPGRSFSMLAATQAIALDVIVRVVFGVRGEARVGR TREAVLGLIESLSPSFMI  
IPALRRDFAGFGPYARHKRAARALDALLFEEIRARRAEGDASQDILGLMMSARHDDGAGM  
SDVEIADQLRALLFAGHETTAMSLGWAMYWLHREPAVLARLLDELDTLGPAP EADALASL

PYLEAVCLEALRLHPPVVDVARVVKRPFRLKGYTIPAGEAIAASPLLLHGREDLYPSPER  
FRPSRFLDRKFTPFEFIAFGGGARRCLGAAFAMYEMKVALGTILGRYRLRLESQAPIHHV  
RRGLTMGPSGDVAMILEGERERARAEGRPAAVQGSPAEPALRPAAPQPAGRCPMGFS

>sce6630|KEGG|**CYP266B1P**||[Sorangium cellulosum So ce56]||scl|DP

MGQAPATCTAASPVAAPSSRGVAGRARSTGAYRSCPSPAATDWTGHGHDRRRGGSGVRRN  
CHLEPDRFDITRQQSRHLTFGSGAHYCPGASLIRMEVEESVRALLSLPRWELAEETLSYA  
GSNLQDRGPSSLRVRFPAACSGRARPIGRRAAGR

>sce7867|KEGG|**CYP125E1**||[Sorangium cellulosum So ce56]||scl|DP

MTPQTVDILDPDLYLAGAPHDRFELLRREAPVHWHPEPAGRGFWAITRHADVARI SRDPA  
AFCSGRGLFIEDLPPGDMRDNPDMIMMDPPRHARFRA LVSKGFTPRVIQRLESHVREL V  
TRLIDDACERGGCDFASDIAGKLPLSVILEVIGVPREDQE QMLDWTTRFFGASDPAYGVT  
PEELNAVLHNMNAYAHQLAEQRRKEPKDDMLSLLMAAEVDGEKLSYTEFGGFFNLLLTAG  
HDTTKNLISNGMLALLEHPDQRRRLDDPSLLPTAIEEMLRFTPPVYYFRSAVRDIELH  
GQRIAAGDKVVLWYVSANRDET VFSDFHRFDVGRTPNEHLSFGIGPHVCLGLVLARLEAR  
VAFEELLRRLPDLELAGPAVRLRSNWVSGVKSMPVRCARPAR

>sce8224|KEGG|**CYP265A1**||[Sorangium cellulosum So ce56]||scl|DP

MSTPHTLQPDDLMEEGGDVVRRAQEACWYAETSMGKAVLRYREVDLLRDARFRNMGTDV  
LTRQGVTEGLVRRMYEGFLLSTEGA AHARLRGLLKKGFTPD AVDALRPRMRERMHALLDE  
IGDRTEFDVFTAVAERFPGQVIIELLGLPVSFEDPDFRRWCSDLGYIVGLEVKKHLPRLE  
AAFEGLRGYIEPTIAARRAEPRGDLISTLAAAEQNGDRFSEEE LVCQIVALLFGGLDTTR  
RTIGKAFLVMLEHPDQRRLLQERPDLAEPA AEEILRYAPGTRVAVRVATCDLELHGVPIR  
AGEMVIAATGAANRDP RVFEAPETFDITRRGAAPLSLGAGPHHCLGAYLARAELQEAVPI  
LTRLTEAALASPVVVRTAREGSPGPRVIPLRCRVRPR

>sce8551|KEGG|**CYP264B1**||[Sorangium cellulosum So ce56]||scl|DP

MTRLNLFapevrenpyfyAALRRESPVCQVDPNGMWVTRYDDIVA AFKNTQVFSSAGL  
RMATEPPYLRRQNPLSGSMILADPPRHGQLRSISSRAFTANMVSTLEHHMRSMAVRLTDD  
LVHRRVVEFISEFASRAQVSVLAKLIGFDPGLEGHFKRWATDLVIVGVIPPEDHARIAEV  
RRTIDEME QYMLGLLASRRRHLENDLVSELLRSRRDDDGITDQDLVSLLSLLL VAGLETS  
TSLMTHMVLILAQRPMWMDRLRAEPALIPH FIEEVMRFEAPVHATMRLTVTETELGGTRL  
PAHAVVALLISSGLRDEARFQEPDRFNPERGDQANLAFGHGAHFCLGVFLARVQARIVLE  
ELLRRCHRIVLRTDRLEWQAALNTRSPVALPIEVIPVSTTAARESPVVQGIW

>sce8913|KEGG|**CYP109C2**||[Sorangium cellulosum So ce56]||scl|DP

MNLFSEEMRRNPYPAYDQLRSRTPVLHYPPSDSWLIFDHDGVKRALHDHDAFSSVVSPPG  
TRTAEWLIFSPPRHTKLRLITRAFTPRVAGLEPRIRRLSRELLDRTIESGQMDVAED  
YAVPLPLLVI AEMLGAPAADQPHFKRWSDAILDLSHTVSGSEEAARALDAFTAVTAEMQA  
YLRGLVEQRRAPEDDLLTRLVEAEVDGERLNEDEILGFFQLLL VAGHETTTNLIGNAML  
CFLENPDELARLRAAPELLPSAIEEVLRYRSPVQAMFRVTRRDVPMHGQVIPAGKAVLAM  
IGSANRDSQQFRDPDRFDIARDPNPHIAFGHGIHFCIGAPLSRLEARVALADLVARLGGL  
ERASDAPWEPRRAIHVHGPARLPPIRFAPGPRLGGAPG

>SCE1572\_00630|KEGG|**CYP109C3**||[Sorangium cellulosum So0157-2]||scu|DP

MNLFPEMRRDPYPLYEQMRSSSPALHIAPFDLWMIFDYDGVKRALTDHDAFSSAVTPPT  
GKAPEWIVFSDPPRHTKLRGIVQRAFTPRSIAGLEPRIRELSRELLDQRIEHGTMDLAVD  
YAGPLPTMVIAEMIGIPAEDRARFMRWSEAIVNLSHTLSGGEAAARVSEHAHVKEEMKA  
YVADLLEARRGAPEDDLLTRLVEAEVDGERLNEDELLNFFQFLLAAGTETTTNLIDNAIL  
CLLESPELARVRAAPDLVPSAIEEVLRYRSPLQMVFRETRRAVEVHGQAIPAGKLVLPV  
IGSANRDSRQFRDPGRFDVARDPNPHVGFHGHGIHFCIGASLARLEARIALPDLLTRLRGL  
ALASDEPWEPRKALIVHGPARLPVCFEPGRRAGAGAAGAHAASP

>SCE1572\_04555|KEGG|**CYP267A2**||[Sorangium cellulosum So0157-2]||scu|DP

MNSPDAPKPDATPVATPAADADLDPFRLQSPETFANPYPVYAKLREQAPVYFSAAYNGWL  
ITRYDQVAAGFRDPRLSAKRSGAFVTKLPEDVRQRLEPLRRNLASWALLLDPPEHTRIRS  
LINKAFVPRLVEGLRSRVEALVNELLDAVAPTGRIDVLRDLGDALPLL VIGEV LGVPTQD  
RHRLKGWSNALGGFLGSGRPTLEIAGGALSVAEMEDYFRGVIAARRQNPGSDLLS QLLV  
AEEQGMILGEQELLSTCCMLLFGGHETTKNLIGNLLALLLHPAEREALRESPALIGPAV  
EELLRYDSPVQWMSRVALDDIELDGVRIAKGDRAFLVLGAANRDPSQFPDPDRLD FRRTD  
IRHISFGLGVHYCAGAALARVEAQAAISTFLRRFPDAALSSAPLTYRQSPGIRSLTAMPV  
ELGAQSSAS

>SCE1572\_16700|KEGG|**CYP110AD1**||[Sorangium cellulosum So0157-2]||scu|DP

MTTLPKGPSNNILVNIQGMLDPIGYTLRMRERYGDPMSCPKMNGKPVLATGSVEGLRSVF  
AVPPENLDQMLGESFTAAVGESSFLSLSGARHAAMRKLLMPPFHGQRMRLYGKQICDLTL  
QCSQDFKPGQLQLVAQDLMHKISLQTIIHLVFGVTTPAEAAARLEELLEELRKSFSFGLTIT

LIIPWLRREFRGFGPWARRQRATRDRLRSFLDREVARRRAEPAERTDILSLLLEARQEDGT  
ALDDQQIFEQ LHTLLFAGHSTTAGALSWVLYFLGHAPAALRRLQDELTA LGADPEPEALA  
KAPYLEAVCNETLRLRPPSPGVGRKLNAPMQIAGYELPAGAGVFAQIIWAHNPVAVFPEP  
AVFRPERFLERTYSPFEFLPFGGGNRRCIGAAAFALYEMKLILGTLLRRYSFELVSKKPVR  
VGLQGLPGSPVRVIVR

>SCE1572\_18480|KEGG|**CYP110H2**||[Sorangium cellulosum So0157-2]||scu|DP

MAPDAAAAPRRRPHRWIDPGEAPRATGIELLPRCAMSQ LPRGPQGRLTTYQFLTRPIEL  
LSRCAATYGDVFNVP MYNGDVVMAGSPASVQDVMTAPPDALVTYATKSIAPLVGEHSLLM  
LSGERHRRERKLLTPPFHGD MRAYAAAMADVAARRFAEAAARAPRAVAQDITQAISLDVI  
LRAVFGVEEPSRMSAFARAVVAMTDALTPALTFLPVLQRELGG LGPYARFRRRV DHLEAL  
FREQUIERARAAPGDDILSLLVAARYDDGSSMSDQAI FDELRTLLFAGHETTALALAWALD  
HAHRHPAVLARLRDEIDALGPEPDPERLAALPYLDAVCKEALRLHP IVTEAPRMAAQ PFR  
LGEHTLPPGTGVAPCILLVHHRAELYPEPSRFRPERFLERKYS PF EYLPFGGGNRRCIGA  
AFAMFEMKIVLGVALSAWEFRLLDERPPRPVRRNLT LGPAGGVPLALRARGRAALRTAA

>SCE1572\_24990|KEGG|**CYP167A1**||[Sorangium cellulosum So0157-2]||scu|DP

MTQE QANQSETKPAFD FKPFPAGYAEDPFP AIERLREATPIFYWDEGRSWVLTRYHDVSA  
VFRDERFAVSREEWESSAEYSSTIPELSDMKKYGLFGLPPEDHARVRKLVNPSFTSRAID  
LLRAEIQRTVDQLLDARSGQE EFDVVRDYAEGIPMRAISALLKVPAECDEKFRRFGSATA  
RALGVGLVPQVDEETKTLVASVTEGLALLHGVLDERRRNPLENDVLTMLLQAEADGSRLS  
TKELVALVGAI IAAAGTDTTIYLIAFAVLNLLRSPEALELVKAEPGLMRNALDEVLRFDNI  
LRIGTVRFARQDLEYCGASIKKGEMVFL LIP SALRDGT VFSRPDVFDVRRDTSASLAYGR  
GPHVCPGVSLARLEAEI AVGTILRRFPDMKLKETPVFGYHPAFRNIESLNVILRPSKAG

>SCE1572\_32890|KEGG|**CYP105AC39**||[Sorangium cellulosum So0157-2]||scu|DP

MIMTESVHTVGLLP TAREPGCFDPPNELRQAREHGPI SRYPFPGGYEGWLITGYDLVRS  
VLADSRFSSRKELMRHPLIDL GDMKI PPAPPGEFLLMDEPEHGRYRKLLTGKFTVRRMQL  
LTERVEQVTTEHL DAMEKAGPPVDLVTAFAKPIPTIMICDLLGVPYETRDSFQEHVDAIF  
SGVSKQDQVAGYVATQQYIAQLVA AKRANPTDDVLSDLTDTDLTDEELMGVGLLLLAAGI  
DTTANMLALGTFALLSNPAQWATLRARPEIADLAVEELLRYLSVAKTFQRTALEDVELGG  
QTIKAGTTVILSYNTANRDPERFDNPHALDIRRQAIGHLAFGHGIHVCLGQQLARIEMRV  
ALPALVQRFP TLRDLVA AEDVDLRPETADIFGVNSLPVTWNA

>SCE1572\_38035|KEGG|**CYP110J2**||[Sorangium cellulosum So0157-2]||scu|DP

MGSLPPGPKSFSLVDYIRSGFISSEPVFKRYAAQHGPTRVKSPNGMLTITADPEAIRAI  
YTADPDFTFGVWAAELVEPVFGTTSVVVTTGARHRRDRKLLGPPFGAGAMRGYGEAIADIS  
LGEASRWRPGRSFSMLAATQAIALDVIVRVVFGVRGEERVGRTREAVLALIDSLSPSFFV  
LPALRREFGGFGPYARNRRAARALEALLVEEVQRRRAAGDASQDILGLMMSARHDDGGGM  
SDVEIADQLRALLFAGHETTAMSLGWAMYWLHREPAVLARLLAEIDALGSPSPAPDALASL  
PYLEAVCLEALRIHPPVVDVGRVAKRPFQLGRYTIIPAGESVAASPLLLHGREDLYPSPER  
FRPSRFLERRFSPFEYIAFGGGARRCLGAAFAMYEMKVVLGTILGRYRLRLESQAPIQHV  
RRGLTMGPSGGMAMILEGERERPRAAGGGAAAEGSQAEPALQGVASGPAARCPMGFS

>SCE1572\_50855|KEGG|**CYP109C4**||[Sorangium cellulosum So0157-2]||scu|DP

MNLFSDEMRRNPYPLYDQLRSGSPVLHYPPSDTWMIFDYDGVKRALHDPEAFSSVVSPPG  
NRTSEWLLFMDPPRHAKLRALLQRAFTPKAVAALEPRVRELSRGLLDRAIERGEMDLVED  
YTVPLPLLVISEMLGAPIEDQPRFKRWSVDVLDLSTTVAGTEEGARAIAAFTAVSAEMQA  
YLRGLIAERRAAPRDDLLTRLVDAEVDGERLGEDEILGFFQLLLIVAGHETTTNLIGNAVL  
CLLEDRAALARVRAEPALLPAAIEEVLRYRSPVQAMFRVTKRDVPMHGQVI PAGKPALVM  
IGSANRDPQQFRDPHRFDIARDPNPHVAFGHGLHFCLGAPLSRLEARIALSDLVTRLADL  
RLASDAPWEPRRAIHVLGPTRLPIRFAPGPRLDRSET

>CMC5\_001820|KEGG|**CYP102M3**||[Chondromyces crocatus]||ccro|DP

MSDLPAQSVIPQPPVRPLLGNAPDIDTDSFVMSMVQLSERLGPIYKLAFPGRSMLVLGNH  
ALAAEAGDEARFGKYVGGVLNELRALGGDGLFTADSNEENWGKAHRVLMFAFGPAAMRNY  
FDDMVEIADQMLVKWERFGPETDIDVADNMTRLTLDTIALCGFNRYRFNSFYQREMHPFVA  
SMVRALLEAGYRAKRLPLQNQLMFLSRRQFEADNAFMHGLTDELIEKRRKLDQREAPRDL  
LGLMLNAKDPLTGEGLDDKNIRYQLVTFLVAGHETTSGLLSFALHLLLDNPEVLEKAQAE  
VDRVLGDEAPRHEHLAQLVYVDQILRETLRLHPTAPIFAVHAREETTLGGRYPIHPEQAL  
MVLPSVHRDPAIWKHPERFMPERFAPGVRQEIPHRAWMPFGNGQRSCIGRAFSLQEATL  
VLAMLLQRFEITRPRRYRLVIKETLTMKPEGLVLRARARKPAVRGLAARPAPRAEPREDT  
KTKVRAPAHGTPLLLLLFGSNSGASEAFARRIASDGSARGYATHVAPLDDHAGKLPREGAV  
AIIITASYNQPPDNARQFCTWLDGLPEGALSGVRYAVFGCGNRDWAATYQNVPRRVDEQL  
ARAGATVLLPRGEGDARADFFGDFEQWYAPFWGTLGEALGVAPQEIDMSPLYEVEAVPSG  
SAELLAQNQLALATVIANRELVDLSSPFGRSKHHIEFTLPEGASYAAGDYLA VLPENHPD  
LVERAARRFGVRTDAAVVLRSTRGAMAASLPLGKPVSIQELLGRHVELSAPATRKDLERL  
AEKNPCPPHRAHLAALVGDLDRYKAEILDKRVSVDLLEITYPSCIVSFAEFLEMLPAMRV  
RQYSISSSPRLDPTRCTLTIVSVLSAPAYSGNGQFHGTCCSSYLARLRPGDRIPVAVRTPNV



PFHPPASNETPVVMICAGTGLAPFRGFLQERADRYAHGEAVGEAVLYFGCDHPDVDFIYR  
DELMQWERDGI DV RP A FF RK PD GE V TF V Q HR V W Q E R E R I R D L Y E Q G A I F F L C G D G Q R M A  
PAVRATLV R I R Q E A V G C T E E D A T A W L T S M E R E G R Y V P D V F A

>CMC5\_008210|KEGG|**CYP110R2**|[Chondromyces crocatus]|ccro|DP

MVALPPGPPLAPLHTLTFAGLDTPRFFKSCVSRYGDPFTVTLPAGKV VVTGHPDGIREIFT  
AEPSTFGALTQIPLLPVLGKSSMLLLEGQAHKRERRLLMPPFHGDRMRAYGTLMRDITLR  
LAATLPSHGAFTAMQLTQAISLEVIIQAVFGVKQPERVKAFQDTIASYFSSYTVPLMFVP  
PLRRSFHGVSPWDRFQQTAFHRFDILLDEEIIAARRRSSVEHEDILSLLLSARDEEGTPMTD  
EEIKDELRTMLIAGHETTAITMAWALYHVHRLPAVKARLLDELDALGPDPSPDALARASY  
LGAVCDEALRLDPVVILVPRRLKAPMTLRGVALPAGIGVMGAIVLAHHDPTIFSEPDQFK  
PERFLDRKYS PF E Y L P F G G G A R R C L G A A F A L Y E M K I A L G S L L L A H R F S L D E Q G P V K A V R R  
NVTFGPKTGVRRLRH D G V R P R P A S P A N P G L K G A G E G A A A

>CMC5\_010050|KEGG|**CYP107HV2**|[Chondromyces crocatus]|ccro|DP

MRIHVPDLCSAQHKSNPYPVYARLRAEAPVMRIVFGDKKPAWLLTRYDDVAAALKDPRLA  
KNAYRTLTPEEQAKAMPWTPGFLRPLTTSMLDQDPDHTLRLTLVHKAFTPRAVESLRER  
IEVLTAELIARARAGSIDLLEELAVPLPITVICEMLGVPEADRARFRAMSNRLIGIVTP  
TDMLLAMPSMWMMLMRYLRGLVESRRRSSGGNDMLAALIDAE E A G D R L G E E E L L S M V M L L L L  
AGHETTVNLIASGMLS L F D D H E A L E R L R S E P S L I K P A V E E L L R H T S P V D L A T E R Y T T E E V  
AFSGHVIPKGQRVFAVLGSANHDEQMFAQPERLQLDRDPNRHLAFGSGIHYCVGAPLARL  
EAQIAFTAILKELPGLRLAVPRASLRWKPATILRGLDQLPVHCTPAPTCSI P R A K P T A A A  
TAPLG

>CMC5\_013000|KEGG|**CYP264H1**|[Chondromyces crocatus]|ccro|DP

MNQQIDLFMDQNTRRNPYPVY A E L R R N R P V C Q V K G G I W V A A R H A D V M R I A K D V T S F S S S G  
FRVILSPPTIGPNPVAESILALDPNHTQLRALVSRAFTPRNIGRLEGRVTDIANEIGDR  
LRDMGEADLVAELAGPLPARIIAEILGLDPALHREFKRWGEHLAVITPATVDPLASAIRS  
SIGEMERYFKEVIAARRRNPREDIVTDLTRA E V D G V K L S D P Q I I S F L F L L S G G F E T T V N  
LIAHAMMILSARPQDHDRLRAEPHMIPAFVEEVRLRYEPPLQGLPRVCSADV V I G G Q F I P A

GSLVVGLIGSANRDESLYHDPDQFDMREQHGALAFGHGIHFCLGAALARLEGRLSLEAL  
LSRFRRLQQLPGEITYTCAISLRGPIAVPMRFIPG

>CMC5\_016940|KEGG|CYP183AH2|[Chondromyces crocatus]|ccro|DP

MDATSEIGIAPGGLPFLGHALQMLRRPLDFVASLRGQGDVVKIRVGAEWAYLVRHPDLVR  
QVLTDIFTFDKGGALFDKAKQIVGNGLSTCPASDHLRQRRLLQPAFSRERLENYAATMSE  
VTREMVDWQPGDIVDVHKAMGKLALSIAQTTLVSTSAVSASQETLKDSIQVLLDGIYWR  
MIAPFELLQKIPTRHNREFALAQQRMGAVVDQMAEEYRKSGVDRGDLLSALLAARDTDGT  
TGMTNAEIRDQVLTTLFLAGVESNGAAMAWAFYLLGRHPEVERQLHAEVDEVLGGRVPSFA  
DIPKLAVTHRIVQETLRLYPPIWMVSRRTTAAVKLGSCAIPAGAGILFSAYAMHHPDLF  
DEPERFDPDRWLPERARSLPREAMLPFSSGKRKCIGEAFSVIEATIAVATVARRFRLRSV  
RAGTIKGIPIRVTLIPGPLPMRVEGRKPKTMA

>CMC5\_016950|KEGG|CYP183AH1|[Chondromyces crocatus]|ccro|DP

MDTSSEIGVAPGGLPLLGHALQMLRHPLDFLTSLRGTGDVVKIRLGPEWAYLVRHPDLVK  
QVLADAYTFDKGGIVFDKARNILGNGLATCPAGDHLRQRRLLQPAFSRERLINYAVCMRD  
AARTRVESWHDGQVVEVDREMGSLALTVAATRTLFMSDSVAESPEEQASIQTILSGIYRR  
VITPFEVVLVRVPTRKNREFDQAMARMYSVIHQITEDYRTAGIDRGDLLSALLAARDEDGT  
TGLTNREIRDQILALFLAGIETTAAAMTWSFHLMGHHPEVEARLHAEVDTLGDKPPGFE  
DVPKLTHAHRVITEALRLYPPLWLLTRRTTAEVKLGHNLLQPGTAILFSSYAMHRDATYF  
EHPERFDPDRWLPERAKAVPRGAMIPFSAGKRKCLGDTFGMTEATIALATVARRWRLRPV  
PGKRISSIARITLAPGAVPMRVERRS

>CMC5\_019510|KEGG|CYP101P1|[Chondromyces crocatus]|ccro|DP

MNNELESERGVPAHVPVDLVVDLDVDFHPAGMEDDLHLAWRKVQVSGPDIFWTPRNGGHV  
ATRAEDIVVIQTDHERFSHRDVSIPTARPKGAPTALPVELDPPQHGayRGLISPAFSIRA  
VGAMEAKIREVTVALVEAIAPRGECEFVGDFAKELPVVVFLLDVLPRADRETLLPWAED  
LIRPKSAETAGLAYQNLARYVAGWVAQRTTERPGNDLISHIAGSRVHGRPITQDEAIRLCM  
LVLVGGLDTVASMLGFVARFMAQHPVHRRQLAEDPTLLPQAVEELIRRHGLVNTTRTITH  
DFVFKGVQLKEGERILVFNHLAGLDERTVEAPLTVDFLRPKPAPHAAFGNGPHRCPGSTL  
ARTELRIFFLEEWLKRIPEFGIKPGTKPVFASGAVNTVHELHLGWTARG

>CMC5\_023260|KEGG|CYP264G1|[Chondromyces crocatus]|ccro|DP

MSEVHLNLLSPEVAVDPFPFYAALRRDSPVCRVEPGGFVAVSRYEDAAAVVADPVRFSRR  
GVAPAMDPPWLQLEFNAGAHSMVVQDPPEHTRLRSMVNRAFGPALLAATEGPLRALAERL  
ADGLGGGDEVDFVSAFATPLVASVIGGVLGLDPTRHAQFKRWSVDLGSAGPVSQGPHEDE  
LVR SAYREMRHRCDEVIEARRREPGSDLMSALLQIRAGEQALTDRELHSFFHLLFIAGLE  
TTVHLIAKSVMR FADHPEEMARLRAEPAMIPRYLEEMLRYPDSVHFIFRQAPAEATLAGG  
TIPAGSFILVMLASANRDEARFPKADVDFMDRDTRGHLAFGHGPHTCLGLALARMEARIA  
LETLLTRFQRFERRPGPPEWMHTIIVRGLARLPVRAIPA

>CMC5\_023750|KEGG|**CYP263A3**|[Chondromyces crocatus]|ccro|DP

MTEMREEKRPPGPGPLTSLRYLANFRTGNMRHYEALFARYGDVVRLRAPGAEDFVLAFHP  
RDIGHILRTSSRNPYKKGKRYHELVPVLGWGLVNSEGLWRRQRRLVQPQFNHAGTLGFVP  
LIIAHT EALLRRWDARPDEFERDINDMDVTFGIAGEAFFGAALHAHTDTVRTAFKFAL  
SMALKRMYSLVNLPLSWPLPSHARFHHAMGQVHAVIDEIIDGYQAGDGSPDNVLVRLMKA  
VDPETGEAMDRAQLRDEIKTILMVGHETSSVTATWALYLLSQHREACERLTEEIDRVLSG  
RTPTVEDLDAMPYLGVMVFNECLRLMPSPVFILRSPLEDDVVGGRVEAGSTVAIVPWVTH  
RHPAFWNAPEKFMPERFAESRKSAAEKLAFIPFGAGQRICLGEFMGQLEGKIMVTMLLQR  
YRFQLIPGFDPRCRGFISLQPLNGMRMICRRREQTRSASVRRGGDGVRESVARPSRACPF  
SAGS

>CMC5\_027320|KEGG|**CYP109Q2**|[Chondromyces crocatus]|ccro|DP

METRVFAELDVTSPEFIRHPYPSYARARRASPLCRIQPNQFLGVSRYHDVVRVLHDSKRF  
SNSGYTASRPAQRQDLDIMPPMLVELDPPRHGKVRLIVRALSPTVAEFEPRLRKITDE  
LMASLHGESEFELLSALAIPLPMIVIAELLGVGSERRDDFRRWADDFAQAIGALETE  
KLQRSTQEFYHYFGERMEERRREPRGDLLSQLVHAEVDGERLSAEELLSVVTALLIGGNE  
TTTSLVANTIVTLTDHPEQLAEVQENLALIPALVEEALRFEPPAHCIFRQATTDVELEGA  
VIPRGTVVLPLLASANRDESQFPDPDRFDIHRDTKGHLAFGLDIHFCLGAALARMEGRVM  
LEALLSRTKNLKRAERDVAWTPSFIRAPQKLVLAQVD

>CMC5\_027330|KEGG|**CYP109Q3**|[Chondromyces crocatus]|ccro|DP

MSTGSADSAELDVTTTPDFIRHPYPGYARARRTASLCRILPNQFLGVSRYHDVVRVLHDSK  
RFSNSGYTASRATQQQNLDIMPPNLVELDPPRHGKLRGLIVRALSPRSVAEFEPWLRKIA  
DGLLES LHGASEFELLSTLAIPLPMIVIVEMLGVGTERRDEFRRWVDDFAAAHAIGSTLK  
REQLQRSTQAFCHYFSAQLEERRREPREDLLSQLVHAEVDGERVTAEELLSVVTALLIGG  
NETTTSLIANALVTLTDPDQLAEVQENPALIPAFIEEVLRFEPAHIVFRQTTTDDVELD  
GVTIPRGAMVLPMLASANDERQFPDPDRFDIHRDTKGHVAFGLDIHFCPGSALARLEAR  
VMLDALLSRAKNLRRPEREVAWAPSFFLRTPQKLVLCQAIA

>CMC5\_027340|KEGG|**CYP109Q4**|[Chondromyces crocatus]|ccro|DP

MFAELDVTSPEFIRHPYPGYARVRRSSPLCRIQPNQFLGVSRYHDVVRVLHDSKRFSNSA  
YTTSRPAQRQGLDTMPPMLLEMDPPRHGKVRALLVHAFSPRIVAEFEPRLRQLTDELMAT  
LHGAQEFELLSTLAVPLPILVIAELLGIGSERRDDFRWSDDFADALSIGATVETEQLQR  
STQEFYHYFGERMEERRREPRGDLLSLLVHAEVDGERLSARELLSAVTSLLVGGNETTTS  
LVANALVTLTDPHPEQLAEVQENLALIPALIEEVLRFEPPAHCLFRQTTTRDVEVAEMVIPG  
DTIVLPLLASANDASHFPDPERFDIHRDTRGHLAFGLNIHFCIGAALARMEARVMLEAL  
LSRTKNLKRAEREVAWSSSFLIRSPRRLVLRQAIG

>CMC5\_027350|KEGG|CYP109Q1|[Chondromyces crocatus]|ccro|DP

MIADFNITSPEVARNPYALFTEMRRASPVCLQPIQLLSVGRYHDVVRVLHDSKRFSNSG  
YNASVPKEMQENSTMPPSIVQVDPHRGQLRALVTKAFTPRTVAQLEPRIRELSRELIDG  
LRGQSTFELTSAITIPLPMIVIAELLGVGPERRGDFKRWSDDFVSTLALVEPGNRERVRR  
STEEFYGYFGQVLEERRKEPRDDLISRLLLADV DGSRLTPEEVLSFANTLLIGGNETTTS  
LIGNAMVALTDNPDQLAEVQENPALIPALIEEVLRFEPAQCIFRQTTTDDVDLDGVTIPR  
GAVVLPLLASANDHESRFPDPDRFDIHRDTKGQIAFGIDIHFCIGAALARLEARVLEEM  
LGRMKNIQRAEKDVAWTPSFFIRSPQSLPLRARID

>CMC5\_030120|KEGG|**CYP1011F1**|[Chondromyces crocatus]|ccro|DP

MSQRLHFDPLSSEFLADPYSLYARMRAEDPVHCNAMGSWLLTRHDDVAVLRDHRFGVHS  
MAANLRSGRFLGPGQKLDALADTVGQWLMFDNPPEHTRLRLVSRSTTGSVELLRAQV

EERVAACLDAAERERGELDVIHDLAVPLAVGTISSILGVPKDRARVLAWTEGLSHIVDPL  
RSLEEYLAAMEQVAEEFMEYFRALFRERRRNPEDDLVSALVAKEKDKGVTEVELLSMCTNL  
FTAGYKTTVNFIGNVLLLRNPAQCALLREAPEAVPRAMEELLRYDSPVQLITRLACEE  
VSLRGRTIPAGSMVFLALGGANRDPEQFANPDRLDLTRTEVRHVAFAPGMHHCGLGAMLAQ  
LEGQVAILGLVQRFEDLALRTEGVAMESDVIFRGPRSLPVSF DARTQALRRGRGG

>CMC5\_034440|KEGG|**CYP210B1**|[Chondromyces crocatus]|ccro|DP

MALPPGPRTPALVTTYHWIRRPQPFLTECRDTFGPAFTIRLPNLPPVAIFANPDDVKDIF  
TGDSDTMLAGRFNLSLRAFLGDHSLMLDGREHLRQRRLLLPPFHGERMTAYGRIMIDAA  
HDAIDRFPPFRSPFAVHGYMQEITLHVILRAVFGLEEGPRLDALAEAVTNLLEIAVWPPLL  
LPAMQRDLGPWSPWGRFLHYKRQTHGMLLDQIRRRRAEQATRPEGLEGDDVLTLLLQARD  
EEGQPLTDEELRDELMTLLVAGHETTATGLAWALHWILTTPGIEARLRRELADGHFTPER  
IARLELLDAVVRETLRLQPVLPFVGRILDKPVVGGWDLPAVGAVCSIYLAHKRPEVYT  
EPDRFNPDRFLGTFKFSPEFFFPFGGGIRRCIGMAFALHEMKMVLATVLARTILRPAHDRA  
IRAVRRNITLTPSDGCSVVLKRRAPRSTAAHAA

>CMC5\_036230|KEGG|CYP147L1|[Chondromyces crocatus]|ccro|DP

MPRNDLFQQATRPAHRADPYPLYAELRQKPVWLQDDGSYVVSTYREVSALLYDPRVSADP  
MKRSDLPPIIYTDPRMPRDQPSFIQLDEPKHGAMRRLTMKHFGPPRSAGRVSGMGARIGQI  
VDRLLDAHRDARQLDVVQDLSYPLPVMVICDLLGVPLDDEPLFREWSEVLTSSLDPDPAL  
QNDPAFLERIGSAAVGIRTYMTNLLQGHRRTPNDSMLSFAVNDPEAREHITDGEFLSIAI  
LMLIAGHETTIVNLISNATLTLLRHPDQLARLRDDPTLMPGAIEEFLRYEPPVQYRERTTL  
TDISIAGTTIPKGASVNLVLAANRDPLRFSEPDQFLLEREDNQHLSFGTGVHYCFGAPL  
ARVEAQIALNELLRRLDNPELTADPPPYRFNPALRGPSHLVVAFDGMRA

>CMC5\_041820|KEGG|CYP107HW1|[Chondromyces crocatus]|ccro|DP  
MSSPTIAEVMATPAFQLDPYPLYARLRDEQPLYRSPHGVAYLSRHADIEKALRDPRLSND  
RDRIIRAMQAQKNDTQLMTRLMRKLGRVMTNSDPYHARLRKLVGKAFNAGRIRDFRPQV  
QALTDDLLDAAQARGKGMDLIAALAYPLTSTVICALIGLPRDDQARFLAWFRQLEDPIGA  
GLSIGETEALVDTLYGALRALIHLREREPGDDFLSALVHAEEGGERLDEDELLSACFVLI  
GSGYETTMNLIANSVFTLLRHPDQLCALQEKPELLPQAIEEVLRYESPQLQVIRVVAEPV  
PIADGTLEEGEMVSLLLGAANRDPLRFPDAERFDITRTDSRHVSLGSGIHFCLGAPLARL  
EAAVAVGTVLRFRFSLRFEDSTPAWRPNPALRGLAHLNVAWS

>CMC5\_048430|KEGG|**CYP107HU1**|[Chondromyces crocatus]|ccro|DP

METRASQEQPRALRAVTEDEVSRRAQGGESIPVLNVGDPEFLGGAYEAYEALREKGPVVR

VAIPVSTGSDEEENPEGRTAFQEIIYGKEVFFLSRYAEVFEALRDERFSSCPHALKSAEEL  
AEEPVVAEELKPLRDSLLTTDAPDHTLRKLVQPSFTAQAMEALRPRIVQLAQGLLDQAE  
AAAAARGEKAGERRMDLVEAFAYPLPVTVISELLGIPEADRDRVRHWTEDLLINRGSRGL  
DKAALGKLQEFSTYLRLALFVERRDRPAEDLISRMVHAKEEGDALSEDELLSMVFLIYVAG  
HVTTVNLIGNGVFALLTHPEQLERFKASPSLSRGVVEETLRFWGPVDTVSGRIAKEDVEI  
AGTVIPKGSRVMCGLAAASHDPAFDHPEAFDITRPDAGRHVAFGRGIHLCLGAPLARLE  
GQIAFEVLFDRLFPSLRLSRPAEEMSWGCHKVLRGFDEIPVLF

>CMC5\_053220|KEGG|**CYP1007F1**|[Chondromyces crocatus]|ccro|DP

MANPSRDTALHALPGLRPLPLLGGPHLVRFRLDPLTTVRALHHEYGDVAVLCAEKPAMV  
CLFGGQNNRQVLTDAKLFVNYSKSLVETAPDSPLTRLTTSPLSLNGEMHKRRRRLMMPAF  
SKGRVEAYRDQMVEVTERYLARRPSGQIVDIASEMTELTMCIALQCLFGLDVSNEAEDLG  
RLGLQFLEGLTSLGVMALPFEIPGLPYRRFMQRCAQLEARISALIQRKRSSGEETQDLLS  
ILLRTHDEDGGALTDALLSESTGLFIAGHDTTANTLSWTLFLLSQHPEIYAALVDQLTS  
VLGGEAPTVEQLSQLPLLDVAVIKESMRLLPAAPLLFLRNSSEKAKLDGCTLPPDTTVILS  
PIISHHAPEIFPEPRRFRPDRWSTLRSPYDYL PFGAGPRTCIGASFAALELRIALAILL  
QRRRFTLSPDAVVSHHMRSILMGPRKGLRMVWTRQDGHFARPGGVRGTIHDLDVLS

>CMC5\_054910|KEGG|**CYP1224J1**|[Chondromyces crocatus]|ccro|DP

MKSSLPPGPRLPGFIQTSLYMSRPLHFLKRWSQQHGDFTTVHMTGSGDFVFITSPEDIRR  
VFTASIDVIYAGESNSLVRPFVGDSSVVVL DGEAHIRSRRQLLPFFQNERMQTYATIMRD  
VADASLDRWPVGRPFPLLSKMTEIAMELMLRNIFGLEDPREIATFLERFTSVLDEATSPM  
RVMA SFAGLDLYKLLPFLHVSKLKRQLDDSIYELIARRRAAPRDPTRQDVLT LILESKHE  
DGQAMTDREL RDALVTLIAAGYETSAIGMTFAVERLLAEPWALAKVHEELDRVLGQETIV  
AEHLPAL EYLDAAIKESLRLRPLVPLISRRTKAPFELS RHTLPAETMLIPALVLTHLRED  
LYPDPERFDPARFLGTPDPYAWLPFGGGARRCLGMAFAMYEMRMVLATVLRRASLELAS  
NRPVRMVNRHIMLAPSDGAPVVLKARRPKPQTKNSAAA

>CMC5\_054920|KEGG|CYP1286B1|[Chondromyces crocatus]|ccro|DP

MLPSGPTLPGRVQLFWWMFDPTSFMERCTREHGDFTTTRFTSYPPSVYVTDPEVIKQVFV  
ASAEDLSAGQANTGLMGFLFGERSVLSLDGAQHLSRRLVLPFFHNERLGRYGRMLMREIT  
DQHIDRWPIGKSFSVSKAMHELTFDVILRLLFGVHERAFYEPFSKLVAELVRQTTSPLFH

GLFAMLPPEWVMSMLTRGPTKVALGPLGERDLSLFMPGGAILQAKREIGALIHAEISLRR  
ASSQRGDDVLSMLLDARDENEGMSDDELHDQLITLFIAGHDTTANALSWAVHHLLQHRE  
VRGKLDDELSGVKGEAGWLQEVAEALAYLDAFIKETMRLTPVAPVILRILQRPLRFGQYD  
LPAGSYVCPCVYLTHRRADLWPEPERFLPERFIGRRVSPYEFFPFPGGGARRCLGAGFSMY  
EMKVILARLVARAALRPVGGGEVRPERRGIFLAPSSGVPVVLEGRREA

>CMC5\_063310|KEGG|**CYP107AM2**||[Chondromyces crocatus]|ccro|DP

MNTDRDEQVREYPFRAPGPLEPAEEWAPLRKGCPCVAHVRLPSGDQAVLLTRYDDVRQVLS  
DPRFTHNLSAEGAARTTANEAGGVFERQEASMLTDADRHQRWRRMIMKSFTVKHISAMQQ  
RIEAMADQLIDDMVKQGPPLDLASALGFPLPVWVICELLGIPGVDRDKLAYWSNTMLSVT  
QYGQQEIDAAQAEFKAYLTAHIVAKRANPGDDLSELLAAGDEGQGLSDMELLLTAQGGL  
VAGHETTSNMIGKMVAMLLSDRRRWEQLLADPSLVRTAVEEVLRFDANAGFGLPRFITED  
IEVAGQTLPRGTTVICAMASANRDERTFAEAEEMNLARSPNAHLTFGAGPHSCLGQTLAR  
TELQTVLRVLRLPTLALAVPTEALSRRAGLLVGGLEQVLVRW

>CMC5\_067690|KEGG|**CYP1496A1**||[Chondromyces crocatus]|ccro|DP

MDRRSSFVETSTSFSDPYPTLRLHDERPVYYHEPINAWFLVKYEHCEAVVRDPRFSSV  
RARELLHTLLPALRGTEGLDALVAQFSRLLWFVDPPRHTQLRSMVNRGFSASAIERMREK  
IRTVVQRALSRI GDGGEVDVVGDFADPIAIDVLCALFGLPEADSDVLRAWSDLGKVAGA  
SWADGTGGTDAKDASSAFAAYLKDLIADRIAHPGEDMVSRLFEGAGSAPEDIEGVIDQCY  
QVIGASYLPTCNQIGNAVLTLLQHPGELQRLRTTPELFRSAVEEILRFEPSTLTNNRIAS  
EDIELGGERILRGQLVFPVLAGANRDPVFPPEPERFDIGRRGARHLTFVGPHYCAGGAL  
VRMQLEEALQALLTFDTWELAGACDFRSGSLQDRGLATLPVRFSSRRPRSPRAAHGALESD  
LALLEV

>CMC5\_068540|KEGG|**CYP125E2**||[Chondromyces crocatus]|ccro|DP

MELADIRIADPDLYLTGVPHDRFERLRREAPVFWHEEEGGTGFWAITRHADAIQVISDAK  
RFSSARGGIWLEDYPPDDLRSNRDGLITLDPPRQTRYRGLVSKGFVPRLMQAIEPHAREI  
VTAMIDRVEERGSGDFVSELAGDLPLRIILQLLGIPLEDRAQVAAWAYQFLLAADKPKEE  
VEALVRDLVGYAARLAEERRASPRDDMLSVLMEGELDGEKLSSFEFGLFFSLLLSAGTVT  
THQLIAQGMLTLLERPETQRRLEEDPSLIPSAVEEMLRFVPSVGYMRRTATCDTEIQGQR  
IAEGDKVVAVLVSANRDEEVFPDAQTFDVTRSPNEHLSFGRGPHFCLGATLARLEARVAF  
EEILRRLPGMQLAGPVQRMRSNWLMLTHLPVRWSPSLRARP

>CMC5\_069130|KEGG|**CYP167B1**||[Chondromyces crocatus]|ccro|DP

MLDHTINHGQQPLKFCPFSTEYSANPYPTLERLREGSPLMFWEEGRCWVVS RHADVFGLL  
RDPFRFTTDRRTWEFAKPSEVEARCEPEYAEMSKHSLFSLDQAAHARVRKLVSPSFTPRAIE  
RLRPAIQHIVDEVLDAAAGKEILDVTRDFAEQIPIRAIGAMLNVPPERQAAFHRYADAMI  
RQLFPMLIRPEEVDGNFASIREGIAMIDDILEERRQEPREGDLMSSLLQAEEQGDRLSRR  
ELQALVSSLIVGGSETTVHLIGFMVLNLLRRPALMEQAKDEPELVKSILEEVLRFDNFTR  
LGLTRYARQDMDFNGSHIRKGQMMILLNLSALRDPSAFPLPDEFDPHREAVTSIAFGNGA  
HFCLGASLARLEGQVAVSTLLRRFPDMHLVGTPIFGPHPVIRKLDLSLKVALHASAR

>CMC5\_069160|KEGG|**CYP167B2**||[Chondromyces crocatus]|ccro|DP

MLEQNRENAPQKVDFDPFTNDYAKDPYPTLERLRANSPLLYWEEGRCWVASRYATVVVLL  
RDPFRFTTDRSVWEHAGHGQAAALCPEFVEMNRNGLFSLDQVAHARVRKLVSPSFTPRAIE  
RLRPAVQGIVDEVLDAAEGKDVLDVTRDFADQIPVRVIGALLNIPADRQAQFHHFADAVV  
RQLMPMLIKPSEIEENFAAIREGIAMIEGVIEERRQHPIEGDILTSLIQAEEQGDRLSKG  
ELVSLVSGLVVGGSETTVHLIGFMVLNLLQRPELLAEAKANPELIKGVLEEVLRFDNFGR  
LGITRYAKEDIELDGARIKKGQMVILMLNSAMRDAAAIIMPDTFDPHRDVTVTSLAFNGA  
HFCLGASLARLEGQIAVGTLLSRFPDLRQEKGA VFGPHPLIRKLDLSLQVRLRPAVS

>DB32\_001278|KEGG|**CYP110T1**||[Sandaracinus amylolyticus]|samy|DP

MKTTLP PGPRWTL PATLRLIRD PYATLRELRAEY GDLVTFPSPNGRVVLAMTPELVKPIF  
TASPDHFGAWAVGTTSVVLGPRSLIVSEGETHKRDRKLLTPAFHGARMRAYGDAMRTLAR  
RRFETAMQPGATVTMQDVTDDITMDVILRTVFGVGEGAAFD EGRALMGEIVRGMSPLLFF  
SKASHTPLFPPWRRFVRIRERFRAWLDARIAEARARGDEGDDVLAMMLAARYDDGSAMSD  
DDVAAQLVTLLFAGHETTAIALAWAMHWLGRHPDALALVRAEIASVGIDADPEVIAKLPY  
LSAVCDETLRLHPIVTENLRMLRKPLALGGYTIPPGIGVAAAIGAIHADPAIYPEPDAFR  
PERFLDRKYGA FEHLPFGGGHRRRCIGAAFAEYEMRLALAVLVDGWDVELVHRHERPVRRS  
VTLGPAHGVPVKVIGRRAGLRAAA

>DB32\_004988|KEGG|**CYP253M1**||[Sandaracinus amylolyticus]|samy|DP

MDARPYESMPTLPGGLPLLGHWP EIIHDVFGFLERAAERADVVRVRFVHERAVITHDPAM  
IQHVLQQSPRLYAKSRNYAGMKKVVGEGLLTSEGDFWKRQRKLAQPAFH HAKLRGITRTM  
ASATEDMLARWRTWEDGRPFDLHEEMMRVTLRIAGLSLFGADLDGESREIGAALGVILPW  
VNGIIQEPFRPPLWIPTRENALREALATLDRLVYRIVEERRRS DPEHQRDDLLSMLMAA  
TDDEGGGGMSDRQLRDEILTAVLAGHETTANALAWTGMLLARHPEIGARVEREASAVLGD  
RTPSVDDLSKLELCDRVVSESMRLYP PAWEFEREALVDDVAAGWRIPKGTVVM IAPWTLH



RSPRFWDEPARFDPDRFLPERSAGRPRYAYLPFGDGPRVCIGKAFAMMESKLLLAMMARE  
VRFELEPGAHVVRPEPSVTLRARGGVPMRFRRTAPAPFVDQTTSA

>DB32\_006288|KEGG|**CYP51B3**|[Sandaracinus amylolyticus]|samy|DP

MDETVRRAATRRRDEAPSGLLPAPRLSGGLPVVGHSVEFVRATIELLFRANRELGEVAAFS  
VFNREMAMFGPEAHEAVFRAPDAVLSPTEAYKIMTPVFGKDVVYDATPEKMAEQLKMLL  
PALKDRRMRTYGEAVVHETAASTREWGTSVGVDFVEFCRVLTNFTSSRCLLGKEFREGMS  
EEFARVYHDLEGGVTPLAYIDPHLPVPAFRKRDKARVMVEMITGIVDRRAHQRTGEDF  
LQTLMESNYADGRPLSEHEITGLLLAGIFAGHHTSSVTTAWTLLELLQNPTQLQRCVEEV  
DRVFGGGRPVSHAALRELT TIENAVKEALRLHPPLFMLVRVVKQDFTYKQFFIPKGTWIV  
VSPTVSHRIPTVFRDPDAFDPDRYLPGREEDKKDFAYIAFGGGRHKCLGNAFAILQIKAI  
LALLLGQFEFGLCGDAIAPSFQGLVIGPKEPCRVRYRRRAQPSVTMEMGTELAAAADAI  
AHELNGAKEVPQAVQQAAGCPAHAHVAATPSTSAGSSLRVKVDRLCQGHAVCATEA  
PEVFAVSPKDHKVMLKVARPPAELHDKVRKAAQYCPNHVIRIEETD

>DB32\_006357|KEGG|**CYP117D1**|[Sandaracinus amylolyticus]|samy|DP

MPVFRGAFPALGHLPALASDPLGLDRIAEREVGPLYWTDGTGFRWQLRCLSPESFDLFDKN  
VQTSSDYVGETLPDLFGRSVITLDGKPHRHARSVMGPAFTPGGLSAARVGSLFADVIERH  
VHEWIDRGVITTLASTRELVLALILRMLGVPERDLDVWRRDYEDHMLLALGVPLDLPGTP  
RRRGLTAKARLDERIGALVREARAGSDTTVLAQLSRAKDEHGEPLADAELLDNLRLLLILA  
GHETTATVIAWLIAYLAESPSSLERLQSEATDVPRAPGDLRAFRFAEALFREVLRLQPPV  
ARDARRAVVDLEIAGRRVPAGSIVAI SIELLSRSPRTYEDPDSFVPERWMGKTAPPTALE  
LVQFGAGPHFCLGYHVAWLEVVTQTSVILARALRARGARLALDGRFPRVRHLPLRHPDASS  
RVRFVRG

>DB32\_008533|KEGG|**CYP152Z1**|[Sandaracinus amylolyticus]|samy|DP

MGSIPRDPADIGSLALLREGYLFLPRRFERLDTDVLELRLMGLRFIALRGRDAAALFYDP  
TRFVRRGAVPMAVQRTLLGERGVQTLGDGMHAKRKKMFMSLMSRERIDALMGEMWKQWYA  
ALDRWQQREEIVLLEEAQDVMCRAACAWAGVPLEEREVRLRAEDFGAMVHSFATIGPRHF  
AGRIARARTERWMGGVIQIRIRRGELRPSPTQASYVVASHVDANDRPLDEHEASVELMNVL  
RPIVAIGTYVAFIGHALHAHPDHRAMLRAPVDETTRAERVEAFVQEVRRFYPTFPFLGAR  
VRESFEWRGYLFPKGRRVLLDVFGTDHRRLLFDDPDAFRPDRFLGWAGGPYDFIPQGGGR

YEGGHRCAGEWLTIEAMKVALTFLTRAVELRFAPQDAHIDLSRIPTLPRSGMILTDVRVAV  
ASDAPRPPVTRPDGAAARI

>DB32\_008796|KEGG|**CYP253J1**||[Sandaracinus amylolyticus]|samy|DP

MPLLGHLPVLRPDRLDYLMRVALETGDVVRFEFPHVTAHLVAHPDHVQQVLVDQHRFLTK  
QTRGYAKLRAFLGNGLVTSDEFWLRQRRIAQPAFHKKRIAGFADAMVRAAEDTVQRWAA  
PAREGTPIDVAAEMMRLTLRIAGETLLSTDPSDRANAVSTALTTVLHEANTRINTLWSPP  
AHWPTPRNRAYAAATRELDRIVLEIIEQRRRGREHRDILLQMLLEARDPETGAAMDDKQL  
RDEVMTMFLAGHETTANALAWTFVLLSRYPAVARALHEEACDVLGDRPATEADLPKLDLA  
RRVLNESMRLYPPVWIIIGRSPAEPVEIGGYDIPAKTIVFTSQWVTHRHPRFWDDPEGFDP  
DRWLPERAKTMHRHQFFPFAAGPRMCIGAGFAMMEGQLVLATLARRYRVDLLPGHPIVE  
PLITLRPKHGVTRATVHRID

>AKJ09\_00712|KEGG|**CYP1373B2**||[Labilithrix luteola]|llu|DP

MRAIAHKMDIMTNATSEAMPSSKSARKSVHAFPRLPGGHLLFGHLPDLKRDRAGLQFRVG  
REFPDVAVSLRFGVVRALMIGAPALANEVLSTKNASFIKAPGLTVFLRPVLGNGLLTS  
FHAQRKLIAPAFAHKRVASADTMAERARSFASGVRSEVLDVSDAMMRLTLEIVGKTL  
FDAEVSDDADEIGEAVTTAMECAIGQLESFLPLPPIVSPSPNVIRKAVARLDAIIYRLI  
RARRDQGGDRGDLLSMLLAAQDEGTAMNDRQVRDEAMTLFLAGHETTANALAWTLYLLA  
KNPEARAKVEAEVDTLGRAPSYEDLVRLPYTLAVLKEAMRLYPPAYILARRAVEDVSLGG  
HLVRRNTIVLVNVLGLHRRPDLFPEPERFVPERFLGDEEKKLPRCAYMPFGAGPRVCIGN  
HFALMEGHVLLATMLGRLRFELAGGADVELEPLVTTLRPRGLRMRVHVREAQN

>AKJ09\_02861|KEGG|**CYP210A2**||[Labilithrix luteola]|llu|DP

MLDNAGSRFGDIFTLRLPVGANGIVLVANPEAVKEIFALGPDEGHAGKANIVLKPFLGRH  
SLLVLDGAEHGRQRMMPAFHGERMQAYGQAMLDLAHDSVDGWPIGRSFVVHRPMQRIT  
TQVILRTVFGVAAGPQFEELADLLAKTLDAAAWPGLLFPFMQKDLGPLSPWGRWRRLRDR  
ASSILHEEIRQARSNHESRNDVLAMMVAARDESGRALSDDDEIHDELITLLVAGHETTATA  
LTWALRWIVPNRELTRLQDEIAGADDDPAKIDARLELLDATVKETLRLQPVIPIVGRVLQ  
EPMRVLGWDLPVTGTWLAPAIALIHQRASLYPNRRFDPDRFVGARPAWEPWGLPFGGGLRR  
CIGAAFAIYEMKMVLA AVLSRVSMRLVKNEVRTVRRSITLAPDEGLPIVALERRPRKARL  
RAA

>AKJ09\_06094|KEGG|**CYP1007B1**||[Labilithrix luteola]|llu|DP

MGTVFHLLIRYGRDPIGVTDRLFREYGPVIVSLVRGPVRIFSPAGCAMVFATGAGVNRQILT

EHDRYHMCALPGALYPSDEVLAEEAAAADKRWRATPERLQPIRRTLTGLFHVNGAEHRRHR  
RLLMPAFHKTRIDAYRDEMVALTTKVLDDEWRDDQVRDVLEDMTLTLRIATKTLFGEDAG  
EQGVRLARMFQEWLVTKFSPAMLLRFDAGPTVFRRWLDLTRDIDQCTLDIVRAKVARSKS  
QRDVAPDMLSSSLIAARDEDGSALDEDELVGHAGVIFAAGHETSTNALAWTLLLLSQHPDI  
ATDLVDELRGVLRGEAPTVEQLGSLPLLDVAVVKESLRILPPVPIHPRLVAKDSELEGHSL  
PAGTELFLSIYHMHDPDVFPRPQRFDP SRWSKIKPTVYEYNPFSAGPRMCIGASFATME  
IKIVLAMLLQRFRIELLPGARVDRRVTITMAPKNGLPMRIRRADDAWGGGPRDLRGNLRE  
LVDFS

>AKJ09\_06238|KEGG|**CYP1007G1**|[Labilithrix luteola]|llu|DP

MTMLRLHGFASVDIRGPRALPLVGTARRFISFLDDPVGVLALRRMGDVVAVVDRNPAIV  
CVFGPERNREVLSDPDFTFHNPEDDFTGPDGSAREKMRAMVVT SNGADHRRRRRLMMPAFH  
RSALDGYAEEIVTLTRSLVGAWPRGEVVS LDGLCRELSLCIAVQC FYGVDVKRGASVLGQ  
TMAEFVRLVTSPANILFPFDLPGT PYRRGVQIGEDLASRMLALVESKRQSGGQRRDAMGL  
LLDARDEHGNGLTAD EIVALAVELFIAGSETSSMALTWC LLLLDQHPRVLEALAAELSDV  
LGERDPSPADLPKLRLLD RVVKETLRVLP AAPILFLRSATRDTMLGGKAI PKGANLVVSP  
LATHHDASLYPD PDRFLPDRWKEIEPSTYAYFPFGAGPRMCAGALFASQSVRLMLAMILQ  
RFHPRTVDAGPIDRRVRANILNAQHGVHARLCPVRANAAPAAPVRGNIHELVKLESRGRS

>AKJ09\_10261|KEGG|**CYP1366A1**|[Labilithrix luteola]|llu|DP

MASNILVTDVSGIPSAGPLRRLPTKFALPLVGDSFAFLKDPAGFLATRAHELGP AFQINV  
FGHRTACFWGPEAFHFFLDERYFTRASASPAHVQKILDAKAVPFLDGARFKRRKALLMQA  
FTPDALDAYLGVLERVLT TRYARRWANLGTFAWVPEMTAFGMTVATSLFLGTNPDEDDPLL  
ARAFMTAFEGFLSVPINLPFTKYGRALQARDALRERIEHAIDEHEASTSTDALARLIDAR  
LPNGDKLSREEIRIETFHFV GAYLAVIGALSSSLAMFLGRRPDVKERLRQEIVDTLGTGPV  
TLRGLAGLEYLGRVTRESRRAEPVLPMTFFANVKEPCAYGGMRI PAGIKAIGCIGATLQD  
ERTFADPRSFD PDRWLPERATDRQHAAWVPHGGGGPFTHHRCAGERLADLMLSLSFSVVML  
RDYDWSFPRQDFSPTAAALFATPRAGLQVQLQRTSDRSRPRV

>A7982\_00879|KEGG|**CYP51B2**|[Minicystis rosea]|mrm|DP

MNLEPIVETLLRRKKAPPAGLREPPVLSGALPVVGHTVEFVRSTIGLLSRAQRELGEVAA  
IEIVGKRMVAVFGPDAHEAVFRAPDSQLNPSEAYKIMTPIFGKDVVYDAPPERMNEQLKM  
LLPALKDRRMRTYGEIVVSEVEQSIAGWGDSGEIDLVEYCRVLTNYTSSHCLLGREFRKG  
MTEEFAAVYHSLERGVTPIAYLNAHLPLPSFRERDRARARLEQMVTQIIQERRRAGREGE  
DFLQTLMDAKYKSGAPLTEHEITGMLVAAMFAGHHTSSVTTAWAIIELCNHPQYLRRVVE  
ELDNFAFAGGEEVGFASLRNIPHTERTVLEVLRLHPPLFMLVRVAMEDFTYKGFFIPKGTW

VLTSPTVAHQIPAVFRNPESFDPDRFAPGRDEDKRDFAYIPFGGGRHKCMGNAFALLQIK  
AILAILLRRYELELVNPHVPSDFHGLVVGPKPEPCRIRYRRRKAVSAGARPVAAAATAAP  
EKRYRVSVLDLDCQGHAAACVGEAPEVFRVDGLGKVRVIDTTPDASLSAKVEKAAQFCPTK  
TIKIEAI

>A7982\_00887|KEGG|**CYP263A2**|[Minicystis rosea]|mrm|DP

MSSIRDQKPPGPGPLGSLRYLANFRTGNMKHYEDLFARHGNVVRLRSPGVEDFILAFHPN  
DIAHVLRDNARNYPKGKRYHELVPVLGWGLVNSEGDLWRRQRRHVQPQFNHARTLEFVPI  
IVAHMEALLQRWDAEAGEFERDINDMDVTFGIAGEAFFGAALQAHTDTRQAFKFALS  
IALTRMYSVVNPPLSWPLPSHVRFRAMDRVHAVIDSIIDGYQQDAGDTDNLVRLMKSV  
DPETGAKMDRVQLRDEIKTILMVGHETSSVTATWALYLLAQHPEVYAKLTDEIDRVLGGR  
SPTAEDIESMPYLTVMVFNECLRLPSVPFILRSPSEDDTIGGYDVAAGSTIAIVPWVTHR  
HPAFWREPHVFMPERFVDYRRNVEERFAFIPFGAGQRICLGEFMGQLEGKIMVAMALQRY  
RLRLVPGFDPRCRGFISLQPLNGMRMLCRRRETVSASRAKPIAAAQSPAVAPERRGCPHA  
AGG

>A7982\_01273|KEGG|**CYP183AH3**|[Minicystis rosea]|mrm|DP

MTTQVPTTSCKLGIAPGRFPSIRHPLQMLTSPLEFLTSLRDAGDLVKVRLGTEWAYFVRH  
PDLLRQVLLGGPQTFDKGGPFFDKAQTVAGNGILTCPGKD HARQRRMMQPLFSRERLVRY  
AAVMHEEAERVAASWRPGQQLSVNKAMSALTAVTTTTLFSTEAPAGIVAEAQDALIVIF  
AGLYRRMIVPLDLVHDLPTPDNRRFDQAVTRLPEIIDQIIERYRRAGIDHGDLLSTLLAA  
RDPETGEGLSRELREQVMALFTAGTETTASALTSTFYLLDRHPDVERRLHAEADAVLHG  
RAARHEDLEALDYTTTRVFTETLRLYPPGWILTRRTNAAVDLGGHRVPAGATILFSPYALH  
RDPEFFTDPERFDPDRWLPDRAKAVPRFAMLPFSAGQRKCMGDTFAMNMATIIILATLAGR  
WRLRSGADTKVRSIAKMTLSVEATPMRVEARAVG

>A7982\_01853|KEGG|**CYP1373D1**|[Minicystis rosea]|mrm|DP

MDFEAMPIAPGAQGLLGHLPGFRKERLKTGLLSRQSTPMMRLDIPVAGIRALALNHPDV  
VQEALVEKVKHFKSDMLRFGLYDLAGEGLFTSNGELWRRQRKLMAPLFTPRALEAYATD  
MVACTRRTMEGWRDGEELPLSRETTRLTMGIAGKTLFDADTFSEADEIGHALTIALDWTG  
WIVGRPF AF AHVVLKRMAERLA AHATGNVREALTRAEQRFSRPVVHVGTGRGELSRAIAF  
LDEHVQRMIDRRRTAGTGRADLLSRLLEAHDEDDGAKMSDRQVRDEVLTFLVAGHETTA  
TGLAWTIYLLCKHPEVLAATVREVDVAGDDPSVSDLPRLDLCLRVFKEALRLYPVYVFG  
RDSKDPITLGGYDLPAPTNVLTSPWVLHHAARFWPDPERFDPDRFRPENEAARHRYAYLP  
FGAGPRICLGNHFAYMEAQLALATMLRRYTFELLAEDEPEPGATLRPKHGVRVRVRRRTH  
ARAFVGEAVME

>A7982\_01903|KEGG|**CYP1493A1**|[Minicystis rosea]|mrm|DP

MLEGFAAKWRDIGLLPAPSPKQKALVFVNAPELIAEVLIGKSACFEKSEFQRSVIGAPDR  
LGSGLLTSSNEDHRSQQRLIGEAFKPTRLQDYTQILAECARDLQASWADGAEIDVPAEAM  
RLATRTLGLSLFSTDMSPDGLDDRVDRAATVADSITSRYVGSARQQMRAESLENASAWL  
RTYLAGLIRSRVDAPRRGRDDLLDVLLSARASTAGVDPWDDEQLIYDIGTILLAGTENPK  
NSTAWALHLLAAHPEVRARLVAEVDGVLEGRLPPTHADLGRLTYTQQVYKEVLRLWPPGYA  
FSRTAVQPVTVGIDIPVGAEVLVSPYVLHRRADLYPNPTVFDPDFAPSTERRLHRMAY  
LPFGAGPRACIGGGFAMIQGPITLAVLAQSVLLDAVPGQHVEPEPMVTMRPSAFTMRVRR  
RPEAPEVR

>A7982\_01917|KEGG|CYP1500A1|[Minicystis rosea]|mrm|DP

MSTQTVDDFRGASTLPEPPLDRGPMIVGHLPEFMWARGPLLARLYRVNGPCFRMRMGLET  
PVVMAGPEMAEFTTKDAGRILHAGPSNMGFVREFGGTNMMLGADMDPHFHRNRNLMGQFT  
PGAVMKMVPRFAAVTVEMASAWSTGAPLDLLPCLKRLVTRQTGLVLAGRDAEAIYDDLRCR  
FFDLAVAVCFQAQVPRPVMKLLGYAEARERVLGFASSILDDRAAMPADARPGDLIDAILAA  
REPDGSPLDRGEQVGLVLAPFIGGLDVTSHTLSFLLYEVLTRPELQARCQREADAVFDGD  
TLDPARVRNLETIAATVSETLRVHPIAPVGQRVAAESFDFAGYRIQKGTKLLLGWSVGNQ  
VASRYAHPERFDVDRFLAPRNESTSGIGAFGFGPHKCIGAKLGEVQLAVTLAALLRKTTM  
RLDPPGARLRRTTSYTTLKPVGLRVRFERRAAPERAAS

>A7982\_02131|KEGG|**CYP1069G1**|[Minicystis rosea]|mrm|DP

MIARARPLPRRSRLTLPWTLHEEPPMSTATTIAFNHLAPPDLDHPYPLYERLRLEGPAVF  
NPIFDLWFVTRHEDVVAVVKDPAFSSADILKPLHPLSPEAVAALGEHSDVYPLLSGDPP  
MHTRVRNLVGKAFTPQRVAALEPRVRAIATELVAGVAPEGRADLIRRFAYPLPMRLTADM  
FGMRAADMDDVKRWCDEETLFLMAPLPPERQVECARVAAYRRYLRLDVEDHRAAPKGD  
VDALLDAQHEGEVPLTTEEIVGALCVLIFAGHQTTTNMIGTTLLHLLRRPGAWQTLRDDP  
GLIPGVVEEALRFDAFVQGMTRTVTEETDLGGVTLPKGAKVFVVFASANRDPACAAEPDT  
FDVRRAPPAQHLLAFGRGPHFCVGASLARLEGRVALEVLTERLPNARLVSDEALEYLPNLV  
HRGPSALPVAWDVP

>A7982\_02356|KEGG|**CYP1499A1**|[Minicystis rosea]|mrm|DP

MPAHDAIHSDLPSEVAAHRTTSPRALPRLGTLARFANRIRTFIDPLTASQRVLRAHGD  
LVAVDDRVICTDAPAIKAVLLDHRTFTKDFSQVYDVLSTSFWGSGFAVSNQDAWLKRRV  
VQAALSADHLRAYADVVTAGASRLDWTWRSGETRDVQADLMRLTLENTARVCAGSDDLAA

LPQIEAAVVAAMRWFENVELHAIGAETREEVGFKEAVARMNEQLAGVIQRRRSAPEPRKD  
VLSAMMSTPCEDGSLMTDDELRLDELVTMFRAGHRNTATTLAWAIGLLAAHPRAQEELAGE  
LARVLGGRAPALTDVPRLSYATRUVQETMRCYPLYPFILREARQGGTLAGRRIPASSKVI  
ISIWSMHRDGRFTDRPDFAFEPDRWAAPLDDAREIYAFLPFGGGPRRCPFKSYAMVEAVLL  
LASLAQRFRFRLAPGHRRLRPMNTANGLMPRDGMKIVLEAR

>A7982\_03064|KEGG|CYP1069D1|[Minicystis rosea]|mrm|DP

MLEDPRPFYARARREEPVFWSESLGLWVVTRHDDVCAVAKDAVRFSSMDSITPQVAPPPP  
EMLAELVKGFLLPSLVTSDPPAHTHQRALVTKALSLRRLATFEPILRGIADGLVDGFAA  
KGRAEIVEAFAIALPGNFIVDLLGLPREHLAQVNHWTDSAEVFAGHKPLDQLVVHARGF  
VEYQHYLAAAIEERQKSPREDALSDIVTGAAALNPPLGMPEIINMLLQVIFAGYETTAGL  
IAASALELARDPELFAAARRDPSIIPPIIEEVLRVASPIHAMYRTANEDVEIGGVRIQKG  
ERLQIAYISANHDERRFEDPLRFDIHRTTPHLAFGHGHIHFCIGAPLARLEGRIALEVLTQ  
RMPGLRLVPGQKLSYFPSATARRLDSLLEWP

>A7982\_04313|KEGG|**CYP1069F1**|[Minicystis rosea]|mrm|DP

MSRSTVIPFPNPFIPPSLDDPYPALEAARRQASVFFNPVLEMWVTRYADVIIVVRDPKTF  
ASHDTVRYPDLSPTRELLATGYEEMSILVNDDPPHHTMRGLVGKAFLPERIHAMTPH  
IRAIASITILDRIAGAGEADIVAELAYPLPAKVICAMSGVPDDDDMDKVKRWSDDWLLLSLG  
RLPEEKQLACAEGVLAFQRYTTEIVEARRRAPQDDITTSLVQARFEGGEMSTPEIAIFMM  
GLLLAGHETTTNLIASITLLHVLRDPRVKQQIVDDPDLIPLAIEETLRFDAPIQGMIRTVR  
AEATVGGVSLPPGERLFLSYAAANRDEEQFTDPNRWNPHRASERHLGFHGHGHIHFCIGAP  
LARLEARLVLEQLFERLPNLRLVPDQTLEYVPNLLHRGPRSLRLAWG

>A7982\_04652|KEGG|**CYP1373C1**|[Minicystis rosea]|mrm|DP

MRLEDIPLLSGANRLGHMEEIRDDEFNFHRLNRECGDIGRVHALGTPLIFANSPALLHE  
ILVEKAKSFVKSPGLRGPLRPLAGEGLFTSDGDLWKRQRKLMAPLFTHGMVAGYAPTMAH  
CAREAVAPLRTGEVVDVARLTTHIAMRIAGKTLFDSDTLDEADELGEALTVALRWANDQS  
SSLPYAAQLRLSGVFADVAEELPEPLRARAKTLAESLVEPIHWPGEQTRRIEHSTAVIER  
RVERMIAERRAAGLDRDRLTALLTAYDEDGGMSDKQVRDEIITLTVAGHETTATALAWS  
LYLLARHPEAYARARDEARQLGGRAATIEDLPKLGKLVFKESMRLYPPVYFFGRQASA  
DVRIGAYDLPRGAILISLYAMQRRPEVWPDPERFDPERFTPAAEEARPKLAWAPFSGGP  
RTCIGNHFALMEGPVILATILDRDLALTSNAEVLPPDDSATLRPKGGVAMRVTAHVHRD

>A7982\_04960|KEGG|CYP120G2|[Minicystis rosea]|mrm|DP

MTAPVSSVIYPQPSAGDIARLPLPPGSFGLPLLGETLEYLRSPPEFIGRRYRRHGNVFRT  
HLLGAPMVFLIGSDALRFSFAGENKYLQQRWPYSMRRLFAGEGTNLLVGEVHKERRRVLG  
PHFAFNAMRGFVPTMEAI AKKHLARWSEQSGVLTIVPAVRAMILEILSTLILSDEPVDQA  
RLGRLCHDWFAGLVVPIPLDLPGTAFGRALAAKREIGALLGAVVDRRMKLATQPDVLAG  
MLSVRDDANRPLSRQAIVDEIMNLMIAQGDTTISATGNLLLLLLAQHPDVLRRCREEQDGI  
AIEGGLTLDHLKSMPLYLNQTVQEAMRFITPVANATRATTQDVACAGYRI PKDWTVALCLA  
GTHHASTPWTDPERFDPDRFGPERAEHKREACPYVPFGGGPRVCLGQHLAMVEMSVIVAL  
MLRGYRWELLPDQDLRMNHIPVPSPKSGIKVRFSSR

>A7982\_05203|KEGG|CYP197H1|[Minicystis rosea]|mrm|DP

MYGVRNIIGFARDQLVLLRDLADRYGDVEMKVLGRPFFLISHPDDIEAVLVKHARIMLR  
DEYAVVLERVLGKLLTSDGDLWKRQRKLMSQAFVPKRIRSYGEAMVRVTDALRPWHDG  
QAINLHQEISRVTMEVVADVLFGSGIDHEDVRTVREAMEIVNEFLANSPEAVLKLPWVVP  
TPRNVATVRAVKQLDELIYRIIQKRRAGEPRDDLGLTLLAAQDDDGTKMSDAQLRDEAIT  
LFLAGHETTALALAHTFYLLSKHPDIERRLHAEIASVLGGRLPTADDVRALPYTERVLKE  
AMRLYPPAWTTGREVAEEVEIGGYVLPKGAQILTSQWVVHRDPRWFPNPEGFDPRFAPE  
RAKDLPRFAYFPFGGGPRICIGNHFAMMEATLLLAVIVQRFRIELLPGQQLSLKPSVTLR  
QAGPGLRVRVRERKAISPETSVREGIAIAAP

>A7982\_06089|KEGG|CYP1448B1|[Minicystis rosea]|mrm|DP

MDTTPDTTAPISAVANADLRAAAFRFFTDPAARADPIPLYRRLVREAPILELGPMLVSG  
FDELVGLSARHELSTPSVRGRALPMTPIPSLAGWLALTFPMRDGADHRLKGLAATAFS  
PARVAELRGRIEESIDALLAQATERGAMDVVADLALPLPVAISSAMLDVPAGDREQVHAW  
AMLVRRQLLRYDQSADEIARIEAEMEQAFAFVHALCDERRRRPGNDLLSDLSVAADAGRL  
SRDELVAFVLLLFVNGLTTLTSGLTMAVWELLQHPEERLAIAGNRAYAEAMFDEVRLHC  
PVRFSARVLVGDVQLDGHRLREGDVVTLCFGAANRDPRRFVDPDRFDPRRPRSRHLGFGH  
GAHYCLGAQLSLTTGACVLERIAKHGDRLTTRVTPATAAWSRSLAFTTLDTLPIEIAPPA  
RTT

>A7982\_06635|KEGG|**CYP1373C2**|[Minicystis rosea]|mrm|DP

MQLMNIDDLPVLSGADRLGHLRELAHERLSLFARFNRECGAIGRIFALRTPIVIVNAPEL  
IHGVLIGEAKSFIKPTAVLGPRPLVGDGLSTSDGDLWSTQRKLMAPLFTQAHIEAYADT  
MVEHAWSEARALREGQVVDAL EEMMRITMRVAGKTLFDAEVRDEADDLTAAITIALCWAD  
EQIGSIPWAVRRLYLASLLQALAERVASMRHAHTSTLTEAVVRPIHWPTVKRRRADAALAT  
IERRIEQMIADRRRAGLDRPDLLSLLLATHDEHGDRMSDKQVRDEIVTLFIAGHETTATA  
LTWSLYLLGRHPEAHARAQAEARALGDRRPRAADLPSLRYCLQVFKEAMRLYPPIYLFGR

QAANDVRIGDVDLPKGTIVLVSAAYALHRRPELWDPERFDPSRFEPQAEHRRHRLAYLPF  
SAGPRTCIGNHFAMMEGPLVLATILARVDFALGTS DPIEPRPFTTLRPWRVPLEVTAVRP

>A7982\_06764|KEGG|CYP1373B1|[Minicystis rosea]|mrm|DP

MSTPTSSIKTVPFFERLRFRRGNRVDSLLEMARHHGDVVRVPWFGGIVKANI ISSADMAH  
EVLVEQADAFVKGYGLSYFARPLLGNLLT SERDFHRRQRRMMAPAFVHKRIADYATVIG  
QRAEATQQGFRDGAVVDFSAAMMRMTLEIVGATLFGAEVGEEAEEIHEALTAAMEQATSA  
IRAIIPIPPSWPTPGNRRGHRAIARLDRTVYRLIEERRREGGDRGDFLSMLLLAQDEDDG  
SVMTDKQVRDEAMNIFLAGHETTANALAWGFYLLAQHPEIRERLEREVDAALEGRTPTLA  
DLPRLPFALQVFKEAMRLYPFAFVVARRATRDV IIGGHMAKNELAI INIIGMHHRPAYY  
VDPERFDPDRFAPEHEKAMNKRAFLPFGAGPRVCIGNHFAMLEGHLAVAALAQRVRLDLA  
PGSARVEPEPLITLRPRGGVPMIVRRRATVPHARPAAA

>A7982\_07556|KEGG|CYP167D1|[Minicystis rosea]|mrm|DP

MSMSESQRVPIFHYDPSAPAIIDVDPYPTFTRLREGAPVHYWPEARAYVVS RFEDVAMVF  
RDPRFSPDPVAAGQPSLDDALPD AIRGPLEQNLLRLGPKDHARVRRAVSPAFTPRAVERL  
RVEVERLVDAGLAPLSGQSEIDVAPFADFIPLRVIASMLAIPLAHEVTFRRFGEALIRRA  
DPRLDREAVAALAPVLAPGMDLIRRLVAERRQNLGDDLLSTLIRAEQAGDKLSEDEMLGL  
VSILITAGSETTVHFICFAVKSLLCVPERVAEVRADPGILRSAL EEVLRFDGFGKMGAFR  
YALEDLEIGGVHLPRGTRVIGFSGAAQRDPRAYPNADHYDPRREP AEILTFGSGMHFCLG  
AALARLEGETAIRALLDRYTD FRLLGEPVYATHPVMRKIASLRIGVTPRGRAS

>A7982\_10186|KEGG|CYP159A21|[Minicystis rosea]|mrm|DP

MTAPDILSPEFARDPYPLYRVMRDDHPLFFHEPTKSYVLSRYEDVERAFKDP AFSSKNYE  
WQLEPVHGRTILQMEGREHATHRNLLTPAFRGRDLQERFVPVIERNARELIDAFRARGEV  
DLVEAFATRFPINVIVEMLGLPREDHARFHAWYTSIMAFLSNLTGDP AVVERGLATREAL  
ASYMLPIIAERRRSPGADLLSTLCSAEIDGVRMTDDEIRAFVSLLLTAGGETTDKAVASL  
FKNLVENPDQLEAVRRDRSLIDAAFAETLRYSPPVHMIMRTPLQDVTMTGGVIPANSTVT  
CLIGANRDERRFASPDRFDIFRKDLDT ERAFSGGANHAAFALGRHFCVGAILAKTELQI  
ATGLLLDAMPDVRLDGGSPPEFGIFTRAPKSLKLRFTPAAS

>A7982\_10283|KEGG|**CYP110W1**|[Minicystis rosea]|mrm|DP

MALPPGPPLPASVQTALYLTKEPIEFLEGCHRRYGD LVTIETLLFGREVAVVDPEHV KQVF  
TSDPSDARAGEANAFLEPLVGARSVLLLDGQAHLRERRRMMPPFHGERMTAYARVMREIT



EQVVDTFPTDRPFALHPYMQRITLDIILRTVFGVEQGADLDALRASLIRLLDRQASTIGA  
LSTIPMFRRSLFGLSPWDGFLRDRDRADALIHAQIARRRADRSRSDVLSMLLEARDEEG  
RPM TDAELRDELMTLLAAGHETTAGMLCWA FELILGDGRVAARLRNEARDVGPEAAARLE  
YTDATVKEALRLHPVIPAVGRR LHAPMTLGKYVIPAGMLVVPSVYLTHRLASLYPEPTAF  
RPERFLDKKPDPIYAWYPFGGGVRRCLGMAFALYEMKIV IATILSRVRLRKAHPAPERTVI  
RAISFVPERGA EVVLEAKLGAGATAAAAA

>A7982\_11355|KEGG|**CYP253K1**|[Minicystis rosea]|mrm|DP

MPARRNDVPPGPPGYPLVGALPAFARDPLGFLSGATRRHGDMLFLGKVLGRGVYVLTRPD  
HLKYILQENNRNYIKGNGLAALKLVVGEGLVVAEGERWHRQRRLVQPAFHRQ RVAALVDQ  
MADVIEKAHARWREKTAQEPVPVLFEMMRLTQRVLLSTMFGVDIESKADSLCKAWDVVVA  
VLTERLLSPPIHLPISVPTPKHLRFRRAMQTLDDAIYGILRDPESADRGLLSMLRAARDE  
VTGEGMSDREL RDEVMTIFAGGFETS AVALSWWVHVLGTHPEVEAKLHAEIDEV LGDRRP  
RMEDLPKLR YTKMVVEETLRLYPSAWIFARMNLAADEIDGYPIPPRSLLFVVPYLTHRHL  
GFWPDPETFDPERFTPDRSASRPRFAYVPFGGGPRLCVGEAFAMTEMQTVVAMTARRFRF  
RPVPGREVRERGMFTLRARPDIIMSIEERRPAQRSIEEPTAAI

>A7982\_11494|KEGG|**CYP1069H1**|[Minicystis rosea]|mrm|DP

MTRAFSYFAPETQQDPYPQYAAARAEEPIFFCEDLGMWVATRHADVTA ILRDTDRFSSRL  
TTVAVKEPPPEVVAVMRRGFPTGSI IHLDPPEHTQVRRRMNAAFTAERVAAMEGAVTTL  
ANELVDAFEAEGRADLVRRFCGPLPVSVIADILGVS RADAGKFGQWANDAARLLMSGNLA  
TDEWVRAAESVVTMQHHLADLITARKSAPTDDL LTALVQTATDANGQLDMAKAVGYATAF  
VFAGHKTTTDL LGNALRLLLLHPEQLAALVRDSSLASAVVEETLRRDCPVPGTARVANVD  
VKIGDVTIPKDARILALLGSANHDENLFEASSKFDIGRTDVG DHLAFGRGVHFCLGAPLA  
RLQGRVALTVLTQRLRGLRFASEQPVKFWQVTMFRGPVSLDVAWDVAK

>A7982\_11629|KEGG|**CYP110S1**|[Minicystis rosea]|mrm|DP

MPSLPPGPRSTLISSFDLGLGPVHALARAHARYGDPFALPTFNGSLILTARPELIGEVLT  
QKDTELFEPFADDTLS PFFGTHSLLL IKGETHRRERRLLMP PFHGERMRAYGATMAEVAR  
EAVAALAPGQAFRAIDL GMEISLEVIVRAVFGVEGRAQVDEHLAALKATLDATSPFFLFG  
KAFQRAPFGLGPWARYEASSARVDRLLFDQIERVRPRAAERTDILSLMVAARYDDGSSMT  
PQQIRDELRTLLIAGHETTAITLAWAFELIHRHPHVRDRLLAELDAAGDAPDELAKLPYL  
TAIVDET LR LRPV VEMVARKLRPWT FAGYDLPTGATIAP AISLVHMRPDLYPDPLQFKP  
ERMLEKKPGPF EYMPFGGGNRRCLGAAMSHYESCIVLATALRGFRFALREPEPV PFARRT  
FTVGPKTGVRMEMLGVRREAALRNVA

>A7982\_12497|KEGG|CYP109P1|[Minicystis rosea]|mrm|DP

MADCDAPETRDLYRAMREKRPVFFDPRYRSFCVFRYDDVRTVLTDWERFSADYGAMAPGS  
ALDRIHQSGSMNASDPPRHQRLRGLVSRAFTPKSIAEMAPEIARTTHALLDELAPRGACEL  
MEDFAGVLPPLLIADILGIPRADHAHFRRLTLELLETFTDIVSGAPTSNAAQEAMEAYFS  
RIIEERRVDPRDDLTSRLIAAELDGERLDDREILTFMKLLL VAGNSTTSRLVGNAVVTLL  
EHPGELERLRADPKLVPSAVEEVLRFPPINTWFRIAAKDVTLGGEAIAARQQVVAFIGS  
ANRDEAYFTDPDRFDITRSPNPHIALSSGIHFCLGASLARLEAQIALQAILERLPDLALA  
GSEPLEVTKGLQSNGFVRLPVRYRAA

>A7982\_13464|KEGG|**CYP1007E1**|[Minicystis rosea]|mrm|DP

MTTRSPFASLAGPPMPFFGWRGNMVRFFQDTIGYMAPLARRYGDVVSFAAGSGAVLVR  
QPESRGAVFAFGPACHQAVLGQMSVFHSTRVPGPPESRSFARITSGLFNMNDDKHRQRR  
LMQPAFHRKRLDGYLDTMVRFTADVLDGFRVGETRDLVREMERLTLAVANKTLFGLEPTP  
GVISLGERIQEVIGRSMSPGALVPINLPGSPRRKLIEAADRVDAELRAVIATKRASGIDG  
DDVLSTLIATRDEAGDALADDELIGQTFILFLAGHDTTKSALAWTLFLLQHPRIFADVL  
DELRGVLRGAAPTVAQLGELPLLERVIKESLRLLPAPLTARLTMQPTALGGVELPAGTE  
VIISPYCLHRYPDLYTEAQRFLPDRAWASIERSPFEYAPFGAGARMCIGAAFAMMELKTVL  
SMFLQRFVGLAKGATIDRRTTVVMAPRYGMPMILRPPGAPAEPGVARGNVREMIDLPQ

>Hoch\_0067|KEGG|CYP107HZ1|[Haliangium ochraceum]|hoh|DP

MTDSRDAAKPATSAAGAPIFNPLDPAFLRNPYPVYRGLQDQAPVLLTPLGVYVTRYQDV  
QQVLRGPGMHHRFEDMARRRVGDKAKTSPAFRSLGQWILTGNPPDHTRIRGLMVKAFSAA  
RVESMRPRVQQLVDDLIDQMLAAADSAAPRADLVGALARPLPVTVICELLGIPREDWPRF  
TGDSYLPRFLVEPRPLSPSELDAVDSVVSEIGEYLGALCDSRRAAPQDDLISALVQASEG  
DDGKLTHEELVANLIMLFFAGHETTVNLIGNGMLALLGHPAERDKLIADSSLI PN AIDEM  
LRYDNSVQLAGVRCNEAAVTLSGVEVPAGSQLIPIIGAANHDPRAFDEPERFDVSRSFAN  
KPVSFGGGIHFCLGAQLARLEASIAVETLLRRLPDLRLAEGYEPAYFPSFVLRGLRSLEI  
AWS

>Hoch\_0804|KEGG|**CYP107JA1**|[Haliangium ochraceum]|hoh|DP

MTTIAHFNPQRADVWTDOPYPWYEQYRREDPVHWTLD AERGDAGVWYVFRHEDVLAARVNL  
SLSRRYRHASLMKKQLPSYMKPYSDMLGYWMVEMDAPDHTRLRSLVNKAFTPRMIAPLGH  
HIRASVNALLDRAAETRELDLIGEFAYPLTLRTIAGVLGAPPEDWPRFKQWSVVFAALEN  
RVPTIELYKQASAAMVEFAAYLRELFHRRRGEPLGDDIVSTLIQAEHDSVLEENEFIGT  
CMLLLFAGHETSTNLIGNAFYTLLKHPEQLALLRSEPARVPSVVEEVLRYESPVQTVSIG

HAIEPTAIGGREILPGQKVITAFGSANRDPEVFAEPDRFDITRDAKRHCAFGTGfHNCLG  
NQLARLEAQIALEALLERLPDLRLSGPEPQFKEGLMLRGLDQIAVTF

>Hoch\_0812 | KEGG | **CYP262C1** | [**Haliangium ochraceum**] | hoh | DP

MPKAKGYPLVGPLPNLIANSFDFFLKAQETYGDIYLLDVGLMQTVVCNHPRHIRHVYVTK  
GQSYRKAGALWEQMKLITGNGLAVSEGDTWRRQRTMLQPVFNKRRLRALGGLMSAAVSEE  
LPHWRETIGRERTMDVSPLFARTTMKMTIKLVFGTSLHQDEIDKVQPELQYAVRYLLPAM  
LADKVPHWIPIPGRRRYRQAIDTLGSVLMDVIARRRGESGEEGDLIAQLSRLVDESGQPM  
SQQQLLDETTLTFLAGYETTANAITWAAHFLSQHSEVMDKLHGELDAVLGGRIPTYEDLA  
QLTYTNRVFRETLRLCPPIWWNPRDIEEEDEIDGFYIPPGTTVTPVTYVIQRHPEFWEQP  
HVFDPDRTFPERSEGRDRIYAWAPFGYGRSCIGQEMAMMEGVFILAGILQHLQIEPIGR  
EAKIALLGTLRPKNGVHLRLRPRHGGV

>Hoch\_0813 | KEGG | **CYP1490A1** | [**Haliangium ochraceum**] | hoh | DP

MASVAGLPAAPLARSLAQLARDPLAFLTEGRERYGDIYRLGLGGMHVLLHHPRAHHV  
FREHYKNYGKGGALWEALRDYLGNGLLVTEGDLWLRQRLLQPLFKRTNIDMRMSSMYEI  
VTRVLDSWGEECAQTGSLDLVSACARLSMGVSTGSMFGSALTHTHALMEEVRVVVDSM  
VWNMLTRRIPQRLRPGYARYRKAMDHIHSALDGLIDHYQRSEDGDDGLLAMFSYIEDSAT  
GARMSRELMRDETLDLLLGAETTAQALAWTFYCILQHAEVERRLRAEIGAVLGARRPEL  
EDLKQLPYVVRVIREALRVYPGAWITRTTREDDEIDGHHIAAGTTVAVVTYAIHHHPAI  
WEQPERFERFLPEADAARERCAWIPFGSGPRVCMGMDFAMLELALAVILALQRYDIQR  
VTSGPIAPRLRTTLTPAEPLVRLHLRPGDA

>Hoch\_0814 | KEGG | CYP1504A1 | [**Haliangium ochraceum**] | hoh | DP

MKHAHPRLSPFEHTRQLLASPFQWLVDSQTRTGDIARLGIGHQSVLLSSHPEHADHVFR  
RHARRYARAGRFDALPGIFGRGLLMTADETWLRHRRLLQRFFRRDHLLSIAEPLLATIE  
DAVARHLGTVRGPRVLDVHPVLEAIVLECMITLVFGTRLSDADRAQVRSQITWLTRRVPQ  
ALLYSTLPASLARVVRNRYAENLLAFRRRIAAMAADCRREPSVSDDMLSELVWAASPGGA  
VLPDAEIEDEIINVFIAGLDTSVLGVTWAVALTATHPAEGEGISSEGRALGAHRRLRPEH  
IDALTRSLWVFQEGLRLYPPIWFSPLALADDEFGGCELAAGSTVIRMTHVLHRHPQFWA  
ESERFLPERFEPGRCPARHRAAWVPYGLGPHVCIGRHLAAILSQAIITILFARYRLELSG  
RMPRPLLRLASLAPQGGVPVRISPI

>Hoch\_1303 | KEGG | **CYP1489A2** | [**Haliangium ochraceum**] | hoh | DP

MLNDPLKLMTRAFEQHGRISYLPGINSYMISDPEFMRLILLDGENKFIKSPEVMSKIQVA

VGNGLSTLNGGEWKRRMSNSAFKPRNIAAFEPiFHEHLGEVMHQWEQRLGQRFDIAQE  
MKRLTLRIVLKGLLSLDVTD RADMLIEHL DVLQDYAVYILWSLFPLPENVPTRNRQYAE  
SKRVMDEEIYRIIEQRRRDGEAAGKGDLLATYMHAVDDAGSGMGNTQLRHELMNLF LGGH  
DTTANSIAFTLYLLSRNPGCRERLERELDEV LGGRLPTVEDIPKLHYLECVYNESLRLYP  
PSSAMSRRITLEPIEYEGYEIPAGADLLLSQWAMHRDPTLWENPDVFD PDRFTPERSANRH  
KFAFVPFGAGPRICIGAKLARMEASMILAALLQKYRFESPPGYK LKLQSRLFVN AVPGVF  
LRLQKREVSEKM

>Hoch\_2132|KEGG|CYP167C1|[Haliangium ochraceum]|hoh|DP

MTTTPTSSEFPASPETFDDLMSSEAFVRAPAETYAYLRDRAPAYYWPRHQAWMMTRYDDV  
DALLRDRPFSTDRRKWRYAHTLPHASSPELAALFENDLFTMHADDHRRVRKLVAPAFSPR  
SIARLEDEVRALVNSLLDDAKIDQRETFDVSQELAEPLPIRVISTMLDIPAEKDEDFRVW  
GTSVIRLALPYLPREVLMEAAEKATAGVSMVRAIIAERRQNPGE DILSKLISAQEEGERL  
SEDELMSLVAGLLVAGSETTVHLITFATYQFLTHEDSRRRLQDDPSLLGNALEESLRHDN  
FGKSGVTRYALEDVELHGKTIEKGMVILNLSALLDERVWPD AERFDVTRDPVSNITFG  
RGAHFCLGAHLARLEGRVAMQTLLERFPEMQLAGPPSFDYAH PFIRRIDKLEVRLRA

>Hoch\_2513|KEGG|CYP107HY1|[Haliangium ochraceum]|hoh|DP

MSTEQPIAPAPDSHTAPPTHDPATPAALFADAAFHHPYPRLARLREAAPVCAITMPDGA  
RAWLITRYDEALQVLKDARVTNEPPGGMHPGAMHSGTLERLMSPNMIFMDKADHRRRLGL  
LAKAFTPRFAEGLRPAVQQLADELDDAVAARGRMEFISDFAFPLPITVIADMLGLPQEDH  
QRLRDWSAVLFDSIGAHGDADREQQANEFAGYVKELIAHKRREPADDLISKLVQAEQDGE  
RLDEQELRAMIVLLIFAGHETTVNLLGNLLALFRQPEQLEALKRDPSLVPNAVEEMLRF  
CGPATMLAPRYAREDMQIGGV TIAKDELILLSVAGADRDPAAFSDPESIDLRRPTPQH LA  
FGQGMHICIGAPLARMEAQVAFTTLLKRFPELRLTVPVDEVVWRGNFALRGVEALPLAF

>Hoch\_2966|KEGG|CYP1486B2|[Haliangium ochraceum]|hoh|DP

MAATSKSQPSPEVAPFITQRVGDVARPLVGMPTTMDLSHLPGEEGPVATVRNTLGWIRSG  
VDHLLAQHERFGPVYRTGFAGYRVCAADPDMVLSIARDNQSWSTSLAWL TFFQGIDSKI  
NRAQLDSPLFLDFEPHRNARKVLQPAFGHSATSDYFDAALSLYEA AERWVARGQVSFKD  
AIRSLMVEVSTRIFLGEDDAPEFERALIEYWEGPLALVRDPRFSRKWRRSIRGHRR LCE  
LLRARIASRRASGGDDLFSRLCMTGTSDGLVDDDDGLVRLVIGVMSAAFATTSSGLSSMV  
YLLAEHPAWQQRMEELLALDSPRM TYADSQSLDVCMRVWKETMRLYPIAPY CARRALHD  
VDLGSYRIPAGTFVFGLISAVLRDSALWTQPERFD PDRFTEERAEDKRHKA AFLPFGIGV  
HTCTGMHLANA EVMFAFCHAMLTRCRFSLERP YRARHTYAPAGIVSGPVKLRVERL

>Hoch\_2967 | KEGG | CYP126B3 | [Haliangium ochraceum] | hoh | DP

MSVDSTNRPPASETAHSSPTAGALPAVLEGFDLSDQPRFADGFPYEVFARLRREAPVLFH  
PPGQTKDGEFVWLSRHADICEAAASPAFSSQGGGGRPHGGTHIDDARPELPGVLINMMD  
DPRHADLKDVLSPAVGRQALVALEGALRPYVNELVDGLLARGEAEFAADVGAAVGARAI  
S LLLGIPREDWPLFATWTSALMGFDDRETAEPSERSQKIHMDFGYGARLLVARRAAPQED  
LGSLLANAQLRRDSERPLTELERQTAFCLMVLAGTESTRNMIAGGVLALAHQAQWQALR  
DERSLLPSAIDEILRWTTPTPYNRRTATRDVTLGDAHIRAGDKVTLWWT  
SANRDESVFKD PMAFDVRRDPNPHLAFGYGTHCCFGDQLGKLEMRLVLDAMLERVAPLELSGPVVWAASNK  
HTVVMDFMPVAVRAR

>Hoch\_2973 | KEGG | CYP110U1 | [Haliangium ochraceum] | hoh | DP

MPETVDPSSAQTAGDLGRGPSSAFLTTLRYSIDPVSLYRTLARDYGDGHTVHMPMLLGDV  
VGAISPQSAQDILTADAASFDFSPESLAMVFRPRSVMMLSGQEHARERKLLMPPFSRQ  
VLANYAGTMQETALAYAAEVADGRPFVQMELAQRVLLRVVVRDVFVGTEDAELDELELRI  
RELFEASSPALIFFPPLRHRFGGVPYATWERADRRLTRLIHDLIARRRAEPRGDRVDVL  
SLMLSARYPDGSAPSDEVHLDELMAFFAGHAATATSIWVFWAHRHPEVLHKLRLDELA  
ALPWDAEPARYTELPLYLDAVCNETLRIYPPVADLYRKLRLVPLRVGGRTVPAGTGVAVLVT  
CIHARPELFPPEPLRFRPERFAERRYSPFEFLPYGAGARRCLGASFALQALQVAVATILRR  
WELALVRREQKAVRQGVGVGPKHGVPMRVVRSVLPERSAAQAGGRP

>Hoch\_3012 | KEGG | CYP262D1 | [Haliangium ochraceum] | hoh | DP

MNATTTQQPSAEKRFPIEKGLPLVGTLPQLLSSGTQLVERVSRKHGQITVLKAGPTQVY  
LITHPDHVKHVLQHSERGFSKGPMDPLRRVFGDGIGTSEGSEWLRSRRMAQPLFSTKNI  
DSLVGSMSEIVARHVARLAPLVGSGESVDMNVEMMRMVQDVLVATLFGVDVPAQQMTTIA  
DAIQRILSSSQLELLLLGMVLPHRLLQPMDLLVRRRPRQVLDEVIFDLIAQARASDSANF  
LSWFLRARDIDTGKGLDDQQLRNELISIIYVAGLETTMCSLLWLWYHLDQNPEIDGKMRAE  
VDAVMGASSITAACLEQLSYTKMVIQESMRRLPTIWMMPRYSREDNVIDGYKIPADSLIF  
LSPYATHRDPKFWERPEAFYPEHFTPERVAARPRYAYYPFGGGPHQCIGKYLAMTDQLLI  
VAMMVQRFRPRLLLGSTVDPRPSLFLRPRHAMRMTLERR

>Hoch\_4349 | KEGG | CYP155H1 | [Haliangium ochraceum] | hoh | DP

MSDASAAERPLQGRCPIDHDSATQQKTARAVELPEVPLDCDAEGVWHVRAFELVRELLRS  
ADTKQAGFNAESFAEQQIIINAPILFLDGNEHHVQRKQTARFFTPTRTVSEKHRSMMESFA  
DQLMREFRARKRIELSSVSMKMAVQVAAVIGLTDSELLPGLSGRLEAFFDDHEPPETLSP  
PRRMLAHARSNARTFAFFYLDVKPAIRARRKRPQDDVISHLLERQYSDVEILSECLTYGA

AGMVTTREFISVATWHLLEQPALLEQYLGGDESARQRLLEILRLEPVVTHLRRRATADI  
EIAADGRRYTIPEGALIDLHIGAANLDSAATGPCPLSVQPERELQVPRVGAEVLSFGDGA  
HRCPGAYIAIQETDIFLQRLRLRPLGLRFAQKPSVSWHPLVTGYELRNFWLELEG

>Hoch\_4741|KEGG|CYP1069B2|[Haliangium ochraceum]|hoh|DP

MSHDPTPSLDFDPFSGAQLDDPVPFLNQARATTPVFFSPPLGTWVVTTRYDHVVEILRDPA  
RFSSAASTTNVPGPPPPVLEVL SRGVAYAPNSVDLDPPRHTLFRRLINKAFTPRRIESM  
GPEIERFAHQLIDDFTDGQCELVAFAHPLPTLVIA SVLGVPRQDLGAFRRWSDEWVLL  
AQRGDMARLVQAAGEVVAFQRYVADLVAQRRRAPQDDLISAIVEAAAELEEAPTEAELVS  
LLMTVMFAGHETTTSLIVNTVKQLGLHPVERDRALADRGLIPAAISESLRLDPPVPSMYR  
TATEAVEIGGVALPAGAHIQLNFAAANRDPARFDEPERFDLERAEPERHLSFGRGIHYCV  
GAALALLEGRIAIAALYDRLPGLELVPEQRIRIRPSATVRIPERVLARWRAEV

>Hoch\_5488|KEGG|CYP110H3|[Haliangium ochraceum]|hoh|DP

MSTLPPGPSGKLRPTYRLLTKPRTAIPAWSARYGDPFTLKS LTGHVVVTGNPEGNRAIFS  
ADPDTFDTFAANALEPFVQGYSMLLLSGEVHRRHRKLLMP PFHGERMRAYA AVMAEVARR  
KLREAGAGPVRAIEVAQEISIDVIVRAIFGIHDDDRAAELCDAVRRAMGALHPALAFMPF  
LQRRFGGIGPYARMRRYLDYSDSLVAEQMKRARTQPGDDILSLMLAARDDEGQPMSEVEI  
LDELRTL VFAGHETTALLLAWGIDFIHRHPAVLKRLLAEIDQVDDSADDAERYAQLPYL  
DAVCKETLRLQPPVLEVLRTL RVPFELCGYTVPPGMGVAASVQLTHSRPDLYPEPEAFRP  
ERFLERKFSPFEYFPFGGGNRRRCIGAAFSSFEAKVVLATLLANWQVRLLDPEPPVPVRAS  
VVITPKGGVPIELTSRQRPN

>Hoch\_5532|KEGG|CYP107HV4|[Haliangium ochraceum]|hoh|DP

MIDIPDITRPRH KANPYPLYARLRAEAPAVRVIFGDKRPAWLITRHADVSAALKDPRLSK  
NPFVTL SAEEQRKQLPWIPAFARPLSKNMLDQDPD HGRLRRLVHKVFTPRMVAELRTRI  
EAITGDLLGAARARGRFDLLEDFA MPLPITVICEMLGVP EHERRRFRILSNRMVSIVTPS  
EMLRGLPAVWLLVRYLRGLIARRRREGGEDMLAVLVRAEEDGDRLDEDELLAMTLLLLVA  
GHETTMNLIASGTLALLDAPEEFARLAGEPTLMASAVEELLRFTSPVDVATERYASTELQ  
VGGQVIPRGERVFAVLGSANRDG SVFDHPDALMLDRSPNRHVAFGHGPHYCLGGPLARLE  
GEIAFAAICNELRGLALDVPRDSLRLWKRS PVLRLSLPVRCDGAPAYSLPRAA

>Hoch\_6014|KEGG|CYP1220C1|[Haliangium ochraceum]|hoh|DP

MHRLPGPRRLPLVGNLHQIEL SRLHLILEDWARRYGSAYRIGLGRPNLVLSDP ELIRAV

LRDRPEGFRNRNRTLETVLSEMGISGVFSAEGAAWRPQRRRLATAALSRSHIQGFFPTLRLG  
GERLLRRWQRAADQGAIVNILTDFQRFQAVDVMTSLSFGRDVNTIEDGGGGVHELLETVPF  
VLARRLNARVPIWRWLPSPDADRALDDALVELRAWLGAIIEARSELANPDGVTKNFLEA  
MLHARDEDGAADFDEAALFGNALTMLLAGEDTTASSLAWAVHELSDDAEVVARLRAELDGE  
ISSAVPKTLREVARLPYALAVAEETLRLRPAAPVLLMESNRDAVLGEDIAVPAGTRVLLL  
TRLAAISEAYVPEPQRFLPARWLDREASELLRRGVHLPFGSGPRLCPGRNLAFIEMQMM  
LAVLYRNFEVERIGPRSAVAENYGFTMTPHRLRVRLRRRAHAPAPHAAAAPRMEQR

>DN745\_16145|KEGG|**CYP197AB1**||[Bradymonas sediminis]||bsed|DP

MKLRLSIREKVAQKLDPSAGVARPPGPGALETLKTHLSFAGDPIGSLRKLTDKHGPTAVF  
RLGPYTNLYFTNPEDIEEVLLRKNDAFHKDTMLHELDAVLGQGLLTAEGDYWRGQRKLIS  
PTLRRKHIESYAEVMVSHTKDMMDWKTGEVRDFHADIMGVTLRIVVKTLFNLELEADYH  
EVGEQLEAALDYFFERNNTMWRFMPEPLPTPMRAKNKRAIEGLDRLIYELIESRRRQARA  
DTRAGVDEGNLLYRLLIAVDDEGNKMDNRQVRDEALTFLLAGHETTALAVTYAWHLMAA  
HPDAAARLREEVDAVL DGRAPTAEDAKKLPTTRALLNETLRLYPPAWIIGREAIEDVQIG  
DWTVPARGAQVLTQPQALVHRDPRWFDAPDTFRPERWLGLEKTLPRFAFFPFGGGPRVCIG  
NYFAIMEATLIIATMAQQIELENVSTEPLRIRPSVTQRPLSEIKMKVTRR

>FRD00\_08280|KEGG|**CYP110AU1**||[Persicimonas caeni]||pcay|DP

MPMPSPSPMSPREQTFGWMTRPYELLARCRQEVDVFTIDFRGHGQYVLFSDPEHIHQIL  
TGDPVAFHAANGLLEPFLGAHSLLLLEERHKRERRLMMPHFSRRQIHGWDQIEEVADR  
MIDGWRVGEEMPMRETAQSVALGLIDRLVFGLDGEANHDRHDALHRCFDEILSHPHFNIA  
LIGQFGERLAGSPAQQQLQESLAEMDRLVREEIAERRATGRRGDDIMSLMDAEYEDGES  
LSDDELRLDELVTLLATGHETTATSLAWAVHWVSHPPVLERLRAELATLGPDASPSQIAE  
LDYLLQSVVLETLRINPVVPIIARELQEPVQIAGYELPAGVTVAPVIYLLHRREDLYDEPG  
QFRPSRFLERDYKHNEFMPFGGGVRRCLGMHLALYELQILLARIATRVELRLCDEEEVRP  
VRRMVTIAPSGGVRFEVERVGA

>FRD00\_16705|KEGG|CYP197AB2|[Persicimonas caeni]|pcay|DP

MFGLKDGLNLVDRFKSGESAPARPPGPRGWQNLKVLVDFATDQIGCFRRITRRYGSASFF  
KLGTFDAYLFTDPEAIEEVLLTKSSSF EKDALTHELDVLLGKGLLTSEGQMWRHQRRLLIS  
PNLRRKQIAHYADVMVERTRQMLDDWEDGQVRPLHRDAMEVTLRIVVDTLNFNLEMDSDIH  
RVGQALDTAMEGFHEQAHTLWRFVPEPLPTPMRAKFEKALEEFDALIYKLIDQRRQDATE  
GDDLLYRLIAAVDDEGNQMTDGQLRDEVITLFLAGHETTALAIMYAWYLMSDHPWVMDKV  
HAEVDEVLGERVATADDVSELPYTEAVIQETMRLYPPAWTIGREAIEDVEIAGWTVTKGA  
QVLLPQSLVHRDRRWFDNPD LFRPERWLDGLEDRIPRFAYFPFGGGPRICIGNYFAMMEA

ILVVATMAQQVRLNVSRLQALRTQPSVTQRPATAIEMKVRRR

*Epsilonproteobacteria*

>A0Z60\_06705|KEGG|CYP172A|[Helicobacter winghamensis]hwi|EP  
MGVCPFHPKPYKTKASTFATFLFKRRSWLDGLYERSYKMMGRVKMPGFDLYVVNDPKEV  
RHVMVDDVKNFPSQLLHELLEPLLGMISFTTNDKMWKKQRELLRPSFEMTRISKVFNL  
RDATDDMMRKLASCQNGAVIEVDAIMTFVTADVIFRTIMSSKLDEAKGKLVLEAFGTVQE  
ETTKTALRTMFCFPKWLSRLLGENKRLKAASVIRKVLSDIIAPRYHNAQSDLGKYEDILS  
SLLQVVDAETHQRFTFEEILDQVSMLFLAGHETTASSLTWTLYILSIAPNEQEKAYKEII  
RVAGDGVFEIEHIKEMHYVASIFKEALRLYPPVGFFARETREDRKMMDKLVKKGSGVVVA  
PWLIHRHERFWKNPHEFDPTRHESKSNIKKDTYMPFGMGERICIGQGFAMQESVLILANI  
IRKYKLELEENFVPDIVGRLTIRSANGMRIKFIKRNQ

>Cj1411c|KEGG|CYP172A1|[Campylobacter jejuni subsp. jejuni NCTC 11168 = ATCC 700819]cje|EP

MSECPFFPKPYKNKASTLLTFLKRRSWLDGLYERSYKMQTGYVKMPNFDLYVINDTKEV  
KRMMVDEVREFPKSAFLHELLSPLLGESIFTTNGEVWKKQRELLRPSFEMTRINKVFNL  
SEAVADMMDRFSKYPNHAVIEVDEAMTFITADVIFRTIMSSKLDEEKGGKILNAFVTFQE  
QSVHTAMRRMFRFPKWLSYVLGDCKRAKAGDVIRQVLSDIIPRYDMADNAEFEDILGSL  
LLVVDADTNKRFSFEEILDQVAMLFLAGHETTASSLTWTLYLLSLYPKEQEKAYEEITQV  
LQGGVIEISHLRQFKYLTNIFKESLRLYPPVGFFAREAKKDTQVRDKLIKKGSGVVIAPW  
LIHRHEEFWTNPHGFNPSRFEGEYKKDAYLPFGVGERICIGQGFAMQEAILILANILKTY  
KLELEEGFVPDVVGRLTVRSANGMRIKFSKRKL



>BN148\_1411c|KEGG|CYP172A1|[Campylobacter jejuni subsp. jejuni NCTC 11168-BN148]cjb|EP

MSECPFFPKPYKNKASTLLTFLKRRSWLDGLYERSYKMQTGYVKMPNFDLYVINDTKEV  
KRMMVDEVREFPKSAFLHELLSPLLGESIFTTNGEVWKKQRELLRPSFEMTRINKVFNL  
SEAVADMMDRFSKYPNHAVIEVDEAMTFITADVIFRTIMSSKLDEEKGKKILNAFVTFQE  
QSVHTAMRRMFRFPKWLSYVLGDCRAKAGDVIRQVLSDI IKPRYDMADNAEFEDILGSL  
LLVVDADTNKRFSFEEILDQVAMLFLAGHETTASSLTWTLYLLSLYPKEQEKAYEEITQV  
LQGGVIEISHLRQFKYLTNIFKESLRLYPPVGFFAREAKKDTQVRDKLIKKGSGVVIAPW  
LIHRHEEFWTNPHGFNPSRFEGEYKKDAYLPFGVGERICIGQGFAMQEAILILANILKTY  
KLELEEGFVPDVVGRLTVRSANGMRIKFSKRKL

>CJJ81176\_1410|KEGG|CYP172A|[Campylobacter jejuni subsp. jejuni 81-176]cjj|EP

MSECPFFPKPYKNKASTLLTFLKRRSWLDGLYERSYKMQTGYVKMPNFDLYVINDTKEV  
KRMMVDEVREFPKSAFLHELLSPLLGESIFTTNGEVWKKQRELLRPSFEMTRINKVFNL  
SEAVADMMDRFSKYPNHAVIEVDEAMTFITADVIFRTIMSSKLNEEKGKKILNAFVTFQE  
QSVHTAMRRMFRFPKWLSYVLGDRKRAKAGDVIRQVLSDI IKPRYDMADNAEFEDILGSL  
LLVVDADTNKRFSFEEILDQVAMLFLAGHETTASSLTWTLYLLSLYPKEQEKAYEEITQV  
LQGGAIEISHLRQFKYLINIFKESLRLYPPVGFFAREAKKDTQVRDKLIKKGSGVVIAPW  
LIHRHEEFWTNPHGFNPSRFEGEYKKDAYLPFGVGERICIGQGFAMQEAILILANILKTY  
KLELEEGFVPDVVGRLTVRSANGMRIKFSKREL

>C8J\_1325|KEGG|CYP172A|[Campylobacter jejuni subsp. jejuni 81116]cju|EP

MSECPFFPKPYKNKASTLLTFLKRRSWLDGLYERSYKMQTGYVKMPNFDLYVINDTKEV  
KRMMVDEVREFPKSAFLHELLSPLLGESIFTTNGEVWKKQRELLRPSFEMTRINKVFNL  
SEAVADMMDRFSKYPNHAVIEVDEAMTFITADVIFRTIMSSKLDEEKGKKILNAFVTFQE  
QSVHTAMRRMFRFPKWLSYILGDRKRAKAGDVIRQVLSDI IKPRYDMADNAEFEDILGSL  
LLVVDADTNKRFSFEEILDQVAMLFLAGHETTASSLTWTLYLLSLYPKEQEKAYEEITQV  
LQGGAIEISHLRQFKYLTNIFKESLRLYPPVGFFAREAKKDTQVRDKLIKKGSGVVIAPW  
LIHRHEEFWTNPHGFNPSRFEGEYKKDAYLPFGVGERICIGQGFAMQEAILILANILKTY  
KLELEEDFVPDVVGRLTVRSANGMRIKFSKREL

>ICDCCJ07001\_1342|KEGG|CYP172A|[Campylobacter jejuni subsp. jejuni ICDCCJ07001]cjn|EP

MQTGYVKMPNFDLYVINDTKEVKRMMVDEVREFPKSAFLHELLSPLLGESIFTTNGEVWK  
KQRELLRPSFEMTRINKVFNLMSSEAVADMMDRFSKYPNHAIIEVDEAMTFITADVIFRTI  
MSSKLDEEKGGKILNAFVTFQEQSVHTAMRRMFRFPKWLSYVLGDRKRAKAGDVIRQVLS  
DIIKPRYDMADNAEFEDILGSLLLVVDADTNKRFSFEEILDQVAMLFLAGHETTASSLTW  
TLYLLSLYPKEQEKAYEEITQVLQGAIEISHLRQFKYLTNIFKESLRLYPPVGFFAREAK  
KDTQVRDKLIKKDSGVVIAPWLIHRHEEFWTNPHGFNPSRFEGEYKKDAYLPFGVGERI  
CIGQGFAMQEAILILANILKTYKLELEEGFVPDVVGRLTVRSANGMRIKFSKREL

>CJSA\_1342|KEGG|CYP172A|[Campylobacter jejuni subsp. jejuni IA3902]cji|EP

MSECPFFPKPYKNKASTLLTFLKRRSWLDGLYERSYKMQTGYVKMPNFDLYVINDTKEV  
KRMMVDEVREFPKSAFLHELLSPLLGESIFTTNGEVWKKQRELLRPSFEMTRINKVFNLMS  
SEAVADMMDRFSKYPNHAVIEVDEAMTFITADVIFRTIMSSKLDEEKGGKILNAFVTFQE  
QSVHTAMRRMFRFPKWLSYVLGDRKRAKAGDVIRQVLS  
DIIKPRYDMADNAEFEDILGSL  
LLVVDADTNKRFSFEEILDQVAMLFLAGHETTASSLTWTLYLLSLYPKEQEKAYEEITQV  
LQGAIEISHLRQFKYLTNIFKESLRLYPPVGFFAREAKKDTQVRDKLIKKSGSVVIAPW  
LIHRHEEFWTNPHGFNPSRFEGEYKKDAYLPFGVGERICIGQGFAMQEAILILANILKTY  
KLELEEGFVPDVVGRLTVRSANGMRIKFSKRKL

>CJM1\_1368|KEGG|CYP172A|[Campylobacter jejuni subsp. jejuni M1]cjm|EP

MSECPFFPKPYKNKASTLLTFLKRRSWLDGLYERSYKMQTGYVKMPNFDLYVINDTKEV  
KRMMVDEVREFPKSAFLHELLSPLLGESIFTTNGEVWKKQRELLRPSFEMTRINKVFNLMS  
SEAVADMMDRFSKYPNHAVIEVDEAMTFITADVIFRTIMSSKLDEGKGGKILNAFVTFQE  
QSVHTAMRRMFRFPKWLSYVLGDRKRTKAGDVIRQVLS  
DIIKPRYDMADNAEFEDILGSL  
LLVVDADTNKRFSFEEILDQVAMLFLAGHETTASSLTWTLYLLSLYPKEQEKAYEEITQV  
LQGAIEISHLRQFKYLTNIFKESLRLYPPVGFFAREAKKDTQVRDKLIKKSGSVVIAPW  
LIHRHEEFWTNPHGFNPSRFEGEYKKDAYLPFGVGERICIGQGFAMQEAILILANILKTY  
KLELEEGFVPDVVGRLTVRSANGMRIKFSKRKL

>CJS3\_1506|KEGG|CYP172A1|[Campylobacter jejuni subsp. jejuni S3]cjs|EP

MSECPFFPKPYKNKASTLLTFLKRRSWLDGLYERSYKMQTGYVKMPNFDLYVINDTKEV  
KRMMVDEVREFPKSAFLHELLSPLLGESIFTTNGEVWKKQRELLRPSFEMTRINKVFNL  
SEAVADMMDRFSKYPNHAVIEVDEAMTFITADVIFRTIMSSKLDEEKGKKILNAFVTFQE  
QSVHTAMRRMFRFPKWLSYVLGDCKRAKAGDVIRQVLSDI IKPRYDMADNAEFEDILGSL  
LLVVDADTNKRFSFEEILDQVAMLFLAGHETTASSLTWTLYLLSLYPKEQEKAYEEITQV  
LQGGVIEISHLRQFKYL TNIFKESLRLYPPVGFFAREAKKDTQVRDKLIKKGSGVVIAPW  
LIHRHEEFWTNPHGFNPSRFEGEYKKDAYLPFGVGERICIGQGFAMQEAILILANILKTY  
KLELEEGFVPDVVGRLTVRSANGMRIKFSKRKL

>A911\_06865|KEGG|CYP172A|[Campylobacter jejuni subsp. jejuni PT14]cjp|EP

MSECPFFPKPYKNKASTLLTFLKRRSWLDGLYERSYKMQTGYVKMPNFDLYVINDTKEV  
KRMMVDEVREFPKSAFLHELLSPLLGESIFTTNGEVWKKQRELLRPSFEMTRINKVFNL  
SEAVADMMDRFSKYPNHAVIEVDEAMTFITADVIFRTIMSSKLDEEKGKKILNAFVTFQE  
QSVHTAMRRMFRFPKWLSYVLGDRKRAKAGDVIRQVLSDI IKPRYDMADNAEFEDILGSL  
LLVVDADTNKRFSFEEILDQVAMLFLAGHETTASSLTWTLYLLSLYPKEQEKAYEEITQV  
LQGAIEISHLRQFKYL TNIFKESLRLYPPVGFFAREAKKDTQVRDKLIKKGSGVVIAPW  
LIHRHEEFWTNPHGFNPSRFEGEYKKDAYLPFGVGERICIGQGFAMQEAILILANILKTY  
KLELEEGFVPDVVGRLTVRSANGMRIKFSKRKL

>N564\_01408|KEGG|CYP172A1|[Campylobacter jejuni subsp. jejuni 00-2426]cjej|EP

MSECPFFPKPYKNKASTLLTFLKRRSWLDGLYERSYKMQTGYVKMPNFDLYVINDTKEV  
KRMMVDEVREFPKSAFLHELLSPLLGESIFTTNGEVWKKQRELLRPSFEMTRINKVFNL  
SEAVADMMDRFSKYPNHAVIEVDEAMTFITADVIFRTIMSSKLDEEKGKKILNAFVTFQE  
QSVHTAMRRMFRFPKWLSYVLGDCKRAKAGDVIRQVLSDI IKPRYDMADNAEFEDILGSL  
LLVVDADTNKRFSFEEILDQVAMLFLAGHETTASSLTWTLYLLSLYPKEQEKAYEEITQV

LQGGVIEISHLRQFKYLTNIFKESLRLYPPVGFFAREAKKDTQVRDKLIKKGSGVVIAPW  
LIHRHEEFWTNPHGFNPSRFEGEYKKDAYLPFGVGERICIGQGFAMQEAILILANILKTY  
KLELEEGFVPDVVGRLTVRSANGMRIKFSKRKL

>N565\_01448|KEGG|CYP172A1|[Campylobacter jejuni subsp. jejuni 00-2538]cjeu|EP

MSECPFFPKPYKNKASTLLTFLKRRSWLDGLYERSYKMQTGYVKMPNFDLYVINDTKEV  
KRMMVDEVREFPKSAFLHELLSPLLGESIFTTNGEVWKKQRELLRPSFEMTRINKVFNL  
SEAVADMMDRFSKYPNHAVIEVDEAMTFITADVIFRTIMSSKLDEEKGKKILNAFVTFQE  
QSVHTAMRRMFRFPKWLSYVLGDCKRAKAGDVIRQVLSDI IKPRYDMADNAEFEDILGSL  
LLVVDADTNKRFSFEEILDQVAMLFLAGHETTASSLTWTLYLLSLYPKEQEKAYEEITQV  
LQGGVIEISHLRQFKYLTNIFKESLRLYPPVGFFAREAKKDTQVRDKLIKKGSGVVIAPW  
LIHRHEEFWTNPHGFNPSRFEGEYKKDAYLPFGVGERICIGQGFAMQEAILILANILKTY  
KLELEEGFVPDVVGRLTVRSANGMRIKFSKRKL

>N755\_01445|KEGG|CYP172A1|[Campylobacter jejuni subsp. jejuni 00-2544]cjen|EP

MSECPFFPKPYKNKASTLLTFLKRRSWLDGLYERSYKMQTGYVKMPNFDLYVINDTKEV  
KRMMVDEVREFPKSAFLHELLSPLLGESIFTTNGEVWKKQRELLRPSFEMTRINKVFNL  
SEAVADMMDRFSKYPNHAVIEVDEAMTFITADVIFRTIMSSKLDEEKGKKILNAFVTFQE  
QSVHTAMRRMFRFPKWLSYVLGDCKRAKAGDVIRQVLSDI IKPRYDMADNAEFEDILGSL  
LLVVDADTNKRFSFEEILDQVAMLFLAGHETTASSLTWTLYLLSLYPKEQEKAYEEITQV  
LQGGVIEISHLRQFKYLTNIFKESLRLYPPVGFFAREAKKDTQVRDKLIKKGSGVVIAPW  
LIHRHEEFWTNPHGFNPSRFEGEYKKDAYLPFGVGERICIGQGFAMQEAILILANILKTY  
KLELEEGFVPDVVGRLTVRSANGMRIKFSKRKL

>N135\_01500|KEGG|CYP172A1|[Campylobacter jejuni subsp. jejuni 00-2425]cjei|EP

MSECPFFPKPYKNKASTLLTFLKRRSWLDGLYERSYKMQTGYVKMPNFDLYVINDTKEV  
KRMMVDEVREFPKSAFLHELLSPLLGESIFTTNGEVWKKQRELLRPSFEMTRINKVFNL  
SEAVADMMDRFSKYPNHAVIEVDEAMTFITADVIFRTIMSSKLDEEKGKKILNAFVTFQE

QSVHTAMRRMFRRFPKWLSYVLGDCKRAKAGDVIRQVLSDI IKPRYDMADNAEFEDILGSL  
LLVVDADTNKRFSFEEILDQVAMLFLAGHETTASSLTWTLYLLSLYPKEQEKAYEEITQV  
LQGGVIEISHLRQFKYLTNIFKESLRLYPPVGFFAREAKKDTQVRDKLIKKGSGVVIAPW  
LIHRHEEFWTNPHGFNPSRFEGEYKKDAYLPFGVGERICIGQGFAMQEAILILANILKTY  
KLELEEGFVPDVVGRLTVRSANGMRIKFSKRKL

>H730\_08010|KEGG|CYP172A1|[Campylobacter jejuni subsp. jejuni R14]cjer|EP

MSECPFFPKPYKNKASTLLTFLKRRSWLDGLYERSYKMQTGYVKMPNFDLYVINDTKEV  
KRMMVDEVREFPKSAFLHELLSPLLGESIFTTNGEVWKKQRELLRPSFEMTRINKVFNL  
SEAVADMMDRFSKYPNHAVIEVDEAMTFITADVIFRTIMSSKLDEEKGKKILNAFVTFQE  
QSVHTAMRRMFRRFPKWLSYVLGDCKRAKAGDVIRQVLSDI IKPRYDMADNAEFEDILGSL  
LLVVDADTNKRFSFEEILDQVAMLFLAGHETTASSLTWTLYLLSLYPKEQEKAYEEITQV  
LQGGVIEISHLRQFKYLTNIFKESLRLYPPVGFFAREAKKDTQVRDKLIKKGSGVVIAPW  
LIHRHEEFWTNPHGFNPSRFEGEYKKDAYLPFGVGERICIGQGFAMQEAILILANILKTY  
KLELEEGFVPDVVGRLTVRSANGMRIKFSKRKL

>MTVDSCj20\_1387|KEGG|CYP172A|[Campylobacter jejuni subsp. jejuni MTVDSCj20]cjv|EP

MSECPFFPKPYKNKASTLLTFLKRRSWLDGLYERSYKMQTGYVKMPNFDLYVINDTKEV  
KRMMVDEVREFPKSAFLHELLSPLLGESIFTTNGEVWKKQRELLRPSFEMTRINKVFNL  
SEAVADMMDRFSKYPNHAVIEVDEAMTFITADVIFRTIMSSKLDEGKGKKILNAFVTFQE  
QSVHTAMRRMFRRFPKWLSYVLGDRKRTKAGDVIRQVLSDI IKPRYDMADNAEFEDILGSL  
LLVVDADTNKRFSFEEILDQVAMLFLAGHETTASSLTWTLYLLSLYPKEQEKAYEEITQV  
LQGGAIEISHLRQFKYLTNIFKESLRLYPPVGFFAREAKKDTQVRDKLIKKGSGVVIAPW  
LIHRHEEFWTNPHGFNPSRFEGEYKKDAYLPFGVGERICIGQGFAMQEAILILANILKTY  
KLELEEGFVPDVVGRLTVRSANGMRIKFSKRKL

>PJ17\_07425|KEGG|CYP172A|[Campylobacter jejuni subsp. jejuni 00-1597]cj1|EP

MSECPFFPKPYKNKASTLLTFLKRRSWLDGLYERSYKMQTGYVKMPNFDLYVINDTKEV

KRMMVDKVVREFPKSAFLHELLSPLLGESIFTTNGEVWKKQRELLRPSFEMTRINKVFNL  
SEAVADMMDRFGKYPNHAVIEVDEAMTFITADVIFRTIMSSKLDEGKGKKILNAFVTFQE  
QSVHTAMRRMFRFPKWLSYVLGDRKRAKAGDVIRQVLSDI IKPRYDMADNAEFEDILGSL  
LLVVDADTNKRFSFEEILDQVAMLFLAGHETTASSLTWTLYLLSLYPKEQEKAYEEITQV  
LQGGVVEISHLRQFKYL TNIFKESLRLYPPVGFFAREAKKDTQVRDKLIKKSGVVIAPW  
LIHRHEEFWTNPHGFNPSRFEGEYKKDAYLPFGVGERICIGQGFAMQEAILILANILKTY  
KLELEEGFVPDVVGRLTVRSANGMRIKFSKRKL

>PJ18\_07210|KEGG|CYP172A|[Campylobacter jejuni subsp. jejuni 00-6200]cjw|EP

MSECPFFPKPYKNKASTLLTFLKRRSWLDGLYERSYKMQTGYVKMPNFDLYVINDTKEV  
KRMMVDEVREFPKSAFLHELLSPLLGESIFTTNGEVWKKQRELLRPSFEMTRINKVFNL  
SEAVADMMDRFSKYPNHAIIEVDEAMTFITADVIFRTIMSSKLDEEKGGKILNAFVTFQE  
QSVHTAMRRMFRFPKWLSYVLGDRKRAKAGDVIRQVLSDI IKLRYDMADNAEFEDILGSL  
LLVVDADTNKRFSFEEILDQVAMLFLAGHETTASSLTWTLYLLSLYPKEQEKAYEEITQV  
LQGGAIEISHLRQFKYL TNIFKESLRLYPPVGFFAREAKKDTQVRDKLIKKDSGVVIAPW  
LIHRHEEFWTNPHGFNPSRFEGEYKKDAYLPFGVGERICIGQGFAMQEAILILANILKTY  
KLELEEGFVPDVVGRLTVRSANGMRIKFSKREL

>cjr:CJE1598|KEGG|CYP172A1|[Campylobacter jejuni RM1221]cjr|EP

MSECPFFPKPYKNKASTLLTFLKRRSWLDGLYERSYKMQTGYVKMPNFDLYVINDTKEV  
KRMMVDEVREFPKSAFLHELLSPLLGESIFTTNGEVWKKQRELLRPSFEMTRINKVFNL  
SEAVADMMDRFSKYPNHAVIEVDEAMTFITADVIFRTIMSSKLDEEKGGKILNAFVTFQE  
QSVHTAMRRMFRFPKWLSYVLGDCKRAKAGDVIRQVLSDI IKPRYDMADNAEFEDILGSL  
LLVVDADTNKRFSFEEILDQVAMLFLAGHETTASSLTWTLYLLSLYPKEQEKAYEEITQV  
LQGGVIEISHLRQFKYL TNIFKESLRLYPPVGFFAREAKKDTQVRDKLIKKSGVVIAPW  
LIHRHEEFWTNPHGFNPSRFEGEYKKDAYLPFGVGERICIGQGFAMQEAILILANILKTY  
KLELEEGFVPDVVGRLTVRSANGMRIKFSKRKL

>JJD26997\_1744|KEGG|CYP172A|[Campylobacter jejuni subsp. doylei 269.97]cjd|EP

MSECPFFPKPHKNKASTLLTFLLKRRSWLDGLYERSYKMQTGYVKMPNFDLYVINDTKEV  
KRMMVDEVREFPKSAFLHELLSPLLGESIFTTNGEVWKKQRELLRPSFEMTRINKVFNL  
SEAVADMMDRFSKYPNHAIIEVDEAMTFITADVIFRTIMSSKLDEEKGKKILNAFVTFQE  
QSVHTAMRRMFRFPKWLSYVLGDRKRAKAGDVIRQVLSNIIKPRYDMADNAEFEDILGSL  
LLVVDADTNKRFSFEEILDQVAMLFLAGHETTASSLTWTLYLLSLYPKEQEKAYEEITQI  
LQGGAIEISHLRQFKYL TNIFKESLRLYPPVGFFAREAKKDTQVRDKLIKKGSGVVIAPW  
LIHRHEEFWTNPHGFNPSRFEGEYKKDAYLPFGVGERICIGQGFMQEAILILANILKTY  
KLELEEGFVPDVVGRLTVRSANGMRIKFSKREL

>M635\_02730|KEGG|CYP172A1|[Campylobacter jejuni 32488]cjz|EP

MSECPFFPKPYKNKASTLLTFLLKRRSWLDGLYERSYKMQTGYVKMPNFDLYVINDTKEV  
KRMMVDEVREFPKSAFLHELLSPLLGESIFTTNGEVWKKQRELLRPSFEMTRINKVFNL  
SEAVADMMDRFSKYPNHAVIEVDEAMTFITADVIFRTIMSSKLDEEKGKKILNAFVTFQE  
QSVHTAMRRMFRFPKWLSYVLGDCKRAKAGDVIRQVLSDIKPRYDMADNAEFEDILGSL  
LLVVDADTNKRFSFEEILDQVAMLFLAGHETTASSLTWTLYLLSLYPKEQEKAYEEITQV  
LQGGVIEISHLRQFKYL TNIFKESLRLYPPVGFFAREAKKDTQVRDKLIKKGSGVVIAPW  
LIHRHEEFWTNPHGFNPSRFEGEYKKDAYLPFGVGERICIGQGFMQEAILILANILKTY  
KLELEEGFVPDVVGRLTVRSANGMRIKFSKRKL

>BN867\_13910|KEGG|CYP172A|[Campylobacter jejuni 4031]cjx|EP

MSECPFFPKPYKNKASTLLTFLLKRRSWLDGLYERSYKMQTGYVKMPNFDLYVINDTKEV  
KRMMVDEVREFPKSAFLHELLSPLLGESIFTTNGEVWKKQRELLRPSFEMTRINKVFNL  
SEAVADMMDRFSKYPNHAVIEVDEAMTFITADVIFRTIMSSKLDEGKGKKILNAFVTFQE  
QSVHTAMRRMFRFPKWLSYVLGDRKRTKAGDVIRQVLSDIKPRYDMADNAEFEDILGSL  
LLVVDADTNKRFSFEEILDQVAMLFLAGHETTASSLTWTLYLLSLYPKEQEKAYEEITQV  
LQGGAIEISHLRQFKYL TNIFKESLRLYPPVGFFAREAKKDTQVRDKLIKKGSGVVIAPW  
LIHRHEEFWTNPHGFNPSRFEGEYKKDAYLPFGVGERICIGQGFMQEAILILANILKTY  
KLELEEGFVPDVVGRLTVRSANGMRIKFSKRKL

>CLA\_0322|KEGG|CYP172A|[Campylobacter lari RM2100]cla|EP

MGQCPFHPPKPYKNKASTLTTFLKRRSWLDGLYERSYKMMGRVKMPGFDLYVVNDPKEV  
RRIMVDEVREYPKSQLLHELLEPLLGISIFTTNDRVWEKQRELLRPSFEMTRISKVFNL  
SEAASDMMARFAKYEDKAIVEVDEAMTFVTADVIFRTIMSSKLDEQKGKLVLDAFVTVQE  
ETVKTAMRRMFRFPTWLSNLLGERKRLKAGGVIRKVLSDI IKPRYDNATNDQGYEDILS  
SLLMVVDADTNERFSFNEILDQVAMLFLAGHETTASSLTWTLYILSISPNEQQKAYEEIM  
QVAGDEEFKIEHIRAMKYLTNVFKESLRLYPPVGFFAREARNDNKMRDKLIKKGSGVVVA  
PWLIHRHDSFWENPHEFDPSRHEDKSKIKKDTYMPFGMGERVIGQGFAMQETVLILANI  
LRTYKLELEENFIPDIVGRLTIRSANGMNIRFIKRQK

>UPTC16701\_0323|KEGG|CYP172A|[Campylobacter lari RM16701]clr|EP

MGQCPFHPPKPYKNKASTLTTFLKRRSWLDGLYERSYKMMGRVKMPGFDLYVVNDPKEV  
RRIMVDEVREYPKSQLLHELLEPLLGISIFTTNDRVWEKQRELLRPSFEMTRISKVFNL  
SEAASDMMARFAKYEDKAIVEVDEAMTFVTADVIFRTIMSSKLDEQKGKLVLDAFVTVQE  
ETVKTAMRRMFRFPTWLSNLLGERKRLKAGTTIRKVLSDI IKPRYDNAINDQGYEDILS  
SLLMVVDADTNERFSFNEILDQVAMLFLAGHETTASSLTWTLYILSISPNEQQKAYEEIM  
QVAGDEEFKIEHIRAMKYVTNVFKESLRLYPPVGFFAREARNDNKMRDKLIKKGSGVVVA  
PWLIHRHDSFWENPHEFDPSRHEDKSKIKKDTYMPFGMGERVIGQGFAMQEA VLILANI  
LRTYKLELEENFVPDIVGRLTIRSANGMNIRFIKRQK

>UPTC16712\_0326|KEGG|CYP172A|[Campylobacter lari RM16712]clm|EP

MGQCPFHPPKPYKNKASTLTTFLKRRSWLDGLYERSYKMMGRVKMPGFDLYVVNDPKEV  
RRIMVDEVREYPKSQLLHELLEPLLGISIFTTNDRVWEKQRELLRPSFEMTRISKVFNL  
SEAASDMMARFAKYEDKAIIEVDEAMTFVTADVIFRTIMSSKLDEQKGKLVLDAFVTVQE  
ETVKTAMRRMFRFPTWLSNLLGERKRLKAGGVIRKVLSDI IKPRYDNALNDQGYEDILS  
SLLMVVDVDTNERFSFNEILDQVAMLFLAGHETTASSLTWTLYILSISPNEQQKAYEEIM  
QVTGDGEFKIEHIRAMKYLTNVFKESLRLYPPVGFFAREARNESKMRDKLIKKGSGVVVA  
PWLIHRHDSFWKNPHEFDPSRHEDKSKIKKDTYMPFGMGERVIGQGFAMQEA VLILANI  
LRTYKLELEENFVPDIVGRLTIRSANGMNIRFIKRQK



>UPTC3659\_0339|KEGG|CYP172A|[Campylobacter lari NCTC 11845]cln|EP

MGQCPFHPPKPYKNKASTLTTFLKRRSWLDGLYERSYKMMGRVKMPGFDLYVVNDPKEV  
RRIMVDEVREYPKSQLLHELLEPLLGISIFTTNDRVWEKQRELLRPSFEMTRISKVFNL  
SEAASDMMARFAKYEDKAIIEVDEAMTFVTADVIFRTIMSSKLDEQKGKLVLDAFVTVQE  
ETVKTAMRRMFRFPTWLSNLLGERKRLKAGGVIRKVLSDI IKPRYDNTTNDQGYEDILS  
SLLMVVDADTNERFSFNEILDQVAMLFLAGHETTASSLTWTLYILSISPDEQQKAYEEIM  
QVAGDEEFKIEHIRAMKYLTNVFKESLRLYPPVGFFAREARNDNKMARDKLIKKGSGVVVA  
PWLIHRHDSFWENPHEFDPSRHEDKSKIKKDTYMPFGMGERVICIGQGFAMQEAVLILANI  
LRTYKLELEENFVPDIVGRLTIRSANGMNIRFIKRQK

>CONCH\_0330|KEGG|CYP172A|[Campylobacter lari subsp. concheus LMG 11760]c11|EP

MGQCPFHPPKPYKNKASTLTTFLKRRSWLDGLYERSYKMMGRVKMPGFDLYVVNDPKEV  
RRIMVDEVREYPKSQLLHELLEPLLGISIFTTNDRVWEKQRELLRPSFEMTRISKVFNL  
SEAASDMMARFAKYEDKAIVEVDEAMTFVTADVIFRTIMSSKLDEQKGKLVLDAFVTVQE  
ETVKTAMRRMFRFPTWLSNLLGERKRLKAGGVIRKVLSDI IKPRYDNATNDQGYEDILS  
SLLMVVDADTNERFSFNEILDQVAMLFLAGHETTASSLTWTLYILSISPNEQQKAYEEIM  
QVAGNEEFKIEHIRAMKYLTNVFKESLRLYPPVGFFAREARNESKMRDKLIKKGSGVVVA  
PWLIHRHDSFWENPHEFDPSRHEDKSKIKKDTYMPFGMGERVICIGQGFAMQEAVLILANI  
LRTYKLELEENFVPDIVGRLTIRSANGMNIRFIKRQK

>BN865\_07260|KEGG|CYP172A|[Campylobacter coli 76339]ccol|EP

MSQCPFFPKPYKNKASTLLTFLKRRSWLDGLYERSYKMQTGYVKMPNFDLYVINDTKEV  
KRMMVDEVKEFPKSAFLHELLSPLLGESIFTTNGEVWKKQRELLRPSFEMTRISKVFNL  
SEAVEDMMKRFEKYPNGSIIIEVDEAMTFITADVIFRTIMSSKLDEEQGKKILDVFTFQE  
QSVHTAMRRMFRFPKWSYVLGDRKRAKAGDVIRQVLSDI IKPRYDAVSSGKAQSFEDIL  
GSLLLVVDQTNQRFSEIEILDQVAMLFLAGHETTASSLTWTLYLLSLYPDEQEKAYKEI  
IQVLQGENIQISHLRQFKYLTNIFKESLRLYPPVGFFAREAKKDTKIRDKMVKKGSGVVV  
APWLIHRHESFWNNPHEFKPSRFESEYKKDAYLPFGAGERICIGQGFAMQEAILILASIL

RKYKLELEEGFVPDVVGRLTVRSANGMNIKFTKRES

>G157\_01790|KEGG|CYP172A|[Campylobacter coli CVM N29710]ccc|EP

MSQCPFFPKPYKNKASTLLTFLKRRSWLDGLYERSYKMQTGYVKMPNFDLYVINDTKEV  
KRMMVDEVKEFPKSAFLHELLSPLLGESIFTTNGEVWKKQRELLRPSFEMTRISKVFNL  
SEAVSDMMKRFEKYPNASIIIEVDEAMTFITADVIFRTIMSSKLDEEQGKKILDAFVTFQE  
QSVHTAMRRMFRRFPKWLSYVLGDRKRAKAGDVIRQALSDIIKPRYDAVSSGKAENFEDIL  
GSLLLVVDAQTNQRFSEIEILDQVAMFLAGHETTASSLTWTLYLLSLYPDEQEKAYKEI  
IQVLQGENIQISHLKQFRYLTHIFKESLRLYPPVGFFAREAKKDTKVRDKMIKKGSGVVI  
APWLIHRHEGFWANPHEFKPSRFEGEYKKDAYLPFGVGERICIGQGAMQEAILILANIL  
KKYKLELEEGFVPDVVGRLTIRSANGMRIKFSKREP

>N149\_1372|KEGG|CYP172A|[Campylobacter coli 15-537360]ccq|EP

MSQCPFFPKPYKNKASTLLTFLKRRSWLDGLYERSYKMQTGYVKMPNFDLYVINDTKEV  
KRMMVDEVKEFPKSAFLHELLSPLLGESIFTTNGEVWKKQRELLRPSFEMTRISKVFNL  
SEAVSDMMKRFEKYPNASIIIEVDEAMTFITADVIFRTIMSSKLDEEQGKKILDAFVTFQE  
QSVHTAMRRMFRRFPKWLSYVLGDRKRAKAGDVIRQALSDIIKPRYDAVSSGKAENFEDIL  
GSLLLVVDAQTNQRFSEIEILDQVAMFLAGHETTASSLTWTLYLLSLYPDEQEKAYKEI  
IQVLQGENIQISHLKQFRYLTHIFKESLRLYPPVGFFAREAKKDTKVRDKMIKKGSGVVI  
APWLIHRHEGFWANPHEFKPSRFEGEYKKDAYLPFGVGERICIGQGAMQEAILILANIL  
KKYKLELEEGFVPDVVGRLTIRSANGMRIKFSKREP

>YSQ\_01815|KEGG|CYP172A|[Campylobacter coli RM1875]ccf|EP

MSQCPFFPKPYKNKASTLLTFLKRRSWLDGLYERSYKMQTGYVKMPNFDLYVINDTKEV  
KRMMVDEVKEFPKSAFLHELLSPLLGESIFTTNGEVWKKQRELLRPSFEMTRISKVFNL  
SEAVSDMMKRFEKYPNASIIIEVDEAMTFITADVIFRTIMSSKLDEEQGKKILDAFVTFQE  
QSVHTAMRRMFRRFPKWLSYVLGDRKRAKAGDVIRQVLSDDIIKPRYDAVNSEKAQSFEDIL  
GSLLLVVDAQTNQRFSEIEILDQVAMFLAGHETTASSLTWTLYLLSLYPDEQEKAYKEI

IQVLQGENIQISHLRQFKYLTNIFKESLRLYPPVGFFAREAKKDTKIRDKMIKKGSGVVI  
APWLIHRHEGFWANPHEFKPSRFESEYKKDAYLPFGVGERICIGQGFAMQEAILILANIL  
KKYKLELEEGFVPDVVGRLTVRSANGMRIKFSKREP

>YSS\_07600|KEGG|CYP172A|[Campylobacter coli RM4661]ccy|EP

MSQCPFFPKPYKNKASTLLTFLKRRSWLDGLYERSYKMQTGYVKMPNFDLYVINDTKEV  
KRMMVDEVKEFPKSAFLHELLSPLLGESIFTTNGEVWKKQRELLRPSFEMTRISKVFNL  
SEAVSDMMKRFEKYPNASIIIEVDETMTFITADVIFRTIMSSKLDEEQGKKILDAFVTFQE  
QSVHTAMRRMFRFPKWLSYVLGDRKRAKAGDVIRQALSDIIKPRYDAVSSGKAENFEDIL  
GSLLLVVDAQTNQRFSEIEILDQVAMLFAGHETTASSLTWTLYLLSLYPDEQEKAYKEI  
IQVLQGENIQISHLKQFRYLTHIFKESLRLYPPVGFFAREAKKDTKVRDKMIKKGSGVVI  
APWLIHRHEGFWANPHEFKPSRFESEYKKDAYLPFGVGERICIGQGFAMQEAILILANIL  
KKYKLELEEGFVPDVVGRLTIRSANGMRIKFSKRES

>YSU\_01845|KEGG|CYP172A|[Campylobacter coli RM5611]ccoi|EP

MSQCPFFPKPYKNKASTLLTFLKRRSWLDGLYERSYKMQTGYVKMPNFDLYVINDTKEV  
KRMMVDEVKEFPKSAFLHELLSPLLGESIFTTNGEVWKKQRELLRPSFEMTRISKVFNL  
SEAVSDMMKRFEKYPNASIIIEVDEAMTFITADVIFRTIMSSKLDEEQGKKILDAFVTFQE  
QSVHTAMRRMFRFPKWLSYVLGDRKRAKAGDVIRQALSDIIKPRYDAVSSGKAENFEDIL  
GSLLLVVDAQTNQRFSEIEILDQVAMLFAGHETTASSLTWTLYLLSLYPDEQEKAYKEI  
IQVLQGENIQISHLKQFRYLTHIFKESLRLYPPVGFFAREAKKDTKVRDKMIKKGSGVVI  
APWLIHRHEGFWANPHEFKPSRFESEYKKDAYLPFGVGERICIGQGFAMQEAILILANIL  
KKYKLELEEGFVPDVVGRLTIRSANGMRIKFSKRES

>VC76\_07055|KEGG|CYP172A|[Campylobacter coli FB1]ccof|EP

MSQCPFFPKPYKNKASTLLTFLKRRSWLDGLYERSYKMQTGYVKMPNFDLYVINDTKEV  
KRMMVDEVKEFPKSAFLHELLSPLLGESIFTTNGEVWKKQRELLRPSFEMTRISKVFNL  
SEAVSDMMKRFEKYPNASIIIEVDEAMTFITADVIFRTIMSSKLDEEQGKKILDAFVTFQE

QSVHTAMRRMFRRFPKWLSYVLGDRKRAKAGDVIRQALSDI IKPRYDAVSSGKAENFEDIL  
GSLLLVVDQAQTNQRFSEEEILDQVAMLFLAGHETTASSLTWTLYLLSLYPKEQEKAYEEI  
TQVLQGGVIEISHLRQFKYLTNIFKESLRLYPPVGFFAREAKKDTKVRDKMIKKGSGVVI  
APWLIHRHEGFWANPHEFKPSRFEGEYKKDAYLPFGVGERICIGQGAMQEAILILANIL  
KKYKLELEEGFVPDVVGRLTIRSANGMRIKFSKREP

>ATE51\_00744|KEGG|CYP172A|[Campylobacter coli OR12]ccoo|EP

MSQCPFFPKPYKNKASTLLTFLKRRSWLDGLYERSYKMQTGYVKMPNFDLYVINDTKEV  
KRMMVDEVKEFPKSAFLHELLSPLLGESIFTTNGEVWKKQRELLRPSFEMTRISKVFNLM  
SEAVSDMMKRFEKYPNASIIIEVDEAMTFITADVIFRTIMSSKLDEEQGKKILDAFVTFQE  
QSVHTAMRRMFRRFPKWLSYVLGDRKRAKAGDVIRQALSDI IKPRYDAVSSGKAENFEDIL  
GSLLLVVDQAQTNQRFSEEEILDQVAMLFLAGHETTASSLTWTLYLLSLYPKEQEKAYEEI  
TQVLQGGVIEISHLRQFKYLTNIFKESLRLYPPVGFFAREAKKDTKVRDKMIKKGSGVVI  
APWLIHRHEGFWANPHEFKPSRFEGEYKKDAYLPFGVGERICIGQGAMQEAILILANIL  
KKYKLELEEGFVPDVVGRLTIRSANGMRIKFSKREP

>CINS\_0316|KEGG|CYP172A|[Campylobacter insulaenigrae]cis|EP

MGQCPFYKPYKNKASTLATFLFKRRSWLDGLYERSYKMMGRVKMPGFDLYVVNDPKEV  
RRIMVDEVREYPKSQLLHELLEPLLGVSIFFTNDRVWEKQRELLRPSFEMTRISKVFDLM  
SQAANDMMIRFAKCDDGKIIIEVDEAMTFVTADVIFRTIMSSKLDEQKGKIVLDAFVTVQE  
ETIKTAMRKMFRRPNWLSNFLGEKKRLKAGSTIRKVLSDI IKPRYDNALADQGKYKDILS  
SLLMVVDEDTNERFSFNEILDQVAMLFLAGHETTASSLTWTLYILSISQNEQQKAYEEII  
QVANFNDFKIEHIKEMKYLTNVFKESLRLYPPVGFFAREARHESKMRDKLIQEGSGVVVA  
PWLIHRHDNFWENPHEFDPTRYEDKGKIKKDTYMPFGMGERVICIGQGAMQEAILILANI  
LRTYKLELEENFIPDIVGRLTIRSANGMRIKFIKRKK

>CVOL\_0316|KEGG|CYP172A|[Campylobacter volucris]cvo|EP

MGQCPFHKPYKNKASTLMTFLKRRSWLDGLYERSYKMMGRVQMPGFDLYVVNDPKEV

RRIMVDEVREYPKSQLLHELLEPLLGVSIFFTNGRVWEKQRELLRPSFEMTRISKVFGLM  
SEAASDMMARFDKYEDGAIIEVDEAMTFVTADVIFRTIMSSKLDEVKGKIVLDAFVTVQE  
QTVKTAMRRMFRFPTWLSNLLGEKKRLKAGMTIRKVLSDI IKPRYENALADKGKYEDILS  
SLLMVVDADTNERFSFNEILDQVAMLFLAGHETTASSLTWTLYILSISEKEQEKAYEEIM  
QVAGDEKFTIEHIKSMKYLTNIFKESLRLYPPVGFFAREAKHESKMRDKLIKEGSGVVVA  
PWLIIHRHDFWENPHEFDPSRHEDKSKIKKDTYMPFGMGERICIGQGAMQEAILILANI  
LRTYKLQLEENFTPDPVGRLTIRSANGMNIKFIKRRK

>CPel\_0328|KEGG|CYP172A|[Campylobacter peloridis]cpel|EP

MGQCPFHHPKPYKNKASTLTTFLLKRRSWLDGLYDRSYKMMMGRVKMPGFDLYVVNDPKEV  
RRIMIDEVREYPKSQLLHELLEPLLGVSIFFTNDRVWEKQRELLRPSFEMTRISKVFNLM  
SEAAADMMARFAKYEDKAIIEVDEAMTFVTADVIFRTIMSSKLDEQKGKIVLDAFVTVQE  
ETVKTAMRRMFRFPTWLSNLLGERKRLKAGGVIRKVLSDI IKPRYDNAINDQGKYEDILS  
SLLMVVDADTNERFSFNEILDQVAMLFLAGHETTASSLTWTLYILSISPKEQQKAYEEIM  
QIAGNDEFKIEHIKAMKYLTNVFKESLRLYPPVGFFAREARNESKMRDKLIKKGSGVVVA  
PWLIIHRHDFWENPHEFDPTRHEDKSKIKKDTYMPFGMGERVCIGQGAMQEAILILANI  
LRTYKLELQENFVPDIVGRLTIRSANGMNIRFIKQK

>CAQ16704\_0328|KEGG|CYP172A|[Campylobacter sp. RM16704]camr|EP

MGQCPFHHPKPYKNKASTLTTFLLKRRSWLDGLYERSYKMMMGRVKMPGFDLYVVNDPKEV  
RRIMVDEVREYPKSQLLHELLEPLLGISIFTTNDRVWEKQRELLRPSFEMTRISKVFDLM  
SDAASDMMARFNKYEDGATIEVDEAMTFVTADVIFRTIMSSKLDEQKGKIVLDAFVTVQE  
QTVKTAMRRMFRFPTWLSNLLGEKKRLKAGTTIRKVLSDI IKPRYDNALNDQGKYEDILS  
SLLMVVDADTNERFSFNEILDQVAMLFLAGHETTASSLTWTLYILSMPNEQQKAYEEIM  
QIAGKEEFKIEHIKAMKYLTNIFKESLRLYPPVGFFAREARNESKMRDKLIKKGSGVVVA  
PWLIIHRHDFWENPHEFDPSRHDDKSKIKKDTYMPFGMGERVCIGQGAMQEAILILANI  
LRTYKLELEENFVPDIVGRLTIRSANGMNIRFIKR

>CSUB8521\_0354|KEGG|CYP172A|[Campylobacter subantarcticus LMG 24374]csm|EP

MGQCPFHFKPYKNKASTLTTFLKRRSWLDGLYERSYKMMGRVKMPGFDLYVVNDPKEV  
RRIMVDEVREYPKSQLLHELLEPLLGISIFTTNDRVWEKQRELLRPSFEMTRISKVFNLM  
NEAASDMMARFAKHENGAVVEVDEAMTFVTADVIFRTIMSSKLDEQKGKLVLDAFVTVQE  
ETVKTAMRRMFRFPTWLSNLLGERKRLKAGATIRQVLSDI IKPRYDNALNDQGKYEDILS  
SLLAVVDADTNERFSFNEILDQVAMLFLAGHETTASSLTWTLYILSISPKEQQKAYEEIM  
QVAGNEEFKIEHIRAMKYVANVFKESLRLYPPVGFFAREAKNESKMRDKLIKKGSGVVVA  
PWLIIHRHDSFWENPHEFDPSRHEGKSKIKKDTYMPFGMGERVICIGQGFMQEAVLILANI  
LRTYRLELEENFVPDVVGRLTIRSANGMNIRFIKREK

>CSUB8523\_0336|KEGG|CYP172A|[Campylobacter subantarcticus LMG 24377]csf|EP

MGQCPFHFKPYKNKASTLTTFLKRRSWLDGLYERSYKMMGRVKMPGFDLYVVNDPKEV  
RRIMVDEVREYPKSQLLHELLEPLLGISIFTTNDRVWEKQRELLRPSFEMTRISKVFNLM  
NEAASDMMARFAKHENGAVVEVDEAMTFVTADVIFRTIMSSKLDEQKGKLVLDAFVTVQE  
ETVKTAMRRMFRFPTWLSNLLGERKRLKAGATIRQVLSDI IKPRYDNALNDQGKYEDILS  
SLLIVVDADTNERFSFNEILDQVAMLFLAGHETTASSLTWTLYILSISPKEQQKAYEEIM  
QVAGNEEFKIEHIRAMKYVANVFKESLRLYPPVGFFAREAKNESKMRDKLIKKGSGVVVA  
PWLIIHRHDSFWENPHEFDPSRHEGKSKIKKDTYMPFGMGERVICIGQGFMQEAVLILANI  
LRTYRLELEENFVPDVVGRLTIRSANGMNIRFIKREK

>CHELV3228\_0153|KEGG|CYP172A|[Campylobacter helveticus]chv|EP

MSGCPFFPKPYKNKASTLLTFLKRRSWLDGLYERSYKMQTGYVKMPNFDLYVINDTKEV  
KRMMVDEVREFPKSELLHRLLSPLLGESIFTTNGEVWHRQRELLKPSFEMTRISKVFNLM  
SEAVADLMARFEKYPNHSYIEVDEMMTFVTADVIFRTIMSSKLDKNEGRKILEAFVTFQE  
ESVRTAMRGMFYFPKWLSYLLGDRKRAKAGEVIRRALS DI IKPRYDEANLEKSSYEDILA  
SLLLIVDAKTNERFSFEEILDQVAMLFLAGHETTASSLTWTLYLLSLYPKEQEKAFFEIC  
EVLQDSEEIKITHLRQFKFLTNVFKEALRLYPPVGFFAREAKKDTQVRDKLVKKGSGVVI  
APWLIHRHELFWQNPHGFDPSRFEREYKKDAYLPFGMGERICIGQGFMQEAILILANIL  
RIYKLGLKENFVPDVVGRLTIRSANGMWIKFSKR

>CCUN\_1453|KEGG|CYP172A|[Campylobacter cuniculorum]ccun|EP

MSQCPFHFKPYKNKASTLLTFLLKRRSWLDGLYERSYEMQTGYVKMPNFDLYVINDPKEV  
KRIMVDEVREFPKSAFLHELLKPLLGESIFTTNGEIWSKQRELLRPSFEMTRISKVFNLN  
SEAVKDMMKRFEEKYPNDSIIIEVDEMMTFVTADVIFRTIMSSKLDEQKGKKILHAFVNFQE  
QSVHTAMRKMFREFPKWFSYILGDRKRLKSGEIIREILSDIIKPRYNAVSEGKNLGNEDIL  
ESLLLVDADAKTNQRFSEEEILDQVAMLFAGHETTASSLTWTLYLLSLYPQEQEKAYEEV  
RQILNGEEIQISHLRQFKFLTNVFKESLRLYPPVGFFAREAKKDTKIRDKNIKKSGSVVV  
APWLIHRHKHFWDNPNDFNPSRFDKEYRKDAYLPFGMGERICIGQGAMQEAILILASIL  
KIYKLELESGFVPDVVGRLTIRSANGMNIKFSKR

>CLAN\_0140|KEGG|CYP172A|[Campylobacter lanienae]clx|EP

MGVCPFHFKPHSSKAGLITTFLLKRRSWLDGLYEKSYKMRVGRVKMPGFDLFVNDPKEV  
RKIMVDNVKEFPKSDMLHELLKPLLGVSIFFTNGEVWKKQRELLRPSFEMTRISKVFDLM  
SSAAADMMERFRKYEDGAVVEVDEHMTFVTADVIFRTIMSAKLDEEKGKEILDAFVTFQE  
ETAKTAIRKFFCVPQWLSNLLGENKRIKAGAVIRKNLSNIIKPRYDNYANDTHCDILSSL  
LHTTDADSGERFSFEEILDQVSMLFLAGHETTASSLTWTLYCLSLDQDAQKAYNEIISI  
NKDSKFEISDIRDMKYLTNVFKEALRLYPPVGFFARQNKNEIKIRDKVLQKGAGVVVAPW  
LIHRHDDYWEAPHEFRPERHNENIPKERYMPFGLGERVCIGHGFAMQEAIILANILREF  
KLELKDGFIPDVVGRLTIRSANGMMIKMTQRH

>CAV\_1397|KEGG|CYP172A|[Campylobacter avium]cavi|EP

MACPFHFKPKKTKASTLMTFLLKRRSWLDGLYEKSYSMQSGRVKMPGFDLYVNDVREV  
RIMVDEVKEFPKSELLHRLLEPLLGVSIFFTNGDVWKKQRELLMPFEMTRINKVFELMK  
DAANDLLIRLEKKDKDFIDADEEMTFVTADVIFRTIMSAKLDEEKGKEILKAFSIMQEET  
IRTGIREMFCEFPKWLSKLLGENKRMKAGACIRDNLAQIIKPRYDEQREGKADYRQDILAS  
LLRVIDADTNEPFSFKEILDQVSMLFLAGHETTASSLTWTLYCLCPEPSWQEKAYDEIMQ

ITKGEELSLAHVKAFKVLNNIFKEALRLYPPVGFFPRTAKKDTKIRDKEIKAGSGVVVAP  
WLIHRHSLWQDPHEFKPQRFDEQINKDAYMPFGMGERICIGQGFAMQEAMIILASILKK  
YKLQLKENFTPDVVGRLTVRSANGMSIKFIRR

>A2J15\_004785|KEGG|CYP172A|[Campylobacter hepaticus]chw|EP

MNQCPFFPKPYKNKASTLLTFLKRRSWLDGLYERSYKMQTGYVKMPNFDLYVVNNTKEV  
KRIMVNEVRQFPKSAFLHELLSPLLGESIFTTNGDVWKKQRELLRPSFEMTGINKVFNLN  
KDAADMMQRFDKYPNNAIIEVDEAMTFVTADVIFRTIMSSKLDEEQGKKILNAFVTFQE  
QTVHTAMRRMFHFPKWFSYILGDRKRAKAGELIRQVLKDIVKPRYDKANEANQEEFKDIL  
SSLLLVDQAQTNKRFSFEEILDQVAMLFAGHETTASSLTWTLYLLSLYPKDQEKAYEEL  
CEILQNKDIEIVHLKQFKYLINIFKESLRLYPPVGFFAREAKQDTQIRDKFIKKGSGVVI  
APWLIHRHEKFWSDPNGFNPSRFEHEYQKDAYLPFGVGERICIGQGFAMQEAILILANIL  
RVYKLELEEGFVPDVVGRLTVRSANGMRIKFTKRKA

>CVIC12175\_1523|KEGG|CYP172A|[Campylobacter sp. RM12175]camz|EP

MGVCPFHFKPHNSKAGLITTFLLKRRSWLDGLYAKSYKMRAGRVKMPGFDLFVVNDPKEV  
RKIMIDNVKEFPKSDMLHELLKPLLGVSIFFTNGEVWKKQRELLKPSFEMTRISKVFDLM  
SSAAADMMERFRKYPDGSIVEVDEHMTFVTADVIFRTIMSSKLDEIKGKEILHAFVTFQE  
ETARTAIRKFFCVPQWLSNILGENKRMKAGAVIRKSLSDIIQPRYDSYKSDNYSDILSSL  
LHTVDASSGERFSFEEILDQVSMLFLAGHETTASSLTWTLYCLSLDQDAQKAYNEIISI  
NKDGKFSISDIKEMKYLTNVFKEALRLYPPVGFFARQSKGEAKIRDKVLQKSGSVVAPW  
LIHRHDDFWEAPHEFRPDRHNENIPKEKYMPFGLGERICIGQGFAMQEAIILANILREF  
KLELKDGFVPDVVGRLTVRSANGMMIKMSKRQ

>CSUIS\_0153|KEGG|CYP172A|[Campylobacter sp. RM6137]camy|EP

MGVCPFHFKPHNNKAGLITTFLLKRRSWLDGLYVKSYSKMRSGRVKMPGFDLFVVNDPNEV  
RKIMIDNVKEFPKSDLLHELLKPLLGVSIFFTNGEVWKKQRELLRPSFEMTRISKVFDLM  
SSAAADMMDRFRKYEDGSIIEVDEHMTFVTADVIFRTIMSAKLDEEKGKEILHAFVTFQE



ETARTAIRKFFCVPQWLSNILGENKRMKAGEIIRQNLSNIIKPRYDNYANDTHCDILSSL  
LHTIDADSNQRFSFEEILDQVSMFLAGHETTASSLTWTLYCLSLDQDAQQKAYNEVISI  
NKDGKFSISDIKNMRYLTNVFKEALRLYPPVGFFARQSKNDTKIRDKVLKKGSGVVAPW  
LIHRHEDFWDAPHEFRPDRHNDIPKEKYMPFGLGERICIGQGFAMQEAIILANILREF  
KLELKDGFI PDVVGRLTVRSANGMMIKMTRRQ

>CORN\_0326|KEGG|CYP172A|[Campylobacter ornithocola]coj|EP

MGQCPFHPPKPYKNKASTLTTFLKRRSWLDGLYERSYKMMGRVKMPGFDLYVVNDPKEV  
RRIMVDEVREYPKSQLLHELLEPLLGVSIFFTNDKVWEKQRELLKPSFEMTRISKVFDLM  
SEAASDMMGRFAKYENKAVIEVDEAMTFVTADVIFRTIMSSKLDEQKGKLVLD AFVTVQE  
ETVKTAMRRMFRFPTWLSNLLGEKKRLKAGGVIRKVLSDI IKPRYDNALNDQGYEDILS  
SLLMVVDADTNKRFSFNEILDQVAMLFLAGHETTASSLTWTLYILSISPNEQQKAYEEII  
QVAGNGEFKIEHIRAMKYVTNVFKESLRLYPPVGFFAREARNESKMRDKLIKKGSGVVVA  
PWLIHRHDNFWENPHEFDPSRHEDKGKIKKDTYMPFGMGERICIGQGFAMQEAVLILANI  
LRTYKLELEENFVPDIVGRLTIRSANGMNIRFIKRQK

>CUP3940\_1510|KEGG|CYP172A|[Campylobacter upsaliensis]cux|EP

MSECPFFPKPYKNKASTLLTFLKRRSWLDGLYERSYQMQTGYVKMPNFDLYVINDTKEV  
KRMMVDEVREFPKSELLHRLLSPLLGESIFTTNGEVVHKQRELLKPSFELTRISKVFNLN  
SEAVADLMRRFEKYPDNSYIEVDEMFTFVTADVIFRTIMSSKLDEVQGRQILEAFATFQE  
ESVRTAMRGMFYFPKWLSYLLGDRKRAKAGELIRKALSDI IKPRYEANLEKSDYEDILSS  
LLLVDADAKTNQRFSFEEILDQVAMLFLAGHETTASSLTWTLYLLSLYPEEQERAYNEICE  
ILQDSKEIKIAHLRQFKFLT NVFKESLRLYPPVGFFAREAKKDTQVRDKLIKQSGGVIA  
PWLIHRHELFWQNPFGFDPSRFEREYKKEAYLPFGMGERICIGQGFAMQEAILILANILK  
TYRLELKEDFVPDVVGRLTIRSLNGMWIKFSKR

>CARM\_0293|KEGG|CYP172A|[Campylobacter armoricus]carm|EP

MGQCPFHPPKPYKNKASTLTTFLFKRRSWLDGLYERSYKMMGRVQMPGFDLYVVNDPKEV

RRIMVDEVREYPKSQLLHELLEPLLGVSIFFTNGRVWEKQRELLRPSFEMTRISKVFGLM  
SEAASDMMARFAKYEDKAIIEVDEAMTFVTADVIFRTIMSSKLDEQKGKIVLDAFVTVQE  
QTVKTAMRRMFRFPTWLSNLLGERKRLKAGGVIRKVLSDI IKPRYENALNDQGKYEDILS  
SLLMVVDADTNERFSFDEILDQVAMLFLAGHETTASSLTWTLYILSMSPNEQQKAYEEIM  
QVAGDEKFTIEHIKSMKYLTNIFKESLRLYPPVGFFAREARNESKMRDKLIKKGSGVVVA  
PWLIIHRHDSFWENPHEFDPSRHEDKSKIKKDTYMPFGMGERICIGQGAFAMQEAILILANI  
LRTYKLELEENFVPDIVGRLTIRSANGMNIRFIKR

>CNZW441b\_1292|KEGG|CYP172A|[Campylobacter novaezeelandiae]cnv|EP

MSQCPFFPKPYKTKASTLLTFLKRRSWLDGLYERSYKMQTGYVKMPNFDLYVINDTKEV  
KRIMIDEVKEFPKSEFLHQLLSPLLGESIFTTNGEVWRKQRELLRPSFEMTRINKVFNL  
SEAVADMMSRFEKYHDESIIEVDEAMTFVTADVIFRTIMSSKLDEKKGKKVLDAFVTFQE  
QSVHSAMRRMFRFPKWISYILGDKKRLQAGETIREVLSEIIRPRYESFDPQNTNEFDILE  
SLLCVIDANTNKRFSFEEILDQVAMLFLAGHETTASSLTWTLYLLSSFEDEQEKA  
YREVE  
EVLQGKDIEITHLKQFKILTNI  
FKESLRLYPPVGFFAREAKQDTKIR  
DKFVKKGSGVVVA  
PWLIIQRHENYWEKPNEFNPSRFEGDYKKDAYLPFGMGERICIGQAFAMQEAILILANILR  
KYKLQLQEGFIPDVVGRLTVRSANGMNIKFIKRKK

>AMYT\_2277|KEGG|CYP2724A1|[Helicobacter winthamensis]amyt|EP  
MKSLIPPQLKFQPLKNIKATSALRAMLYAEEFWPEEILNKPSVSLKTTTGELLFLSDPFL  
VKEVLTRNDGTIPRSRLQQRFAGHGTGRENVITDIGKRSAMHRKTLAPLFPDRFNTYFP  
FIKMTLEEAIKPIFDAIEKKEPIDIGRVCVNGTFGVIWQILFGEDKKLTPPLIVEQMANT  
LYEAGLSGELTQTSKAVKQAKEISLSLRPLVPLVSDTPFAKNPKINLQLTNKELEDNAQF  
LLTSGHESTALTITWALFLLAHYQDEQELIANEIKNILGNKELTLDILHKLPRLNNLFNE  
TMRLYPSAILVNRETIQDVTVGELSIKKGTTQIAVCFYSMHRHKNYWKEPDSFNPDRFNTL  
NKEQLRAFMFPSTGHHSCLGKLAWEAMTILTTILKDKVILCKNSIKPIARYTLRPDG  
PVMLEVQKRN

Table S4. Identification of P450s that are part of the secondary metabolite biosynthetic gene clusters (sm-BGCs) in alphaproteobacterial species. Reference cluster information was obtained by performing BLAST at the anti-SMASH database [3], as indicated in the materials and methods section. The cluster type and most similar known cluster names available in the anti-SMASH database[3], were listed in the table.

*Betaproteobacteria*

| Species name                                        | Species code | No of P450s part of cluster | Region        | Type                              | Most similar known cluster | Similarity | P450      |
|-----------------------------------------------------|--------------|-----------------------------|---------------|-----------------------------------|----------------------------|------------|-----------|
| <i>Chromobacterium phragmitis</i> IIBBL 112-1       | chri         | 1                           | Region 4      | transAT-PKS,NRPS,NRPS-like        | sorangicin A               | 8%         | CYP261D1  |
| <i>Aquitalea magnusonii</i>                         | amah         | 1                           | Region 3      | butyrolactone                     |                            |            | CYP1200A5 |
| <i>Ralstonia syzygii</i> subsp. <i>celebesensis</i> | rsg          | 1                           | Region 5      | transAT-PKS,NRPS-like,siderophore | rhizoxin A                 | 100%       | CYP1464A2 |
| <i>Cupriavidus basilensis</i>                       | cbw          | 1                           | Region 2      | NRPS-like                         | iturin                     | 22%        | CYP107DG5 |
| <i>Burkholderia mallei</i> ATCC 23344               | bma 2        | 2                           | Region 1      | RiPP-like                         |                            |            | CYP1488A1 |
|                                                     |              |                             | Region 1<br>1 | hglE-KS,terpene                   | lipopolysaccharide         | 16%        | CYP1013A3 |
| <i>Burkholderia mallei</i> SAVP1                    | bmv 2        | 2                           | Region 6      | hglE-KS,terpene                   | myxochromide D             | 20%        | CYP1013A3 |
|                                                     |              |                             | Region 7      | RiPP-like                         |                            |            | CYP1488A1 |
| <i>Burkholderia mallei</i> NCTC 10229               | bml 2        | 2                           | Region 7      | hglE-KS,terpene                   | myxochromide D             | 20%        | CYP1013A3 |

|                                        |        |   |               |                 |                                                                                                                                             |     |           |
|----------------------------------------|--------|---|---------------|-----------------|---------------------------------------------------------------------------------------------------------------------------------------------|-----|-----------|
|                                        |        |   | Region 8      | RiPP-like       |                                                                                                                                             |     | CYP1488A1 |
| <i>Burkholderia mallei</i> NCTC 10247  | bmn 2  | 2 | Region 1      | RiPP-like       |                                                                                                                                             |     | CYP1488A1 |
|                                        |        |   | Region 1<br>1 | hglE-KS,terpene | myxochromide D                                                                                                                              | 20% | CYP1013A3 |
| <i>Burkholderia mallei</i> 23344       | bmal 2 | 2 | Region 2      | RiPP-like       |                                                                                                                                             |     | CYP1488A1 |
|                                        |        |   | Region 3      | terpene,hglE-KS | myxochromide D                                                                                                                              | 20% | CYP1013A3 |
| <i>Burkholderia mallei</i> 6           | bmae 2 | 1 | Region 7      | RiPP-like       |                                                                                                                                             |     | CYP1488A1 |
| <i>Burkholderia mallei</i> BMQ         | bmaq 2 | 2 | Region 6      | RiPP-like       |                                                                                                                                             |     | CYP1488A1 |
|                                        |        |   | Region 7      | terpene,hglE-KS | myxochromide D                                                                                                                              | 20% | CYP1013A3 |
| <i>Burkholderia mallei</i> 2000031063  | bmai 2 | 2 | Region 1      | RiPP-like       |                                                                                                                                             |     | CYP1488A1 |
|                                        |        |   | Region 1<br>1 | hglE-KS,terpene | myxochromide D                                                                                                                              | 20% | CYP1013A3 |
| <i>Burkholderia mallei</i> FMH 23344   | bmaf 2 | 2 | Region 5      | hglE-KS,terpene | N-myristoyl-D-asparagine /<br>cis-7-tetradecenoyl-D-<br>asparagine / (R)-N1-((S)-5-<br>oxohexan-2-yl)-2-<br>tetradecanamidossuccinamid<br>e | 8%  | CYP1013A3 |
|                                        |        |   | Region 6      | RiPP-like       |                                                                                                                                             |     | CYP1488A1 |
| <i>Burkholderia mallei</i> NCTC 10247  | bmaz 2 | 2 | Region 1      | NRPS            | glidopeptin                                                                                                                                 | 62% | CYP1488A1 |
|                                        |        |   | Region 1<br>1 | hserlactone     | L-2-amino-4-methoxy-trans-<br>3-butenic acid                                                                                                | 20% | CYP1013A3 |
| <i>Burkholderia mallei</i> 2002734299  | bmab 2 | 2 | Region 8      | RiPP-like       |                                                                                                                                             |     | CYP1488A1 |
|                                        |        |   | Region 9      | terpene,hglE-KS | myxochromide D                                                                                                                              | 20% | CYP1013A3 |
| <i>Burkholderia pseudomallei</i> 1710b | bpm 2  | 2 | Region 1<br>0 | hglE-KS,terpene | myxochromide D                                                                                                                              | 20% | CYP1013A3 |
|                                        |        |   | Region 1<br>1 | RiPP-like       |                                                                                                                                             |     | CYP1488A1 |

|                                             |        |   |               |                 |                |     |           |
|---------------------------------------------|--------|---|---------------|-----------------|----------------|-----|-----------|
| <i>Burkholderia pseudomallei</i> 1106a      | bpl 2  | 2 | Region 1      | RiPP-like       |                |     | CYP1488A1 |
|                                             |        |   | Region 1<br>7 | hgIE-KS,terpene | myxochromide D | 20% | CYP1013A3 |
| <i>Burkholderia pseudomallei</i> 668        | bpd 2  | 2 | Region 1      | RiPP-like       |                |     | CYP1488A1 |
|                                             |        |   | Region 1<br>7 | hgIE-KS,terpene | myxochromide D | 20% | CYP1013A3 |
| <i>Burkholderia pseudomallei</i> MSHR305    | bpse 1 | 2 | Region 1<br>3 | hgIE-KS,terpene | myxochromide D | 20% | CYP1013A3 |
|                                             |        |   | Region 1<br>4 | RiPP-like       |                |     | CYP1488A1 |
| <i>Burkholderia pseudomallei</i> MSHR511    | bpsm 2 | 2 | Region 2      | RiPP-like       |                |     | CYP1488A1 |
|                                             |        |   | Region 3      | terpene,hgIE-KS | myxochromide D | 20% | CYP1013A3 |
| <i>Burkholderia pseudomallei</i> MSHR146    | bpsu 2 | 2 | Region 1<br>4 | hgIE-KS,terpene | myxochromide D | 20% | CYP1013A3 |
|                                             |        |   | Region 1<br>5 | RiPP-like       |                |     | CYP1488A1 |
| <i>Burkholderia pseudomallei</i> MSHR520    | bpsd 2 | 2 | Region 7      | hgIE-KS,terpene | myxochromide D | 20% | CYP1013A3 |
|                                             |        |   | Region 8      | RiPP-like       |                |     | CYP1488A1 |
| <i>Burkholderia pseudomallei</i> 1026b      | bpz 2  | 2 | Region 1      | RiPP-like       |                |     | CYP1488A1 |
|                                             |        |   | Region 1<br>5 | hgIE-KS,terpene | myxochromide D | 20% | CYP1013A3 |
| <i>Burkholderia pseudomallei</i> BPC006     | bpq 2  | 2 | Region 1      | RiPP-like       |                |     | CYP1488A1 |
|                                             |        |   | Region 1<br>7 | hgIE-KS,terpene | myxochromide D | 20% | CYP1013A3 |
| <i>Burkholderia pseudomallei</i> NCTC 13179 | bpk 2  | 2 | Region 8      | hgIE-KS,terpene | myxochromide D | 20% | CYP1013A3 |
|                                             |        |   | Region 9      | RiPP-like       |                |     | CYP1488A1 |

|                                                 |        |   |               |                                     |                 |      |           |
|-------------------------------------------------|--------|---|---------------|-------------------------------------|-----------------|------|-----------|
| <i>Burkholderia pseudomallei</i><br>HBPUB10134a | bpsH 2 | 2 | Region 1<br>4 | RiPP-like                           |                 |      | CYP1488A1 |
|                                                 |        |   | Region 1<br>5 | terpene,hgIE-KS                     | myxochromide D  | 20%  | CYP1013A3 |
| <i>Burkholderia pseudomallei</i><br>NAU35A-3    | bpsA 2 | 2 | Region 2      | RiPP-like                           |                 |      | CYP1488A1 |
|                                                 |        |   | Region 3      | terpene,hgIE-KS                     | myxochromide D  | 20%  | CYP1013A3 |
| <i>Burkholderia pseudomallei</i><br>A79A        | bpsO 2 | 2 | Region 1<br>2 | RiPP-like                           |                 |      | CYP1488A1 |
|                                                 |        |   | Region 1<br>3 | terpene,hgIE-KS                     | myxochromide D  | 20%  | CYP1013A3 |
| <i>Burkholderia pseudomallei</i><br>TSV202      | but 2  | 2 | Region 7      | RiPP-like                           |                 |      | CYP1488A1 |
|                                                 |        |   | Region 8      | terpene,hgIE-KS                     | myxochromide D  | 20%  | CYP1013A3 |
| <i>Burkholderia thailandensis</i> E264          | bte 2  | 2 | Region 1      | Ripp-Like                           |                 |      | CYP1488A2 |
|                                                 |        |   | Region 1<br>4 | hgIE-KS,terpene                     | myxochromide D  | 20%  | CYP1013A3 |
| <i>Burkholderia thailandensis</i><br>2002721723 | btq 2  | 2 | Region 2      | RiPP-like                           |                 |      | CYP1488A2 |
|                                                 |        |   | Region 1<br>5 | hgIE-KS                             | myxochromide D  | 20%  | CYP1013A3 |
| <i>Burkholderia thailandensis</i> E444          | btj 2  | 2 | Region 7      | hgIE-KS,terpene                     | myxochromide D  | 20%  | CYP1013A3 |
|                                                 |        |   | Region 8      | RiPP-like                           |                 |      | CYP1488A2 |
| <i>Burkholderia thailandensis</i><br>H0587      | btz 2  | 1 | Region 1<br>3 | RiPP-like                           |                 |      | CYP1488A2 |
| <i>Burkholderia thailandensis</i><br>MSMB121    | btd 2  | 2 | Region 2      | transAT-PKS,PKS-like,NRPS,NRPS-like | thailanstatin A | 100% | CYP1486A1 |
|                                                 |        |   | Region 7      | RiPP-like                           |                 |      | CYP1488A2 |
| <i>Burkholderia thailandensis</i><br>MSMB59     | btv 2  | 2 | Region 7      | RiPP-like                           |                 |      | CYP1488A2 |
|                                                 |        |   | Region 8      | terpene,hgIE-KS                     | myxochromide D  | 20%  | CYP1013A3 |

|                                                          |        |   |               |                 |                |     |            |
|----------------------------------------------------------|--------|---|---------------|-----------------|----------------|-----|------------|
| <i>Burkholderia thailandensis</i> E254                   | bthe 2 | 2 | Region 1<br>0 | hgIE-KS,terpene | myxochromide D | 20% | CYP1013A3  |
|                                                          |        |   | Region 1<br>1 | RiPP-like       |                |     | CYP1488A2  |
| <i>Burkholderia thailandensis</i><br>USAMRU Malaysia #20 | bthm 2 | 2 | Region 1<br>0 | hgIE-KS,terpene | myxochromide D | 20% | CYP1013A3  |
|                                                          |        |   | Region 1<br>1 | RiPP-like       |                |     | CYP1488A2  |
| <i>Burkholderia thailandensis</i><br>2003015869          | btha 2 | 2 | Region 1<br>3 | hgIE-KS,terpene | myxochromide D | 20% | CYP1013A3  |
|                                                          |        |   | Region 1<br>4 | RiPP-like       |                |     | CYP1488A2  |
| <i>Burkholderia thailandensis</i><br>2002721643          | bthl 2 | 2 | Region 1<br>1 | hgIE-KS,terpene | myxochromide D | 20% | CYP1013A3  |
|                                                          |        |   | Region 1<br>2 | RiPP-like       |                |     | CYP1488A2  |
| <i>Burkholderia oklahomensis</i><br>C6786                | boc 2  | 1 | Region 5      | hgIE-KS,terpene | myxochromide D | 20% | CYP1013A3  |
| <i>Burkholderia mayonis</i>                              | buu 2  | 2 | Region 9      | terpene         | sodorifen      | 50% | CYP117C2   |
|                                                          |        |   | Region 1<br>7 | hgIE-KS,terpene | myxochromide D | 20% | CYP1013A3  |
| <i>Burkholderia multivorans</i><br>ATCC 17616 (Tohoku)   | bmj 1  | 1 | Region 2      | hgIE-KS         | myxochromide D | 20% | CYP1013A4  |
| <i>Burkholderia multivorans</i><br>ATCC 17616 (Tohoku)   | bmj 3  | 2 | Region 2      | redox-cofactor  |                |     | CYP116B113 |
|                                                          |        |   | Region 3      | terpene         | sodorifen      | 75% | CYP117C1   |
| <i>Burkholderia multivorans</i><br>ATCC 17616 (JGI)      | bmu 1  | 1 | Region 3      | hgIE-KS         | myxochromide D | 20% | CYP1013A4  |
| <i>Burkholderia multivorans</i><br>ATCC 17616 (JGI)      | bmu 3  | 2 | Region 2      | terpene         | sodorifen      | 75% | CYP117C1   |
|                                                          |        |   | Region 3      | redox-cofactor  |                |     | CYP116B113 |

|                                              |        |   |            |                                     |                                    |      |            |
|----------------------------------------------|--------|---|------------|-------------------------------------|------------------------------------|------|------------|
| <i>Burkholderia multivorans</i> DDS 15A-1    | bmk 1  | 1 | Region 2   | hgIE-KS                             | myxochromide D                     | 20%  | CYP1013A4  |
| <i>Burkholderia multivorans</i> DDS 15A-1    | bmk 3  | 2 | Region 2   | terpene                             | sodorifen                          | 75%  | CYP117C1   |
|                                              |        |   | Region 3   | redox-cofactor                      |                                    |      | CYP116B113 |
| <i>Burkholderia multivorans</i> ATCC BAA-247 | bmul 3 | 1 | Region 2   | redox-cofactor                      | lankacidin C                       | 13%  | CYP116B113 |
| <i>Burkholderia gladioli</i> BSR3            | bgd 1  | 1 | Region 3   | transAT-PKS,T3PKS,PKS-like          | isobongkreki acid / bongkreki acid | 85%  | CYP267C1   |
| <i>Burkholderia gladioli</i> ATCC 10248      | bgo 2  | 1 | Region 1 2 | terpene                             | desotamide                         | 9%   | CYP183AG1  |
| <i>Burkholderia</i> sp. 2002721687           | bul 2  | 3 | Region 1   | transAT-PKS,PKS-like,NRPS,NRPS-like | thailanstatin A                    | 100% | CYP1486A1  |
|                                              |        |   | Region 5   | RiPP-like                           |                                    |      | CYP1488A2  |
|                                              |        |   | Region 6   | terpene,hgIE-KS                     | myxochromide D                     | 20%  | CYP1013A3  |
| <i>Burkholderia plantarii</i> PG1            | bgp 2  | 1 | Region 1 1 | blactam                             |                                    |      | CYP107DN1  |
| <i>Burkholderia plantarii</i> ATCC 43733     | bpla 1 | 1 | Region 9   | CDPS                                | bicyclomycin                       | 75%  | CYP1481A2  |
| <i>Burkholderia plantarii</i> ATCC 43733     | bpla 2 | 1 | Region 1 2 | blactam                             |                                    |      | CYP107DN1  |
| <i>Burkholderia</i> sp. Bp5365               | bud 2  | 3 | Region 1   | RiPP-like                           |                                    |      | CYP1488A2  |
|                                              |        |   | Region 5   | NRPS-like,transAT-PKS,NRPS,PKS-like | thailanstatin A                    | 100% | CYP1486A1  |
|                                              |        |   | Region 1 3 | hgIE-KS,terpene                     | myxochromide D                     | 20%  | CYP1013A3  |
| <i>Paraburkholderia phymatum</i>             | bph 2  | 1 | Region 5   | terpene                             |                                    |      | CYP133C2   |
| <i>Paraburkholderia caribensis</i>           | bcai 2 | 1 | Region 1   | terpene                             |                                    |      | CYP133C2   |
| <i>Paraburkholderia hospita</i>              | phs 2  | 1 | Region 5   | terpene                             |                                    |      | CYP133C2   |
| <i>Paraburkholderia terrae</i>               | pter 2 | 1 | Region 5   | terpene                             |                                    |      | CYP133C2   |
| <i>Paraburkholderia megapolitana</i>         | pmeg 2 | 1 | Region 4   | NRPS-like                           |                                    |      | CYP1686A1  |



|                                    |      |   |          |                       |            |     |                |
|------------------------------------|------|---|----------|-----------------------|------------|-----|----------------|
| <i>Mycetohabitans rhizoxinica</i>  | brh  | 1 | Region 6 | transAT-PKS,NRPS-like | rhizoxin A | 88% | CYP1464A3      |
| <i>Achromobacter</i> sp. AONIH1    | achr | 1 | Region 6 | NRPS-like             |            |     | CYP2308A1      |
| <i>Paralcaligenes</i> sp. KSB-10   | park | 1 | Region 5 | NRPS                  |            |     | CYP107DG1<br>1 |
| <i>Acidovorax</i> sp. JS42         | ajs  | 1 | Region 2 | NRPS-like             |            |     | CYP1318A1      |
| <i>Massilia umbonata</i>           | mum  | 1 | Region 6 | linaridin             |            |     | CYP1104B1      |
| <i>Methyloversatilis</i> sp. RAC08 | metr | 1 | Region 7 | terpene               |            |     | CYP1246A       |

#### *Deltaproteobacteria*

| Species name                | Species code | Number of P450s part of clusters | Region    | Type                                                    | Most similar known cluster                                                     | Similarity | P450s     |
|-----------------------------|--------------|----------------------------------|-----------|---------------------------------------------------------|--------------------------------------------------------------------------------|------------|-----------|
| <i>Archangium violaceum</i> | avm          | 4                                | Region 26 | T1PKS,NRPS,lanthipeptide-class-ii,lanthipeptide-class-i | ajudazol A                                                                     | 84%        | CYP1224J3 |
|                             |              |                                  | Region 31 | NRPS-like                                               | glidobactin                                                                    | 10%        | CYP109R10 |
|                             |              |                                  | Region 39 | NRPS,T1PKS,NRPS-like                                    | puwainaphycin A /<br>puwainaphycin B /<br>puwainaphycin C /<br>puwainaphycin D | 50%        | CYP242A6  |
|                             |              |                                  | Region 40 | terpene                                                 |                                                                                |            | CYP1329A2 |

|                                          |      |   |                  |                          |                                                           |     |                      |
|------------------------------------------|------|---|------------------|--------------------------|-----------------------------------------------------------|-----|----------------------|
| <i>Melittangium boletus</i><br>DSM 14713 | mbd  | 4 | Reg<br>ion<br>1  | T1PKS                    | microsclerodermin M                                       | 18% | CYP253D              |
|                                          |      |   | Reg<br>ion<br>3  | proteusin                | haliamide                                                 | 29% | CYP262F1             |
|                                          |      |   | Reg<br>ion<br>5  | terpene                  |                                                           |     | CYP167B10 , CYP251V1 |
| <i>Cystobacter fuscus</i>                | cfus | 6 | Reg<br>ion<br>16 | NRPS                     |                                                           |     | CYP105EK1            |
|                                          |      |   | Reg<br>ion<br>17 | proteusin,RiPP-like      |                                                           |     | CYP120G3             |
|                                          |      |   | Reg<br>ion<br>18 | terpene                  |                                                           |     | CYP251V1             |
|                                          |      |   | Reg<br>ion<br>19 | terpene                  |                                                           |     | CYP262B4             |
|                                          |      |   | Reg<br>ion<br>28 | NRPS,T1PKS,NRPS-<br>like | minutissamide A /<br>minutissamide C /<br>minutissamide D | 30% | CYP1011E3            |
|                                          |      |   | Reg<br>ion<br>40 | terpene                  |                                                           |     | CYP183BE1            |
| <i>Sorangium cellulosum</i> So<br>ce56   | scl  | 3 | Reg<br>ion<br>13 | T3PKS                    |                                                           |     | CYP262A1             |
|                                          |      |   | Reg<br>ion<br>20 | hglE-KS,T1PKS            |                                                           |     | CYP263A1             |

|                                  |      |   |                  |                          |              |          |                   |
|----------------------------------|------|---|------------------|--------------------------|--------------|----------|-------------------|
|                                  |      |   | Reg<br>ion<br>34 | terpene                  | eremophilene | 100<br>% | CYP264B1          |
| <i>Chondromyces crocatus</i>     | ccro | 6 | Reg<br>ion<br>4  | T1PKS,NRPS,RiPP-like     |              |          | CYP110R2          |
|                                  |      |   | Reg<br>ion<br>9  | T1PKS                    |              |          | CYP263A3          |
|                                  |      |   | Reg<br>ion<br>13 | T1PKS,NRPS-<br>like,NRPS | crocacin     | 100<br>% | CYP1011F1         |
|                                  |      |   | Reg<br>ion<br>15 | NRPS,T1PKS               |              |          | CYP147L1          |
|                                  |      |   | Reg<br>ion<br>17 | NRPS,RiPP-like           |              |          | CYP107HW1         |
|                                  |      |   | Reg<br>ion<br>20 | T1PKS,NRPS-like          | ajudazol A   | 38%      | CYP107HU1         |
| <i>Sandaracinus amylolyticus</i> | samy | 2 | Reg<br>ion<br>2  | terpene                  |              |          | CYP110T1          |
|                                  |      |   | Reg<br>ion<br>15 | terpene                  |              |          | CYP51B3           |
| <i>Minicystis rosea</i>          | mrm  | 6 | Reg<br>ion<br>5  | hglE-KS,T1PKS,terpene    |              |          | CYP51B2, CYP263A2 |
|                                  |      |   | Reg<br>ion<br>8  | terpene                  |              |          | CYP183AH3         |

|                                          |     |    |           |                                |                   |     |                                                            |
|------------------------------------------|-----|----|-----------|--------------------------------|-------------------|-----|------------------------------------------------------------|
|                                          |     |    | Region 14 | NRPS-like                      | ralsolamycin      | 40% | CYP1499A1                                                  |
|                                          |     |    | Region 26 | lanthipeptide-class-ii,LAP     |                   |     | CYP1448B1                                                  |
|                                          |     |    | Region 42 | hglE-KS,T1PKS                  |                   |     | CYP1069H1                                                  |
| <i>Haliangium ochraceum</i><br>DSM 14365 | hoh | 10 | Region 1  | RRE-containing                 |                   |     | CYP107HZ1                                                  |
|                                          |     |    | Region 2  | RRE-containing                 |                   |     | CYP107JA1, CYP262C1,<br>CYP1490A1, CYP1504A1,<br>CYP1489A2 |
|                                          |     |    | Region 18 | NRPS,T1PKS,phenazine           | aurafuron A       | 71% | CYP1486B2, CYP126B3,<br>CYP110U1                           |
|                                          |     |    | Region 23 | RiPP-like                      |                   |     | CYP1069B2                                                  |
| <i>Archangium gephyra</i>                | age | 6  | Region 9  | NRPS-like,T1PKS,NRPS           | crocacin          | 38% | CYP107DP4, CYP1011E                                        |
|                                          |     |    | Region 14 | terpene,lanthipeptide-class-ii |                   |     | CYP1329A1                                                  |
|                                          |     |    | Region 19 | terpene                        |                   |     | CYP1298A1, CYP1347B3                                       |
|                                          |     |    | Region 35 | T1PKS,NRPS                     | microsclerodermin | 21% | CYP253G3                                                   |

|                                                                                |     |    |           |                           |                                                           |       |                                             |
|--------------------------------------------------------------------------------|-----|----|-----------|---------------------------|-----------------------------------------------------------|-------|---------------------------------------------|
| <i>Stigmatella aurantiaca</i><br>DW4/3-1                                       | sur | 10 | Region 1  | T1PKS,NRPS                | nostopeptolide A2                                         | 25%   | CYP1494A1                                   |
|                                                                                |     |    | Region 6  | NRPS,T1PKS,NRPS-like      | minutissamide A /<br>minutissamide C /<br>minutissamide D | 30%   | CYP1011E2                                   |
|                                                                                |     |    | Region 11 | T1PKS                     | dawenol                                                   | 100 % | CYP107DP2                                   |
|                                                                                |     |    | Region 13 | indole                    |                                                           |       | CYP120H1                                    |
|                                                                                |     |    | Region 18 | NRPS,furan,terpene        | myxochelin A / myxochelin B                               | 100 % | CYP1498A1                                   |
|                                                                                |     |    | Region 29 | T1PKS                     | aurafuron A                                               | 100 % | CYP1486B1, CYP126B2,<br>CYP264J1, CYP1495A1 |
|                                                                                |     |    | Region 38 | microviridin              | microviridin K                                            | 25%   | CYP264J1                                    |
| <i>Desulfocurvibacter africanus</i> subsp. <i>africanus</i><br>str. Walvis Bay | daf | 1  | Region 3  | NRPS-like,RiPP-like       |                                                           |       | CYP152E2                                    |
| <i>Myxococcus xanthus</i> DK 1622                                              | mxs | 1  | Region 13 | transAT-PKS,NRPS,PKS-like | myxovirescin A1                                           | 78%   | CYP209A1                                    |
| <i>Myxococcus stipitatus</i><br>DSM 14675                                      | msd | 7  | Region 11 | NRPS,T1PKS                | pyridomycin                                               | 7%    | CYP253L1                                    |
|                                                                                |     |    | Region 16 | NRPS,T1PKS                | phenalamide A2                                            | 100 % | CYP1491A1                                   |

|                                               |     |   |                  |             |                                       |          |                                              |
|-----------------------------------------------|-----|---|------------------|-------------|---------------------------------------|----------|----------------------------------------------|
|                                               |     |   | Reg<br>ion<br>19 | T1PKS,other | dawenol                               | 77%      | CYP1497A1, CYP120F1,<br>CYP1503A1, CYP1495A1 |
|                                               |     |   | Reg<br>ion<br>28 | T3PKS       | alkylpyrone-407 / alkylpyrone-<br>393 | 25%      | CYP229H1                                     |
| <i>Myxococcus hansupus</i>                    | mym | 1 | Reg<br>ion<br>3  | terpene     | geosmin                               | 100<br>% | CYP109S1                                     |
| <i>Coralloccoccus coralloides</i><br>DSM 2259 | ccx | 2 | Reg<br>ion<br>16 | NRPS        |                                       |          | CYP264D1                                     |
|                                               |     |   | Reg<br>ion<br>21 | NRPS        |                                       |          | CYP264D6                                     |

#### *Epsilonproteobacteria*

| Species<br>names | Species<br>code | No of<br>p450s | Cluster<br>Count | Region | Type | From | To | Most similar known<br>cluster | Similarit<br>y | P450 in<br>Clusters |
|------------------|-----------------|----------------|------------------|--------|------|------|----|-------------------------------|----------------|---------------------|
|------------------|-----------------|----------------|------------------|--------|------|------|----|-------------------------------|----------------|---------------------|

|                                                                                            |     |   |  |  |  |  |  |  |  |  |
|--------------------------------------------------------------------------------------------|-----|---|--|--|--|--|--|--|--|--|
| <i>Helicobacter<br/>winghamensi</i><br>s                                                   | hwi | 1 |  |  |  |  |  |  |  |  |
| <i>Campylobact<br/>er jejuni</i><br>subsp. <i>jejuni</i><br>NCTC 11168<br>= ATCC<br>700819 | cje | 1 |  |  |  |  |  |  |  |  |
| <i>Campylobact<br/>er jejuni</i><br>subsp. <i>jejuni</i><br>NCTC<br>11168-<br>BN148        | cjb | 1 |  |  |  |  |  |  |  |  |
| <i>Campylobact<br/>er jejuni</i><br>subsp. <i>jejuni</i><br>81-176                         | cjj | 1 |  |  |  |  |  |  |  |  |
| <i>Campylobact<br/>er jejuni</i><br>subsp. <i>jejuni</i><br>81116                          | cju | 1 |  |  |  |  |  |  |  |  |

|                                                                        |     |   |   |             |             |        |         |  |  |  |
|------------------------------------------------------------------------|-----|---|---|-------------|-------------|--------|---------|--|--|--|
| <i>Campylobacter jejuni</i><br>subsp. <i>jejuni</i><br>ICDCCJ0700<br>1 | cjn | 1 |   |             |             |        |         |  |  |  |
| <i>Campylobacter jejuni</i><br>subsp. <i>jejuni</i><br>IA3902          | cji | 1 |   |             |             |        |         |  |  |  |
| <i>Campylobacter jejuni</i><br>subsp. <i>jejuni</i><br>M1              | cjm | 1 |   |             |             |        |         |  |  |  |
| <i>Campylobacter jejuni</i><br>subsp. <i>jejuni</i><br>S3              | cjs | 1 |   |             |             |        |         |  |  |  |
| <i>Campylobacter jejuni</i><br>subsp. <i>jejuni</i><br>PT14            | cjp | 1 | 1 | Region<br>1 | betalactone | 858,63 | 888,467 |  |  |  |



|                                                                |      |   |   |             |             |         |         |  |  |  |
|----------------------------------------------------------------|------|---|---|-------------|-------------|---------|---------|--|--|--|
| <i>Campylobacter jejuni</i><br>subsp. <i>jejuni</i><br>00-2426 | cjej | 1 | 1 | Region<br>1 | betalactone | 859,152 | 888,989 |  |  |  |
| <i>Campylobacter jejuni</i><br>subsp. <i>jejuni</i><br>00-2538 | cjeu | 1 | 1 | Region<br>1 | betalactone | 897,707 | 927,544 |  |  |  |
| <i>Campylobacter jejuni</i><br>subsp. <i>jejuni</i><br>00-2544 | cjen | 1 | 1 | Region<br>1 | betalactone | 897,708 | 927,545 |  |  |  |
| <i>Campylobacter jejuni</i><br>subsp. <i>jejuni</i><br>00-2425 | cjei | 1 | 1 | Region<br>1 | betalactone | 897,706 | 927,543 |  |  |  |
| <i>Campylobacter jejuni</i><br>subsp. <i>jejuni</i><br>R14     | cjer | 1 | 1 | Region<br>1 | betalactone | 963,554 | 993,393 |  |  |  |

|                                                                  |     |   |   |             |             |         |         |  |  |  |
|------------------------------------------------------------------|-----|---|---|-------------|-------------|---------|---------|--|--|--|
| <i>Campylobacter jejuni</i><br>subsp. <i>jejuni</i><br>MTVDSCj20 | cjv |   |   |             |             |         |         |  |  |  |
| <i>Campylobacter jejuni</i><br>subsp. <i>jejuni</i><br>00-1597   | cjl | 1 | 1 | Region<br>1 | betalactone | 856,759 | 886,598 |  |  |  |
| <i>Campylobacter jejuni</i><br>subsp. <i>jejuni</i><br>00-6200   | cjw | 1 | 1 | Region<br>1 | betalactone | 857,862 | 887,699 |  |  |  |
| <i>Campylobacter jejuni</i><br>RM1221                            | cjr | 1 |   |             |             |         |         |  |  |  |
| <i>Campylobacter jejuni</i><br>subsp. <i>doylei</i><br>269.97    | cjd | 1 | 1 | Region<br>1 | betalactone | 935,951 | 965,789 |  |  |  |
| <i>Campylobacter jejuni</i><br>32488                             | cjz | 1 | 1 | Region<br>1 | betalactone | 10,63   | 40,467  |  |  |  |

|                                                            |      |   |   |          |               |           |           |        |     |  |
|------------------------------------------------------------|------|---|---|----------|---------------|-----------|-----------|--------|-----|--|
| <i>Campylobacter jejuni</i> 4031                           | cjx  | 1 | 2 | Region 1 | thioamide-NRP | 181,841   | 244,976   |        |     |  |
|                                                            |      |   |   | Region 2 | arylpolyene   | 1,433,255 | 1,476,717 | APE Vf | 20% |  |
| <i>Campylobacter lari</i> RM2100                           | cla  | 1 |   |          |               |           |           |        |     |  |
| <i>Campylobacter lari</i> RM16701                          | clr  | 1 |   |          |               |           |           |        |     |  |
| <i>Campylobacter lari</i> RM16712                          | clm  | 1 |   |          |               |           |           |        |     |  |
| <i>Campylobacter lari</i> NCTC 11845                       | cln  | 1 |   |          |               |           |           |        |     |  |
| <i>Campylobacter lari</i> subsp. <i>concheus</i> LMG 11760 | cll  | 1 |   |          |               |           |           |        |     |  |
| <i>Campylobacter coli</i> 76339                            | ccol | 1 |   |          |               |           |           |        |     |  |
| <i>Campylobacter coli</i> CVM N29710                       | ccc  | 1 |   |          |               |           |           |        |     |  |

|                                     |      |   |  |  |  |  |  |  |  |  |
|-------------------------------------|------|---|--|--|--|--|--|--|--|--|
| <i>Campylobacter coli</i> 15-537360 | ccq  | 1 |  |  |  |  |  |  |  |  |
| <i>Campylobacter coli</i> RM1875    | ccf  | 1 |  |  |  |  |  |  |  |  |
| <i>Campylobacter coli</i> RM4661    | ccy  | 1 |  |  |  |  |  |  |  |  |
| <i>Campylobacter coli</i> RM5611    | ccoi | 1 |  |  |  |  |  |  |  |  |
| <i>Campylobacter coli</i> FB1       | ccof | 1 |  |  |  |  |  |  |  |  |
| <i>Campylobacter coli</i> OR12      | ccoo | 1 |  |  |  |  |  |  |  |  |
| <i>Campylobacter insulaenigrae</i>  | cis  | 1 |  |  |  |  |  |  |  |  |
| <i>Campylobacter volucris</i>       | cvo  | 1 |  |  |  |  |  |  |  |  |
| <i>Campylobacter peloridis</i>      | cpel | 1 |  |  |  |  |  |  |  |  |
| <i>Campylobacter</i> sp. RM16704    | camr | 1 |  |  |  |  |  |  |  |  |

|                                               |      |   |  |  |  |  |  |  |  |  |
|-----------------------------------------------|------|---|--|--|--|--|--|--|--|--|
| <i>Campylobacter subantarcticus</i> LMG 24374 | csm  | 1 |  |  |  |  |  |  |  |  |
| <i>Campylobacter subantarcticus</i> LMG 24377 | csf  | 1 |  |  |  |  |  |  |  |  |
| <i>Campylobacter helveticus</i>               | chv  | 1 |  |  |  |  |  |  |  |  |
| <i>Campylobacter cuniculorum</i>              | ccun | 1 |  |  |  |  |  |  |  |  |
| <i>Campylobacter lanienae</i>                 | clx  | 1 |  |  |  |  |  |  |  |  |
| <i>Campylobacter avium</i>                    | cavi | 1 |  |  |  |  |  |  |  |  |
| <i>Campylobacter hepaticus</i>                | chw  | 1 |  |  |  |  |  |  |  |  |
| <i>Campylobacter</i> sp. RM12175              | camz | 1 |  |  |  |  |  |  |  |  |
| <i>Campylobacter</i> sp. RM6137               | camy | 1 |  |  |  |  |  |  |  |  |

|                                       |      |   |  |  |  |  |  |  |  |  |
|---------------------------------------|------|---|--|--|--|--|--|--|--|--|
| <i>Campylobacter ornithocola</i>      | coj  | 1 |  |  |  |  |  |  |  |  |
| <i>Campylobacter upsaliensis</i>      | cux  | 1 |  |  |  |  |  |  |  |  |
| <i>Campylobacter armoricus</i>        | carm | 1 |  |  |  |  |  |  |  |  |
| <i>Campylobacter novaezeelandicae</i> | cnv  | 1 |  |  |  |  |  |  |  |  |
| <i>Malaciobacter mytili</i>           | amyt | 1 |  |  |  |  |  |  |  |  |

1. Nzuza, N.; Padayachee, T.; Syed, P. R.; Kryś, J. D.; Chen, W.; Gront, D.; Nelson, D. R.; Syed, K., Ancient Bacterial Class Alphaproteobacteria Cytochrome P450 Monooxygenases Can Be Found in Other Bacterial Species. *International journal of molecular sciences* **2021**, 22, (11), 5542.
2. Msomi, N. N.; Padayachee, T.; Nzuza, N.; Syed, P. R.; Kryś, J. D.; Chen, W.; Gront, D.; Nelson, D. R.; Syed, K., In silico analysis of P450s and their role in secondary metabolism in the bacterial class Gammaproteobacteria. *Molecules (Basel, Switzerland)* **2021**, 26, (6), 1538.
3. Blin, K.; Shaw, S.; Steinke, K.; Villebro, R.; Ziemert, N.; Lee, S. Y.; Medema, M. H.; Weber, T., antiSMASH 5.0: updates to the secondary metabolite genome mining pipeline. *Nucleic acids research* **2019**.
