# Supplementary material for: Lifestyles Shape the Cytochrome P450 Repertoire of the Bacterial Phylum Proteobacteria
Source: MDPI journal article supplement (doi:10.3390/ijms23105821), 2022-05-22
Supplement: s1 [file s1]

**CYP families:**

CYP116

CYP107

CYP172

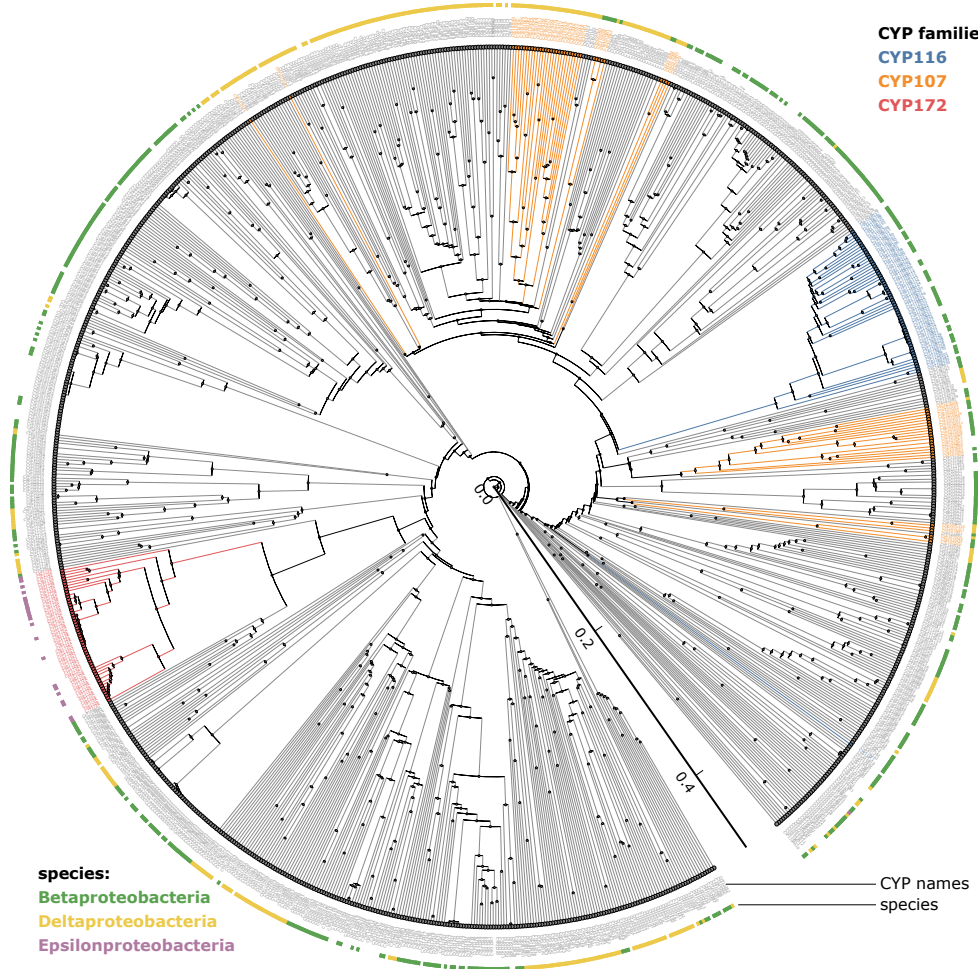

**Figure S1.** Information on proteobacterial species and their respective genera was used in the study. Species abbreviations and the P450 count of different species were also presented in the table. Species information is presented as per their class.
